# Supplementary material for: Comprehensive Bioinformatics Analysis Combined with Wet-Lab Experiments to Find Target Proteins of Chinese Medicine Monomer
Source: Molecules. 2022 Sep 19;27(18):6105. doi: 10.3390/molecules27186105 (PMC9504604; doi:10.3390/molecules27186105)
Supplement: Supplementary file 1 [file molecules-27-06105-s001.zip]

Archive with 6 entries (6 files):
- Supplementary materials.pdf
- Supplementary Table S1.xlsx
- Supplementary Table S2.xls
- Supplementary Table S3.xls
- Supplementary Table S4.xlsx
- Supplementary Table S5.csv
