# Supplementary material for: Comprehensive Bioinformatics Analysis Combined with Wet-Lab Experiments to Find Target Proteins of Chinese Medicine Monomer
Source: Molecules. 2022 Sep 19;27(18):6105. doi: 10.3390/molecules27186105 (PMC9504604; doi:10.3390/molecules27186105)
Supplement: Supplementary file 1 [file molecules-27-06105-s001.zip › Supplementary Table S1.xlsx]

## Sheet: 目录
Shanghai Sunny Biotech.Co.,Ltd.
Tel：0086-21-55231635 Fax：0086-21-65334155
Web:www.sunny-biotech.com E-mail：sales@sunny-biotech.com
	Product Name	CAS No.	Purity
1	Panaxadiol	19666-76-3	98%（HPLC）
2	Panaxatriol	32791-84-7	98%（HPLC）
3	Eleutheroside B	118-34-3	98%（HPLC）
4	Ginsenoside Rg1	22427-39-0	98%（HPLC）
5	Ginsenoside Rb1	41753-43-9	98%（HPLC）
6	Strychnine	57-24-9	98%（HPLC）
7	Brucine	357-57-3	98%（HPLC）
8	Methyl salicylate	119-36-8	98%（HPLC）
9	Farrerol	24211-30-1	98%（HPLC）
10	Liquiritin	551-15-5	98%（HPLC）
11	Paeonol	552-41-0	98%（HPLC）
12	Oleanolic acid	508-02-1	98%（HPLC）
13	trans-Cinnamaldehyde	14371-10-9	98%（HPLC）
14	Tetrandrine	518-34-3	98%（HPLC）
15	Stachydrine hydrochloride	4136-37-2	98%（HPLC）
16	Berberine hydrochloride	633-65-8	98%（HPLC）
17	Baicalin	21967-41-9	98%（HPLC）
18	Indirubin	479-41-4	97%（HPLC）
19	Aconitine	302-27-2	98%（HPLC）
20	Hesperidin	520-26-3	98%（HPLC）
21	Naringin	10236-47-2	98%（HPLC）
22	Glycyrrhetinic acid	471-53-4	98%（HPLC）
23	Eugenol	97-53-0	98%（HPLC）
24	Rotundine	10097-84-4	98%（HPLC）
25	Tetrahydropalmatine	2934-97-6	98%（HPLC）
26	Synephrine	94-07-5	98%（HPLC）
27	Menthol	89-78-1	98%（GC）
28	Magnolol	528-43-8	98%（HPLC）
29	Honokiol	35354-74-6	98%（HPLC）
30	Glycyrrhizic Acid Monoammonium Salt	53956-04-0	98%（HPLC）
31	Indigo	482-89-3	98%（HPLC）
32	Resibufogenin	465-39-4	98%（HPLC）
33	Muscone	541-91-3	98%（GC）
34	Deoxycholic acid	83-44-3	98%（HPLC）
35	Palmatine Chloride	10605-02-4	98%（HPLC）
36	Jatrorrhizine chloride	6681-15-8	98%（HPLC）
37	Jujuboside B	55466-05-2	98%（HPLC）
38	Jujuboside A	55466-04-1	98%（HPLC）
39	Glycine	56-40-6	98%（HPLC）
40	Paeoniflorin	23180-57-6	98%（HPLC）
41	Icariin	489-32-7	98%（HPLC）
42	Isopsoralen	523-50-2	98%（HPLC）
43	Psoralen	66-97-7	98%（HPLC）
44	Esculin	531-75-9	98%（HPLC）
45	Esculetin	305-01-1	98%（HPLC）
46	Ursolic acid	77-52-1	98%（HPLC）
47	Benzoylmesaconine	63238-67-5	98%（HPLC）
48	Goitrin	13190-34-6	98%（HPLC）
49	Zeaxanthin	144-68-3	98%（HPLC）
50	Norisoboldine	23599-69-1	98%（HPLC）
51	Eleutheroside A	474-58-8	95%（HPLC）
52	Glutathione	70-18-8	98%（HPLC）
53	Quinic acid	77-95-2	98%（HPLC）
54	Benzoylaconine	466-24-0	98%（HPLC）
55	Benzoylhypaconine	63238-66-4	98%（HPLC）
56	Cblconin	125-10-0	98%（HPLC）
57	Erianin	95041-90-0	98%（HPLC）
58	Phytol	150-86-7	95%（HPLC）
59	Albiflorin	39011-90-0	98%（HPLC）
60	Mogroside V	88901-36-4	98%（HPLC）
61	Ziyuglycoside I	35286-58-9	98%（HPLC）
62	Methyl hexadecanoate	112-39-0	98%（HPLC）
63	Naringin dihydrochalcone	18916-17-1	98%（HPLC）
64	Linderane	13476-25-0	98%（HPLC）
65	Parishin B	174972-79-3	98%（HPLC）
66	Etoposide	33419-42-0	98%（HPLC）
67	Dihydroartemisinic acid	85031-59-0	98%（HPLC）
68	Z-Ligustilide	81944-09-4	98%（HPLC）
69	Artesunate	88495-63-0	98%（HPLC）
70	Betulin	473-98-3	98%（HPLC）
71	Naringenin	480-41-1	98%（HPLC）
72	Kaempferol	520-18-3	98%（HPLC）
73	Prim-O-glucosylcimifugin	80681-45-4	98%（HPLC）
74	Sarsasapogenin	126-19-2	98%（HPLC）
75	Notoginsenoside R1	80418-24-2	98%（HPLC）
76	Aristolochic acid A	313-67-7	98%（HPLC）
77	Geniposide	24512-63-8	98%（HPLC）
78	Peimine	23496-41-5	98%（HPLC）
79	Peiminine	18059-10-4	98%（HPLC）
80	Puerarin	3681-99-0	98%（HPLC）
81	Chlorogenic acid	327-97-9	98%（HPLC）
82	Ginsenoside Re	52286-59-6	98%（HPLC）
83	Emodin	518-82-1	98%（HPLC）
84	Rhein	478-43-3	98%（HPLC）
85	Physcion	521-61-9	98%（HPLC）
86	Alantolactone	546-43-0	98%（HPLC）
87	Isoalantolactone	470-17-7	98%（HPLC）
88	Alpinetin	36052-37-6	98%（HPLC）
89	Alpinetin chalcone	19309-14-9	98%（HPLC）
90	Doxyschizandrin	61281-38-7	98%（HPLC）
91	Schisandrin B	61281-37-6	98%（HPLC）
92	Tanshinone IIA	568-72-9	98%（HPLC）
93	Kashmirine	61825-98-7	98%（HPLC）
94	Scopoletin	92-61-5	98%（HPLC）
95	Alkannin	517-88-4	98%（HPLC）
96	Gentiopicrin	20831-76-9	98%（HPLC）
97	Curculigoside	85643-19-2	98%（HPLC）
98	Patchouli alcohol	5986-55-0	98%（HPLC）
99	Ferulic acid	1135-24-6	98%（HPLC）
100	Sinomenine	115-53-7	98%（HPLC）
101	Piperine	94-62-2	98%（HPLC）
102	Vanillic acid	121-34-6	98%（HPLC）
103	Saikosaponin A	20736-09-8	98%（HPLC）
104	Saikosaponin D	20874-52-6	98%（HPLC）
105	Oxymatrine	16837-52-8	98%（HPLC）
106	Astragaloside IV	84687-43-4	98%（HPLC）
107	Borneol	507-70-0	90%（HPLC）
108	Camphor	76-22-2	95%（HPLC）
109	a-Cyperone	473-08-5	98%（HPLC）
110	Clinodiside A	916347-31-4	98%（HPLC）
111	Cantharidin	56-25-7	98%（HPLC）
112	Sophoridine	6882-68-4	98%（HPLC）
113	Swertiamarin	17388-39-5	98%（HPLC）
114	Cinnamic acid	621-82-9	98%（HPLC）
115	Aloin A	1415-73-2	98%（HPLC）
116	Eucalyptol	470-82-6	98%（HPLC）
117	4-Mthoxysalicylaldehyde	673-22-3	98%（HPLC）
118	Butyl 4-Hydroxybenzoate	94-26-8	98%（HPLC）
119	Fangchinoline (Hanfangchin B)	436-77-1	98%（HPLC）
120	Rhapontin	155-58-8	98%（HPLC）
121	Aloe emodin	481-72-1	98%（HPLC）
122	Chrysophanol	481-74-3	98%（HPLC）
123	Andrographolide	5508-58-7	98%（HPLC）
124	Hypaconitine	6900-87-4	98%（HPLC）
125	Mesaconitine	2752-64-9	98%（HPLC）
126	Evodine	1180-71-8	98%（HPLC）
127	Rutaecarpine	84-26-4	98%（HPLC）
128	Evodiamine	518-17-2	98%（HPLC）
129	20(R)-Ginsenoside Rg3	38243-03-7	98%（HPLC）
130	20(s)-Ginsenoside Rg3	14197-60-5	98%（HPLC）
131	Matrine	519-02-8	98%（HPLC）
132	Gastrodin	62499-27-8	98%（HPLC）
133	Catalpol	2415-24-9	98%（HPLC）
134	Protocatechualdehyde	139-85-5	98%（HPLC）
135	Ligustrazine Hydrochloride；Chuanxiongzine hydrochloride	76494-51-4	98%（HPLC）
136	Salidroside	10338-51-9	98%（HPLC）
137	Arctiin	20362-31-6	98%（HPLC）
138	Amygdalin	29883-15-6	98%（HPLC）
139	Phillyrin	487-41-2	98%（HPLC）
140	Osthole	484-12-8	98%（HPLC）
141	Curcumin	458-37-7	98%（HPLC）
142	Sennoside A	81-27-6	98%（HPLC）
143	Sennoside B	128-57-4	98%（HPLC）
144	Isoimperatorin	482-45-1	98%（HPLC）
145	Imperatorin	482-44-0	98%（HPLC）
146	1,8-Dihydroxyanthraquinone	117-10-2	98%（HPLC）
147	Gallic acid	149-91-7	98%（HPLC）
148	D-Glucose	50-99-7	98%（HPLC）
149	Methylnonylketone	112-12-9	98%（HPLC）
150	Sesamin	607-80-7	98%（HPLC）
151	Isofraxidin	486-21-5	98%（HPLC）
152	Anisaldehyde	123-11-5	98%（HPLC）
153	nonivamide	2444-46-4	95%（HPLC）
154	Pseudoginsenoside F11	69884-00-0	98%（HPLC）
155	Scutellarin	27740-01-8	98%（HPLC）
156	2,3,5,4'-Tetrahydroxy stilbene-2-Ο-β-D-glucoside	82373-94-2	98%（HPLC）
157	Beta-Sitosterol	83-46-5	98%（HPLC）
158	Cryptotanshinone	35825-57-1	98%（HPLC）
159	Protopine	130-86-9	98%（HPLC）
160	Dehydroandrographolide	134418-28-3	98%（HPLC）
161	Sodium Danshensu	67920-52-9	98%（HPLC）
162	Silybin	22888-70-6	98%（HPLC）
163	Schizandrol A	7432-28-2	98%（HPLC）
164	Cordycepin	73-03-0	98%（HPLC）
165	Isorhamnetin	480-19-3	98%（HPLC）
166	Ginkgolide B	15291-77-7	98%（HPLC）
167	Ginkgolide C	15291-76-6	98%（HPLC）
168	Ginkgolide A	15291-75-5	98%（HPLC）
169	Bilobalide	33570-04-6	98%（HPLC）
170	Methyl-p-couMaric acid ethyl ester	1929-30-2	98%（HPLC）
171	Dracorhodin perochlorate	125536-25-6	98%（HPLC）
172	Cinobufagin	470-37-1	98%（HPLC）
173	Tanshinone I	568-73-0	98%（HPLC）
174	Panax notoginsenosides	NA	90%（HPLC）
175	L-Valine	72-18-4	98%（HPLC）
176	L-(+)Citrulline	372-75-8	98%（HPLC）
177	L-Leucine	61-90-5	98%（HPLC）
178	Catechol	154-23-4	97%（HPLC）
179	Epicatechol, (-)-	490-46-0	98%（HPLC）
180	Adenosine	58-61-7	98%（HPLC）
181	Pseudolaric Acid B	82508-31-4	98%（HPLC）
182	Magnolin	31008-18-1	98%（HPLC）
183	Trigonelline hydrochloride	6138-41-6	98%（HPLC）
184	Mollugin	55481-88-4	98%（HPLC）
185	Caffeic acid	331-39-5	98%（HPLC）
186	Adenine	73-24-5	98%（HPLC）
187	Uridine	58-96-8	98%（HPLC）
188	Cyclovirobuxine D	860-79-7	98%（HPLC）
189	L-Threonine	72-19-5	98%（HPLC）
190	histidine	71-00-1	98%（HPLC）
191	Asiaticoside	16830-15-2	98%（HPLC）
192	Madecassoside	34540-22-2	98%（HPLC）
193	Betaine	107-43-7	98%（HPLC）
194	Succinic acid	110-15-6	98%（HPLC）
195	alpha-Pinene	80-56-8	95%（HPLC）
196	(1R)-(+)-α-Pinene	7785-70-8	98%（GC）
197	Octacosanol	557-61-9	95%（GC）
198	Daphnetol	486-35-1	98%（HPLC）
199	Allantoin	97-59-6	98%（HPLC）
200	Daidzein	486-66-8	98%（HPLC）
201	Linalool	78-70-6	98%（GC）
202	D-Fructose	57-48-7	98%（HPLC）
203	DL-Arabinose	147-81-9	98%（HPLC)
204	sucrose	57-50-1	98%（HPLC）
205	D-Xylose	6763-34-4	98%（HPLC）
206	Guaiacol	90-05-1	98%（HPLC）
207	Scoparone	120-08-1	98%（HPLC）
208	DL-Isoborneol	124-76-5	90%（GC）
209	Herniarin; 7-Methoxycoumarin	531-59-9	98%（HPLC）
210	Wogonin	632-85-9	98%（HPLC）
211	Stevioside	57817-89-7	98%（HPLC）
212	Luteolin	491-70-3	98%（HPLC）
213	Hyperoside	482-36-0	98%（HPLC）
214	5-O-methylvisammioside	84272-85-5	98%（HPLC）
215	Costunolide	553-21-9	98%（HPLC）
216	Dehydrocostus Lactone	477-43-0	98%（HPLC）
217	Linarin	480-36-4	98%（HPLC）
218	Schizantherin A	58546-56-8	98%（HPLC）
219	Acteoside; Verbascoside	61276-17-3	98%（HPLC）
220	Bergenin	477-90-7	98%（HPLC）
221	Resveratrol	501-36-0	98%（HPLC）
222	Tubeimoside I	102040-03-9	98%（HPLC）
223	Pinoresinol diglucoside	63902-38-5	98%（HPLC）
224	Quercitrin	522-12-3	98%（HPLC）
225	Diosgenin	512-04-9	98%（HPLC）
226	Fumaric acid	110-17-8	98%（HPLC）
227	Curcurbitacin IIa	58546-34-2	98%（HPLC）
228	Total ginsenosides from Radix Ginseng	NA	80%（HPLC）
229	Casticin(Vitexicarpin)	479-91-4	98%（HPLC）
230	Lysionotin	152743-19-6	98%（HPLC）
231	Irisflorentin	41743-73-1	98%（HPLC）
232	Loureirin B	119425-90-0	98%（HPLC）
233	Loureirin A	119425-89-7	98%（HPLC）
234	Salvianolic acid B	121521-90-2	98%（HPLC）
235	Nuciferine	475-83-2	98%（HPLC）
236	Triptolide	38748-32-2	98%（HPLC）
237	Isorhamnetin 3-O-neohespeidoside	55033-90-4	98%（HPLC）
238	Senegenin	2469-34-3	98%（HPLC）
239	Typhaneoside	104472-68-6	98%（HPLC）
240	Polydatin	27208-80-6	98%（HPLC）
241	L-Tyrosine	60-18-4	98%（HPLC）
242	L-Hydroxyproline	51-35-4	98%（HPLC）
243	Rutin	153-18-4	98%（UV）
244	Hesperetin	520-33-2	98%（HPLC）
245	Methyl Hesperidin	11013-97-1	98%（HPLC）
246	Columbianadin	5058-13-9	98%（HPLC）
247	Crocin I	42553-65-1	98%（HPLC）
248	Crocin II	55750-84-0	98%（HPLC）
249	Baicalein	491-67-8	98%（HPLC）
250	Picroside I	27409-30-9	98%（HPLC）
251	Picroside II	39012-20-9	98%（HPLC）
252	TanshinoneIIA	69659-80-9	98%（HPLC）
253	Mangiferin	4773-96-0	98%（HPLC）
254	Camptothecin	7689-03-4	98%（HPLC）
255	Dehydrodiisoeugenol	2680-81-1	98%（HPLC）
256	Pterostilbene	537-42-8	98%（HPLC）
257	Calycosin	20575-57-9	98%（HPLC）
258	Formononetin	485-72-3	98%（HPLC）
259	Calycosin-7-O-β-D-glucoside	20633-67-4	98%（HPLC）
260	Ononin	486-62-4	98%（HPLC）
261	Levistolide A	88182-33-6	98%（HPLC）
262	Geniposidic acid	27741-01-1	98%（HPLC）
263	Leonurine hydrochloride	24735-18-0	98%（HPLC）
264	irigenin	548-76-5	98%（HPLC）
265	1-Kestose	470-69-9	98%（HPLC）
266	Nystose	13133-07-8	98%（HPLC）
267	Cholesterol	57-88-5	98%（HPLC）
268	Oleic acid	112-80-1	98%（HPLC）
269	Linoleic acid	60-33-3	95%（HPLC）
270	Corilagin	23094-69-1	98%（HPLC）
271	5-Hydroxymethylfurfural	67-47-0	98%（HPLC）
272	Linolenic acid	463-40-1	97%（HPLC）
273	Tectoridin	611-40-5	98%（HPLC）
274	Octadecane	593-45-3	98%（HPLC）
275	Safflomin A; Hydroxysafflor yellow A	78281-02-4	98%（HPLC）
276	Loganin	18524-94-2	98%（HPLC）
277	Loganic acid	22255-40-9	98%（HPLC）
278	O-Methyleugenol	93-15-2	98%（HPLC）
279	Podophyllotoxin	518-28-5	98%（HPLC）
280	Cepharanthine	481-49-2	98%（HPLC）
281	Benzaldehyde	100-52-7	98%（HPLC）
282	2-Pyrrolidinecarboxylic acid	147-85-3	98%（HPLC）
283	Oxysophocarpine	26904-64-3	98%（HPLC）
284	Dictamnine	484-29-7	98%（HPLC）
285	Germacrone	6902-91-6	98%（HPLC）
286	Isoferulic acid	537-73-5	98%（HPLC）
287	Galangin	548-83-4	98%（HPLC）
288	Fraxinellone	28808-62-0	98%（HPLC）
289	Chrysin	480-40-0	98%（HPLC）
290	Sinapine thiocyanate	7431-77-8	98%（HPLC）
291	Genistein	446-72-0	98%（HPLC）
292	Glycitin	40246-10-4	98%（HPLC）
293	Daidzin	552-66-9	98%（HPLC）
294	Echinacoside	82854-37-3	98%（HPLC）
295	Pyrogallol	87-66-1	99%（HPLC）
296	Tyrosol	501-94-0	98%（HPLC）
297	Sophoricoside	152-95-4	98%（HPLC）
298	Menthone	10458-14-7	98%（GC）
299	Dioscin	19057-60-4	98%（HPLC）
300	Genistin	529-59-9	98%（HPLC）
301	Cimifugin	37921-38-3	98%（HPLC）
302	Praeruptorin A	73069-27-9	98%（HPLC）
303	Eleutheroside E	39432-56-9	98%（HPLC）
304	Ginsenoside Rb2	11021-13-9	98%（HPLC）
305	Ginsenoside Rf	52286-58-5	98%（HPLC）
306	Luteoloside	5373-11-5	98%（HPLC）
307	Oridonin	28957-04-2	98%（HPLC）
308	Kirenol	52659-56-0	98%（HPLC）
309	Pectolinarin	28978-02-1	98%（HPLC）
310	Harpagide	6926-08-5	98%（HPLC）
311	Harpagoside	19210-12-9	98%（HPLC）
312	Fraxetin	574-84-5	98%（HPLC）
313	Lobetyolin	136085-37-5	98%（HPLC）
314	Hederagenin	465-99-6	98%（HPLC）
315	Betulonicacid	4481-62-3	98%（HPLC）
316	7-Hydroxycoumarin	93-35-6	98%（HPLC）
317	7-Hydroxy-4-methylcoumarin	90-33-5	98%（HPLC）
318	2-Ketoglutaric acid	328-50-7	98%（HPLC）
319	2-Oxosuccinic acid	328-42-7	98%（HPLC）
320	2-Hydroxyanthraquinone	605-32-3	97%（HPLC）
321	Saccharin Sodium	128-44-9	98%（HPLC）
322	3-(Dimethylaminomethyl)indole	87-52-5	98%（HPLC）
323	2,4-Hexadienoic acid	110-44-1	98%（HPLC）
324	3,7-Dimethylocta-2,6-dienal	5392-40-5	98%（GC）
325	L-Methionine methyl ester hydrochloride	2491-18-1	99%（HPLC）
326	DL-Methionine	59-51-8	98%（HPLC）
327	Tyramine	51-67-2	98%（HPLC）
328	L-Phenylalanine,L-phenylalanyl-	2577-40-4	98%（HPLC）
329	N-Acetylglycine	543-24-8	98%（HPLC）
330	L-Homoarginine	156-86-5	98%（HPLC）
331	3-Chloro-L-tyrosine	7423-93-0	98%（HPLC）
332	5-Hydroxytryptophan	56-69-9	98%（HPLC）
333	5'-Uridylic acid	58-97-9	98%（HPLC）
334	Aspartame	22839-47-0	98%（HPLC）
335	(S)-2-Acetamido-5-guanidinopentanoic acid	155-84-0	98%（HPLC）
336	L(-)-Pipecolinic acid	3105-95-1	98%（HPLC）
337	Purine	120-73-0	98%（HPLC）
338	Tea polyphenol	84650-60-2	99%（HPLC）
339	Yohimbine hydrochloride	65-19-0	98%（HPLC）
340	reduced nicotinamide adenine dinucleotide (NADH),还原型	606-68-8	98%（HPLC）
341	4'-Hydroxyacetophenone	99-93-4	98%（HPLC）
342	D-Alanine	338-69-2	98%（HPLC）
343	Sinomenine hydrochloride	6080-33-7	98%（HPLC）
344	Pinane	473-55-2	99%（HPLC）
345	Hydroxyecdysone	5289-74-7	98%（HPLC）
346	Pyridoxine	65-23-6	99%（HPLC）
347	Calcium pantothenate	137-08-6	99%（HPLC）
348	Hypocrellin A	77029-83-5	98%(HPLC)
349	Rhein	478-43-3	98%（HPLC）
350	Ursodeoxycholic acid	128-13-2	98%（HPLC）
351	Chenodeoxycholic acid	474-25-9	98%（HPLC）
352	10-Hydroxy-2-decenoic acid	14113-05-4	98%（HPLC）
353	Sodium taurocholate	145-42-6	95%（HPLC）
354	Tauroursodeoxycholic acid	14605-22-2	98%（HPLC）
355	Sodium taurochenodeoxycholate	6009-98-9	98%（HPLC）
356	L-Glutamic acid	56-86-0	98%（HPLC）
357	Rutin	153-18-4	98%（HPLC）
358	L-Phenylalanine	63-91-2	98%（HPLC）
359	2-Anthraquinone Carboxylic Acid	117-78-2	98%（HPLC）
360	Progesterone	57-83-0	98%（HPLC）
361	Oxalic acid	144-62-7	98%（HPLC）
362	Kojic acid	501-30-4	98%（HPLC）
363	Dotriacontane	544-85-4	98%（HPLC）
364	Dibutyl phthalate	84-74-2	98%（HPLC）
365	Amyl acetate	628-63-7	98%（HPLC）
366	Fisetin	528-48-3	98%（HPLC）
367	3-Phenylpropionic acid	501-52-0	98%（HPLC）
368	Pentadecanoic acid	1002-84-2	98%（GC）
369	L-Isoleucine	73-32-5	98%（HPLC）
370	Geraniol	106-24-1	98%（HPLC）
371	D-Galacturonic acid	91510-62-2	98%（HPLC）
372	Camphene	79-92-5	95%（HPLC)
373	3-Methoxy-1-propanol	1589-49-7	98%（HPLC）
374	Gentisic acid	490-79-9	98%（HPLC）
375	Isoquercitrin	482-35-9	98%（HPLC）
376	Orientin	28608-75-5	98%（HPLC）
377	Ginsenoside Rg2	52286-74-5	98%（HPLC）
378	Epimedin C	110642-44-9	98%（HPLC）
379	Monotropein	5945-50-6	98%（HPLC）
380	3,5-Dicaffeoylquinic acid	2450-53-5	98%（HPLC）
381	3,4-Dicaffeoylquinic acid	14534-61-3	98%（HPLC）
382	4,5-Dicaffeoylquinic acid	57378-72-0	98%（HPLC）
383	Dulcitol	608-66-2	98%（HPLC）
384	Diosmetin	520-34-3	98%（HPLC）
385	Asperosaponin VI	39524-08-8	98%（HPLC）
386	Aurantio-obtusin	67979-25-3	98%（HPLC）
387	Fibrauretin	3486-67-7	98%（HPLC）
388	Boldine	476-70-0	97%（HPLC）
389	Astilbin	29838-67-3	98%（HPLC）
390	Demethylpodophyllotoxin, 4'-	6559-91-7	98%（HPLC）
391	Betulinic acid	472-15-1	98%（HPLC）
392	Periplocin	13137-64-9	98%（HPLC）
393	Euphorbia Factor L1	28649-59-4	98%（HPLC）
394	Curdione	13657-68-6	98%（HPLC）
395	Daurisoline	70553-76-3	98%（HPLC）
396	Nardosinone	23720-80-1	98%（HPLC）
397	3,29-Dibenzoyl rarounitriol	873001-54-8	98%（HPLC）
398	1-perillaldehyde	18031-40-8	98%（HPLC）
399	Zingerone	122-48-5	98%（HPLC）
400	Taxifolin	480-18-2	98%（HPLC）
401	Nobiletin	478-01-3	98%（HPLC）
402	Ellagic acid	476-66-4	98%（HPLC）
403	Apigenin	520-36-5	98%（HPLC）
404	Forsythoside A	79916-77-1	98%（HPLC）
405	Acacetin	480-44-4	98%（HPLC）
406	Pinocembrin	480-39-7	98%（HPLC）
407	Notopterol	88206-46-6	98%（HPLC）
408	Schaftoside	51938-32-0	98%（HPLC）
409	Oroxylin A	480-11-5	98%（HPLC）
410	Fucosterol	17605-67-3	98%（HPLC）
411	Dipsacoside B	33289-85-9	98%（HPLC）
412	Macranthoidin B	136849-88-2	98%（HPLC）
413	Aucubin	479-98-1	98%（HPLC）
414	L-Abrine	21339-55-9	98%（HPLC）
415	Lupeol	545-47-1	98%（HPLC）
416	Leonurine	24697-74-3	98%（HPLC）
417	Eupatilin	22368-21-4	98%（HPLC）
418	Tectorigenin	548-77-6	98%（HPLC）
419	Narirutin	14259-46-2	98%（HPLC）
420	DPPH	84077-81-6	98%（HPLC）
421	Corosolic acid	4547-24-4	98%（HPLC）
422	[6]-Gingerol	23513-14-6	98%（HPLC）
423	3',6-Disinapoylsucrose	139891-98-8	98%（HPLC）
424	Tenuifolin	20183-47-5	98%（HPLC）
425	Coptisine Chloride	6020-18-4	98%（HPLC）
426	Ingenol	30220-46-3	98%（HPLC）
427	Arctigenin	7770-78-7	98%（HPLC）
428	Glycyrrhizic acid	1405-86-3	98%（HPLC）
429	Bisdemethoxycurcumin	24939-16-0	98%（HPLC）
430	1-Deoxynojirimycin	19130-96-2	98%（HPLC）
431	Atractylenolide III	73030-71-4	98%（HPLC）
432	Atractylenolide II	73069-14-4	98%（HPLC）
433	Atractylenolide I	73069-13-3	98%（HPLC）
434	Hederin, α-	27013-91-8	98%（HPLC）
435	Hederacoside C	14216-03-6	98%（HPLC）
436	Cinnamyl Alcohol	104-54-1	98%（HPLC）
437	BOC-L-Proline	15761-39-4	98%（HPLC）
438	Arbutin	497-76-7	98%（HPLC）
439	Isoliensinine	6817-41-0	98%（HPLC）
440	Abietic acid	514-10-3	98%（HPLC）
441	Abietic acid	514-10-3	98%（HPLC）
442	Eugenol acetate	93-28-7	98%（GC）
443	Lycorine	476-28-8	98%（HPLC）
444	L-Quebrachitol	642-38-6	98%（HPLC）
445	(+)-Usniacin	7562-61-0	98%（HPLC）
446	Citropten	487-06-9	98%（HPLC）
447	Cisplatin	15663-27-1	98%（HPLC）
448	Alnustone	33457-62-4	98%（HPLC）
449	Vitamin C	50-81-7	98%（HPLC）
450	Methyl caffeoate	3843-74-1	98%（HPLC）
451	Thymine	65-71-4	98%（HPLC）
452	Guanosine	118-00-3	98%（HPLC）
453	Inosine	58-63-9	98%（HPLC）
454	Tetrahydroberberine	522-97-4	98%（HPLC）
455	Cichoric acid	6537-80-0	98%（HPLC）
456	3-Hydroxyflavone	577-85-5	98%（HPLC）
457	6-Shogaol	555-66-8	98%（HPLC）
458	Schisandrin C	61301-33-5	98%（HPLC）
459	Carnosic acid	3650-09-7	98%（HPLC）
460	Aescin	6805-41-0	98%（HPLC）
461	Cyanidin chloride	528-58-5	98%（HPLC）
462	L-Aspartic acid	56-84-8	98%（HPLC）
463	L-Cystine	56-89-3	98%（HPLC）
464	L-Glutamine	56-85-9	98%（HPLC）
465	L-Alanine	56-41-7	98%（HPLC）
466	3-Bromoisonicotinic acid	13959-02-9	98%（HPLC）
467	Vitamin E	59-02-9	97%（HPLC）
468	Cytosine	71-30-7	98%（HPLC）
469	2'-Deoxyguanosine	961-07-9	98%（HPLC）
470	Atractylodin	55290-63-6	98%（HPLC）
471	Protodioscin	55056-80-9	98%（HPLC）
472	Embelin	550-24-3	98%（HPLC）
473	Phlorizin	60-81-1	98%（HPLC）
474	Toosendanin; Chuanliansu; 12-Acetoxyamoorastatin	58812-37-6	98%（HPLC）
475	Ergosterol	57-87-4	98%（HPLC）
476	Polygalacic acid	1260-04-4	98%（HPLC）
477	Pseudoprotodioscin	102115-79-7	98%（HPLC）
478	Platycodin D	58479-68-8	98%（HPLC）
479	Baohuoside I	113558-15-9	98%（HPLC）
480	Neohesperidin	13241-33-3	98%（HPLC）
481	Neohesperidin dihydrochalcone	20702-77-6	98%（HPLC）
482	Ginsenoside Rd	52705-93-8	98%（HPLC）
483	Nodakenin	495-31-8	98%（HPLC）
484	Isoacteoside	61303-13-7	98%（HPLC）
485	Phloretin	60-82-2	98%（HPLC）
486	Ginsenoside Rh2; 20(s)-Ginsenoside Rh2	78214-33-2	98%（HPLC）
487	Alisol B,23-acetate; 23-O-Acetylalisol B；Alisol B Acetate	26575-95-1	98%（HPLC）
488	alpha-terthiophene	1081-34-1	98%（HPLC）
489	a-Terpineol	98-55-5	90.0%(GC)
490	Praeruptorin B	4970-26-7	98%（HPLC）
491	Anemoside B4	129741-57-7	98%（HPLC）
492	Epicatechin gallate（ECG）	1257-08-5	98%（HPLC）
493	p-Hydroxybenzyl alcohol	623-05-2	98%（HPLC）
494	cis-Anethol	104-46-1	98%（HPLC）
495	Glycerol trioleate	122-32-7	鉴别
496	Wogonoside	51059-44-0	98%（HPLC）
497	Phenethyl caffeate	104594-70-9	98%（HPLC）
498	Cycloastragenol	84605-18-5	98%（HPLC）
499	Ethyl caffeate	102-37-4	98%（HPLC）
500	Tussilagone	104012-37-5	98%（HPLC）
501	Celastrol	34157-83-0	98%（HPLC）
502	Rosavin	84954-92-7	98%（HPLC）
503	Rosmarinic acid	20283-92-5	98%（HPLC）
504	Morroniside (α+β)	25406-64-8	98%（HPLC）
505	Vitexin	3681-93-4	98%（HPLC）
506	Purpurin	81-54-9	98%（HPLC）
507	Arecoline hydrobromide	300-08-3	98%（HPLC）
508	Demethoxycurcumin	22608-11-3	98%（HPLC）
509	Ginsenoside Rb3	68406-26-8	98%（HPLC）
510	Nicotiflorin	17650-84-9	98%（HPLC）
511	Narcissin	604-80-8	98%（HPLC）
512	Spinosin	72063-39-9	98%（HPLC）
513	Amentoflavone	1617-53-4	98%（HPLC）
514	Specneuzhenide	39011-92-2	98%（HPLC）
515	Gambogic acid	2752-65-0	98%（HPLC）
516	Dihydromyricetin	27200-12-0	98%（HPLC）
517	Carvacrol	499-75-2	98%（HPLC）
518	Phellodendrine chloride	104112-82-5	98%（HPLC）
519	Myricitrin	17912-87-7	98%（HPLC）
520	Monocrotaline	315-22-0	98%（HPLC）
521	Rhoifolin	17306-46-6	98%（HPLC）
522	Homoorientin	4261-42-1	98%（HPLC）
523	Gengkwanin	437-64-9	98%（HPLC）
524	Pedunculoside	42719-32-4	98%（HPLC）
525	p-Hydroxybenzoic acid	99-96-7	98%（HPLC）
526	Theanine	3081-61-6	98%（HPLC）
527	2,3-Dimethoxybenzoic acid	1521-38-6	98%（HPLC）
528	Rubiadin-1-methyl ether	117-02-2	98%（HPLC）
529	D-Ribose	50-69-1	98%（HPLC）
530	Nootkatone, (+)-	4674-50-4	97%（HPLC）
531	Huperzine A	102518-79-6	98%（HPLC）
532	Diosmin	520-27-4	98%（HPLC）
533	Raffinose	512-69-6	98%（HPLC）
534	Neodiosmin	38665-01-9	98%（HPLC）
535	Apigetrin(Apigenin-7-O-glucoside)	578-74-5	98%（HPLC）
536	Cyanidin-3-glucoside chloride; Chrysanthemin	7084-24-4	98%（HPLC）
537	Baccatin III	27548-93-2	98%（HPLC）
538	10-Deacetylbaccatin III	32981-86-5	98%（HPLC）
539	DL-Tartaric acid	133-37-9	98%（HPLC）
540	11-Keto-beta-boswellic acid	17019-92-0	98%（HPLC）
541	Aristololactam	13395-02-3	98%（HPLC）
542	2,6-Dihydroxypurine	69-89-6	98%（HPLC）
543	Hypoxanthine	68-94-0	98%（HPLC）
544	Guanine	73-40-5	98%（HPLC）
545	3,5-Dimethoxytoluene	4179-19-5	98%（HPLC）
546	3,4,5-Trimethoxytoluene	6443-69-2	98%（HPLC）
547	Salicylic acid	69-72-7	98%（HPLC）
548	Indole-3-acetic acid	87-51-4	98%（HPLC）
549	3-Indolebutyric acid	133-32-4	98%（HPLC）
550	Kinetin	525-79-1	98%（HPLC）
551	Uracil	66-22-8	98%（HPLC）
552	2'-Deoxyadenosine	958-09-8	98%（HPLC）
553	Thymidine	50-89-5	98%（HPLC）
554	Safrole	94-59-7	98%（HPLC）
555	Gallic Acid Ethyl Ester	831-61-8	98%（HPLC）
556	Abscisic acid	14375-45-2	98%（HPLC）
557	3-Indoleacetamide	879-37-8	98%（HPLC）
558	Creatinine	60-27-5	98%（HPLC）
559	3-Phenylpyruvic acid	156-06-9	98%（HPLC）
560	Phytosphingosine	13552-11-9	98%（HPLC）
561	Coumarin	91-64-5	98%（HPLC）
562	Raspberry Ketone	5471-51-2	98%（HPLC）
563	L-Serine	56-45-1	98%（HPLC）
564	L(+)-Arginine	74-79-3	98%（HPLC）
565	Goitrine	1072-93-1	98%（HPLC）
566	Lovastatin	75330-75-5	98%（HPLC）
567	Sinapic acid	530-59-6	98%（HPLC）
568	L-Tryptophan	73-22-3	98%（HPLC）
569	Stigmasterol	83-48-7	98%（HPLC）
570	Schisanhenol	69363-14-0	98%（HPLC）
571	Genipin	6902-77-8	98%（HPLC）
572	Dehydroevodiamine	67909-49-3	98%（HPLC）
573	Neferine	2292-16-2	98%（HPLC）
574	Solamarine	20311-51-7	98%（HPLC）
575	Vinblastine	865-21-4	98%（HPLC）
576	Epigallocatechin gallate	989-51-5	98%（HPLC）
577	Quercetin	117-39-5	98%（HPLC）
578	Dihydroartemisinin	71939-50-9	98%（HPLC）
579	Salicin	138-52-3	98%（HPLC）
580	Parthenolide	20554-84-1	98%（HPLC）
581	Paclitaxel	33069-62-4	98%（HPLC）
582	Isoliquiritigenin	961-29-5	98%（HPLC）
583	D-(+)-Mannose	3458-28-4	98%（HPLC）
584	D-Mannitol	66-84-2	98%（HPLC）
585	Procyanidin B2	29106-49-8	98%（HPLC）
586	Topotecan Hydrochloride	119413-54-6	98%（HPLC）
587	10-Hydroxycamptothecin	19685-09-7	98%（HPLC)
588	Caffeine	58-08-2	98%（HPLC）
589	Protocatechuic Acid	99-50-3	98%（HPLC）
590	Ellagic acid hydrate	314041-08-2	97%（HPLC)
591	Phloroglucidol	491-45-2	98%（HPLC)
592	Floxuridine	50-91-9	98%（HPLC)
593	3-Amino-3-(3,4-dimethoxyphenyl)propionic acid	34841-09-3	98%（HPLC)
594	β-Caryophyllene	87-44-5	90%（GC）
595	Scutellarein	529-53-3	98%（HPLC）
596	Beta-Asarone	5273-86-9	98%（HPLC）
597	α-Asarone	2883-98-9	98%（HPLC）
598	Asiatic acid	464-92-6	98%（HPLC）
599	Astragalin	480-10-4	98%（HPLC）
600	D-(+)-Xylose	58-86-6	98%（HPLC)
601	Cytisine	485-35-8	98%（HPLC）
602	Isovitexin	38953-85-4	98%（HPLC）
603	Bakuchiol	10309-37-2	98%（HPLC）
604	Theobromine	83-67-0	98%（HPLC）
605	Epigallocatechin（EGC）	970-74-1	98%（HPLC）
606	D（+）Galactose	59-23-4	98%（HPLC)
607	Sodium new houttuyfonate	1847-58-1	98%（HPLC)
608	Palmitic acid	57-10-3	98%（HPLC）
609	Capric acid	334-48-5	98%（HPLC)
610	(+)-Longifolen	475-20-7	98%（HPLC)
611	5-Caffeoylquinic acid/Neochlorogenic acid	906-33-2	98%（HPLC）
612	4-Caffeoylquinic acid/ Cryptochlorogenic acid	905-99-7	98%（HPLC）
613	Schizandrol B	58546-54-6	98%（HPLC）
614	Glycitein	40957-83-3	98%（HPLC）
615	23-Hydroxybetulinic acid	85999-40-2	98%（HPLC）
616	Catechol	120-80-9	98%（HPLC）
617	Coniferylaldehydel	458-36-6	98%（HPLC)
618	Glycerite	1401-55-4	98%（HPLC）
619	L-Methionine	63-68-3	98%（HPLC)
620	Corydaline	518-69-4	98%（HPLC）
621	Curcumol	4871-97-0	98%（HPLC）
622	Saikosaponin C	20736-08-7	98%（HPLC）
623	Gracillin	19083-00-2	98%（HPLC）
624	Acidineorangegn	1934-20-9	70%（HPLC)
625	Vindoline, (-)-	2182-14-1	98%（HPLC）
626	Norcantharadine	29745-04-8	98%（HPLC）
627	Maltose	69-79-4	98%（HPLC）
628	Coumalic acid	500-05-0	98%（HPLC）
629	Ziyuglycoside II	35286-59-0	98%（HPLC）
630	β-Carotene	7235-40-7	98%（HPLC）
631	Nitrendipine	39562-70-4	98%（HPLC）
632	Catharanthine	2468-21-5	98%（HPLC）
633	Magnoflorine	2191-49-5，2141-09-5	98%（HPLC）
634	5'-Guanylic acid	85-32-5	98%（HPLC）
635	Mannitol	87-78-5	98%（HPLC）
636	Sophocarpine	145572-44-7	98%（HPLC）
637	Cinnamaldehyde	104-55-2	98%（HPLC）
638	Ginsenoside Rc	11021-14-0	98%（HPLC）
639	Allicin	539-86-6	97%（HPLC）
640	Stachydrine	471-87-4	98%（HPLC）
641	L-Rhamnopyranose	10030-85-0	98%（HPLC）
642	Thymol	89-83-8	98%（HPLC）
643	Dehydroepiandrosterone	53-43-0	98%（HPLC）
644	Vanillin	121-33-5	98%（HPLC）
645	Cinene	138-86-3	95%（HPLC）
646	D-glucuronate	6556-12-3	98%（HPLC)
647	alpha-(3,4-dihydroxyphenyl)lactic acid	22681-72-7	98%（HPLC)
648	Piceatannol, (E)-	10083-24-6	98%（HPLC）
649	Xanthotoxin; 8-Methoxypsoralen	298-81-7	98%（HPLC）
650	Glabridin	59870-68-7	98%（HPLC）
651	Galanthamine hydrobromide	1953-04-4	98%（HPLC）
652	Chelerythrine chloride	3895-92-9	98%（HPLC）
653	Tangeratin	481-53-8	98%（HPLC）
654	β-Eudesmol	473-15-4	95%（HPLC）
655	Carthamine	36338-96-2	95%（HPLC）
656	Theophylline	58-55-9	98%（HPLC）
657	Doxofylline	69975-86-6	98%（HPLC）
658	trans-methylferulate	2309-07-1	98%（HPLC）
659	Isovanillic Acid	645-08-9	98%（HPLC）
660	Crocetin	27876-94-4	98%（HPLC）
661	3-(Methylseleno)-L-alanine	26046-90-2	98%（HPLC）
662	Torasemide	56211-40-6	98%（HPLC）
663	Enrofloxacin	93106-60-6	98%（HPLC）
664	Ethacridibe lactate monohydrate	6402-23-9	98%（HPLC）
665	flubendazole	31430-15-6	98%（HPLC）
666	closantel	57808-65-8	98%（HPLC）
667	Dimethyl disulfide	624-92-0	98%（HPLC）
668	L-Carnitine inner salt	541-15-1	98%（HPLC）
669	Astragalus Polysacharin	89250-26-0	95%（HPLC）
670	Chuanxiongzine; Ligustrazine; Tetrapyrazine	1124-11-4	98%（HPLC）
671	p-Coumaric acid	501-98-4	98%（HPLC）
672	Simvastatin	79902-63-9	98%（HPLC）
673	Lutein	127-40-2	95%（HPLC）
674	Dihydrotanshinone I; 15,16-Dihydrotanshinone I	87205-99-0	98%（HPLC）
675	Proanthocyanidins	4852-22-6	95%（UV）
676	Vitamin B2	83-88-5	98%（HPLC）
677	Vitamin B1	59-43-8	98%（HPLC）
678	AtropineSulfat	5908-99-6	98%（HPLC）
679	L-Lysine	56-87-1	98%（HPLC）
680	Liquiritigenin	578-86-9	98%（HPLC）
681	Licochalcone A	58749-22-7	98%（HPLC）
682	Tabersonine	4429-63-4	97%（HPLC）
683	Dipotassium glycyrrhizinate	68797-35-3	98%（HPLC）
684	Diammonium glycyrrhizinate	79165-06-3	98%（HPLC）
685	Isoliquiritin	5041-81-6	98%（HPLC）
686	Glycyrrhetic acid stearyl	13832-70-7	98%（HPLC）
687	Cucurbitacin B	6199-67-3	98%（HPLC）
688	Aliazrin	72-48-0	98%（HPLC）
689	Tea Saponin	8047-15-2	98%（HPLC）
690	Echinocystic acid	510-30-5	98%（HPLC）
691	Veratric acid	93-07-2	98%（HPLC）
692	Veratryl alcohol	93-03-8	98%（HPLC）
693	Veratramine	60-70-8	98%（HPLC）
694	3-Hydroxycinnamic acid	14755-02-3	98%（HPLC）
695	p-Hydroxybenzaldehyde	123-08-0	98%（HPLC）
696	Bisdemethoxycurcumin	33171-05-0	98%（HPLC）
697	Anhydroicaritin	38226-86-7	98%（HPLC）
698	Icaritin	118525-40-9	98%（HPLC）
699	Artemisinin	63968-64-9	98%（HPLC）
700	Reserpine	50-55-5	98%（HPLC）
701	Myricetin	529-44-2	98%（HPLC）
702	Capsaicin, (6E)-	404-86-4	98%（HPLC）
703	Cinnamic acid	140-10-3	98%（HPLC）
704	Aloperine	56293-29-9	98%（HPLC）
705	Berberine	2086-83-1	98%（HPLC）
706	Phellodendrine	6873-13-8	98%（HPLC）
707	2-Methyl anthraquinone	84-54-8	98%（HPLC）
708	Scopolamine hydrobromide	114-49-8	98%（HPLC）
709	p-Hydroxy-cinnamic acid	7400-08-0	98%（HPLC）
710	L-Abrine	526-31-8	98%（HPLC）
711	Lycopene	502-65-8	95%（HPLC）
712	(+)-Gallocatechin	970-73-0	98%（HPLC）
713	Oleuropein	32619-42-4	98%（HPLC）
714	Oxyresveratrol	29700-22-9	98%（HPLC）
715	Cholic acid	81-25-4	98%（HPLC）
716	Dabigatran etexilate	211915-06-9	98%（HPLC）
717	trans-4-Methoxycinnamic acid	943-89-5	98%（GC）
718	Benzoic acid	65-85-0	98%（HPLC）
719	Emodin-8-glucoside；Emodin-8-O-β-D-glucopyranoside	23313-21-5	98%（HPLC）
720	Malic acid	6915-15-7	98%（HPLC）
721	Anhydrous citric acid	77-92-9	98%（HPLC）
722	D-Tartaric acid	147-71-7	98%（HPLC）
723	Sweroside	14215-86-2	98%（HPLC）
724	Levodopa	59-92-7	98%（HPLC）
725	Hydrocortisone	50-23-7	98%（HPLC）
726	Hematoxylin	517-28-2	98%（HPLC）
727	Juglone	481-39-0	98%（HPLC）
728	Harmine	442-51-3	98%（HPLC）
729	Yangonin	500-62-9	98%（HPLC）
730	Methyl gallate	99-24-1	98%（HPLC）
731	Cephalotaxine	24316-19-6	98%（HPLC）
732	Gibberellic acid	77-06-5	90%（HPLC）
733	Colchicine	64-86-8	98%（HPLC）
734	Bergapten	484-20-8	98%（HPLC）
735	Hordenine	539-15-1	98%（HPLC）
736	Epimedin A	110623-72-8	98%（HPLC）
737	Epimedin B	110623-73-9	98%（HPLC）
738	Icariside I	56725-99-6	98%（HPLC）
739	Sodium sulfite	7757-83-7	98%（HPLC）
740	Perillartine	30950-27-7	98%（HPLC）
741	Hippuric acid	495-69-2	98%（HPLC）
742	L-Pyroglutamic acid	98-79-3	98%（HPLC）
743	Elemicin	487-11-6	97%（HPLC）
744	Chelidamic acid monohydrate	199926-39-1	98%（HPLC）
745	Anethole trithione	532-11-6	98%（HPLC）
746	Syringic acid	530-57-4	98%（HPLC）
747	2,3,4,9-TETRAHYDRO-1H-BETA-CARBOLINE-3-CARBOXYLIC ACID	6052-68-2	97%（HPLC）
748	4'-Hydroxychalcone	2657-25-2	97%（HPLC）
749	Santonin	481-06-1	98%（HPLC）
750	(1S)-(-)-Camphanic acid	13429-83-9	98%（HPLC）
751	S-N-Boc-Piperidine-2-carboxylic acid	26250-84-0	98%（HPLC）
752	1-(Boc-amino)cyclopropanecarboxylic acid	88950-64-5	97%（HPLC）
753	N-Benzoylpiperidone	24686-78-0	98%（HPLC）
754	Carbazole	86-74-8	97%（HPLC）
755	Melatonine	73-31-4	98%（HPLC）
756	3-Coumarinamine	1635-31-0	97%（HPLC）
757	D-camphre	464-49-3	98%（HPLC）
758	Sesamol	533-31-3	98%（HPLC）
759	4-Hydroxycoumarin	1076-38-6	98%（HPLC）
760	Furfuryl acetate	623-17-6	98%（HPLC）
761	D-Menthol	15356-60-2	98%（HPLC）
762	Jasmone	488-10-8	98%（HPLC）
763	Cedrol	77-53-2	98%（HPLC）
764	Tropine	120-29-6	98%（HPLC）
765	Tropic acid	529-64-6	98%（HPLC）
766	6-Hydroxyflavanone	4250-77-5	98%（HPLC）
767	Myristicin Aldehyde	5780-07-4	98%（HPLC）
768	Xanthoxylin	90-24-4	98%（GC）
769	Bilirubin	635-65-4	98%（HPLC）
770	Nerolidol	7212-44-4	97%（HPLC）
771	Methyl 4-hydroxycinnamate	3943-97-3	98%（HPLC）
772	trans-Methyl 4-hydroxycinnamate	19367-38-5	98%（HPLC）
773	Hydrocoumarin	119-84-6	98%（HPLC）
774	DL-Proline	609-36-9	98%（HPLC）
775	Cytidine	65-46-3	98%（HPLC）
776	a-Arbutin	84380-01-8	98%（HPLC）
777	Ginkgolic acid 17:1	111047-30-4	95%（HPLC）
778	Forskolin	66575-29-9	98%（HPLC）
779	DL-α-Tocopherol	10191-41-0	98%（HPLC）
780	Lauric acid	143-07-7	98%（HPLC）
781	1,1-Diphenyl-2-picrylhydrazyl (DPPH)	1898-66-4	95%（HPLC）
782	Gammariza	11042-64-1	98%（HPLC）
783	Trimyristin	555-45-3	98%（HPLC)
784	DL-dihydrozeatin	14894-18-9	98%（HPLC）
785	Methyl 2-(1H-indol-3-yl)acetate	1912-33-0	98%（HPLC)
786	Indole-3-carboxaldehyde	487-89-8	98%（HPLC)
787	N6-(delta 2-Isopentenyl)-adenine	2365-40-4	98%（HPLC)
788	L-Asparagine	70-47-3	98%（HPLC）
789	Phenolphthalein	77-09-8	98%（HPLC）
790	Saccharin sodium dihydrate	6155-57-3	98%（HPLC）
791	Sulfadiazine	68-35-9	98%（HPLC）
792	Teprenone	6809-52-5	95%（HPLC）
793	Eriotartrazine	1934-21-0	85%（HPLC）
794	Myrcene	123-35-3	75%（HPLC）
795	Testosterone	58-22-0	98%（HPLC）
796	Estrone	53-16-7	98%（HPLC）
797	Octanoic acid	124-07-2	98%（HPLC）
798	Diammonium 2,2'-azino-bis(3-ethylbenzothiazoline-6-sulfonate	30931-67-0	98%（HPLC）
799	Boc-D-Glutamine	61348-28-5	98%（HPLC）
800	Quinidine	56-54-2	98%（HPLC）
801	Carnosol	5957-80-2	98%（HPLC）
802	Diphenhydramine Hydrochloride	147-24-0	98%（HPLC）
803	Garlic oil	8000-78-0	98%（HPLC）
804	Aminophylline	317-34-0	98%（HPLC）
805	Anthraquinone	84-65-1	98%（HPLC）
806	Syringaldehyde	134-96-3	98%（HPLC）
807	Angelica lactone	591-12-8	98%（HPLC）
808	(E)-3-(2-Methoxyphenyl)acrylaldehyde	60125-24-8	95%（HPLC）
809	Boc-D-Tryptophan	5241-64-5	98%（HPLC）
810	Uric acid	69-93-2	98%（HPLC）
811	Xanthone	90-47-1	98%（HPLC）
812	DL-Mandelic acid	90-64-2	98%（HPLC）
813	1-Aminocyclopropanecarboxylic acid	22059-21-8	98%（HPLC）
814	Guanidineacetic acid	352-97-6	98%（HPLC）
815	Vanillyl alcohol	498-00-0	98%（HPLC）
816	Vanillyl alcohol	498-00-0	98%（HPLC）
817	3,4-Dimethoxycinnamic acid	2316-26-9	98%（HPLC）
818	Piperonylic acid	94-53-1	98%（HPLC）
819	(+)-Dipentene	5989-27-5	98%(GC)
820	Ethyl 3,4-dihydroxybenzoate	3943-89-3	98%(GC)
821	4-Methoxycinnamic acid	830-09-1	98%（HPLC）
822	3,4,5-Trimethoxycinnamic acid	90-50-6	98%（HPLC）
823	1,4-Benzoquinone	106-51-4	98%（HPLC）
824	L(+)-Arabinose	87-72-9	98%（HPLC）
825	L(+)-Arabinose	87-72-9	98%（HPLC）
826	Benzil	134-81-6	98%（HPLC）
827	3,4-(Methylenedioxy)cinnamic acid	2373-80-0	98%（HPLC）
828	Isatin	91-56-5	98%（HPLC）
829	trans-Ferulic acid	537-98-4	98%（HPLC）
830	Acridanone	578-95-0	98%（HPLC）
831	1,4-Diphenoxybenzene	3061-36-7	98%（HPLC）
832	4-Hydroxybenzyl cyanide	14191-95-8	98%（HPLC）
833	NA	NA	80%（HPLC）
834	NA	NA	20%（HPLC）
835	Fluocinolone acetonide	67-73-2	98%（HPLC）
836	Nimodipine	66085-59-4	98%（HPLC）
837	Betanin	7659-95-2	NA
838	Carmine	1390-65-4	98%（HPLC）
839	Donepezil hydrochloride	110119-84-1	98%（HPLC）
840	Cyclic AMP	60-92-4	98%（HPLC）
841	D-Fructose 1,6-bisphosphate	488-69-7	98%（HPLC）
842	Methylprotodioscin	54522-52-0	98%（HPLC）
843	Rebaudioside A	58543-16-1	98%（HPLC）
844	Shikimic Acid	138-59-0	98%（HPLC）
845	Myristic acid	544-63-8	98%（HPLC）
846	4-Isopropyl-3-Methylphenol	3228-02-2	98%（HPLC）
847	Phenol	108-95-2	98%（GC）
848	Xanthosine	146-80-5	98%（HPLC）
849	Piperazine	110-85-0	97%（HPLC）
850	Rapamycin	53123-88-9	98%（HPLC）
851	Acarbose	56180-94-0	98%（HPLC）
852	N-Acetylneuraminic acid	131-48-6	98%（HPLC）
853	Ocimene	13877-91-3	90%（GC）
854	Lobeline hydrochloride	134-63-4	98%（HPLC）
855	Cyclophosphamide monohydrate	6055-19-2	98%（HPLC）
856	2-Naphthoxyacetic acid	120-23-0	98%（HPLC）
857	Chlorpheniramine maleate	113-92-8	98%（HPLC）
858	Tenofovir	147127-20-6	98%（HPLC）
859	Marbofloxacin	115550-35-1	99%（HPLC)
860	Ofloxacin	82419-36-1	98%（HPLC)
861	Phenytoin sodium	630-93-3	98%（HPLC)
862	Eriodictyol	552-58-9	98%（HPLC）
863	Methylstearat	112-61-8	97%（GC）
864	Malonic acid	141-82-2	98%（GC）
865	D(+)-Galactosamine hydrochloride	1772-03-8	98%（HPLC)
866	Coix seed oil	液体	鉴别
867	Acetylsalicylic acid	50-78-2	98%（HPLC）
868	Eurycomanone	84633-29-4	98%（HPLC）
869	Fraxin	524-30-1	98%（HPLC）
870	Hydroxytyrosol	10597-60-1	98%（HPLC）
871	Lappaconitine	32854-75-4	98%（HPLC）
872	Anethole, trans-	4180-23-8	98%（GC）
873	Ruscogenin	472-11-7	98%（HPLC）
874	Docetaxel	114977-28-5	98%（HPLC）
875	Kaempferide	491-54-3	98%（HPLC）
876	Maslinic acid	4373-41-5	98%（HPLC）
877	Butylphthalide	6066-49-5	98%（HPLC）
878	Salvianolic acid A	96574-01-5	98%（HPLC）
879	L-Arginine hydrochloride	1119-34-2	95%（HPLC）
880	Phenyl benzoate	93-99-2	98%（HPLC）
881	Metronidazole	443-48-1	98%（HPLC）
882	Pipemidic acid	51940-44-4	98%（HPLC）
883	Cimetidine	51481-61-9	98%（HPLC）
884	Stugeron	298-57-7	98%（HPLC）
885	Diisobutyl phthalate	84-69-5	98%（HPLC）
886	Bis(2-ethylhexyl) Phthalate	117-81-7	98%（HPLC）
887	Monoethyl fumaric acid	2459-05-4	97.0%(GC)
888	Cyclosporin A	59865-13-3	98%（HPLC）
889	Madecassic acid	18449-41-7	98%（HPLC）
890	Ginsenoside CK	39262-14-1	98%（HPLC）
891	Sieboldin	18777-73-6	98%（HPLC）
892	Picrocrocin	138-55-6	98%（HPLC）
893	Pratensein 7-O-glucopyranoside	36191-03-4	98%（HPLC）
894	7,4＇-Di-O-methylapigenin	5128-44-9	98%（HPLC）
895	14-Deoxy-11,12-didehydroandrographolide	42895-58-9	98%（HPLC）
896	13-Oxyingenol dodecanoat	54706-70-6	98%（HPLC）
897	Arglabin	84692-91-1	98%（HPLC）
898	Bevirimat	174022-42-5	98%（HPLC）
899	Violanthin	40581-17-7	95%（HPLC）
900	Rhodojaponin II	26116-89-2	98%（HPLC）
901	Rhodojaponin III	26342-66-5	98%（HPLC）
902	Mogrol	88930-15-8	98%（HPLC）
903	iridin	491-74-7	98%（HPLC）
904	Cephaeline	483-17-0	95%（HPLC）
905	Brevilin A	16503-32-5	98%（HPLC）
906	Incensole acetate	34701-53-6	98%（HPLC）
907	Genistein 8-C-glucoside	66026-80-0	98%（HPLC）
908	Picropodophyllotoxon	477-48-5	98%（HPLC）
909	Coumestrol	479-13-0	98%（HPLC）
910	Phillygenin	487-39-8	98%（HPLC）
911	Pristimerin	1258-84-0	98%（HPLC）
912	Dicentrine	28832-07-7	98%（HPLC）
913	Ketoconazole	65277-42-1	98%（HPLC）
914	Picropodophyllotoxin	17434-18-3	98%（HPLC）
915	Luteone	41743-56-0	98%（HPLC）
916	Evodine	6989-38-4	98%（HPLC）
917	Pomiferin	572-03-2	98%（HPLC）
918	Cycloheterophyllin	36545-53-6	96%（HPLC）
919	Lupalbigenin	76754-24-0	98%（HPLC）
920	Chamaejasmin B	89595-71-1	98%（HPLC）
921	Icariside E5	126176-79-2	98%（HPLC）
922	Hastatoside	50816-24-5	98%（HPLC）
923	Psoralenoside	905954-17-8	98%（HPLC）
924	Isopsoralenoside	905954-18-9	98%（HPLC）
925	Fructo-oligosaccharide DP8 / GF7	62512-21-4	98%（HPLC）
926	Armepavine	524-20-9	98%（HPLC）
927	Dimethyl lithospermate B	875313-64-7	98%（HPLC）
928	Nepetin	520-11-6	98%（HPLC）
929	Retusin	1245-15-4	98%（HPLC）
930	Euscaphic acid	53155-25-2	98%（HPLC）
931	Sclareol	515-03-7	98%（HPLC）
932	6-Demethoxytangeretin	6601-66-7	98%（HPLC）
933	3'-Methoxydaidzein	21913-98-4	98%（HPLC）
934	Quercetin 3-O-robibioside	52525-35-6	93%（HPLC）
935	Liriodendrin	573-44-4	98%（HPLC）
936	Tenuifoliside B	139726-36-6	98%（HPLC）
937	Sibiricaxanthone A	241125-76-8	98%（HPLC）
938	Glomeratose A	202471-84-9	98%（HPLC）
939	Polygalaxanthone XI	857859-82-6	98%（HPLC）
940	Neolancerin	117221-65-5	98%（HPLC）
941	7Z-Trifostigmanoside I	1018898-17-3	98%（HPLC）
942	7,22,25-Stigmastatrienol	14485-48-4	98%（HPLC）
943	Arillanin A	154287-47-5	98%（HPLC）
944	1,7-Dihydroxy-2,3-methylenedioxyxanthone	183210-63-1	80%（HPLC）
945	MoMordicoside C	1041631-93-9	98%（HPLC）
946	Momordicoside L	81348-83-6	98%（HPLC）
947	Momordicoside P	1011726-62-7	98%（HPLC）
948	Momordicoside K	81348-84-7	98%（HPLC）
949	Momordicoside F1	81348-81-4	98%（HPLC）
950	Momordicoside I aglycone	81910-41-0	98%（HPLC）
951	Charantadiol A	1220890-23-2	98%（HPLC）
952	Momordicine I	91590-76-0	98%（HPLC）
953	Clerosterol glucoside	123621-00-1	93%（HPLC）
954	5,19-Epoxy-25-methoxycucurbita-6,23-dien-3-ol	81910-39-6	98%（HPLC）
955	Calenduloside E	26020-14-4	95%（HPLC）
956	Hederacolchiside A1	106577-39-3	98%（HPLC）
957	3-O-acetyloleanolic acid	4339-72-4	95%（HPLC）
958	2,3,24-Trihydroxyolean-12-en-28-oic acid	150821-16-2	98%（HPLC）
959	oleanolic acid-3-O-β-D-glucopyranosyl (1→2)-α-L-arabinopyranoside	60213-69-6	98%（HPLC）
960	Oleanolic acid-3-O-beta-D-xylopyranoside	61617-29-6	98%（HPLC）
961	Palmitoleic acid	373-49-9	98%（GC）
962	Nonanoic acid	112-05-0	98%（HPLC）
963	Chrysoeriol-7-O-glucoside	19993-32-9	98%（HPLC）
964	Quercetin-3-o-rutinose	949926-49-2	98%（HPLC）
965	Bryonolol	39765-50-9	98%（HPLC）
966	Diacerein	13739-02-1	98%（HPLC）
967	Irisolidone	2345-17-7	98%（HPLC）
968	miltirone	27210-57-7	98%（HPLC）
969	Osmundacetone	123694-03-1	95%（HPLC）
970	Periplocymarin	32476-67-8	98%（HPLC）
971	Manninotriose	13382-86-0	98%（HPLC）
972	3-deoxysappanchalcone	112408-67-0	98%（HPLC）
973	Morellic acid	5304-71-2	98%（HPLC）
974	Maytansinoid AP-3	66547-09-9	98%（HPLC）
975	Equisporol	489-35-0	98%（HPLC）
976	Lapachol	84-79-7	98%（HPLC）
977	Bulleyaconitine A	79592-91-9	98%（HPLC）
978	Quercetin 3-O-β-D-xylopyranoside	549-32-6	98%（HPLC）
979	Procyanidin B1	20315-25-7	98%（HPLC）
980	Procyanidin B4	29106-51-2	98%（HPLC）
981	Aristolochic acid D	17413-38-6	98%（HPLC）
982	Protogracillin	54848-30-5	98%（HPLC）
983	1,3,5,8-Tetrahydroxyxanthone; Desmethylbellidifolin	2980-32-7	98%（HPLC）
984	Scopolamine	51-34-3	98%（HPLC）
985	Chrysophanol-1-O-β-D-glucoside	4839-60-5	98%（HPLC）
986	Theaflavin	4670-05-7	98%（HPLC）
987	Kavain	500-64-1	98%（HPLC）
988	Epiberberine	6873-09-2	98%（HPLC）
989	(-)-Gallocatechin 3-O-gallate	4233-96-9	98%（HPLC）
990	Mulberroside A	102841-42-9	98%（HPLC）
991	Cannabidiol	13956-29-1	98%（HPLC）
992	Total saponins from Astragali radix	NA	90%（HPLC）
993	Total flavonoids from Astragali radix	NA	90%（HPLC）
994	Theaflavin-3-Gallate	30462-34-1	98%（HPLC）
995	Methysticin	495-85-2	98%（HPLC）
996	Bavachin	19879-32-4	98%（HPLC）
997	Officinalisinin I	57944-18-0	98%（HPLC）
998	Emodin 1-glucoside	38840-23-2	98%（HPLC）
999	Buddlejasaponin IVb	152580-79-5	98%（HPLC）
1000	Garcinone C	76996-27-5	98%（HPLC）
1001	Bayogenin 3-O-β-D-glucopyranoside	104513-86-2	98%（HPLC）
1002	Bernardioside A	121368-52-3	98%（HPLC）
1003	Cucurbitacin E	18444-66-1	98%（HPLC）
1004	Bayogenin	6989-24-8	98%（HPLC）
1005	SipeiMine-3β-D-glucoside	32685-93-1	98%（HPLC）
1006	Glycyrrhisoflavone	116709-70-7	98%（HPLC）
1007	Glabrene	60008-03-9	97%（HPLC）
1008	Isoliquiritin apioside	120926-46-7	98%（HPLC）
1009	Liquiritin apioside	74639-14-8	98%（HPLC）
1010	Neoisoliquiritin	7014-39-3	98%（HPLC）
1011	Licoisoflavone A	66056-19-7	98%（HPLC）
1012	Licochalcone B	58749-23-8	98%（HPLC）
1013	Neoliquiritin	5088-75-5	98%（HPLC）
1014	Echinatin	34221-41-5	98%（HPLC）
1015	Glycyrol	23013-84-5	98%（HPLC）
1016	Semilicoisoflavone B	129280-33-7	98%（HPLC）
1017	Licochalcone C	144506-14-9	98%（HPLC）
1018	Glabrone	60008-02-8	98%（HPLC）
1019	Glabrol	59870-65-4	98%（HPLC）
1020	2-Propen-1-one, 3-(3,4-dihydroxy-2-Methoxyphenyl)-1-[4-hydroxy-3-(3-Methyl-2-butenyl)p henyl]-, (E)-	144506-15-0	98%（HPLC）
1021	Glabrolide	10401-33-9	98%（HPLC）
1022	Licoflavone A	61153-77-3	98%（HPLC）
1023	Licoflavone B	91433-17-9	98%（HPLC）
1024	Licoflavone C	72357-31-4	98%（HPLC）
1025	Licochalcone E	864232-34-8	98%（HPLC）
1026	甘草异黄烷I	NA	98%（HPLC）
1027	Saikosaponin H	91990-63-5	98%（HPLC）
1028	Saikosaponin F	62687-63-2	98%（HPLC）
1029	Saikosaponin B1	58558-08-0	98%（HPLC）
1030	Saikosaponin B2	58316-41-9	98%（HPLC）
1031	Saikogenin D	5573-16-0	98%（HPLC）
1032	Saikosaponin I	103629-71-6	98%（HPLC）
1033	Saikosaponin G	99365-19-2	98%（HPLC）
1034	Saikosaponin B4	58558-09-1	98%（HPLC）
1035	Saikosaponin B3	58316-42-0	98%（HPLC）
1036	11(α)-methoxysaikosaponin F	104109-37-7	98%（HPLC）
1037	Saikosaponin E	64340-44-9	98%（HPLC）
1038	GinsenosideRo	34367-04-9	98%（HPLC）
1039	Falcarinol	21852-80-2	98%（HPLC）
1040	Ginsenoside Ra3	90985-77-6	98%（HPLC）
1041	Ginsenoside Mb	88105-29-7	98%（HPLC）
1042	20(R)-Ginsenoside Rh1	80952-71-2	98%（HPLC）
1043	20(R)-Protopanaxadiol	7755-01-3	98%（HPLC）
1044	20(R)-Protopanaxatriol	1453-93-6	98%（HPLC）
1045	Protopanaxatriol, 20S-	34080-08-5	98%（HPLC）
1046	20(S)-Protopanaxadiol	30636-90-9	98%（HPLC）
1047	Panasenoside;Kaempferol-3-O-glucosyl（1-2）galactoside	31512-06-8	98%（HPLC）
1048	Ginsenoside Rg5	186763-78-0	98%（HPLC）
1049	20(R)-Ginsenoside Rh2	112246-15-8	98%（HPLC）
1050	Ginsenoside Rh3	105558-26-7	98%（HPLC）
1051	5,6-dehydrogensenoside Rd	1268459-68-2	98%（HPLC）
1052	Ginsenoside Rk1 (Rk1:Rz1=5:2)	494753-69-4	98%（HPLC）
1053	Ginsenoside F1	53963-43-2	98%（HPLC）
1054	Ginsenoside F2	62025-49-4	98%（HPLC）
1055	Ginsenoside Rh1; 20(s)-Ginsenoside Rh1	63223-86-9	98%（HPLC）
1056	Pseudoginsenoside RT5	98474-78-3	98%（HPLC）
1057	Pseudoginsenoside RT1	98474-74-9	98%（HPLC）
1058	Ginsenoside F3	62025-50-7	98%（HPLC）
1059	Ginsenoside Rk3	364779-15-7	98%（HPLC）
1060	Ginsenoside RK2	364779-14-6	98%（HPLC）
1061	Ginsenoside F4;20(E)-Ginsenoside F4	181225-33-2	98%（HPLC）
1062	Ginsenoside Rh4	174721-08-5	98%（HPLC）
1063	Ginsenoside Rg6	147419-93-0	90%（HPLC）
1064	Pseudoginsenoside Rh2	1370264-16-6	98%（HPLC）
1065	Ginsenoside Rh8	343780-69-8	98%（HPLC）
1066	Gensenoside Rh7	343780-68-7	98%（HPLC）
1067	Ginsenoside Rd2	83480-64-2	98%（HPLC）
1068	Ginsenoside Ra2	83459-42-1	98%（HPLC）
1069	Ginsenoside Ra1	83459-41-0	98%（HPLC）
1070	Mulberrin	62949-79-5	98%（HPLC）
1071	Vina-ginsenoside R8	156042-22-7	98%（HPLC）
1072	vina-ginsenoside R4	156009-80-2	98%（HPLC）
1073	Salvianolic acid C	115841-09-3	98%（HPLC）
1074	Lithospermic acid	28831-65-4	98%（HPLC）
1075	Gomisin N	69176-52-9	98%（HPLC）
1076	Gomisin J	66280-25-9	98%（HPLC）
1077	Eriotartrazine	1934-21-0	95%（HPLC）
1078	Myrcene	123-35-3	95%（HPLC）
1079	Chrysophanol-8-O-beta-D-glucopyranoside	13241-28-6	98%（HPLC）
1080	Atractylon	6989-21-5	98%（HPLC）
1081	Nepodin	3785-24-8	98%（HPLC）
1082	Geraniin	60976-49-0	98%（HPLC）
1083	Senecionine	130-01-8	98%（HPLC）
1084	Dihydrokavain	587-63-3	98%（HPLC）
1085	β-Eudesmol	473-15-4	95%（HPLC）
1086	procyanidolc1	37064-30-5	98%（HPLC）
1087	Isoliquiritin apioside	120926-46-7	98%（HPLC）
1088	Vicenin-1	35927-38-9	98%（HPLC）
1089	Vicenin-3	59914-91-9	98%（HPLC）
1090	Beta-Boswellic acid	631-69-6	97%（HPLC）
1091	Morusinol	62949-93-3	98%（HPLC）
1092	Asiaticoside B	125265-68-1	98%（HPLC）
1093	Platycoside G1	849758-42-5	98%（HPLC）
1094	Platycodin D3	67884-03-1	98%（HPLC）
1095	Solasodine	126-17-0	98%（HPLC）
1096	Schisantherin B	58546-55-7	98%（HPLC）
1097	1,5-Dicaffeoylquinic acid	19870-46-3	98%（HPLC）
1098	Cynaropicrin	35730-78-0	97%（HPLC)
1099	Dauricine	524-17-4	98%（HPLC）
1100	Alflatoxinb1	1162-65-8	98%（HPLC）
1101	Guaijaverin	22255-13-6	98%（HPLC）
1102	Evolitrine	523-66-0	98%（HPLC）
1103	Jaranol	3301-49-3	98%（HPLC）
1104	Bellidifolin	2798-25-6	98%（HPLC）
1105	Campesterol	474-62-4	97%（HPLC）
1106	Ilexsaponin A	108524-93-2	95%（HPLC）
1107	Dehydropachymic acid	77012-31-8	98%（HPLC）
1108	Hypericin	548-04-9	98%（HPLC）
1109	Bilobetin	521-32-4	98%（HPLC）
1110	Swertisin	6991-10-2	98%（HPLC）
1111	Eleutheroside A	474-58-8	98%（HPLC）
1112	Notoginsenoside Ft1	155683-00-4	98%（HPLC）
1113	Ginsenoside F5	189513-26-6	98%（HPLC）
1114	Parishin C	174972-80-6	98%（HPLC）
1115	Pachymic acid	29070-92-6	98%（HPLC）
1116	Pomolic acid β-D-glucopyranosyl ester	83725-24-0	94%（HPLC）
1117	Withaferin A	5119-48-2	98%（HPLC）
1118	Bornyl acetate	76-49-3	98%（GC）
1119	Syringaresinol	1177-14-6	98%（HPLC）
1120	Ethoxychelerythrin	79559-55-0	98%（HPLC）
1121	Nitidine chloride	13063-04-2	98%（HPLC）
1122	Hupehenine	98243-57-3	98%（HPLC）
1123	(+)-Borneol	464-43-7	98%（HPLC）
1124	L(-)-Borneol	464-45-9	97%（HPLC）
1125	Bullatine A	1354-84-3	98%（HPLC）
1126	Toddalolactone	483-90-9	98%（HPLC）
1127	Homoharringtonine	26833-87-4	98%（HPLC）
1128	Heteroclitin D	140369-76-2	98%（HPLC）
1129	Fargesin	31008-19-2	98%（HPLC）
1130	Shionone	10376-48-4	98%（HPLC）
1131	Qingyangshengenin	84745-94-8	98%（HPLC）
1132	Polyphyllin I	50773-41-6	98%（HPLC）
1133	Polyphyllin II	50773-42-7	98%（HPLC）
1134	Polyphyllin VI	55916-51-3	98%（HPLC）
1135	Polyphyllin VII	68124-04-9	98%（HPLC）
1136	Picroside IV	211567-04-3	98%（HPLC）
1137	Wilforlide A	84104-71-2	98%（HPLC）
1138	Gypenoside XLIX	94987-08-3	98%（HPLC）
1139	Cochinchinenin C	956103-79-0	98%（HPLC）
1140	Astragaloside I	84680-75-1	98%（HPLC）
1141	Astragaloside I	84680-75-1	98%（HPLC）
1142	Astragaloside II	84676-89-1	98%（HPLC）
1143	Astragaloside III	84687-42-3	98%（HPLC）
1144	Senkyunolide A	63038-10-8	98%（HPLC）
1145	Ecdysone	3604-87-3	98%（HPLC）
1146	Loganetin	29748-10-5	98%（HPLC）
1147	Menthone	89-80-5	98%（HPLC）
1148	Ginkgoneolic acid	20261-38-5	98%（HPLC）
1149	Vitexin 2''-O-rhamnoside	64820-99-1	98%（HPLC）
1150	Epifriedelanol	16844-71-6	98%（HPLC）
1151	Dihydrocapsaicin	19408-84-5	98%（HPLC）
1152	Liensinine perchlorate	2385-63-9	98%（HPLC）
1153	Raddeanin A	89412-79-3	98%（HPLC）
1154	sec-O-Glucosylhamaudol	80681-44-3	98%（HPLC）
1155	1,3-Dicaffeoylquinic acid	30964-13-7	98%（HPLC）
1156	Chelerythrine	34316-15-9	98%（HPLC）
1157	Momordin Ic	96990-18-0	98%（HPLC）
1158	Rupestonicacid	115473-63-7	98%（HPLC）
1159	Corynoline	18797-79-0	98%（HPLC）
1160	2'-O-Galloylhyperin	53209-27-1	98%（HPLC）
1161	Dehydroandrographolidesuccinate	786593-06-4	98%（HPLC）
1162	Difractaic acid	436-32-8	98%（HPLC）
1163	Gossypol	303-45-7	98%（HPLC）
1164	Angelicide	92935-94-9	98%（HPLC）
1165	Stachyose	54261-98-2	98%（HPLC）
1166	Biochanin A	491-80-5	98%（HPLC）
1167	Kaempferitrin	482-38-2	98%（HPLC）
1168	20(R)-Ginsenoside Rg2	80952-72-3	98%（HPLC）
1169	Magnolignan A	93673-81-5	98%（HPLC）
1170	6-alpha-Hydroxygeniposide；Deacetylasperulosidic acid methyl ester	52613-28-2	98%（HPLC）
1171	Tiliroside	20316-62-5	98%（HPLC）
1172	Crotonoside	1818-71-9	98%（HPLC）
1173	Complanatoside A	116183-66-5	98%（HPLC）
1174	Agarotetrol	69809-22-9	98%（HPLC）
1175	Cyasterone	17086-76-9	98%（HPLC）
1176	Neotuberostemonine	143120-46-1	98%（HPLC）
1177	Dehydrocorydaline	83218-34-2	98%（HPLC）
1178	Dimethylacrylalkannin, β,β-	5162-01-6	98%（HPLC）
1179	Chikusetsusaponin IVa; Glucopyranosiduronic acid	51415-02-2	98%（HPLC）
1180	Dendrobine	2115-91-5	98%（HPLC）
1181	7,4'-Dihydroxyflavone	2196-14-7	98%（HPLC）
1182	Notoginsenoside R2	80418-25-3	98%（HPLC）
1183	Notoginsenoside Fd	80321-63-7	98%（HPLC）
1184	Artemisic acid	80286-58-4	98%（HPLC）
1185	Falcarindiol	225110-25-8	98%（HPLC）
1186	Forsythoside E	93675-88-8	98%（HPLC）
1187	Forsythoside H	1178974-85-0	98%（HPLC）
1188	Forsythoside B	81525-13-5	98%（HPLC）
1189	Forsythoside I	1177581-50-8	98%（HPLC）
1190	Isoforsythiaside	1357910-26-9	98%（HPLC）
1191	Poliumoside	94079-81-9	98%（HPLC）
1192	Pectolinarigenin	520-12-7	98%（HPLC）
1193	Isoschaftoside	52012-29-0	98%（HPLC）
1194	Aristolochic acid II	475-80-9	98%（HPLC）
1195	Chelidonine	476-32-4	98%（HPLC）
1196	Juncusol	62023-90-9	98%（HPLC）
1197	Dehydroeffusol	137319-34-7	98%（HPLC）
1198	Flavonoids Duyiwei	64421-28-9	98%（HPLC）
1199	Cornuside	131189-57-6	98%（HPLC）
1200	Militarine	58139-23-4	98%（HPLC）
1201	Polygalaxanthone III	162857-78-5	98%（HPLC）
1202	Baohuoside II	55395-07-8	98%（HPLC）
1203	3-Acetyl-11-keto-beta-boswellic Acid	67416-61-9	98%（HPLC）
1204	[8]-Gingerol	23513-08-8	98%（HPLC）
1205	Enmein	3776-39-4	98%（HPLC）
1206	Liriope muscari baily saponins C	130551-41-6	98%（HPLC）
1207	Vicenin-2	23666-13-9	98%（HPLC）
1208	Calceolarioside B	105471-98-5	98%（HPLC）
1209	Luteolin 7-O-glucuronide	29741-10-4	95%（HPLC）
1210	Isorhynchophylline	6859-01-4	98%（HPLC）
1211	Darutoside	59219-65-7	98%（HPLC）
1212	Darutigenol	5940-00-1	95%（HPLC）
1213	Norkanugin	490-31-3	98%（HPLC）
1214	Febrifugine	24159-07-7	98%（HPLC）
1215	Naringenin-7-O-glucoside	529-55-5	98%（HPLC）
1216	Glucotropaeolin	5115-71-9	98%（HPLC）
1217	Praeruptorin E	78478-28-1	98%（HPLC）
1218	Dihydromethysticin	19902-91-1	95%（HPLC）
1219	Hydroxypuerarin, 3'-	117060-54-5	98%（HPLC）
1220	Peimisine	19773-24-1	98%（HPLC）
1221	Peimisine hydrochloride	900498-44-4	98%（HPLC）
1222	Hapepunine	68422-01-5	98%（HPLC）
1223	Tubeimoside II	115810-12-3	98%（HPLC）
1224	Tubeimoside III	115810-13-4	98%（HPLC）
1225	Virgaureagenin G	22338-71-2	98%（HPLC）
1226	Isoverticine	23496-43-7	98%（HPLC）
1227	Anemarsaponin E	136565-73-6	98%（HPLC）
1228	Kaempherol 3-O-β-glucuronide Kaempferol 3-O-β-D-glucuronide	22688-78-4	98%（HPLC）
1229	Euphorbia Factor L2	218916-51-9	98%（HPLC）
1230	Euphorbia Factor L3	218916-52-0	98%（HPLC）
1231	O-β-D-Glucosylgentiopicroside, 6'-	115713-06-9	98%（HPLC）
1232	Tirucallol	514-46-5	95%（HPLC）
1233	Ponicidin	52617-37-5	98%（HPLC）
1234	6-Hydroxyquercetin	90-18-6	98%（HPLC）
1235	Quercetagetin-7-O-glucoside	548-75-4	98%（HPLC）
1236	Hydroxy-alpha-Sanshool	83883-10-7	98%（HPLC）
1237	Hydroxy-beta-Sanshool	97465-69-5	98%（HPLC）
1238	Hydroxy-Gamma-Sanshool	78886-66-5	98%（HPLC）
1239	Hydroxy-Epsilon-Sanshool	252193-26-3	98%（HPLC）
1240	Hydroxy-Gamma-Isosanshool	127514-62-9	98%（HPLC）
1241	Linoleamide, N-benzyl-	18286-71-0	98%（HPLC）
1242	N-benzyl-9Z,12Z,15Z-octadecatrienamide	883715-18-2	98%（HPLC）
1243	Hexadecanamide, N-benzyl-	74058-71-2	98%（HPLC）
1244	13-Oxo-9E,11E-octadecadienoic acid	29623-29-8	96%（HPLC）
1245	N-Benzyloleamide	883715-21-7	98%（HPLC）
1246	(9Z,12Z)-N-(3-Methoxybenzyl)octadeca-9,12-dienamide	883715-22-8	98%（HPLC）
1247	N-(3-Methoxybenzyl)palmitamide	NA	98%（HPLC）
1248	N-(3-Methoxybenzyl)oleamide	NA	98%（HPLC）
1249	N-Benzylstearamide	5327-45-7	97%（HPLC）
1250	Lobetyolinin	142451-48-7	98%（HPLC）
1251	Crenulatin	63026-02-8	98%（HPLC）
1252	Deacetylasperulosidic acid	14259-55-3	98%（HPLC）
1253	Deacetylasperulosidic acid	14259-55-3	98%（HPLC）
1254	1F-fructofuranosylnystose	59432-60-9	98%（HPLC）
1255	1,1,1,1-Kestohexose	62512-19-0	98%（HPLC）
1256	Fructoheptasaccharide	62512-20-3	98%（HPLC）
1257	4''-methyloxy-Genistin	950910-16-4	98%（HPLC）
1258	lariciresinol	27003-73-2	98%（HPLC）
1259	20(R)-Notoginsenoside R2	948046-15-9	98%（HPLC）
1260	Gypenoside XLVI	94705-70-1	98%（HPLC）
1261	Senkyunolide I	94596-28-8	98%（HPLC）
1262	Senkyunolide H	94596-27-7	98%（HPLC）
1263	7-O-Ethylmorroniside	945721-10-8	98%（HPLC）
1264	Ophiopogonin D	945619-74-9	98%（HPLC）
1265	Propofol	2078-54-8	98%（HPLC）
1266	2-Acetylacteoside	94492-24-7	98%（HPLC）
1267	Angelic anhudride	94487-74-8	98%（HPLC）
1268	Isomucronulatol 7-O-glucoside	94367-43-8	98%（HPLC）
1269	Methylnissolin-3-O-glucoside	94367-42-7	98%（HPLC）
1270	Piceatannol 3'-O-glucoside	94356-26-0	98%（HPLC）
1271	Rhapontigenin 3'-O-glucoside	94356-22-6	98%（HPLC）
1272	Bullatine B	466-26-2	98%（HPLC）
1273	Polyporenic acid C	465-18-9	97%（HPLC）
1274	Gamabufotalin	465-11-2	98%（HPLC）
1275	4β,12-dihydroxyguaian-6,10-diene	461644-90-6	98%（HPLC）
1276	Sulforafan	4478-93-7	98%（HPLC）
1277	Hydroxylongispinogenin, 23-	42483-24-9	98%（HPLC）
1278	Procyanidin A2	41743-41-3	98%（HPLC）
1279	Arctigenin 4'-O-β-gentiobioside	41682-24-0	98%（HPLC）
1280	1-(3,4-dimethoxyphenyl)-2-(4-allly-2,6-dimethoxyphenoxy)propan-1-ol	41535-95-9	98%（HPLC）
1281	Isorhamnetin 3-sophoroside-7-rhamnoside	41328-75-0	98%（HPLC）
1282	6-Methoxykaempferol 3-O-rutinoside	403861-33-6	98%（HPLC）
1283	Sinigrin	3952-98-5	98%（HPLC）
1284	Oxyresveratrol 2-O-β-D-glucopyranoside	392274-22-5	98%（HPLC）
1285	Epimedoside A	39012-04-9	98%（HPLC）
1286	Oxypaeoniflorin	39011-91-1	98%（HPLC）
1287	Cucurbitacin D	3877-86-9	98%（HPLC）
1288	Benzoylpaeoniflorin	38642-49-8	98%（HPLC）
1289	3-O-β-D-Glucopyranosylplatycodigenin	38337-25-6	98%（HPLC）
1290	Juglalin	99882-10-7	98%（HPLC）
1291	Silybin B	142797-34-0	98%（HPLC）
1292	Isosilybin	72581-71-6	98%（HPLC）
1293	Silydianin	29782-68-1	98%（HPLC）
1294	Isosilybin A	142796-21-2	98%（HPLC）
1295	Isosilybin B	142796-22-3	98%（HPLC）
1296	6''-O-Acetylglycitin	134859-96-4	98%（HPLC）
1297	Soyasaponin Bb	51330-27-9	98%（HPLC）
1298	Deslanoside	17598-65-1	98%（HPLC）
1299	Apigenin 7-O-(2G-rhamnosyl)gentiobioside	174284-20-9	98%（HPLC）
1300	6-Hydroxyrubiadin	87686-86-0	98%（HPLC）
1301	Alizarin 1-methyl ether	6170-06-5	98%（HPLC）
1302	Columbin	546-97-4	98%（HPLC）
1303	Isocolumbin	471-54-5	98%（HPLC）
1304	Pashanone	42438-78-8	98%（HPLC）
1305	Isobavachromene	56083-03-5	90%（HPLC）
1306	Bavachalcone	28448-85-3	98%（HPLC）
1307	Isobavachin	31524-62-6	98%（HPLC）
1308	Isovitexin 2''-O-β-glucoside	60767-80-8	95%（HPLC）
1309	Jujuboside D	194851-84-8	98%（HPLC）
1310	Feruloylspinosin, 6'''-	77690-92-7	98%（HPLC）
1311	5-Hydroxy-6,7-dimethoxy-2-phenyl-4H-chromen-4-one	740-33-0	98%（HPLC）
1312	Soyasapogenol A	508-01-0	98%（HPLC）
1313	Soyasapogenol B	595-15-3	98%（HPLC）
1314	Byakangelicin	19573-01-4	98%（HPLC）
1315	Oxypeucedanin hydrate	2643-85-8	98%（HPLC）
1316	Angenomalin	18199-64-9	98%（HPLC）
1317	Byakangelicin	482-25-7	98%（HPLC）
1318	Biacangelicol; Byakangelicol	26091-79-2	98%（HPLC）
1319	Oxypeucedanin	737-52-0	98%（HPLC）
1320	Xanthatin	26791-73-1	98%（HPLC）
1321	3-O-Caffeoylquinic acid methyl ester	123483-19-2	98%（HPLC）
1322	Trilobatin	4192-90-9	98%（HPLC）
1323	delphinidin-3-glucoside	6906-38-3	98%（HPLC）
1324	Jatrorrhizine	3621-38-3	98%（HPLC）
1325	5,7,3'-Trihydroxy-6,4',5'-trimethoxyflavone	78417-26-2	98%（HPLC）
1326	Corynoxine B	17391-18-3	98%（HPLC）
1327	3-Acetylaconitine	77181-26-1	98%（HPLC）
1328	Aconine	509-20-6	98%（HPLC）
1329	Ganoderic acid A	81907-62-2	98%（HPLC）
1330	Morusin	62596-29-6	98%（HPLC）
1331	Platycoside E	237068-41-6	98%（HPLC）
1332	Deoxyandrographolide	79233-15-1	98%（HPLC）
1333	Dihydrosanquinarine	3606-45-9	98%（HPLC）
1334	Sagittatosdie B	118525-36-3	95%（HPLC）
1335	Marmesin	13849-08-6	98%（HPLC）
1336	Desacetylcinobufagin	4026-95-3	98%（HPLC）
1337	Sakuranetin	2957-21-3	98%（HPLC）
1338	Berberrubine	15401-69-1	98%（HPLC）
1339	Isoastragaloside I	84676-88-0	98%（HPLC）
1340	Hispidulin	1447-88-7	98%（HPLC）
1341	Citric acid monohydrate	77-92-9	98%（HPLC）
1342	Polygalasaponin F	882664-74-6	98%（HPLC）
1343	Roburic acid	6812-81-3	98%（HPLC）
1344	Liensinine	2586-96-1	98%（HPLC）
1345	14-Deoxy-11,12-didehydroandrographiside	141973-41-3	98%（HPLC）
1346	Plantagoside	78708-33-5	98%（HPLC）
1347	2''-O-Rhamnosylicariside II	135293-13-9	98%（HPLC）
1348	14-Deoxyandrographolide	4176-97-0	98%（HPLC）
1349	Rehmannioside D	81720-08-3	98%（HPLC）
1350	RhMannioside C	81720-07-2	94%（HPLC）
1351	Rehmannioside A	81720-05-0	98%（HPLC）
1352	Neomangiferin	64809-67-2	98%（HPLC）
1353	Isoviolanthin	40788-84-9	95%（HPLC）
1354	Salvianolic acid D	142998-47-8	98%（HPLC）
1355	Rhodojaponin V	37720-86-8	98%（HPLC）
1356	Arjunolic acid	465-00-9	98%（HPLC）
1357	Chebulinic acid	18942-26-2	98%（HPLC）
1358	Phorbol-12-Myristate-13-Acetate	16561-29-8	98%（HPLC）
1359	Methylophiopogonanone B	74805-91-7	98%（HPLC）
1360	Methylophiopogonanone A	74805-92-8	98%（HPLC）
1361	Ophiopogonin D'	65604-80-0	98%（HPLC）
1362	Glucoraphanin	21414-41-5	95%（HPLC）
1363	Secoxyloganin	58822-47-2	98%（HPLC）
1364	Parishin A	62499-28-9	98%（HPLC）
1365	Parishin E	952068-57-4	98%（HPLC）
1366	Ganoderic acid D2	97653-94-6	95%（HPLC）
1367	12-O-乙酰基灵芝酸θ	NA	96%（HPLC）
1368	Ganoderenic acid E	110241-23-1	98%（HPLC）
1369	Ganodericacid C	95311-97-0	98%（HPLC）
1370	23S-hydroxyl-11,15-dioxo-ganoderic acid DM	1085273-49-9	98%（HPLC）
1371	Acetyl-β-boswellic acid	5968-70-7	97%（HPLC）
1372	Alpha-Boswellic acid	471-66-9	98%（HPLC）
1373	Tsugaric acid A	174391-64-1	98%（HPLC）
1374	Furanodienon	24268-41-5	98%（HPLC）
1375	6''-O-Malonylgenistin	51011-05-3	98%（HPLC）
1376	Corylin	53947-92-5	98%（HPLC）
1377	α-Spinasterol	481-18-5	98%（HPLC）
1378	(+)-Piresil-4-O-β-D-glucopyraside	69251-96-3	98%（HPLC）
1379	(+)-gomisin M2	82425-45-4	97%（HPLC）
1380	Pogostone	23800-56-8	98%（HPLC）
1381	Ailanthone	981-15-7	98%（HPLC）
1382	Absynthine	1362-42-1	98%（HPLC）
1383	Micheliolide	68370-47-8	98%（HPLC）
1384	Gelsenicine	82354-38-9	98%（HPLC）
1385	Koumine	1358-76-5	98%（HPLC）
1386	Gelsemine	509-15-9	98%（HPLC）
1387	11-Hydroxygelsenicine	1195760-68-9	98%（HPLC）
1388	Tormentic acid	13850-16-3	90%（HPLC）
1389	Lappaconitine hydrobromide	97792-45-5	98%（HPLC）
1390	Lappaconitine hydrobromide	97792-45-5	98%（HPLC）
1391	Pseudolaric Acid A-O-beta-D-glucopyranoside	98891-44-2	98%（HPLC）
1392	Pseudolaric acid B-O-beta-D-glucopyranoside	98891-41-9	98%（HPLC）
1393	Obacunone	751-03-1	98%（HPLC）
1394	Naringenin chalcone	73692-50-9	98%（HPLC）
1395	Leonuride	52949-83-4	98%（HPLC）
1396	Melittoside	19467-03-9	98%（HPLC）
1397	Rehmapicroside	104056-82-8	95%（HPLC）
1398	Purpureaside C	108648-07-3	98%（HPLC）
1399	Dehydro-23-O-Acetylalisol B	NA	95%（HPLC）
1400	Alisol A 24-acetate	18674-16-3	98%（HPLC）
1401	Alismoxide	87701-68-6	98%（HPLC）
1402	Alisol A	19885-10-0	98%（HPLC）
1403	Alisol C-23-acetate	26575-93-9	98%（HPLC）
1404	Nicotinamide	98-92-0	98%（HPLC）
1405	25-Methoxyalisol A	155801-00-6	98%（HPLC）
1406	Alisol F 24-acetate	443683-76-9	98%（HPLC）
1407	Alismol	87827-55-2	96%（HPLC）
1408	16-Oxoalisol A	124515-98-6	98%（HPLC）
1409	Alisol C	30489-27-1	98%（HPLC）
1410	16,23-Oxidoalisol B	169326-06-1	98%（HPLC）
1411	Apiopaeonoside	100291-86-9	98%（HPLC）
1412	Paeonolide	72520-92-4	98%（HPLC）
1413	Mudanpioside C	172760-03-1	98%（HPLC）
1414	Hydroquinone	123-31-9	98%（HPLC）
1415	Cimiracemoside D	290821-39-5	98%（HPLC）
1416	Acetylcimigenol 3-O-α-L-arabinopyranside	402513-88-6	98%（HPLC）
1417	Batatasin III	56684-87-8	98%（HPLC）
1418	Eburicoic acid	560-66-7	98%（HPLC）
1419	Norwogonin	4443-09-8	98%（HPLC）
1420	Swertiajaponin	6980-25-2	98%（HPLC）
1421	Thonningianin A	271579-11-4	98%（HPLC）
1422	Tetrahydricheilanthifolinium	38691-95-1	98%（HPLC）
1423	Worenine	38763-29-0	98%（HPLC）
1424	Sesamoside	117479-87-5	98%（HPLC）
1425	Corytuberine	517-56-6	98%（HPLC）
1426	Stylopine	84-39-9	98%（HPLC）
1427	7-Epi-10-deacetyl-taxol	78454-17-8	97%（HPLC）
1428	Engeletin	572-31-6	98%（HPLC）
1429	Sanggenone D	81422-93-7	95%（HPLC）
1430	Sanggenon C	80651-76-9	98%（HPLC）
1431	kuwanon G	75629-19-5	98%（HPLC）
1432	Morin	480-16-0	98%（HPLC）
1433	Mussaenoside	64421-27-8	97%（HPLC）
1434	Kuwanon H	76472-87-2	98%（HPLC）
1435	Kuwanon E	68401-05-8	98%（HPLC）
1436	Sanggenol L	329319-20-2	98%（HPLC）
1437	Mulberroside F	193483-95-3	98%（HPLC）
1438	Mulberrofuran G	87085-00-5	95%（HPLC）
1439	Moracin P	102841-46-3	98%（HPLC）
1440	Moracin O	123702-97-6	98%（HPLC）
1441	Mulberrofuran Q	101383-35-1	98%（HPLC）
1442	Sanggenone H	86450-80-8	98%（HPLC）
1443	Kuwanon A	62949-77-3	95%（HPLC）
1444	Mulberroside C	102841-43-0	95%（HPLC）
1445	Leucoside	27661-51-4	98%（HPLC）
1446	Triptonide	38647-11-9	98%（HPLC）
1447	Wilfordine	37239-51-3	98%（HPLC）
1448	Wilfortrine	37239-48-8	98%（HPLC）
1449	Wilforine	11088-09-8	98%（HPLC）
1450	Wilforgine	37239-47-7	98%（HPLC）
1451	Wilfornine A	345954-00-9	95%（HPLC）
1452	Tripdiolide	38647-10-8	98%（HPLC）
1453	Triptophenolide	74285-86-2	98%（HPLC）
1454	Tripterifordin	139122-81-9	98%（HPLC）
1455	Caftaric acid	67879-58-7	98%（HPLC）
1456	Epoxymicheliolide	1343403-10-0	98%（HPLC）
1457	Apigenin-7-O-glucuronide	29741-09-1	98%（HPLC）
1458	Ginkgetin	481-46-9	98%（HPLC）
1459	Isocorydine	475-67-2	98%（HPLC）
1460	Telocinobufagin	472-26-4	98%（HPLC）
1461	Jolkinolide B	37905-08-1	98%（HPLC）
1462	Oroxyloside; Oroxylin A 7-glucuronide	36948-76-2	98%（HPLC）
1463	Guaiacin	36531-08-5	98%（HPLC）
1464	Paprazine	36417-86-4	98%（HPLC）
1465	Clemaphenol A	362606-60-8	98%（HPLC）
1466	Genistein 7,4'-di-O-β-D-glucopyranoside	36190-98-4	98%（HPLC）
1467	Octahydrocurcumin	36062-07-4	96%（HPLC）
1468	Tetrahydrocurcumin	36062-04-1	98%（HPLC）
1469	Onjisaponin B	35906-36-6	98%（HPLC）
1470	Chrysin 7-glucuronide	35775-49-6	98%（HPLC）
1471	Kurarinone	34981-26-5	98%（HPLC）
1472	Raddeanoside 20	335354-79-5	98%（HPLC）
1473	Fucoxanthin	3351-86-8	98%（HPLC）
1474	Euonymine	33458-82-1	98%（HPLC）
1475	Aloe-emodin-8-O-beta-D-glucopyranoside	33037-46-6	98%（HPLC）
1476	O-Methylaloeresin A, 7-	329361-25-3	98%（HPLC）
1477	Isofebrifugin	32434-44-9	98%（HPLC）
1478	Sanguinarium chloride；Sanguinarine	5578-73-4	98%（HPLC）
1479	Kaempferol-3-O-(2"-O-β-D- glucopyl)-β-D–rutinoside	55696-58-7	98%（HPLC）
1480	Deltonin	55659-75-1	98%（HPLC）
1481	Chimonanthine	5545-89-1	98%（HPLC）
1482	Kaempferol 3-sophoroside-7-glucoside	55136-76-0	98%（HPLC）
1483	Voacamine	3371-85-5	98%（HPLC）
1484	Dicumarol	66-76-2	98%（HPLC）
1485	Sarracenin	59653-37-1	98%（HPLC）
1486	6-Acetonyldihydrosanguinarine	37687-34-6	98%（HPLC）
1487	Ethoxysanguinarine	28342-31-6	98%（HPLC）
1488	Norchelerythrine	6900-99-8	97%（HPLC）
1489	Scoulerin	6451-73-6	98%（HPLC）
1490	Tetrahydrocolumbamine	483-34-1	98%（HPLC）
1491	Tomatidine	77-59-8	98%（HPLC）
1492	Dendrophenol	67884-30-4	95%（HPLC）
1493	Isovitexin 2''-O-arabinoside	53382-71-1	98%（HPLC）
1494	Kaempferol 3-neohesperidoside	32602-81-6	98%（HPLC）
1495	Isorhamnetin-3-O-galactoside	6743-92-6	98%（HPLC）
1496	Oleanonic acid	17990-42-0	98%（HPLC）
1497	Ceanothic acid	21302-79-4	98%（HPLC）
1498	P-coumaryl alcohol	3690-05-9	98%（HPLC）
1499	Coniferyl alcohol	458-35-5	98%（HPLC）
1500	Columbianetin	1147-29-1	98%（HPLC）
1501	(5S,6S,7S,8R)-8-Chloro-5,6,7-trihydroxy-2-phenylethyl-5,6,7,8-tetrahydro-4H-chromen-4-one	626236-06-4	98%（HPLC）
1502	6,7-Dimethoxy-2-phenethylchromone	84294-87-1	98%（HPLC）
1503	6-Hydroxy-2-(2-phenylethyl)chromone	84294-90-6	98%（HPLC）
1504	Orcinol glucoside	21082-33-7	98%（HPLC）
1505	Borneol 7-O-[β-D-apiofuranosyl-(1→6)]-β-D-glucopyranoside	88700-35-0	98%（HPLC）
1506	4-((2-ethylidene-4-hydroxy-6-methylhept-5-en-1-yl)oxy)-bergaptol	NA	98%（HPLC）
1507	3,3'-Di-O-methylellagic acid 4'-glucoside	51803-68-0	98%（HPLC）
1508	Ophiopogonin C	65586-25-6	98%（HPLC）
1509	Vinblastine sulfate	143-67-9	97%（HPLC）
1510	Nomilin	1063-77-0	98%（HPLC）
1511	Sedanolide	6415-59-4	98%（HPLC）
1512	Isomangiferin	24699-16-9	98%（HPLC）
1513	Alpha-Mangostin	6147-11-1	98%（HPLC）
1514	Beta-mangostin	20931-37-7	98%（HPLC）
1515	Mangostin, γ-	31271-07-5	98%（HPLC）
1516	3-isomangostin	19275-46-8	98%（HPLC）
1517	Fuscaxanthone C	15404-76-9	98%（HPLC）
1518	lirinidine	54383-28-7	98%（HPLC）
1519	KukoaMine B	164991-67-7	98%（HPLC）
1520	Kukoamine A	75288-96-9	98%（HPLC）
1521	Torachrysone 8-O-glucoside	64032-49-1	98%（HPLC）
1522	Asarinin	133-04-0	98%（HPLC）
1523	Pteryxin	13161-75-6	98%（HPLC）
1524	gartanin	33390-42-0	98%（HPLC）
1525	1,3,6-Tri-O-galloyl-beta-D-glucose	18483-17-5	95%（HPLC）
1526	Nothofagin	11023-94-2	98%（HPLC）
1527	Artemitin	479-90-3	98%（HPLC）
1528	Prunetin	552-59-0	98%（HPLC）
1529	Salvianolic acid F	158732-59-3	98%（HPLC）
1530	Momordicoside A	75801-95-5	95%（HPLC）
1531	Verbenalin;Verbenaloside; Cornin	548-37-8	98%（HPLC）
1532	Hypaphorine	487-58-1	98%（HPLC）
1533	Quercetin-7-O-glucoside	491-50-9	98%（HPLC）
1534	Myricetin 3-O-galactoside	15648-86-9	98%（HPLC）
1535	Cimicifugol	3779-59-7	98%（HPLC）
1536	deoxypodophyllotoxin	19186-35-7	98%（HPLC）
1537	Onjisaponin F	79103-90-5	98%（HPLC）
1538	Onjisaponin D	66663-91-0	98%（HPLC）
1539	Onjisaponin Z	1078708-72-1	98%（HPLC）
1540	Tenuifoliside A	139726-35-5	98%（HPLC）
1541	sibiricaxanthone B	241125-81-5	98%（HPLC）
1542	Sibiricose A5	107912-97-0	98%（HPLC）
1543	Sibiricose A6	241125-75-7	96%（HPLC）
1544	Tenuifoliside C	139726-37-7	98%（HPLC）
1545	7-O-Methylmangiferin	31002-12-7	98%（HPLC）
1546	3-Feruloyl-1-Sinapoyl sucrose	98942-06-4	95%（HPLC）
1547	1,2,3,7-tetraMethoxyxanthone	22804-52-0	95%（HPLC）
1548	gentianin	437-50-3	98%（HPLC）
1549	Momordicoside G	81371-54-2	98%（HPLC）
1550	Isorhamnetin-3-O-beta-D-Glucoside	5041-82-7	98%（HPLC）
1551	3,29-O-dibenzoyloxykarounidiol	389122-01-4	98%（HPLC）
1552	Sophoraflavonoloside	19895-95-5	98%（HPLC）
1553	Diosmetin-7-O-beta-D-glucopyranoside	20126-59-4	98%（HPLC）
1554	Tricin	520-32-1	98%（HPLC）
1555	Avicularin	572-30-5	98%（HPLC）
1556	Poncirin	14941-08-3	98%（HPLC）
1557	Neonuezhenide	96382-91-1	95%（HPLC）
1558	Berbamine	478-61-5	98%（HPLC）
1559	Acetylshikonin	24502-78-1	98%（HPLC）
1560	TanshinoneIIB	17397-93-2	97%（HPLC）
1561	Taraxera-14-ene-3-one	514-07-8	98%（HPLC）
1562	Cistanoside A	93236-42-1	95%（HPLC）
1563	lanostcrol	79-63-0	95%（HPLC）
1564	Taraxeryl acetate	2189-80-2	98%（HPLC）
1565	Carboxyatractyloside	77228-71-8	98%（HPLC）
1566	Jionoside A1	120444-60-2	95%（HPLC）
1567	Jionoside B1	120406-37-3	97%（HPLC）
1568	Aloeresin	30861-27-9	98%（HPLC）
1569	Santalol	11031-45-1	98%（HPLC）
1570	Rubiadin-1-methyl ether	7460-43-7	98%（HPLC）
1571	Rubiadin-1-methyl ether	7460-43-7	95%（HPLC）
1572	Caudatin	38395-02-7	98%（HPLC）
1573	Nordihydrocapsaicin	28789-35-7	98%（HPLC）
1574	Neocurdione	108944-67-8	98%（HPLC）
1575	Curzerene	17910-09-7	90%（GC）
1576	Nortanshinone	97399-70-7	98%（HPLC）
1577	Myristicin	607-91-0	98%（HPLC）
1578	2-hydroxychavicol	1126-61-0	98%（HPLC）
1579	schinifoline	80554-58-1	98%（HPLC）
1580	Flavokawain A	37951-13-6	98%（HPLC）
1581	Flavokawain B	1775-97-9	98%（HPLC）
1582	Flavokawain C	37308-75-1	98%（HPLC）
1583	Brusatol	14907-98-3	98%（HPLC）
1584	Bruceine A	25514-31-2	95%（HPLC）
1585	Bruceine E	21586-90-3	98%（HPLC）
1586	Psoralidin	18642-23-4	98%（HPLC）
1587	Guggulsterone E&Z	95975-55-6	98%（HPLC）
1588	Ajugasterone C	23044-80-6	98%（HPLC）
1589	Talatisamine	20501-56-8	98%（HPLC）
1590	Mesaconine	6792-09-2	98%（HPLC）
1591	Neoastilbin	54081-47-9	98%（HPLC）
1592	Epibrassinolide	72962-43-7	98%（HPLC）
1593	Laurolitsine	5890-18-6	98%（HPLC）
1594	Medicagenic acid	599-07-5	98%（HPLC）
1595	deltaline	6836-11-9	98%（HPLC）
1596	25R-Inokosterone	19682-38-3	95%（HPLC）
1597	Rutaevin	33237-37-5	90%（HPLC）
1598	1-Hydroxyrutaecarpine	53600-24-1	97%（HPLC）
1599	7β-Hydroxyrutaecarpine	163815-35-8	97%（HPLC）
1600	3-O-Methylquercetin	1486-70-0	98%（HPLC）
1601	Aromadedrin	480-20-6	98%（HPLC）
1602	roemerine	548-08-3	98%（HPLC）
1603	N-Nornuciferine	4846-19-9	98%（HPLC）
1604	anonaine	1862-41-5	98%（HPLC）
1605	Iiriodenine	475-75-2	96%（HPLC）
1606	Agrimol B	55576-66-4	98%（HPLC）
1607	Alliin	556-27-4	98%（HPLC）
1608	Taccalonolide AJ	1349904-82-0	98%（HPLC）
1609	Taccalonolide A	108885-68-3	98%（HPLC）
1610	Theaflavin 3,3'-digallate	30462-35-2	98%（HPLC）
1611	Theaflavin-3'-gallate	28543-07-9	98%（HPLC）
1612	Obtusin	70588-05-5	98%（HPLC）
1613	Glucoaurantio-obtusin	129025-96-3	98%（HPLC）
1614	γ-Fagarine	524-15-2	98%（HPLC）
1615	Asperulosidic acid	25368-11-0	98%（HPLC）
1616	Rubichloric acid	14259-45-1	98%（HPLC）
1617	N-trans-Feruloyltyramine	66648-43-9	98%（HPLC）
1618	Yamogenin	512-06-1	98%（HPLC）
1619	Dehydroevodiaminehydrochloride	111664-82-5	98%（HPLC）
1620	Evodol	22318-10-1	98%（HPLC）
1621	L-Nicotine	54-11-5	98%（HPLC）
1622	Dencichin	5302-45-4	98%（HPLC）
1623	Araloside A	7518-22-1	98%（HPLC）
1624	Methyl rosmarinate	99353-00-1	98%（HPLC）
1625	Kushenol A	99217-63-7	98%（HPLC）
1626	D-Trehalose	99-20-7	98%（HPLC）
1627	Kushenol I	99119-69-4	98%（HPLC）
1628	Cyanidin-3,5-O-diglucoside	2611-67-8	97%（HPLC）
1629	Ganoderic Acid G	98665-22-6	98%（HPLC）
1630	Ganoderic acid I	98665-20-4	98%（HPLC）
1631	Lucidenic acid E	98665-17-9	98%（HPLC）
1632	Ganoderic Acid F	98665-14-6	97%（HPLC）
1633	Schisandrone	98619-25-1	97%（HPLC）
1634	Isokurarinone	97938-31-3	98%（HPLC）
1635	Kushenol F	97938-30-2	98%（HPLC）
1636	Picfeltarraenin IA	97230-47-2	98%（HPLC）
1637	secoisolariciresinol	29388-59-8	98%（HPLC）
1638	Picfeltarraenin IB	97230-46-1	99%（HPLC）
1639	Maoecrystal A	96850-30-5	98%（HPLC）
1640	methyl(gypsogenin-3-O-β-D-glucopyranoside)uronate	96553-02-5	98%（HPLC）
1641	Lucidenic acid C	95311-96-9	98%（HPLC）
1642	Lucidenic acid B	95311-95-8	98%（HPLC）
1643	Kajiichigoside F1	95298-47-8	96%（HPLC）
1644	Isosinomenina	477-57-6	97%（HPLC）
1645	Herpetone	951677-22-8	95%（HPLC）
1646	Sappanchalcone	94344-54-4	98%（HPLC）
1647	neo-gambogic acid	93772-31-7	98%（HPLC）
1648	Egg yolk phosphatidylcholines	93685-90-6	98%（HPLC）
1649	Peonidin-3-O-glucoside	6906-39-4	98%（HPLC）
1650	Skimmin	93-39-0	98%（HPLC）
1651	Isoeugenol acetate	93-29-8	98%（GC）
1652	Kaempferol 3-sophoroside-7-rhamnoside	93098-79-4	95%（HPLC）
1653	6-Methylcoumarin	92-48-8	98%（HPLC）
1654	4'-methoxypuerarin	92117-94-7	98%（HPLC）
1655	5,7,4’-Trihydroxy-8-methylflavanone	916917-28-7	98%（HPLC）
1656	Clematiunicinoside E	916649-92-8	98%（HPLC）
1657	Clematomandshurica saponin B	916649-91-7	95%（HPLC）
1658	Zingiberennewsaponin	91653-50-8	98%（HPLC）
1659	Acanthopanaxoside B	915792-03-9	98%（HPLC）
1660	Lucyoside B	91174-19-5	98%（HPLC）
1661	Mogroside IV	89590-95-4	98%（HPLC）
1662	Odoratisol A	891182-93-7	98%（HPLC）
1663	Dipsanoside B	889678-64-2	95%（HPLC）
1664	Dipsanoside A	889678-62-0	98%（HPLC）
1665	Mogroside III A1	88901-42-2	98%（HPLC）
1666	Mogroside IVa	88901-41-1	98%（HPLC）
1667	Holostyligone, (-)-	887501-28-2	98%（HPLC）
1668	Chrysin 7-O-β-gentiobioside	88640-89-5	98%（HPLC）
1669	Isoastragaloside II	86764-11-6	98%（HPLC）
1670	2"-O-beta-L-galactopyranosylorientin; Orientin-2''-O-β-L-galactoside; 2"-O-β-L-Galorientin	861691-37-4	98%（HPLC）
1671	Dehydrolucidenic acid A, 20(21)-	852936-69-7	98%（HPLC）
1672	(-)-EGCG-3''-O-Me	83104-87-4	98%（HPLC）
1673	Isokadsuranin	82467-52-5	98%（HPLC）
1674	Lancerin	81991-99-3	98%（HPLC）
1675	Clovin	81970-00-5	98%（HPLC）
1676	Ganoderic Acid B	81907-61-1	98%（HPLC）
1677	Acanthoside B	7374-79-0	98%（HPLC）
1678	Chicanin	78919-28-5	98%（HPLC）
1679	Clematichinenoside AR	761425-93-8	98%（HPLC）
1680	Effusol	73166-28-6	98%（HPLC）
1681	Epigomisin O	73036-31-4	98%（HPLC）
1682	Gomisin O	72960-22-6	98%（HPLC）
1683	Benzoyloxypaeoniflorin	72896-40-3	95%（HPLC）
1684	Praeruptorin C	72463-77-5	98%（HPLC）
1685	Sylvestroside I	71431-22-6	98%（HPLC）
1686	Yunaconitine	70578-24-4	98%（HPLC）
1687	Dehydroeburicoic acid	6879-05-6	98%（HPLC）
1688	Trifolirhizin	6807-83-6	98%（HPLC）
1689	Apigenin 6-C-α-L-arabinopyranosyl-8-C-β-D-xylopyranoside	677021-30-6	98%（HPLC）
1690	Esculentoside H	66656-92-6	98%（HPLC）
1691	Octopamine, N-p-coumaroyl-	66648-45-1	98%（HPLC）
1692	Octopamine, N-feruloyl-	66648-44-0	98%（HPLC）
1693	Meso-dihydroguaiaretic acid	66322-34-7	97%（HPLC）
1694	Angeloylgomisin H	66056-22-2	98%（HPLC）
1695	Gomisin H	66056-20-0	98%（HPLC）
1696	Punicalagin	65995-63-3	98%（HPLC）
1697	Tetrahydroalstonine	6474-90-4	98%（HPLC）
1698	Rebaudioside D	63279-13-0	98%（HPLC）
1699	Neoprzewaquinone A	630057-39-5	98%（HPLC）
1700	Griffonilide	61371-55-9	98%（HPLC）
1701	Quercetin 3-O-β-D-glucose-7-O-β-D-gentiobioside	60778-02-1	98%（HPLC）
1702	Cucurbitacin A	6040-19-3	98%（HPLC）
1703	Dimethylfraxetin; Di-O-methylfraxetin	6035-49-0	98%（HPLC）
1704	Vindolinine	5980-02-9	97%（HPLC）
1705	Calycanthine	595-05-1	98%（HPLC）
1706	Decursin	5928-25-6	98%（HPLC）
1707	Vitexin 2''-O-p-coumarate	59282-55-2	98%（HPLC）
1708	Cephaelin Hydrochloride	5853-29-2	98%（HPLC）
1709	Notoginsenoside S	575446-95-6	95%（HPLC）
1710	Vincristine	57-22-7	95%（HPLC）
1711	Pseudohypericin	55954-61-5	98%（HPLC）
1712	Luteolin-3'-D-glucuronide	53527-42-7	98%（HPLC）
1713	Vaccarin	53452-16-7	98%（HPLC）
1714	Scopoloside	531-44-2	98%（HPLC）
1715	Androsin; glucoacetovanillone	531-28-2	98%（HPLC）
1716	Tetramethylcurcumin	52328-97-9	98%（HPLC）
1717	Shikonin	517-89-5	98%（HPLC）
1718	Isocorynoxeine	51014-29-0	98%（HPLC）
1719	Songorine	509-24-0	98%（HPLC）
1720	Arteannuin B	50906-56-4	98%（HPLC）
1721	Ganoderic acid LM2	508182-41-0	98%（HPLC）
1722	Marmesinin	495-30-7	98%（HPLC）
1723	Auraptene	495-02-3	98%（HPLC）
1724	Guaiazulene	489-84-9	98%（HPLC）
1725	Thermopsine	486-90-8	98%（HPLC）
1726	N-Methylcytisine	486-86-2	98%（HPLC）
1727	Bergaptol	486-60-2	98%（HPLC）
1728	Aristolochic acid C	4849-90-5	98%（HPLC）
1729	Decylic acid vanillylamide	31078-36-1	98%（HPLC）
1730	Isoolivil	3064-05-9	98%（HPLC）
1731	Arenobufagin 3-hemisuberate	30219-16-0	98%（HPLC）
1732	Desoxyrhaponticin	30197-14-9	98%（HPLC）
1733	Robinin	301-19-9	98%（HPLC）
1734	Sophorabioside	2945-88-2	98%（HPLC）
1735	Genipin 1-gentiobioside	29307-60-6	98%（HPLC）
1736	Dehydrotrametenolic acid	29220-16-4	98%（HPLC）
1737	Eupteleasaponin I	290809-29-9	98%（HPLC）
1738	Aloin B	28371-16-6	98%（HPLC）
1739	Gardenin B	2798-20-1	98%（HPLC）
1740	Kurarinone, 2'-O-methyl-	270249-38-2	98%（HPLC）
1741	Sweroside, 6'-O-β-D-apiofuranosyl-	266678-59-5	98%（HPLC）
1742	Aescin B	26339-90-2	98%（HPLC）
1743	Peritassine A	262601-67-2	98%（HPLC）
1744	Linderene	26146-27-0	98%（HPLC）
1745	ligustroflavone	260413-62-5	98%（HPLC）
1746	Hyponine D	259823-31-9	85%（HPLC）
1747	Phellopterin	2543-94-4	98%（HPLC）
1748	Gardenoside	24512-62-7	98%（HPLC）
1749	Sanguinarine	2447-54-3	98%（HPLC）
1750	Procyanidin B3	23567-23-9	98%（HPLC）
1751	Swertianolin	23445-00-3	98%（HPLC）
1752	Tectorigenin 7-O-xylosylglucoside	231288-19-0	98%（HPLC）
1753	Sinensetin	2306-27-6	98%（HPLC）
1754	Eurycomalactone	23062-24-0	90%（HPLC）
1755	Ginkgolic acid 15:1	22910-60-7	98%（HPLC）
1756	Hyponine E	226975-99-1	95%（HPLC）
1757	Gymnemagenin	22467-07-8	98%（HPLC）
1758	Platycodigenin	22327-82-8	98%（HPLC）
1759	Kaempferol 3-O-gentiobioside	22149-35-5	98%（HPLC）
1760	Vincetoxicoside B	22007-72-3	95%（HPLC）
1761	Aescin D	219944-46-4	98%（HPLC）
1762	Aescin C	219944-39-5	98%（HPLC）
1763	5-O-Demethylnobiletin	2174-59-6	98%（HPLC）
1764	Sophoflavescenol	216450-65-6	98%（HPLC）
1765	(+)-Balanophonin	215319-47-4	98%（HPLC）
1766	26-Deoxycimicifugoside	214146-75-5	98%（HPLC）
1767	Nudicaucin A	211815-97-3	98%（HPLC）
1768	Nudicaucin B	211557-36-7	98%（HPLC）
1769	Corylifolinin	20784-50-3	98%（HPLC）
1770	Vincristine Sulfate	2068-78-2	98%（HPLC）
1771	Pinocembrin 7-O-(3''-galloyl-4'',6''-(S)-hexahydroxydiphenoyl)-β-D-glucose	205370-59-8	98%（HPLC）
1772	Homodihydrocapsaicin I	20279-06-5	98%（HPLC）
1773	Rotundic acid	20137-37-5	95%（HPLC）
1774	1αH,5αH-guaia-6-ene-4β,10β-diol	2013537-81-8	95%（HPLC）
1775	Gymnestrogenin	19942-02-0	98%（HPLC）
1776	Chamigrenal	19912-84-6	98%（HPLC）
1777	(2RS)-Lotaustralin	1973415-50-7	98%（HPLC）
1778	Stigmasterol glucoside	19716-26-8	98%（HPLC）
1779	Salvigenin	19103-54-9	98%（HPLC）
1780	Brevifolincarboxylic acid	18490-95-4	98%（HPLC）
1781	Picfeltarraenin IV	184288-35-5	98%（HPLC）
1782	Fabiatrin	18309-73-4	98%（HPLC）
1783	Jaceosidin	18085-97-7	98%（HPLC）
1784	Ganoderlactone D	1801934-15-5	98%（HPLC）
1785	Quercetin 3-O-glucoside-7-O-rhamnoside	18016-58-5	98%（HPLC）
1786	Terrestrosin D	179464-23-4	98%（HPLC）
1787	rel-(8R,8'R)-dimethyl-(7S,7'R)-bis(3,4-methylenedioxyphenyl)tetrahydro-furan	178740-32-4	98%（HPLC）
1788	6,7,4'-Trihydroxyisoflavone	17817-31-1	98%（HPLC）
1789	Clematichinenoside C	177912-24-2	98%（HPLC）
1790	16α-Hydroxytrametenolic acid	176390-68-4	98%（HPLC）
1791	16α-Hydroxydehydrotrametenolic acid	176390-66-2	98%（HPLC）
1792	Isorhamnetin 3-glucoside-7-rhamnoside	17331-71-4	98%（HPLC）
1793	3β,7β,15β-trihydroxy-11-oxo-lanosta-8-en-24→20 lactone	1694587-15-9	98%（HPLC）
1794	Jolkinolide A	37905-07-0	98%（HPLC）
1795	Peonidin-3,5-diglucoside	132-37-6	90%（HPLC）
1796	Pelargonidin 3-glucoside	18466-51-8	98%（HPLC）
1797	Pelargonidin 3,5-di-β-D-glucoside	17334-58-6	90%（HPLC）
1798	Malvidin-3,5-O-diglucoside	16727-30-3	95%（HPLC）
1799	peonidin	134-01-0	97%（HPLC）
1800	Quivic acid 3-O-beta-D-glucoside	79955-41-2	93%（HPLC）
1801	Quinovic acid 3-O-(6-deoxyglucoside) 28-O-glucosyl ester	124727-10-2	98%（HPLC）
1802	Actein	18642-44-9	98%（HPLC）
1803	(+)-Cassythicine	5890-28-8	98%（HPLC）
1804	8-Epidiosbulbin E acetate	91095-48-6	98%（HPLC）
1805	4'-Hydroxywogonin	57096-02-3	98%（HPLC）
1806	Artocarpin	7608-44-8	98%（HPLC）
1807	(±)-2-Hydroxy-1-Methoxyaporphine	33770-27-3	98%（HPLC）
1808	Lysicamine	15444-20-9	98%（HPLC）
1809	Danshexinkun A	65907-75-7	98%（HPLC）
1810	Cratoxylone	149155-01-1	96%（HPLC）
1811	8-desoxygartanin	33390-41-9	98%（HPLC）
1812	Cowaxanthone B	212842-64-3	97%（HPLC）
1813	Flemiphilippinin A	140366-64-9	96%（HPLC）
1814	decarine	54354-62-0	97%（HPLC）
1815	8-O-Ethylyunaconitine	110011-77-3	98%（HPLC）
1816	Pennogenin	507-89-1	98%（HPLC）
1817	medicarpin	32383-76-9	98%（HPLC）
1818	Cyclolariciresinol	548-29-8	98%（HPLC）
1819	7-O-Methylbaicalein	29550-13-8	98%（HPLC）
1820	Baicalin methyl ester	82475-03-4	95%（HPLC）
1821	Hypaconine	63238-68-6	98%（HPLC）
1822	Manzamine A	104196-68-1	98%（HPLC）
1823	Dulcosidea	64432-06-0	98%（HPLC）
1824	Emetine dihydrochloride	316-42-7	98%（HPLC）
1825	primin	15121-94-5	98%（HPLC）
1826	Pinostrobin	480-37-5	98%（HPLC）
1827	Diosbulbin D	66756-57-8	98%（HPLC）
1828	Limocitrin	489-33-8	98%（HPLC）
1829	Chrysoriol	491-71-4	98%（HPLC）
1830	Norsanguinarine	522-30-5	98%（HPLC）
1831	Astraisoflavan-7-O-β-D-glucoside	1011711-05-9	98%（HPLC）
1832	Astraisoflavan-7-O-β-D-glucoside	136087-29-1	98%（HPLC）
1833	β-D-Glucopyranoside,(3β,6α,16β,20R,24S)-3-[(3,4-di-O-acetyl-β-D-xylopyranosyl)oxy]-20, 24-epoxy-16,25-dihydroxy-9,19-cyclolanostan-6-yl	1324005-51-7	98%（HPLC）
1834	Cyclocephaloside II	215776-78-6	98%（HPLC）
1835	Gentiannine	439-89-4	98%（HPLC）
1836	Dimethoxy strychnine sulfate	4845-99-2	98%（HPLC）
1837	Pseudobufarenogin	17008-69-4	98%（HPLC）
1838	Bufarenogin	17008-65-0	98%（HPLC）
1839	13-Methylberberine	54260-72-9	98%（HPLC）
1840	Regelidine	114542-54-0	98%（HPLC）
1841	Cistanoside F	97411-47-7	98%（HPLC）
1842	Genistein 7-O-β-D-glucopyranoside-4’-O-[α-L-rhamnopyranosyl-(1→2)-β-D-glucopyranoside]	70404-42-1	98%（HPLC）
1843	Heraclenin	2880-49-1	98%（HPLC）
1844	Ligustroside	35897-92-8	98%（HPLC）
1845	8-Isopentenylgenistein	104691-86-3	98%（HPLC）
1846	kaempferol-3-O-galactoside	23627-87-4	98%（HPLC）
1847	3-O-Acetyl-16α-hydroxydehydrotrametenolic acid	168293-14-9	95%（HPLC）
1848	3-O-Acetyl-16α-hydroxytrametenolic acid	168293-13-8	98%（HPLC）
1849	Cimifugin 4'-O-β-D-glucopyranoside	1632110-81-6	98%（HPLC）
1850	Cimicidanol 3- O-α-L -arabinoside	161207-05-2	98%（HPLC）
1851	Hosenkoside M	161016-51-9	98%（HPLC）
1852	Hosenkoside G	160896-46-8	98%（HPLC）
1853	Hosenkoside F	160896-45-7	98%（HPLC）
1854	O-Tigloylgymnemagenin, 21-	1581276-63-2	98%（HPLC）
1855	Grosvenorine	156980-60-8	98%（HPLC）
1856	6-Methoxydihydrosanguinarine	151890-26-5	98%（HPLC）
1857	Kinsenoside	151870-74-5	98%（HPLC）
1858	3,6,7-Trimethylquercetagetin	14965-20-9	98%（HPLC）
1859	Plantainoside D	147331-98-4	98%（HPLC）
1860	Heterophyllin B	145459-19-4	98%（HPLC）
1861	Oxyresveratrol 3'-O-β-D-glucopyranoside	144525-40-6	98%（HPLC）
1862	Rotundatin	144506-16-1	98%（HPLC）
1863	Isosakuranetin 7-O-rutinoside	14259-47-3	98%（HPLC）
1864	Epimedin A1	140147-77-9	98%（HPLC）
1865	Isoscoparin	20013-23-4	98%（HPLC）
1866	Quercetin 3-O-β-D-Glucuronide	22688-79-5	98%（HPLC）
1867	Hinesol	23811-08-7	98%（HPLC）
1868	Norkurarinone	34981-24-3	98%（HPLC）
1869	Trigonelline	535-83-1	98%（HPLC）
1870	Calcifediol	63283-36-3	98%（HPLC）
1871	Maackiain	19908-48-6	98%（HPLC）
1872	cysteine	52-90-4	98%（HPLC）
1873	Eupatorin	855-96-9	98%（HPLC）
1874	Kaempferol-3-O-glucorhamnoside	40437-72-7	98%（HPLC）
1875	5-O-Methylvisammioside, 6''-O-apiosyl-	139446-82-5	98%（HPLC）
1876	Picfeltarraenin X	1391826-61-1	97%（HPLC）
1877	Poricoic acid A	137551-38-3	98%（HPLC）
1878	Timosaponin B2	136656-07-0	98%（HPLC）
1879	Przewalskinic acid A	136112-75-9	98%（HPLC）
1880	3'-Geranyl-3-prenyl-5,7,2',4'-tetrahydroxyflavone	1334309-44-2	98%（HPLC）
1881	Brandioside	133393-81-4	98%（HPLC）
1882	Neoeriocitrin	13241-32-2	98%（HPLC）
1883	Decursinol mebutate	130848-06-5	98%（HPLC）
1884	Benzoylgomisin O	130783-32-3	98%（HPLC）
1885	(-)-Catechin gallate	130405-40-2	98%（HPLC）
1886	(±)-Prantschimgin	23458-02-8	98%（HPLC）
1887	Lithospermoside	63492-69-3	98%（HPLC）
1888	Garcinone D	107390-08-9	98%（HPLC）
1889	1,3,5-Tricaffeoylquinic acid	1073897-80-9	98%（HPLC）
1890	Atractyloside potassium salt	102130-43-8	98%（HPLC）
1891	Columbamine	3621-36-1	98%（HPLC）
1892	Dihydrochelerythrine	6880-91-7	98%（HPLC）
1893	Euphadienol	514-47-6	98%（HPLC）
1894	Euphorbia factor L1	76376-43-7	98%（HPLC）
1895	Secoisolariciresinol Diglucoside	148244-82-0	98%（HPLC）
1896	Cyperotundone	3466-15-7	98%（HPLC）
1897	Salviaflaside	178895-25-5	98%（HPLC）
1898	Isoastragaloside IV	136033-55-1	98%（HPLC）
1899	Rosamultin	88515-58-6	98%（HPLC）
1900	Ophiogenin 3-O-α-L-rhamnopyranosyl-(1→2)-β-D-glucopyranoside	128502-94-3	98%（HPLC）
1901	Euojaponine D	128397-42-2	98%（HPLC）
1902	(2R)-5,7-Dimethoxyflavanone	1277188-85-8	98%（HPLC）
1903	Rebaudioside G	127345-21-5	98%（HPLC）
1904	11-oxo-Mogroside V	126105-11-1	98%（HPLC）
1905	Periplogenin 3-[O-β-glucopyranosyl-(1→4)-β-sarmentopyranoside]	1253421-94-1	98%（HPLC）
1906	25(S)-Ruscogenin 1-O-α-L-rhamnopyranosyl-(1→2)-β-D-xylopyranoside	125225-63-0	98%（HPLC）
1907	Alcesefoliside	124151-38-8	98%（HPLC）
1908	Hypocrellin B	123940-54-5	98%（HPLC）
1909	Aescin A	123748-68-5	98%（HPLC）
1910	Galloylpaeoniflorin	122965-41-7	98%（HPLC）
1911	Orientin-2''-O-p-trans-coumarate	1229437-75-5	98%（HPLC）
1912	Paederosidic acid methyl ester	122413-01-8	98%（HPLC）
1913	Gymnemic acid I	122168-40-5	98%（HPLC）
1914	Baohuoside VII	119730-89-1	98%（HPLC）
1915	Scutellarin methyl ester	119262-68-9	98%（HPLC）
1916	Baohuoside V	118544-18-6	98%（HPLC）
1917	Soyasaponin Ab	118194-13-1	95%（HPLC）
1918	Schisanwilsonin H	1181216-83-0	98%（HPLC）
1919	3,5,6,7,8,3',4'-Heptamethoxyflavone	1178-24-1	98%（HPLC）
1920	Soyasaponin Aa	117230-33-8	98%（HPLC）
1921	Isoflavone	574-12-9	90%（HPLC）
1922	Wulignan A1	117047-76-4	98%（HPLC）
1923	Methoxypuerarin, 3'-	117047-07-1	98%（HPLC）
1924	9'''-Methyl salvianolate B	1167424-32-9	98%（HPLC）
1925	9''-Methyl salvianolate B	1167424-31-8	98%（HPLC）
1926	Aldehydoisoophiopogonanone A, 6-	116291-82-8	98%（HPLC）
1927	Angoroside C	115909-22-3	98%（HPLC）
1928	Soyasaponin Ba	114590-20-4	98%（HPLC）
1929	Ilexhainanoside D	1137648-52-2	98%（HPLC）
1930	1,2-O-Dilinoleoyl-3-O-β-D-galactopyranosylracglycerol	111187-15-6	98%（HPLC）
1931	Hydroxy Sprengerinin C, 14-	1111088-89-1	98%（HPLC）
1932	Cinobufotalin	1108-68-5	98%（HPLC）
1933	Mauritianin	109008-28-8	98%（HPLC）
1934	Ilexoside D	109008-27-7	98%（HPLC）
1935	Ilexoside K	109008-26-6	95%（HPLC）
1936	Eupalinolide K	108657-10-9	98%（HPLC）
1937	Ganoderic acid D	108340-60-9	98%（HPLC）
1938	Ganodermanondiol	107900-76-5	98%（HPLC）
1939	Matairesinol 4'-O-β-gentiobioside	106647-14-7	98%（HPLC）
1940	Aloeresin D	105317-67-7	98%（HPLC）
1941	Ganoderal A	104700-98-3	95%（HPLC）
1942	Ganolactone B	1028449-53-7	98%（HPLC）
1943	Procyanidin A1	103883-03-0	98%（HPLC）
1944	Ganoderic acid F, deacetyl-	100665-44-9	98%（HPLC）
1945	Ganoderenic acid C	100665-42-7	98%（HPLC）
1946	Ganoderenic acid A	100665-40-5	98%（HPLC）
1947	Herbacetin	527-95-7	98%（HPLC）
1948	(+)-Brazilin	474-07-7	98%（HPLC）
1949	大花龙胆新I	NA	98%（HPLC）
1950	Szechenyin A	NA	98%（HPLC）
1951	Isoastilbin	54081-48-0	98%（HPLC）
1952	Glucodigifucoside	2446-63-1	98%（HPLC）
1953	Isobutyrylshikonin	52438-12-7	98%（HPLC）
1954	Isorhamnetin 7-O-α-L-rhamnoside	17331-72-5	95%（HPLC）
1955	Isorhamnetin 3-O-α-L-arabinoside-7- O-α-L-rhamnoside	NA	90%（HPLC）
1956	Isodeoxyelephantopin	38927-54-7	98%（HPLC）
1957	3,5,6,6-tetramethyl-4,5,5a,6,7,8-hexahydrocyclopenta[c]pentalen-2(1H)-one	NA	98%（HPLC）
1958	Gentiournoside D	157722-21-9	98%（HPLC）
1959	Visammioside, 6''-O-apiosyl-	NA	98%（HPLC）
1960	Vaccarin E	NA	98%（HPLC）
1961	pelargonidin chloride	134-04-3	95%（HPLC）
1962	Cheilanthifoline	483-44-3	98%（HPLC）
1963	Ophiopogonside A	NA	98%（HPLC）
1964	Epimagnolin A	41689-51-4	98%（HPLC）
1965	Teucvin	53625-15-3	98%（HPLC）
1966	Diphyllin	22055-22-7	98%（HPLC）
1967	Dihydrowithaferin A	5589-41-3	98%（HPLC）
1968	Marmin	14957-38-1	98%（HPLC）
1969	Heraclenol	31575-93-6	98%（HPLC）
1970	(+)-Auraptenol	1221-43-8	98%（HPLC）
1971	Veratrdine	71-62-5	98%（HPLC）
1972	15-DihydroepioxylubiMin	129214-59-1	98%（HPLC）
1973	Physcion-1-O-β-D-glucoside	26296-54-8	98%（HPLC）
1974	Physcion-8-O-β-D-glucoside	23451-01-6	98%（HPLC）
1975	poricoic acid AM	151200-92-9	95%（HPLC）
1976	Poricoic acid B	137551-39-4	90%（HPLC）
1977	Ganoderenic acid B	100665-41-6	98%（HPLC）
1978	Gypenoside XVII	80321-69-3	98%（HPLC）
1979	Kalopanaxsaponin H	128730-82-5	98%（HPLC）
1980	Helicide	80154-34-3	98%（HPLC）
1981	Ethyl ferulate	4046-02-0	98%（HPLC）
1982	L-Menthol	2216-51-5	98%（HPLC）
1983	Hesperidine Methyl Chalcone	24292-52-2	98%（HPLC）
1984	Butylamine	109-73-9	98%（HPLC）
1985	Anemonin	90921-11-2	98%（HPLC）
1986	Chebulagic acid	23094-71-5	98%（HPLC）
1987	Bergamottin	7380-40-7	98%（HPLC）
1988	Neoruscogenin	17676-33-4	98%（HPLC）
1989	Notoginsenoside Fa	88100-04-3	98%（HPLC）
1990	Notoginsenoside Fc	88122-52-5	98%（HPLC）
1991	Taraxasterol	1059-14-9	98%（HPLC）
1992	Viscidulin III	92519-91-0	98%（HPLC）
1993	Lindleyin	59282-56-3	98%（HPLC）
1994	Hesperetin 7-O-glucoside	31712-49-9	98%（HPLC）
1995	Feretoside	27530-67-2	98%（HPLC）
1996	Steviol	471-80-7	98%（HPLC）
[truncated: 335 more rows]
