# Supplementary material for: Comprehensive Bioinformatics Analysis Combined with Wet-Lab Experiments to Find Target Proteins of Chinese Medicine Monomer
Source: Molecules. 2022 Sep 19;27(18):6105. doi: 10.3390/molecules27186105 (PMC9504604; doi:10.3390/molecules27186105)
Supplement: Supplementary file 1 [file molecules-27-06105-s001.zip › Supplementary Table S2.xls]

gene_id	BaseMean	BaseMean_control_D_DMSO	BaseMean_case_D_DT	FoldChange	log2FoldChange	p-value	q-value	Expression_D_DMSO	Expression_D_DT	gene_Dbxref	description	GO_id	GO_term	pathway	pathway_description	TF_family
Abca12	2.490339982	0	4.980679964	Inf	Inf	0.182708175	1	0	0.024672373	301482		GO:0000139,GO:0003336,GO:0005102,GO:0005319,GO:0005524,GO:0005737,GO:0005829,GO:0005886,GO:0006672,GO:0006869,GO:0006886,GO:0010875,GO:0016021,GO:0030216,GO:0031424,GO:0032379,GO:0032940,GO:0033700,GO:0034191,GO:0035627,GO:0042626,GO:0043129,GO:0043231,GO:0043589,GO:0045055,GO:0045616,GO:0048286,GO:0055085,GO:0055088,GO:0061178,GO:0061436,GO:0072659,GO:0097209,GO:0097234,GO:2000010	Golgi membrane|corneocyte desquamation|signaling receptor binding|lipid transporter activity|ATP binding|cytoplasm|cytosol|plasma membrane|ceramide metabolic process|lipid transport|intracellular protein transport|positive regulation of cholesterol efflux|integral component of membrane|keratinocyte differentiation|keratinization|positive regulation of intracellular lipid transport|secretion by ce…	rno02010	ABC transporters
Abcg5	1.494203989	0	2.988407978	Inf	Inf	0.372732404	1	0	0.064955267	114628	ATP binding cassette subfamily G member 5	GO:0005524,GO:0005887,GO:0007584,GO:0007588,GO:0010212,GO:0010949,GO:0014850,GO:0015918,GO:0016020,GO:0016324,GO:0031667,GO:0033344,GO:0038183,GO:0042493,GO:0042626,GO:0042632,GO:0043190,GO:0043235,GO:0045177,GO:0045796,GO:0046872,GO:0046982,GO:0055085,GO:0070328,GO:0120009,GO:0120020	ATP binding|integral component of plasma membrane|response to nutrient|excretion|response to ionizing radiation|negative regulation of intestinal phytosterol absorption|response to muscle activity|sterol transport|membrane|apical plasma membrane|response to nutrient levels|cholesterol efflux|bile acid signaling pathway|response to drug|ATPase-coupled transmembrane transporter activity|cholesterol…	rno02010,rno04975,rno04976,rno04979	ABC transporters|Fat digestion and absorption|Bile secretion|Cholesterol metabolism
Abhd16b	0.498067996	0	0.996135993	Inf	Inf	1	1	0	0.028176942	311720	abhydrolase domain containing 16B	GO:0004620,GO:0005654,GO:0006660,GO:0008474,GO:0016020,GO:0047372,GO:0052651,GO:0098734	phospholipase activity|nucleoplasm|phosphatidylserine catabolic process|palmitoyl-(protein) hydrolase activity|membrane|acylglycerol lipase activity|monoacylglycerol catabolic process|macromolecule depalmitoylation
Acot5	0.498067996	0	0.996135993	Inf	Inf	1	1	0	0.0287063	503049	acyl-CoA thioesterase 5	GO:0000038,GO:0001676,GO:0005777,GO:0005829,GO:0006631,GO:0006637,GO:0032788,GO:0032789,GO:0047617	very long-chain fatty acid metabolic process|long-chain fatty acid metabolic process|peroxisome|cytosol|fatty acid metabolic process|acyl-CoA metabolic process|saturated monocarboxylic acid metabolic process|unsaturated monocarboxylic acid metabolic process|acyl-CoA hydrolase activity	rno00062,rno01040,rno04913	Fatty acid elongation|Biosynthesis of unsaturated fatty acids|Ovarian steroidogenesis
Acp4	11.45556392	0	22.91112783	Inf	Inf	0.002566757	0.145096782	0	0.372738256	308569	acid phosphatase 4	GO:0003993,GO:0004725,GO:0005515,GO:0005764,GO:0007040,GO:0010955,GO:0010977,GO:0016021,GO:0016311,GO:0016791,GO:0030971,GO:0042476,GO:0045211,GO:0048168,GO:0120154,GO:1990264	acid phosphatase activity|protein tyrosine phosphatase activity|protein binding|lysosome|lysosome organization|negative regulation of protein processing|negative regulation of neuron projection development|integral component of membrane|dephosphorylation|phosphatase activity|receptor tyrosine kinase binding|odontogenesis|postsynaptic membrane|regulation of neuronal synaptic plasticity|negative re…
Acsm5	1.992271985	0	3.984543971	Inf	Inf	0.256541743	1	0	0.058591988	361637	acyl-CoA synthetase medium-chain family member 5	GO:0000166,GO:0004321,GO:0005524,GO:0005525,GO:0005759,GO:0006633,GO:0006637,GO:0015645,GO:0031956,GO:0046872,GO:0047760	nucleotide binding|fatty-acyl-CoA synthase activity|ATP binding|GTP binding|mitochondrial matrix|fatty acid biosynthetic process|acyl-CoA metabolic process|fatty acid ligase activity|medium-chain fatty acid-CoA ligase activity|metal ion binding|butyrate-CoA ligase activity	rno00650	Butanoate metabolism
Actg2	0.498067996	0	0.996135993	Inf	Inf	1	1	0	0.038837935	25365	actin gamma 2, smooth muscle	GO:0005524,GO:0005737,GO:0005869,GO:0010628,GO:0014829,GO:0030027,GO:0030175,GO:0032982,GO:0044297,GO:0071944,GO:0090131	ATP binding|cytoplasm|dynactin complex|positive regulation of gene expression|vascular associated smooth muscle contraction|lamellipodium|filopodium|myosin filament|cell body|cell periphery|mesenchyme migration	rno04270	Vascular smooth muscle contraction
Actrt3	0.498067996	0	0.996135993	Inf	Inf	1	1	0	0.047921001	365763	actin-related protein T3	GO:0001673	male germ cell nucleus
Adam3a	0.498067996	0	0.996135993	Inf	Inf	1	1	0	0.020553358	57021	ADAM metallopeptidase domain 3A	GO:0004222,GO:0005886,GO:0006508,GO:0007155,GO:0007338,GO:0007339,GO:0008584,GO:0009566,GO:0009986,GO:0010628,GO:0016021,GO:0030317,GO:0032991,GO:0045121,GO:0050684,GO:0061827	metalloendopeptidase activity|plasma membrane|proteolysis|cell adhesion|single fertilization|binding of sperm to zona pellucida|male gonad development|fertilization|cell surface|positive regulation of gene expression|integral component of membrane|flagellated sperm motility|protein-containing complex|membrane raft|regulation of mRNA processing|sperm head
Adgrl4	0.498067996	0	0.996135993	Inf	Inf	1	1	0	0.012580531	64124	adhesion G protein-coupled receptor L4	GO:0004930,GO:0005509,GO:0005886,GO:0005887,GO:0007166,GO:0007189,GO:0031410,GO:0065003	G protein-coupled receptor activity|calcium ion binding|plasma membrane|integral component of plasma membrane|cell surface receptor signaling pathway|adenylate cyclase-activating G protein-coupled receptor signaling pathway|cytoplasmic vesicle|protein-containing complex assembly
Adra2b	1.494203989	0	2.988407978	Inf	Inf	0.372732404	1	0	0.03964406	24174	adrenoceptor alpha 2B	GO:0000165,GO:0000187,GO:0001525,GO:0003056,GO:0004930,GO:0004935,GO:0004938,GO:0005515,GO:0005829,GO:0005887,GO:0007186,GO:0007565,GO:0009986,GO:0016021,GO:0030168,GO:0032148,GO:0035624,GO:0043231,GO:0043410,GO:0045666,GO:0045777,GO:0051379,GO:0070474,GO:0071875,GO:0071880	MAPK cascade|activation of MAPK activity|angiogenesis|regulation of vascular associated smooth muscle contraction|G protein-coupled receptor activity|adrenergic receptor activity|alpha2-adrenergic receptor activity|protein binding|cytosol|integral component of plasma membrane|G protein-coupled receptor signaling pathway|female pregnancy|cell surface|integral component of membrane|platelet activat…	rno04022,rno04080	cGMP-PKG signaling pathway|Neuroactive ligand-receptor interaction
Afp	0.498067996	0	0.996135993	Inf	Inf	1	1	0	0.023896263	24177	alpha-fetoprotein	GO:0001542,GO:0001889,GO:0005504,GO:0005615,GO:0005737,GO:0006810,GO:0008270,GO:0010033,GO:0019953,GO:0031016,GO:0031100,GO:0042448,GO:0046872,GO:0060395	ovulation from ovarian follicle|liver development|fatty acid binding|extracellular space|cytoplasm|transport|zinc ion binding|response to organic substance|sexual reproduction|pancreas development|animal organ regeneration|progesterone metabolic process|metal ion binding|SMAD protein signal transduction	rno04390	Hippo signaling pathway
Agr2	0.498067996	0	0.996135993	Inf	Inf	1	1	0	0.04528352	298961	anterior gradient 2, protein disulphide isomerase family member	GO:0002162,GO:0005154,GO:0005615,GO:0005783,GO:0010628,GO:0010811,GO:0034976,GO:0042802,GO:0045742,GO:0048546,GO:0048639,GO:0060480,GO:0060548,GO:0070254,GO:1903078,GO:1903896,GO:1903899	dystroglycan binding|epidermal growth factor receptor binding|extracellular space|endoplasmic reticulum|positive regulation of gene expression|positive regulation of cell-substrate adhesion|response to endoplasmic reticulum stress|identical protein binding|positive regulation of epidermal growth factor receptor signaling pathway|digestive tract morphogenesis|positive regulation of developmental g…
Akr1c15	0.498067996	0	0.996135993	Inf	Inf	1	1	0	0.040180193	361267	aldo-keto reductase family 1, member C15	GO:0004032,GO:0004033,GO:0005737,GO:0005829,GO:0008202,GO:0016229,GO:0047086,GO:0047834,GO:0047886	alditol:NADP+ 1-oxidoreductase activity|aldo-keto reductase (NADP) activity|cytoplasm|cytosol|steroid metabolic process|steroid dehydrogenase activity|ketosteroid monooxygenase activity|D-threo-aldose 1-dehydrogenase activity|farnesol dehydrogenase activity	rno00140,rno00590,rno00790,rno04913	Steroid hormone biosynthesis|Arachidonic acid metabolism|Folate biosynthesis|Ovarian steroidogenesis
Amdhd1	1.494203989	0	2.988407978	Inf	Inf	0.372732404	1	0	0.124371713	299735	amidohydrolase domain containing 1	GO:0005737,GO:0006548,GO:0019556,GO:0019557,GO:0050480	cytoplasm|histidine catabolic process|histidine catabolic process to glutamate and formamide|histidine catabolic process to glutamate and formate|imidazolonepropionase activity	rno00340	Histidine metabolism
Amtn	0.996135993	0	1.992271985	Inf	Inf	0.573868536	1	0	0.100526009	689404	amelotin	GO:0005576,GO:0005604,GO:0005911,GO:0007155,GO:0031012,GO:0031214,GO:0042475,GO:0070169,GO:0070175	extracellular region|basement membrane|cell-cell junction|cell adhesion|extracellular matrix|biomineral tissue development|odontogenesis of dentin-containing tooth|positive regulation of biomineral tissue development|positive regulation of enamel mineralization
Ankrd31	0.996135993	0	1.992271985	Inf	Inf	0.573868536	1	0	0.026753295	100359720		GO:0000785,GO:0007129,GO:0010780,GO:1903343	chromatin|homologous chromosome pairing at meiosis|meiotic DNA double-strand break formation involved in reciprocal meiotic recombination|positive regulation of meiotic DNA double-strand break formation
Ano2	0.498067996	0	0.996135993	Inf	Inf	1	1	0	0.013525502	100361584		GO:0005229,GO:0005254,GO:0005654,GO:0005886,GO:0006821,GO:0016021,GO:0017128,GO:0042802,GO:0046983,GO:0055085,GO:0097730,GO:1902476	intracellular calcium activated chloride channel activity|chloride channel activity|nucleoplasm|plasma membrane|chloride transport|integral component of membrane|phospholipid scramblase activity|identical protein binding|protein dimerization activity|transmembrane transport|non-motile cilium|chloride transmembrane transport	rno04740	Olfactory transduction
Ano7	0.996135993	0	1.992271985	Inf	Inf	0.573868536	1	0	0.039007904	367318	anoctamin 7	GO:0005229,GO:0005254,GO:0005634,GO:0005783,GO:0005886,GO:0006821,GO:0016021,GO:0017128,GO:0046983,GO:0055085,GO:0061588,GO:0061589,GO:0061590,GO:0061591,GO:1902476	intracellular calcium activated chloride channel activity|chloride channel activity|nucleus|endoplasmic reticulum|plasma membrane|chloride transport|integral component of membrane|phospholipid scramblase activity|protein dimerization activity|transmembrane transport|calcium activated phospholipid scrambling|calcium activated phosphatidylserine scrambling|calcium activated phosphatidylcholine scra…
Apon	0.996135993	0	1.992271985	Inf	Inf	0.573868536	1	0	0.086397151	304603	apolipoprotein N	GO:0005615,GO:0008203	extracellular space|cholesterol metabolic process
Arl9	0.498067996	0	0.996135993	Inf	Inf	1	1	0	0.014913507	289565	ADP-ribosylation factor like GTPase 9	GO:0005525	GTP binding
Asb16	0.498067996	0	0.996135993	Inf	Inf	1	1	0	0.03814539	498005	ankyrin repeat and SOCS box-containing 16	GO:0016567,GO:0035556	protein ubiquitination|intracellular signal transduction
Asb4	0.498067996	0	0.996135993	Inf	Inf	1	1	0	0.035440581	500017	ankyrin repeat and SOCS box-containing 4	GO:0004842,GO:0019899,GO:0031462,GO:0031466,GO:0031625,GO:0035556,GO:0051865,GO:0061630,GO:2001214	ubiquitin-protein transferase activity|enzyme binding|Cul2-RING ubiquitin ligase complex|Cul5-RING ubiquitin ligase complex|ubiquitin protein ligase binding|intracellular signal transduction|protein autoubiquitination|ubiquitin protein ligase activity|positive regulation of vasculogenesis
Ascl5	0.498067996	0	0.996135993	Inf	Inf	1	1	0	0.036959113	363991		GO:0000977,GO:0000981,GO:0006357,GO:0045944,GO:0046983,GO:0090575	RNA polymerase II transcription regulatory region sequence-specific DNA binding|DNA-binding transcription factor activity, RNA polymerase II-specific|regulation of transcription by RNA polymerase II|positive regulation of transcription by RNA polymerase II|protein dimerization activity|RNA polymerase II transcription regulator complex			bHLH
Astl	0.498067996	0	0.996135993	Inf	Inf	1	1	0	0.014318564	296129	astacin like metalloendopeptidase	GO:0004222,GO:0005737,GO:0005886,GO:0006508,GO:0007155,GO:0008233,GO:0008270,GO:0009566,GO:0010954,GO:0060468,GO:0060473,GO:0070001,GO:0070002,GO:2000360	metalloendopeptidase activity|cytoplasm|plasma membrane|proteolysis|cell adhesion|peptidase activity|zinc ion binding|fertilization|positive regulation of protein processing|prevention of polyspermy|cortical granule|aspartic-type peptidase activity|glutamic-type peptidase activity|negative regulation of binding of sperm to zona pellucida
Atp4a	0.996135993	0	1.992271985	Inf	Inf	0.573868536	1	0	0.032168323	24216	ATPase H+/K+ transporting subunit alpha	GO:0000287,GO:0001696,GO:0005391,GO:0005524,GO:0005886,GO:0006883,GO:0008900,GO:0010155,GO:0010248,GO:0016021,GO:0016324,GO:0030007,GO:0030955,GO:0036376,GO:0042493,GO:0045851,GO:0071805,GO:1902600,GO:1990573	magnesium ion binding|gastric acid secretion|P-type sodium:potassium-exchanging transporter activity|ATP binding|plasma membrane|cellular sodium ion homeostasis|P-type potassium:proton transporter activity|regulation of proton transport|establishment or maintenance of transmembrane electrochemical gradient|integral component of membrane|apical plasma membrane|cellular potassium ion homeostasis|po…	rno00190,rno04966,rno04971	Oxidative phosphorylation|Collecting duct acid secretion|Gastric acid secretion
Atp6v1b1	2.490339982	0	4.980679964	Inf	Inf	0.182708175	1	0	0.106831476	312488	ATPase H+ transporting V1 subunit B1	GO:0000221,GO:0001503,GO:0003091,GO:0003096,GO:0005524,GO:0005737,GO:0005829,GO:0005902,GO:0006693,GO:0006885,GO:0007588,GO:0007605,GO:0008021,GO:0010468,GO:0015078,GO:0016020,GO:0016323,GO:0016324,GO:0016328,GO:0016471,GO:0030534,GO:0035812,GO:0042048,GO:0042472,GO:0044877,GO:0045851,GO:0046034,GO:0055064,GO:0055074,GO:0055075,GO:0070072,GO:0097401,GO:0098850,GO:1902600	vacuolar proton-transporting V-type ATPase, V1 domain|ossification|renal water homeostasis|renal sodium ion transport|ATP binding|cytoplasm|cytosol|microvillus|prostaglandin metabolic process|regulation of pH|excretion|sensory perception of sound|synaptic vesicle|regulation of gene expression|proton transmembrane transporter activity|membrane|basolateral plasma membrane|apical plasma membrane|lat…	rno00190,rno04145,rno04150,rno04721,rno04966,rno05165,rno05323	Oxidative phosphorylation|Phagosome|mTOR signaling pathway|Synaptic vesicle cycle|Collecting duct acid secretion|Human papillomavirus infection|Rheumatoid arthritis
Avp	1.992271985	0	3.984543971	Inf	Inf	0.256541743	1	0	0.141668442	24221	arginine vasopressin	GO:0001659,GO:0002125,GO:0003084,GO:0004672,GO:0005184,GO:0005185,GO:0005515,GO:0005576,GO:0005615,GO:0006468,GO:0006915,GO:0006939,GO:0007165,GO:0007204,GO:0007621,GO:0007625,GO:0007626,GO:0008284,GO:0010628,GO:0014049,GO:0014070,GO:0030141,GO:0030307,GO:0030425,GO:0031394,GO:0031894,GO:0031895,GO:0031896,GO:0032849,GO:0033138,GO:0033574,GO:0035094,GO:0035176,GO:0035813,GO:0042310,GO:0042538,GO:…	temperature homeostasis|maternal aggressive behavior|positive regulation of systemic arterial blood pressure|protein kinase activity|neuropeptide hormone activity|neurohypophyseal hormone activity|protein binding|extracellular region|extracellular space|protein phosphorylation|apoptotic process|smooth muscle contraction|signal transduction|positive regulation of cytosolic calcium ion concentratio…	rno04072,rno04080,rno04270,rno04962	Phospholipase D signaling pathway|Neuroactive ligand-receptor interaction|Vascular smooth muscle contraction|Vasopressin-regulated water reabsorption
Bco1	0.498067996	0	0.996135993	Inf	Inf	1	1	0	0.017151968	114106	beta-carotene oxygenase 1	GO:0001523,GO:0003834,GO:0004497,GO:0010436,GO:0016121,GO:0042572,GO:0042574,GO:0046872,GO:1901810	retinoid metabolic process|beta-carotene 15,15'-monooxygenase activity|monooxygenase activity|carotenoid dioxygenase activity|carotene catabolic process|retinol metabolic process|retinal metabolic process|metal ion binding|beta-carotene metabolic process	rno00830	Retinol metabolism
Bhmt	0.498067996	0	0.996135993	Inf	Inf	1	1	0	0.028660148	81508	betaine-homocysteine S-methyltransferase	GO:0005829,GO:0006479,GO:0006577,GO:0006579,GO:0008168,GO:0008270,GO:0009086,GO:0010243,GO:0032259,GO:0032991,GO:0044877,GO:0046500,GO:0047150,GO:0070062,GO:0071267	cytosol|protein methylation|amino-acid betaine metabolic process|amino-acid betaine catabolic process|methyltransferase activity|zinc ion binding|methionine biosynthetic process|response to organonitrogen compound|methylation|protein-containing complex|protein-containing complex binding|S-adenosylmethionine metabolic process|betaine-homocysteine S-methyltransferase activity|extracellular exosome|…	rno00260,rno00270	Glycine, serine and threonine metabolism|Cysteine and methionine metabolism
Bmp8b	0.498067996	0	0.996135993	Inf	Inf	1	1	0	0.023684604	679119		GO:0002024,GO:0005125,GO:0005615,GO:0007281,GO:0007283,GO:0008083,GO:0010862,GO:0030509,GO:0043408,GO:0048598,GO:0060395,GO:0070700,GO:0097009	diet induced thermogenesis|cytokine activity|extracellular space|germ cell development|spermatogenesis|growth factor activity|positive regulation of pathway-restricted SMAD protein phosphorylation|BMP signaling pathway|regulation of MAPK cascade|embryonic morphogenesis|SMAD protein signal transduction|BMP receptor binding|energy homeostasis	rno04060,rno04350,rno04390,rno04714	Cytokine-cytokine receptor interaction|TGF-beta signaling pathway|Hippo signaling pathway|Thermogenesis
Bpifb1	0.498067996	0	0.996135993	Inf	Inf	1	1	0	0.031274758	499926	BPI fold containing family B, member 1	GO:0002227,GO:0005576,GO:0005615,GO:0008289,GO:0034144	innate immune response in mucosa|extracellular region|extracellular space|lipid binding|negative regulation of toll-like receptor 4 signaling pathway
Brs3	0.498067996	0	0.996135993	Inf	Inf	1	1	0	0.03340402	260319	bombesin receptor subtype 3	GO:0004930,GO:0004946,GO:0005886,GO:0005887,GO:0007186,GO:0031989,GO:0043005,GO:0043025	G protein-coupled receptor activity|bombesin receptor activity|plasma membrane|integral component of plasma membrane|G protein-coupled receptor signaling pathway|bombesin receptor signaling pathway|neuron projection|neuronal cell body	rno04080	Neuroactive ligand-receptor interaction
Btnl5	0.996135993	0	1.992271985	Inf	Inf	0.573868536	1	0	0.055020408	686048	butyrophilin-like 5	GO:0001817,GO:0005102,GO:0009897,GO:0016021,GO:0050852	regulation of cytokine production|signaling receptor binding|external side of plasma membrane|integral component of membrane|T cell receptor signaling pathway
C2H1orf54	0.996135993	0	1.992271985	Inf	Inf	0.573868536	1	0	0.163297211	120093057
C4bpa	0.996135993	0	1.992271985	Inf	Inf	0.573868536	1	0	0.046282853	24235	complement component 4 binding protein, alpha	GO:0001669,GO:0001848,GO:0002081,GO:0002199,GO:0005615,GO:0005886,GO:0006955,GO:0006958,GO:0007338,GO:0007339,GO:0009609,GO:0043159,GO:0044297,GO:0045087,GO:0045732,GO:0045959,GO:1903027	acrosomal vesicle|complement binding|outer acrosomal membrane|zona pellucida receptor complex|extracellular space|plasma membrane|immune response|complement activation, classical pathway|single fertilization|binding of sperm to zona pellucida|response to symbiotic bacterium|acrosomal matrix|cell body|innate immune response|positive regulation of protein catabolic process|negative regulation of co…	rno04610,rno05133	Complement and coagulation cascades|Pertussis
C6H2orf16	1.992271985	0	3.984543971	Inf	Inf	0.256541743	1	0	0.031701148	120093230
C8a	0.996135993	0	1.992271985	Inf	Inf	0.573868536	1	0	0.021629863	298288	complement C8 alpha chain	GO:0001848,GO:0005576,GO:0005579,GO:0005615,GO:0006956,GO:0006958,GO:0019835,GO:0044877,GO:0045087	complement binding|extracellular region|membrane attack complex|extracellular space|complement activation|complement activation, classical pathway|cytolysis|protein-containing complex binding|innate immune response	rno04610,rno05020,rno05146,rno05171,rno05322	Complement and coagulation cascades|Prion disease|Amoebiasis|Coronavirus disease - COVID-19|Systemic lupus erythematosus
C8b	0.498067996	0	0.996135993	Inf	Inf	1	1	0	0.019984991	313421	complement C8 beta chain	GO:0005576,GO:0005579,GO:0005615,GO:0006957,GO:0006958,GO:0019835,GO:0044877	extracellular region|membrane attack complex|extracellular space|complement activation, alternative pathway|complement activation, classical pathway|cytolysis|protein-containing complex binding	rno04610,rno05020,rno05146,rno05171,rno05322	Complement and coagulation cascades|Prion disease|Amoebiasis|Coronavirus disease - COVID-19|Systemic lupus erythematosus
Cacna1f	0.996135993	0	1.992271985	Inf	Inf	0.573868536	1	0	0.017898205	114493	calcium voltage-gated channel subunit alpha1 F	GO:0001750,GO:0005245,GO:0005891,GO:0006816,GO:0006874,GO:0007269,GO:0007409,GO:0007601,GO:0008331,GO:0016021,GO:0034765,GO:0043025,GO:0043204,GO:0046872,GO:0048813,GO:0050908,GO:0060041,GO:0070509,GO:0070588,GO:0098793,GO:1901386	photoreceptor outer segment|voltage-gated calcium channel activity|voltage-gated calcium channel complex|calcium ion transport|cellular calcium ion homeostasis|neurotransmitter secretion|axonogenesis|visual perception|high voltage-gated calcium channel activity|integral component of membrane|regulation of ion transmembrane transport|neuronal cell body|perikaryon|metal ion binding|dendrite morphog…	rno04010,rno04020,rno04022,rno04024,rno04260,rno04261,rno04270,rno04723,rno04725,rno04726,rno04727,rno04911,rno04912,rno04921,rno04924,rno04925,rno04927,rno04929,rno04934,rno04935,rno05010,rno05020,rno05022,rno05410,rno05412,rno05414	MAPK signaling pathway|Calcium signaling pathway|cGMP-PKG signaling pathway|cAMP signaling pathway|Cardiac muscle contraction|Adrenergic signaling in cardiomyocytes|Vascular smooth muscle contraction|Retrograde endocannabinoid signaling|Cholinergic synapse|Serotonergic synapse|GABAergic synapse|Insulin secretion|GnRH signaling pathway|Oxytocin signaling pathway|Renin secretion|Aldosterone synthes…
Calcoco2	0.996135993	0	1.992271985	Inf	Inf	0.573868536	1	0	0.031579473	303479		GO:0005737,GO:0005776,GO:0005829,GO:0016605,GO:0034341,GO:0042803,GO:0043231,GO:0048471,GO:0098792,GO:1901098	cytoplasm|autophagosome|cytosol|PML body|response to interferon-gamma|protein homodimerization activity|intracellular membrane-bounded organelle|perinuclear region of cytoplasm|xenophagy|positive regulation of autophagosome maturation	rno04137,rno05164	Mitophagy - animal|Influenza A
Calhm4	0.498067996	0	0.996135993	Inf	Inf	1	1	0	0.042921217	499445		GO:0005261,GO:0005887,GO:0098655	cation channel activity|integral component of plasma membrane|cation transmembrane transport
Capn12	3.486475974	0	6.972951949	Inf	Inf	0.098917487	1	0	0.125877222	308476	calpain 12	GO:0004198,GO:0005509,GO:0005737,GO:0006508	calcium-dependent cysteine-type endopeptidase activity|calcium ion binding|cytoplasm|proteolysis
Capn8	0.498067996	0	0.996135993	Inf	Inf	1	1	0	0.01259238	170808	calpain 8	GO:0004198,GO:0005509,GO:0005737,GO:0005794,GO:0006508,GO:0007586,GO:0042802,GO:1990092	calcium-dependent cysteine-type endopeptidase activity|calcium ion binding|cytoplasm|Golgi apparatus|proteolysis|digestion|identical protein binding|calcium-dependent self proteolysis
Cbln3	1.992271985	0	3.984543971	Inf	Inf	0.256541743	1	0	0.1010961	501998	cerebellin 3 precursor	GO:0005615,GO:0045202	extracellular space|synapse
Ccdc166	0.498067996	0	0.996135993	Inf	Inf	1	1	0	0.029645142	680799	coiled-coil domain containing 166
Ccdc27	0.498067996	0	0.996135993	Inf	Inf	1	1	0	0.024231915	679584	coiled-coil domain containing 27
Ccdc38	0.498067996	0	0.996135993	Inf	Inf	1	1	0	0.017097134	500823		GO:0005813	centrosome
Ccin	1.494203989	0	2.988407978	Inf	Inf	0.372732404	1	0	0.084978554	298392	calicin	GO:0007283,GO:0007420,GO:0015629,GO:0030036,GO:0030154,GO:0032839,GO:0033150,GO:0051015	spermatogenesis|brain development|actin cytoskeleton|actin cytoskeleton organization|cell differentiation|dendrite cytoplasm|cytoskeletal calyx|actin filament binding
Ccl11	0.498067996	0	0.996135993	Inf	Inf	1	1	0	0.05468286	29397	C-C motif chemokine ligand 11	GO:0001938,GO:0002544,GO:0002548,GO:0002551,GO:0005576,GO:0005615,GO:0006954,GO:0007010,GO:0007015,GO:0007186,GO:0007611,GO:0008009,GO:0008360,GO:0030335,GO:0030593,GO:0030838,GO:0031640,GO:0031728,GO:0035962,GO:0043547,GO:0045766,GO:0046983,GO:0048018,GO:0048020,GO:0048245,GO:0048247,GO:0050768,GO:0060444,GO:0060763,GO:0061844,GO:0070098,GO:0070371,GO:0070374,GO:0070670,GO:0071346,GO:0071347,GO:…	positive regulation of endothelial cell proliferation|chronic inflammatory response|monocyte chemotaxis|mast cell chemotaxis|extracellular region|extracellular space|inflammatory response|cytoskeleton organization|actin filament organization|G protein-coupled receptor signaling pathway|learning or memory|chemokine activity|regulation of cell shape|positive regulation of cell migration|neutrophil …	rno04060,rno04061,rno04062,rno04657,rno05310	Cytokine-cytokine receptor interaction|Viral protein interaction with cytokine and cytokine receptor|Chemokine signaling pathway|IL-17 signaling pathway|Asthma
Ccn6	1.992271985	0	3.984543971	Inf	Inf	0.256541743	1	0	0.0852608	499461	cellular communication network factor 6	GO:0005178,GO:0005520,GO:0005615,GO:0005739,GO:0007155,GO:0007165,GO:0008201,GO:0008285,GO:0016525,GO:0031012,GO:0051881,GO:0060548,GO:1903426	integrin binding|insulin-like growth factor binding|extracellular space|mitochondrion|cell adhesion|signal transduction|heparin binding|negative regulation of cell population proliferation|negative regulation of angiogenesis|extracellular matrix|regulation of mitochondrial membrane potential|negative regulation of cell death|regulation of reactive oxygen species biosynthetic process
Ccr1	22.91112783	0	45.82225566	Inf	Inf	8.20E-05	0.010203363	0	1.330488096	57301	C-C motif chemokine receptor 1	GO:0004435,GO:0004950,GO:0005737,GO:0005886,GO:0006816,GO:0006874,GO:0006887,GO:0006954,GO:0006955,GO:0007186,GO:0007204,GO:0007267,GO:0009897,GO:0010629,GO:0016021,GO:0016493,GO:0019722,GO:0019957,GO:0021549,GO:0030099,GO:0030335,GO:0030502,GO:0030595,GO:0035717,GO:0043025,GO:0045672,GO:0045824,GO:0051928,GO:0060326,GO:0070098,GO:0070374,GO:0071791,GO:0090026	phosphatidylinositol phospholipase C activity|chemokine receptor activity|cytoplasm|plasma membrane|calcium ion transport|cellular calcium ion homeostasis|exocytosis|inflammatory response|immune response|G protein-coupled receptor signaling pathway|positive regulation of cytosolic calcium ion concentration|cell-cell signaling|external side of plasma membrane|negative regulation of gene expression…	rno04060,rno04061,rno04062,rno05163,rno05167	Cytokine-cytokine receptor interaction|Viral protein interaction with cytokine and cytokine receptor|Chemokine signaling pathway|Human cytomegalovirus infection|Kaposi sarcoma-associated herpesvirus infection
Ccr10	0.996135993	0	1.992271985	Inf	Inf	0.573868536	1	0	0.061400501	363682	C-C motif chemokine receptor 10	GO:0004950,GO:0005783,GO:0006935,GO:0006955,GO:0007186,GO:0007204,GO:0009897,GO:0009986,GO:0016021,GO:0016493,GO:0019722,GO:0019957,GO:0060326,GO:0070098	chemokine receptor activity|endoplasmic reticulum|chemotaxis|immune response|G protein-coupled receptor signaling pathway|positive regulation of cytosolic calcium ion concentration|external side of plasma membrane|cell surface|integral component of membrane|C-C chemokine receptor activity|calcium-mediated signaling|C-C chemokine binding|cell chemotaxis|chemokine-mediated signaling pathway	rno04060,rno04061,rno04062,rno04672	Cytokine-cytokine receptor interaction|Viral protein interaction with cytokine and cytokine receptor|Chemokine signaling pathway|Intestinal immune network for IgA production
Cd163	0.498067996	0	0.996135993	Inf	Inf	1	1	0	0.012308363	312701	CD163 molecule	GO:0005044,GO:0005886,GO:0006897,GO:0009897,GO:0016021	scavenger receptor activity|plasma membrane|endocytosis|external side of plasma membrane|integral component of membrane
Cd27	0.498067996	0	0.996135993	Inf	Inf	1	1	0	0.025860656	500318	CD27 molecule	GO:0004888,GO:0009897,GO:0009986,GO:0016020,GO:0016021,GO:0043027,GO:0043066,GO:0043154,GO:0045471,GO:0045579,GO:0045582,GO:0046330,GO:0070233,GO:0097191	transmembrane signaling receptor activity|external side of plasma membrane|cell surface|membrane|integral component of membrane|cysteine-type endopeptidase inhibitor activity involved in apoptotic process|negative regulation of apoptotic process|negative regulation of cysteine-type endopeptidase activity involved in apoptotic process|response to ethanol|positive regulation of B cell differentiati…	rno04060	Cytokine-cytokine receptor interaction
Cd300ld	0.996135993	0	1.992271985	Inf	Inf	0.573868536	1	0	0.012016591	100361633		GO:0001618,GO:0005886,GO:0032675,GO:0032680	virus receptor activity|plasma membrane|regulation of interleukin-6 production|regulation of tumor necrosis factor production
Cd300le	0.996135993	0	1.992271985	Inf	Inf	0.573868536	1	0	0.109702229	360655	Cd300 molecule-like family member E	GO:0004888,GO:0005886,GO:0016021	transmembrane signaling receptor activity|plasma membrane|integral component of membrane
Cd5	0.996135993	0	1.992271985	Inf	Inf	0.573868536	1	0	0.051030379	54236	Cd5 molecule	GO:0005044,GO:0005515,GO:0005886,GO:0006897,GO:0009897,GO:0009966,GO:0016021,GO:0031295,GO:0044214,GO:0097190	scavenger receptor activity|protein binding|plasma membrane|endocytosis|external side of plasma membrane|regulation of signal transduction|integral component of membrane|T cell costimulation|spanning component of plasma membrane|apoptotic signaling pathway	rno04640	Hematopoietic cell lineage
Cdh17	1.992271985	0	3.984543971	Inf	Inf	0.256541743	1	0	0.054308034	117048	cadherin 17	GO:0002314,GO:0002315,GO:0002456,GO:0005178,GO:0005427,GO:0005509,GO:0005654,GO:0005886,GO:0006857,GO:0007156,GO:0007229,GO:0009986,GO:0016021,GO:0016323,GO:0016339,GO:0016342,GO:0030054,GO:0030183,GO:0033626,GO:0035672,GO:0045296,GO:0048536,GO:0098742	germinal center B cell differentiation|marginal zone B cell differentiation|T cell mediated immunity|integrin binding|proton-dependent oligopeptide secondary active transmembrane transporter activity|calcium ion binding|nucleoplasm|plasma membrane|oligopeptide transport|homophilic cell adhesion via plasma membrane adhesion molecules|integrin-mediated signaling pathway|cell surface|integral compon…	rno05226	Gastric cancer
Ceacam19	1.992271985	0	3.984543971	Inf	Inf	0.256541743	1	0	0.105691377	680640	CEA cell adhesion molecule 19	GO:0016021	integral component of membrane
Cela2a	0.498067996	0	0.996135993	Inf	Inf	1	1	0	0.058898499	24332	chymotrypsin like elastase 2A	GO:0004175,GO:0004252,GO:0005576,GO:0005615,GO:0006508,GO:0017171,GO:0032868,GO:0036457,GO:0050796,GO:0061436,GO:0090330,GO:1901143	endopeptidase activity|serine-type endopeptidase activity|extracellular region|extracellular space|proteolysis|serine hydrolase activity|response to insulin|keratohyalin granule|regulation of insulin secretion|establishment of skin barrier|regulation of platelet aggregation|insulin catabolic process	rno04972,rno04974	Pancreatic secretion|Protein digestion and absorption
Ces1c	0.996135993	0	1.992271985	Inf	Inf	0.573868536	1	0	0.056353885	24346	carboxylesterase 1C	GO:0005783,GO:0005788,GO:0005811,GO:0016042,GO:0016787,GO:0052689,GO:0080030	endoplasmic reticulum|endoplasmic reticulum lumen|lipid droplet|lipid catabolic process|hydrolase activity|carboxylic ester hydrolase activity|methyl indole-3-acetate esterase activity	rno00983	Drug metabolism - other enzymes
Cftr	0.996135993	0	1.992271985	Inf	Inf	0.573868536	1	0	0.016409892	24255	CF transmembrane conductance regulator	GO:0003254,GO:0005254,GO:0005260,GO:0005515,GO:0005524,GO:0005634,GO:0005737,GO:0005769,GO:0005789,GO:0005829,GO:0005886,GO:0005887,GO:0005902,GO:0006695,GO:0006821,GO:0006833,GO:0006904,GO:0007568,GO:0009986,GO:0015106,GO:0015108,GO:0015701,GO:0016020,GO:0016021,GO:0016323,GO:0016324,GO:0016853,GO:0019869,GO:0019899,GO:0030165,GO:0030301,GO:0030321,GO:0030324,GO:0030425,GO:0030659,GO:0031901,GO:…	regulation of membrane depolarization|chloride channel activity|intracellularly ATP-gated chloride channel activity|protein binding|ATP binding|nucleus|cytoplasm|early endosome|endoplasmic reticulum membrane|cytosol|plasma membrane|integral component of plasma membrane|microvillus|cholesterol biosynthetic process|chloride transport|water transport|vesicle docking involved in exocytosis|aging|cell…	rno02010,rno04024,rno04152,rno04530,rno04971,rno04972,rno04976	ABC transporters|cAMP signaling pathway|AMPK signaling pathway|Tight junction|Gastric acid secretion|Pancreatic secretion|Bile secretion
Chad	0.996135993	0	1.992271985	Inf	Inf	0.573868536	1	0	0.064240044	29195	chondroadherin	GO:0001502,GO:0005615,GO:0016021,GO:0031012,GO:0060348,GO:1900155	cartilage condensation|extracellular space|integral component of membrane|extracellular matrix|bone development|negative regulation of bone trabecula formation	rno04151,rno04510,rno04512,rno05165	PI3K-Akt signaling pathway|Focal adhesion|ECM-receptor interaction|Human papillomavirus infection
Chit1	0.498067996	0	0.996135993	Inf	Inf	1	1	0	0.026673235	289032	chitinase 1	GO:0004568,GO:0005576,GO:0005615,GO:0005975,GO:0006032,GO:0008061,GO:0008843	chitinase activity|extracellular region|extracellular space|carbohydrate metabolic process|chitin catabolic process|chitin binding|endochitinase activity	rno00520	Amino sugar and nucleotide sugar metabolism
Clcnka	0.996135993	0	1.992271985	Inf	Inf	0.573868536	1	0	0.044640932	79425	chloride voltage-gated channel Ka	GO:0001822,GO:0005244,GO:0005247,GO:0005254,GO:0005783,GO:0005887,GO:0006821,GO:0007589,GO:0009268,GO:0009414,GO:0016021,GO:0016323,GO:0016324,GO:0034220,GO:0034707,GO:0034765,GO:0042802,GO:0046872,GO:0050878,GO:0051592,GO:0072053	kidney development|voltage-gated ion channel activity|voltage-gated chloride channel activity|chloride channel activity|endoplasmic reticulum|integral component of plasma membrane|chloride transport|body fluid secretion|response to pH|response to water deprivation|integral component of membrane|basolateral plasma membrane|apical plasma membrane|ion transmembrane transport|chloride channel complex…
Cldnd2	0.996135993	0	1.992271985	Inf	Inf	0.573868536	1	0	0.088616134	499140	claudin domain containing 2	GO:0005886,GO:0016021	plasma membrane|integral component of membrane
Clec2e	1.494203989	0	2.988407978	Inf	Inf	0.372732404	1	0	0.263447471	689853	C-type lectin domain family 2, member E	GO:0009897,GO:0016021,GO:0030246,GO:0046703	external side of plasma membrane|integral component of membrane|carbohydrate binding|natural killer cell lectin-like receptor binding
Clec4b2	0.498067996	0	0.996135993	Inf	Inf	1	1	0	0.074901732	450222	C-type lectin domain family 4, member B2	GO:0016021,GO:0030246,GO:0051281	integral component of membrane|carbohydrate binding|positive regulation of release of sequestered calcium ion into cytosol	rno04625	C-type lectin receptor signaling pathway
Clrn3	0.996135993	0	1.992271985	Inf	Inf	0.573868536	1	0	0.053081724	309082	clarin 3	GO:0016021	integral component of membrane
Cox8c	0.498067996	0	0.996135993	Inf	Inf	1	1	0	0.097059595	360229	cytochrome c oxidase subunit 8C	GO:0004129,GO:0005739,GO:0005743,GO:0006119,GO:0016021,GO:0022900,GO:0045277,GO:1902600	cytochrome-c oxidase activity|mitochondrion|mitochondrial inner membrane|oxidative phosphorylation|integral component of membrane|electron transport chain|respiratory chain complex IV|proton transmembrane transport	rno00190,rno04260,rno04714,rno04932,rno05010,rno05012,rno05014,rno05016,rno05020,rno05022,rno05415	Oxidative phosphorylation|Cardiac muscle contraction|Thermogenesis|Non-alcoholic fatty liver disease|Alzheimer disease|Parkinson disease|Amyotrophic lateral sclerosis|Huntington disease|Prion disease|Pathways of neurodegeneration - multiple diseases|Diabetic cardiomyopathy
Crtam	0.498067996	0	0.996135993	Inf	Inf	1	1	0	0.020577082	300649	cytotoxic and regulatory T cell molecule	GO:0001768,GO:0001772,GO:0001819,GO:0001913,GO:0002355,GO:0002860,GO:0005102,GO:0005886,GO:0007157,GO:0008037,GO:0016021,GO:0032729,GO:0042802,GO:0045580,GO:0045954,GO:0046007,GO:0050798,GO:0050863,GO:0051606,GO:0097021,GO:2001185	establishment of T cell polarity|immunological synapse|positive regulation of cytokine production|T cell mediated cytotoxicity|detection of tumor cell|positive regulation of natural killer cell mediated cytotoxicity directed against tumor cell target|signaling receptor binding|plasma membrane|heterophilic cell-cell adhesion via plasma membrane cell adhesion molecules|cell recognition|integral com…
Csf3	1.494203989	0	2.988407978	Inf	Inf	0.372732404	1	0	0.059334138	25610	colony stimulating factor 3	GO:0005125,GO:0005130,GO:0005615,GO:0006955,GO:0007165,GO:0008083,GO:0008284,GO:0014068,GO:0019899,GO:0030838,GO:0032092,GO:0033138,GO:0045471,GO:0045639,GO:0045944,GO:0050731,GO:0051091,GO:0051897,GO:0071222,GO:0071345,GO:1901215,GO:2000251	cytokine activity|granulocyte colony-stimulating factor receptor binding|extracellular space|immune response|signal transduction|growth factor activity|positive regulation of cell population proliferation|positive regulation of phosphatidylinositol 3-kinase signaling|enzyme binding|positive regulation of actin filament polymerization|positive regulation of protein binding|positive regulation of p…	rno04060,rno04151,rno04630,rno04640,rno04657,rno05144,rno05171	Cytokine-cytokine receptor interaction|PI3K-Akt signaling pathway|JAK-STAT signaling pathway|Hematopoietic cell lineage|IL-17 signaling pathway|Malaria|Coronavirus disease - COVID-19
Csrp3	0.498067996	0	0.996135993	Inf	Inf	1	1	0	0.057505201	117505	cysteine and glycine rich protein 3	GO:0001974,GO:0002026,GO:0003300,GO:0003779,GO:0005515,GO:0005634,GO:0005737,GO:0005856,GO:0006874,GO:0006954,GO:0007507,GO:0007517,GO:0008286,GO:0008307,GO:0030018,GO:0030036,GO:0031433,GO:0033292,GO:0033365,GO:0035995,GO:0042593,GO:0042802,GO:0042805,GO:0045214,GO:0045662,GO:0045663,GO:0045944,GO:0046872,GO:0048738,GO:0055003,GO:0060048,GO:0060537,GO:0070528,GO:1903076,GO:1903919,GO:1903920	blood vessel remodeling|regulation of the force of heart contraction|cardiac muscle hypertrophy|actin binding|protein binding|nucleus|cytoplasm|cytoskeleton|cellular calcium ion homeostasis|inflammatory response|heart development|muscle organ development|insulin receptor signaling pathway|structural constituent of muscle|Z disc|actin cytoskeleton organization|telethonin binding|T-tubule organizat…
Ctse	1.494203989	0	2.988407978	Inf	Inf	0.372732404	1	0	0.073528648	25424	cathepsin E	GO:0004190,GO:0005768,GO:0006508,GO:0008233,GO:0016540,GO:0019886,GO:0042802	aspartic-type endopeptidase activity|endosome|proteolysis|peptidase activity|protein autoprocessing|antigen processing and presentation of exogenous peptide antigen via MHC class II|identical protein binding	rno04142	Lysosome
Ctsw	0.996135993	0	1.992271985	Inf	Inf	0.573868536	1	0	0.085911384	293676	cathepsin W	GO:0004197,GO:0005615,GO:0005764,GO:0051603	cysteine-type endopeptidase activity|extracellular space|lysosome|proteolysis involved in cellular protein catabolic process	rno04142,rno04210	Lysosome|Apoptosis
Cxcr1	2.490339982	0	4.980679964	Inf	Inf	0.182708175	1	0	0.19705172	54258	C-X-C motif chemokine receptor 1	GO:0004918,GO:0006955,GO:0007166,GO:0007186,GO:0007204,GO:0009897,GO:0016021,GO:0016493,GO:0019722,GO:0019957,GO:0019959,GO:0030593,GO:0031623,GO:0038112,GO:0060326,GO:0070098	interleukin-8 receptor activity|immune response|cell surface receptor signaling pathway|G protein-coupled receptor signaling pathway|positive regulation of cytosolic calcium ion concentration|external side of plasma membrane|integral component of membrane|C-C chemokine receptor activity|calcium-mediated signaling|C-C chemokine binding|interleukin-8 binding|neutrophil chemotaxis|receptor internali…	rno04060,rno04061,rno04062,rno04072,rno04144	Cytokine-cytokine receptor interaction|Viral protein interaction with cytokine and cytokine receptor|Chemokine signaling pathway|Phospholipase D signaling pathway|Endocytosis
Cyp11b1	0.498067996	0	0.996135993	Inf	Inf	1	1	0	0.019851461	500892	cytochrome P450, family 11, subfamily b, polypeptide 1	GO:0004507,GO:0005496,GO:0005506,GO:0005739,GO:0005743,GO:0006694,GO:0006700,GO:0006704,GO:0008202,GO:0008203,GO:0008211,GO:0018894,GO:0020037,GO:0030176,GO:0032342,GO:0034650,GO:0034651,GO:0042493,GO:0046085,GO:0047783,GO:0071346,GO:0071375,GO:0071548	steroid 11-beta-monooxygenase activity|steroid binding|iron ion binding|mitochondrion|mitochondrial inner membrane|steroid biosynthetic process|C21-steroid hormone biosynthetic process|glucocorticoid biosynthetic process|steroid metabolic process|cholesterol metabolic process|glucocorticoid metabolic process|dibenzo-p-dioxin metabolic process|heme binding|integral component of endoplasmic reticul…	rno00140,rno04927,rno04934	Steroid hormone biosynthesis|Cortisol synthesis and secretion|Cushing syndrome
Cyp19a1	1.494203989	0	2.988407978	Inf	Inf	0.372732404	1	0	0.056038949	25147	cytochrome P450, family 19, subfamily a, polypeptide 1	GO:0001553,GO:0002677,GO:0005506,GO:0005737,GO:0005783,GO:0005829,GO:0006703,GO:0006710,GO:0008021,GO:0008206,GO:0008207,GO:0008209,GO:0008584,GO:0008585,GO:0009635,GO:0010038,GO:0010164,GO:0010212,GO:0010760,GO:0014070,GO:0016020,GO:0016712,GO:0018879,GO:0018894,GO:0018963,GO:0020037,GO:0021766,GO:0021854,GO:0030186,GO:0030325,GO:0030540,GO:0030851,GO:0030879,GO:0032355,GO:0033574,GO:0042493,GO:…	luteinization|negative regulation of chronic inflammatory response|iron ion binding|cytoplasm|endoplasmic reticulum|cytosol|estrogen biosynthetic process|androgen catabolic process|synaptic vesicle|bile acid metabolic process|C21-steroid hormone metabolic process|androgen metabolic process|male gonad development|female gonad development|response to herbicide|response to metal ion|response to cesi…	rno00140,rno04913	Steroid hormone biosynthesis|Ovarian steroidogenesis
Cyp26c1	0.498067996	0	0.996135993	Inf	Inf	1	1	0	0.015094507	308190		GO:0001972,GO:0004497,GO:0005506,GO:0007417,GO:0008401,GO:0009952,GO:0014032,GO:0016020,GO:0016125,GO:0016491,GO:0020037,GO:0034653,GO:0048284	retinoic acid binding|monooxygenase activity|iron ion binding|central nervous system development|retinoic acid 4-hydroxylase activity|anterior/posterior pattern specification|neural crest cell development|membrane|sterol metabolic process|oxidoreductase activity|heme binding|retinoic acid catabolic process|organelle fusion	rno00830	Retinol metabolism
Cyp2d3	0.498067996	0	0.996135993	Inf	Inf	1	1	0	0.032850023	24303	cytochrome P450, family 2, subfamily d, polypeptide 3	GO:0001889,GO:0004497,GO:0005506,GO:0005737,GO:0005789,GO:0006082,GO:0006805,GO:0008395,GO:0016021,GO:0016712,GO:0019369,GO:0020037,GO:0042738,GO:0043231,GO:0070330	liver development|monooxygenase activity|iron ion binding|cytoplasm|endoplasmic reticulum membrane|organic acid metabolic process|xenobiotic metabolic process|steroid hydroxylase activity|integral component of membrane|oxidoreductase activity, acting on paired donors, with incorporation or reduction of molecular oxygen, reduced flavin or flavoprotein as one donor, and incorporation of one atom of…	rno00140,rno04726	Steroid hormone biosynthesis|Serotonergic synapse
Cyp3a18	0.498067996	0	0.996135993	Inf	Inf	1	1	0	0.026901326	252931	cytochrome P450, family 3, subfamily a, polypeptide 18	GO:0005506,GO:0005789,GO:0008202,GO:0008390,GO:0008395,GO:0016021,GO:0016712,GO:0020037,GO:0050649,GO:0070330,GO:0070989	iron ion binding|endoplasmic reticulum membrane|steroid metabolic process|testosterone 16-alpha-hydroxylase activity|steroid hydroxylase activity|integral component of membrane|oxidoreductase activity, acting on paired donors, with incorporation or reduction of molecular oxygen, reduced flavin or flavoprotein as one donor, and incorporation of one atom of oxygen|heme binding|testosterone 6-beta-h…	rno00140,rno00591,rno00830,rno05204	Steroid hormone biosynthesis|Linoleic acid metabolism|Retinol metabolism|Chemical carcinogenesis
Cyp4a3	0.498067996	0	0.996135993	Inf	Inf	1	1	0	0.021651756	298423	cytochrome P450, family 4, subfamily a, polypeptide 3	GO:0001822,GO:0004497,GO:0005506,GO:0005789,GO:0008391,GO:0016021,GO:0016705,GO:0018685,GO:0019369,GO:0020037,GO:0043231,GO:0043651,GO:0046456,GO:0048252,GO:0102033	kidney development|monooxygenase activity|iron ion binding|endoplasmic reticulum membrane|arachidonic acid monooxygenase activity|integral component of membrane|oxidoreductase activity, acting on paired donors, with incorporation or reduction of molecular oxygen|alkane 1-monooxygenase activity|arachidonic acid metabolic process|heme binding|intracellular membrane-bounded organelle|linoleic acid m…	rno00071,rno00590,rno00830,rno03320,rno04270,rno04750	Fatty acid degradation|Arachidonic acid metabolism|Retinol metabolism|PPAR signaling pathway|Vascular smooth muscle contraction|Inflammatory mediator regulation of TRP channels
Cysltr2	0.498067996	0	0.996135993	Inf	Inf	1	1	0	0.011432201	170926	cysteinyl leukotriene receptor 2	GO:0001631,GO:0005887,GO:0007218,GO:0008528,GO:0010942,GO:0016020,GO:0045766,GO:0061737,GO:0070374	cysteinyl leukotriene receptor activity|integral component of plasma membrane|neuropeptide signaling pathway|G protein-coupled peptide receptor activity|positive regulation of cell death|membrane|positive regulation of angiogenesis|leukotriene signaling pathway|positive regulation of ERK1 and ERK2 cascade	rno04020,rno04080	Calcium signaling pathway|Neuroactive ligand-receptor interaction
Ddx3y	0.996135993	0	1.992271985	Inf	Inf	0.573868536	1	0	0.033741222	364073	DEAD-box helicase 3, Y-linked	GO:0003723,GO:0003724,GO:0005524,GO:0005634,GO:0007276,GO:0007283,GO:0016787,GO:0030154,GO:0043186	RNA binding|RNA helicase activity|ATP binding|nucleus|gamete generation|spermatogenesis|hydrolase activity|cell differentiation|P granule	rno04622,rno05161,rno05203	RIG-I-like receptor signaling pathway|Hepatitis B|Viral carcinogenesis
Defb1	0.498067996	0	0.996135993	Inf	Inf	1	1	0	0.134709916	83687	defensin beta 1	GO:0002227,GO:0002526,GO:0003690,GO:0005615,GO:0009617,GO:0019731,GO:0019898,GO:0019933,GO:0031640,GO:0031731,GO:0033574,GO:0035584,GO:0042742,GO:0042802,GO:0045087,GO:0050829,GO:0050830,GO:0060474,GO:0061844,GO:0097225,GO:1990742	innate immune response in mucosa|acute inflammatory response|double-stranded DNA binding|extracellular space|response to bacterium|antibacterial humoral response|extrinsic component of membrane|cAMP-mediated signaling|killing of cells of other organism|CCR6 chemokine receptor binding|response to testosterone|calcium-mediated signaling using intracellular calcium source|defense response to bacteri…	rno02010,rno05150	ABC transporters|Staphylococcus aureus infection
Depp1	0.498067996	0	0.996135993	Inf	Inf	1	1	0	0.037582457	500300	DEPP1, autophagy regulator	GO:0005737,GO:0005739,GO:0005777,GO:0010506,GO:0043231	cytoplasm|mitochondrion|peroxisome|regulation of autophagy|intracellular membrane-bounded organelle
Dmrt2	0.498067996	0	0.996135993	Inf	Inf	1	1	0	0.021323699	309430	doublesex and mab-3 related transcription factor 2	GO:0000977,GO:0000978,GO:0000981,GO:0001228,GO:0005634,GO:0006357,GO:0007548,GO:0014807,GO:0042802,GO:0043565,GO:0045944,GO:0046872,GO:0048706,GO:0060972,GO:2000287	RNA polymerase II transcription regulatory region sequence-specific DNA binding|RNA polymerase II cis-regulatory region sequence-specific DNA binding|DNA-binding transcription factor activity, RNA polymerase II-specific|DNA-binding transcription activator activity, RNA polymerase II-specific|nucleus|regulation of transcription by RNA polymerase II|sex differentiation|regulation of somitogenesis|i…			DM
Dmrtc2	0.996135993	0	1.992271985	Inf	Inf	0.573868536	1	0	0.025761	499100	DMRT-like family C2	GO:0000978,GO:0000981,GO:0001741,GO:0005634,GO:0006357,GO:0007141,GO:0007281,GO:0007290,GO:0007548,GO:0042802,GO:0043565,GO:0046872,GO:1900111,GO:1900114,GO:1990837	RNA polymerase II cis-regulatory region sequence-specific DNA binding|DNA-binding transcription factor activity, RNA polymerase II-specific|XY body|nucleus|regulation of transcription by RNA polymerase II|male meiosis I|germ cell development|spermatid nucleus elongation|sex differentiation|identical protein binding|sequence-specific DNA binding|metal ion binding|positive regulation of histone H3-…			DM
Dnajc5b	0.996135993	0	1.992271985	Inf	Inf	0.573868536	1	0	0.089431165	499579	DnaJ heat shock protein family (Hsp40) member C5 beta	GO:0016020	membrane	rno04141	Protein processing in endoplasmic reticulum
Dnase2b	0.498067996	0	0.996135993	Inf	Inf	1	1	0	0.005526489	59296	deoxyribonuclease 2 beta	GO:0004520,GO:0004531,GO:0005576,GO:0005737,GO:0005764,GO:0006259,GO:0006309,GO:0090305	endodeoxyribonuclease activity|deoxyribonuclease II activity|extracellular region|cytoplasm|lysosome|DNA metabolic process|apoptotic DNA fragmentation|nucleic acid phosphodiester bond hydrolysis	rno04142	Lysosome
Dpep3	0.498067996	0	0.996135993	Inf	Inf	1	1	0	0.022264711	364994	dipeptidase 3	GO:0001669,GO:0005886,GO:0006508,GO:0008233,GO:0016020,GO:0016805,GO:0031225,GO:0046872,GO:0070573	acrosomal vesicle|plasma membrane|proteolysis|peptidase activity|membrane|dipeptidase activity|anchored component of membrane|metal ion binding|metallodipeptidase activity
Dppa5	0.996135993	0	1.992271985	Inf	Inf	0.573868536	1	0	0.074123128	301101		GO:0003729,GO:0005737,GO:0010468	mRNA binding|cytoplasm|regulation of gene expression
Duoxa2	1.494203989	0	2.988407978	Inf	Inf	0.372732404	1	0	0.166603853	499879	dual oxidase maturation factor 2	GO:0005783,GO:0005789,GO:0005829,GO:0005886,GO:0008104,GO:0010729,GO:0015031,GO:0016020,GO:0016021,GO:0019899,GO:0031252,GO:0034613,GO:0042743,GO:0045177,GO:0050727,GO:0051604,GO:2000147,GO:2000609	endoplasmic reticulum|endoplasmic reticulum membrane|cytosol|plasma membrane|protein localization|positive regulation of hydrogen peroxide biosynthetic process|protein transport|membrane|integral component of membrane|enzyme binding|cell leading edge|cellular protein localization|hydrogen peroxide metabolic process|apical part of cell|regulation of inflammatory response|protein maturation|positiv…	rno04918	Thyroid hormone synthesis
Dusp9	1.494203989	0	2.988407978	Inf	Inf	0.372732404	1	0	0.061969683	293847	dual specificity phosphatase 9	GO:0000188,GO:0004721,GO:0004725,GO:0005737,GO:0005829,GO:0006470,GO:0008330,GO:0017017,GO:0035335,GO:0035970,GO:0043065,GO:0051019,GO:0060420,GO:0070373,GO:0106306,GO:0106307	inactivation of MAPK activity|phosphoprotein phosphatase activity|protein tyrosine phosphatase activity|cytoplasm|cytosol|protein dephosphorylation|protein tyrosine/threonine phosphatase activity|MAP kinase tyrosine/serine/threonine phosphatase activity|peptidyl-tyrosine dephosphorylation|peptidyl-threonine dephosphorylation|positive regulation of apoptotic process|mitogen-activated protein kinas…	rno04010,rno04550	MAPK signaling pathway|Signaling pathways regulating pluripotency of stem cells
Edar	0.498067996	0	0.996135993	Inf	Inf	1	1	0	0.014584084	365581	ectodysplasin-A receptor	GO:0001942,GO:0004888,GO:0005886,GO:0010628,GO:0016021,GO:0038023,GO:0042475,GO:0043123,GO:0043473,GO:0045177,GO:0046330,GO:0060662,GO:1901224	hair follicle development|transmembrane signaling receptor activity|plasma membrane|positive regulation of gene expression|integral component of membrane|signaling receptor activity|odontogenesis of dentin-containing tooth|positive regulation of I-kappaB kinase/NF-kappaB signaling|pigmentation|apical part of cell|positive regulation of JNK cascade|salivary gland cavitation|positive regulation of …	rno04060,rno04064	Cytokine-cytokine receptor interaction|NF-kappa B signaling pathway
Efcab8	0.498067996	0	0.996135993	Inf	Inf	1	1	0	0.011366597	499923
Eif4e1b	0.498067996	0	0.996135993	Inf	Inf	1	1	0	0.016450273	686104				rno01521,rno03013,rno04066,rno04150,rno04151,rno04211,rno04910	EGFR tyrosine kinase inhibitor resistance|RNA transport|HIF-1 signaling pathway|mTOR signaling pathway|PI3K-Akt signaling pathway|Longevity regulating pathway|Insulin signaling pathway
Eps8l1	0.996135993	0	1.992271985	Inf	Inf	0.573868536	1	0	0.019918002	361503	EPS8-like 1	GO:0003779,GO:0005085,GO:0005829,GO:0005886,GO:0007266,GO:0032587,GO:0032991,GO:0035023,GO:0042608,GO:0050790,GO:1900029	actin binding|guanyl-nucleotide exchange factor activity|cytosol|plasma membrane|Rho protein signal transduction|ruffle membrane|protein-containing complex|regulation of Rho protein signal transduction|T cell receptor binding|regulation of catalytic activity|positive regulation of ruffle assembly
Erg	0.498067996	0	0.996135993	Inf	Inf	1	1	0	0.013546058	170909	ETS transcription factor ERG	GO:0000978,GO:0000981,GO:0001228,GO:0003197,GO:0003199,GO:0003682,GO:0005634,GO:0006357,GO:0016477,GO:0030154,GO:0045944,GO:1990837,GO:1990904,GO:2000504	RNA polymerase II cis-regulatory region sequence-specific DNA binding|DNA-binding transcription factor activity, RNA polymerase II-specific|DNA-binding transcription activator activity, RNA polymerase II-specific|endocardial cushion development|endocardial cushion to mesenchymal transition involved in heart valve formation|chromatin binding|nucleus|regulation of transcription by RNA polymerase II…	rno05202,rno05215	Transcriptional misregulation in cancer|Prostate cancer	ETS
Esrp2	1.992271985	0	3.984543971	Inf	Inf	0.256541743	1	0	0.055912009	307810	epithelial splicing regulatory protein 2	GO:0000380,GO:0003723,GO:0003729,GO:0005634,GO:0005654,GO:0043484,GO:0050679,GO:0060441,GO:0060445,GO:1990904	alternative mRNA splicing, via spliceosome|RNA binding|mRNA binding|nucleus|nucleoplasm|regulation of RNA splicing|positive regulation of epithelial cell proliferation|epithelial tube branching involved in lung morphogenesis|branching involved in salivary gland morphogenesis|ribonucleoprotein complex
Exoc1l	0.498067996	0	0.996135993	Inf	Inf	1	1	0	0.040607317	686911		GO:0000145,GO:0005546,GO:0005886,GO:0006887,GO:0006893	exocyst|phosphatidylinositol-4,5-bisphosphate binding|plasma membrane|exocytosis|Golgi to plasma membrane transport
F11	0.498067996	0	0.996135993	Inf	Inf	1	1	0	0.016977726	290757	coagulation factor XI	GO:0004252,GO:0005615,GO:0007596,GO:0030193,GO:0031639,GO:0042802,GO:0051919,GO:0070009	serine-type endopeptidase activity|extracellular space|blood coagulation|regulation of blood coagulation|plasminogen activation|identical protein binding|positive regulation of fibrinolysis|serine-type aminopeptidase activity	rno04610	Complement and coagulation cascades
Fabp9	1.494203989	0	2.988407978	Inf	Inf	0.372732404	1	0	0.200299014	64822	fatty acid binding protein 9	GO:0001669,GO:0001675,GO:0008289	acrosomal vesicle|acrosome assembly|lipid binding
Fam110c	1.992271985	0	3.984543971	Inf	Inf	0.256541743	1	0	0.068718068	500638	family with sequence similarity 110, member C	GO:0000922,GO:0005634,GO:0005815,GO:0005874,GO:0005938,GO:0030335,GO:0043014,GO:0051897,GO:0060491	spindle pole|nucleus|microtubule organizing center|microtubule|cell cortex|positive regulation of cell migration|alpha-tubulin binding|positive regulation of protein kinase B signaling|regulation of cell projection assembly
Fam115e	0.996135993	0	1.992271985	Inf	Inf	0.573868536	1	0	0.034139698	494321	family with sequence similarity 115, member E	GO:0005886,GO:0010359,GO:0010360,GO:0044325,GO:0090314	plasma membrane|regulation of anion channel activity|negative regulation of anion channel activity|ion channel binding|positive regulation of protein targeting to membrane
Fam228a	0.996135993	0	1.992271985	Inf	Inf	0.573868536	1	0	0.068432293	313936	family with sequence similarity 228, member A
Fam48b1	0.498067996	0	0.996135993	Inf	Inf	1	1	0	0.01188705	314107
Fam71a	0.498067996	0	0.996135993	Inf	Inf	1	1	0	0.024520787	498311	family with sequence similarity 71, member A
Fancd2os	0.498067996	0	0.996135993	Inf	Inf	1	1	0	0.033741222	500294	FANCD2 opposite strand
Fbxo24	1.494203989	0	2.988407978	Inf	Inf	0.372732404	1	0	0.080744595	304374	F-box protein 24
Fcar	0.498067996	0	0.996135993	Inf	Inf	1	1	0	0.030700251	365183	Fc fragment of IgA receptor	GO:0002446,GO:0005886,GO:0019766,GO:0019862,GO:0033031,GO:0035457,GO:0038093,GO:0042119,GO:0071222,GO:0071346,GO:0071354,GO:0071356,GO:0097011,GO:1903209	neutrophil mediated immunity|plasma membrane|IgA receptor activity|IgA binding|positive regulation of neutrophil apoptotic process|cellular response to interferon-alpha|Fc receptor signaling pathway|neutrophil activation|cellular response to lipopolysaccharide|cellular response to interferon-gamma|cellular response to interleukin-6|cellular response to tumor necrosis factor|cellular response to g…	rno04145,rno05150	Phagosome|Staphylococcus aureus infection
Fezf1	0.498067996	0	0.996135993	Inf	Inf	1	1	0	0.026887801	500048	Fez family zinc finger 1	GO:0000122,GO:0000976,GO:0000978,GO:0001227,GO:0001764,GO:0003700,GO:0005654,GO:0005829,GO:0006357,GO:0007411,GO:0008285,GO:0021537,GO:0021772,GO:0021797,GO:0030900,GO:0043565,GO:0043697,GO:0045666,GO:0045893,GO:0050767	negative regulation of transcription by RNA polymerase II|transcription cis-regulatory region binding|RNA polymerase II cis-regulatory region sequence-specific DNA binding|DNA-binding transcription repressor activity, RNA polymerase II-specific|neuron migration|DNA-binding transcription factor activity|nucleoplasm|cytosol|regulation of transcription by RNA polymerase II|axon guidance|negative reg…			zf-C2H2
Fgf8	0.498067996	0	0.996135993	Inf	Inf	1	1	0	0.050027911	29349	fibroblast growth factor 8	GO:0000165,GO:0001569,GO:0001656,GO:0001658,GO:0001759,GO:0001822,GO:0001823,GO:0001839,GO:0001934,GO:0001947,GO:0001974,GO:0003007,GO:0003148,GO:0003151,GO:0003198,GO:0005104,GO:0005105,GO:0005111,GO:0005615,GO:0005737,GO:0006979,GO:0007368,GO:0007507,GO:0008045,GO:0008078,GO:0008083,GO:0008284,GO:0008406,GO:0008543,GO:0009792,GO:0009887,GO:0009897,GO:0009953,GO:0010628,GO:0014070,GO:0021537,GO:…	MAPK cascade|branching involved in blood vessel morphogenesis|metanephros development|branching involved in ureteric bud morphogenesis|organ induction|kidney development|mesonephros development|neural plate morphogenesis|positive regulation of protein phosphorylation|heart looping|blood vessel remodeling|heart morphogenesis|outflow tract septum morphogenesis|outflow tract morphogenesis|epithelial…	rno04010,rno04014,rno04015,rno04020,rno04151,rno04810,rno05200,rno05218,rno05224,rno05226	MAPK signaling pathway|Ras signaling pathway|Rap1 signaling pathway|Calcium signaling pathway|PI3K-Akt signaling pathway|Regulation of actin cytoskeleton|Pathways in cancer|Melanoma|Breast cancer|Gastric cancer
Fmo2	0.498067996	0	0.996135993	Inf	Inf	1	1	0	0.026514545	246245	flavin containing dimethylaniline monoxygenase 2	GO:0004497,GO:0004499,GO:0005789,GO:0006082,GO:0006739,GO:0006805,GO:0009404,GO:0016020,GO:0016021,GO:0017144,GO:0050660,GO:0050661,GO:0070995,GO:0072592	monooxygenase activity|N,N-dimethylaniline monooxygenase activity|endoplasmic reticulum membrane|organic acid metabolic process|NADP metabolic process|xenobiotic metabolic process|toxin metabolic process|membrane|integral component of membrane|drug metabolic process|flavin adenine dinucleotide binding|NADP binding|NADPH oxidation|oxygen metabolic process	rno00982	Drug metabolism - cytochrome P450
Foxa1	0.498067996	0	0.996135993	Inf	Inf	1	1	0	0.00561645	25098	forkhead box A1	GO:0000122,GO:0000976,GO:0000978,GO:0000981,GO:0001228,GO:0001650,GO:0003677,GO:0003682,GO:0003690,GO:0003700,GO:0005634,GO:0005654,GO:0005902,GO:0006338,GO:0006357,GO:0007219,GO:0009653,GO:0010468,GO:0010719,GO:0019904,GO:0021904,GO:0030154,GO:0030324,GO:0032355,GO:0033148,GO:0035239,GO:0042445,GO:0042593,GO:0043065,GO:0043565,GO:0045666,GO:0045880,GO:0045931,GO:0045944,GO:0048646,GO:0048665,GO:…	negative regulation of transcription by RNA polymerase II|transcription cis-regulatory region binding|RNA polymerase II cis-regulatory region sequence-specific DNA binding|DNA-binding transcription factor activity, RNA polymerase II-specific|DNA-binding transcription activator activity, RNA polymerase II-specific|fibrillar center|DNA binding|chromatin binding|double-stranded DNA binding|DNA-bindi…			Fork
Foxa3	0.996135993	0	1.992271985	Inf	Inf	0.573868536	1	0	0.049154262	25100	forkhead box A3	GO:0000976,GO:0000978,GO:0000981,GO:0001678,GO:0003677,GO:0003700,GO:0005634,GO:0005654,GO:0006325,GO:0006355,GO:0006357,GO:0007275,GO:0007283,GO:0008285,GO:0009267,GO:0009653,GO:0015629,GO:0019904,GO:0030154,GO:0031667,GO:0043565,GO:0045944,GO:0061484,GO:0070368,GO:1990837	transcription cis-regulatory region binding|RNA polymerase II cis-regulatory region sequence-specific DNA binding|DNA-binding transcription factor activity, RNA polymerase II-specific|cellular glucose homeostasis|DNA binding|DNA-binding transcription factor activity|nucleus|nucleoplasm|chromatin organization|regulation of transcription, DNA-templated|regulation of transcription by RNA polymerase …	rno04950	Maturity onset diabetes of the young	Fork
Foxq1	2.490339982	0	4.980679964	Inf	Inf	0.182708175	1	0	0.101518293	64826	forkhead box Q1	GO:0000122,GO:0000978,GO:0000981,GO:0001227,GO:0005634,GO:0006357,GO:0009653,GO:0030154,GO:0031069,GO:0043524,GO:1990837	negative regulation of transcription by RNA polymerase II|RNA polymerase II cis-regulatory region sequence-specific DNA binding|DNA-binding transcription factor activity, RNA polymerase II-specific|DNA-binding transcription repressor activity, RNA polymerase II-specific|nucleus|regulation of transcription by RNA polymerase II|anatomical structure morphogenesis|cell differentiation|hair follicle m…
Gabrq	3.486475974	0	6.972951949	Inf	Inf	0.098917487	1	0	0.180240182	65187	gamma-aminobutyric acid type A receptor subunit theta	GO:0004890,GO:0005230,GO:0005254,GO:0005887,GO:0007165,GO:0007268,GO:0030594,GO:0034220,GO:0034707,GO:0042391,GO:0043005,GO:0043235,GO:0045202,GO:0045211,GO:0050877,GO:1902476,GO:1902711	GABA-A receptor activity|extracellular ligand-gated ion channel activity|chloride channel activity|integral component of plasma membrane|signal transduction|chemical synaptic transmission|neurotransmitter receptor activity|ion transmembrane transport|chloride channel complex|regulation of membrane potential|neuron projection|receptor complex|synapse|postsynaptic membrane|nervous system process|ch…	rno04080,rno04723,rno04727,rno05032,rno05033	Neuroactive ligand-receptor interaction|Retrograde endocannabinoid signaling|GABAergic synapse|Morphine addiction|Nicotine addiction
Gal	1.992271985	0	3.984543971	Inf	Inf	0.256541743	1	0	0.306036262	29141	galanin and GMAP prepropeptide	GO:0001664,GO:0004966,GO:0005184,GO:0005615,GO:0005737,GO:0005794,GO:0006954,GO:0007218,GO:0007399,GO:0007631,GO:0008285,GO:0010737,GO:0019933,GO:0030141,GO:0031763,GO:0031764,GO:0031765,GO:0031766,GO:0031943,GO:0032868,GO:0035902,GO:0042493,GO:0043025,GO:0043065,GO:0043204,GO:0043627,GO:0044306,GO:0045944,GO:0050672,GO:0050776,GO:0051464,GO:0051795,GO:0090274,GO:0090275,GO:1902608	G protein-coupled receptor binding|galanin receptor activity|neuropeptide hormone activity|extracellular space|cytoplasm|Golgi apparatus|inflammatory response|neuropeptide signaling pathway|nervous system development|feeding behavior|negative regulation of cell population proliferation|protein kinase A signaling|cAMP-mediated signaling|secretory granule|galanin receptor binding|type 1 galanin rec…	rno04080	Neuroactive ligand-receptor interaction
Galp	0.498067996	0	0.996135993	Inf	Inf	1	1	0	0.078416183	64568	galanin-like peptide	GO:0005179,GO:0005576,GO:0007218,GO:0009725,GO:0032098,GO:0032868,GO:0035821,GO:0042595,GO:0050829,GO:0061844	hormone activity|extracellular region|neuropeptide signaling pathway|response to hormone|regulation of appetite|response to insulin|modulation of process of other organism|behavioral response to starvation|defense response to Gram-negative bacterium|antimicrobial humoral immune response mediated by antimicrobial peptide
Gapdhs	0.996135993	0	1.992271985	Inf	Inf	0.573868536	1	0	0.059687318	66020	glyceraldehyde-3-phosphate dehydrogenase, spermatogenic	GO:0001669,GO:0004365,GO:0005737,GO:0005829,GO:0005929,GO:0006006,GO:0006096,GO:0007286,GO:0030317,GO:0031514,GO:0035686,GO:0050661,GO:0051287,GO:0097228	acrosomal vesicle|glyceraldehyde-3-phosphate dehydrogenase (NAD+) (phosphorylating) activity|cytoplasm|cytosol|cilium|glucose metabolic process|glycolytic process|spermatid development|flagellated sperm motility|motile cilium|sperm fibrous sheath|NADP binding|NAD binding|sperm principal piece	rno00010	Glycolysis / Gluconeogenesis
Gata3	0.498067996	0	0.996135993	Inf	Inf	1	1	0	0.022825368	85471	GATA binding protein 3	GO:0000122,GO:0000785,GO:0000902,GO:0000976,GO:0000977,GO:0000978,GO:0000981,GO:0000987,GO:0001227,GO:0001228,GO:0001701,GO:0001709,GO:0001764,GO:0001775,GO:0001806,GO:0001817,GO:0001819,GO:0001822,GO:0001823,GO:0002088,GO:0002520,GO:0002572,GO:0003180,GO:0003215,GO:0003281,GO:0003700,GO:0005134,GO:0005634,GO:0005654,GO:0006338,GO:0006357,GO:0006959,GO:0007165,GO:0007399,GO:0007411,GO:0008270,GO:…	negative regulation of transcription by RNA polymerase II|chromatin|cell morphogenesis|transcription cis-regulatory region binding|RNA polymerase II transcription regulatory region sequence-specific DNA binding|RNA polymerase II cis-regulatory region sequence-specific DNA binding|DNA-binding transcription factor activity, RNA polymerase II-specific|cis-regulatory region sequence-specific DNA bind…	rno04658,rno04659,rno04928,rno05321	Th1 and Th2 cell differentiation|Th17 cell differentiation|Parathyroid hormone synthesis, secretion and action|Inflammatory bowel disease	zf-GATA
Ghsr	0.498067996	0	0.996135993	Inf	Inf	1	1	0	0.039614694	84022	growth hormone secretagogue receptor	GO:0001616,GO:0004930,GO:0005131,GO:0005515,GO:0005886,GO:0007186,GO:0007283,GO:0007565,GO:0007611,GO:0008154,GO:0008343,GO:0009725,GO:0009755,GO:0009986,GO:0010700,GO:0016021,GO:0016520,GO:0017046,GO:0030252,GO:0032094,GO:0032099,GO:0032100,GO:0032354,GO:0032355,GO:0032691,GO:0032715,GO:0032720,GO:0032869,GO:0036321,GO:0040018,GO:0042562,GO:0042802,GO:0043005,GO:0043134,GO:0043568,GO:0045121,GO:…	growth hormone secretagogue receptor activity|G protein-coupled receptor activity|growth hormone receptor binding|protein binding|plasma membrane|G protein-coupled receptor signaling pathway|spermatogenesis|female pregnancy|learning or memory|actin polymerization or depolymerization|adult feeding behavior|response to hormone|hormone-mediated signaling pathway|cell surface|negative regulation of n…	rno04024,rno04080,rno04935	cAMP signaling pathway|Neuroactive ligand-receptor interaction|Growth hormone synthesis, secretion and action
Gimap1	0.498067996	0	0.996135993	Inf	Inf	1	1	0	0.048354283	312312	GTPase, IMAP family member 1	GO:0005525,GO:0005783,GO:0016021,GO:0030183,GO:0030217	GTP binding|endoplasmic reticulum|integral component of membrane|B cell differentiation|T cell differentiation
Gimap5	0.498067996	0	0.996135993	Inf	Inf	1	1	0	0.025998948	246774	GTPase, IMAP family member 5	GO:0001659,GO:0002729,GO:0002925,GO:0005525,GO:0005739,GO:0005765,GO:0010524,GO:0016021,GO:0030217,GO:0032585,GO:0032689,GO:0032831,GO:0043011,GO:0043029,GO:0043066,GO:0045019,GO:0045588,GO:0045838,GO:0045954,GO:0046902,GO:0050868,GO:0050995	temperature homeostasis|positive regulation of natural killer cell cytokine production|positive regulation of humoral immune response mediated by circulating immunoglobulin|GTP binding|mitochondrion|lysosomal membrane|positive regulation of calcium ion transport into cytosol|integral component of membrane|T cell differentiation|multivesicular body membrane|negative regulation of interferon-gamma …
Gimap6	3.984543971	0	7.969087942	Inf	Inf	0.074500754	1	0	0.32241047	297076	GTPase, IMAP family member 6	GO:0005525,GO:0005829	GTP binding|cytosol
Gimap8	0.498067996	0	0.996135993	Inf	Inf	1	1	0	0.016759585	500112	GTPase, IMAP family member 8	GO:0005525,GO:0005739,GO:0005783,GO:0005794,GO:0005829,GO:0070232	GTP binding|mitochondrion|endoplasmic reticulum|Golgi apparatus|cytosol|regulation of T cell apoptotic process
Gja10	0.498067996	0	0.996135993	Inf	Inf	1	1	0	0.017346687	313126	gap junction protein, alpha 10	GO:0005243,GO:0005921,GO:0005922,GO:0007267,GO:0007276,GO:0007416,GO:0009416,GO:0016021,GO:0050908,GO:0055085	gap junction channel activity|gap junction|connexin complex|cell-cell signaling|gamete generation|synapse assembly|response to light stimulus|integral component of membrane|detection of light stimulus involved in visual perception|transmembrane transport
Gjd4	0.498067996	0	0.996135993	Inf	Inf	1	1	0	0.049244785	266707	gap junction protein, delta 4	GO:0005243,GO:0005886,GO:0005922,GO:0007267,GO:0014717,GO:0016021,GO:0055085	gap junction channel activity|plasma membrane|connexin complex|cell-cell signaling|regulation of satellite cell activation involved in skeletal muscle regeneration|integral component of membrane|transmembrane transport
Gkn2	0.498067996	0	0.996135993	Inf	Inf	1	1	0	0.043585849	297419	gastrokine 2	GO:0005615,GO:0009617,GO:0042127,GO:0045178	extracellular space|response to bacterium|regulation of cell population proliferation|basal part of cell
Glp2r	0.498067996	0	0.996135993	Inf	Inf	1	1	0	0.032353198	60432	glucagon-like peptide 2 receptor	GO:0004967,GO:0005886,GO:0007166,GO:0007188,GO:0008528,GO:0016021,GO:0017046,GO:0042592,GO:0071377	glucagon receptor activity|plasma membrane|cell surface receptor signaling pathway|adenylate cyclase-modulating G protein-coupled receptor signaling pathway|G protein-coupled peptide receptor activity|integral component of membrane|peptide hormone binding|homeostatic process|cellular response to glucagon stimulus	rno04080	Neuroactive ligand-receptor interaction
Gngt1	0.498067996	0	0.996135993	Inf	Inf	1	1	0	0.107174021	680149	G protein subunit gamma transducin 1	GO:0001750,GO:0001917,GO:0005834,GO:0007186,GO:0007602,GO:0008104,GO:0031680,GO:0031681,GO:0042462	photoreceptor outer segment|photoreceptor inner segment|heterotrimeric G-protein complex|G protein-coupled receptor signaling pathway|phototransduction|protein localization|G-protein beta/gamma-subunit complex|G-protein beta-subunit binding|eye photoreceptor cell development	rno04014,rno04062,rno04151,rno04371,rno04713,rno04723,rno04724,rno04725,rno04726,rno04727,rno04728,rno04744,rno04926,rno05032,rno05034,rno05163,rno05167,rno05170,rno05200	Ras signaling pathway|Chemokine signaling pathway|PI3K-Akt signaling pathway|Apelin signaling pathway|Circadian entrainment|Retrograde endocannabinoid signaling|Glutamatergic synapse|Cholinergic synapse|Serotonergic synapse|GABAergic synapse|Dopaminergic synapse|Phototransduction|Relaxin signaling pathway|Morphine addiction|Alcoholism|Human cytomegalovirus infection|Kaposi sarcoma-associated herp…
Gp1ba	0.498067996	0	0.996135993	Inf	Inf	1	1	0	0.019977526	691992	glycoprotein Ib platelet subunit alpha	GO:0000902,GO:0005615,GO:0005886,GO:0007155,GO:0007596,GO:0007599,GO:0016020,GO:0016021,GO:0031012,GO:0031362,GO:0042730,GO:0070527	cell morphogenesis|extracellular space|plasma membrane|cell adhesion|blood coagulation|hemostasis|membrane|integral component of membrane|extracellular matrix|anchored component of external side of plasma membrane|fibrinolysis|platelet aggregation	rno04512,rno04611,rno04613,rno04640	ECM-receptor interaction|Platelet activation|Neutrophil extracellular trap formation|Hematopoietic cell lineage
Gpr101	1.494203989	0	2.988407978	Inf	Inf	0.372732404	1	0	0.073394103	317608	G protein-coupled receptor 101	GO:0004930,GO:0005887,GO:0043235,GO:0071880	G protein-coupled receptor activity|integral component of plasma membrane|receptor complex|adenylate cyclase-activating adrenergic receptor signaling pathway
Gpr141	0.996135993	0	1.992271985	Inf	Inf	0.573868536	1	0	0.143763002	291179	G protein-coupled receptor 141	GO:0004930,GO:0007186,GO:0016021	G protein-coupled receptor activity|G protein-coupled receptor signaling pathway|integral component of membrane
Gpr152	0.996135993	0	1.992271985	Inf	Inf	0.573868536	1	0	0.042444315	688884		GO:0016021,GO:0042802	integral component of membrane|identical protein binding
Gpr171	1.494203989	0	2.988407978	Inf	Inf	0.372732404	1	0	0.087195386	688737	G protein-coupled receptor 171	GO:0007186,GO:0016021,GO:0035589,GO:0045028,GO:0045638	G protein-coupled receptor signaling pathway|integral component of membrane|G protein-coupled purinergic nucleotide receptor signaling pathway|G protein-coupled purinergic nucleotide receptor activity|negative regulation of myeloid cell differentiation
Gpr25	0.996135993	0	1.992271985	Inf	Inf	0.573868536	1	0	0.019185592	363993		GO:0004930,GO:0005886,GO:0007186,GO:0016021	G protein-coupled receptor activity|plasma membrane|G protein-coupled receptor signaling pathway|integral component of membrane
Gpr35	6.474883953	0	12.94976791	Inf	Inf	0.020965528	0.603356714	0	0.110989444	367315	G protein-coupled receptor 35	GO:0004930,GO:0005886,GO:0005887,GO:0007010,GO:0007186,GO:0007204,GO:0016494,GO:0035025,GO:0051482,GO:0070098,GO:1901386,GO:1904456	G protein-coupled receptor activity|plasma membrane|integral component of plasma membrane|cytoskeleton organization|G protein-coupled receptor signaling pathway|positive regulation of cytosolic calcium ion concentration|C-X-C chemokine receptor activity|positive regulation of Rho protein signal transduction|positive regulation of cytosolic calcium ion concentration involved in phospholipase C-act…	rno04080	Neuroactive ligand-receptor interaction
Gpx6	0.498067996	0	0.996135993	Inf	Inf	1	1	0	0.046504206	259233	glutathione peroxidase 6	GO:0004601,GO:0004602,GO:0005576,GO:0006979,GO:0098869	peroxidase activity|glutathione peroxidase activity|extracellular region|response to oxidative stress|cellular oxidant detoxification	rno00480,rno00590,rno04918,rno05014,rno05016,rno05022	Glutathione metabolism|Arachidonic acid metabolism|Thyroid hormone synthesis|Amyotrophic lateral sclerosis|Huntington disease|Pathways of neurodegeneration - multiple diseases
Gsc	0.996135993	0	1.992271985	Inf	Inf	0.573868536	1	0	0.092365867	317715	goosecoid homeobox	GO:0000122,GO:0000978,GO:0000981,GO:0001227,GO:0005634,GO:0005667,GO:0006357,GO:0009653,GO:0014036,GO:0021904,GO:0023019,GO:0030178,GO:0030900,GO:0042474,GO:0043583,GO:0048644,GO:0048704,GO:0061629,GO:1990837	negative regulation of transcription by RNA polymerase II|RNA polymerase II cis-regulatory region sequence-specific DNA binding|DNA-binding transcription factor activity, RNA polymerase II-specific|DNA-binding transcription repressor activity, RNA polymerase II-specific|nucleus|transcription regulator complex|regulation of transcription by RNA polymerase II|anatomical structure morphogenesis|neur…			Homeobox
Gsdmc	2.490339982	0	4.980679964	Inf	Inf	0.182708175	1	0	0.174885012	299908	gasdermin C	GO:0001786,GO:0005546,GO:0005737,GO:0005829,GO:0005886,GO:0012501,GO:0016021,GO:0042742,GO:0070269,GO:0070273	phosphatidylserine binding|phosphatidylinositol-4,5-bisphosphate binding|cytoplasm|cytosol|plasma membrane|programmed cell death|integral component of membrane|defense response to bacterium|pyroptosis|phosphatidylinositol-4-phosphate binding
Guca1a	0.498067996	0	0.996135993	Inf	Inf	1	1	0	0.01709167	301233	guanylate cyclase activator 1A	GO:0001750,GO:0001917,GO:0005509,GO:0007601,GO:0007602,GO:0008048,GO:0010753,GO:0016020,GO:0030249,GO:0031282,GO:0031284,GO:0120199	photoreceptor outer segment|photoreceptor inner segment|calcium ion binding|visual perception|phototransduction|calcium sensitive guanylate cyclase activator activity|positive regulation of cGMP-mediated signaling|membrane|guanylate cyclase regulator activity|regulation of guanylate cyclase activity|positive regulation of guanylate cyclase activity|cone photoreceptor outer segment	rno04744	Phototransduction
Gucy2e	0.996135993	0	1.992271985	Inf	Inf	0.573868536	1	0	0.029384526	113911	guanylate cyclase 2E	GO:0001653,GO:0003031,GO:0004383,GO:0004672,GO:0004984,GO:0005515,GO:0005524,GO:0005525,GO:0005549,GO:0005886,GO:0006182,GO:0006468,GO:0007165,GO:0007168,GO:0007608,GO:0008355,GO:0010753,GO:0016021,GO:0016941,GO:0035556,GO:0042048,GO:0050911,GO:0060170,GO:0097730	peptide receptor activity|detection of carbon dioxide|guanylate cyclase activity|protein kinase activity|olfactory receptor activity|protein binding|ATP binding|GTP binding|odorant binding|plasma membrane|cGMP biosynthetic process|protein phosphorylation|signal transduction|receptor guanylyl cyclase signaling pathway|sensory perception of smell|olfactory learning|positive regulation of cGMP-media…	rno00230,rno04740,rno04744	Purine metabolism|Olfactory transduction|Phototransduction
Gucy2f	0.498067996	0	0.996135993	Inf	Inf	1	1	0	0.014314731	116556	guanylate cyclase 2F	GO:0001653,GO:0004383,GO:0004672,GO:0005524,GO:0005525,GO:0005886,GO:0006182,GO:0006468,GO:0007165,GO:0007168,GO:0016020,GO:0016021,GO:0019934,GO:0042802,GO:0044877,GO:0050908,GO:0120200	peptide receptor activity|guanylate cyclase activity|protein kinase activity|ATP binding|GTP binding|plasma membrane|cGMP biosynthetic process|protein phosphorylation|signal transduction|receptor guanylyl cyclase signaling pathway|membrane|integral component of membrane|cGMP-mediated signaling|identical protein binding|protein-containing complex binding|detection of light stimulus involved in vis…	rno00230,rno04744	Purine metabolism|Phototransduction
Gulo	2.490339982	0	4.980679964	Inf	Inf	0.182708175	1	0	0.123853258	60671	gulonolactone (L-) oxidase	GO:0003885,GO:0005789,GO:0016021,GO:0019853,GO:0050105,GO:0050660,GO:0071949	D-arabinono-1,4-lactone oxidase activity|endoplasmic reticulum membrane|integral component of membrane|L-ascorbic acid biosynthetic process|L-gulonolactone oxidase activity|flavin adenine dinucleotide binding|FAD binding	rno00053	Ascorbate and aldarate metabolism
Gvin1	0.996135993	0	1.992271985	Inf	Inf	0.573868536	1	0	0.012637012	499229		GO:0005525,GO:0005634,GO:0005737	GTP binding|nucleus|cytoplasm
H1f1	0.996135993	0	1.992271985	Inf	Inf	0.573868536	1	0	0.143763002	291145	H1.1 linker histone, cluster member	GO:0000785,GO:0000786,GO:0000791,GO:0003677,GO:0003690,GO:0005634,GO:0005654,GO:0006334,GO:0007283,GO:0008201,GO:0009986,GO:0016584,GO:0030261,GO:0031490,GO:0031492,GO:0031936,GO:0031982,GO:0045910,GO:0048260	chromatin|nucleosome|euchromatin|DNA binding|double-stranded DNA binding|nucleus|nucleoplasm|nucleosome assembly|spermatogenesis|heparin binding|cell surface|nucleosome positioning|chromosome condensation|chromatin DNA binding|nucleosomal DNA binding|negative regulation of chromatin silencing|vesicle|negative regulation of DNA recombination|positive regulation of receptor-mediated endocytosis
H2ac1	0.498067996	0	0.996135993	Inf	Inf	1	1	0	0.136081009	24828	H2A clustered histone 1	GO:0000786,GO:0003677,GO:0005634,GO:0006325,GO:0046982	nucleosome|DNA binding|nucleus|chromatin organization|protein heterodimerization activity	rno04217,rno04613,rno05034,rno05322	Necroptosis|Neutrophil extracellular trap formation|Alcoholism|Systemic lupus erythematosus
H2ac20	0.498067996	0	0.996135993	Inf	Inf	1	1	0	0.119909948	499675		GO:0000786,GO:0003677,GO:0005634,GO:0006342,GO:0046982	nucleosome|DNA binding|nucleus|chromatin silencing|protein heterodimerization activity	rno04217,rno04613,rno05034,rno05322	Necroptosis|Neutrophil extracellular trap formation|Alcoholism|Systemic lupus erythematosus
H2ac21	0.498067996	0	0.996135993	Inf	Inf	1	1	0	0.136081009	690102	H2A clustered histone 21	GO:0000786,GO:0003677,GO:0005634,GO:0006342,GO:0046982	nucleosome|DNA binding|nucleus|chromatin silencing|protein heterodimerization activity	rno04217,rno04613,rno05034,rno05322	Necroptosis|Neutrophil extracellular trap formation|Alcoholism|Systemic lupus erythematosus
Hal	0.498067996	0	0.996135993	Inf	Inf	1	1	0	0.025037377	29301	histidine ammonia lyase	GO:0004397,GO:0005829,GO:0006547,GO:0006548,GO:0016841,GO:0019556,GO:0019557	histidine ammonia-lyase activity|cytosol|histidine metabolic process|histidine catabolic process|ammonia-lyase activity|histidine catabolic process to glutamate and formamide|histidine catabolic process to glutamate and formate	rno00340	Histidine metabolism
Has1	0.498067996	0	0.996135993	Inf	Inf	1	1	0	0.021469224	282821	hyaluronan synthase 1	GO:0005737,GO:0005887,GO:0010764,GO:0016020,GO:0030213,GO:0036120,GO:0042802,GO:0044849,GO:0045226,GO:0050501,GO:0085029	cytoplasm|integral component of plasma membrane|negative regulation of fibroblast migration|membrane|hyaluronan biosynthetic process|cellular response to platelet-derived growth factor stimulus|identical protein binding|estrous cycle|extracellular polysaccharide biosynthetic process|hyaluronan synthase activity|extracellular matrix assembly
Hbe2	0.996135993	0	1.992271985	Inf	Inf	0.573868536	1	0	0.240900165	502359	hemoglobin, epsilon 2	GO:0004601,GO:0005344,GO:0005833,GO:0015671,GO:0019825,GO:0020037,GO:0031720,GO:0031721,GO:0031838,GO:0042744,GO:0043177,GO:0046872,GO:0098869	peroxidase activity|oxygen carrier activity|hemoglobin complex|oxygen transport|oxygen binding|heme binding|haptoglobin binding|hemoglobin alpha binding|haptoglobin-hemoglobin complex|hydrogen peroxide catabolic process|organic acid binding|metal ion binding|cellular oxidant detoxification
Hbq1	0.498067996	0	0.996135993	Inf	Inf	1	1	0	0.080420807	303007
Hhipl2	0.498067996	0	0.996135993	Inf	Inf	1	1	0	0.019814686	317051		GO:0003824	catalytic activity
Hhla2	1.494203989	0	2.988407978	Inf	Inf	0.372732404	1	0	0.073059886	108352332		GO:0001819,GO:0031295,GO:0042104	positive regulation of cytokine production|T cell costimulation|positive regulation of activated T cell proliferation
Hormad1	0.498067996	0	0.996135993	Inf	Inf	1	1	0	0.02264176	365868	HORMA domain containing 1	GO:0000794,GO:0000795,GO:0001824,GO:0005634,GO:0005694,GO:0005737,GO:0007129,GO:0007130,GO:0007283,GO:0042138,GO:0048477,GO:0051177,GO:0051321,GO:0051598,GO:0060629	condensed nuclear chromosome|synaptonemal complex|blastocyst development|nucleus|chromosome|cytoplasm|homologous chromosome pairing at meiosis|synaptonemal complex assembly|spermatogenesis|meiotic DNA double-strand break formation|oogenesis|meiotic sister chromatid cohesion|meiotic cell cycle|meiotic recombination checkpoint signaling|regulation of homologous chromosome segregation
Hoxa2	0.996135993	0	1.992271985	Inf	Inf	0.573868536	1	0	0.034414309	103690123	homeo box A2
Hoxa5	0.996135993	0	1.992271985	Inf	Inf	0.573868536	1	0	0.036405607	79241	homeo box A5	GO:0000978,GO:0000981,GO:0001228,GO:0001501,GO:0002009,GO:0003016,GO:0003677,GO:0003700,GO:0005634,GO:0006357,GO:0007275,GO:0007389,GO:0007585,GO:0009952,GO:0010628,GO:0016477,GO:0016525,GO:0030324,GO:0030878,GO:0033599,GO:0035264,GO:0043065,GO:0045639,GO:0045647,GO:0045944,GO:0048286,GO:0048704,GO:0048706,GO:0060435,GO:0060439,GO:0060441,GO:0060480,GO:0060481,GO:0060484,GO:0060535,GO:0060536,GO:…	RNA polymerase II cis-regulatory region sequence-specific DNA binding|DNA-binding transcription factor activity, RNA polymerase II-specific|DNA-binding transcription activator activity, RNA polymerase II-specific|skeletal system development|morphogenesis of an epithelium|respiratory system process|DNA binding|DNA-binding transcription factor activity|nucleus|regulation of transcription by RNA pol…			Homeobox
Hoxb13	1.494203989	0	2.988407978	Inf	Inf	0.372732404	1	0	0.119108768	303480	homeo box B13	GO:0000122,GO:0000978,GO:0000981,GO:0001227,GO:0001525,GO:0002009,GO:0005654,GO:0005667,GO:0006357,GO:0008327,GO:0030850,GO:0033574,GO:0040008,GO:0043565,GO:0060527,GO:0060743,GO:1990837	negative regulation of transcription by RNA polymerase II|RNA polymerase II cis-regulatory region sequence-specific DNA binding|DNA-binding transcription factor activity, RNA polymerase II-specific|DNA-binding transcription repressor activity, RNA polymerase II-specific|angiogenesis|morphogenesis of an epithelium|nucleoplasm|transcription regulator complex|regulation of transcription by RNA polym…			Homeobox
Hoxb4	0.498067996	0	0.996135993	Inf	Inf	1	1	0	0.030231677	497988	homeo box B4	GO:0000122,GO:0000978,GO:0000981,GO:0002011,GO:0003677,GO:0005634,GO:0005654,GO:0005813,GO:0006357,GO:0008283,GO:0009952,GO:0030097,GO:0045944,GO:0048103,GO:0048536,GO:0048539,GO:0048704,GO:0048705,GO:0060216,GO:0060218,GO:1990837,GO:2000738	negative regulation of transcription by RNA polymerase II|RNA polymerase II cis-regulatory region sequence-specific DNA binding|DNA-binding transcription factor activity, RNA polymerase II-specific|morphogenesis of an epithelial sheet|DNA binding|nucleus|nucleoplasm|centrosome|regulation of transcription by RNA polymerase II|cell population proliferation|anterior/posterior pattern specification|h…			Homeobox
Hspb9	0.996135993	0	1.992271985	Inf	Inf	0.573868536	1	0	0.16557225	363681	heat shock protein family B (small) member 9	GO:0005634,GO:0005737	nucleus|cytoplasm
Htr3b	1.494203989	0	2.988407978	Inf	Inf	0.372732404	1	0	0.119197259	58963	5-hydroxytryptamine receptor 3B	GO:0004888,GO:0005887,GO:0007165,GO:0007210,GO:0007268,GO:0009986,GO:0022850,GO:0030424,GO:0030594,GO:0032414,GO:0034220,GO:0042391,GO:0043005,GO:0043025,GO:0045202,GO:0045211,GO:0050877,GO:0071363,GO:1904602	transmembrane signaling receptor activity|integral component of plasma membrane|signal transduction|serotonin receptor signaling pathway|chemical synaptic transmission|cell surface|serotonin-gated cation-selective channel activity|axon|neurotransmitter receptor activity|positive regulation of ion transmembrane transporter activity|ion transmembrane transport|regulation of membrane potential|neuro…	rno04726,rno04742	Serotonergic synapse|Taste transduction
Hus1b	0.498067996	0	0.996135993	Inf	Inf	1	1	0	0.064356001	691382	HUS1 checkpoint clamp component B
Igfn1	0.996135993	0	1.992271985	Inf	Inf	0.573868536	1	0	0.012201651	304823		GO:0005634,GO:0007156,GO:0007416,GO:0010842,GO:0030018,GO:0045202	nucleus|homophilic cell adhesion via plasma membrane adhesion molecules|synapse assembly|retina layer formation|Z disc|synapse
Igsf7	1.494203989	0	2.988407978	Inf	Inf	0.372732404	1	0	0.126330323	287813
Il19	0.996135993	0	1.992271985	Inf	Inf	0.573868536	1	0	0.013175619	681145		GO:0005576,GO:0010989,GO:0016021,GO:0072593,GO:2001235,GO:2001237,GO:2001244	extracellular region|negative regulation of low-density lipoprotein particle clearance|integral component of membrane|reactive oxygen species metabolic process|positive regulation of apoptotic signaling pathway|negative regulation of extrinsic apoptotic signaling pathway|positive regulation of intrinsic apoptotic signaling pathway	rno04060,rno04061,rno04630	Cytokine-cytokine receptor interaction|Viral protein interaction with cytokine and cytokine receptor|JAK-STAT signaling pathway
Il20	0.498067996	0	0.996135993	Inf	Inf	1	1	0	0.045245209	681112	interleukin 20	GO:0005125,GO:0005615,GO:0007165,GO:0045517,GO:0045518,GO:0045672	cytokine activity|extracellular space|signal transduction|interleukin-20 receptor binding|interleukin-22 receptor binding|positive regulation of osteoclast differentiation	rno04060,rno04061,rno04630	Cytokine-cytokine receptor interaction|Viral protein interaction with cytokine and cytokine receptor|JAK-STAT signaling pathway
Il2rb	0.996135993	0	1.992271985	Inf	Inf	0.573868536	1	0	0.040684547	25746	interleukin 2 receptor subunit beta	GO:0004896,GO:0004911,GO:0005886,GO:0009897,GO:0009986,GO:0016021,GO:0019221,GO:0019976,GO:0030101,GO:0035723,GO:0038110,GO:0042010,GO:0043066,GO:0050766	cytokine receptor activity|interleukin-2 receptor activity|plasma membrane|external side of plasma membrane|cell surface|integral component of membrane|cytokine-mediated signaling pathway|interleukin-2 binding|natural killer cell activation|interleukin-15-mediated signaling pathway|interleukin-2-mediated signaling pathway|interleukin-15 receptor activity|negative regulation of apoptotic process|p…	rno04060,rno04061,rno04144,rno04151,rno04630,rno04658,rno04659,rno05162,rno05166,rno05200,rno05202	Cytokine-cytokine receptor interaction|Viral protein interaction with cytokine and cytokine receptor|Endocytosis|PI3K-Akt signaling pathway|JAK-STAT signaling pathway|Th1 and Th2 cell differentiation|Th17 cell differentiation|Measles|Human T-cell leukemia virus 1 infection|Pathways in cancer|Transcriptional misregulation in cancer
Il3	0.498067996	0	0.996135993	Inf	Inf	1	1	0	0.099404901	24495	interleukin 3	GO:0001558,GO:0001666,GO:0001934,GO:0002763,GO:0005125,GO:0005135,GO:0005615,GO:0006110,GO:0006955,GO:0007165,GO:0008083,GO:0008284,GO:0009725,GO:0010468,GO:0010507,GO:0019221,GO:0030097,GO:0030224,GO:0033026,GO:0033028,GO:0035162,GO:0035304,GO:0038156,GO:0042531,GO:0042976,GO:0043066,GO:0046330,GO:0050731,GO:0070668,GO:0097192	regulation of cell growth|response to hypoxia|positive regulation of protein phosphorylation|positive regulation of myeloid leukocyte differentiation|cytokine activity|interleukin-3 receptor binding|extracellular space|regulation of glycolytic process|immune response|signal transduction|growth factor activity|positive regulation of cell population proliferation|response to hormone|regulation of g…	rno04060,rno04151,rno04210,rno04630,rno04640,rno04664,rno05200,rno05202,rno05221,rno05310	Cytokine-cytokine receptor interaction|PI3K-Akt signaling pathway|Apoptosis|JAK-STAT signaling pathway|Hematopoietic cell lineage|Fc epsilon RI signaling pathway|Pathways in cancer|Transcriptional misregulation in cancer|Acute myeloid leukemia|Asthma
Il31ra	0.498067996	0	0.996135993	Inf	Inf	1	1	0	0.008356224	688622	interleukin 31 receptor A	GO:0002067,GO:0002438,GO:0004896,GO:0007259,GO:0008284,GO:0009897,GO:0019221,GO:0019955,GO:0030224,GO:0042531,GO:0043235,GO:0051916,GO:0098542	glandular epithelial cell differentiation|acute inflammatory response to antigenic stimulus|cytokine receptor activity|receptor signaling pathway via JAK-STAT|positive regulation of cell population proliferation|external side of plasma membrane|cytokine-mediated signaling pathway|cytokine binding|monocyte differentiation|positive regulation of tyrosine phosphorylation of STAT protein|receptor com…	rno04060	Cytokine-cytokine receptor interaction
Il9r	0.996135993	0	1.992271985	Inf	Inf	0.573868536	1	0	0.02105091	24500	interleukin 9 receptor	GO:0004919,GO:0016021,GO:0019983,GO:0030307,GO:0038113	interleukin-9 receptor activity|integral component of membrane|interleukin-9 binding|positive regulation of cell growth|interleukin-9-mediated signaling pathway	rno04060,rno04630,rno04640	Cytokine-cytokine receptor interaction|JAK-STAT signaling pathway|Hematopoietic cell lineage
Inhbe	0.498067996	0	0.996135993	Inf	Inf	1	1	0	0.050788069	83711	inhibin subunit beta E	GO:0005125,GO:0005179,GO:0005576,GO:0005615,GO:0007165,GO:0008083,GO:0010862,GO:0060395	cytokine activity|hormone activity|extracellular region|extracellular space|signal transduction|growth factor activity|positive regulation of pathway-restricted SMAD protein phosphorylation|SMAD protein signal transduction	rno04060,rno04350,rno04550	Cytokine-cytokine receptor interaction|TGF-beta signaling pathway|Signaling pathways regulating pluripotency of stem cells
Iqca1l	0.498067996	0	0.996135993	Inf	Inf	1	1	0	0.019999939	499971	IQ motif containing with AAA domain 1 like	GO:0005524	ATP binding
Iqcf3	0.498067996	0	0.996135993	Inf	Inf	1	1	0	0.026699869	501050	IQ motif containing F3	GO:0005516	calmodulin binding
Izumo1	1.494203989	0	2.988407978	Inf	Inf	0.372732404	1	0	0.086817917	499152	izumo sperm-egg fusion 1	GO:0001669,GO:0002080,GO:0005102,GO:0005886,GO:0007338,GO:0007342,GO:0016021,GO:0034113,GO:0035036,GO:0042802,GO:0042803,GO:0086080	acrosomal vesicle|acrosomal membrane|signaling receptor binding|plasma membrane|single fertilization|fusion of sperm to egg plasma membrane involved in single fertilization|integral component of membrane|heterotypic cell-cell adhesion|sperm-egg recognition|identical protein binding|protein homodimerization activity|protein binding involved in heterotypic cell-cell adhesion
Jaml	15.93817588	0	31.87635177	Inf	Inf	0.000566945	0.049853958	0	1.200950719	315610		GO:0005178,GO:0005654,GO:0005886,GO:0005923,GO:0007157,GO:0016021,GO:0030593,GO:0035696,GO:0042803,GO:0046629,GO:0050839,GO:0060054,GO:0072672	integrin binding|nucleoplasm|plasma membrane|bicellular tight junction|heterophilic cell-cell adhesion via plasma membrane cell adhesion molecules|integral component of membrane|neutrophil chemotaxis|monocyte extravasation|protein homodimerization activity|gamma-delta T cell activation|cell adhesion molecule binding|positive regulation of epithelial cell proliferation involved in wound healing|ne…
Kera	0.996135993	0	1.992271985	Inf	Inf	0.573868536	1	0	0.054239185	314771	keratocan	GO:0005615,GO:0061303	extracellular space|cornea development in camera-type eye
Klhl34	0.498067996	0	0.996135993	Inf	Inf	1	1	0	0.007068443	302703
Klk8	0.498067996	0	0.996135993	Inf	Inf	1	1	0	0.041075143	308565	kallikrein related-peptidase 8	GO:0004252,GO:0005615,GO:0005737,GO:0006508,GO:0007613,GO:0008219,GO:0009611,GO:0030141,GO:0031642,GO:0043616,GO:0048681,GO:0048812,GO:0050807,GO:0050808,GO:0097180	serine-type endopeptidase activity|extracellular space|cytoplasm|proteolysis|memory|cell death|response to wounding|secretory granule|negative regulation of myelination|keratinocyte proliferation|negative regulation of axon regeneration|neuron projection morphogenesis|regulation of synapse organization|synapse organization|serine protease inhibitor complex
Klra5	3.486475974	0	6.972951949	Inf	Inf	0.098917487	1	0	0.161014562	297666	killer cell lectin-like receptor, subfamily A, member 5	GO:0016021,GO:0030101	integral component of membrane|natural killer cell activation
Krt23	1.494203989	0	2.988407978	Inf	Inf	0.372732404	1	0	0.126429874	287678	keratin 23	GO:0005198,GO:0005882	structural molecule activity|intermediate filament	rno04915,rno05150	Estrogen signaling pathway|Staphylococcus aureus infection
Krt24	0.996135993	0	1.992271985	Inf	Inf	0.573868536	1	0	0.072465903	287675	keratin 24	GO:0005200,GO:0005882,GO:0007010,GO:0045095,GO:0045103	structural constituent of cytoskeleton|intermediate filament|cytoskeleton organization|keratin filament|intermediate filament-based process	rno04915,rno05150	Estrogen signaling pathway|Staphylococcus aureus infection
Krt28	1.494203989	0	2.988407978	Inf	Inf	0.372732404	1	0	0.074796974	360623	keratin 28	GO:0005198,GO:0005882	structural molecule activity|intermediate filament	rno04915,rno05150	Estrogen signaling pathway|Staphylococcus aureus infection
Krt86	0.996135993	0	1.992271985	Inf	Inf	0.573868536	1	0	0.055219243	407760	keratin 86	GO:0045095	keratin filament
LOC100302465	0.498067996	0	0.996135993	Inf	Inf	1	1	0	0.00946881	100302465	hypothetical LOC100302465	GO:0000209,GO:0005654,GO:0005737,GO:0005813,GO:0005814,GO:0005829,GO:0005886,GO:0006974,GO:0007095,GO:0008017,GO:0009411,GO:0010212,GO:0015629,GO:0016567,GO:0030308,GO:0042826,GO:0046599,GO:0050821,GO:0061630	protein polyubiquitination|nucleoplasm|cytoplasm|centrosome|centriole|cytosol|plasma membrane|cellular response to DNA damage stimulus|mitotic G2 DNA damage checkpoint signaling|microtubule binding|response to UV|response to ionizing radiation|actin cytoskeleton|protein ubiquitination|negative regulation of cell growth|histone deacetylase binding|regulation of centriole replication|protein stabil…
LOC100360601	0.498067996	0	0.996135993	Inf	Inf	1	1	0	0.038063941	100360601				rno00590,rno00790,rno00980,rno05204	Arachidonic acid metabolism|Folate biosynthesis|Metabolism of xenobiotics by cytochrome P450|Chemical carcinogenesis
LOC100361693	0.996135993	0	1.992271985	Inf	Inf	0.573868536	1	0	0.034041908	100361693
LOC100361907	0.498067996	0	0.996135993	Inf	Inf	1	1	0	0.017053519	100361907				rno04610	Complement and coagulation cascades
LOC100909643	0.996135993	0	1.992271985	Inf	Inf	0.573868536	1	0	0.047495414	100909643
LOC100911668	0.498067996	0	0.996135993	Inf	Inf	1	1	0	0.006411682	100911668		GO:0000978,GO:0000981,GO:0005634,GO:0006357	RNA polymerase II cis-regulatory region sequence-specific DNA binding|DNA-binding transcription factor activity, RNA polymerase II-specific|nucleus|regulation of transcription by RNA polymerase II	rno05202	Transcriptional misregulation in cancer
LOC100912195	0.996135993	0	1.992271985	Inf	Inf	0.573868536	1	0	0.027085255	100912195		GO:0005102,GO:0005634,GO:0005737,GO:0007165,GO:0031103,GO:0061564	signaling receptor binding|nucleus|cytoplasm|signal transduction|axon regeneration|axon development
LOC100912314	0.498067996	0	0.996135993	Inf	Inf	1	1	0	0.017080753	100912314		GO:0051607	defense response to virus	rno04060,rno04151,rno04217,rno04620,rno04621,rno04622,rno04623,rno04630,rno04650,rno05152,rno05160,rno05161,rno05162,rno05163,rno05164,rno05165,rno05167,rno05168,rno05169,rno05170,rno05171,rno05200,rno05320,rno05417	Cytokine-cytokine receptor interaction|PI3K-Akt signaling pathway|Necroptosis|Toll-like receptor signaling pathway|NOD-like receptor signaling pathway|RIG-I-like receptor signaling pathway|Cytosolic DNA-sensing pathway|JAK-STAT signaling pathway|Natural killer cell mediated cytotoxicity|Tuberculosis|Hepatitis C|Hepatitis B|Measles|Human cytomegalovirus infection|Influenza A|Human papillomavirus i…
LOC100912436	2.988407978	0	5.976815956	Inf	Inf	0.133236696	1	0	0.381091473	100912436
LOC100912568	0.498067996	0	0.996135993	Inf	Inf	1	1	0	0.030577379	100912568
LOC102547011	0.996135993	0	1.992271985	Inf	Inf	0.573868536	1	0	0.020369391	102547011
LOC102547093	0.996135993	0	1.992271985	Inf	Inf	0.573868536	1	0	0.045379581	102547093
LOC102547284	0.996135993	0	1.992271985	Inf	Inf	0.573868536	1	0	0.124227263	102547284
LOC102548890	1.494203989	0	2.988407978	Inf	Inf	0.372732404	1	0	0.313971644	102548890
LOC102549291	0.498067996	0	0.996135993	Inf	Inf	1	1	0	0.006259344	102549291		GO:0006355	regulation of transcription, DNA-templated
LOC102549362	1.494203989	0	2.988407978	Inf	Inf	0.372732404	1	0	0.126729471	102549362
LOC102550203	0.498067996	0	0.996135993	Inf	Inf	1	1	0	0.166086449	102550203
LOC102550604	0.996135993	0	1.992271985	Inf	Inf	0.573868536	1	0	0.0061855	102550604
LOC102551102	0.498067996	0	0.996135993	Inf	Inf	1	1	0	0.044381607	102551102
LOC102551309	1.494203989	0	2.988407978	Inf	Inf	0.372732404	1	0	0.03140331	102551309
LOC102551882	0.996135993	0	1.992271985	Inf	Inf	0.573868536	1	0	0.040777611	102551882
LOC102552269	0.498067996	0	0.996135993	Inf	Inf	1	1	0	0.003862755	102552269
LOC102552286	0.996135993	0	1.992271985	Inf	Inf	0.573868536	1	0	0.054074658	102552286
LOC102552318	0.996135993	0	1.992271985	Inf	Inf	0.573868536	1	0	0.043568095	102552318
LOC102552651	0.498067996	0	0.996135993	Inf	Inf	1	1	0	0.195896838	102552651		GO:0001533,GO:0031424	cornified envelope|keratinization
LOC102552940	0.996135993	0	1.992271985	Inf	Inf	0.573868536	1	0	0.391793676	102552940
LOC102554231	0.498067996	0	0.996135993	Inf	Inf	1	1	0	0.029793781	102554231		GO:0016021	integral component of membrane
LOC102554448	0.498067996	0	0.996135993	Inf	Inf	1	1	0	0.083301926	102554448
LOC102555573	0.996135993	0	1.992271985	Inf	Inf	0.573868536	1	0	0.0829788	102555573
LOC102556178	0.498067996	0	0.996135993	Inf	Inf	1	1	0	0.030403546	102556178
LOC103690326	3.486475974	0	6.972951949	Inf	Inf	0.098917487	1	0	0.29361479	103690326		GO:0005789,GO:0009986,GO:0010008,GO:0016021,GO:0030176,GO:0030308,GO:0030316,GO:0034241,GO:0036006,GO:0043011,GO:0045657,GO:0045780,GO:0061025,GO:0071353,GO:0071356,GO:0072675	endoplasmic reticulum membrane|cell surface|endosome membrane|integral component of membrane|integral component of endoplasmic reticulum membrane|negative regulation of cell growth|osteoclast differentiation|positive regulation of macrophage fusion|cellular response to macrophage colony-stimulating factor stimulus|myeloid dendritic cell differentiation|positive regulation of monocyte differentiat…
LOC103690851	0.996135993	0	1.992271985	Inf	Inf	0.573868536	1	0	0.232016645	103690851
LOC103691107	0.996135993	0	1.992271985	Inf	Inf	0.573868536	1	0	0.235076205	103691107		GO:0008137,GO:0016021,GO:0022900	NADH dehydrogenase (ubiquinone) activity|integral component of membrane|electron transport chain
LOC103691634	0.498067996	0	0.996135993	Inf	Inf	1	1	0	0.074174531	103691634
LOC103691988	2.988407978	0	5.976815956	Inf	Inf	0.133236696	1	0	0.075983666	103691988
LOC103692071	0.996135993	0	1.992271985	Inf	Inf	0.573868536	1	0	0.108368463	103692071
LOC103692210	0.996135993	0	1.992271985	Inf	Inf	0.573868536	1	0	0.244200168	103692210
LOC103692755	0.498067996	0	0.996135993	Inf	Inf	1	1	0	0.053694615	103692755				rno04550	Signaling pathways regulating pluripotency of stem cells
LOC103692831	0.498067996	0	0.996135993	Inf	Inf	1	1	0	0.147327374	103692831				rno03010,rno05171	Ribosome|Coronavirus disease - COVID-19
LOC103693798	5.47874796	0	10.95749592	Inf	Inf	0.033967127	0.788097051	0	0.361128425	103693798
LOC103693953	0.996135993	0	1.992271985	Inf	Inf	0.573868536	1	0	0.046585224	103693953
LOC103694036	0.498067996	0	0.996135993	Inf	Inf	1	1	0	0.082530612	103694036
LOC103694360	0.996135993	0	1.992271985	Inf	Inf	0.573868536	1	0	0.01929287	103694360
LOC103695172	1.494203989	0	2.988407978	Inf	Inf	0.372732404	1	0	0.2291993	103695172	uncharacterized LOC103695172	GO:0007021,GO:0007023,GO:0048487	tubulin complex assembly|post-chaperonin tubulin folding pathway|beta-tubulin binding
LOC108348409	0.498067996	0	0.996135993	Inf	Inf	1	1	0	0.103044001	108348409		GO:0006412	translation
LOC108348437	0.996135993	0	1.992271985	Inf	Inf	0.573868536	1	0	0.108149316	108348437
LOC108348980	0.498067996	0	0.996135993	Inf	Inf	1	1	0	0.156373792	108348980
LOC108349468	0.498067996	0	0.996135993	Inf	Inf	1	1	0	0.034817602	108349468		GO:0006355	regulation of transcription, DNA-templated
LOC108350839	0.498067996	0	0.996135993	Inf	Inf	1	1	0	0.024375495	108350839		GO:0002250,GO:0005576,GO:0005634,GO:0005694,GO:0005793,GO:0005886,GO:0006281,GO:0006310,GO:0006914,GO:0006935,GO:0006954,GO:0045087	adaptive immune response|extracellular region|nucleus|chromosome|endoplasmic reticulum-Golgi intermediate compartment|plasma membrane|DNA repair|DNA recombination|autophagy|chemotaxis|inflammatory response|innate immune response	rno03410,rno04140,rno04217,rno04613	Base excision repair|Autophagy - animal|Necroptosis|Neutrophil extracellular trap formation
LOC108351821	0.996135993	0	1.992271985	Inf	Inf	0.573868536	1	0	0.10334268	108351821
LOC108352143	0.498067996	0	0.996135993	Inf	Inf	1	1	0	0.031644874	108352143
LOC108352309	1.494203989	0	2.988407978	Inf	Inf	0.372732404	1	0	0.510953854	108352309
LOC108352618	0.498067996	0	0.996135993	Inf	Inf	1	1	0	0.03579641	108352618
LOC108352834	0.996135993	0	1.992271985	Inf	Inf	0.573868536	1	0	0.225653319	108352834
LOC108353263	0.996135993	0	1.992271985	Inf	Inf	0.573868536	1	0	0.057878611	108353263
LOC120093089	0.498067996	0	0.996135993	Inf	Inf	1	1	0	0.029287972	120093089		GO:0016021	integral component of membrane
LOC120093102	1.992271985	0	3.984543971	Inf	Inf	0.256541743	1	0	0.066620787	120093102
LOC120093117	0.498067996	0	0.996135993	Inf	Inf	1	1	0	0.065458796	120093117
LOC120093238	0.498067996	0	0.996135993	Inf	Inf	1	1	0	0.034020252	120093238
LOC120093597	0.498067996	0	0.996135993	Inf	Inf	1	1	0	0.009594517	120093597
LOC120093742	0.996135993	0	1.992271985	Inf	Inf	0.573868536	1	0	0.060497553	120093742
LOC120093786	0.996135993	0	1.992271985	Inf	Inf	0.573868536	1	0	0.066558602	120093786
LOC120093833	0.498067996	0	0.996135993	Inf	Inf	1	1	0	0.056954033	120093833
LOC120094611	0.498067996	0	0.996135993	Inf	Inf	1	1	0	0.017397475	120094611
LOC120095898	0.498067996	0	0.996135993	Inf	Inf	1	1	0	0.014720572	120095898
LOC120095955	0.498067996	0	0.996135993	Inf	Inf	1	1	0	0.012422726	120095955
LOC120096526	0.498067996	0	0.996135993	Inf	Inf	1	1	0	0.062917455	120096526
LOC120096936	1.494203989	0	2.988407978	Inf	Inf	0.372732404	1	0	0.113786887	120096936
LOC120098200	0.996135993	0	1.992271985	Inf	Inf	0.573868536	1	0	0.053213768	120098200
LOC120098491	0.996135993	0	1.992271985	Inf	Inf	0.573868536	1	0	0.091732138	120098491
LOC120098581	0.996135993	0	1.992271985	Inf	Inf	0.573868536	1	0	0.043692677	120098581
LOC120098792	0.498067996	0	0.996135993	Inf	Inf	1	1	0	0.020037406	120098792
LOC120099279	1.494203989	0	2.988407978	Inf	Inf	0.372732404	1	0	0.374858669	120099279
LOC120099587	0.498067996	0	0.996135993	Inf	Inf	1	1	0	0.012648968	120099587
LOC120099620	0.996135993	0	1.992271985	Inf	Inf	0.573868536	1	0	0.009840802	120099620
LOC120099697	0.498067996	0	0.996135993	Inf	Inf	1	1	0	0.084220215	120099697
LOC120099849	2.988407978	0	5.976815956	Inf	Inf	0.133236696	1	0	0.062683927	120099849
LOC120100003	1.494203989	0	2.988407978	Inf	Inf	0.372732404	1	0	0.050868583	120100003
LOC120100043	0.996135993	0	1.992271985	Inf	Inf	0.573868536	1	0	0.135735626	120100043
LOC120100076	3.486475974	0	6.972951949	Inf	Inf	0.098917487	1	0	0.189165668	120100076
LOC120100082	0.498067996	0	0.996135993	Inf	Inf	1	1	0	0.080663404	120100082
LOC120100584	0.498067996	0	0.996135993	Inf	Inf	1	1	0	0.244200168	120100584
LOC120100705	0.498067996	0	0.996135993	Inf	Inf	1	1	0	0.014830792	120100705
LOC120101052	0.996135993	0	1.992271985	Inf	Inf	0.573868536	1	0	0.173073905	120101052
LOC120101650	0.996135993	0	1.992271985	Inf	Inf	0.573868536	1	0	0.228546311	120101650
LOC120102411	0.498067996	0	0.996135993	Inf	Inf	1	1	0	0.026318817	120102411
LOC120102453	0.498067996	0	0.996135993	Inf	Inf	1	1	0	0.091418524	120102453
LOC120103072	0.498067996	0	0.996135993	Inf	Inf	1	1	0	0.024554562	120103072
LOC120103562	1.992271985	0	3.984543971	Inf	Inf	0.256541743	1	0	0.071833226	120103562
LOC120103612	0.498067996	0	0.996135993	Inf	Inf	1	1	0	0.012379592	120103612
LOC298795	0.498067996	0	0.996135993	Inf	Inf	1	1	0	0.041586187	298795	similar to 14-3-3 protein sigma	GO:0005737	cytoplasm	rno04110,rno04115,rno04960	Cell cycle|p53 signaling pathway|Aldosterone-regulated sodium reabsorption
LOC309927	0.498067996	0	0.996135993	Inf	Inf	1	1	0	0.123795918	309927
LOC316124	0.498067996	0	0.996135993	Inf	Inf	1	1	0	0.018745123	316124	similar to gonadotropin-regulated long chain acyl-CoA synthetase	GO:0004467,GO:0005737,GO:0016405,GO:0042759	long-chain fatty acid-CoA ligase activity|cytoplasm|CoA-ligase activity|long-chain fatty acid biosynthetic process	rno00061,rno00071,rno03320,rno04920	Fatty acid biosynthesis|Fatty acid degradation|PPAR signaling pathway|Adipocytokine signaling pathway
LOC497796	0.498067996	0	0.996135993	Inf	Inf	1	1	0	0.042955692	497796	hypothetical protein LOC497796	GO:0016021	integral component of membrane
LOC498465	0.498067996	0	0.996135993	Inf	Inf	1	1	0	0.041748506	498465
LOC498592	0.498067996	0	0.996135993	Inf	Inf	1	1	0	0.107174021	498592	similar to CG32662-PA
LOC500354	0.498067996	0	0.996135993	Inf	Inf	1	1	0	0.026113202	500354	similar to C030030A07Rik protein
LOC500371	1.494203989	0	2.988407978	Inf	Inf	0.372732404	1	0	0.100778587	500371
LOC501618	0.498067996	0	0.996135993	Inf	Inf	1	1	0	0.159166181	501618	LRRGT00179
LOC679924	3.486475974	0	6.972951949	Inf	Inf	0.098917487	1	0	0.057851778	679924
LOC681182	3.486475974	0	6.972951949	Inf	Inf	0.098917487	1	0	0.164048579	681182		GO:0016021,GO:0042288	integral component of membrane|MHC class I protein binding	rno05168	Herpes simplex virus 1 infection
LOC681300	0.498067996	0	0.996135993	Inf	Inf	1	1	0	0.037741593	681300
LOC684976	0.498067996	0	0.996135993	Inf	Inf	1	1	0	0.047243672	684976
LOC685173	0.498067996	0	0.996135993	Inf	Inf	1	1	0	0.058898499	685173
LOC685183	0.498067996	0	0.996135993	Inf	Inf	1	1	0	0.032431678	685183
LOC685716	0.498067996	0	0.996135993	Inf	Inf	1	1	0	0.025736206	685716		GO:0016021	integral component of membrane
LOC686151	0.996135993	0	1.992271985	Inf	Inf	0.573868536	1	0	0.080360386	686151
LOC687707	0.498067996	0	0.996135993	Inf	Inf	1	1	0	0.061826401	687707	hypothetical protein LOC687707
LOC688282	1.494203989	0	2.988407978	Inf	Inf	0.372732404	1	0	0.063717041	688282		GO:0002313,GO:0004888,GO:0005615,GO:0005887,GO:0007166,GO:0050776,GO:2000558	mature B cell differentiation involved in immune response|transmembrane signaling receptor activity|extracellular space|integral component of plasma membrane|cell surface receptor signaling pathway|regulation of immune response|positive regulation of immunoglobulin production in mucosal tissue
LOC688320	0.498067996	0	0.996135993	Inf	Inf	1	1	0	0.017357948	688320		GO:0004090,GO:0005997,GO:0006006,GO:0042802,GO:0043621,GO:0050038	carbonyl reductase (NADPH) activity|xylulose metabolic process|glucose metabolic process|identical protein binding|protein self-association|L-xylulose reductase (NADP+) activity	rno00590,rno00980	Arachidonic acid metabolism|Metabolism of xenobiotics by cytochrome P450
LOC689065	1.494203989	0	2.988407978	Inf	Inf	0.372732404	1	0	0.132375833	689065	hypothetical protein LOC689065
LOC689599	0.996135993	0	1.992271985	Inf	Inf	0.573868536	1	0	0.04584641	689599		GO:0005634,GO:0005737,GO:0050852	nucleus|cytoplasm|T cell receptor signaling pathway
LOC689899	1.494203989	0	2.988407978	Inf	Inf	0.372732404	1	0	0.297110204	689899		GO:0000027,GO:0003735,GO:0006412,GO:0019843,GO:0022625	ribosomal large subunit assembly|structural constituent of ribosome|translation|rRNA binding|cytosolic large ribosomal subunit
LOC690096	0.498067996	0	0.996135993	Inf	Inf	1	1	0	0.016455334	690096
LOC690142	1.494203989	0	2.988407978	Inf	Inf	0.372732404	1	0	0.058172411	690142
LOC690246	0.996135993	0	1.992271985	Inf	Inf	0.573868536	1	0	0.139816567	690246				rno03010,rno05171	Ribosome|Coronavirus disease - COVID-19
LOC690299	0.498067996	0	0.996135993	Inf	Inf	1	1	0	0.039179368	690299
LOC690386	0.498067996	0	0.996135993	Inf	Inf	1	1	0	0.100149507	690386	hypothetical protein LOC690386	GO:0045095	keratin filament
LOC690483	1.494203989	0	2.988407978	Inf	Inf	0.372732404	1	0	0.022105196	690483		GO:0016021	integral component of membrane
LOC691352	0.498067996	0	0.996135993	Inf	Inf	1	1	0	0.042783869	691352	similar to Robo-1
LOC691519	0.498067996	0	0.996135993	Inf	Inf	1	1	0	0.013303442	691519
Lad1	1.992271985	0	3.984543971	Inf	Inf	0.256541743	1	0	0.096796085	313325	ladinin 1	GO:0005198,GO:0005576,GO:0005604,GO:0015629	structural molecule activity|extracellular region|basement membrane|actin cytoskeleton
Lce1f	1.494203989	0	2.988407978	Inf	Inf	0.372732404	1	0	0.240538996	499663	late cornified envelope 1F	GO:0031424,GO:0042802	keratinization|identical protein binding
Lce1l	0.498067996	0	0.996135993	Inf	Inf	1	1	0	0.077845468	686125	late cornified envelope 1L	GO:0031424	keratinization
Leap2	0.498067996	0	0.996135993	Inf	Inf	1	1	0	0.232521029	497901	liver-expressed antimicrobial peptide 2
Lefty1	0.498067996	0	0.996135993	Inf	Inf	1	1	0	0.01994772	498299	left right determination factor 1	GO:0000122,GO:0003007,GO:0005125,GO:0005160,GO:0005576,GO:0005615,GO:0007368,GO:0008083,GO:0008285,GO:0009948,GO:0010862,GO:0030509,GO:0032526,GO:0038100,GO:0042074,GO:0060395,GO:1900108,GO:1900124	negative regulation of transcription by RNA polymerase II|heart morphogenesis|cytokine activity|transforming growth factor beta receptor binding|extracellular region|extracellular space|determination of left/right symmetry|growth factor activity|negative regulation of cell population proliferation|anterior/posterior axis specification|positive regulation of pathway-restricted SMAD protein phospho…	rno04350,rno04550	TGF-beta signaling pathway|Signaling pathways regulating pluripotency of stem cells
Lilrb1	0.498067996	0	0.996135993	Inf	Inf	1	1	0	0.019272013	100912456				rno04380,rno04662	Osteoclast differentiation|B cell receptor signaling pathway
Linc00514	0.996135993	0	1.992271985	Inf	Inf	0.573868536	1	0	0.045826767	360486
Lkaaear1	0.498067996	0	0.996135993	Inf	Inf	1	1	0	0.057941318	296483	LKAAEAR motif containing 1
Lmntd2	1.992271985	0	3.984543971	Inf	Inf	0.256541743	1	0	0.084720533	309108	lamin tail domain containing 2	GO:0048026	positive regulation of mRNA splicing, via spliceosome
Lpal2	0.498067996	0	0.996135993	Inf	Inf	1	1	0	0.070183513	690326	lipoprotein(a) like 2, pseudogene
Lrrc14b	0.996135993	0	1.992271985	Inf	Inf	0.573868536	1	0	0.041537737	502225	leucine rich repeat containing 14B	GO:0005737	cytoplasm
Lrrc26	0.498067996	0	0.996135993	Inf	Inf	1	1	0	0.04274967	311803	leucine rich repeat containing 26	GO:0005249,GO:0005737,GO:0005856,GO:0005887,GO:0008076,GO:0015459,GO:0044325,GO:0071805,GO:0099104,GO:1903818	voltage-gated potassium channel activity|cytoplasm|cytoskeleton|integral component of plasma membrane|voltage-gated potassium channel complex|potassium channel regulator activity|ion channel binding|potassium ion transmembrane transport|potassium channel activator activity|positive regulation of voltage-gated potassium channel activity
Lrrc3c	1.494203989	0	2.988407978	Inf	Inf	0.372732404	1	0	0.078186896	287668		GO:0005249,GO:0008076,GO:0044325,GO:0071805,GO:0099104	voltage-gated potassium channel activity|voltage-gated potassium channel complex|ion channel binding|potassium ion transmembrane transport|potassium channel activator activity
Ltb4r	0.498067996	0	0.996135993	Inf	Inf	1	1	0	0.030438154	59264	leukotriene B4 receptor	GO:0001632,GO:0004974,GO:0005515,GO:0005887,GO:0006954,GO:0007165,GO:0007218,GO:0008528,GO:0045121,GO:0061737	leukotriene B4 receptor activity|leukotriene receptor activity|protein binding|integral component of plasma membrane|inflammatory response|signal transduction|neuropeptide signaling pathway|G protein-coupled peptide receptor activity|membrane raft|leukotriene signaling pathway	rno04080	Neuroactive ligand-receptor interaction
Ly49i2	0.996135993	0	1.992271985	Inf	Inf	0.573868536	1	0	0.070553874	260324	Ly49 inhibitory receptor 2	GO:0009968,GO:0016021	negative regulation of signal transduction|integral component of membrane
Ly49si1	0.498067996	0	0.996135993	Inf	Inf	1	1	0	0.010925401	494206	immunoreceptor Ly49si1	GO:0016021	integral component of membrane
Ly49si3	0.996135993	0	1.992271985	Inf	Inf	0.573868536	1	0	0.13303442	494209	immunoreceptor Ly49si3	GO:0016021	integral component of membrane
Ly6g6d	0.498067996	0	0.996135993	Inf	Inf	1	1	0	0.13204898	415062	lymphocyte antigen 6 family member G6D	GO:0009897,GO:0030550,GO:0031225,GO:0032991,GO:0042802,GO:0045202,GO:0095500,GO:2000272	external side of plasma membrane|acetylcholine receptor inhibitor activity|anchored component of membrane|protein-containing complex|identical protein binding|synapse|acetylcholine receptor signaling pathway|negative regulation of signaling receptor activity
Lypd8	0.498067996	0	0.996135993	Inf	Inf	1	1	0	0.029160216	691259	LY6/PLAUR domain containing 8	GO:0005615,GO:0050829	extracellular space|defense response to Gram-negative bacterium
Magea8	0.498067996	0	0.996135993	Inf	Inf	1	1	0	0.029910423	302638
Mageb18	0.498067996	0	0.996135993	Inf	Inf	1	1	0	0.028132476	317270	MAGE family member B18	GO:0005737	cytoplasm
Mbl1	0.996135993	0	1.992271985	Inf	Inf	0.573868536	1	0	0.085362868	24548	mannose binding lectin 1	GO:0001867,GO:0002020,GO:0005509,GO:0005515,GO:0005537,GO:0005581,GO:0005615,GO:0006958,GO:0030247,GO:0042802,GO:0042803,GO:0048306,GO:0050766,GO:0050830,GO:0051873,GO:0062023,GO:0070207,GO:0070273,GO:0070492,GO:0120153	complement activation, lectin pathway|protease binding|calcium ion binding|protein binding|mannose binding|collagen trimer|extracellular space|complement activation, classical pathway|polysaccharide binding|identical protein binding|protein homodimerization activity|calcium-dependent protein binding|positive regulation of phagocytosis|defense response to Gram-positive bacterium|killing by host of…	rno04145,rno04610,rno05150,rno05171	Phagosome|Complement and coagulation cascades|Staphylococcus aureus infection|Coronavirus disease - COVID-19
Meikin	0.498067996	0	0.996135993	Inf	Inf	1	1	0	0.035724674	497904		GO:0000776,GO:0000779,GO:0007060,GO:0010789,GO:0016321,GO:0045143,GO:0051754	kinetochore|condensed chromosome, centromeric region|male meiosis chromosome segregation|meiotic sister chromatid cohesion involved in meiosis I|female meiosis chromosome segregation|homologous chromosome segregation|meiotic sister chromatid cohesion, centromeric
Meox1	0.498067996	0	0.996135993	Inf	Inf	1	1	0	0.028568289	363684	mesenchyme homeobox 1	GO:0000978,GO:0000981,GO:0001228,GO:0001757,GO:0003682,GO:0003700,GO:0005634,GO:0005737,GO:0006357,GO:0043565,GO:0045944,GO:0061053,GO:0061056,GO:0071837,GO:1990837	RNA polymerase II cis-regulatory region sequence-specific DNA binding|DNA-binding transcription factor activity, RNA polymerase II-specific|DNA-binding transcription activator activity, RNA polymerase II-specific|somite specification|chromatin binding|DNA-binding transcription factor activity|nucleus|cytoplasm|regulation of transcription by RNA polymerase II|sequence-specific DNA binding|positive…			Homeobox
Misp3	3.486475974	0	6.972951949	Inf	Inf	0.098917487	1	0	0.254492765	304650	MISP family member 3
Mixl1	0.498067996	0	0.996135993	Inf	Inf	1	1	0	0.022835114	289311	Mix paired-like homeobox 1	GO:0000785,GO:0000978,GO:0000981,GO:0000987,GO:0001228,GO:0001706,GO:0002244,GO:0005634,GO:0005654,GO:0006357,GO:0007369,GO:0007492,GO:0007507,GO:0030097,GO:0035987,GO:0042074,GO:0042802,GO:0042803,GO:0045944,GO:0048565,GO:0061629,GO:1901533,GO:1990837,GO:2000382	chromatin|RNA polymerase II cis-regulatory region sequence-specific DNA binding|DNA-binding transcription factor activity, RNA polymerase II-specific|cis-regulatory region sequence-specific DNA binding|DNA-binding transcription activator activity, RNA polymerase II-specific|endoderm formation|hematopoietic progenitor cell differentiation|nucleus|nucleoplasm|regulation of transcription by RNA poly…			Homeobox
Mlph	2.490339982	0	4.980679964	Inf	Inf	0.182708175	1	0	0.085349245	316620	melanophilin	GO:0001725,GO:0003779,GO:0005815,GO:0006605,GO:0015629,GO:0016461,GO:0017022,GO:0030318,GO:0030425,GO:0030674,GO:0030864,GO:0031267,GO:0031489,GO:0032400,GO:0042470,GO:0043473,GO:0048471,GO:0051010	stress fiber|actin binding|microtubule organizing center|protein targeting|actin cytoskeleton|unconventional myosin complex|myosin binding|melanocyte differentiation|dendrite|protein-macromolecule adaptor activity|cortical actin cytoskeleton|small GTPase binding|myosin V binding|melanosome localization|melanosome|pigmentation|perinuclear region of cytoplasm|microtubule plus-end binding
Mmp10	0.498067996	0	0.996135993	Inf	Inf	1	1	0	0.031219986	117061	matrix metallopeptidase 10	GO:0004222,GO:0005576,GO:0006508,GO:0008270,GO:0030198,GO:0030334,GO:0030574,GO:0031012	metalloendopeptidase activity|extracellular region|proteolysis|zinc ion binding|extracellular matrix organization|regulation of cell migration|collagen catabolic process|extracellular matrix
Mmp13	1.992271985	0	3.984543971	Inf	Inf	0.256541743	1	0	0.082213431	171052	matrix metallopeptidase 13	GO:0001503,GO:0001554,GO:0001649,GO:0001666,GO:0001958,GO:0001968,GO:0003417,GO:0004175,GO:0004222,GO:0005509,GO:0005518,GO:0005576,GO:0005615,GO:0005764,GO:0005794,GO:0006508,GO:0007507,GO:0007567,GO:0008233,GO:0008270,GO:0009612,GO:0009725,GO:0022617,GO:0030198,GO:0030282,GO:0030574,GO:0031012,GO:0035116,GO:0042493,GO:0043171,GO:0043627,GO:0044267,GO:0044849,GO:0046581,GO:0048306,GO:0050750,GO:…	ossification|luteolysis|osteoblast differentiation|response to hypoxia|endochondral ossification|fibronectin binding|growth plate cartilage development|endopeptidase activity|metalloendopeptidase activity|calcium ion binding|collagen binding|extracellular region|extracellular space|lysosome|Golgi apparatus|proteolysis|heart development|parturition|peptidase activity|zinc ion binding|response to m…	rno04657,rno04926,rno04928	IL-17 signaling pathway|Relaxin signaling pathway|Parathyroid hormone synthesis, secretion and action
Mogat3	0.498067996	0	0.996135993	Inf	Inf	1	1	0	0.100715323	685560		GO:0003846,GO:0004144,GO:0005789,GO:0006629,GO:0006640,GO:0008374,GO:0016021,GO:0019432,GO:1990578	2-acylglycerol O-acyltransferase activity|diacylglycerol O-acyltransferase activity|endoplasmic reticulum membrane|lipid metabolic process|monoacylglycerol biosynthetic process|O-acyltransferase activity|integral component of membrane|triglyceride biosynthetic process|perinuclear endoplasmic reticulum membrane	rno00561,rno04975	Glycerolipid metabolism|Fat digestion and absorption
Morc1	0.498067996	0	0.996135993	Inf	Inf	1	1	0	0.017615229	360712	MORC family CW-type zinc finger 1	GO:0001662,GO:0001673,GO:0005634,GO:0007283,GO:0008270,GO:0010529,GO:0010629,GO:0040029,GO:0043046,GO:0044026,GO:2000143	behavioral fear response|male germ cell nucleus|nucleus|spermatogenesis|zinc ion binding|negative regulation of transposition|negative regulation of gene expression|regulation of gene expression, epigenetic|DNA methylation involved in gamete generation|DNA hypermethylation|negative regulation of DNA-templated transcription, initiation
Mrap	0.996135993	0	1.992271985	Inf	Inf	0.573868536	1	0	0.074123128	288271	melanocortin 2 receptor accessory protein	GO:0005783,GO:0005789,GO:0005886,GO:0016021,GO:0030545,GO:0031780,GO:0031781,GO:0031782,GO:0031783,GO:0042802,GO:0043231,GO:0050873,GO:0070996,GO:0072659,GO:0106070,GO:0106071,GO:0106072,GO:1903077	endoplasmic reticulum|endoplasmic reticulum membrane|plasma membrane|integral component of membrane|signaling receptor regulator activity|corticotropin hormone receptor binding|type 3 melanocortin receptor binding|type 4 melanocortin receptor binding|type 5 melanocortin receptor binding|identical protein binding|intracellular membrane-bounded organelle|brown fat cell differentiation|type 1 melano…	rno04927,rno04934	Cortisol synthesis and secretion|Cushing syndrome
Mrln	0.498067996	0	0.996135993	Inf	Inf	1	1	0	0.085023588	100911740	myoregulin	GO:0004857,GO:0005789,GO:0009611,GO:0033017,GO:1901877,GO:1901895,GO:1902081	enzyme inhibitor activity|endoplasmic reticulum membrane|response to wounding|sarcoplasmic reticulum membrane|negative regulation of calcium ion binding|negative regulation of ATPase-coupled calcium transmembrane transporter activity|negative regulation of calcium ion import into sarcoplasmic reticulum
Mtnr1a	0.996135993	0	1.992271985	Inf	Inf	0.573868536	1	0	0.060292939	114211	melatonin receptor 1A	GO:0004930,GO:0005886,GO:0005887,GO:0007186,GO:0007193,GO:0007568,GO:0007623,GO:0008502,GO:0042562,GO:0043010,GO:0043025,GO:0043235,GO:0046676,GO:0097159	G protein-coupled receptor activity|plasma membrane|integral component of plasma membrane|G protein-coupled receptor signaling pathway|adenylate cyclase-inhibiting G protein-coupled receptor signaling pathway|aging|circadian rhythm|melatonin receptor activity|hormone binding|camera-type eye development|neuronal cell body|receptor complex|negative regulation of insulin secretion|organic cyclic com…	rno04080,rno04713	Neuroactive ligand-receptor interaction|Circadian entrainment
Myo3a	1.494203989	0	2.988407978	Inf	Inf	0.372732404	1	0	0.192604454	498806		GO:0000146,GO:0001917,GO:0004672,GO:0004674,GO:0005516,GO:0005524,GO:0005737,GO:0007601,GO:0007605,GO:0016459,GO:0018105,GO:0018107,GO:0030175,GO:0030832,GO:0031941,GO:0032426,GO:0032433,GO:0043531,GO:0046777,GO:0048839,GO:0051015,GO:0051491,GO:0060002,GO:0060088,GO:0090103	microfilament motor activity|photoreceptor inner segment|protein kinase activity|protein serine/threonine kinase activity|calmodulin binding|ATP binding|cytoplasm|visual perception|sensory perception of sound|myosin complex|peptidyl-serine phosphorylation|peptidyl-threonine phosphorylation|filopodium|regulation of actin filament length|filamentous actin|stereocilium tip|filopodium tip|ADP binding…
Nccrp1	0.498067996	0	0.996135993	Inf	Inf	1	1	0	0.039265666	292755	NCCRP1, F-box associated domain containing	GO:0005737,GO:0006516,GO:0008284,GO:0016567,GO:0019005,GO:0030433,GO:0031146,GO:0061630	cytoplasm|glycoprotein catabolic process|positive regulation of cell population proliferation|protein ubiquitination|SCF ubiquitin ligase complex|ubiquitin-dependent ERAD pathway|SCF-dependent proteasomal ubiquitin-dependent protein catabolic process|ubiquitin protein ligase activity
Nepn	0.996135993	0	1.992271985	Inf	Inf	0.573868536	1	0	0.048310602	309775	nephrocan	GO:0000122,GO:0005614,GO:0005615,GO:0030198,GO:0030512	negative regulation of transcription by RNA polymerase II|interstitial matrix|extracellular space|extracellular matrix organization|negative regulation of transforming growth factor beta receptor signaling pathway
Nfe2	2.490339982	0	4.980679964	Inf	Inf	0.182708175	1	0	0.089701169	366998	nuclear factor, erythroid 2	GO:0000978,GO:0000981,GO:0000987,GO:0003677,GO:0005634,GO:0005737,GO:0006357,GO:0007267,GO:0008285,GO:0010467,GO:0010468,GO:0016605,GO:0030502,GO:0032993,GO:0034242,GO:0042802,GO:0047485,GO:0050699,GO:0060716,GO:1990837,GO:2000758	RNA polymerase II cis-regulatory region sequence-specific DNA binding|DNA-binding transcription factor activity, RNA polymerase II-specific|cis-regulatory region sequence-specific DNA binding|DNA binding|nucleus|cytoplasm|regulation of transcription by RNA polymerase II|cell-cell signaling|negative regulation of cell population proliferation|gene expression|regulation of gene expression|PML body|…			TF_bZIP
Nkx2-4	0.498067996	0	0.996135993	Inf	Inf	1	1	0	0.021642993	366213						Homeobox
Nmu	2.988407978	0	5.976815956	Inf	Inf	0.133236696	1	0	0.367980528	63887	neuromedin U	GO:0001659,GO:0001696,GO:0003084,GO:0005576,GO:0007204,GO:0007218,GO:0009648,GO:0010460,GO:0019233,GO:0031652,GO:0031839,GO:0031840,GO:0042755,GO:0042922,GO:0043195,GO:0045187,GO:0045987,GO:0046887,GO:0050806,GO:0060259,GO:0060455,GO:0097009,GO:0120061,GO:0120069,GO:1902722,GO:1903999,GO:1904058,GO:2000252,GO:2000821	temperature homeostasis|gastric acid secretion|positive regulation of systemic arterial blood pressure|extracellular region|positive regulation of cytosolic calcium ion concentration|neuropeptide signaling pathway|photoperiodism|positive regulation of heart rate|sensory perception of pain|positive regulation of heat generation|type 1 neuromedin U receptor binding|type 2 neuromedin U receptor bind…	rno04080	Neuroactive ligand-receptor interaction
Nox3	0.498067996	0	0.996135993	Inf	Inf	1	1	0	0.031329723	292279	NADPH oxidase 3	GO:0001659,GO:0005737,GO:0005886,GO:0006952,GO:0009590,GO:0009629,GO:0016020,GO:0016175,GO:0016491,GO:0042554,GO:0043020,GO:0048840	temperature homeostasis|cytoplasm|plasma membrane|defense response|detection of gravity|response to gravity|membrane|superoxide-generating NAD(P)H oxidase activity|oxidoreductase activity|superoxide anion generation|NADPH oxidase complex|otolith development
Nr0b2	0.996135993	0	1.992271985	Inf	Inf	0.573868536	1	0	0.096273333	117274	nuclear receptor subfamily 0, group B, member 2	GO:0000122,GO:0000785,GO:0003714,GO:0005634,GO:0005737,GO:0007219,GO:0007623,GO:0008134,GO:0009749,GO:0010628,GO:0010629,GO:0014070,GO:0015721,GO:0019904,GO:0031100,GO:0032024,GO:0032922,GO:0032991,GO:0042803,GO:0042974,GO:0042975,GO:0043433,GO:0044877,GO:0045471,GO:0045892,GO:0045893,GO:0046965,GO:0046966,GO:0140416	negative regulation of transcription by RNA polymerase II|chromatin|transcription corepressor activity|nucleus|cytoplasm|Notch signaling pathway|circadian rhythm|transcription factor binding|response to glucose|positive regulation of gene expression|negative regulation of gene expression|response to organic cyclic compound|bile acid and bile salt transport|protein domain specific binding|animal o…	rno04976	Bile secretion	Miscellaneous
Ns5atp4	0.498067996	0	0.996135993	Inf	Inf	1	1	0	0.070740525	311934	NS5A (hepatitis C virus) transactivated protein 4
Nxpe1	3.486475974	0	6.972951949	Inf	Inf	0.098917487	1	0	0.096459381	500992	neurexophilin and PC-esterase domain family, member 1
Oas1f	0.498067996	0	0.996135993	Inf	Inf	1	1	0	0.036159457	494199	2 ' -5 ' oligoadenylate synthetase 1F	GO:0001730,GO:0003725,GO:0005737,GO:0016021,GO:0045087,GO:0051607	2'-5'-oligoadenylate synthetase activity|double-stranded RNA binding|cytoplasm|integral component of membrane|innate immune response|defense response to virus
Oas1k	0.498067996	0	0.996135993	Inf	Inf	1	1	0	0.026593653	494198	2 ' -5 ' oligoadenylate synthetase 1K	GO:0001730,GO:0003725,GO:0005737,GO:0016021,GO:0045087,GO:0051607	2'-5'-oligoadenylate synthetase activity|double-stranded RNA binding|cytoplasm|integral component of membrane|innate immune response|defense response to virus
Odf4	1.494203989	0	2.988407978	Inf	Inf	0.372732404	1	0	0.100337405	303236	outer dense fiber of sperm tails 4	GO:0001520,GO:0005886,GO:0007275,GO:0007283,GO:0016021,GO:0030154,GO:0031514	outer dense fiber|plasma membrane|multicellular organism development|spermatogenesis|integral component of membrane|cell differentiation|motile cilium
Ofcc1	0.498067996	0	0.996135993	Inf	Inf	1	1	0	0.017113548	690971		GO:0005737,GO:0005783,GO:0005829,GO:0015630,GO:0016021,GO:0048471	cytoplasm|endoplasmic reticulum|cytosol|microtubule cytoskeleton|integral component of membrane|perinuclear region of cytoplasm
Olr1070	0.498067996	0	0.996135993	Inf	Inf	1	1	0	0.055708163	366816	olfactory receptor 1070	GO:0004930,GO:0004984,GO:0005549,GO:0005886,GO:0007186,GO:0016021,GO:0050911	G protein-coupled receptor activity|olfactory receptor activity|odorant binding|plasma membrane|G protein-coupled receptor signaling pathway|integral component of membrane|detection of chemical stimulus involved in sensory perception of smell	rno04740	Olfactory transduction
Olr1400	0.498067996	0	0.996135993	Inf	Inf	1	1	0	0.057136578	405991	olfactory receptor 1400	GO:0004930,GO:0004984,GO:0005886,GO:0007186,GO:0016021,GO:0050911	G protein-coupled receptor activity|olfactory receptor activity|plasma membrane|G protein-coupled receptor signaling pathway|integral component of membrane|detection of chemical stimulus involved in sensory perception of smell	rno04740	Olfactory transduction
Olr1529	0.498067996	0	0.996135993	Inf	Inf	1	1	0	0.058067141	405996	olfactory receptor 1529	GO:0004930,GO:0004984,GO:0005549,GO:0005886,GO:0007186,GO:0016021,GO:0050911	G protein-coupled receptor activity|olfactory receptor activity|odorant binding|plasma membrane|G protein-coupled receptor signaling pathway|integral component of membrane|detection of chemical stimulus involved in sensory perception of smell	rno04740	Olfactory transduction
Olr1615	0.498067996	0	0.996135993	Inf	Inf	1	1	0	0.05353337	405371	olfactory receptor 1615	GO:0004930,GO:0004984,GO:0005886,GO:0007186,GO:0016021,GO:0050911	G protein-coupled receptor activity|olfactory receptor activity|plasma membrane|G protein-coupled receptor signaling pathway|integral component of membrane|detection of chemical stimulus involved in sensory perception of smell	rno04740	Olfactory transduction
Olr202	0.498067996	0	0.996135993	Inf	Inf	1	1	0	0.05519075	365337	olfactory receptor 202	GO:0004930,GO:0004984,GO:0005886,GO:0007186,GO:0016021,GO:0050911	G protein-coupled receptor activity|olfactory receptor activity|plasma membrane|G protein-coupled receptor signaling pathway|integral component of membrane|detection of chemical stimulus involved in sensory perception of smell	rno04740	Olfactory transduction
Olr36	0.996135993	0	1.992271985	Inf	Inf	0.573868536	1	0	0.109031268	405257	olfactory receptor 36	GO:0004930,GO:0004984,GO:0005886,GO:0007186,GO:0016021,GO:0050911	G protein-coupled receptor activity|olfactory receptor activity|plasma membrane|G protein-coupled receptor signaling pathway|integral component of membrane|detection of chemical stimulus involved in sensory perception of smell	rno04740	Olfactory transduction
Olr875	0.498067996	0	0.996135993	Inf	Inf	1	1	0	0.056954033	288789	olfactory receptor 875	GO:0004930,GO:0004984,GO:0005549,GO:0005886,GO:0007186,GO:0016021,GO:0050911	G protein-coupled receptor activity|olfactory receptor activity|odorant binding|plasma membrane|G protein-coupled receptor signaling pathway|integral component of membrane|detection of chemical stimulus involved in sensory perception of smell	rno04740	Olfactory transduction
Ostn	1.494203989	0	2.988407978	Inf	Inf	0.372732404	1	0	0.103110225	360730	osteocrin	GO:0001503,GO:0003416,GO:0005102,GO:0005179,GO:0005615,GO:0007166,GO:0007275,GO:0009755,GO:0030154,GO:0045668,GO:0046325,GO:1903860	ossification|endochondral bone growth|signaling receptor binding|hormone activity|extracellular space|cell surface receptor signaling pathway|multicellular organism development|hormone-mediated signaling pathway|cell differentiation|negative regulation of osteoblast differentiation|negative regulation of glucose import|negative regulation of dendrite extension
Otop1	0.498067996	0	0.996135993	Inf	Inf	1	1	0	0.029271941	305427	otopetrin 1	GO:0005887,GO:0009590,GO:0015252,GO:0016020,GO:0031214,GO:0032869,GO:0042472,GO:0060336,GO:1902600	integral component of plasma membrane|detection of gravity|proton channel activity|membrane|biomineral tissue development|cellular response to insulin stimulus|inner ear morphogenesis|negative regulation of interferon-gamma-mediated signaling pathway|proton transmembrane transport
Otos	0.498067996	0	0.996135993	Inf	Inf	1	1	0	0.060429194	246044	otospiralin	GO:0005576,GO:0007605	extracellular region|sensory perception of sound
Pax5	0.498067996	0	0.996135993	Inf	Inf	1	1	0	0.009778723	500453	paired box 5	GO:0000122,GO:0000978,GO:0000981,GO:0001228,GO:0001650,GO:0003677,GO:0003700,GO:0005634,GO:0005654,GO:0005829,GO:0006355,GO:0006357,GO:0007568,GO:0021670,GO:0021987,GO:0030534,GO:0035914,GO:0043231,GO:0045944,GO:0048701,GO:0048856,GO:0051573	negative regulation of transcription by RNA polymerase II|RNA polymerase II cis-regulatory region sequence-specific DNA binding|DNA-binding transcription factor activity, RNA polymerase II-specific|DNA-binding transcription activator activity, RNA polymerase II-specific|fibrillar center|DNA binding|DNA-binding transcription factor activity|nucleus|nucleoplasm|cytosol|regulation of transcription, …	rno05202	Transcriptional misregulation in cancer	PAX
Pcsk9	1.494203989	0	2.988407978	Inf	Inf	0.372732404	1	0	0.048136667	298296	proprotein convertase subtilisin/kexin type 9	GO:0001822,GO:0001889,GO:0001920,GO:0002092,GO:0004252,GO:0005576,GO:0005615,GO:0005737,GO:0005764,GO:0005769,GO:0005770,GO:0005783,GO:0005791,GO:0005794,GO:0005886,GO:0006641,GO:0006644,GO:0006915,GO:0007041,GO:0008203,GO:0009267,GO:0009986,GO:0010469,GO:0010989,GO:0016485,GO:0016540,GO:0019871,GO:0022008,GO:0030134,GO:0030169,GO:0030182,GO:0030547,GO:0032799,GO:0032802,GO:0032803,GO:0032805,GO:…	kidney development|liver development|negative regulation of receptor recycling|positive regulation of receptor internalization|serine-type endopeptidase activity|extracellular region|extracellular space|cytoplasm|lysosome|early endosome|late endosome|endoplasmic reticulum|rough endoplasmic reticulum|Golgi apparatus|plasma membrane|triglyceride metabolic process|phospholipid metabolic process|apop…	rno04979	Cholesterol metabolism
Pde4c	0.996135993	0	1.992271985	Inf	Inf	0.573868536	1	0	0.010290521	290646	phosphodiesterase 4C	GO:0004114,GO:0004115,GO:0005634,GO:0005829,GO:0005929,GO:0006198,GO:0007165,GO:0046872,GO:0048471,GO:0061179	3',5'-cyclic-nucleotide phosphodiesterase activity|3',5'-cyclic-AMP phosphodiesterase activity|nucleus|cytosol|cilium|cAMP catabolic process|signal transduction|metal ion binding|perinuclear region of cytoplasm|negative regulation of insulin secretion involved in cellular response to glucose stimulus	rno00230,rno04024,rno04928,rno05032	Purine metabolism|cAMP signaling pathway|Parathyroid hormone synthesis, secretion and action|Morphine addiction
Pitx2	0.498067996	0	0.996135993	Inf	Inf	1	1	0	0.023528305	54284	paired-like homeodomain 2	GO:0000122,GO:0000976,GO:0000978,GO:0000981,GO:0001227,GO:0001228,GO:0001569,GO:0001570,GO:0001701,GO:0001764,GO:0002074,GO:0003171,GO:0003253,GO:0003350,GO:0003677,GO:0003682,GO:0003700,GO:0005634,GO:0005654,GO:0005667,GO:0005737,GO:0006355,GO:0006357,GO:0007368,GO:0007420,GO:0007507,GO:0007519,GO:0007520,GO:0008584,GO:0008585,GO:0009653,GO:0009725,GO:0009887,GO:0016055,GO:0021763,GO:0021855,GO:…	negative regulation of transcription by RNA polymerase II|transcription cis-regulatory region binding|RNA polymerase II cis-regulatory region sequence-specific DNA binding|DNA-binding transcription factor activity, RNA polymerase II-specific|DNA-binding transcription repressor activity, RNA polymerase II-specific|DNA-binding transcription activator activity, RNA polymerase II-specific|branching i…	rno04350	TGF-beta signaling pathway	Homeobox
Pitx3	0.996135993	0	1.992271985	Inf	Inf	0.573868536	1	0	0.070600445	29609	paired-like homeodomain 3	GO:0000785,GO:0000978,GO:0000981,GO:0001228,GO:0002088,GO:0002089,GO:0003700,GO:0005634,GO:0005737,GO:0006355,GO:0006357,GO:0007568,GO:0007626,GO:0009653,GO:0010468,GO:0014014,GO:0030901,GO:0035902,GO:0042220,GO:0043278,GO:0043525,GO:0045893,GO:0045944,GO:0048666,GO:0050768,GO:0070306,GO:0071542,GO:1904313,GO:1904935,GO:1990792,GO:1990837	chromatin|RNA polymerase II cis-regulatory region sequence-specific DNA binding|DNA-binding transcription factor activity, RNA polymerase II-specific|DNA-binding transcription activator activity, RNA polymerase II-specific|lens development in camera-type eye|lens morphogenesis in camera-type eye|DNA-binding transcription factor activity|nucleus|cytoplasm|regulation of transcription, DNA-templated…			Homeobox
Pkdrej	0.498067996	0	0.996135993	Inf	Inf	1	1	0	0.008388994	300124	polycystin family receptor for egg jelly	GO:0005262,GO:0005509,GO:0005886,GO:0016020,GO:0016021,GO:0050982,GO:0060046,GO:0070588	calcium channel activity|calcium ion binding|plasma membrane|membrane|integral component of membrane|detection of mechanical stimulus|regulation of acrosome reaction|calcium ion transmembrane transport
Pkp3	0.498067996	0	0.996135993	Inf	Inf	1	1	0	0.017234881	293619	plakophilin 3	GO:0002159,GO:0003723,GO:0005634,GO:0005654,GO:0005737,GO:0005886,GO:0005912,GO:0006417,GO:0007043,GO:0010628,GO:0019899,GO:0030054,GO:0030057,GO:0045182,GO:0045294,GO:0045296,GO:0050839,GO:0072659,GO:0098609,GO:1902373,GO:1990124	desmosome assembly|RNA binding|nucleus|nucleoplasm|cytoplasm|plasma membrane|adherens junction|regulation of translation|cell-cell junction assembly|positive regulation of gene expression|enzyme binding|cell junction|desmosome|translation regulator activity|alpha-catenin binding|cadherin binding|cell adhesion molecule binding|protein localization to plasma membrane|cell-cell adhesion|negative reg…
Pla2g3	0.498067996	0	0.996135993	Inf	Inf	1	1	0	0.017064402	289733	phospholipase A2, group III	GO:0001675,GO:0002532,GO:0004620,GO:0005576,GO:0005814,GO:0006644,GO:0006658,GO:0007288,GO:0010629,GO:0010744,GO:0010976,GO:0019372,GO:0031394,GO:0032308,GO:0034374,GO:0034375,GO:0042116,GO:0043303,GO:0043524,GO:0046337,GO:0046470,GO:0046471,GO:0046473,GO:0046488,GO:0047498,GO:0048468,GO:0048469,GO:0050482,GO:0055037,GO:0060271,GO:0060376,GO:1900017,GO:1900222,GO:1903595,GO:2001135	acrosome assembly|production of molecular mediator involved in inflammatory response|phospholipase activity|extracellular region|centriole|phospholipid metabolic process|phosphatidylserine metabolic process|sperm axoneme assembly|negative regulation of gene expression|positive regulation of macrophage derived foam cell differentiation|positive regulation of neuron projection development|lipoxygen…	rno00564,rno00565,rno00590,rno00591,rno00592,rno04014,rno04270,rno04972,rno04975	Glycerophospholipid metabolism|Ether lipid metabolism|Arachidonic acid metabolism|Linoleic acid metabolism|alpha-Linolenic acid metabolism|Ras signaling pathway|Vascular smooth muscle contraction|Pancreatic secretion|Fat digestion and absorption
Plekhs1	3.486475974	0	6.972951949	Inf	Inf	0.098917487	1	0	0.148084991	499377	pleckstrin homology domain containing S1
Pmch	0.498067996	0	0.996135993	Inf	Inf	1	1	0	0.071785016	24659	pro-melanin-concentrating hormone	GO:0002027,GO:0005615,GO:0005634,GO:0007165,GO:0007204,GO:0007218,GO:0007268,GO:0007595,GO:0007610,GO:0007611,GO:0007631,GO:0009409,GO:0030354,GO:0031777,GO:0032227,GO:0042593,GO:0042756,GO:0045202,GO:0045776,GO:0046005,GO:0048168	regulation of heart rate|extracellular space|nucleus|signal transduction|positive regulation of cytosolic calcium ion concentration|neuropeptide signaling pathway|chemical synaptic transmission|lactation|behavior|learning or memory|feeding behavior|response to cold|melanin-concentrating hormone activity|type 1 melanin-concentrating hormone receptor binding|negative regulation of synaptic transmis…	rno04080	Neuroactive ligand-receptor interaction
Pnmt	0.498067996	0	0.996135993	Inf	Inf	1	1	0	0.01741447	24661	phenylethanolamine-N-methyltransferase	GO:0001666,GO:0004603,GO:0005737,GO:0005829,GO:0008168,GO:0008170,GO:0008757,GO:0009409,GO:0009414,GO:0014823,GO:0016740,GO:0030325,GO:0030424,GO:0030425,GO:0031960,GO:0032259,GO:0032868,GO:0035176,GO:0035900,GO:0035902,GO:0042415,GO:0042418,GO:0043025,GO:0043195,GO:0043196,GO:0043204,GO:0043434,GO:0045471,GO:0045472,GO:0046498,GO:0046500,GO:0050909,GO:0071363,GO:0071375,GO:0071549	response to hypoxia|phenylethanolamine N-methyltransferase activity|cytoplasm|cytosol|methyltransferase activity|N-methyltransferase activity|S-adenosylmethionine-dependent methyltransferase activity|response to cold|response to water deprivation|response to activity|transferase activity|adrenal gland development|axon|dendrite|response to corticosteroid|methylation|response to insulin|social beha…	rno00350	Tyrosine metabolism
Pom121l2	0.498067996	0	0.996135993	Inf	Inf	1	1	0	0.011029044	502128	POM121 transmembrane nucleoporin-like 2	GO:0005643,GO:0006405,GO:0006606,GO:0008139,GO:0017056	nuclear pore|RNA export from nucleus|protein import into nucleus|nuclear localization sequence binding|structural constituent of nuclear pore	rno03013,rno05014	RNA transport|Amyotrophic lateral sclerosis
Pon1	3.486475974	0	6.972951949	Inf	Inf	0.098917487	1	0	0.241677764	84024	paraoxonase 1	GO:0004063,GO:0004064,GO:0005509,GO:0005543,GO:0005615,GO:0006629,GO:0008203,GO:0009636,GO:0010875,GO:0016311,GO:0019439,GO:0031667,GO:0032411,GO:0034364,GO:0034366,GO:0034445,GO:0042803,GO:0043231,GO:0046395,GO:0046434,GO:0046470,GO:0051099,GO:0070542,GO:0102007,GO:1902617	aryldialkylphosphatase activity|arylesterase activity|calcium ion binding|phospholipid binding|extracellular space|lipid metabolic process|cholesterol metabolic process|response to toxic substance|positive regulation of cholesterol efflux|dephosphorylation|aromatic compound catabolic process|response to nutrient levels|positive regulation of transporter activity|high-density lipoprotein particle|…
Ppp1r27	0.996135993	0	1.992271985	Inf	Inf	0.573868536	1	0	0.135563591	287881	protein phosphatase 1, regulatory subunit 27	GO:0010923,GO:0019902	negative regulation of phosphatase activity|phosphatase binding
Prdm12	0.996135993	0	1.992271985	Inf	Inf	0.573868536	1	0	0.069095396	688699		GO:0000122,GO:0003677,GO:0005634,GO:0005654,GO:0008168,GO:0010468,GO:0019233,GO:0022008,GO:0031175,GO:0032259,GO:0046872,GO:0050965,GO:0051574,GO:1900111,GO:1990226	negative regulation of transcription by RNA polymerase II|DNA binding|nucleus|nucleoplasm|methyltransferase activity|regulation of gene expression|sensory perception of pain|neurogenesis|neuron projection development|methylation|metal ion binding|detection of temperature stimulus involved in sensory perception of pain|positive regulation of histone H3-K9 methylation|positive regulation of histone…			zf-C2H2
Prkag3	1.494203989	0	2.988407978	Inf	Inf	0.372732404	1	0	0.054367845	301518	protein kinase AMP-activated non-catalytic subunit gamma 3	GO:0004679,GO:0005634,GO:0005737,GO:0005978,GO:0006096,GO:0006468,GO:0014873,GO:0016208,GO:0019887,GO:0019901,GO:0031588,GO:0042149,GO:0050790,GO:0071900	AMP-activated protein kinase activity|nucleus|cytoplasm|glycogen biosynthetic process|glycolytic process|protein phosphorylation|response to muscle activity involved in regulation of muscle adaptation|AMP binding|protein kinase regulator activity|protein kinase binding|nucleotide-activated protein kinase complex|cellular response to glucose starvation|regulation of catalytic activity|regulation o…	rno04068,rno04152,rno04211,rno04213,rno04371,rno04530,rno04710,rno04714,rno04910,rno04920,rno04921,rno04922,rno04931,rno04932,rno05410	FoxO signaling pathway|AMPK signaling pathway|Longevity regulating pathway|Longevity regulating pathway - multiple species|Apelin signaling pathway|Tight junction|Circadian rhythm|Thermogenesis|Insulin signaling pathway|Adipocytokine signaling pathway|Oxytocin signaling pathway|Glucagon signaling pathway|Insulin resistance|Non-alcoholic fatty liver disease|Hypertrophic cardiomyopathy
Prl6a1	3.486475974	0	6.972951949	Inf	Inf	0.098917487	1	0	0.324964286	24657	prolactin family 6, subfamily a, member 1	GO:0005148,GO:0005179,GO:0005576,GO:0005615,GO:0007165,GO:0007565,GO:0008284,GO:0030879,GO:0031667,GO:0046427,GO:1903489	prolactin receptor binding|hormone activity|extracellular region|extracellular space|signal transduction|female pregnancy|positive regulation of cell population proliferation|mammary gland development|response to nutrient levels|positive regulation of receptor signaling pathway via JAK-STAT|positive regulation of lactation	rno04060,rno04080,rno04151,rno04630,rno04917	Cytokine-cytokine receptor interaction|Neuroactive ligand-receptor interaction|PI3K-Akt signaling pathway|JAK-STAT signaling pathway|Prolactin signaling pathway
Prl7a3	0.498067996	0	0.996135993	Inf	Inf	1	1	0	0.05054805	64361	prolactin family 7, subfamily a, member 3	GO:0005148,GO:0005179,GO:0005576,GO:0005615,GO:0007165,GO:0007565,GO:0008284,GO:0030879,GO:0031667,GO:0046427,GO:1903489	prolactin receptor binding|hormone activity|extracellular region|extracellular space|signal transduction|female pregnancy|positive regulation of cell population proliferation|mammary gland development|response to nutrient levels|positive regulation of receptor signaling pathway via JAK-STAT|positive regulation of lactation
Prl8a4	0.498067996	0	0.996135993	Inf	Inf	1	1	0	0.06874015	59088	prolactin family 8, subfamily a, member 4	GO:0005148,GO:0005179,GO:0005576,GO:0005615,GO:0007165,GO:0007565,GO:0008284,GO:0030879,GO:0031667,GO:0046427,GO:1903489	prolactin receptor binding|hormone activity|extracellular region|extracellular space|signal transduction|female pregnancy|positive regulation of cell population proliferation|mammary gland development|response to nutrient levels|positive regulation of receptor signaling pathway via JAK-STAT|positive regulation of lactation
Prlh	0.498067996	0	0.996135993	Inf	Inf	1	1	0	0.014058842	63850	prolactin releasing hormone	GO:0001894,GO:0002021,GO:0005148,GO:0005179,GO:0005184,GO:0005576,GO:0006112,GO:0006629,GO:0007186,GO:0007631,GO:0009749,GO:0031861,GO:0032868,GO:0040014,GO:0042755,GO:0043434,GO:0045444,GO:0048483	tissue homeostasis|response to dietary excess|prolactin receptor binding|hormone activity|neuropeptide hormone activity|extracellular region|energy reserve metabolic process|lipid metabolic process|G protein-coupled receptor signaling pathway|feeding behavior|response to glucose|prolactin-releasing peptide receptor binding|response to insulin|regulation of multicellular organism growth|eating beh…	rno04080	Neuroactive ligand-receptor interaction
Prokr1	4.980679964	0	9.961359927	Inf	Inf	0.043724649	0.89255998	0	0.170317951	192648	prokineticin receptor 1	GO:0004930,GO:0004983,GO:0005887,GO:0007186,GO:0007218,GO:0043066	G protein-coupled receptor activity|neuropeptide Y receptor activity|integral component of plasma membrane|G protein-coupled receptor signaling pathway|neuropeptide signaling pathway|negative regulation of apoptotic process
Prom2	1.494203989	0	2.988407978	Inf	Inf	0.372732404	1	0	0.037442126	192211	prominin 2	GO:0001934,GO:0004888,GO:0005635,GO:0005886,GO:0005887,GO:0005902,GO:0005929,GO:0007165,GO:0008083,GO:0009986,GO:0015485,GO:0016021,GO:0016323,GO:0016324,GO:0031346,GO:0031410,GO:0031528,GO:0042995,GO:0043087,GO:0044393,GO:0045121,GO:0048550,GO:0060170,GO:0071914,GO:2000369,GO:2001287	positive regulation of protein phosphorylation|transmembrane signaling receptor activity|nuclear envelope|plasma membrane|integral component of plasma membrane|microvillus|cilium|signal transduction|growth factor activity|cell surface|cholesterol binding|integral component of membrane|basolateral plasma membrane|apical plasma membrane|positive regulation of cell projection organization|cytoplasmi…
Prps1l1	0.498067996	0	0.996135993	Inf	Inf	1	1	0	0.03162616	298954	phosphoribosyl pyrophosphate synthetase 1-like 1	GO:0000287,GO:0002189,GO:0004749,GO:0005524,GO:0005737,GO:0006015,GO:0006164,GO:0008584,GO:0009116,GO:0009156,GO:0016301,GO:0016310	magnesium ion binding|ribose phosphate diphosphokinase complex|ribose phosphate diphosphokinase activity|ATP binding|cytoplasm|5-phosphoribose 1-diphosphate biosynthetic process|purine nucleotide biosynthetic process|male gonad development|nucleoside metabolic process|ribonucleoside monophosphate biosynthetic process|kinase activity|phosphorylation	rno00030,rno00230	Pentose phosphate pathway|Purine metabolism
Prr15l	0.996135993	0	1.992271985	Inf	Inf	0.573868536	1	0	0.053002811	688163
Ptgdrl	1.494203989	0	2.988407978	Inf	Inf	0.372732404	1	0	0.149385019	498475	prostaglandin D2 receptor-like	GO:0004956,GO:0005886,GO:0006954,GO:0007186,GO:0007204,GO:0016021,GO:0043303	prostaglandin D receptor activity|plasma membrane|inflammatory response|G protein-coupled receptor signaling pathway|positive regulation of cytosolic calcium ion concentration|integral component of membrane|mast cell degranulation	rno04080	Neuroactive ligand-receptor interaction
Qrfpr	1.992271985	0	3.984543971	Inf	Inf	0.256541743	1	0	0.164300574	310327	pyroglutamylated RFamide peptide receptor	GO:0004930,GO:0004983,GO:0005887,GO:0007186,GO:0007218,GO:0097730	G protein-coupled receptor activity|neuropeptide Y receptor activity|integral component of plasma membrane|G protein-coupled receptor signaling pathway|neuropeptide signaling pathway|non-motile cilium
RGD1306782	0.996135993	0	1.992271985	Inf	Inf	0.573868536	1	0	0.081524141	300091		GO:0005743,GO:0005747,GO:0016021	mitochondrial inner membrane|mitochondrial respiratory chain complex I|integral component of membrane
RGD1359334	0.498067996	0	0.996135993	Inf	Inf	1	1	0	0.043408958	295265	similar to hypothetical protein FLJ20519	GO:0005576,GO:0042127	extracellular region|regulation of cell population proliferation
RGD1559459	2.988407978	0	5.976815956	Inf	Inf	0.133236696	1	0	0.100937094	501907		GO:0005640,GO:0005783,GO:0008194,GO:0008202,GO:0015020,GO:0016021,GO:0043231,GO:0052697	nuclear outer membrane|endoplasmic reticulum|UDP-glycosyltransferase activity|steroid metabolic process|glucuronosyltransferase activity|integral component of membrane|intracellular membrane-bounded organelle|xenobiotic glucuronidation	rno00040,rno00053,rno00140,rno00830,rno00860,rno00980,rno00982,rno00983,rno04976,rno05204	Pentose and glucuronate interconversions|Ascorbate and aldarate metabolism|Steroid hormone biosynthesis|Retinol metabolism|Porphyrin and chlorophyll metabolism|Metabolism of xenobiotics by cytochrome P450|Drug metabolism - cytochrome P450|Drug metabolism - other enzymes|Bile secretion|Chemical carcinogenesis
RGD1559482	0.996135993	0	1.992271985	Inf	Inf	0.573868536	1	0	0.121269471	498022	similar to immunoglobulin superfamily, member 7	GO:0004888,GO:0005886,GO:0016021	transmembrane signaling receptor activity|plasma membrane|integral component of membrane
RGD1560568	0.498067996	0	0.996135993	Inf	Inf	1	1	0	0.066849796	500914
RGD1560703	1.494203989	0	2.988407978	Inf	Inf	0.372732404	1	0	0.326096565	502535
RGD1561442	0.498067996	0	0.996135993	Inf	Inf	1	1	0	0.01091648	311416
RGD1561558	0.498067996	0	0.996135993	Inf	Inf	1	1	0	0.038669441	317314		GO:0005634,GO:0006357,GO:0008301	nucleus|regulation of transcription by RNA polymerase II|DNA binding, bending
RGD1561648	3.984543971	0	7.969087942	Inf	Inf	0.074500754	1	0	0.159166181	500841	RGD1561648
RGD1561886	0.498067996	0	0.996135993	Inf	Inf	1	1	0	0.092365867	363918
RGD1561919	0.498067996	0	0.996135993	Inf	Inf	1	1	0	0.106533539	307665		GO:0003723,GO:0003735,GO:0006412	RNA binding|structural constituent of ribosome|translation
RGD1562462	0.498067996	0	0.996135993	Inf	Inf	1	1	0	0.057258926	289245	similar to Ifi204 protein
RGD1562625	0.498067996	0	0.996135993	Inf	Inf	1	1	0	0.013208159	502291
RGD1563581	0.498067996	0	0.996135993	Inf	Inf	1	1	0	0.120995106	502110		GO:0042127	regulation of cell population proliferation
RGD1563667	1.992271985	0	3.984543971	Inf	Inf	0.256541743	1	0	0.112648419	365855	similar to TDPOZ3	GO:0005634,GO:0005737,GO:0030162,GO:0031625,GO:0043161	nucleus|cytoplasm|regulation of proteolysis|ubiquitin protein ligase binding|proteasome-mediated ubiquitin-dependent protein catabolic process
RGD1564698	0.498067996	0	0.996135993	Inf	Inf	1	1	0	0.020350014	497882
RGD1564712	0.498067996	0	0.996135993	Inf	Inf	1	1	0	0.090337562	302244	RGD1564712
RGD1564748	0.498067996	0	0.996135993	Inf	Inf	1	1	0	0.006121076	302311
RGD1564854	0.498067996	0	0.996135993	Inf	Inf	1	1	0	0.012311196	502617	similar to divalent cation tolerant protein CUTA	GO:0005507,GO:0010038,GO:0016021	copper ion binding|response to metal ion|integral component of membrane
RGD1564956	2.988407978	0	5.976815956	Inf	Inf	0.133236696	1	0	0.326760713	500462
RGD1565058	1.992271985	0	3.984543971	Inf	Inf	0.256541743	1	0	0.366928554	501587
RGD1565725	0.498067996	0	0.996135993	Inf	Inf	1	1	0	0.020474669	289926	similar to hypothetical protein FLJ23834
RT1-Ha	0.996135993	0	1.992271985	Inf	Inf	0.573868536	1	0	0.065298946	24986	RT1 class II, locus Ha	GO:0002250,GO:0009986,GO:0016021,GO:0019886,GO:0032729,GO:0042102,GO:0042605,GO:0042613,GO:0043231,GO:0050870,GO:0071346	adaptive immune response|cell surface|integral component of membrane|antigen processing and presentation of exogenous peptide antigen via MHC class II|positive regulation of interferon-gamma production|positive regulation of T cell proliferation|peptide antigen binding|MHC class II protein complex|intracellular membrane-bounded organelle|positive regulation of T cell activation|cellular response …	rno04145,rno04514,rno04612,rno04640,rno04658,rno04659,rno04672,rno04940,rno05140,rno05145,rno05150,rno05152,rno05164,rno05166,rno05168,rno05169,rno05310,rno05320,rno05321,rno05322,rno05323,rno05330,rno05332,rno05416	Phagosome|Cell adhesion molecules|Antigen processing and presentation|Hematopoietic cell lineage|Th1 and Th2 cell differentiation|Th17 cell differentiation|Intestinal immune network for IgA production|Type I diabetes mellitus|Leishmaniasis|Toxoplasmosis|Staphylococcus aureus infection|Tuberculosis|Influenza A|Human T-cell leukemia virus 1 infection|Herpes simplex virus 1 infection|Epstein-Barr vi…
RT1-M4	0.498067996	0	0.996135993	Inf	Inf	1	1	0	0.052124597	309584	RT1 class Ib, locus M4	GO:0001916,GO:0002476,GO:0002486,GO:0005102,GO:0005615,GO:0006955,GO:0009897,GO:0016021,GO:0042605	positive regulation of T cell mediated cytotoxicity|antigen processing and presentation of endogenous peptide antigen via MHC class Ib|antigen processing and presentation of endogenous peptide antigen via MHC class I via ER pathway, TAP-independent|signaling receptor binding|extracellular space|immune response|external side of plasma membrane|integral component of membrane|peptide antigen binding	rno04144,rno04145,rno04218,rno04514,rno04612,rno04650,rno04940,rno05163,rno05165,rno05166,rno05167,rno05168,rno05169,rno05170,rno05203,rno05320,rno05330,rno05332,rno05416	Endocytosis|Phagosome|Cellular senescence|Cell adhesion molecules|Antigen processing and presentation|Natural killer cell mediated cytotoxicity|Type I diabetes mellitus|Human cytomegalovirus infection|Human papillomavirus infection|Human T-cell leukemia virus 1 infection|Kaposi sarcoma-associated herpesvirus infection|Herpes simplex virus 1 infection|Epstein-Barr virus infection|Human immunodefic…
Rcvrn	0.996135993	0	1.992271985	Inf	Inf	0.573868536	1	0	0.124083148	140936	recoverin	GO:0005509,GO:0007601,GO:0007602,GO:0030425,GO:0051924	calcium ion binding|visual perception|phototransduction|dendrite|regulation of calcium ion transport	rno04744	Phototransduction
Rd3l	0.996135993	0	1.992271985	Inf	Inf	0.573868536	1	0	0.085773595	314467	retinal degeneration 3-like
Rdh12	0.498067996	0	0.996135993	Inf	Inf	1	1	0	0.031947334	314264	retinol dehydrogenase 12	GO:0001917,GO:0004745,GO:0007601,GO:0042572,GO:0052650,GO:0110095	photoreceptor inner segment|NAD-retinol dehydrogenase activity|visual perception|retinol metabolic process|NADP-retinol dehydrogenase activity|cellular detoxification of aldehyde	rno00830	Retinol metabolism
Rdh7	0.498067996	0	0.996135993	Inf	Inf	1	1	0	0.046423469	360420	retinol dehydrogenase 7	GO:0004745,GO:0005783,GO:0042572	NAD-retinol dehydrogenase activity|endoplasmic reticulum|retinol metabolic process	rno00830	Retinol metabolism
Rep15	0.996135993	0	1.992271985	Inf	Inf	0.573868536	1	0	0.099590012	500366	RAB15 effector protein	GO:0001881,GO:0010008,GO:0033572,GO:0048471,GO:0055037	receptor recycling|endosome membrane|transferrin transport|perinuclear region of cytoplasm|recycling endosome
Rgsl1	3.486475974	0	6.972951949	Inf	Inf	0.098917487	1	0	0.088858024	690116
Ripply1	0.498067996	0	0.996135993	Inf	Inf	1	1	0	0.024464701	680702		GO:0000122,GO:0005634,GO:0007219,GO:0009880,GO:0010468,GO:0032525,GO:0060349	negative regulation of transcription by RNA polymerase II|nucleus|Notch signaling pathway|embryonic pattern specification|regulation of gene expression|somite rostral/caudal axis specification|bone morphogenesis
Rnase6	1.494203989	0	2.988407978	Inf	Inf	0.372732404	1	0	0.109890075	305842	ribonuclease A family member k6	GO:0003676,GO:0004540,GO:0005615,GO:0019731,GO:0031410,GO:0045087,GO:0050829,GO:0050830,GO:0051607,GO:0061844,GO:0090501,GO:0090502	nucleic acid binding|ribonuclease activity|extracellular space|antibacterial humoral response|cytoplasmic vesicle|innate immune response|defense response to Gram-negative bacterium|defense response to Gram-positive bacterium|defense response to virus|antimicrobial humoral immune response mediated by antimicrobial peptide|RNA phosphodiester bond hydrolysis|RNA phosphodiester bond hydrolysis, endon…
Rnf133	0.498067996	0	0.996135993	Inf	Inf	1	1	0	0.030214597	681395	ring finger protein 133	GO:0005737,GO:0005770,GO:0005783,GO:0005789,GO:0005794,GO:0006511,GO:0016021,GO:0046872,GO:0051865,GO:0061630	cytoplasm|late endosome|endoplasmic reticulum|endoplasmic reticulum membrane|Golgi apparatus|ubiquitin-dependent protein catabolic process|integral component of membrane|metal ion binding|protein autoubiquitination|ubiquitin protein ligase activity
Rpl31l1	0.498067996	0	0.996135993	Inf	Inf	1	1	0	0.104657215	688416
Rpl3l	2.490339982	0	4.980679964	Inf	Inf	0.182708175	1	0	0.200149089	287122	ribosomal protein L3-like	GO:0000027,GO:0003723,GO:0003735,GO:0006412,GO:0022625	ribosomal large subunit assembly|RNA binding|structural constituent of ribosome|translation|cytosolic large ribosomal subunit	rno03010,rno05171	Ribosome|Coronavirus disease - COVID-19
Rplp0l1	0.996135993	0	1.992271985	Inf	Inf	0.573868536	1	0	0.103442624	295340				rno03010,rno05171	Ribosome|Coronavirus disease - COVID-19
Rtl3	0.996135993	0	1.992271985	Inf	Inf	0.573868536	1	0	0.036013358	317221		GO:0003676,GO:0008270	nucleic acid binding|zinc ion binding
Rtp2	0.498067996	0	0.996135993	Inf	Inf	1	1	0	0.022527311	303835	receptor (chemosensory) transporter protein 2	GO:0001580,GO:0006612,GO:0009986,GO:0016021,GO:0031849,GO:0051205	detection of chemical stimulus involved in sensory perception of bitter taste|protein targeting to membrane|cell surface|integral component of membrane|olfactory receptor binding|protein insertion into membrane
S100z	0.498067996	0	0.996135993	Inf	Inf	1	1	0	0.035534775	294661	S100 calcium binding protein Z	GO:0005509,GO:0042803,GO:0048306	calcium ion binding|protein homodimerization activity|calcium-dependent protein binding
Saa4	0.996135993	0	1.992271985	Inf	Inf	0.573868536	1	0	0.061365274	365245	serum amyloid A4	GO:0006953,GO:0034364	acute-phase response|high-density lipoprotein particle
Samd3	0.498067996	0	0.996135993	Inf	Inf	1	1	0	0.065060629	685940	sterile alpha motif domain containing 3
Sbk2	1.494203989	0	2.988407978	Inf	Inf	0.372732404	1	0	0.065565799	691411	SH3 domain binding kinase family, member 2	GO:0000165,GO:0000187,GO:0004708,GO:0005524,GO:0006468,GO:0106310,GO:0106311	MAPK cascade|activation of MAPK activity|MAP kinase kinase activity|ATP binding|protein phosphorylation|protein serine kinase activity|protein threonine kinase activity
Serpina1	0.498067996	0	0.996135993	Inf	Inf	1	1	0	0.02823645	24648	serpin family A member 1	GO:0001666,GO:0002020,GO:0004866,GO:0004867,GO:0005515,GO:0005615,GO:0005783,GO:0005794,GO:0006953,GO:0006954,GO:0010035,GO:0010288,GO:0010951,GO:0014070,GO:0032355,GO:0032496,GO:0033986,GO:0034014,GO:0034097,GO:0042802,GO:0043231,GO:0046687,GO:1900004	response to hypoxia|protease binding|endopeptidase inhibitor activity|serine-type endopeptidase inhibitor activity|protein binding|extracellular space|endoplasmic reticulum|Golgi apparatus|acute-phase response|inflammatory response|response to inorganic substance|response to lead ion|negative regulation of endopeptidase activity|response to organic cyclic compound|response to estradiol|response t…	rno04610	Complement and coagulation cascades
Serpina12	0.996135993	0	1.992271985	Inf	Inf	0.573868536	1	0	0.058415988	191570	serpin family A member 12	GO:0004867,GO:0005615,GO:0005886,GO:0006006,GO:0010951,GO:0014068,GO:0045721,GO:0046628,GO:0051055,GO:0090181,GO:0090207	serine-type endopeptidase inhibitor activity|extracellular space|plasma membrane|glucose metabolic process|negative regulation of endopeptidase activity|positive regulation of phosphatidylinositol 3-kinase signaling|negative regulation of gluconeogenesis|positive regulation of insulin receptor signaling pathway|negative regulation of lipid biosynthetic process|regulation of cholesterol metabolic …
Serpina5	0.996135993	0	1.992271985	Inf	Inf	0.573868536	1	0	0.02438661	65051	serpin family A member 5	GO:0001972,GO:0002020,GO:0002080,GO:0004867,GO:0005615,GO:0007283,GO:0009897,GO:0010951,GO:0016020,GO:0031091,GO:0031094,GO:0031210,GO:0032190,GO:0032991,GO:0036024,GO:0036025,GO:0036026,GO:0036027,GO:0036028,GO:0036029,GO:0036030,GO:0045861,GO:0051346,GO:0061107,GO:0070062,GO:0097181,GO:0097182,GO:0097183	retinoic acid binding|protease binding|acrosomal membrane|serine-type endopeptidase inhibitor activity|extracellular space|spermatogenesis|external side of plasma membrane|negative regulation of endopeptidase activity|membrane|platelet alpha granule|platelet dense tubular network|phosphatidylcholine binding|acrosin binding|protein-containing complex|protein C inhibitor-TMPRSS7 complex|protein C i…	rno04610	Complement and coagulation cascades
Serpinb2	3.486475974	0	6.972951949	Inf	Inf	0.098917487	1	0	0.17911907	60325	serpin family B member 2	GO:0004867,GO:0005615,GO:0005737,GO:0010951,GO:0042060,GO:0043066	serine-type endopeptidase inhibitor activity|extracellular space|cytoplasm|negative regulation of endopeptidase activity|wound healing|negative regulation of apoptotic process	rno04610	Complement and coagulation cascades
Serpinb3a	5.976815956	0	11.95363191	Inf	Inf	0.026593442	0.692105265	0	0.4490959	498209		GO:0002020,GO:0004867,GO:0005615,GO:0010466,GO:0010951,GO:0019899,GO:0042270	protease binding|serine-type endopeptidase inhibitor activity|extracellular space|negative regulation of peptidase activity|negative regulation of endopeptidase activity|enzyme binding|protection from natural killer cell mediated cytotoxicity	rno05146	Amoebiasis
Sfrp5	3.486475974	0	6.972951949	Inf	Inf	0.098917487	1	0	0.188214609	309377	secreted frizzled-related protein 5	GO:0005615,GO:0008285,GO:0017147,GO:0030154,GO:0030510,GO:0035567,GO:0036342,GO:0043433,GO:0043508,GO:0048546,GO:0051898,GO:0060028,GO:0060070,GO:0090090,GO:0090175,GO:0090179,GO:2000041,GO:2000057	extracellular space|negative regulation of cell population proliferation|Wnt-protein binding|cell differentiation|regulation of BMP signaling pathway|non-canonical Wnt signaling pathway|post-anal tail morphogenesis|negative regulation of DNA-binding transcription factor activity|negative regulation of JUN kinase activity|digestive tract morphogenesis|negative regulation of protein kinase B signal…	rno04310	Wnt signaling pathway
Sftpb	0.498067996	0	0.996135993	Inf	Inf	1	1	0	0.0336987	192155	surfactant protein B	GO:0001666,GO:0005576,GO:0005615,GO:0005737,GO:0005764,GO:0005771,GO:0006665,GO:0007585,GO:0007623,GO:0009749,GO:0032496,GO:0033189,GO:0050828,GO:0051384,GO:0055093,GO:0070741,GO:0070848,GO:0070849,GO:0071260,GO:0071732,GO:0097208	response to hypoxia|extracellular region|extracellular space|cytoplasm|lysosome|multivesicular body|sphingolipid metabolic process|respiratory gaseous exchange by respiratory system|circadian rhythm|response to glucose|response to lipopolysaccharide|response to vitamin A|regulation of liquid surface tension|response to glucocorticoid|response to hyperoxia|response to interleukin-6|response to gro…
Sh2d7	1.992271985	0	3.984543971	Inf	Inf	0.256541743	1	0	0.081153015	300718
Sigirr	0.498067996	0	0.996135993	Inf	Inf	1	1	0	0.020059954	309106	single Ig and TIR domain containing	GO:0001960,GO:0006953,GO:0007165,GO:0016020,GO:0016021,GO:0032682,GO:0043433	negative regulation of cytokine-mediated signaling pathway|acute-phase response|signal transduction|membrane|integral component of membrane|negative regulation of chemokine production|negative regulation of DNA-binding transcription factor activity
Slc10a2	0.498067996	0	0.996135993	Inf	Inf	1	1	0	0.012533358	29500	solute carrier family 10 member 2	GO:0000502,GO:0005634,GO:0005902,GO:0006814,GO:0008206,GO:0008508,GO:0009617,GO:0015721,GO:0016021,GO:0016324,GO:0055085	proteasome complex|nucleus|microvillus|sodium ion transport|bile acid metabolic process|bile acid:sodium symporter activity|response to bacterium|bile acid and bile salt transport|integral component of membrane|apical plasma membrane|transmembrane transport	rno04976	Bile secretion
Slc16a8	2.988407978	0	5.976815956	Inf	Inf	0.133236696	1	0	0.175343727	65200	solute carrier family 16 member 8	GO:0005887,GO:0008028,GO:0009925,GO:0015129,GO:0015293,GO:0015355,GO:0015718,GO:0016021,GO:0016323,GO:0016324,GO:0035873	integral component of plasma membrane|monocarboxylic acid transmembrane transporter activity|basal plasma membrane|lactate transmembrane transporter activity|symporter activity|secondary active monocarboxylate transmembrane transporter activity|monocarboxylic acid transport|integral component of membrane|basolateral plasma membrane|apical plasma membrane|lactate transmembrane transport
Slc26a5	0.498067996	0	0.996135993	Inf	Inf	1	1	0	0.023928339	83819	solute carrier family 26 member 5	GO:0002931,GO:0003774,GO:0005737,GO:0005886,GO:0005887,GO:0007605,GO:0008271,GO:0008360,GO:0009751,GO:0010996,GO:0015106,GO:0015108,GO:0015116,GO:0015301,GO:0015701,GO:0015755,GO:0016323,GO:0016328,GO:0019531,GO:0019532,GO:0030507,GO:0034220,GO:0034766,GO:0035864,GO:0042391,GO:0042493,GO:0042802,GO:0045793,GO:0090102,GO:0097066,GO:0098656,GO:0120249,GO:1902074,GO:1902358,GO:1902476,GO:2000147	response to ischemia|motor activity|cytoplasm|plasma membrane|integral component of plasma membrane|sensory perception of sound|secondary active sulfate transmembrane transporter activity|regulation of cell shape|response to salicylic acid|response to auditory stimulus|bicarbonate transmembrane transporter activity|chloride transmembrane transporter activity|sulfate transmembrane transporter acti…
Slc28a3	0.498067996	0	0.996135993	Inf	Inf	1	1	0	0.024264899	140944	solute carrier family 28 member 3	GO:0001895,GO:0005337,GO:0005415,GO:0005887,GO:0015213,GO:0015293,GO:0015389,GO:0015390,GO:0015855,GO:0015860,GO:0015862,GO:0015864,GO:0031526,GO:0035725,GO:0072531,GO:1901642,GO:1904823	retina homeostasis|nucleoside transmembrane transporter activity|nucleoside:sodium symporter activity|integral component of plasma membrane|uridine transmembrane transporter activity|symporter activity|pyrimidine- and adenine-specific:sodium symporter activity|purine-specific nucleoside:sodium symporter activity|pyrimidine nucleobase transport|purine nucleoside transmembrane transport|uridine tra…
Slc39a2	6.474883953	0	12.94976791	Inf	Inf	0.020965528	0.603356714	0	0.523128576	305846	solute carrier family 39 member 2	GO:0005385,GO:0005886,GO:0006829,GO:0016020,GO:0016021,GO:0031410,GO:0036464,GO:0071577	zinc ion transmembrane transporter activity|plasma membrane|zinc ion transport|membrane|integral component of membrane|cytoplasmic vesicle|cytoplasmic ribonucleoprotein granule|zinc ion transmembrane transport
Slc3a1	0.498067996	0	0.996135993	Inf	Inf	1	1	0	0.023632274	29484	solute carrier family 3 member 1	GO:0003824,GO:0005774,GO:0005886,GO:0005887,GO:0005975,GO:0006865,GO:0010467,GO:0015810,GO:0015811,GO:0015813,GO:0016324,GO:0031526,GO:0044877,GO:0046982	catalytic activity|vacuolar membrane|plasma membrane|integral component of plasma membrane|carbohydrate metabolic process|amino acid transport|gene expression|aspartate transmembrane transport|L-cystine transport|L-glutamate transmembrane transport|apical plasma membrane|brush border membrane|protein-containing complex binding|protein heterodimerization activity	rno04974	Protein digestion and absorption
Slc45a2	0.498067996	0	0.996135993	Inf	Inf	1	1	0	0.022329786	310152	solute carrier family 45, member 2	GO:0008506,GO:0015770,GO:0016020,GO:0016021,GO:0048066	sucrose:proton symporter activity|sucrose transport|membrane|integral component of membrane|developmental pigmentation
Slc6a5	0.498067996	0	0.996135993	Inf	Inf	1	1	0	0.007569687	171148	solute carrier family 6 member 5	GO:0001504,GO:0005768,GO:0005886,GO:0005887,GO:0015187,GO:0015375,GO:0015816,GO:0031045,GO:0035725,GO:0046872,GO:0060012,GO:0098690,GO:0098810,GO:0099056,GO:1903804	neurotransmitter uptake|endosome|plasma membrane|integral component of plasma membrane|glycine transmembrane transporter activity|glycine:sodium symporter activity|glycine transport|dense core granule|sodium ion transmembrane transport|metal ion binding|synaptic transmission, glycinergic|glycinergic synapse|neurotransmitter reuptake|integral component of presynaptic membrane|glycine import across…	rno04721	Synaptic vesicle cycle
Slc7a15	0.498067996	0	0.996135993	Inf	Inf	1	1	0	0.018428614	298873	solute carrier family 7 (cationic amino acid transporter, y+ system), member 15	GO:0003333,GO:0015179,GO:0015807,GO:0016021,GO:0032991,GO:1902475	amino acid transmembrane transport|L-amino acid transmembrane transporter activity|L-amino acid transport|integral component of membrane|protein-containing complex|L-alpha-amino acid transmembrane transport	rno04974	Protein digestion and absorption
Slco1a5	0.498067996	0	0.996135993	Inf	Inf	1	1	0	0.017814736	80900	solute carrier organic anion transporter family, member 1A5	GO:0005887,GO:0008028,GO:0008514,GO:0015125,GO:0015347,GO:0015349,GO:0015711,GO:0015718,GO:0015721,GO:0031100,GO:0031526,GO:0043252,GO:0050892,GO:0055085,GO:0070327	integral component of plasma membrane|monocarboxylic acid transmembrane transporter activity|organic anion transmembrane transporter activity|bile acid transmembrane transporter activity|sodium-independent organic anion transmembrane transporter activity|thyroid hormone transmembrane transporter activity|organic anion transport|monocarboxylic acid transport|bile acid and bile salt transport|anima…	rno04976	Bile secretion
Slfn1	4.482611967	0	8.965223934	Inf	Inf	0.056784961	1	0	0.222112843	688900
Smarce1l	0.996135993	0	1.992271985	Inf	Inf	0.573868536	1	0	0.088177802	298972				rno04714,rno05225	Thermogenesis|Hepatocellular carcinoma	HMG
Smc1b	0.996135993	0	1.992271985	Inf	Inf	0.573868536	1	0	0.026305871	300121	structural maintenance of chromosomes 1B	GO:0000775,GO:0000794,GO:0000795,GO:0000800,GO:0003677,GO:0005524,GO:0005634,GO:0005654,GO:0005829,GO:0007062,GO:0007064,GO:0008278,GO:0030893,GO:0034991,GO:0051321	chromosome, centromeric region|condensed nuclear chromosome|synaptonemal complex|lateral element|DNA binding|ATP binding|nucleus|nucleoplasm|cytosol|sister chromatid cohesion|mitotic sister chromatid cohesion|cohesin complex|meiotic cohesin complex|nuclear meiotic cohesin complex|meiotic cell cycle	rno04110,rno04114	Cell cycle|Oocyte meiosis
Sp6	1.494203989	0	2.988407978	Inf	Inf	0.372732404	1	0	0.080420807	363672	Sp6 transcription factor	GO:0000978,GO:0000981,GO:0005634,GO:0005829,GO:0006357,GO:0008284,GO:0042481	RNA polymerase II cis-regulatory region sequence-specific DNA binding|DNA-binding transcription factor activity, RNA polymerase II-specific|nucleus|cytosol|regulation of transcription by RNA polymerase II|positive regulation of cell population proliferation|regulation of odontogenesis			zf-C2H2
Spata21	0.498067996	0	0.996135993	Inf	Inf	1	1	0	0.021538396	366491	spermatogenesis associated 21	GO:0005509	calcium ion binding
Spata31d1b	1.494203989	0	2.988407978	Inf	Inf	0.372732404	1	0	0.038819141	502113
Sprr2f	0.498067996	0	0.996135993	Inf	Inf	1	1	0	0.231514445	102550416		GO:0005634,GO:0005737,GO:0032355	nucleus|cytoplasm|response to estradiol
Sptlc3	0.498067996	0	0.996135993	Inf	Inf	1	1	0	0.018850841	296188	serine palmitoyltransferase, long chain base subunit 3	GO:0004758,GO:0008483,GO:0016021,GO:0017059,GO:0030170,GO:0046512,GO:0046513,GO:0046520	serine C-palmitoyltransferase activity|transaminase activity|integral component of membrane|serine C-palmitoyltransferase complex|pyridoxal phosphate binding|sphingosine biosynthetic process|ceramide biosynthetic process|sphingoid biosynthetic process	rno00600,rno04071	Sphingolipid metabolism|Sphingolipid signaling pathway
Srpx2	1.494203989	0	2.988407978	Inf	Inf	0.372732404	1	0	0.062769761	317181	sushi-repeat-containing protein, X-linked 2	GO:0001525,GO:0005102,GO:0005615,GO:0005737,GO:0009986,GO:0036458,GO:0042325,GO:0042802,GO:0048870,GO:0051965,GO:0060076,GO:0071625,GO:0090050,GO:0097060,GO:0098609	angiogenesis|signaling receptor binding|extracellular space|cytoplasm|cell surface|hepatocyte growth factor binding|regulation of phosphorylation|identical protein binding|cell motility|positive regulation of synapse assembly|excitatory synapse|vocalization behavior|positive regulation of cell migration involved in sprouting angiogenesis|synaptic membrane|cell-cell adhesion
Sstr5	0.498067996	0	0.996135993	Inf	Inf	1	1	0	0.038979473	25354	somatostatin receptor 5	GO:0004930,GO:0004994,GO:0005737,GO:0005886,GO:0005887,GO:0007193,GO:0007218,GO:0016021,GO:0032467,GO:0038170,GO:0042277,GO:0042593,GO:0042923,GO:0043005,GO:0050796,GO:0071385	G protein-coupled receptor activity|somatostatin receptor activity|cytoplasm|plasma membrane|integral component of plasma membrane|adenylate cyclase-inhibiting G protein-coupled receptor signaling pathway|neuropeptide signaling pathway|integral component of membrane|positive regulation of cytokinesis|somatostatin signaling pathway|peptide binding|glucose homeostasis|neuropeptide binding|neuron pr…	rno04024,rno04080,rno04935	cAMP signaling pathway|Neuroactive ligand-receptor interaction|Growth hormone synthesis, secretion and action
Stab2	0.498067996	0	0.996135993	Inf	Inf	1	1	0	0.006555508	282580	stabilin 2	GO:0005041,GO:0005044,GO:0005509,GO:0005540,GO:0005737,GO:0005829,GO:0005887,GO:0006897,GO:0007155,GO:0009897,GO:0030169,GO:0042742,GO:0050830	low-density lipoprotein particle receptor activity|scavenger receptor activity|calcium ion binding|hyaluronic acid binding|cytoplasm|cytosol|integral component of plasma membrane|endocytosis|cell adhesion|external side of plasma membrane|low-density lipoprotein particle binding|defense response to bacterium|defense response to Gram-positive bacterium
Stfa2l1	1.494203989	0	2.988407978	Inf	Inf	0.372732404	1	0	0.514229199	408214	stefin A2-like 1	GO:0004869,GO:0005829,GO:0010951	cysteine-type endopeptidase inhibitor activity|cytosol|negative regulation of endopeptidase activity
Stra8	0.498067996	0	0.996135993	Inf	Inf	1	1	0	0.035137869	500079		GO:0005634,GO:0005737,GO:0006357,GO:0007283,GO:0045944,GO:0046983,GO:0048133,GO:0048477,GO:0051321,GO:0071300,GO:0090427	nucleus|cytoplasm|regulation of transcription by RNA polymerase II|spermatogenesis|positive regulation of transcription by RNA polymerase II|protein dimerization activity|male germ-line stem cell asymmetric division|oogenesis|meiotic cell cycle|cellular response to retinoic acid|activation of meiosis
Stx19	0.498067996	0	0.996135993	Inf	Inf	1	1	0	0.045321896	685180	syntaxin 19			rno04130	SNARE interactions in vesicular transport
Sult1c3	1.494203989	0	2.988407978	Inf	Inf	0.372732404	1	0	0.13001581	65185	sulfotransferase family 1C member 3	GO:0004027,GO:0004062,GO:0005737,GO:0005829,GO:0006790,GO:0006805,GO:0008146,GO:0008203,GO:0047704,GO:0050427,GO:0050656,GO:0051923	alcohol sulfotransferase activity|aryl sulfotransferase activity|cytoplasm|cytosol|sulfur compound metabolic process|xenobiotic metabolic process|sulfotransferase activity|cholesterol metabolic process|bile-salt sulfotransferase activity|3'-phosphoadenosine 5'-phosphosulfate metabolic process|3'-phosphoadenosine 5'-phosphosulfate binding|sulfation
Sult6b1	0.498067996	0	0.996135993	Inf	Inf	1	1	0	0.048093378	503103	sulfotransferase family 6B member 1	GO:0005737,GO:0008146,GO:0051923	cytoplasm|sulfotransferase activity|sulfation
Syt15	0.498067996	0	0.996135993	Inf	Inf	1	1	0	0.013214687	306285	synaptotagmin 15	GO:0000149,GO:0001786,GO:0005509,GO:0005544,GO:0005886,GO:0014059,GO:0016021,GO:0016192,GO:0017156,GO:0017158,GO:0019898,GO:0030276,GO:0070382,GO:0071277	SNARE binding|phosphatidylserine binding|calcium ion binding|calcium-dependent phospholipid binding|plasma membrane|regulation of dopamine secretion|integral component of membrane|vesicle-mediated transport|calcium-ion regulated exocytosis|regulation of calcium ion-dependent exocytosis|extrinsic component of membrane|clathrin binding|exocytic vesicle|cellular response to calcium ion
Tas1r3	0.996135993	0	1.992271985	Inf	Inf	0.573868536	1	0	0.0415055	170634	taste 1 receptor member 3	GO:0001582,GO:0004930,GO:0005887,GO:0007186,GO:0008527,GO:0016021,GO:0033041,GO:0050916,GO:0050917,GO:1903767	detection of chemical stimulus involved in sensory perception of sweet taste|G protein-coupled receptor activity|integral component of plasma membrane|G protein-coupled receptor signaling pathway|taste receptor activity|integral component of membrane|sweet taste receptor activity|sensory perception of sweet taste|sensory perception of umami taste|sweet taste receptor complex	rno04742,rno04973	Taste transduction|Carbohydrate digestion and absorption
Tas2r135	0.498067996	0	0.996135993	Inf	Inf	1	1	0	0.05536215	502757	taste receptor, type 2, member 135	GO:0001580,GO:0004930,GO:0007186,GO:0016021,GO:0033038,GO:0050909	detection of chemical stimulus involved in sensory perception of bitter taste|G protein-coupled receptor activity|G protein-coupled receptor signaling pathway|integral component of membrane|bitter taste receptor activity|sensory perception of taste	rno04742	Taste transduction
Tas2r143	0.996135993	0	1.992271985	Inf	Inf	0.573868536	1	0	0.120858388	502756	taste receptor, type 2, member 143	GO:0001580,GO:0004930,GO:0007186,GO:0016021,GO:0033038	detection of chemical stimulus involved in sensory perception of bitter taste|G protein-coupled receptor activity|G protein-coupled receptor signaling pathway|integral component of membrane|bitter taste receptor activity	rno04742	Taste transduction
Testin	0.996135993	0	1.992271985	Inf	Inf	0.573868536	1	0	0.016091421	286916	testin gene	GO:0004197,GO:0005615,GO:0005764,GO:0006955,GO:0030054,GO:0051603	cysteine-type endopeptidase activity|extracellular space|lysosome|immune response|cell junction|proteolysis involved in cellular protein catabolic process
Tex11	0.498067996	0	0.996135993	Inf	Inf	1	1	0	0.013730382	501588		GO:0000712,GO:0000794,GO:0000795,GO:0000801,GO:0005694,GO:0006311,GO:0007060,GO:0007130,GO:0007131,GO:0007140,GO:0008584,GO:0009566,GO:0043066,GO:0051026	resolution of meiotic recombination intermediates|condensed nuclear chromosome|synaptonemal complex|central element|chromosome|meiotic gene conversion|male meiosis chromosome segregation|synaptonemal complex assembly|reciprocal meiotic recombination|male meiotic nuclear division|male gonad development|fertilization|negative regulation of apoptotic process|chiasma assembly
Tex15	1.992271985	0	3.984543971	Inf	Inf	0.256541743	1	0	0.017699764	290803	testis expressed 15, meiosis and synapsis associated	GO:0005634,GO:0005737,GO:0006306,GO:0007129,GO:0007130,GO:0007140,GO:0007283,GO:0009566,GO:0010529,GO:0010569,GO:0030539,GO:0032880,GO:0034502,GO:0048873,GO:1990511	nucleus|cytoplasm|DNA methylation|homologous chromosome pairing at meiosis|synaptonemal complex assembly|male meiotic nuclear division|spermatogenesis|fertilization|negative regulation of transposition|regulation of double-strand break repair via homologous recombination|male genitalia development|regulation of protein localization|protein localization to chromosome|homeostasis of number of cells…
Tex36	0.498067996	0	0.996135993	Inf	Inf	1	1	0	0.028614145	499279	testis expressed 36
Tex43	1.992271985	0	3.984543971	Inf	Inf	0.256541743	1	0	0.360133581	498870	testis expressed 43
Tgm3	0.498067996	0	0.996135993	Inf	Inf	1	1	0	0.020388805	366189	transglutaminase 3	GO:0003810,GO:0003824,GO:0005198,GO:0005509,GO:0005737,GO:0018149,GO:0030216,GO:0031234,GO:0031424,GO:0032991,GO:0043163	protein-glutamine gamma-glutamyltransferase activity|catalytic activity|structural molecule activity|calcium ion binding|cytoplasm|peptide cross-linking|keratinocyte differentiation|extrinsic component of cytoplasmic side of plasma membrane|keratinization|protein-containing complex|cell envelope organization
Tgm7	0.498067996	0	0.996135993	Inf	Inf	1	1	0	0.022835114	102552199		GO:0046872	metal ion binding
Themis	0.498067996	0	0.996135993	Inf	Inf	1	1	0	0.020801181	498985		GO:0005634,GO:0005737,GO:0005911,GO:0008180,GO:0043368,GO:0043383,GO:0050852	nucleus|cytoplasm|cell-cell junction|COP9 signalosome|positive T cell selection|negative T cell selection|T cell receptor signaling pathway
Timd2	6.474883953	0	12.94976791	Inf	Inf	0.020965528	0.603356714	0	0.314872227	287222	T-cell immunoglobulin and mucin domain containing 2	GO:0001618,GO:0001786,GO:0005886,GO:0006826,GO:0006911,GO:0009986,GO:0016021,GO:0033005,GO:0046718,GO:0070287	virus receptor activity|phosphatidylserine binding|plasma membrane|iron ion transport|phagocytosis, engulfment|cell surface|integral component of membrane|positive regulation of mast cell activation|viral entry into host cell|ferritin receptor activity
Tipinl1	0.498067996	0	0.996135993	Inf	Inf	1	1	0	0.045245209	100359731		GO:0000076,GO:0003677,GO:0006974,GO:0031298,GO:0043111,GO:0048478	DNA replication checkpoint signaling|DNA binding|cellular response to DNA damage stimulus|replication fork protection complex|replication fork arrest|replication fork protection
Tktl2	0.498067996	0	0.996135993	Inf	Inf	1	1	0	0.021289744	290685	transketolase-like 2	GO:0004802,GO:0005737,GO:0030976,GO:0046872	transketolase activity|cytoplasm|thiamine pyrophosphate binding|metal ion binding	rno00030	Pentose phosphate pathway
Tlr12	1.494203989	0	2.988407978	Inf	Inf	0.372732404	1	0	0.053373091	362604	toll-like receptor 12	GO:0002224,GO:0004888,GO:0005887,GO:0006954,GO:0038023,GO:0045087	toll-like receptor signaling pathway|transmembrane signaling receptor activity|integral component of plasma membrane|inflammatory response|signaling receptor activity|innate immune response
Tmco2	0.996135993	0	1.992271985	Inf	Inf	0.573868536	1	0	0.089356452	100360795		GO:0016021	integral component of membrane
Tmem125	0.498067996	0	0.996135993	Inf	Inf	1	1	0	0.038063941	313545	transmembrane protein 125	GO:0016021	integral component of membrane
Tmem190	0.498067996	0	0.996135993	Inf	Inf	1	1	0	0.057197686	691446		GO:0002079,GO:0002244,GO:0016021,GO:0043621	inner acrosomal membrane|hematopoietic progenitor cell differentiation|integral component of membrane|protein self-association
Tmem52b	0.498067996	0	0.996135993	Inf	Inf	1	1	0	0.042886798	689963	transmembrane protein 52B	GO:0016021	integral component of membrane
Tmprss12	0.996135993	0	1.992271985	Inf	Inf	0.573868536	1	0	0.06122477	100362912		GO:0001669,GO:0004252,GO:0007339,GO:0016485	acrosomal vesicle|serine-type endopeptidase activity|binding of sperm to zona pellucida|protein processing
Tnfsf14	0.498067996	0	0.996135993	Inf	Inf	1	1	0	0.05374858	301133	TNF superfamily member 14	GO:0005102,GO:0005164,GO:0006915,GO:0006955,GO:0010820,GO:0016021,GO:0031295,GO:0042802,GO:0043027,GO:0043154,GO:0045663,GO:0071260,GO:1901224,GO:1901741	signaling receptor binding|tumor necrosis factor receptor binding|apoptotic process|immune response|positive regulation of T cell chemotaxis|integral component of membrane|T cell costimulation|identical protein binding|cysteine-type endopeptidase inhibitor activity involved in apoptotic process|negative regulation of cysteine-type endopeptidase activity involved in apoptotic process|positive regu…	rno04060,rno04061,rno04064,rno05168	Cytokine-cytokine receptor interaction|Viral protein interaction with cytokine and cytokine receptor|NF-kappa B signaling pathway|Herpes simplex virus 1 infection
Trem1	7.471019945	0	14.94203989	Inf	Inf	0.01326949	0.456592785	0	0.674682549	301229	triggering receptor expressed on myeloid cells 1	GO:0002526,GO:0016021,GO:0016477,GO:0030593,GO:0038023,GO:0070945,GO:0072672,GO:0097110	acute inflammatory response|integral component of membrane|cell migration|neutrophil chemotaxis|signaling receptor activity|neutrophil-mediated killing of gram-negative bacterium|neutrophil extravasation|scaffold protein binding
Trex2	0.498067996	0	0.996135993	Inf	Inf	1	1	0	0.05429425	309275	three prime repair exonuclease 2	GO:0000287,GO:0000738,GO:0003676,GO:0005737,GO:0006259,GO:0006281,GO:0008296,GO:0042803	magnesium ion binding|DNA catabolic process, exonucleolytic|nucleic acid binding|cytoplasm|DNA metabolic process|DNA repair|3'-5'-exodeoxyribonuclease activity|protein homodimerization activity
Trim29	0.498067996	0	0.996135993	Inf	Inf	1	1	0	0.018884123	300656	tripartite motif-containing 29	GO:0000122,GO:0002039,GO:0005737,GO:0008270,GO:0042802,GO:1900181	negative regulation of transcription by RNA polymerase II|p53 binding|cytoplasm|zinc ion binding|identical protein binding|negative regulation of protein localization to nucleus
Trim31	0.498067996	0	0.996135993	Inf	Inf	1	1	0	0.021819599	294208	tripartite motif-containing 31	GO:0003713,GO:0005737,GO:0008270,GO:0010468,GO:0016567,GO:0032897,GO:0045087,GO:0045893,GO:0046597,GO:0051091,GO:0061630,GO:1902186	transcription coactivator activity|cytoplasm|zinc ion binding|regulation of gene expression|protein ubiquitination|negative regulation of viral transcription|innate immune response|positive regulation of transcription, DNA-templated|negative regulation of viral entry into host cell|positive regulation of DNA-binding transcription factor activity|ubiquitin protein ligase activity|regulation of vir…
Trim58	0.498067996	0	0.996135993	Inf	Inf	1	1	0	0.010180818	303167	tripartite motif-containing 58	GO:0000209,GO:0005737,GO:0006511,GO:0008270,GO:0010468,GO:0016567,GO:0045087,GO:0045504,GO:0045505,GO:0051865,GO:0061630,GO:0061931,GO:1902838	protein polyubiquitination|cytoplasm|ubiquitin-dependent protein catabolic process|zinc ion binding|regulation of gene expression|protein ubiquitination|innate immune response|dynein heavy chain binding|dynein intermediate chain binding|protein autoubiquitination|ubiquitin protein ligase activity|positive regulation of erythrocyte enucleation|regulation of nuclear migration along microtubule
Trim63	2.490339982	0	4.980679964	Inf	Inf	0.182708175	1	0	0.142157992	140939	tripartite motif containing 63	GO:0000151,GO:0004842,GO:0005634,GO:0005737,GO:0006513,GO:0008270,GO:0010468,GO:0010614,GO:0014732,GO:0014878,GO:0014894,GO:0016567,GO:0030018,GO:0031430,GO:0031432,GO:0043161,GO:0051384,GO:0061630,GO:0070555,GO:0071549	ubiquitin ligase complex|ubiquitin-protein transferase activity|nucleus|cytoplasm|protein monoubiquitination|zinc ion binding|regulation of gene expression|negative regulation of cardiac muscle hypertrophy|skeletal muscle atrophy|response to electrical stimulus involved in regulation of muscle adaptation|response to denervation involved in regulation of muscle adaptation|protein ubiquitination|Z …
Tsacc	1.494203989	0	2.988407978	Inf	Inf	0.372732404	1	0	0.251472586	361979	TSSK6 activating co-chaperone	GO:0005737,GO:0051087	cytoplasm|chaperone binding
Twist2	0.996135993	0	1.992271985	Inf	Inf	0.573868536	1	0	0.090413925	59327	twist family bHLH transcription factor 2	GO:0000122,GO:0000977,GO:0000981,GO:0001649,GO:0003682,GO:0003700,GO:0005634,GO:0005654,GO:0005667,GO:0005730,GO:0005737,GO:0006357,GO:0008285,GO:0010838,GO:0019904,GO:0030335,GO:0032502,GO:0032720,GO:0043066,GO:0043392,GO:0044092,GO:0045638,GO:0045668,GO:0045892,GO:0046983,GO:0048701,GO:0060325,GO:0061303	negative regulation of transcription by RNA polymerase II|RNA polymerase II transcription regulatory region sequence-specific DNA binding|DNA-binding transcription factor activity, RNA polymerase II-specific|osteoblast differentiation|chromatin binding|DNA-binding transcription factor activity|nucleus|nucleoplasm|transcription regulator complex|nucleolus|cytoplasm|regulation of transcription by R…	rno05205	Proteoglycans in cancer	bHLH
Ugt1a3	2.490339982	0	4.980679964	Inf	Inf	0.182708175	1	0	0.119856201	396551	UDP glycosyltransferase 1 family, polypeptide A3	GO:0005789,GO:0008210,GO:0015020,GO:0016021,GO:0031100,GO:0032782,GO:0052695,GO:0052696,GO:0052697,GO:0070640	endoplasmic reticulum membrane|estrogen metabolic process|glucuronosyltransferase activity|integral component of membrane|animal organ regeneration|bile acid secretion|cellular glucuronidation|flavonoid glucuronidation|xenobiotic glucuronidation|vitamin D3 metabolic process	rno00040,rno00053,rno00140,rno00830,rno00860,rno00980,rno00982,rno00983,rno04976,rno05204	Pentose and glucuronate interconversions|Ascorbate and aldarate metabolism|Steroid hormone biosynthesis|Retinol metabolism|Porphyrin and chlorophyll metabolism|Metabolism of xenobiotics by cytochrome P450|Drug metabolism - cytochrome P450|Drug metabolism - other enzymes|Bile secretion|Chemical carcinogenesis
Ugt1a8	0.498067996	0	0.996135993	Inf	Inf	1	1	0	0.024003517	301595	UDP glucuronosyltransferase family 1 member A8	GO:0004857,GO:0005496,GO:0005504,GO:0005783,GO:0005789,GO:0006631,GO:0008144,GO:0008202,GO:0015020,GO:0016020,GO:0016021,GO:0017144,GO:0018411,GO:0019899,GO:0042803,GO:0043086,GO:0045922,GO:0046226,GO:0046982,GO:0051552,GO:0052695,GO:0052696,GO:0052697,GO:0071407,GO:1904224,GO:2001030	enzyme inhibitor activity|steroid binding|fatty acid binding|endoplasmic reticulum|endoplasmic reticulum membrane|fatty acid metabolic process|drug binding|steroid metabolic process|glucuronosyltransferase activity|membrane|integral component of membrane|drug metabolic process|protein glucuronidation|enzyme binding|protein homodimerization activity|negative regulation of catalytic activity|negati…	rno00040,rno00053,rno00140,rno00830,rno00860,rno00980,rno00982,rno00983,rno04976,rno05204	Pentose and glucuronate interconversions|Ascorbate and aldarate metabolism|Steroid hormone biosynthesis|Retinol metabolism|Porphyrin and chlorophyll metabolism|Metabolism of xenobiotics by cytochrome P450|Drug metabolism - cytochrome P450|Drug metabolism - other enzymes|Bile secretion|Chemical carcinogenesis
Ulbp1	7.471019945	0	14.94203989	Inf	Inf	0.01326949	0.456592785	0	0.130248019	102547056		GO:0002839,GO:0005829,GO:0005886,GO:0005887,GO:0009897,GO:0030101,GO:0032729,GO:0032816,GO:0042267,GO:0042271,GO:0043032,GO:0045429,GO:0046658,GO:0046703	positive regulation of immune response to tumor cell|cytosol|plasma membrane|integral component of plasma membrane|external side of plasma membrane|natural killer cell activation|positive regulation of interferon-gamma production|positive regulation of natural killer cell activation|natural killer cell mediated cytotoxicity|susceptibility to natural killer cell mediated cytotoxicity|positive regu…
Unc5cl	0.996135993	0	1.992271985	Inf	Inf	0.573868536	1	0	0.026567231	301225	unc-5 family C-terminal like	GO:0005042,GO:0006508,GO:0008233,GO:0016020,GO:0016021,GO:0038007,GO:0043123,GO:0046330	netrin receptor activity|proteolysis|peptidase activity|membrane|integral component of membrane|netrin-activated signaling pathway|positive regulation of I-kappaB kinase/NF-kappaB signaling|positive regulation of JNK cascade
Uox	0.498067996	0	0.996135993	Inf	Inf	1	1	0	0.028553036	114768	urate oxidase	GO:0004846,GO:0005777,GO:0005782,GO:0006145,GO:0009115,GO:0019628	urate oxidase activity|peroxisome|peroxisomal matrix|purine nucleobase catabolic process|xanthine catabolic process|urate catabolic process	rno00230,rno00232	Purine metabolism|Caffeine metabolism
Upk3b	0.498067996	0	0.996135993	Inf	Inf	1	1	0	0.014607986	360790		GO:0010629,GO:0016021,GO:0046325	negative regulation of gene expression|integral component of membrane|negative regulation of glucose import
Ushbp1	0.498067996	0	0.996135993	Inf	Inf	1	1	0	0.02116337	290629	USH1 protein network component harmonin binding protein 1	GO:0030165	PDZ domain binding
Utf1	0.498067996	0	0.996135993	Inf	Inf	1	1	0	0.051922172	681901	undifferentiated embryonic cell transcription factor 1	GO:0003713,GO:0005634,GO:0008584,GO:0045944,GO:0071837	transcription coactivator activity|nucleus|male gonad development|positive regulation of transcription by RNA polymerase II|HMG box domain binding
Uts2r	0.498067996	0	0.996135993	Inf	Inf	1	1	0	0.046063598	57305	urotensin 2 receptor	GO:0001604,GO:0003105,GO:0005769,GO:0005886,GO:0005887,GO:0007204,GO:0007218,GO:0008528,GO:0010841,GO:0030307,GO:0035811,GO:0035814,GO:0042493,GO:0045766,GO:0045776,GO:0045777,GO:0045907,GO:0046005,GO:0048146,GO:0055037	urotensin II receptor activity|negative regulation of glomerular filtration|early endosome|plasma membrane|integral component of plasma membrane|positive regulation of cytosolic calcium ion concentration|neuropeptide signaling pathway|G protein-coupled peptide receptor activity|positive regulation of circadian sleep/wake cycle, wakefulness|positive regulation of cell growth|negative regulation of…	rno04080	Neuroactive ligand-receptor interaction
Vnn1	10.95749592	0	21.91499184	Inf	Inf	0.003100544	0.169227488	0	0.498752186	29142	vanin 1	GO:0002526,GO:0002544,GO:0005615,GO:0006954,GO:0015939,GO:0017159,GO:0033089,GO:0045087,GO:0098609,GO:1902176	acute inflammatory response|chronic inflammatory response|extracellular space|inflammatory response|pantothenate metabolic process|pantetheine hydrolase activity|positive regulation of T cell differentiation in thymus|innate immune response|cell-cell adhesion|negative regulation of oxidative stress-induced intrinsic apoptotic signaling pathway	rno00770	Pantothenate and CoA biosynthesis
Vom2r19	0.996135993	0	1.992271985	Inf	Inf	0.573868536	1	0	0.041281233	690729	vomeronasal 2 receptor, 19	GO:0004930,GO:0005887,GO:0007186	G protein-coupled receptor activity|integral component of plasma membrane|G protein-coupled receptor signaling pathway
Vom2r37	0.498067996	0	0.996135993	Inf	Inf	1	1	0	0.007415396	690356	vomeronasal 2 receptor, 37	GO:0004930,GO:0005887,GO:0007186	G protein-coupled receptor activity|integral component of plasma membrane|G protein-coupled receptor signaling pathway
Vom2r52	0.996135993	0	1.992271985	Inf	Inf	0.573868536	1	0	0.036405607	297590	vomeronasal 2 receptor, 52	GO:0004930,GO:0005887,GO:0007186	G protein-coupled receptor activity|integral component of plasma membrane|G protein-coupled receptor signaling pathway
Vom2r80	0.996135993	0	1.992271985	Inf	Inf	0.573868536	1	0	0.041846508	502285	vomeronasal 2 receptor, 80	GO:0004930,GO:0005887,GO:0007186	G protein-coupled receptor activity|integral component of plasma membrane|G protein-coupled receptor signaling pathway
Wdr64	1.494203989	0	2.988407978	Inf	Inf	0.372732404	1	0	0.034961759	689524
Wnt1	0.498067996	0	0.996135993	Inf	Inf	1	1	0	0.022660948	24881	Wnt family member 1	GO:0000578,GO:0001658,GO:0001934,GO:0005109,GO:0005125,GO:0005576,GO:0005615,GO:0005737,GO:0007267,GO:0007520,GO:0008284,GO:0009611,GO:0009986,GO:0010592,GO:0010812,GO:0014902,GO:0016055,GO:0019904,GO:0021527,GO:0021536,GO:0021549,GO:0021551,GO:0021588,GO:0021797,GO:0022004,GO:0022008,GO:0022037,GO:0022408,GO:0030182,GO:0030512,GO:0030514,GO:0030579,GO:0030901,GO:0030917,GO:0031100,GO:0033077,GO:…	embryonic axis specification|branching involved in ureteric bud morphogenesis|positive regulation of protein phosphorylation|frizzled binding|cytokine activity|extracellular region|extracellular space|cytoplasm|cell-cell signaling|myoblast fusion|positive regulation of cell population proliferation|response to wounding|cell surface|positive regulation of lamellipodium assembly|negative regulation…	rno04150,rno04310,rno04390,rno04550,rno04916,rno04934,rno05010,rno05022,rno05165,rno05200,rno05205,rno05217,rno05224,rno05225,rno05226	mTOR signaling pathway|Wnt signaling pathway|Hippo signaling pathway|Signaling pathways regulating pluripotency of stem cells|Melanogenesis|Cushing syndrome|Alzheimer disease|Pathways of neurodegeneration - multiple diseases|Human papillomavirus infection|Pathways in cancer|Proteoglycans in cancer|Basal cell carcinoma|Breast cancer|Hepatocellular carcinoma|Gastric cancer
Wt1	0.498067996	0	0.996135993	Inf	Inf	1	1	0	0.00781412	24883	WT1 transcription factor	GO:0000122,GO:0000976,GO:0000978,GO:0000981,GO:0001228,GO:0001570,GO:0001656,GO:0001657,GO:0001658,GO:0001822,GO:0001823,GO:0003156,GO:0003690,GO:0003700,GO:0003723,GO:0005515,GO:0005634,GO:0005654,GO:0005730,GO:0005737,GO:0005829,GO:0006355,GO:0006357,GO:0006915,GO:0007281,GO:0007283,GO:0007338,GO:0007356,GO:0007507,GO:0007530,GO:0008270,GO:0008285,GO:0008380,GO:0008406,GO:0008584,GO:0009888,GO:…	negative regulation of transcription by RNA polymerase II|transcription cis-regulatory region binding|RNA polymerase II cis-regulatory region sequence-specific DNA binding|DNA-binding transcription factor activity, RNA polymerase II-specific|DNA-binding transcription activator activity, RNA polymerase II-specific|vasculogenesis|metanephros development|ureteric bud development|branching involved i…	rno05202	Transcriptional misregulation in cancer	zf-C2H2
Xkr9	0.996135993	0	1.992271985	Inf	Inf	0.573868536	1	0	0.020956049	497099	XK related 9	GO:0005886,GO:0016020,GO:0016021,GO:0043652,GO:0070782,GO:1902742	plasma membrane|membrane|integral component of membrane|engulfment of apoptotic cell|phosphatidylserine exposure on apoptotic cell surface|apoptotic process involved in development
Xkrx	1.494203989	0	2.988407978	Inf	Inf	0.372732404	1	0	0.055534618	497101	XK related, X-linked	GO:0016021	integral component of membrane
Yipf7	0.498067996	0	0.996135993	Inf	Inf	1	1	0	0.043764187	364147	Yip1 domain family, member 7	GO:0016021	integral component of membrane
Zfp541	0.498067996	0	0.996135993	Inf	Inf	1	1	0	0.010426952	308108	zinc finger protein 541	GO:0000118,GO:0003714,GO:0005634,GO:0005667,GO:0006357,GO:0016575,GO:0045892	histone deacetylase complex|transcription corepressor activity|nucleus|transcription regulator complex|regulation of transcription by RNA polymerase II|histone deacetylation|negative regulation of transcription, DNA-templated			zf-C2H2
Zfp648	0.498067996	0	0.996135993	Inf	Inf	1	1	0	0.010736767	100362915		GO:0000978,GO:0000981,GO:0006357	RNA polymerase II cis-regulatory region sequence-specific DNA binding|DNA-binding transcription factor activity, RNA polymerase II-specific|regulation of transcription by RNA polymerase II			zf-C2H2
LOC103691629	213.1808454	2.007757992	424.3539329	211.3571131	7.723538856	2.68E-17	5.84E-14	0.144254681	29.05919699	103691629
LOC102549828	420.3887464	5.019394979	835.7580979	166.5057445	7.379428141	7.44E-27	4.32E-23	0.515947399	81.8788011	102549828
LOC102551936	473.697508	9.034910962	938.3601051	103.8593639	6.698487484	4.22E-27	3.67E-23	0.81953384	81.12400351	102551936
Ccl6	328.2810106	14.05430594	642.5077153	45.71607577	5.514629664	8.17E-18	2.03E-14	2.274912901	99.12211115	287910	C-C motif chemokine ligand 6	GO:0002548,GO:0005615,GO:0006915,GO:0006954,GO:0007186,GO:0008009,GO:0030593,GO:0031726,GO:0043547,GO:0048020,GO:0048247,GO:0060326,GO:0070098,GO:0070374,GO:0071346,GO:0071347,GO:0071356,GO:2001264	monocyte chemotaxis|extracellular space|apoptotic process|inflammatory response|G protein-coupled receptor signaling pathway|chemokine activity|neutrophil chemotaxis|CCR1 chemokine receptor binding|positive regulation of GTPase activity|CCR chemokine receptor binding|lymphocyte chemotaxis|cell chemotaxis|chemokine-mediated signaling pathway|positive regulation of ERK1 and ERK2 cascade|cellular re…	rno04060,rno04061,rno04062	Cytokine-cytokine receptor interaction|Viral protein interaction with cytokine and cytokine receptor|Chemokine signaling pathway
Mcoln2	38.35897872	2.007757992	74.71019945	37.21075935	5.217647926	5.66E-05	0.007519397	0.042920558	1.522196491	292168	mucolipin TRP cation channel 2	GO:0005765,GO:0005886,GO:0010008,GO:0016020,GO:0016021,GO:0032722,GO:0042802,GO:0051209,GO:0055037,GO:0071639,GO:0071642,GO:0071651,GO:0072345,GO:1905517,GO:1990266,GO:2000341,GO:2000343	lysosomal membrane|plasma membrane|endosome membrane|membrane|integral component of membrane|positive regulation of chemokine production|identical protein binding|release of sequestered calcium ion into cytosol|recycling endosome|positive regulation of monocyte chemotactic protein-1 production|positive regulation of macrophage inflammatory protein 1 alpha production|positive regulation of chemoki…	rno04020	Calcium signaling pathway
LOC102552128	18.93045536	1.003878996	36.85703173	36.71461589	5.198282601	0.001242013	0.08765737	0.144994449	5.073728098	102552128		GO:0031424	keratinization
Acp3	18.43238737	1.003878996	35.86089574	35.72232898	5.158754237	0.00141851	0.096957887	0.006731885	0.2291993	56780	acid phosphatase 3	GO:0003993,GO:0004725,GO:0005615,GO:0005764,GO:0005765,GO:0005771,GO:0005886,GO:0006144,GO:0006772,GO:0007040,GO:0008253,GO:0009117,GO:0012506,GO:0016021,GO:0016311,GO:0016791,GO:0030141,GO:0030175,GO:0031985,GO:0033265,GO:0035335,GO:0042131,GO:0042802,GO:0042803,GO:0045177,GO:0046085,GO:0051930,GO:0052642,GO:0060168	acid phosphatase activity|protein tyrosine phosphatase activity|extracellular space|lysosome|lysosomal membrane|multivesicular body|plasma membrane|purine nucleobase metabolic process|thiamine metabolic process|lysosome organization|5'-nucleotidase activity|nucleotide metabolic process|vesicle membrane|integral component of membrane|dephosphorylation|phosphatase activity|secretory granule|filopod…
Atp6v0d2	88.67546086	5.019394979	172.3315267	34.33312729	5.101529369	1.74E-07	5.31E-05	0.216492477	7.084235644	297932	ATPase H+ transporting V0 subunit D2	GO:0005768,GO:0005769,GO:0007034,GO:0007035,GO:0016020,GO:0016324,GO:0016471,GO:0033179,GO:0033181,GO:0046961,GO:1902600	endosome|early endosome|vacuolar transport|vacuolar acidification|membrane|apical plasma membrane|vacuolar proton-transporting V-type ATPase complex|proton-transporting V-type ATPase, V0 domain|plasma membrane proton-transporting V-type ATPase complex|proton-transporting ATPase activity, rotational mechanism|proton transmembrane transport	rno00190,rno04142,rno04145,rno04721,rno04966,rno05152,rno05165,rno05203,rno05323	Oxidative phosphorylation|Lysosome|Phagosome|Synaptic vesicle cycle|Collecting duct acid secretion|Tuberculosis|Human papillomavirus infection|Viral carcinogenesis|Rheumatoid arthritis
LOC102550512	17.43625137	1.003878996	33.86862375	33.73775514	5.076292077	0.001860538	0.117155909	0.152010309	4.887942065	102550512
Slc47a1	174.3625137	10.03878996	338.6862375	33.73775514	5.076292077	5.21E-11	3.95E-08	0.148888454	4.787557789	360539	solute carrier family 47 member 1	GO:0005886,GO:0006812,GO:0015179,GO:0015297,GO:0015695,GO:0016020,GO:0016021,GO:0016323,GO:0016324,GO:0022857,GO:0031982,GO:0042886,GO:0042887,GO:0042908,GO:0042910,GO:0055085,GO:0061459,GO:0089718,GO:0097638,GO:0098655,GO:1902475	plasma membrane|cation transport|L-amino acid transmembrane transporter activity|antiporter activity|organic cation transport|membrane|integral component of membrane|basolateral plasma membrane|apical plasma membrane|transmembrane transporter activity|vesicle|amide transport|amide transmembrane transporter activity|xenobiotic transport|xenobiotic transmembrane transporter activity|transmembrane t…
Ccl9	50.81455013	3.011636987	98.61746328	32.74546823	5.033223355	1.56E-05	0.002586032	0.131608615	4.107450609	360579	chemokine (C-C motif) ligand 9	GO:0002548,GO:0005615,GO:0006954,GO:0007186,GO:0008009,GO:0030593,GO:0043547,GO:0048020,GO:0048247,GO:0070098,GO:0070374,GO:0071346,GO:0071347,GO:0071356	monocyte chemotaxis|extracellular space|inflammatory response|G protein-coupled receptor signaling pathway|chemokine activity|neutrophil chemotaxis|positive regulation of GTPase activity|CCR chemokine receptor binding|lymphocyte chemotaxis|chemokine-mediated signaling pathway|positive regulation of ERK1 and ERK2 cascade|cellular response to interferon-gamma|cellular response to interleukin-1|cell…	rno04060,rno04061,rno04062	Cytokine-cytokine receptor interaction|Viral protein interaction with cytokine and cytokine receptor|Chemokine signaling pathway
RGD1305807	27.8995508	2.007757992	53.79134361	26.79174673	4.743716738	0.000481384	0.044345879	0.044057526	1.125014095	298077	hypothetical LOC298077	GO:0005886,GO:0016021,GO:0034633,GO:0071939	plasma membrane|integral component of membrane|retinol transport|vitamin A import
Clec5a	116.5827547	9.034910962	224.1305984	24.8071729	4.632685426	6.11E-08	2.11E-05	0.218331409	5.162146401	679787	C-type lectin domain containing 5A	GO:0001618,GO:0001819,GO:0002076,GO:0005829,GO:0005886,GO:0009986,GO:0016021,GO:0030099,GO:0033033,GO:0043066,GO:0045087,GO:0046718	virus receptor activity|positive regulation of cytokine production|osteoblast development|cytosol|plasma membrane|cell surface|integral component of membrane|myeloid cell differentiation|negative regulation of myeloid cell apoptotic process|negative regulation of apoptotic process|innate immune response|viral entry into host cell
Serpina3n	2498.07562	197.7641622	4798.387077	24.26317804	4.600696625	1.52E-34	2.65E-30	5.41561667	125.2369341	24795	serine (or cysteine) peptidase inhibitor, clade A, member 3N	GO:0004867,GO:0005576,GO:0005615,GO:0006954,GO:0009617,GO:0010951,GO:0032496,GO:0034097,GO:0034516,GO:0043434,GO:0071320,GO:0071346,GO:0071347,GO:0071354,GO:0071385	serine-type endopeptidase inhibitor activity|extracellular region|extracellular space|inflammatory response|response to bacterium|negative regulation of endopeptidase activity|response to lipopolysaccharide|response to cytokine|response to vitamin B6|response to peptide hormone|cellular response to cAMP|cellular response to interferon-gamma|cellular response to interleukin-1|cellular response to …
Agtr1a	12.45557141	1.003878996	23.90726383	23.81488598	4.573791737	0.008328719	0.34040216	0.015462903	0.350975138	24180	angiotensin II receptor, type 1a	GO:0001568,GO:0001596,GO:0001819,GO:0001822,GO:0001921,GO:0001991,GO:0002001,GO:0002018,GO:0002019,GO:0002035,GO:0004930,GO:0004945,GO:0005515,GO:0005737,GO:0005768,GO:0005794,GO:0005886,GO:0006885,GO:0006954,GO:0007186,GO:0007200,GO:0007204,GO:0007266,GO:0007507,GO:0007568,GO:0008284,GO:0009651,GO:0010873,GO:0012505,GO:0014823,GO:0016020,GO:0016021,GO:0016323,GO:0019229,GO:0019722,GO:0019901,GO:…	blood vessel development|angiotensin type I receptor activity|positive regulation of cytokine production|kidney development|positive regulation of receptor recycling|regulation of systemic arterial blood pressure by circulatory renin-angiotensin|renin secretion into blood stream|renin-angiotensin regulation of aldosterone production|regulation of renal output by angiotensin|brain renin-angiotensi…	rno04020,rno04022,rno04072,rno04080,rno04261,rno04270,rno04371,rno04614,rno04924,rno04925,rno04927,rno04933,rno04934,rno05171,rno05200,rno05415	Calcium signaling pathway|cGMP-PKG signaling pathway|Phospholipase D signaling pathway|Neuroactive ligand-receptor interaction|Adrenergic signaling in cardiomyocytes|Vascular smooth muscle contraction|Apelin signaling pathway|Renin-angiotensin system|Renin secretion|Aldosterone synthesis and secretion|Cortisol synthesis and secretion|AGE-RAGE signaling pathway in diabetic complications|Cushing sy…
Ptgir	10.96136742	1.003878996	20.91885585	20.83802524	4.381146659	0.013902957	0.468209645	0.04157929	0.825791596	292661	prostaglandin I2 receptor	GO:0005829,GO:0005886,GO:0006954,GO:0007189,GO:0007204,GO:0010642,GO:0016021,GO:0016501,GO:0032496,GO:0048662	cytosol|plasma membrane|inflammatory response|adenylate cyclase-activating G protein-coupled receptor signaling pathway|positive regulation of cytosolic calcium ion concentration|negative regulation of platelet-derived growth factor receptor signaling pathway|integral component of membrane|prostacyclin receptor activity|response to lipopolysaccharide|negative regulation of smooth muscle cell prol…	rno04080,rno04270,rno04611	Neuroactive ligand-receptor interaction|Vascular smooth muscle contraction|Platelet activation
LOC24906	10.46329942	1.003878996	19.92271985	19.84573832	4.310757331	0.016634087	0.527533859	0.032424217	0.61330088	24906	RoBo-1	GO:0005576,GO:0046849	extracellular region|bone remodeling
Il1a	416.0455085	41.15903883	790.9319782	19.2164832	4.264272428	2.30E-15	3.34E-12	0.991642957	18.16210023	24493	interleukin 1 alpha	GO:0001660,GO:0001666,GO:0001819,GO:0002248,GO:0002526,GO:0005125,GO:0005149,GO:0005507,GO:0005615,GO:0005737,GO:0005829,GO:0005886,GO:0006883,GO:0006954,GO:0006955,GO:0007165,GO:0007283,GO:0007507,GO:0008285,GO:0009408,GO:0009986,GO:0010033,GO:0010193,GO:0010243,GO:0010332,GO:0010575,GO:0010628,GO:0010893,GO:0014070,GO:0019221,GO:0031424,GO:0032308,GO:0032496,GO:0032743,GO:0032755,GO:0032760,GO:…	fever generation|response to hypoxia|positive regulation of cytokine production|connective tissue replacement involved in inflammatory response wound healing|acute inflammatory response|cytokine activity|interleukin-1 receptor binding|copper ion binding|extracellular space|cytoplasm|cytosol|plasma membrane|cellular sodium ion homeostasis|inflammatory response|immune response|signal transduction|s…	rno04010,rno04060,rno04217,rno04218,rno04380,rno04640,rno04932,rno04933,rno04940,rno05010,rno05020,rno05022,rno05133,rno05140,rno05152,rno05162,rno05164,rno05321,rno05323,rno05332,rno05418	MAPK signaling pathway|Cytokine-cytokine receptor interaction|Necroptosis|Cellular senescence|Osteoclast differentiation|Hematopoietic cell lineage|Non-alcoholic fatty liver disease|AGE-RAGE signaling pathway in diabetic complications|Type I diabetes mellitus|Alzheimer disease|Prion disease|Pathways of neurodegeneration - multiple diseases|Pertussis|Leishmaniasis|Tuberculosis|Measles|Influenza A|…
Mmp9	234.6829423	24.0930959	445.2727887	18.48134381	4.207997756	1.23E-10	8.23E-08	0.45465596	8.008538362	81687	matrix metallopeptidase 9	GO:0001501,GO:0001503,GO:0001666,GO:0001822,GO:0001934,GO:0001968,GO:0002687,GO:0004175,GO:0004222,GO:0004252,GO:0005515,GO:0005576,GO:0005615,GO:0006508,GO:0006979,GO:0007507,GO:0007566,GO:0007567,GO:0007568,GO:0007584,GO:0008233,GO:0008237,GO:0008270,GO:0009314,GO:0009408,GO:0009612,GO:0009644,GO:0010033,GO:0014070,GO:0019087,GO:0030198,GO:0030335,GO:0030574,GO:0031012,GO:0031915,GO:0032355,GO:…	skeletal system development|ossification|response to hypoxia|kidney development|positive regulation of protein phosphorylation|fibronectin binding|positive regulation of leukocyte migration|endopeptidase activity|metalloendopeptidase activity|serine-type endopeptidase activity|protein binding|extracellular region|extracellular space|proteolysis|response to oxidative stress|heart development|embry…	rno01522,rno04657,rno04668,rno04670,rno04915,rno04926,rno05161,rno05200,rno05202,rno05205,rno05206,rno05215,rno05219,rno05415,rno05417,rno05418	Endocrine resistance|IL-17 signaling pathway|TNF signaling pathway|Leukocyte transendothelial migration|Estrogen signaling pathway|Relaxin signaling pathway|Hepatitis B|Pathways in cancer|Transcriptional misregulation in cancer|Proteoglycans in cancer|MicroRNAs in cancer|Prostate cancer|Bladder cancer|Diabetic cardiomyopathy|Lipid and atherosclerosis|Fluid shear stress and atherosclerosis
Msr1	1294.503307	135.5236644	2453.48295	18.10372351	4.178214551	5.93E-26	2.58E-22	2.173059414	37.49525699	498638	macrophage scavenger receptor 1	GO:0001540,GO:0005044,GO:0005829,GO:0005886,GO:0006898,GO:0006911,GO:0009897,GO:0010629,GO:0010744,GO:0010886,GO:0016021,GO:0030169,GO:0030301,GO:0031410,GO:0034381,GO:0038024,GO:0042953,GO:0071407,GO:0097242	amyloid-beta binding|scavenger receptor activity|cytosol|plasma membrane|receptor-mediated endocytosis|phagocytosis, engulfment|external side of plasma membrane|negative regulation of gene expression|positive regulation of macrophage derived foam cell differentiation|positive regulation of cholesterol storage|integral component of membrane|low-density lipoprotein particle binding|cholesterol tran…	rno04145	Phagosome
Ms4a6b	9.467163432	1.003878996	17.93044787	17.86116449	4.158754237	0.024098147	0.652523849	0.048959164	0.833452001	293750
Ereg	18.43625887	2.007757992	34.86475974	17.36502103	4.118112253	0.004343763	0.212622718	0.135606319	2.244357656	59325	epiregulin	GO:0001525,GO:0001550,GO:0001556,GO:0001819,GO:0005154,GO:0005615,GO:0005886,GO:0007143,GO:0007173,GO:0007267,GO:0008083,GO:0008283,GO:0008284,GO:0008285,GO:0009299,GO:0016021,GO:0019221,GO:0030728,GO:0032755,GO:0042327,GO:0042700,GO:0043434,GO:0043616,GO:0045089,GO:0045740,GO:0045741,GO:0045766,GO:0045840,GO:0045860,GO:0045892,GO:0048146,GO:0048160,GO:0048661,GO:0051151,GO:0051781	angiogenesis|ovarian cumulus expansion|oocyte maturation|positive regulation of cytokine production|epidermal growth factor receptor binding|extracellular space|plasma membrane|female meiotic nuclear division|epidermal growth factor receptor signaling pathway|cell-cell signaling|growth factor activity|cell population proliferation|positive regulation of cell population proliferation|negative regu…	rno04010,rno04012,rno04151,rno05210	MAPK signaling pathway|ErbB signaling pathway|PI3K-Akt signaling pathway|Colorectal cancer
Fxyd2	17.93819087	2.007757992	33.86862375	16.86887757	4.076292077	0.004937685	0.235534341	0.139624284	2.244832652	29639	FXYD domain-containing ion transport regulator 2	GO:0005515,GO:0005886,GO:0005890,GO:0006813,GO:0006814,GO:0008285,GO:0016020,GO:0016323,GO:0017080,GO:0043231,GO:0071475,GO:0098662,GO:0099106,GO:1903406,GO:1903407,GO:2000649	protein binding|plasma membrane|sodium:potassium-exchanging ATPase complex|potassium ion transport|sodium ion transport|negative regulation of cell population proliferation|membrane|basolateral plasma membrane|sodium channel regulator activity|intracellular membrane-bounded organelle|cellular hyperosmotic salinity response|inorganic cation transmembrane transport|ion channel regulator activity|re…	rno04022,rno04024,rno04260,rno04261,rno04911,rno04918,rno04919,rno04960,rno04961,rno04964,rno04970,rno04972,rno04973,rno04974,rno04976,rno04978	cGMP-PKG signaling pathway|cAMP signaling pathway|Cardiac muscle contraction|Adrenergic signaling in cardiomyocytes|Insulin secretion|Thyroid hormone synthesis|Thyroid hormone signaling pathway|Aldosterone-regulated sodium reabsorption|Endocrine and other factor-regulated calcium reabsorption|Proximal tubule bicarbonate reclamation|Salivary secretion|Pancreatic secretion|Carbohydrate digestion an…
Mmp12	1226.275735	137.5314224	2315.020047	16.83266272	4.073191506	1.37E-24	4.76E-21	4.325546282	69.39538834	117033	matrix metallopeptidase 12	GO:0000122,GO:0001046,GO:0001666,GO:0004222,GO:0005509,GO:0005518,GO:0005615,GO:0005634,GO:0005737,GO:0006508,GO:0006606,GO:0008270,GO:0010628,GO:0014070,GO:0030198,GO:0030574,GO:0031012,GO:0032727,GO:0035313,GO:0042493,GO:0043565,GO:0045944,GO:0048286,GO:0050679,GO:0050691,GO:0060054,GO:0060309,GO:0060339,GO:0060340,GO:0060435,GO:0098586,GO:1901163,GO:1904905	negative regulation of transcription by RNA polymerase II|core promoter sequence-specific DNA binding|response to hypoxia|metalloendopeptidase activity|calcium ion binding|collagen binding|extracellular space|nucleus|cytoplasm|proteolysis|protein import into nucleus|zinc ion binding|positive regulation of gene expression|response to organic cyclic compound|extracellular matrix organization|collag…
Tchh	185.8606642	21.08145891	350.6398694	16.63261878	4.055943432	6.80E-09	3.20E-06	0.203863439	3.231742922	310588		GO:0005509,GO:0030674,GO:0045109,GO:0046914	calcium ion binding|protein-macromolecule adaptor activity|intermediate filament organization|transition metal ion binding
Akr1b8	210.2776105	24.0930959	396.4621251	16.45542469	4.040491356	1.70E-09	9.55E-07	1.366715045	21.43502015	286921	aldo-keto reductase family 1, member B8	GO:0004032,GO:0004303,GO:0005739,GO:0005829,GO:0016616,GO:0047834	alditol:NADP+ 1-oxidoreductase activity|estradiol 17-beta-dehydrogenase activity|mitochondrion|cytosol|oxidoreductase activity, acting on the CH-OH group of donors, NAD or NADP as acceptor|D-threo-aldose 1-dehydrogenase activity	rno00040,rno00051,rno00052,rno00561,rno00790	Pentose and glucuronate interconversions|Fructose and mannose metabolism|Galactose metabolism|Glycerolipid metabolism|Folate biosynthesis
Gcgr	78.72958694	9.034910962	148.4242629	16.42786116	4.038072755	1.36E-05	0.002328491	0.193509701	3.029846262	24953	glucagon receptor	GO:0004967,GO:0005768,GO:0005886,GO:0005887,GO:0006887,GO:0007166,GO:0007186,GO:0007188,GO:0007189,GO:0008528,GO:0009267,GO:0009755,GO:0010628,GO:0016021,GO:0017046,GO:0042593,GO:0042594,GO:0070873,GO:0071377	glucagon receptor activity|endosome|plasma membrane|integral component of plasma membrane|exocytosis|cell surface receptor signaling pathway|G protein-coupled receptor signaling pathway|adenylate cyclase-modulating G protein-coupled receptor signaling pathway|adenylate cyclase-activating G protein-coupled receptor signaling pathway|G protein-coupled peptide receptor activity|cellular response to …	rno04080,rno04922	Neuroactive ligand-receptor interaction|Glucagon signaling pathway
Cytip	25.91115032	3.011636987	48.81066364	16.20735296	4.018576579	0.001877348	0.117155909	0.051894618	0.801624961	311047	cytohesin 1 interacting protein	GO:0005654,GO:0005737,GO:0005769,GO:0005829,GO:0005938,GO:0030155	nucleoplasm|cytoplasm|early endosome|cytosol|cell cortex|regulation of cell adhesion
RGD1560455	25.91115032	3.011636987	48.81066364	16.20735296	4.018576579	0.001877348	0.117155909	0.031264929	0.482954663	302377	similar to RIKEN cDNA A630033H20 gene	GO:0004930,GO:0005887,GO:0035025,GO:0051482	G protein-coupled receptor activity|integral component of plasma membrane|positive regulation of Rho protein signal transduction|positive regulation of cytosolic calcium ion concentration involved in phospholipase C-activating G protein-coupled signaling pathway	rno04080	Neuroactive ligand-receptor interaction
MGC105649	154.9688339	18.06982192	291.8678459	16.15222591	4.013661089	6.19E-08	2.11E-05	0.795825668	12.25144031	302884	hypothetical LOC302884	GO:0004129,GO:0005634,GO:0005751,GO:0009617,GO:0022900,GO:1902600	cytochrome-c oxidase activity|nucleus|mitochondrial respiratory chain complex IV|response to bacterium|electron transport chain|proton transmembrane transport
Clec4d	16.94205488	2.007757992	31.87635177	15.87659066	3.988829236	0.006413555	0.286127674	0.123601825	1.870333087	362432	C-type lectin domain family 4, member D	GO:0002250,GO:0002292,GO:0005515,GO:0005537,GO:0005886,GO:0016021,GO:0030887,GO:0034987,GO:0038094,GO:0038187,GO:0042742,GO:0043123,GO:0045087,GO:0046872,GO:0061760	adaptive immune response|T cell differentiation involved in immune response|protein binding|mannose binding|plasma membrane|integral component of membrane|positive regulation of myeloid dendritic cell activation|immunoglobulin receptor binding|Fc-gamma receptor signaling pathway|pattern recognition receptor activity|defense response to bacterium|positive regulation of I-kappaB kinase/NF-kappaB si…	rno04625	C-type lectin receptor signaling pathway
Scimp	47.83775666	6.023273975	89.65223934	14.88430374	3.895719831	0.000278608	0.027561564	0.221466717	3.141765864	691993		GO:0001726,GO:0001772,GO:0002720,GO:0002732,GO:0016020,GO:0016021,GO:0030175,GO:0031256,GO:0031259,GO:0031666,GO:0032735,GO:0032755,GO:0032874,GO:0034138,GO:0034142,GO:0034154,GO:0038123,GO:0043235,GO:0045335,GO:0060090,GO:0070374,GO:0071226,GO:0097197	ruffle|immunological synapse|positive regulation of cytokine production involved in immune response|positive regulation of dendritic cell cytokine production|membrane|integral component of membrane|filopodium|leading edge membrane|uropod membrane|positive regulation of lipopolysaccharide-mediated signaling pathway|positive regulation of interleukin-12 production|positive regulation of interleukin…
LOC100912849	7.972959443	1.003878996	14.94203989	14.88430374	3.895719831	0.043037092	0.887216432	0.032724442	0.464234694	100912849
B4galnt2	15.44785089	2.007757992	28.88794379	14.38816028	3.846810231	0.009632528	0.37281385	0.030816259	0.422592715	688155		GO:0006047,GO:0006486,GO:0008376,GO:0019276,GO:0022408	UDP-N-acetylglucosamine metabolic process|protein glycosylation|acetylgalactosaminyltransferase activity|UDP-N-acetylgalactosamine metabolic process|negative regulation of cell-cell adhesion
Slamf1	15.44785089	2.007757992	28.88794379	14.38816028	3.846810231	0.009632528	0.37281385	0.043265367	0.593311119	498286	signaling lymphocytic activation molecule family member 1	GO:0001779,GO:0001787,GO:0002232,GO:0002277,GO:0002725,GO:0009897,GO:0009986,GO:0010759,GO:0016021,GO:0031338,GO:0032689,GO:0032695,GO:0032715,GO:0032720,GO:0032729,GO:0038023,GO:0042104,GO:0042169,GO:0042802,GO:0045335,GO:0046330,GO:0050790,GO:0070374,GO:2000349,GO:2000510,GO:2000556	natural killer cell differentiation|natural killer cell proliferation|leukocyte chemotaxis involved in inflammatory response|myeloid dendritic cell activation involved in immune response|negative regulation of T cell cytokine production|external side of plasma membrane|cell surface|positive regulation of macrophage chemotaxis|integral component of membrane|regulation of vesicle fusion|negative re…	rno05162	Measles
Clec4e	7.474891447	1.003878996	13.9459039	13.89201682	3.796184158	0.052594895	0.992228568	0.036017729	0.476890264	450223	C-type lectin domain family 4, member E	GO:0001819,GO:0002221,GO:0002292,GO:0005509,GO:0005515,GO:0005886,GO:0006955,GO:0016020,GO:0016021,GO:0030246,GO:0030670,GO:0038023,GO:0038094,GO:0038187,GO:0042742,GO:0045087,GO:0051861,GO:0061760	positive regulation of cytokine production|pattern recognition receptor signaling pathway|T cell differentiation involved in immune response|calcium ion binding|protein binding|plasma membrane|immune response|membrane|integral component of membrane|carbohydrate binding|phagocytic vesicle membrane|signaling receptor activity|Fc-gamma receptor signaling pathway|pattern recognition receptor activity…	rno04625,rno05152	C-type lectin receptor signaling pathway|Tuberculosis
Ms4a4a	44.35128068	6.023273975	82.6792874	13.72663567	3.778906166	0.000500528	0.045389039	0.090187935	1.179911336	361734		GO:0005783,GO:0005794,GO:0005886,GO:0016021,GO:0044853	endoplasmic reticulum|Golgi apparatus|plasma membrane|integral component of membrane|plasma membrane raft
Mmp3	36.87638924	5.019394979	68.7333835	13.69355944	3.775425598	0.000972471	0.073937493	0.152997389	1.996812085	171045	matrix metallopeptidase 3	GO:0001666,GO:0004175,GO:0004222,GO:0005615,GO:0005634,GO:0005739,GO:0005829,GO:0006508,GO:0007565,GO:0008233,GO:0008237,GO:0008270,GO:0009612,GO:0010727,GO:0030163,GO:0030198,GO:0030334,GO:0030335,GO:0030425,GO:0030574,GO:0031012,GO:0031334,GO:0032355,GO:0032496,GO:0032991,GO:0034097,GO:0034612,GO:0042060,GO:0043200,GO:0044297,GO:0044877,GO:0051898,GO:0070555,GO:0071230,GO:0071347,GO:0071460,GO:…	response to hypoxia|endopeptidase activity|metalloendopeptidase activity|extracellular space|nucleus|mitochondrion|cytosol|proteolysis|female pregnancy|peptidase activity|metallopeptidase activity|zinc ion binding|response to mechanical stimulus|negative regulation of hydrogen peroxide metabolic process|protein catabolic process|extracellular matrix organization|regulation of cell migration|posit…	rno04657,rno04668,rno05171,rno05202,rno05215,rno05323,rno05417	IL-17 signaling pathway|TNF signaling pathway|Coronavirus disease - COVID-19|Transcriptional misregulation in cancer|Prostate cancer|Rheumatoid arthritis|Lipid and atherosclerosis
LOC498276	615.4391816	84.32583564	1146.552528	13.59669334	3.765183931	2.61E-16	4.54E-13	2.416082471	31.30991458	498276	Fc gamma receptor II beta	GO:0016021,GO:0038094	integral component of membrane|Fc-gamma receptor signaling pathway	rno04145,rno04380,rno04611,rno04613,rno04666,rno05135,rno05140,rno05150,rno05152,rno05171,rno05322	Phagosome|Osteoclast differentiation|Platelet activation|Neutrophil extracellular trap formation|Fc gamma R-mediated phagocytosis|Yersinia infection|Leishmaniasis|Staphylococcus aureus infection|Tuberculosis|Coronavirus disease - COVID-19|Systemic lupus erythematosus
Alox12	153.4862444	21.08145891	285.8910299	13.56125452	3.76141874	2.64E-07	7.42E-05	0.30948776	4.000185858	287454	arachidonate 12-lipoxygenase, 12S type	GO:0004052,GO:0005506,GO:0005737,GO:0005829,GO:0005886,GO:0006629,GO:0007568,GO:0010628,GO:0010656,GO:0010942,GO:0016020,GO:0016165,GO:0016702,GO:0016787,GO:0019369,GO:0019372,GO:0019395,GO:0033559,GO:0034440,GO:0042383,GO:0043065,GO:0043066,GO:0043280,GO:0043536,GO:0043651,GO:0048661,GO:0050473,GO:0051122,GO:0051901,GO:0061436,GO:0071396,GO:0090331,GO:1901751,GO:1905956,GO:2001303,GO:2001306	arachidonate 12(S)-lipoxygenase activity|iron ion binding|cytoplasm|cytosol|plasma membrane|lipid metabolic process|aging|positive regulation of gene expression|negative regulation of muscle cell apoptotic process|positive regulation of cell death|membrane|linoleate 13S-lipoxygenase activity|oxidoreductase activity, acting on single donors with incorporation of molecular oxygen, incorporation of …	rno00590,rno01523,rno04726,rno04750	Arachidonic acid metabolism|Antifolate resistance|Serotonergic synapse|Inflammatory mediator regulation of TRP channels
Cyp2s1	43.35514469	6.023273975	80.68701541	13.39587337	3.743716738	0.000592274	0.051560444	0.090187935	1.151479738	308445	cytochrome P450, family 2, subfamily s, polypeptide 1	GO:0004497,GO:0004796,GO:0005506,GO:0005737,GO:0005783,GO:0006082,GO:0006690,GO:0006693,GO:0006805,GO:0008392,GO:0008395,GO:0016021,GO:0016712,GO:0016836,GO:0019373,GO:0020037,GO:0042573,GO:0042738,GO:0043231	monooxygenase activity|thromboxane-A synthase activity|iron ion binding|cytoplasm|endoplasmic reticulum|organic acid metabolic process|icosanoid metabolic process|prostaglandin metabolic process|xenobiotic metabolic process|arachidonic acid epoxygenase activity|steroid hydroxylase activity|integral component of membrane|oxidoreductase activity, acting on paired donors, with incorporation or reduc…	rno00830,rno00980	Retinol metabolism|Metabolism of xenobiotics by cytochrome P450
Esam	21.42853835	3.011636987	39.84543971	13.23049221	3.72579483	0.005033814	0.238811285	0.058017615	0.731598313	300519	endothelial cell adhesion molecule	GO:0005886,GO:0005911,GO:0005912,GO:0005923,GO:0007156,GO:0016021,GO:0030833,GO:0032991,GO:0034613,GO:0070830,GO:0098609,GO:0098632,GO:2000249	plasma membrane|cell-cell junction|adherens junction|bicellular tight junction|homophilic cell adhesion via plasma membrane adhesion molecules|integral component of membrane|regulation of actin filament polymerization|protein-containing complex|cellular protein localization|bicellular tight junction assembly|cell-cell adhesion|cell-cell adhesion mediator activity|regulation of actin cytoskeleton …	rno04514,rno04670	Cell adhesion molecules|Leukocyte transendothelial migration
Angptl7	6.976823451	1.003878996	12.94976791	12.89972991	3.689268954	0.064541186	1	0.021707422	0.266885941	102552055		GO:0001525,GO:0005102,GO:0005576,GO:0005615,GO:0042802,GO:0062023,GO:1901346,GO:1903053	angiogenesis|signaling receptor binding|extracellular region|extracellular space|identical protein binding|collagen-containing extracellular matrix|negative regulation of vasculature development involved in avascular cornea development in camera-type eye|regulation of extracellular matrix organization
Fabp4	55.8145876	8.031031966	103.5981432	12.89972991	3.689268954	0.000246283	0.025223767	0.66234653	8.143342632	79451	fatty acid binding protein 4	GO:0005324,GO:0005504,GO:0005515,GO:0005634,GO:0005737,GO:0005811,GO:0005829,GO:0006469,GO:0006631,GO:0008284,GO:0009617,GO:0015909,GO:0036041,GO:0042493,GO:0042632,GO:0045892,GO:0050727,GO:0050729,GO:0050872,GO:0050873,GO:0051384,GO:0051427,GO:0070346,GO:0071285,GO:0071356,GO:0120162	long-chain fatty acid transporter activity|fatty acid binding|protein binding|nucleus|cytoplasm|lipid droplet|cytosol|negative regulation of protein kinase activity|fatty acid metabolic process|positive regulation of cell population proliferation|response to bacterium|long-chain fatty acid transport|long-chain fatty acid binding|response to drug|cholesterol homeostasis|negative regulation of tran…	rno03320,rno04923	PPAR signaling pathway|Regulation of lipolysis in adipocytes
Slc16a3	83.72188141	12.04654795	155.3972149	12.89972991	3.689268954	3.16E-05	0.004740899	0.255103015	3.136411476	80878	solute carrier family 16 member 3	GO:0005886,GO:0005887,GO:0008028,GO:0015129,GO:0015293,GO:0015718,GO:0016021,GO:0016323,GO:0016324,GO:0016328,GO:0031965,GO:0035879,GO:0098688,GO:0099061	plasma membrane|integral component of plasma membrane|monocarboxylic acid transmembrane transporter activity|lactate transmembrane transporter activity|symporter activity|monocarboxylic acid transport|integral component of membrane|basolateral plasma membrane|apical plasma membrane|lateral plasma membrane|nuclear membrane|plasma membrane lactate transport|parallel fiber to Purkinje cell synapse|i…	rno05230	Central carbon metabolism in cancer
Spp1	1130.260885	166.6439133	2093.877857	12.56498251	3.651336758	2.02E-20	5.86E-17	6.099376612	73.04393552	25353	secreted phosphoprotein 1	GO:0001649,GO:0005125,GO:0005178,GO:0005615,GO:0005737,GO:0005794,GO:0006710,GO:0006874,GO:0006883,GO:0006954,GO:0007155,GO:0007165,GO:0010033,GO:0010811,GO:0030154,GO:0030593,GO:0030643,GO:0030644,GO:0031214,GO:0031982,GO:0033280,GO:0034418,GO:0042995,GO:0045177,GO:0045780,GO:0045893,GO:0048471,GO:0048545,GO:0048685,GO:0050840,GO:0071394,GO:0071498,GO:0072044,GO:1990830,GO:2000866	osteoblast differentiation|cytokine activity|integrin binding|extracellular space|cytoplasm|Golgi apparatus|androgen catabolic process|cellular calcium ion homeostasis|cellular sodium ion homeostasis|inflammatory response|cell adhesion|signal transduction|response to organic substance|positive regulation of cell-substrate adhesion|cell differentiation|neutrophil chemotaxis|cellular phosphate ion …	rno04151,rno04371,rno04510,rno04512,rno04620,rno04929,rno05165	PI3K-Akt signaling pathway|Apelin signaling pathway|Focal adhesion|ECM-receptor interaction|Toll-like receptor signaling pathway|GnRH secretion|Human papillomavirus infection
Fcgr2b	424.1075125	65.25213472	782.9628903	11.99903871	3.584846925	2.47E-12	2.63E-09	1.068801766	12.22307405	289211	Fc fragment of IgG receptor IIb	GO:0001540,GO:0001811,GO:0002434,GO:0002638,GO:0002862,GO:0002865,GO:0002924,GO:0004888,GO:0005886,GO:0005887,GO:0006898,GO:0006911,GO:0006952,GO:0007166,GO:0009617,GO:0009897,GO:0009986,GO:0016021,GO:0016064,GO:0016358,GO:0019772,GO:0019864,GO:0019865,GO:0019886,GO:0021549,GO:0030889,GO:0032355,GO:0032456,GO:0032693,GO:0033030,GO:0038096,GO:0043197,GO:0044297,GO:0044877,GO:0045121,GO:0045576,GO:…	amyloid-beta binding|negative regulation of type I hypersensitivity|immune complex clearance|negative regulation of immunoglobulin production|negative regulation of inflammatory response to antigenic stimulus|negative regulation of acute inflammatory response to antigenic stimulus|negative regulation of humoral immune response mediated by circulating immunoglobulin|transmembrane signaling recepto…	rno04145,rno04380,rno04662,rno04666,rno05150,rno05152,rno05162	Phagosome|Osteoclast differentiation|B cell receptor signaling pathway|Fc gamma R-mediated phagocytosis|Staphylococcus aureus infection|Tuberculosis|Measles
Nrtn	6.478755454	1.003878996	11.95363191	11.90744299	3.573791737	0.079558474	1	0.048622386	0.551812589	84423	neurturin	GO:0001755,GO:0005576,GO:0007169,GO:0008083,GO:0021675,GO:0030116,GO:0030424,GO:0030971,GO:0031175	neural crest cell migration|extracellular region|transmembrane receptor protein tyrosine kinase signaling pathway|growth factor activity|nerve development|glial cell-derived neurotrophic factor receptor binding|axon|receptor tyrosine kinase binding|neuron projection development
RT1-DOb	6.478755454	1.003878996	11.95363191	11.90744299	3.573791737	0.079558474	1	0.048790194	0.553717032	365542	RT1 class II, locus DOb	GO:0002250,GO:0002504,GO:0002587,GO:0005764,GO:0016021,GO:0023026,GO:0042613	adaptive immune response|antigen processing and presentation of peptide or polysaccharide antigen via MHC class II|negative regulation of antigen processing and presentation of peptide antigen via MHC class II|lysosome|integral component of membrane|MHC class II protein complex binding|MHC class II protein complex	rno04145,rno04514,rno04612,rno04640,rno04658,rno04659,rno04672,rno04940,rno05140,rno05145,rno05150,rno05152,rno05164,rno05166,rno05168,rno05169,rno05310,rno05320,rno05321,rno05322,rno05323,rno05330,rno05332,rno05416	Phagosome|Cell adhesion molecules|Antigen processing and presentation|Hematopoietic cell lineage|Th1 and Th2 cell differentiation|Th17 cell differentiation|Intestinal immune network for IgA production|Type I diabetes mellitus|Leishmaniasis|Toxoplasmosis|Staphylococcus aureus infection|Tuberculosis|Influenza A|Human T-cell leukemia virus 1 infection|Herpes simplex virus 1 infection|Epstein-Barr vi…
Tbc1d2	77.74506545	12.04654795	143.443583	11.90744299	3.573791737	7.16E-05	0.008974307	0.114046054	1.29430193	313234	TBC1 domain family, member 2	GO:0005096,GO:0005654,GO:0005829,GO:0005886,GO:0006886,GO:0030054,GO:0031410,GO:0043547,GO:0045296,GO:0090630,GO:1902017	GTPase activator activity|nucleoplasm|cytosol|plasma membrane|intracellular protein transport|cell junction|cytoplasmic vesicle|positive regulation of GTPase activity|cadherin binding|activation of GTPase activity|regulation of cilium assembly
Rspo1	18.93819837	3.011636987	34.86475974	11.57668069	3.533149752	0.009030901	0.357356855	0.077782442	0.858227549	313589	R-spondin 1	GO:0001664,GO:0001934,GO:0002090,GO:0005102,GO:0005615,GO:0005634,GO:0007140,GO:0008201,GO:0010468,GO:0030177,GO:0060070,GO:0090263,GO:2000052,GO:2000254	G protein-coupled receptor binding|positive regulation of protein phosphorylation|regulation of receptor internalization|signaling receptor binding|extracellular space|nucleus|male meiotic nuclear division|heparin binding|regulation of gene expression|positive regulation of Wnt signaling pathway|canonical Wnt signaling pathway|positive regulation of canonical Wnt signaling pathway|positive regula…	rno04310	Wnt signaling pathway
Saal1	18.93819837	3.011636987	34.86475974	11.57668069	3.533149752	0.009030901	0.357356855	0.244795822	2.701001854	687992		GO:0005634,GO:0005654,GO:1901647	nucleus|nucleoplasm|positive regulation of synoviocyte proliferation
Gpr84	213.8028015	34.13188586	393.4737171	11.52803917	3.527075238	4.43E-08	1.64E-05	1.225383295	13.46369375	688730	G protein-coupled receptor 84	GO:0001604,GO:0005887,GO:0007218,GO:0008528,GO:0043235	urotensin II receptor activity|integral component of plasma membrane|neuropeptide signaling pathway|G protein-coupled peptide receptor activity|receptor complex
Gpnmb	21569.94475	3516.588122	39623.30138	11.26754115	3.494100814	4.55E-12	4.17E-09	85.82628506	921.693009	113955	glycoprotein nmb	GO:0001649,GO:0001818,GO:0001934,GO:0005178,GO:0005887,GO:0007155,GO:0007165,GO:0007267,GO:0008201,GO:0016021,GO:0030282,GO:0030335,GO:0031410,GO:0031901,GO:0031954,GO:0032720,GO:0033162,GO:0034103,GO:0042130,GO:0045545,GO:0048018,GO:0050868,GO:0070374,GO:1901215,GO:2000134	osteoblast differentiation|negative regulation of cytokine production|positive regulation of protein phosphorylation|integrin binding|integral component of plasma membrane|cell adhesion|signal transduction|cell-cell signaling|heparin binding|integral component of membrane|bone mineralization|positive regulation of cell migration|cytoplasmic vesicle|early endosome membrane|positive regulation of p…
Trem2	282.084575	46.1784338	517.9907162	11.21715644	3.487635093	2.50E-09	1.29E-06	2.242414145	23.9737199	301227	triggering receptor expressed on myeloid cells 2	GO:0001530,GO:0001540,GO:0001774,GO:0001786,GO:0001934,GO:0002282,GO:0002588,GO:0002862,GO:0002931,GO:0004888,GO:0005543,GO:0005886,GO:0005887,GO:0006911,GO:0007613,GO:0008035,GO:0008429,GO:0010468,GO:0010507,GO:0010628,GO:0010822,GO:0010875,GO:0010887,GO:0010891,GO:0010983,GO:0014067,GO:0014068,GO:0016021,GO:0019209,GO:0030169,GO:0030316,GO:0031226,GO:0032006,GO:0032008,GO:0032497,GO:0032499,GO:…	lipopolysaccharide binding|amyloid-beta binding|microglial cell activation|phosphatidylserine binding|positive regulation of protein phosphorylation|microglial cell activation involved in immune response|positive regulation of antigen processing and presentation of peptide antigen via MHC class II|negative regulation of inflammatory response to antigenic stimulus|response to ischemia|transmembran…	rno04380	Osteoclast differentiation
Csn1s1	29.90343729	5.019394979	54.7874796	10.91515608	3.448260854	0.00349458	0.182715104	0.209902877	2.183660742	24284	casein alpha s1	GO:0005576,GO:0005615,GO:0032355,GO:0032570,GO:1903494,GO:1903496	extracellular region|extracellular space|response to estradiol|response to progesterone|response to dehydroepiandrosterone|response to 11-deoxycorticosterone
Dpt	5.980687458	1.003878996	10.95749592	10.91515608	3.448260854	0.098556463	1	0.028836224	0.299988885	289178	dermatopontin	GO:0005576,GO:0008285,GO:0030199	extracellular region|negative regulation of cell population proliferation|collagen fibril organization
Fam3b	5.980687458	1.003878996	10.95749592	10.91515608	3.448260854	0.098556463	1	0.05927446	0.61664382	304050	FAM3 metabolism regulating signaling molecule B	GO:0005615,GO:0030073,GO:0042593	extracellular space|insulin secretion|glucose homeostasis
Fgf10	5.980687458	1.003878996	10.95749592	10.91515608	3.448260854	0.098556463	1	0.087265177	0.907836734	25443	fibroblast growth factor 10	GO:0000132,GO:0000187,GO:0001525,GO:0001656,GO:0001759,GO:0001823,GO:0001934,GO:0001974,GO:0003338,GO:0005104,GO:0005111,GO:0005615,GO:0005634,GO:0005737,GO:0005886,GO:0006935,GO:0007267,GO:0007368,GO:0007431,GO:0007435,GO:0008083,GO:0008201,GO:0008284,GO:0008285,GO:0008543,GO:0008544,GO:0008589,GO:0009880,GO:0009887,GO:0009986,GO:0010468,GO:0010628,GO:0010634,GO:0010838,GO:0014070,GO:0021983,GO:…	establishment of mitotic spindle orientation|activation of MAPK activity|angiogenesis|metanephros development|organ induction|mesonephros development|positive regulation of protein phosphorylation|blood vessel remodeling|metanephros morphogenesis|fibroblast growth factor receptor binding|type 2 fibroblast growth factor receptor binding|extracellular space|nucleus|cytoplasm|plasma membrane|chemota…	rno04010,rno04014,rno04015,rno04020,rno04151,rno04810,rno05200,rno05218,rno05224,rno05226	MAPK signaling pathway|Ras signaling pathway|Rap1 signaling pathway|Calcium signaling pathway|PI3K-Akt signaling pathway|Regulation of actin cytoskeleton|Pathways in cancer|Melanoma|Breast cancer|Gastric cancer
Gucy2c	5.980687458	1.003878996	10.95749592	10.91515608	3.448260854	0.098556463	1	0.004602249	0.047878099	25711	guanylate cyclase 2C	GO:0001653,GO:0004383,GO:0004672,GO:0005524,GO:0005525,GO:0005789,GO:0005886,GO:0006182,GO:0006468,GO:0007165,GO:0007168,GO:0009636,GO:0015643,GO:0016021,GO:0016941,GO:0017046,GO:0035556,GO:0042127	peptide receptor activity|guanylate cyclase activity|protein kinase activity|ATP binding|GTP binding|endoplasmic reticulum membrane|plasma membrane|cGMP biosynthetic process|protein phosphorylation|signal transduction|receptor guanylyl cyclase signaling pathway|response to toxic substance|toxic substance binding|integral component of membrane|natriuretic peptide receptor activity|peptide hormone …	rno00230	Purine metabolism
Plscr2	5.980687458	1.003878996	10.95749592	10.91515608	3.448260854	0.098556463	1	0.032184311	0.334819695	315883	phospholipid scramblase 2	GO:0005634,GO:0005737,GO:0017121,GO:0017128,GO:0071222	nucleus|cytoplasm|plasma membrane phospholipid scrambling|phospholipid scramblase activity|cellular response to lipopolysaccharide
Tspan10	46.84936367	8.031031966	85.66769537	10.66708435	3.415093991	0.001005344	0.07544847	0.158953858	1.616045663	688308		GO:0005887,GO:0019899,GO:0051604,GO:0072594	integral component of plasma membrane|enzyme binding|protein maturation|establishment of protein localization to organelle
Cd14	906.6012541	159.6167603	1653.585748	10.35972503	3.372913807	9.86E-17	1.91E-13	5.903549416	58.29056398	60350	CD14 molecule	GO:0001530,GO:0001819,GO:0002237,GO:0005515,GO:0005615,GO:0005794,GO:0005886,GO:0006898,GO:0006954,GO:0009408,GO:0009617,GO:0009897,GO:0009986,GO:0031362,GO:0031663,GO:0032026,GO:0032481,GO:0032496,GO:0032729,GO:0032757,GO:0032760,GO:0034142,GO:0034612,GO:0045087,GO:0045121,GO:0045471,GO:0045807,GO:0046696,GO:0051602,GO:0070891,GO:0071219,GO:0071222,GO:0071223,GO:0071723,GO:0071726,GO:0071727,GO:…	lipopolysaccharide binding|positive regulation of cytokine production|response to molecule of bacterial origin|protein binding|extracellular space|Golgi apparatus|plasma membrane|receptor-mediated endocytosis|inflammatory response|response to heat|response to bacterium|external side of plasma membrane|cell surface|anchored component of external side of plasma membrane|lipopolysaccharide-mediated …	rno04010,rno04064,rno04145,rno04620,rno04640,rno05132,rno05133,rno05134,rno05146,rno05152,rno05202,rno05221,rno05417	MAPK signaling pathway|NF-kappa B signaling pathway|Phagosome|Toll-like receptor signaling pathway|Hematopoietic cell lineage|Salmonella infection|Pertussis|Legionellosis|Amoebiasis|Tuberculosis|Transcriptional misregulation in cancer|Acute myeloid leukemia|Lipid and atherosclerosis
Anpep	441.5902219	78.30256167	804.8778821	10.27907472	3.3616385	1.51E-11	1.31E-08	1.113539795	10.90929262	81641	alanyl aminopeptidase, membrane	GO:0001525,GO:0004177,GO:0005615,GO:0005737,GO:0005793,GO:0005886,GO:0006508,GO:0007165,GO:0008217,GO:0008237,GO:0008270,GO:0009897,GO:0016020,GO:0016021,GO:0030154,GO:0031526,GO:0035814,GO:0042277,GO:0043171,GO:0070006,GO:0070062	angiogenesis|aminopeptidase activity|extracellular space|cytoplasm|endoplasmic reticulum-Golgi intermediate compartment|plasma membrane|proteolysis|signal transduction|regulation of blood pressure|metallopeptidase activity|zinc ion binding|external side of plasma membrane|membrane|integral component of membrane|cell differentiation|brush border membrane|negative regulation of renal sodium excreti…	rno00480,rno04614,rno04640	Glutathione metabolism|Renin-angiotensin system|Hematopoietic cell lineage
LOC102552542	16.44785838	3.011636987	29.88407978	9.92286916	3.310757331	0.016776147	0.530107971	0.308442736	2.917082002	102552542
Pla2g2a	54.82619461	10.03878996	99.61359927	9.92286916	3.310757331	0.000762446	0.061743903	0.640405832	6.056606649	29692	phospholipase A2 group IIA	GO:0004623,GO:0005509,GO:0005543,GO:0005615,GO:0005741,GO:0005783,GO:0005886,GO:0006644,GO:0006954,GO:0016042,GO:0019835,GO:0030141,GO:0036335,GO:0046337,GO:0046470,GO:0046473,GO:0047498,GO:0048471,GO:0050482,GO:0050830,GO:0070374,GO:0102567,GO:0102568,GO:1902563	phospholipase A2 activity|calcium ion binding|phospholipid binding|extracellular space|mitochondrial outer membrane|endoplasmic reticulum|plasma membrane|phospholipid metabolic process|inflammatory response|lipid catabolic process|cytolysis|secretory granule|intestinal stem cell homeostasis|phosphatidylethanolamine metabolic process|phosphatidylcholine metabolic process|phosphatidic acid metaboli…	rno00564,rno00565,rno00590,rno00591,rno00592,rno04014,rno04270,rno04972,rno04975	Glycerophospholipid metabolism|Ether lipid metabolism|Arachidonic acid metabolism|Linoleic acid metabolism|alpha-Linolenic acid metabolism|Ras signaling pathway|Vascular smooth muscle contraction|Pancreatic secretion|Fat digestion and absorption
Ctsk	202.3588521	37.14352284	367.5741813	9.896050594	3.306852876	3.24E-07	8.83E-05	1.476548972	13.92664767	29175	cathepsin K	GO:0000422,GO:0001957,GO:0001968,GO:0004197,GO:0005518,GO:0005615,GO:0005654,GO:0005737,GO:0005764,GO:0006508,GO:0006590,GO:0006955,GO:0008234,GO:0009897,GO:0016324,GO:0030574,GO:0043231,GO:0043394,GO:0045453,GO:0051603,GO:0061037	autophagy of mitochondrion|intramembranous ossification|fibronectin binding|cysteine-type endopeptidase activity|collagen binding|extracellular space|nucleoplasm|cytoplasm|lysosome|proteolysis|thyroid hormone generation|immune response|cysteine-type peptidase activity|external side of plasma membrane|apical plasma membrane|collagen catabolic process|intracellular membrane-bounded organelle|proteo…	rno04142,rno04210,rno04380,rno04620,rno05323	Lysosome|Apoptosis|Osteoclast differentiation|Toll-like receptor signaling pathway|Rheumatoid arthritis
Rab20	144.0461815	27.10473289	260.9876301	9.628858222	3.267364735	6.07E-06	0.001136762	1.03301187	9.480187563	689377	RAB20, member RAS oncogene family	GO:0003924,GO:0005525,GO:0005794,GO:0006886,GO:0012505,GO:0043231,GO:0045335,GO:0071346,GO:0090383,GO:0090385	GTPase activity|GTP binding|Golgi apparatus|intracellular protein transport|endomembrane system|intracellular membrane-bounded organelle|phagocytic vesicle|cellular response to interferon-gamma|phagosome acidification|phagosome-lysosome fusion
LOC681341	31.89958078	6.023273975	57.77588758	9.592106854	3.26184773	0.00431747	0.212348767	0.079014208	0.722363887	681341		GO:0016021	integral component of membrane	rno05168	Herpes simplex virus 1 infection
Clec7a	145.544257	28.10861188	262.9799021	9.355848065	3.225868433	7.01E-06	0.00127203	0.417437221	3.722298152	502902	C-type lectin domain containing 7A	GO:0001872,GO:0002366,GO:0002732,GO:0005737,GO:0006910,GO:0008037,GO:0008284,GO:0009986,GO:0010628,GO:0016021,GO:0016046,GO:0030246,GO:0030335,GO:0031334,GO:0032491,GO:0032729,GO:0032731,GO:0032733,GO:0032735,GO:0032743,GO:0032755,GO:0032757,GO:0032760,GO:0032874,GO:0032930,GO:0038187,GO:0042802,GO:0043123,GO:0043280,GO:0045429,GO:0050731,GO:0050766,GO:0051251,GO:0051712,GO:0060267,GO:0061760,GO:…	(1->3)-beta-D-glucan binding|leukocyte activation involved in immune response|positive regulation of dendritic cell cytokine production|cytoplasm|phagocytosis, recognition|cell recognition|positive regulation of cell population proliferation|cell surface|positive regulation of gene expression|integral component of membrane|detection of fungus|carbohydrate binding|positive regulation of cell migra…	rno04145,rno04613,rno04625,rno05152	Phagosome|Neutrophil extracellular trap formation|C-type lectin receptor signaling pathway|Tuberculosis
Slpi	40.37447972	8.031031966	72.71792747	9.054618108	3.178653795	0.00282838	0.157836307	0.692775926	5.978603491	84386	secretory leukocyte peptidase inhibitor	GO:0003677,GO:0003729,GO:0004866,GO:0004867,GO:0005615,GO:0005794,GO:0006955,GO:0010951,GO:0019731,GO:0019899,GO:0032091,GO:0032496,GO:0035821,GO:0045071,GO:0045087,GO:0050728	DNA binding|mRNA binding|endopeptidase inhibitor activity|serine-type endopeptidase inhibitor activity|extracellular space|Golgi apparatus|immune response|negative regulation of endopeptidase activity|antibacterial humoral response|enzyme binding|negative regulation of protein binding|response to lipopolysaccharide|modulation of process of other organism|negative regulation of viral genome replic…
Mapk13	60.31268558	12.04654795	108.5788232	9.01327282	3.17205106	0.000804307	0.06365358	0.347096685	2.981740257	29513	mitogen activated protein kinase 13	GO:0004674,GO:0004707,GO:0005524,GO:0005634,GO:0005737,GO:0006468,GO:0006970,GO:0018105,GO:0032755,GO:0034644,GO:0035556,GO:0051403,GO:0070301,GO:0071347,GO:0072709,GO:0072740,GO:0106310,GO:0106311,GO:1903936	protein serine/threonine kinase activity|MAP kinase activity|ATP binding|nucleus|cytoplasm|protein phosphorylation|response to osmotic stress|peptidyl-serine phosphorylation|positive regulation of interleukin-6 production|cellular response to UV|intracellular signal transduction|stress-activated MAPK cascade|cellular response to hydrogen peroxide|cellular response to interleukin-1|cellular respon…	rno01522,rno04010,rno04015,rno04068,rno04071,rno04114,rno04218,rno04261,rno04370,rno04380,rno04550,rno04611,rno04613,rno04620,rno04621,rno04622,rno04625,rno04657,rno04658,rno04659,rno04660,rno04664,rno04668,rno04670,rno04714,rno04722,rno04723,rno04728,rno04750,rno04912,rno04914,rno04917,rno04926,rno04932,rno04933,rno04935,rno05014,rno05020,rno05022,rno05132,rno05133,rno05135,rno05140,rno05142,rno…	Endocrine resistance|MAPK signaling pathway|Rap1 signaling pathway|FoxO signaling pathway|Sphingolipid signaling pathway|Oocyte meiosis|Cellular senescence|Adrenergic signaling in cardiomyocytes|VEGF signaling pathway|Osteoclast differentiation|Signaling pathways regulating pluripotency of stem cells|Platelet activation|Neutrophil extracellular trap formation|Toll-like receptor signaling pathway|…
Ano1	4.984551465	1.003878996	8.965223934	8.930582244	3.158754237	0.153853449	1	0.011766091	0.100149507	309135	anoctamin 1	GO:0005102,GO:0005227,GO:0005229,GO:0005247,GO:0005254,GO:0005654,GO:0005886,GO:0005887,GO:0006812,GO:0006821,GO:0007200,GO:0009897,GO:0015111,GO:0015705,GO:0016324,GO:0017128,GO:0034605,GO:0035774,GO:0042391,GO:0042802,GO:0042803,GO:0045121,GO:0050965,GO:0050966,GO:0055085,GO:0060438,GO:0098655,GO:1901653,GO:1902476	signaling receptor binding|calcium activated cation channel activity|intracellular calcium activated chloride channel activity|voltage-gated chloride channel activity|chloride channel activity|nucleoplasm|plasma membrane|integral component of plasma membrane|cation transport|chloride transport|phospholipase C-activating G protein-coupled receptor signaling pathway|external side of plasma membrane…
Aox3	4.984551465	1.003878996	8.965223934	8.930582244	3.158754237	0.153853449	1	0.009314419	0.07928159	493909	aldehyde oxidase 3	GO:0004031,GO:0005506,GO:0005737,GO:0005829,GO:0009055,GO:0016491,GO:0017144,GO:0022900,GO:0030151,GO:0042803,GO:0043546,GO:0050250,GO:0050660,GO:0051287,GO:0051537,GO:0071949,GO:0102797,GO:0102798	aldehyde oxidase activity|iron ion binding|cytoplasm|cytosol|electron transfer activity|oxidoreductase activity|drug metabolic process|electron transport chain|molybdenum ion binding|protein homodimerization activity|molybdopterin cofactor binding|retinal oxidase activity|flavin adenine dinucleotide binding|NAD binding|2 iron, 2 sulfur cluster binding|FAD binding|geranial:oxygen oxidoreductase ac…	rno00280,rno00350,rno00380,rno00750,rno00760,rno00830,rno00982,rno04630	Valine, leucine and isoleucine degradation|Tyrosine metabolism|Tryptophan metabolism|Vitamin B6 metabolism|Nicotinate and nicotinamide metabolism|Retinol metabolism|Drug metabolism - cytochrome P450|JAK-STAT signaling pathway
Htr2b	49.84551465	10.03878996	89.65223934	8.930582244	3.158754237	0.001599183	0.106679613	0.158397297	1.348231178	29581	5-hydroxytryptamine receptor 2B	GO:0001587,GO:0001755,GO:0001819,GO:0001938,GO:0001965,GO:0002031,GO:0003007,GO:0003300,GO:0004993,GO:0005096,GO:0005515,GO:0005654,GO:0005737,GO:0005886,GO:0005887,GO:0006874,GO:0007186,GO:0007187,GO:0007200,GO:0007202,GO:0007205,GO:0007208,GO:0007268,GO:0007507,GO:0008284,GO:0010507,GO:0010513,GO:0014033,GO:0014065,GO:0014827,GO:0016020,GO:0016310,GO:0019722,GO:0019934,GO:0030425,GO:0030594,GO:…	Gq/11-coupled serotonin receptor activity|neural crest cell migration|positive regulation of cytokine production|positive regulation of endothelial cell proliferation|G-protein alpha-subunit binding|G protein-coupled receptor internalization|heart morphogenesis|cardiac muscle hypertrophy|G protein-coupled serotonin receptor activity|GTPase activator activity|protein binding|nucleoplasm|cytoplasm|…	rno04020,rno04080,rno04540,rno04726,rno04750	Calcium signaling pathway|Neuroactive ligand-receptor interaction|Gap junction|Serotonergic synapse|Inflammatory mediator regulation of TRP channels
Nhlh2	4.984551465	1.003878996	8.965223934	8.930582244	3.158754237	0.153853449	1	0.011025119	0.093842568	295327	nescient helix loop helix 2	GO:0000785,GO:0000977,GO:0000978,GO:0000981,GO:0001228,GO:0006357,GO:0006915,GO:0007422,GO:0007617,GO:0008584,GO:0021535,GO:0021888,GO:0042698,GO:0045944,GO:0046983,GO:0060179,GO:0061629,GO:1990837	chromatin|RNA polymerase II transcription regulatory region sequence-specific DNA binding|RNA polymerase II cis-regulatory region sequence-specific DNA binding|DNA-binding transcription factor activity, RNA polymerase II-specific|DNA-binding transcription activator activity, RNA polymerase II-specific|regulation of transcription by RNA polymerase II|apoptotic process|peripheral nervous system dev…			bHLH
Ptges	29.90730879	6.023273975	53.79134361	8.930582244	3.158754237	0.006190794	0.282428449	0.270563804	2.302959476	59103	prostaglandin E synthase	GO:0001516,GO:0002526,GO:0002544,GO:0004364,GO:0004602,GO:0004667,GO:0005634,GO:0005641,GO:0005737,GO:0006693,GO:0008285,GO:0014070,GO:0016021,GO:0019233,GO:0031620,GO:0032308,GO:0032496,GO:0032526,GO:0034097,GO:0043231,GO:0043295,GO:0048471,GO:0050220,GO:0050727,GO:0051592,GO:0098869	prostaglandin biosynthetic process|acute inflammatory response|chronic inflammatory response|glutathione transferase activity|glutathione peroxidase activity|prostaglandin-D synthase activity|nucleus|nuclear envelope lumen|cytoplasm|prostaglandin metabolic process|negative regulation of cell population proliferation|response to organic cyclic compound|integral component of membrane|sensory percep…	rno00590	Arachidonic acid metabolism
Xcl1	4.984551465	1.003878996	8.965223934	8.930582244	3.158754237	0.153853449	1	0.163906768	1.395126175	171371	X-C motif chemokine ligand 1	GO:0001916,GO:0002548,GO:0002690,GO:0002725,GO:0002726,GO:0005615,GO:0006935,GO:0006954,GO:0006955,GO:0007165,GO:0007186,GO:0007267,GO:0008009,GO:0009615,GO:0010820,GO:0030593,GO:0031640,GO:0032689,GO:0032703,GO:0032733,GO:0035782,GO:0042379,GO:0042803,GO:0043433,GO:0043547,GO:0045892,GO:0048020,GO:0048247,GO:0050727,GO:0051209,GO:0051281,GO:0061844,GO:0070098,GO:0070374,GO:0071346,GO:0071347,GO:…	positive regulation of T cell mediated cytotoxicity|monocyte chemotaxis|positive regulation of leukocyte chemotaxis|negative regulation of T cell cytokine production|positive regulation of T cell cytokine production|extracellular space|chemotaxis|inflammatory response|immune response|signal transduction|G protein-coupled receptor signaling pathway|cell-cell signaling|chemokine activity|response t…	rno04060,rno04061,rno04062	Cytokine-cytokine receptor interaction|Viral protein interaction with cytokine and cytokine receptor|Chemokine signaling pathway
Fcgr2a	534.8605683	112.4344475	957.286689	8.514176127	3.089866935	2.12E-11	1.76E-08	1.495126893	12.13270139	116591	Fc fragment of IgG, low affinity IIa, receptor	GO:0001788,GO:0001798,GO:0001805,GO:0001812,GO:0001813,GO:0001820,GO:0004888,GO:0005794,GO:0005886,GO:0005887,GO:0006910,GO:0006911,GO:0007166,GO:0009897,GO:0009986,GO:0016021,GO:0019770,GO:0019864,GO:0021675,GO:0030593,GO:0032680,GO:0032760,GO:0034987,GO:0038094,GO:0042590,GO:0045576,GO:0050766,GO:0050776,GO:1905449	antibody-dependent cellular cytotoxicity|positive regulation of type IIa hypersensitivity|positive regulation of type III hypersensitivity|positive regulation of type I hypersensitivity|regulation of antibody-dependent cellular cytotoxicity|serotonin secretion|transmembrane signaling receptor activity|Golgi apparatus|plasma membrane|integral component of plasma membrane|phagocytosis, recognition|…	rno04145,rno04380,rno04613,rno04650,rno04666,rno05140,rno05150,rno05152,rno05322	Phagosome|Osteoclast differentiation|Neutrophil extracellular trap formation|Natural killer cell mediated cytotoxicity|Fc gamma R-mediated phagocytosis|Leishmaniasis|Staphylococcus aureus infection|Tuberculosis|Systemic lupus erythematosus
Fmo5	433.1733955	91.35298861	774.9938023	8.483507919	3.084660941	4.11E-10	2.56E-07	1.78365788	14.42194557	246248	flavin containing dimethylaniline monoxygenase 5	GO:0004031,GO:0004497,GO:0004499,GO:0005783,GO:0005789,GO:0005829,GO:0016021,GO:0017144,GO:0050660,GO:0050661,GO:0070995,GO:0090181,GO:0106294	aldehyde oxidase activity|monooxygenase activity|N,N-dimethylaniline monooxygenase activity|endoplasmic reticulum|endoplasmic reticulum membrane|cytosol|integral component of membrane|drug metabolic process|flavin adenine dinucleotide binding|NADP binding|NADPH oxidation|regulation of cholesterol metabolic process|NADPH oxidase H202-forming activity	rno00982	Drug metabolism - cytochrome P450
Oscar	18.94206987	4.015515983	33.86862375	8.434438786	3.076292077	0.018040584	0.552159583	0.096787052	0.778054963	292537	osteoclast associated Ig-like receptor	GO:0009986,GO:0016021,GO:0030316,GO:0038064,GO:0038065,GO:0038094,GO:0045780,GO:0072674	cell surface|integral component of membrane|osteoclast differentiation|collagen receptor activity|collagen-activated signaling pathway|Fc-gamma receptor signaling pathway|positive regulation of bone resorption|multinuclear osteoclast differentiation	rno04380	Osteoclast differentiation
RGD1559588	18.94206987	4.015515983	33.86862375	8.434438786	3.076292077	0.018040584	0.552159583	0.170581704	1.371277864	304349		GO:0016021,GO:0042288	integral component of membrane|MHC class I protein binding
Rasgrp4	9.471034934	2.007757992	16.93431188	8.434438786	3.076292077	0.062090943	1	0.018827313	0.151349629	170668	RAS guanyl releasing protein 4	GO:0005085,GO:0005509,GO:0005654,GO:0005737,GO:0005829,GO:0005886,GO:0007264,GO:0008283,GO:0009991,GO:0016020,GO:0030154,GO:0046579,GO:0050790	guanyl-nucleotide exchange factor activity|calcium ion binding|nucleoplasm|cytoplasm|cytosol|plasma membrane|small GTPase mediated signal transduction|cell population proliferation|response to extracellular stimulus|membrane|cell differentiation|positive regulation of Ras protein signal transduction|regulation of catalytic activity	rno04010,rno04014,rno05200	MAPK signaling pathway|Ras signaling pathway|Pathways in cancer
Slc17a9	66.29724454	14.05430594	118.5401831	8.434438786	3.076292077	0.000761157	0.061743903	0.202784244	1.630148711	362287	solute carrier family 17 member 9	GO:0001409,GO:0005347,GO:0015217,GO:0015866,GO:0015867,GO:0016021,GO:0030141,GO:0042584,GO:1903790	guanine nucleotide transmembrane transporter activity|ATP transmembrane transporter activity|ADP transmembrane transporter activity|ADP transport|ATP transport|integral component of membrane|secretory granule|chromaffin granule membrane|guanine nucleotide transmembrane transport
LOC100909605	1057.269437	224.868895	1889.669978	8.40342982	3.070978277	2.12E-15	3.34E-12	3.883113131	31.10093508	100909605		GO:0004867,GO:0005615,GO:0010951	serine-type endopeptidase inhibitor activity|extracellular space|negative regulation of endopeptidase activity
Cd300a	222.3280299	49.19007079	395.4659891	8.039549095	3.007114589	1.07E-06	0.000244986	1.693669874	12.97768654	501736	Cd300a molecule	GO:0001786,GO:0002552,GO:0004888,GO:0005886,GO:0006898,GO:0008429,GO:0014063,GO:0016020,GO:0016021,GO:0019902,GO:0030889,GO:0032516,GO:0033007,GO:0034125,GO:0038023,GO:0043305,GO:0043407,GO:0048147,GO:0050856,GO:0050859,GO:0051134,GO:0060101,GO:1902564,GO:1902567,GO:1902569,GO:2000417	phosphatidylserine binding|serotonin secretion by mast cell|transmembrane signaling receptor activity|plasma membrane|receptor-mediated endocytosis|phosphatidylethanolamine binding|negative regulation of serotonin secretion|membrane|integral component of membrane|phosphatase binding|negative regulation of B cell proliferation|positive regulation of phosphoprotein phosphatase activity|negative reg…
Stac	49.84938615	11.04266895	88.65610335	8.028503229	3.005131048	0.002409844	0.1400382	0.212440637	1.625582468	363152		GO:0003009,GO:0006936,GO:0030315,GO:0031234,GO:0034605,GO:0035556,GO:0044325,GO:1901385,GO:1901387,GO:1903078,GO:2001259	skeletal muscle contraction|muscle contraction|T-tubule|extrinsic component of cytoplasmic side of plasma membrane|cellular response to heat|intracellular signal transduction|ion channel binding|regulation of voltage-gated calcium channel activity|positive regulation of voltage-gated calcium channel activity|positive regulation of protein localization to plasma membrane|positive regulation of cat…
Insl3	4.486483469	1.003878996	7.969087942	7.938295328	2.988829236	0.194163513	1	0.047320364	0.358024011	114215	insulin-like 3	GO:0001556,GO:0001664,GO:0001701,GO:0002020,GO:0005179,GO:0005615,GO:0007193,GO:0008284,GO:0008285,GO:0008584,GO:0010634,GO:0043066,GO:0043950,GO:0048471,GO:0090303,GO:2000018	oocyte maturation|G protein-coupled receptor binding|in utero embryonic development|protease binding|hormone activity|extracellular space|adenylate cyclase-inhibiting G protein-coupled receptor signaling pathway|positive regulation of cell population proliferation|negative regulation of cell population proliferation|male gonad development|positive regulation of epithelial cell migration|negative …	rno04080,rno04926	Neuroactive ligand-receptor interaction|Relaxin signaling pathway
Klhl38	8.972966937	2.007757992	15.93817588	7.938295328	2.988829236	0.073949565	1	0.017159106	0.129825123	314996	kelch-like family member 38
LOC120101002	4.486483469	1.003878996	7.969087942	7.938295328	2.988829236	0.194163513	1	0.046849905	0.354464535	120101002
LOC120101714	4.486483469	1.003878996	7.969087942	7.938295328	2.988829236	0.194163513	1	0.055222495	0.417811224	120101714
Sytl1	4.486483469	1.003878996	7.969087942	7.938295328	2.988829236	0.194163513	1	0.026461317	0.200205285	297872	synaptotagmin-like 1	GO:0005886,GO:0006886,GO:0006887,GO:0016020,GO:0016192,GO:0019897,GO:0031267,GO:0042043,GO:0042470,GO:0070382	plasma membrane|intracellular protein transport|exocytosis|membrane|vesicle-mediated transport|extrinsic component of plasma membrane|small GTPase binding|neurexin family protein binding|melanosome|exocytic vesicle
Alpk3	185.4438977	42.16291782	328.7248776	7.796540054	2.962834027	5.64E-06	0.001078689	0.453765584	3.371865899	365298	alpha-kinase 3	GO:0004674,GO:0005524,GO:0005634,GO:0006468,GO:0007507,GO:0055007,GO:0055013	protein serine/threonine kinase activity|ATP binding|nucleus|protein phosphorylation|heart development|cardiac muscle cell differentiation|cardiac muscle cell development
LOC120094192	30.90731628	7.02715297	54.7874796	7.796540054	2.962834027	0.008579985	0.3458012	0.224778447	1.670295865	120094192
Sox7	282.154262	64.24825573	500.0602683	7.783250497	2.96037279	1.79E-07	5.37E-05	1.102700012	8.180035963	290317	SRY-box transcription factor 7	GO:0000976,GO:0000978,GO:0000981,GO:0001706,GO:0003700,GO:0005634,GO:0005737,GO:0006355,GO:0006357,GO:0008285,GO:0009653,GO:0030154,GO:0043280,GO:0043565,GO:0045892,GO:0045893,GO:0060828,GO:1990837	transcription cis-regulatory region binding|RNA polymerase II cis-regulatory region sequence-specific DNA binding|DNA-binding transcription factor activity, RNA polymerase II-specific|endoderm formation|DNA-binding transcription factor activity|nucleus|cytoplasm|regulation of transcription, DNA-templated|regulation of transcription by RNA polymerase II|negative regulation of cell population proli…			HMG
Dppa4	12.96138241	3.011636987	22.91112783	7.607533022	2.927428691	0.043109821	0.887216432	0.060221336	0.436647584	685378		GO:0003682,GO:0005634,GO:0048731,GO:0060484	chromatin binding|nucleus|system development|lung-associated mesenchyme development
Nat8f4	12.96138241	3.011636987	22.91112783	7.607533022	2.927428691	0.043109821	0.887216432	0.052101814	0.377775259	102549803		GO:0016021	integral component of membrane	rno00480	Glutathione metabolism
Nos2	111.6678902	26.10085389	197.2349266	7.556646514	2.917746138	0.000145003	0.016393823	0.249532198	1.797183922	24599	nitric oxide synthase 2	GO:0001542,GO:0001666,GO:0001935,GO:0001974,GO:0003779,GO:0004517,GO:0005515,GO:0005516,GO:0005615,GO:0005634,GO:0005737,GO:0005777,GO:0005829,GO:0005886,GO:0006527,GO:0006801,GO:0006809,GO:0006954,GO:0007165,GO:0007199,GO:0007263,GO:0007568,GO:0007623,GO:0008013,GO:0008016,GO:0008217,GO:0008603,GO:0009612,GO:0009617,GO:0009725,GO:0010181,GO:0010629,GO:0012506,GO:0014823,GO:0016137,GO:0016491,GO:…	ovulation from ovarian follicle|response to hypoxia|endothelial cell proliferation|blood vessel remodeling|actin binding|nitric-oxide synthase activity|protein binding|calmodulin binding|extracellular space|nucleus|cytoplasm|peroxisome|cytosol|plasma membrane|arginine catabolic process|superoxide metabolic process|nitric oxide biosynthetic process|inflammatory response|signal transduction|G prote…	rno00220,rno00330,rno04020,rno04066,rno04146,rno04371,rno04926,rno05010,rno05014,rno05022,rno05133,rno05140,rno05142,rno05145,rno05146,rno05152,rno05200,rno05222	Arginine biosynthesis|Arginine and proline metabolism|Calcium signaling pathway|HIF-1 signaling pathway|Peroxisome|Apelin signaling pathway|Relaxin signaling pathway|Alzheimer disease|Amyotrophic lateral sclerosis|Pathways of neurodegeneration - multiple diseases|Pertussis|Leishmaniasis|Chagas disease|Toxoplasmosis|Amoebiasis|Tuberculosis|Pathways in cancer|Small cell lung cancer
Rasgrp3	157.0346644	37.14352284	276.925806	7.455561152	2.898316943	2.44E-05	0.00375365	0.344747058	2.449727238	313874	RAS guanyl releasing protein 3	GO:0005085,GO:0005096,GO:0005509,GO:0005737,GO:0005829,GO:0005886,GO:0007265,GO:0019900,GO:0031267,GO:0032045,GO:0043087,GO:0048471	guanyl-nucleotide exchange factor activity|GTPase activator activity|calcium ion binding|cytoplasm|cytosol|plasma membrane|Ras protein signal transduction|kinase binding|small GTPase binding|guanyl-nucleotide exchange factor complex|regulation of GTPase activity|perinuclear region of cytoplasm	rno04010,rno04014,rno04015,rno04662,rno05200	MAPK signaling pathway|Ras signaling pathway|Rap1 signaling pathway|B cell receptor signaling pathway|Pathways in cancer
Ptprb	8.474898941	2.007757992	14.94203989	7.44215187	2.895719831	0.088302514	1	0.009571401	0.067890788	314843	protein tyrosine phosphatase, receptor type, B	GO:0001525,GO:0004725,GO:0016021,GO:0016311,GO:0030246,GO:0043235,GO:0045296,GO:1990264	angiogenesis|protein tyrosine phosphatase activity|integral component of membrane|dephosphorylation|carbohydrate binding|receptor complex|cadherin binding|peptidyl-tyrosine dephosphorylation involved in inactivation of protein kinase activity	rno04520	Adherens junction
Orm1	105.1891348	25.09697489	185.2812946	7.382614655	2.884131857	0.000222726	0.023082617	1.821773034	12.81862065	24614	orosomucoid 1	GO:0002438,GO:0002439,GO:0002682,GO:0005615,GO:0006953,GO:0014070,GO:0031100,GO:0032496,GO:0032715,GO:0032720,GO:0032731,GO:0032732,GO:0032760,GO:0033197,GO:0036094,GO:0042493,GO:0071300,GO:0071378,GO:0071385	acute inflammatory response to antigenic stimulus|chronic inflammatory response to antigenic stimulus|regulation of immune system process|extracellular space|acute-phase response|response to organic cyclic compound|animal organ regeneration|response to lipopolysaccharide|negative regulation of interleukin-6 production|negative regulation of tumor necrosis factor production|positive regulation of …
Ltb	16.45172989	4.015515983	28.88794379	7.194080141	2.846810231	0.032585507	0.770850909	0.193656969	1.327838411	361795	lymphotoxin beta	GO:0005125,GO:0005164,GO:0005615,GO:0006955,GO:0007165,GO:0010467,GO:0016021,GO:0032735,GO:0043120,GO:0043588,GO:0048535	cytokine activity|tumor necrosis factor receptor binding|extracellular space|immune response|signal transduction|gene expression|integral component of membrane|positive regulation of interleukin-12 production|tumor necrosis factor binding|skin development|lymph node development	rno04060,rno04064,rno05323	Cytokine-cytokine receptor interaction|NF-kappa B signaling pathway|Rheumatoid arthritis
Plau	1317.138398	322.2451576	2312.031639	7.174759913	2.842930556	1.09E-14	1.46E-11	7.800539332	53.34194285	25619	plasminogen activator, urokinase	GO:0001525,GO:0001666,GO:0004252,GO:0005615,GO:0006508,GO:0007283,GO:0007566,GO:0008233,GO:0008284,GO:0009986,GO:0010469,GO:0014823,GO:0014909,GO:0014910,GO:0014911,GO:0016020,GO:0016301,GO:0016310,GO:0030335,GO:0031639,GO:0033628,GO:0035728,GO:0035729,GO:0042060,GO:0042127,GO:0042730,GO:0043403,GO:0055093,GO:0060279,GO:0070997,GO:0071222,GO:0071310,GO:0071333,GO:0071456,GO:0071498,GO:0072734,GO:…	angiogenesis|response to hypoxia|serine-type endopeptidase activity|extracellular space|proteolysis|spermatogenesis|embryo implantation|peptidase activity|positive regulation of cell population proliferation|cell surface|regulation of signaling receptor activity|response to activity|smooth muscle cell migration|regulation of smooth muscle cell migration|positive regulation of smooth muscle cell m…	rno04064,rno04610,rno05202,rno05205,rno05206,rno05215	NF-kappa B signaling pathway|Complement and coagulation cascades|Transcriptional misregulation in cancer|Proteoglycans in cancer|MicroRNAs in cancer|Prostate cancer
Ahrr	105.6910743	26.10085389	185.2812946	7.098667937	2.827548329	0.000275943	0.027453933	0.313217663	2.119141378	498999	aryl-hydrocarbon receptor repressor	GO:0000122,GO:0000976,GO:0004879,GO:0005634,GO:0005654,GO:0005737,GO:0005829,GO:0006357,GO:0006805,GO:0030522,GO:0033235,GO:0034751,GO:0045892,GO:0046983	negative regulation of transcription by RNA polymerase II|transcription cis-regulatory region binding|nuclear receptor activity|nucleus|nucleoplasm|cytoplasm|cytosol|regulation of transcription by RNA polymerase II|xenobiotic metabolic process|intracellular receptor signaling pathway|positive regulation of protein sumoylation|aryl hydrocarbon receptor complex|negative regulation of transcription,…			bHLH
Plaur	117.1582527	29.11249088	205.2040145	7.048658782	2.817348768	0.000178409	0.019660021	1.326769591	8.913306119	50692	plasminogen activator, urokinase receptor	GO:0001934,GO:0005102,GO:0005576,GO:0005886,GO:0005887,GO:0007283,GO:0009986,GO:0019899,GO:0019904,GO:0030162,GO:0030377,GO:0031225,GO:0034112,GO:0038195,GO:0043066,GO:0043388,GO:0043403,GO:0045742,GO:0048762,GO:0060742,GO:0090200,GO:2001243,GO:2001268	positive regulation of protein phosphorylation|signaling receptor binding|extracellular region|plasma membrane|integral component of plasma membrane|spermatogenesis|cell surface|enzyme binding|protein domain specific binding|regulation of proteolysis|urokinase plasminogen activator receptor activity|anchored component of membrane|positive regulation of homotypic cell-cell adhesion|urokinase plasm…	rno04610,rno05205	Complement and coagulation cascades|Proteoglycans in cancer
Mrc1	678.5248268	169.6555503	1187.394103	6.998852094	2.80711832	3.50E-11	2.77E-08	1.826215194	12.1819158	291327	mannose receptor, C type 1	GO:0004888,GO:0005537,GO:0005886,GO:0006898,GO:0009986,GO:0010008,GO:0016021,GO:0038023,GO:0038024,GO:0071222,GO:0071346,GO:0071353	transmembrane signaling receptor activity|mannose binding|plasma membrane|receptor-mediated endocytosis|cell surface|endosome membrane|integral component of membrane|signaling receptor activity|cargo receptor activity|cellular response to lipopolysaccharide|cellular response to interferon-gamma|cellular response to interleukin-4	rno04145,rno05152	Phagosome|Tuberculosis
Cd207	3.988415472	1.003878996	6.972951949	6.946008412	2.796184158	0.247002646	1	0.037031981	0.245159697	502852		GO:0016021,GO:0030246,GO:0051607	integral component of membrane|carbohydrate binding|defense response to virus
Ervfrd-1	3.988415472	1.003878996	6.972951949	6.946008412	2.796184158	0.247002646	1	0.018229476	0.120683062	288602	endogenous retrovirus group FRD member 1, envelope	GO:0000768,GO:0006949,GO:0007520,GO:0016021,GO:0060711	syncytium formation by plasma membrane fusion|syncytium formation|myoblast fusion|integral component of membrane|labyrinthine layer development
Fkbp2	3.988415472	1.003878996	6.972951949	6.946008412	2.796184158	0.247002646	1	0.083158581	0.550527731	293702	FKBP prolyl isomerase 2	GO:0000413,GO:0003755,GO:0061077	protein peptidyl-prolyl isomerization|peptidyl-prolyl cis-trans isomerase activity|chaperone-mediated protein folding
Hspa12b	3.988415472	1.003878996	6.972951949	6.946008412	2.796184158	0.247002646	1	0.016147297	0.106898589	311427	heat shock protein family A (Hsp70) member 12B
Prodh2	23.93049283	6.023273975	41.83771169	6.946008412	2.796184158	0.019089242	0.572052998	0.23366874	1.546937426	361538	proline dehydrogenase 2	GO:0004657,GO:0005739,GO:0006562,GO:0010133,GO:0016645,GO:0071949	proline dehydrogenase activity|mitochondrion|proline catabolic process|proline catabolic process to glutamate|oxidoreductase activity, acting on the CH-NH group of donors|FAD binding	rno00330	Arginine and proline metabolism
Prss16	15.95366189	4.015515983	27.8918078	6.946008412	2.796184158	0.036836496	0.82047623	0.109588827	0.725501661	364719	serine protease 16	GO:0005764,GO:0005768,GO:0006508,GO:0008236,GO:0008239	lysosome|endosome|proteolysis|serine-type peptidase activity|dipeptidyl-peptidase activity
Zfp804b	3.988415472	1.003878996	6.972951949	6.946008412	2.796184158	0.247002646	1	0.006770574	0.04482266	499994
Cxcl3	50.85326515	13.05042694	88.65610335	6.793348886	2.764122949	0.004352452	0.212622718	0.516600038	3.344838698	171551	C-X-C motif chemokine ligand 3	GO:0005615,GO:0006954,GO:0007204,GO:0008009,GO:0030593,GO:0031640,GO:0032496,GO:0045236,GO:0061844,GO:0070098,GO:0071222	extracellular space|inflammatory response|positive regulation of cytosolic calcium ion concentration|chemokine activity|neutrophil chemotaxis|killing of cells of other organism|response to lipopolysaccharide|CXCR chemokine receptor binding|antimicrobial humoral immune response mediated by antimicrobial peptide|chemokine-mediated signaling pathway|cellular response to lipopolysaccharide	rno04060,rno04061,rno04062,rno04064,rno04621,rno04657,rno04668,rno05134,rno05146,rno05167,rno05323,rno05417	Cytokine-cytokine receptor interaction|Viral protein interaction with cytokine and cytokine receptor|Chemokine signaling pathway|NF-kappa B signaling pathway|NOD-like receptor signaling pathway|IL-17 signaling pathway|TNF signaling pathway|Legionellosis|Amoebiasis|Kaposi sarcoma-associated herpesvirus infection|Rheumatoid arthritis|Lipid and atherosclerosis
Ccl12	148.57138	38.14740184	258.9953581	6.78933153	2.763269535	6.83E-05	0.008621359	3.979292091	25.74955101	287562	chemokine (C-C motif) ligand 12	GO:0001525,GO:0002548,GO:0002687,GO:0004672,GO:0005615,GO:0006468,GO:0006816,GO:0006874,GO:0006887,GO:0006954,GO:0007010,GO:0007186,GO:0007267,GO:0008009,GO:0008360,GO:0016004,GO:0030593,GO:0031640,GO:0031727,GO:0043547,GO:0044828,GO:0048020,GO:0048245,GO:0048247,GO:0061844,GO:0070098,GO:0070374,GO:0070664,GO:0071346,GO:0071347,GO:0071356	angiogenesis|monocyte chemotaxis|positive regulation of leukocyte migration|protein kinase activity|extracellular space|protein phosphorylation|calcium ion transport|cellular calcium ion homeostasis|exocytosis|inflammatory response|cytoskeleton organization|G protein-coupled receptor signaling pathway|cell-cell signaling|chemokine activity|regulation of cell shape|phospholipase activator activity…	rno04060,rno04061,rno04062,rno04621,rno04657,rno04668,rno04933,rno05135,rno05142,rno05144,rno05163,rno05164,rno05168,rno05171,rno05323,rno05417,rno05418	Cytokine-cytokine receptor interaction|Viral protein interaction with cytokine and cytokine receptor|Chemokine signaling pathway|NOD-like receptor signaling pathway|IL-17 signaling pathway|TNF signaling pathway|AGE-RAGE signaling pathway in diabetic complications|Yersinia infection|Chagas disease|Malaria|Human cytomegalovirus infection|Influenza A|Herpes simplex virus 1 infection|Coronavirus dise…
Igf2	113.1737087	29.11249088	197.2349266	6.774924461	2.760204861	0.000269459	0.026962965	0.23097003	1.491409531	24483	insulin-like growth factor 2	GO:0000122,GO:0001649,GO:0001701,GO:0001892,GO:0001934,GO:0005158,GO:0005159,GO:0005178,GO:0005179,GO:0005515,GO:0005615,GO:0006006,GO:0007565,GO:0007613,GO:0008083,GO:0008284,GO:0009314,GO:0009887,GO:0014070,GO:0016021,GO:0031017,GO:0031056,GO:0031667,GO:0032355,GO:0035094,GO:0038028,GO:0040018,GO:0042060,GO:0042104,GO:0042493,GO:0043085,GO:0043410,GO:0043536,GO:0043539,GO:0045471,GO:0045725,GO:…	negative regulation of transcription by RNA polymerase II|osteoblast differentiation|in utero embryonic development|embryonic placenta development|positive regulation of protein phosphorylation|insulin receptor binding|insulin-like growth factor receptor binding|integrin binding|hormone activity|protein binding|extracellular space|glucose metabolic process|female pregnancy|memory|growth factor ac…	rno04010,rno04014,rno04151,rno05200,rno05205,rno05225	MAPK signaling pathway|Ras signaling pathway|PI3K-Akt signaling pathway|Pathways in cancer|Proteoglycans in cancer|Hepatocellular carcinoma
Hk3	563.3820751	146.5663334	980.1978168	6.687741954	2.741519182	7.78E-10	4.67E-07	2.667523071	17.00295939	25060	hexokinase 3	GO:0001678,GO:0004340,GO:0004396,GO:0005515,GO:0005524,GO:0005536,GO:0005739,GO:0005829,GO:0006002,GO:0006096,GO:0008865,GO:0019158,GO:0019318,GO:0019899,GO:0032991,GO:0042562,GO:0046835,GO:0051156,GO:1901299	cellular glucose homeostasis|glucokinase activity|hexokinase activity|protein binding|ATP binding|glucose binding|mitochondrion|cytosol|fructose 6-phosphate metabolic process|glycolytic process|fructokinase activity|mannokinase activity|hexose metabolic process|enzyme binding|protein-containing complex|hormone binding|carbohydrate phosphorylation|glucose 6-phosphate metabolic process|negative reg…	rno00010,rno00051,rno00052,rno00500,rno00520,rno00524,rno04066,rno04910,rno04930,rno04973,rno05230	Glycolysis / Gluconeogenesis|Fructose and mannose metabolism|Galactose metabolism|Starch and sucrose metabolism|Amino sugar and nucleotide sugar metabolism|Neomycin, kanamycin and gentamicin biosynthesis|HIF-1 signaling pathway|Insulin signaling pathway|Type II diabetes mellitus|Carbohydrate digestion and absorption|Central carbon metabolism in cancer
Hpse	22.93435684	6.023273975	39.84543971	6.615246107	2.72579483	0.023221997	0.639737422	0.108122055	0.681706013	64537	heparanase	GO:0005576,GO:0005634,GO:0005654,GO:0005764,GO:0005765,GO:0007160,GO:0010575,GO:0030194,GO:0030200,GO:0030305,GO:0031012,GO:0033690,GO:0042060,GO:0043231,GO:0045121,GO:0045545,GO:0051797,GO:0051798,GO:0051897,GO:0060055,GO:0061042,GO:1904974	extracellular region|nucleus|nucleoplasm|lysosome|lysosomal membrane|cell-matrix adhesion|positive regulation of vascular endothelial growth factor production|positive regulation of blood coagulation|heparan sulfate proteoglycan catabolic process|heparanase activity|extracellular matrix|positive regulation of osteoblast proliferation|wound healing|intracellular membrane-bounded organelle|membrane…	rno00531,rno05205	Glycosaminoglycan degradation|Proteoglycans in cancer
Ngf	63.81851906	17.06594293	110.5710952	6.479049863	2.695782261	0.002822316	0.157836307	0.888459514	5.486378812	310738	nerve growth factor	GO:0001934,GO:0004857,GO:0005163,GO:0005576,GO:0005615,GO:0005788,GO:0005796,GO:0006919,GO:0006954,GO:0007169,GO:0007171,GO:0007422,GO:0007568,GO:0007613,GO:0007623,GO:0008021,GO:0008083,GO:0008191,GO:0008284,GO:0008289,GO:0008344,GO:0008625,GO:0008656,GO:0009314,GO:0009612,GO:0010033,GO:0010193,GO:0010628,GO:0010951,GO:0010976,GO:0014042,GO:0014070,GO:0019233,GO:0021675,GO:0030297,GO:0030307,GO:…	positive regulation of protein phosphorylation|enzyme inhibitor activity|nerve growth factor receptor binding|extracellular region|extracellular space|endoplasmic reticulum lumen|Golgi lumen|activation of cysteine-type endopeptidase activity involved in apoptotic process|inflammatory response|transmembrane receptor protein tyrosine kinase signaling pathway|activation of transmembrane receptor pro…	rno04010,rno04014,rno04015,rno04020,rno04060,rno04151,rno04210,rno04722,rno04750	MAPK signaling pathway|Ras signaling pathway|Rap1 signaling pathway|Calcium signaling pathway|Cytokine-cytokine receptor interaction|PI3K-Akt signaling pathway|Apoptosis|Neurotrophin signaling pathway|Inflammatory mediator regulation of TRP channels
Hcrtr2	7.478762948	2.007757992	12.94976791	6.449864954	2.689268954	0.126984288	1	0.036588699	0.224923286	25605	hypocretin receptor 2	GO:0004930,GO:0005887,GO:0007186,GO:0007200,GO:0007218,GO:0007631,GO:0010840,GO:0016499,GO:0017046,GO:0022410,GO:0051480	G protein-coupled receptor activity|integral component of plasma membrane|G protein-coupled receptor signaling pathway|phospholipase C-activating G protein-coupled receptor signaling pathway|neuropeptide signaling pathway|feeding behavior|regulation of circadian sleep/wake cycle, wakefulness|orexin receptor activity|peptide hormone binding|circadian sleep/wake cycle process|regulation of cytosoli…	rno04080	Neuroactive ligand-receptor interaction
Plcb2	280.2045766	75.29092468	485.1182285	6.443249708	2.687788507	1.60E-06	0.000353499	0.811225636	4.981767498	85240	phospholipase C, beta 2	GO:0001580,GO:0004435,GO:0004629,GO:0005509,GO:0005543,GO:0005737,GO:0005794,GO:0005829,GO:0005886,GO:0007200,GO:0016042,GO:0031680,GO:0031683,GO:0035556,GO:0046488,GO:0048015,GO:0050913	detection of chemical stimulus involved in sensory perception of bitter taste|phosphatidylinositol phospholipase C activity|phospholipase C activity|calcium ion binding|phospholipid binding|cytoplasm|Golgi apparatus|cytosol|plasma membrane|phospholipase C-activating G protein-coupled receptor signaling pathway|lipid catabolic process|G-protein beta/gamma-subunit complex|G-protein beta/gamma-subun…	rno00562,rno04015,rno04020,rno04022,rno04062,rno04070,rno04071,rno04072,rno04261,rno04270,rno04310,rno04371,rno04540,rno04611,rno04613,rno04621,rno04713,rno04720,rno04723,rno04724,rno04725,rno04726,rno04728,rno04730,rno04742,rno04750,rno04911,rno04912,rno04915,rno04916,rno04918,rno04919,rno04921,rno04922,rno04924,rno04925,rno04926,rno04927,rno04928,rno04929,rno04933,rno04934,rno04935,rno04961,rno…	Inositol phosphate metabolism|Rap1 signaling pathway|Calcium signaling pathway|cGMP-PKG signaling pathway|Chemokine signaling pathway|Phosphatidylinositol signaling system|Sphingolipid signaling pathway|Phospholipase D signaling pathway|Adrenergic signaling in cardiomyocytes|Vascular smooth muscle contraction|Wnt signaling pathway|Apelin signaling pathway|Gap junction|Platelet activation|Neutroph…
Slc37a2	584.8415855	157.6090023	1012.074169	6.421423609	2.682893174	1.04E-09	6.02E-07	2.211210483	13.53312929	500973	solute carrier family 37 member 2	GO:0015760,GO:0030176,GO:0035435,GO:0061513	glucose-6-phosphate transport|integral component of endoplasmic reticulum membrane|phosphate ion transmembrane transport|glucose 6-phosphate:inorganic phosphate antiporter activity
Csf2rb	357.490289	97.37626259	617.6043155	6.342452453	2.665040799	2.26E-07	6.57E-05	1.69242209	10.23063831	171081	colony stimulating factor 2 receptor subunit beta	GO:0004896,GO:0005886,GO:0016021,GO:0019221,GO:0032496	cytokine receptor activity|plasma membrane|integral component of membrane|cytokine-mediated signaling pathway|response to lipopolysaccharide	rno04060,rno04210,rno04630,rno05200	Cytokine-cytokine receptor interaction|Apoptosis|JAK-STAT signaling pathway|Pathways in cancer
Acp5	231.8455229	63.24437673	400.4466691	6.331735559	2.662601003	8.06E-06	0.001432729	1.664725983	10.04621232	25732	acid phosphatase 5, tartrate resistant	GO:0001503,GO:0003993,GO:0005615,GO:0005764,GO:0007162,GO:0008198,GO:0008199,GO:0010043,GO:0014070,GO:0016021,GO:0016311,GO:0016787,GO:0030316,GO:0030335,GO:0032496,GO:0032691,GO:0032695,GO:0032720,GO:0032929,GO:0033555,GO:0033591,GO:0034097,GO:0045019,GO:0045453,GO:0050728,GO:0050830,GO:0060349,GO:0070723	ossification|acid phosphatase activity|extracellular space|lysosome|negative regulation of cell adhesion|ferrous iron binding|ferric iron binding|response to zinc ion|response to organic cyclic compound|integral component of membrane|dephosphorylation|hydrolase activity|osteoclast differentiation|positive regulation of cell migration|response to lipopolysaccharide|negative regulation of interleuk…	rno00740,rno04142,rno04380,rno05323	Riboflavin metabolism|Lysosome|Osteoclast differentiation|Rheumatoid arthritis
Ptgs2	69.80307802	19.07370092	120.5324551	6.319300886	2.65976496	0.002412926	0.1400382	0.591960807	3.565322447	29527	prostaglandin-endoperoxide synthase 2	GO:0001516,GO:0001525,GO:0004601,GO:0004666,GO:0005515,GO:0005634,GO:0005637,GO:0005640,GO:0005737,GO:0005783,GO:0005789,GO:0005901,GO:0006954,GO:0006979,GO:0007566,GO:0007568,GO:0007612,GO:0007613,GO:0008217,GO:0008284,GO:0008285,GO:0009314,GO:0009750,GO:0010033,GO:0010042,GO:0010226,GO:0010243,GO:0010575,GO:0010942,GO:0014070,GO:0016702,GO:0019233,GO:0019371,GO:0019899,GO:0020037,GO:0030728,GO:…	prostaglandin biosynthetic process|angiogenesis|peroxidase activity|prostaglandin-endoperoxide synthase activity|protein binding|nucleus|nuclear inner membrane|nuclear outer membrane|cytoplasm|endoplasmic reticulum|endoplasmic reticulum membrane|caveola|inflammatory response|response to oxidative stress|embryo implantation|aging|learning|memory|regulation of blood pressure|positive regulation of …	rno00590,rno04064,rno04370,rno04625,rno04657,rno04668,rno04723,rno04726,rno04913,rno04921,rno04923,rno05010,rno05022,rno05140,rno05163,rno05165,rno05167,rno05200,rno05204,rno05206,rno05222	Arachidonic acid metabolism|NF-kappa B signaling pathway|VEGF signaling pathway|C-type lectin receptor signaling pathway|IL-17 signaling pathway|TNF signaling pathway|Retrograde endocannabinoid signaling|Serotonergic synapse|Ovarian steroidogenesis|Oxytocin signaling pathway|Regulation of lipolysis in adipocytes|Alzheimer disease|Pathways of neurodegeneration - multiple diseases|Leishmaniasis|Hum…
LOC102546864	69.30501002	19.07370092	119.5363191	6.267075259	2.647792318	0.002562208	0.145096782	0.638768647	3.815446139	102546864		GO:0016021	integral component of membrane
RT1-DMb	488.6292891	135.5236644	841.7349138	6.210981067	2.63482117	1.32E-08	5.73E-06	5.904066296	34.95008664	294273	RT1 class II, locus DMb	GO:0002250,GO:0002399,GO:0002503,GO:0005764,GO:0005765,GO:0005770,GO:0005771,GO:0010008,GO:0016021,GO:0019882,GO:0019886,GO:0023026,GO:0031902,GO:0042102,GO:0042613,GO:0043231,GO:0051085,GO:2001190	adaptive immune response|MHC class II protein complex assembly|peptide antigen assembly with MHC class II protein complex|lysosome|lysosomal membrane|late endosome|multivesicular body|endosome membrane|integral component of membrane|antigen processing and presentation|antigen processing and presentation of exogenous peptide antigen via MHC class II|MHC class II protein complex binding|late endoso…	rno04145,rno04514,rno04612,rno04640,rno04658,rno04659,rno04672,rno04940,rno05140,rno05145,rno05150,rno05152,rno05164,rno05166,rno05168,rno05169,rno05310,rno05320,rno05321,rno05322,rno05323,rno05330,rno05332,rno05416	Phagosome|Cell adhesion molecules|Antigen processing and presentation|Hematopoietic cell lineage|Th1 and Th2 cell differentiation|Th17 cell differentiation|Intestinal immune network for IgA production|Type I diabetes mellitus|Leishmaniasis|Toxoplasmosis|Staphylococcus aureus infection|Tuberculosis|Influenza A|Human T-cell leukemia virus 1 infection|Herpes simplex virus 1 infection|Epstein-Barr vi…
Ppm1j	14.4594579	4.015515983	24.90339982	6.201793225	2.632685426	0.053745712	1	0.124144533	0.733806761	295341	protein phosphatase, Mg2+/Mn2+ dependent, 1J	GO:0004722,GO:0006470,GO:0106306,GO:0106307	protein serine/threonine phosphatase activity|protein dephosphorylation|protein serine phosphatase activity|protein threonine phosphatase activity
Tnfrsf26	14.4594579	4.015515983	24.90339982	6.201793225	2.632685426	0.053745712	1	0.080323629	0.474785482	361685	tumor necrosis factor receptor superfamily, member 26	GO:0005886,GO:0009986,GO:0016021,GO:0036462,GO:0043065	plasma membrane|cell surface|integral component of membrane|TRAIL-activated apoptotic signaling pathway|positive regulation of apoptotic process
Hvcn1	388.4130913	108.4189315	668.4072511	6.165041858	2.62411069	1.50E-07	4.67E-05	4.235205393	24.88555509	304485		GO:0005887,GO:0009268,GO:0010043,GO:0016021,GO:0016324,GO:0022843,GO:0030171,GO:0032930,GO:0042802,GO:0051453,GO:0071294,GO:0071467,GO:1902600	integral component of plasma membrane|response to pH|response to zinc ion|integral component of membrane|apical plasma membrane|voltage-gated cation channel activity|voltage-gated proton channel activity|positive regulation of superoxide anion generation|identical protein binding|regulation of intracellular pH|cellular response to zinc ion|cellular response to pH|proton transmembrane transport
Cd68	2112.590543	590.2808495	3634.900237	6.157916593	2.622442327	2.14E-14	2.67E-11	27.70843914	162.6232701	287435	Cd68 molecule	GO:0002437,GO:0002605,GO:0005764,GO:0005765,GO:0005886,GO:0007568,GO:0016021,GO:0031669,GO:0031902,GO:0035425,GO:0071222,GO:0071310,GO:0072594,GO:0140052	inflammatory response to antigenic stimulus|negative regulation of dendritic cell antigen processing and presentation|lysosome|lysosomal membrane|plasma membrane|aging|integral component of membrane|cellular response to nutrient levels|late endosome membrane|autocrine signaling|cellular response to lipopolysaccharide|cellular response to organic substance|establishment of protein localization to …	rno04142	Lysosome
Tnfsf15	17.94980538	5.019394979	30.88021577	6.152178879	2.621097451	0.040107072	0.855764992	0.372515382	2.184288456	252878	TNF superfamily member 15	GO:0001819,GO:0005123,GO:0005125,GO:0005164,GO:0005576,GO:0005615,GO:0005886,GO:0006915,GO:0006919,GO:0006955,GO:0007165,GO:0007250,GO:0016021	positive regulation of cytokine production|death receptor binding|cytokine activity|tumor necrosis factor receptor binding|extracellular region|extracellular space|plasma membrane|apoptotic process|activation of cysteine-type endopeptidase activity involved in apoptotic process|immune response|signal transduction|activation of NF-kappaB-inducing kinase activity|integral component of membrane	rno04060	Cytokine-cytokine receptor interaction
Vax2	17.94980538	5.019394979	30.88021577	6.152178879	2.621097451	0.040107072	0.855764992	0.228753378	1.341322765	64572	ventral anterior homeobox 2	GO:0000122,GO:0000978,GO:0000981,GO:0001162,GO:0001227,GO:0005634,GO:0005737,GO:0006357,GO:0007409,GO:0007417,GO:0007601,GO:0009950,GO:0016055,GO:0030182,GO:0030900,GO:0031490,GO:0043010,GO:0048048,GO:0060041,GO:1990837	negative regulation of transcription by RNA polymerase II|RNA polymerase II cis-regulatory region sequence-specific DNA binding|DNA-binding transcription factor activity, RNA polymerase II-specific|RNA polymerase II intronic transcription regulatory region sequence-specific DNA binding|DNA-binding transcription repressor activity, RNA polymerase II-specific|nucleus|cytoplasm|regulation of transcr…			Homeobox
Pla2r1	46.37065318	13.05042694	79.69087942	6.106381021	2.610317613	0.008118338	0.338154025	0.122847904	0.714971079	295631	phospholipase A2 receptor 1	GO:0001819,GO:0005576,GO:0005886,GO:0006898,GO:0009986,GO:0016021,GO:0030246,GO:0038023,GO:0043235,GO:0043274,GO:0043517,GO:0072593,GO:0090238,GO:0090399,GO:0090403,GO:1900138,GO:1900139,GO:1904635	positive regulation of cytokine production|extracellular region|plasma membrane|receptor-mediated endocytosis|cell surface|integral component of membrane|carbohydrate binding|signaling receptor activity|receptor complex|phospholipase binding|positive regulation of DNA damage response, signal transduction by p53 class mediator|reactive oxygen species metabolic process|positive regulation of arachi…	rno04145,rno05152	Phagosome|Tuberculosis
Igf1	549.4787577	157.6090023	941.3485131	5.972682392	2.578379006	7.22E-09	3.31E-06	0.948404026	5.398829793	24482	insulin-like growth factor 1	GO:0000187,GO:0001649,GO:0001666,GO:0001775,GO:0001932,GO:0001974,GO:0002683,GO:0003230,GO:0005158,GO:0005159,GO:0005178,GO:0005179,GO:0005496,GO:0005614,GO:0005615,GO:0005737,GO:0005886,GO:0006417,GO:0007165,GO:0007399,GO:0007565,GO:0007568,GO:0007584,GO:0007613,GO:0007623,GO:0008083,GO:0008283,GO:0008284,GO:0008285,GO:0009408,GO:0009612,GO:0010001,GO:0010033,GO:0010468,GO:0010560,GO:0010613,GO:…	activation of MAPK activity|osteoblast differentiation|response to hypoxia|cell activation|regulation of protein phosphorylation|blood vessel remodeling|negative regulation of immune system process|cardiac atrium development|insulin receptor binding|insulin-like growth factor receptor binding|integrin binding|hormone activity|steroid binding|interstitial matrix|extracellular space|cytoplasm|plasm…	rno01521,rno01522,rno04010,rno04014,rno04015,rno04066,rno04068,rno04114,rno04115,rno04150,rno04151,rno04152,rno04211,rno04213,rno04510,rno04550,rno04730,rno04750,rno04913,rno04914,rno04935,rno04960,rno05200,rno05202,rno05205,rno05214,rno05215,rno05218,rno05224,rno05410,rno05414	EGFR tyrosine kinase inhibitor resistance|Endocrine resistance|MAPK signaling pathway|Ras signaling pathway|Rap1 signaling pathway|HIF-1 signaling pathway|FoxO signaling pathway|Oocyte meiosis|p53 signaling pathway|mTOR signaling pathway|PI3K-Akt signaling pathway|AMPK signaling pathway|Longevity regulating pathway|Longevity regulating pathway - multiple species|Focal adhesion|Signaling pathways …
C1ql2	17.45173738	5.019394979	29.88407978	5.953721496	2.573791737	0.044902881	0.901734787	0.296683289	1.683520568	288979	complement C1q like 2	GO:0005576,GO:0032991,GO:0042802	extracellular region|protein-containing complex|identical protein binding
Clca4l	3.490347476	1.003878996	5.976815956	5.953721496	2.573791737	0.3171894	1	0.01175142	0.066683088	499721	chloride channel calcium activated 4-like	GO:0005229,GO:0005887,GO:0006508,GO:0006821,GO:0008237,GO:0046872	intracellular calcium activated chloride channel activity|integral component of plasma membrane|proteolysis|chloride transport|metallopeptidase activity|metal ion binding	rno04924,rno04972	Renin secretion|Pancreatic secretion
Ffar2	3.490347476	1.003878996	5.976815956	5.953721496	2.573791737	0.3171894	1	0.02398127	0.136081009	292794	free fatty acid receptor 2	GO:0002232,GO:0002385,GO:0002673,GO:0002720,GO:0002752,GO:0002879,GO:0004930,GO:0005886,GO:0007186,GO:0008289,GO:0016021,GO:0019915,GO:0032722,GO:0032757,GO:0042593,GO:0042995,GO:0045444,GO:0071398,GO:0090276	leukocyte chemotaxis involved in inflammatory response|mucosal immune response|regulation of acute inflammatory response|positive regulation of cytokine production involved in immune response|cell surface pattern recognition receptor signaling pathway|positive regulation of acute inflammatory response to non-antigenic stimulus|G protein-coupled receptor activity|plasma membrane|G protein-coupled …	rno04024	cAMP signaling pathway
LOC108348453	6.980694952	2.007757992	11.95363191	5.953721496	2.573791737	0.152992937	1	0.109165705	0.619457568	108348453	calsequestrin-1-like	GO:0000398,GO:0005634	mRNA splicing, via spliceosome|nucleus
LOC120095953	3.490347476	1.003878996	5.976815956	5.953721496	2.573791737	0.3171894	1	0.008964463	0.050868583	120095953
LOC120098765	6.980694952	2.007757992	11.95363191	5.953721496	2.573791737	0.152992937	1	0.018159228	0.103044001	120098765
Ms4a6c	157.0656364	45.17455481	268.956718	5.953721496	2.573791737	0.000135927	0.015569887	0.968653435	5.496595322	690930
Ncr3	3.490347476	1.003878996	5.976815956	5.953721496	2.573791737	0.3171894	1	0.028344779	0.160841614	294251	natural cytotoxicity triggering receptor 3	GO:0002429,GO:0005886,GO:0016021,GO:0030101,GO:0042802,GO:0045954	immune response-activating cell surface receptor signaling pathway|plasma membrane|integral component of membrane|natural killer cell activation|identical protein binding|positive regulation of natural killer cell mediated cytotoxicity	rno04650	Natural killer cell mediated cytotoxicity
Pla1a	3.490347476	1.003878996	5.976815956	5.953721496	2.573791737	0.3171894	1	0.026991807	0.15316421	85311	phospholipase A1 member A	GO:0002080,GO:0004806,GO:0005615,GO:0008970,GO:0016042,GO:0016298	acrosomal membrane|triglyceride lipase activity|extracellular space|phospholipase A1 activity|lipid catabolic process|lipase activity	rno00564,rno04014	Glycerophospholipid metabolism|Ras signaling pathway
Ppp3r2	3.490347476	1.003878996	5.976815956	5.953721496	2.573791737	0.3171894	1	0.076519398	0.434207064	29749	protein phosphatase 3, regulatory subunit B, beta	GO:0005509,GO:0005515,GO:0005829,GO:0008597,GO:0043666	calcium ion binding|protein binding|cytosol|calcium-dependent protein serine/threonine phosphatase regulator activity|regulation of phosphoprotein phosphatase activity	rno04010,rno04020,rno04022,rno04114,rno04218,rno04310,rno04360,rno04370,rno04380,rno04625,rno04650,rno04658,rno04659,rno04660,rno04662,rno04720,rno04724,rno04921,rno04922,rno04924,rno05010,rno05014,rno05020,rno05022,rno05031,rno05152,rno05163,rno05166,rno05167,rno05170,rno05235,rno05417	MAPK signaling pathway|Calcium signaling pathway|cGMP-PKG signaling pathway|Oocyte meiosis|Cellular senescence|Wnt signaling pathway|Axon guidance|VEGF signaling pathway|Osteoclast differentiation|C-type lectin receptor signaling pathway|Natural killer cell mediated cytotoxicity|Th1 and Th2 cell differentiation|Th17 cell differentiation|T cell receptor signaling pathway|B cell receptor signaling …
Procr	17.45173738	5.019394979	29.88407978	5.953721496	2.573791737	0.044902881	0.901734787	0.20488346	1.162605146	362248	protein C receptor	GO:0005615,GO:0005813,GO:0007596,GO:0016021,GO:0038023,GO:0048471,GO:0050819	extracellular space|centrosome|blood coagulation|integral component of membrane|signaling receptor activity|perinuclear region of cytoplasm|negative regulation of coagulation	rno04610	Complement and coagulation cascades
Rhox5	6.980694952	2.007757992	11.95363191	5.953721496	2.573791737	0.152992937	1	0.100440204	0.569944974	24631	Rhox homeobox family member 5	GO:0000981,GO:0003677,GO:0005634,GO:0006357,GO:0030154	DNA-binding transcription factor activity, RNA polymerase II-specific|DNA binding|nucleus|regulation of transcription by RNA polymerase II|cell differentiation
Slc17a3	6.980694952	2.007757992	11.95363191	5.953721496	2.573791737	0.152992937	1	0.018589032	0.105482913	266730	solute carrier family 17 member 3	GO:0005436,GO:0005737,GO:0005764,GO:0005789,GO:0005887,GO:0006814,GO:0006817,GO:0006820,GO:0008308,GO:0008514,GO:0015136,GO:0015143,GO:0015562,GO:0015711,GO:0015739,GO:0015747,GO:0016021,GO:0016324,GO:0019534,GO:0022857,GO:0035725,GO:0042910,GO:0046415,GO:0048471,GO:1901998,GO:1990961	sodium:phosphate symporter activity|cytoplasm|lysosome|endoplasmic reticulum membrane|integral component of plasma membrane|sodium ion transport|phosphate ion transport|anion transport|voltage-gated anion channel activity|organic anion transmembrane transporter activity|sialic acid transmembrane transporter activity|urate transmembrane transporter activity|efflux transmembrane transporter activit…
Slc30a2	3.490347476	1.003878996	5.976815956	5.953721496	2.573791737	0.3171894	1	0.017945997	0.101834027	25362	solute carrier family 30 member 2	GO:0005385,GO:0005737,GO:0005770,GO:0005886,GO:0006829,GO:0008324,GO:0010008,GO:0010043,GO:0016021,GO:0031410,GO:0042802,GO:0043231,GO:0061088,GO:0061090,GO:0071577,GO:0098655	zinc ion transmembrane transporter activity|cytoplasm|late endosome|plasma membrane|zinc ion transport|cation transmembrane transporter activity|endosome membrane|response to zinc ion|integral component of membrane|cytoplasmic vesicle|identical protein binding|intracellular membrane-bounded organelle|regulation of sequestering of zinc ion|positive regulation of sequestering of zinc ion|zinc ion t…
Spata25	3.490347476	1.003878996	5.976815956	5.953721496	2.573791737	0.3171894	1	0.035654373	0.202319685	499943	spermatogenesis associated 25	GO:0007283	spermatogenesis
Tmem171	17.45173738	5.019394979	29.88407978	5.953721496	2.573791737	0.044902881	0.901734787	0.204291311	1.159245015	293634	transmembrane protein 171	GO:0016021	integral component of membrane
Tnfsf10	3.490347476	1.003878996	5.976815956	5.953721496	2.573791737	0.3171894	1	0.037251538	0.211382754	246775	TNF superfamily member 10	GO:0005125,GO:0005164,GO:0005615,GO:0006955,GO:0007165,GO:0008270,GO:0008584,GO:0016021,GO:0032813,GO:0032868,GO:0042802,GO:0043065,GO:0043123,GO:0043280,GO:0045569,GO:0090200,GO:2001238	cytokine activity|tumor necrosis factor receptor binding|extracellular space|immune response|signal transduction|zinc ion binding|male gonad development|integral component of membrane|tumor necrosis factor receptor superfamily binding|response to insulin|identical protein binding|positive regulation of apoptotic process|positive regulation of I-kappaB kinase/NF-kappaB signaling|positive regulatio…	rno04060,rno04061,rno04068,rno04210,rno04217,rno04650,rno05132,rno05164,rno05417	Cytokine-cytokine receptor interaction|Viral protein interaction with cytokine and cytokine receptor|FoxO signaling pathway|Apoptosis|Necroptosis|Natural killer cell mediated cytotoxicity|Salmonella infection|Influenza A|Lipid and atherosclerosis
Tnfsf4	3.490347476	1.003878996	5.976815956	5.953721496	2.573791737	0.3171894	1	0.031714994	0.179965799	89814	TNF superfamily member 4	GO:0001818,GO:0001819,GO:0002215,GO:0002526,GO:0002639,GO:0002726,GO:0002819,GO:0002830,GO:0002891,GO:0005125,GO:0005164,GO:0005615,GO:0006954,GO:0007165,GO:0008203,GO:0009615,GO:0009986,GO:0016021,GO:0032689,GO:0032700,GO:0032722,GO:0032729,GO:0032733,GO:0032735,GO:0032736,GO:0032743,GO:0032753,GO:0032755,GO:0032813,GO:0035709,GO:0035712,GO:0035713,GO:0035714,GO:0035783,GO:0042098,GO:0042102,GO:…	negative regulation of cytokine production|positive regulation of cytokine production|defense response to nematode|acute inflammatory response|positive regulation of immunoglobulin production|positive regulation of T cell cytokine production|regulation of adaptive immune response|positive regulation of type 2 immune response|positive regulation of immunoglobulin mediated immune response|cytokine …	rno04060	Cytokine-cytokine receptor interaction
Trmt2b	3.490347476	1.003878996	5.976815956	5.953721496	2.573791737	0.3171894	1	0.018401508	0.104418816	503462
Trpc2	3.490347476	1.003878996	5.976815956	5.953721496	2.573791737	0.3171894	1	0.01744765	0.099006177	64573	transient receptor potential cation channel subfamily C member 2	GO:0000012,GO:0000139,GO:0002121,GO:0002124,GO:0003684,GO:0005262,GO:0005516,GO:0005635,GO:0005789,GO:0005886,GO:0005887,GO:0006816,GO:0006828,GO:0007204,GO:0007338,GO:0007340,GO:0008050,GO:0010468,GO:0012505,GO:0015279,GO:0016021,GO:0019236,GO:0019992,GO:0032590,GO:0034703,GO:0048047,GO:0051480,GO:0070588,GO:0070679,GO:1902436	single strand break repair|Golgi membrane|inter-male aggressive behavior|territorial aggressive behavior|damaged DNA binding|calcium channel activity|calmodulin binding|nuclear envelope|endoplasmic reticulum membrane|plasma membrane|integral component of plasma membrane|calcium ion transport|manganese ion transport|positive regulation of cytosolic calcium ion concentration|single fertilization|ac…
Vtcn1	3.490347476	1.003878996	5.976815956	5.953721496	2.573791737	0.3171894	1	0.021591384	0.122519672	295322	V-set domain containing T cell activation inhibitor 1	GO:0001562,GO:0001817,GO:0002250,GO:0005102,GO:0009897,GO:0031225,GO:0032743,GO:0042102,GO:0042130,GO:0043066,GO:0050852,GO:0050868	response to protozoan|regulation of cytokine production|adaptive immune response|signaling receptor binding|external side of plasma membrane|anchored component of membrane|positive regulation of interleukin-2 production|positive regulation of T cell proliferation|negative regulation of T cell proliferation|negative regulation of apoptotic process|T cell receptor signaling pathway|negative regulat…	rno04514	Cell adhesion molecules
Rasl12	69.30888152	20.07757992	118.5401831	5.90410715	2.561718904	0.003365672	0.180306838	0.430512638	2.422573494	315762	RAS-like, family 12	GO:0003924,GO:0005525,GO:0005886,GO:0007165,GO:0019003	GTPase activity|GTP binding|plasma membrane|signal transduction|GDP binding
Bcl2a1	349.0386191	101.3917786	596.6854596	5.884949135	2.557029946	7.32E-07	0.000184607	8.170717214	45.82893017	170929	BCL2-related protein A1	GO:0005741,GO:0006915,GO:0007568,GO:0008630,GO:0021987,GO:0042803,GO:0043066,GO:0044877,GO:0046982,GO:0051400,GO:0097192	mitochondrial outer membrane|apoptotic process|aging|intrinsic apoptotic signaling pathway in response to DNA damage|cerebral cortex development|protein homodimerization activity|negative regulation of apoptotic process|protein-containing complex binding|protein heterodimerization activity|BH domain binding|extrinsic apoptotic signaling pathway in absence of ligand	rno04064,rno04210,rno05202,rno05221	NF-kappa B signaling pathway|Apoptosis|Transcriptional misregulation in cancer|Acute myeloid leukemia
Moxd1	44.87644919	13.05042694	76.70247144	5.877391733	2.555176058	0.010002109	0.381065041	0.181825836	1.018537578	294119		GO:0004500,GO:0005507,GO:0005615,GO:0005789,GO:0006589,GO:0030667,GO:0042420,GO:0042421	dopamine beta-monooxygenase activity|copper ion binding|extracellular space|endoplasmic reticulum membrane|octopamine biosynthetic process|secretory granule membrane|dopamine catabolic process|norepinephrine biosynthetic process
Havcr2	79.28185596	23.0892169	135.474495	5.867435677	2.552730121	0.002315887	0.136222636	0.234850163	1.313336546	363578	hepatitis A virus cellular receptor 2	GO:0001772,GO:0001819,GO:0002250,GO:0002281,GO:0002519,GO:0002652,GO:0002826,GO:0002838,GO:0002859,GO:0005769,GO:0006954,GO:0009986,GO:0010629,GO:0016021,GO:0030054,GO:0030886,GO:0032088,GO:0032480,GO:0032687,GO:0032689,GO:0032703,GO:0032712,GO:0032715,GO:0032720,GO:0032722,GO:0032729,GO:0032732,GO:0032753,GO:0032760,GO:0032815,GO:0034138,GO:0034154,GO:0034162,GO:0042102,GO:0042130,GO:0043032,GO:…	immunological synapse|positive regulation of cytokine production|adaptive immune response|macrophage activation involved in immune response|natural killer cell tolerance induction|regulation of tolerance induction dependent upon immune response|negative regulation of T-helper 1 type immune response|negative regulation of immune response to tumor cell|negative regulation of natural killer cell med…
Cd84	209.4247201	61.23661874	357.6128214	5.839852505	2.545931932	3.30E-05	0.004912631	1.322629576	7.361679977	501872	CD84 molecule	GO:0005886,GO:0016021,GO:0031664,GO:0032685,GO:0032693,GO:0032701,GO:0032715,GO:0032760,GO:0033004,GO:0042802,GO:0043030,GO:0043231,GO:0043305,GO:0043410,GO:0051092,GO:0071639,GO:2001256	plasma membrane|integral component of membrane|regulation of lipopolysaccharide-mediated signaling pathway|negative regulation of granulocyte macrophage colony-stimulating factor production|negative regulation of interleukin-10 production|negative regulation of interleukin-18 production|negative regulation of interleukin-6 production|positive regulation of tumor necrosis factor production|negativ…
Trpv2	611.3243623	179.6943402	1042.954384	5.804046933	2.537059185	3.88E-09	1.89E-06	3.447568958	19.07131779	29465	transient receptor potential cation channel, subfamily V, member 2	GO:0005216,GO:0005261,GO:0005262,GO:0005515,GO:0005737,GO:0005886,GO:0005887,GO:0006915,GO:0008285,GO:0009266,GO:0009408,GO:0009986,GO:0012505,GO:0016021,GO:0030027,GO:0030424,GO:0032584,GO:0042470,GO:0042802,GO:0044295,GO:0044297,GO:0045773,GO:0070588,GO:0090280,GO:0098703,GO:0120162	ion channel activity|cation channel activity|calcium channel activity|protein binding|cytoplasm|plasma membrane|integral component of plasma membrane|apoptotic process|negative regulation of cell population proliferation|response to temperature stimulus|response to heat|cell surface|endomembrane system|integral component of membrane|lamellipodium|axon|growth cone membrane|melanosome|identical pro…	rno04621,rno04750	NOD-like receptor signaling pathway|Inflammatory mediator regulation of TRP channels
Plvap	16.95366938	5.019394979	28.88794379	5.755264113	2.524882136	0.050334512	0.968369271	0.145292485	0.796975984	56765	plasmalemma vesicle associated protein	GO:0000165,GO:0002693,GO:0005901,GO:0009986,GO:0016021,GO:0032502,GO:0033209,GO:0042802,GO:0048471,GO:0070528	MAPK cascade|positive regulation of cellular extravasation|caveola|cell surface|integral component of membrane|developmental process|tumor necrosis factor-mediated signaling pathway|identical protein binding|perinuclear region of cytoplasm|protein kinase C signaling
Tie1	16.95366938	5.019394979	28.88794379	5.755264113	2.524882136	0.050334512	0.968369271	0.07399612	0.405892506	89806	tyrosine kinase with immunoglobulin-like and EGF-like domains 1	GO:0001525,GO:0001568,GO:0001570,GO:0001701,GO:0001936,GO:0003180,GO:0004714,GO:0005524,GO:0005886,GO:0005887,GO:0007169,GO:0007275,GO:0016525,GO:0018108,GO:0030336,GO:0032526,GO:0033674,GO:0043235,GO:0045026,GO:0045766,GO:0048771,GO:0060836,GO:0060854,GO:1901201	angiogenesis|blood vessel development|vasculogenesis|in utero embryonic development|regulation of endothelial cell proliferation|aortic valve morphogenesis|transmembrane receptor protein tyrosine kinase activity|ATP binding|plasma membrane|integral component of plasma membrane|transmembrane receptor protein tyrosine kinase signaling pathway|multicellular organism development|negative regulation o…
Rgs1	343.0656746	102.3956576	583.7356917	5.700785615	2.511160748	1.26E-06	0.000284417	4.396249365	23.88657341	54289	regulator of G-protein signaling 1	GO:0001965,GO:0005096,GO:0005829,GO:0007165,GO:0007186,GO:0008277,GO:0009617,GO:0009968,GO:0031234,GO:0043547,GO:0061737	G-protein alpha-subunit binding|GTPase activator activity|cytosol|signal transduction|G protein-coupled receptor signaling pathway|regulation of G protein-coupled receptor signaling pathway|response to bacterium|negative regulation of signal transduction|extrinsic component of cytoplasmic side of plasma membrane|positive regulation of GTPase activity|leukotriene signaling pathway
Tm4sf19	110.6988547	33.12800686	188.2697026	5.683097791	2.506677541	0.000865599	0.067599379	0.741095534	4.014173605	288044	transmembrane 4 L six family member 19	GO:0016021	integral component of membrane
Aldh1a3	60.33591459	18.06982192	102.6020072	5.678086241	2.505404762	0.005791932	0.2660774	0.281643893	1.524190144	266603	aldehyde dehydrogenase 1 family, member A3	GO:0001758,GO:0001822,GO:0002072,GO:0002138,GO:0004029,GO:0004030,GO:0005737,GO:0005829,GO:0007626,GO:0021768,GO:0021983,GO:0031076,GO:0042472,GO:0042493,GO:0042572,GO:0042573,GO:0042574,GO:0042803,GO:0043065,GO:0043584,GO:0048048,GO:0050885,GO:0051289,GO:0060013,GO:0060166,GO:0060324,GO:0070324,GO:0070384,GO:0070403	retinal dehydrogenase activity|kidney development|optic cup morphogenesis involved in camera-type eye development|retinoic acid biosynthetic process|aldehyde dehydrogenase (NAD+) activity|aldehyde dehydrogenase [NAD(P)+] activity|cytoplasm|cytosol|locomotory behavior|nucleus accumbens development|pituitary gland development|embryonic camera-type eye development|inner ear morphogenesis|response to…	rno00830	Retinol metabolism
Anxa3	470.2356168	144.5585754	795.9126582	5.505814207	2.460955927	1.24E-07	3.99E-05	2.134439905	11.20062635	25291	annexin A3	GO:0004859,GO:0005509,GO:0005544,GO:0005737,GO:0005886,GO:0006909,GO:0010595,GO:0016020,GO:0019834,GO:0021766,GO:0030424,GO:0030425,GO:0030670,GO:0031100,GO:0042581,GO:0042742,GO:0043025,GO:0043086,GO:0043312,GO:0045766,GO:0048306,GO:0051054,GO:0051091,GO:0051384,GO:0070848	phospholipase inhibitor activity|calcium ion binding|calcium-dependent phospholipid binding|cytoplasm|plasma membrane|phagocytosis|positive regulation of endothelial cell migration|membrane|phospholipase A2 inhibitor activity|hippocampus development|axon|dendrite|phagocytic vesicle membrane|animal organ regeneration|specific granule|defense response to bacterium|neuronal cell body|negative regula…
Apobec3	35.90348225	11.04266895	60.76429556	5.502681989	2.460134955	0.018943143	0.570148388	0.348278939	1.826578969	315137	apolipoprotein B mRNA editing enzyme catalytic subunit 3	GO:0000932,GO:0002244,GO:0003723,GO:0004126,GO:0005634,GO:0005654,GO:0005737,GO:0005829,GO:0008270,GO:0009972,GO:0010529,GO:0016554,GO:0016787,GO:0045071,GO:0045087,GO:0045869,GO:0047844,GO:0048525,GO:0050688,GO:0051607,GO:0070383,GO:0080111,GO:1903900	P-body|hematopoietic progenitor cell differentiation|RNA binding|cytidine deaminase activity|nucleus|nucleoplasm|cytoplasm|cytosol|zinc ion binding|cytidine deamination|negative regulation of transposition|cytidine to uridine editing|hydrolase activity|negative regulation of viral genome replication|innate immune response|negative regulation of single stranded viral RNA replication via double str…	rno05170	Human immunodeficiency virus 1 infection
Cd93	55.35136312	17.06594293	93.63678331	5.486762947	2.455955246	0.008188444	0.338767266	0.153270599	0.80151541	84398	CD93 molecule	GO:0001849,GO:0005509,GO:0005886,GO:0009986,GO:0016021,GO:0030246,GO:0031410,GO:0098609	complement component C1q complex binding|calcium ion binding|plasma membrane|cell surface|integral component of membrane|carbohydrate binding|cytoplasmic vesicle|cell-cell adhesion
Gdnf	19.44788087	6.023273975	32.87248776	5.457578038	2.448260854	0.047246808	0.930559018	0.059119535	0.30751605	25453	glial cell derived neurotrophic factor	GO:0001656,GO:0001657,GO:0001658,GO:0001755,GO:0001759,GO:0001941,GO:0003337,GO:0005576,GO:0005615,GO:0005794,GO:0007165,GO:0007399,GO:0007422,GO:0008083,GO:0008283,GO:0008284,GO:0008584,GO:0009611,GO:0010468,GO:0021516,GO:0021784,GO:0030116,GO:0030182,GO:0030432,GO:0030901,GO:0030971,GO:0031175,GO:0032770,GO:0042803,GO:0043235,GO:0043524,GO:0045597,GO:0045944,GO:0048018,GO:0048255,GO:0048484,GO:…	metanephros development|ureteric bud development|branching involved in ureteric bud morphogenesis|neural crest cell migration|organ induction|postsynaptic membrane organization|mesenchymal to epithelial transition involved in metanephros morphogenesis|extracellular region|extracellular space|Golgi apparatus|signal transduction|nervous system development|peripheral nervous system development|growt…	rno04020	Calcium signaling pathway
LOC108352560	6.482626956	2.007757992	10.95749592	5.457578038	2.448260854	0.1849657	1	0.027232283	0.141651385	108352560
LOC120100585	6.482626956	2.007757992	10.95749592	5.457578038	2.448260854	0.1849657	1	0.362486122	1.885507064	120100585
Olr35	6.482626956	2.007757992	10.95749592	5.457578038	2.448260854	0.1849657	1	0.015450228	0.080365875	293140	olfactory receptor 35	GO:0004930,GO:0004984,GO:0005886,GO:0007186,GO:0016021,GO:0050911,GO:0070374	G protein-coupled receptor activity|olfactory receptor activity|plasma membrane|G protein-coupled receptor signaling pathway|integral component of membrane|detection of chemical stimulus involved in sensory perception of smell|positive regulation of ERK1 and ERK2 cascade	rno04740	Olfactory transduction
Samd13	6.482626956	2.007757992	10.95749592	5.457578038	2.448260854	0.1849657	1	0.057879053	0.301063564	56764	sterile alpha motif domain containing 13
Wdr72	12.96525391	4.015515983	21.91499184	5.457578038	2.448260854	0.079706039	1	0.059665349	0.310355159	300834	WD repeat domain 72	GO:0005634,GO:0005737,GO:0005768,GO:0022617,GO:0070166,GO:0072659	nucleus|cytoplasm|endosome|extracellular matrix disassembly|enamel mineralization|protein localization to plasma membrane
Olr1	273.7684076	85.32971464	462.2071006	5.416719165	2.437419295	1.24E-05	0.002154628	1.22961524	6.348079876	140914	oxidized low density lipoprotein receptor 1	GO:0002376,GO:0005041,GO:0005576,GO:0005654,GO:0005886,GO:0006897,GO:0006954,GO:0007159,GO:0008219,GO:0010629,GO:0016021,GO:0030246,GO:0032930,GO:0042157,GO:0042310,GO:0042542,GO:0042802,GO:0043231,GO:0043235,GO:0045121	immune system process|low-density lipoprotein particle receptor activity|extracellular region|nucleoplasm|plasma membrane|endocytosis|inflammatory response|leukocyte cell-cell adhesion|cell death|negative regulation of gene expression|integral component of membrane|carbohydrate binding|positive regulation of superoxide anion generation|lipoprotein metabolic process|vasoconstriction|response to hy…	rno03320,rno04145,rno05417	PPAR signaling pathway|Phagosome|Lipid and atherosclerosis
Pf4	77.29345547	24.0930959	130.493815	5.41623275	2.437289737	0.003684651	0.190932907	4.26776113	22.03100192	360918	platelet factor 4	GO:0005615,GO:0005737,GO:0006954,GO:0006955,GO:0007189,GO:0008009,GO:0008201,GO:0010628,GO:0010744,GO:0016525,GO:0019221,GO:0020005,GO:0030168,GO:0030593,GO:0030595,GO:0031091,GO:0031640,GO:0031982,GO:0032760,GO:0032991,GO:0042127,GO:0042832,GO:0045236,GO:0045347,GO:0045651,GO:0045653,GO:0045944,GO:0048248,GO:0051873,GO:0061844,GO:0065003,GO:0070098,GO:0071222,GO:2001240	extracellular space|cytoplasm|inflammatory response|immune response|adenylate cyclase-activating G protein-coupled receptor signaling pathway|chemokine activity|heparin binding|positive regulation of gene expression|positive regulation of macrophage derived foam cell differentiation|negative regulation of angiogenesis|cytokine-mediated signaling pathway|symbiont-containing vacuole membrane|platel…	rno04060,rno04061,rno04062	Cytokine-cytokine receptor interaction|Viral protein interaction with cytokine and cytokine receptor|Chemokine signaling pathway
Tlr5	260.3050857	81.31419866	439.2959728	5.402450987	2.433614078	1.78E-05	0.002849826	0.796309915	4.100244783	289337	toll-like receptor 5	GO:0002224,GO:0002755,GO:0004888,GO:0005149,GO:0005887,GO:0006954,GO:0008584,GO:0016020,GO:0032757,GO:0034123,GO:0034146,GO:0038023,GO:0042742,GO:0045087,GO:0045429,GO:0071222,GO:0071260	toll-like receptor signaling pathway|MyD88-dependent toll-like receptor signaling pathway|transmembrane signaling receptor activity|interleukin-1 receptor binding|integral component of plasma membrane|inflammatory response|male gonad development|membrane|positive regulation of interleukin-8 production|positive regulation of toll-like receptor signaling pathway|toll-like receptor 5 signaling pathw…	rno04620,rno05132,rno05134,rno05321	Toll-like receptor signaling pathway|Salmonella infection|Legionellosis|Inflammatory bowel disease
Scn1b	402.4286823	126.4887535	678.368611	5.363074522	2.4230603	7.20E-07	0.000184607	3.506411027	17.92311457	29686	sodium voltage-gated channel beta subunit 1	GO:0001518,GO:0002028,GO:0005244,GO:0005248,GO:0005272,GO:0005515,GO:0005886,GO:0005887,GO:0007411,GO:0010765,GO:0010976,GO:0014704,GO:0017080,GO:0019227,GO:0019871,GO:0021966,GO:0030315,GO:0033268,GO:0034706,GO:0035725,GO:0040011,GO:0043204,GO:0044325,GO:0046684,GO:0051899,GO:0060048,GO:0060307,GO:0060371,GO:0061337,GO:0086002,GO:0086006,GO:0086012,GO:0086047,GO:0086062,GO:0086091,GO:1905150,GO:…	voltage-gated sodium channel complex|regulation of sodium ion transport|voltage-gated ion channel activity|voltage-gated sodium channel activity|sodium channel activity|protein binding|plasma membrane|integral component of plasma membrane|axon guidance|positive regulation of sodium ion transport|positive regulation of neuron projection development|intercalated disc|sodium channel regulator activi…	rno04261	Adrenergic signaling in cardiomyocytes
Rp1l1	31.91506678	10.03878996	53.79134361	5.358349346	2.421788643	0.024814378	0.663660733	0.082323242	0.420426726	683404		GO:0001750,GO:0005930,GO:0032391,GO:0035082,GO:0035556,GO:0042461,GO:0045494,GO:0060041	photoreceptor outer segment|axoneme|photoreceptor connecting cilium|axoneme assembly|intracellular signal transduction|photoreceptor cell development|photoreceptor cell maintenance|retina development in camera-type eye
Il1rn	399.9383423	126.4887535	673.3879311	5.323698057	2.412428749	8.38E-07	0.00020548	3.27738142	16.62942485	60582	interleukin 1 receptor antagonist	GO:0001660,GO:0002437,GO:0002439,GO:0005125,GO:0005149,GO:0005150,GO:0005151,GO:0005152,GO:0005576,GO:0005615,GO:0006629,GO:0006953,GO:0006954,GO:0006955,GO:0007165,GO:0007565,GO:0007613,GO:0009968,GO:0010243,GO:0014050,GO:0014070,GO:0014823,GO:0019233,GO:0019752,GO:0030073,GO:0030336,GO:0031982,GO:0032496,GO:0034115,GO:0042493,GO:0042594,GO:0043066,GO:0043507,GO:0045352,GO:0045353,GO:0045837,GO:…	fever generation|inflammatory response to antigenic stimulus|chronic inflammatory response to antigenic stimulus|cytokine activity|interleukin-1 receptor binding|interleukin-1, type I receptor binding|interleukin-1, type II receptor binding|interleukin-1 receptor antagonist activity|extracellular region|extracellular space|lipid metabolic process|acute-phase response|inflammatory response|immune …	rno04060	Cytokine-cytokine receptor interaction
Hhla1	9.474906435	3.011636987	15.93817588	5.292196885	2.403866735	0.12469797	1	0.032908536	0.165989794	120093074
Trpv4	9.474906435	3.011636987	15.93817588	5.292196885	2.403866735	0.12469797	1	0.052391447	0.264261083	66026	transient receptor potential cation channel, subfamily V, member 4	GO:0000122,GO:0001934,GO:0002024,GO:0002027,GO:0003779,GO:0005034,GO:0005080,GO:0005216,GO:0005261,GO:0005262,GO:0005515,GO:0005516,GO:0005524,GO:0005881,GO:0005886,GO:0005887,GO:0005912,GO:0005925,GO:0005929,GO:0006816,GO:0006874,GO:0006970,GO:0006971,GO:0007015,GO:0007043,GO:0007204,GO:0007231,GO:0008017,GO:0008217,GO:0008289,GO:0009986,GO:0010628,GO:0010759,GO:0010977,GO:0015275,GO:0015867,GO:…	negative regulation of transcription by RNA polymerase II|positive regulation of protein phosphorylation|diet induced thermogenesis|regulation of heart rate|actin binding|osmosensor activity|protein kinase C binding|ion channel activity|cation channel activity|calcium channel activity|protein binding|calmodulin binding|ATP binding|cytoplasmic microtubule|plasma membrane|integral component of plas…	rno04218,rno04750,rno05418	Cellular senescence|Inflammatory mediator regulation of TRP channels|Fluid shear stress and atherosclerosis
Cxcl2	78.29346297	25.09697489	131.489951	5.239274916	2.389367165	0.004165694	0.207908182	1.280521625	6.394328302	114105	C-X-C motif chemokine ligand 2	GO:0001975,GO:0002237,GO:0005615,GO:0006954,GO:0007204,GO:0008009,GO:0009408,GO:0010332,GO:0030593,GO:0030595,GO:0031640,GO:0032355,GO:0042060,GO:0045236,GO:0051384,GO:0061844,GO:0070098,GO:0070997,GO:0071222,GO:0071347	response to amphetamine|response to molecule of bacterial origin|extracellular space|inflammatory response|positive regulation of cytosolic calcium ion concentration|chemokine activity|response to heat|response to gamma radiation|neutrophil chemotaxis|leukocyte chemotaxis|killing of cells of other organism|response to estradiol|wound healing|CXCR chemokine receptor binding|response to glucocortic…	rno04060,rno04061,rno04062,rno04064,rno04621,rno04657,rno04668,rno05134,rno05146,rno05167,rno05323,rno05417	Cytokine-cytokine receptor interaction|Viral protein interaction with cytokine and cytokine receptor|Chemokine signaling pathway|NF-kappa B signaling pathway|NOD-like receptor signaling pathway|IL-17 signaling pathway|TNF signaling pathway|Legionellosis|Amoebiasis|Kaposi sarcoma-associated herpesvirus infection|Rheumatoid arthritis|Lipid and atherosclerosis
Tal1	90.76064888	29.11249088	152.4088069	5.235168902	2.388236083	0.002711596	0.152788326	0.262676152	1.310654336	313507	TAL bHLH transcription factor 1, erythroid differentiation factor	GO:0000122,GO:0000785,GO:0000976,GO:0000978,GO:0000981,GO:0001525,GO:0003677,GO:0003682,GO:0003700,GO:0005634,GO:0005654,GO:0005667,GO:0006357,GO:0006366,GO:0007626,GO:0019899,GO:0021527,GO:0030097,GO:0030099,GO:0030182,GO:0030218,GO:0030219,GO:0030220,GO:0030221,GO:0030297,GO:0031334,GO:0032991,GO:0035162,GO:0035855,GO:0042127,GO:0042826,GO:0043249,GO:0045165,GO:0045637,GO:0045648,GO:0045799,GO:…	negative regulation of transcription by RNA polymerase II|chromatin|transcription cis-regulatory region binding|RNA polymerase II cis-regulatory region sequence-specific DNA binding|DNA-binding transcription factor activity, RNA polymerase II-specific|angiogenesis|DNA binding|chromatin binding|DNA-binding transcription factor activity|nucleus|nucleoplasm|transcription regulator complex|regulation…			bHLH
Ctsz	4326.596094	1389.36853	7263.823659	5.228147537	2.386299854	1.22E-12	1.41E-09	57.75808384	287.8044054	252929	cathepsin Z	GO:0004180,GO:0004197,GO:0005615,GO:0005764,GO:0005783,GO:0006508,GO:0009986,GO:0010757,GO:0010977,GO:0030426,GO:0031410,GO:0032091,GO:0043525,GO:0051603,GO:0060441,GO:0099738,GO:1901214,GO:2000179	carboxypeptidase activity|cysteine-type endopeptidase activity|extracellular space|lysosome|endoplasmic reticulum|proteolysis|cell surface|negative regulation of plasminogen activation|negative regulation of neuron projection development|growth cone|cytoplasmic vesicle|negative regulation of protein binding|positive regulation of neuron apoptotic process|proteolysis involved in cellular protein c…	rno04142,rno04210	Lysosome|Apoptosis
Hsd11b1	236.8765324	76.29480368	397.4582611	5.209506309	2.381146659	4.56E-05	0.006298783	0.903433983	4.485695785	25116	hydroxysteroid 11-beta dehydrogenase 1	GO:0003845,GO:0005496,GO:0005737,GO:0005791,GO:0006704,GO:0006706,GO:0006713,GO:0016491,GO:0030176,GO:0030324,GO:0031667,GO:0031965,GO:0042803,GO:0043231,GO:0043456,GO:0045177,GO:0050661,GO:0070524,GO:0071392	11-beta-hydroxysteroid dehydrogenase [NAD(P)] activity|steroid binding|cytoplasm|rough endoplasmic reticulum|glucocorticoid biosynthetic process|steroid catabolic process|glucocorticoid catabolic process|oxidoreductase activity|integral component of endoplasmic reticulum membrane|lung development|response to nutrient levels|nuclear membrane|protein homodimerization activity|intracellular membrane…	rno00140,rno00980,rno05204	Steroid hormone biosynthesis|Metabolism of xenobiotics by cytochrome P450|Chemical carcinogenesis
Slc11a1	818.8458549	264.0201759	1373.671534	5.202903639	2.379316988	1.80E-09	9.79E-07	6.769267455	33.56790843	316519	solute carrier family 11 member 1	GO:0001818,GO:0001819,GO:0002309,GO:0002606,GO:0002827,GO:0005381,GO:0005384,GO:0005764,GO:0005770,GO:0005886,GO:0006826,GO:0006828,GO:0006876,GO:0006879,GO:0006909,GO:0006954,GO:0007035,GO:0009617,GO:0009986,GO:0010008,GO:0010628,GO:0015086,GO:0015707,GO:0016021,GO:0030001,GO:0030670,GO:0032147,GO:0032496,GO:0032729,GO:0034341,GO:0034755,GO:0042060,GO:0042116,GO:0042742,GO:0042803,GO:0042832,GO:…	negative regulation of cytokine production|positive regulation of cytokine production|T cell proliferation involved in immune response|positive regulation of dendritic cell antigen processing and presentation|positive regulation of T-helper 1 type immune response|iron ion transmembrane transporter activity|manganese ion transmembrane transporter activity|lysosome|late endosome|plasma membrane|iro…	rno04142	Lysosome
Tnnc2	15.45946539	5.019394979	25.89953581	5.159891963	2.367340859	0.071461781	1	0.394887116	1.942005244	296369	troponin C2, fast skeletal type	GO:0003009,GO:0003779,GO:0005509,GO:0005861,GO:0006937,GO:0048306,GO:0051015	skeletal muscle contraction|actin binding|calcium ion binding|troponin complex|regulation of muscle contraction|calcium-dependent protein binding|actin filament binding	rno04020	Calcium signaling pathway
Galnt6	52.36295514	17.06594293	87.65996736	5.136544036	2.360798013	0.011937667	0.425915399	0.230309821	1.127509734	100361647	polypeptide N-acetylgalactosaminyltransferase 6	GO:0000139,GO:0004653,GO:0005794,GO:0006486,GO:0016021,GO:0030246,GO:0048471	Golgi membrane|polypeptide N-acetylgalactosaminyltransferase activity|Golgi apparatus|protein glycosylation|integral component of membrane|carbohydrate binding|perinuclear region of cytoplasm	rno00512,rno00514	Mucin type O-glycan biosynthesis|Other types of O-glycan biosynthesis
Rbm47	76.79925898	25.09697489	128.5015431	5.120200486	2.356200301	0.004897969	0.23428169	0.283249023	1.382267869	305340	RNA binding motif protein 47	GO:0002244,GO:0003723,GO:0003729,GO:0005634,GO:0016554	hematopoietic progenitor cell differentiation|RNA binding|mRNA binding|nucleus|cytidine to uridine editing
Cyp1b1	2746.862233	908.5104912	4585.213974	5.046957651	2.335413981	2.57E-12	2.63E-09	21.09471997	101.4706053	25426	cytochrome P450, family 1, subfamily b, polypeptide 1	GO:0001525,GO:0002930,GO:0004497,GO:0005506,GO:0005634,GO:0005739,GO:0005789,GO:0006304,GO:0006725,GO:0006805,GO:0006809,GO:0007155,GO:0007584,GO:0008202,GO:0008210,GO:0008285,GO:0008584,GO:0008631,GO:0009404,GO:0009636,GO:0010033,GO:0010575,GO:0014070,GO:0014911,GO:0016020,GO:0016021,GO:0016491,GO:0016705,GO:0016712,GO:0018894,GO:0019369,GO:0020037,GO:0030199,GO:0030325,GO:0030336,GO:0032088,GO:…	angiogenesis|trabecular meshwork development|monooxygenase activity|iron ion binding|nucleus|mitochondrion|endoplasmic reticulum membrane|DNA modification|cellular aromatic compound metabolic process|xenobiotic metabolic process|nitric oxide biosynthetic process|cell adhesion|response to nutrient|steroid metabolic process|estrogen metabolic process|negative regulation of cell population prolifera…	rno00140,rno00380,rno00980,rno04913,rno05204,rno05206	Steroid hormone biosynthesis|Tryptophan metabolism|Metabolism of xenobiotics by cytochrome P450|Ovarian steroidogenesis|Chemical carcinogenesis|MicroRNAs in cancer
Cd40	51.36681915	17.06594293	85.66769537	5.019804398	2.327631149	0.013537814	0.463078337	0.540367169	2.5853097	171369	CD40 molecule	GO:0001934,GO:0002637,GO:0002768,GO:0003823,GO:0005615,GO:0005737,GO:0005886,GO:0006874,GO:0006954,GO:0009617,GO:0009897,GO:0009986,GO:0019724,GO:0019899,GO:0019904,GO:0023035,GO:0030890,GO:0031625,GO:0031667,GO:0032735,GO:0033590,GO:0034341,GO:0035631,GO:0035666,GO:0036018,GO:0038023,GO:0042113,GO:0042531,GO:0042832,GO:0043025,GO:0043123,GO:0043196,GO:0043231,GO:0043406,GO:0043491,GO:0043536,GO:…	positive regulation of protein phosphorylation|regulation of immunoglobulin production|immune response-regulating cell surface receptor signaling pathway|antigen binding|extracellular space|cytoplasm|plasma membrane|cellular calcium ion homeostasis|inflammatory response|response to bacterium|external side of plasma membrane|cell surface|B cell mediated immunity|enzyme binding|protein domain speci…	rno04060,rno04064,rno04514,rno04620,rno04672,rno05144,rno05145,rno05166,rno05169,rno05202,rno05310,rno05320,rno05322,rno05330,rno05340,rno05416,rno05417	Cytokine-cytokine receptor interaction|NF-kappa B signaling pathway|Cell adhesion molecules|Toll-like receptor signaling pathway|Intestinal immune network for IgA production|Malaria|Toxoplasmosis|Human T-cell leukemia virus 1 infection|Epstein-Barr virus infection|Transcriptional misregulation in cancer|Asthma|Autoimmune thyroid disease|Systemic lupus erythematosus|Allograft rejection|Primary imm…
Scara5	87.27417291	29.11249088	145.4358549	4.99565137	2.3206728	0.00387394	0.196889576	0.432345693	2.058543675	305974	scavenger receptor class A, member 5	GO:0005044,GO:0005887,GO:0006879,GO:0006897,GO:0009897,GO:0009986,GO:0034605,GO:0034755,GO:0070207,GO:0070287	scavenger receptor activity|integral component of plasma membrane|cellular iron ion homeostasis|endocytosis|external side of plasma membrane|cell surface|cellular response to heat|iron ion transmembrane transport|protein homotrimerization|ferritin receptor activity
Cacng1	2.99227948	1.003878996	4.980679964	4.96143458	2.310757331	0.411975664	1	0.068792987	0.325303143	29658	calcium voltage-gated channel auxiliary subunit gamma 1	GO:0005245,GO:0005246,GO:0005887,GO:0005891,GO:0030315,GO:0034765,GO:0042383,GO:0070296,GO:0070588,GO:1902514,GO:1990454	voltage-gated calcium channel activity|calcium channel regulator activity|integral component of plasma membrane|voltage-gated calcium channel complex|T-tubule|regulation of ion transmembrane transport|sarcolemma|sarcoplasmic reticulum calcium ion transport|calcium ion transmembrane transport|regulation of calcium ion transmembrane transport via high voltage-gated calcium channel|L-type voltage-ga…	rno04010,rno04260,rno04261,rno04921,rno05410,rno05412,rno05414	MAPK signaling pathway|Cardiac muscle contraction|Adrenergic signaling in cardiomyocytes|Oxytocin signaling pathway|Hypertrophic cardiomyopathy|Arrhythmogenic right ventricular cardiomyopathy|Dilated cardiomyopathy
Crhr2	2.99227948	1.003878996	4.980679964	4.96143458	2.310757331	0.411975664	1	0.018467614	0.087328277	64680	corticotropin releasing hormone receptor 2	GO:0004930,GO:0005179,GO:0005783,GO:0005791,GO:0005794,GO:0005886,GO:0007015,GO:0007166,GO:0007186,GO:0007188,GO:0007205,GO:0007631,GO:0008528,GO:0009755,GO:0009986,GO:0010460,GO:0010628,GO:0010629,GO:0010700,GO:0014064,GO:0015056,GO:0016021,GO:0016525,GO:0017046,GO:0019233,GO:0021549,GO:0021854,GO:0030424,GO:0030425,GO:0030855,GO:0032755,GO:0032811,GO:0032874,GO:0033685,GO:0035482,GO:0042423,GO:…	G protein-coupled receptor activity|hormone activity|endoplasmic reticulum|rough endoplasmic reticulum|Golgi apparatus|plasma membrane|actin filament organization|cell surface receptor signaling pathway|G protein-coupled receptor signaling pathway|adenylate cyclase-modulating G protein-coupled receptor signaling pathway|protein kinase C-activating G protein-coupled receptor signaling pathway|feed…	rno04080,rno04934	Neuroactive ligand-receptor interaction|Cushing syndrome
Enpep	14.9613974	5.019394979	24.90339982	4.96143458	2.310757331	0.080541845	1	0.07397676	0.349815782	64017	glutamyl aminopeptidase	GO:0001525,GO:0003081,GO:0004177,GO:0005737,GO:0005886,GO:0005903,GO:0006508,GO:0007165,GO:0008217,GO:0008233,GO:0008270,GO:0008283,GO:0009897,GO:0016021,GO:0016324,GO:0016477,GO:0031410,GO:0031526,GO:0032835,GO:0042277,GO:0043171,GO:0045177,GO:0070006	angiogenesis|regulation of systemic arterial blood pressure by renin-angiotensin|aminopeptidase activity|cytoplasm|plasma membrane|brush border|proteolysis|signal transduction|regulation of blood pressure|peptidase activity|zinc ion binding|cell population proliferation|external side of plasma membrane|integral component of membrane|apical plasma membrane|cell migration|cytoplasmic vesicle|brush …	rno04614	Renin-angiotensin system
Gdpd3	8.976838439	3.011636987	14.94203989	4.96143458	2.310757331	0.146510049	1	0.166480378	0.787239991	293490	glycerophosphodiester phosphodiesterase domain containing 3	GO:0004622,GO:0005783,GO:0005789,GO:0006644,GO:0008081,GO:0016021,GO:0034638,GO:0046475,GO:0048471,GO:0070291	lysophospholipase activity|endoplasmic reticulum|endoplasmic reticulum membrane|phospholipid metabolic process|phosphoric diester hydrolase activity|integral component of membrane|phosphatidylcholine catabolic process|glycerophospholipid catabolic process|perinuclear region of cytoplasm|N-acylethanolamine metabolic process	rno00565	Ether lipid metabolism
Hpse2	2.99227948	1.003878996	4.980679964	4.96143458	2.310757331	0.411975664	1	0.007890029	0.037309779	368128	heparanase 2 (inactive)	GO:0008284,GO:0030198,GO:0030305,GO:0031012,GO:0043395	positive regulation of cell population proliferation|extracellular matrix organization|heparanase activity|extracellular matrix|heparan sulfate proteoglycan binding	rno00531,rno05205	Glycosaminoglycan degradation|Proteoglycans in cancer
Iqcn	5.984558959	2.007757992	9.961359927	4.96143458	2.310757331	0.224459404	1	0.00857175	0.040533452	102547294		GO:0005739	mitochondrion
Klhl1	2.99227948	1.003878996	4.980679964	4.96143458	2.310757331	0.411975664	1	0.013758597	0.065060629	290426	kelch-like family member 1	GO:0005737,GO:0007626,GO:0007628,GO:0016358,GO:0021680,GO:0030425,GO:0043025	cytoplasm|locomotory behavior|adult walking behavior|dendrite development|cerebellar Purkinje cell layer development|dendrite|neuronal cell body
LOC102557182	2.99227948	1.003878996	4.980679964	4.96143458	2.310757331	0.411975664	1	0.090187935	0.426473977	102557182
LOC108349721	5.984558959	2.007757992	9.961359927	4.96143458	2.310757331	0.224459404	1	0.17616148	0.833019263	108349721
LOC108351926	2.99227948	1.003878996	4.980679964	4.96143458	2.310757331	0.411975664	1	0.083281053	0.393813231	108351926
LOC120096701	2.99227948	1.003878996	4.980679964	4.96143458	2.310757331	0.411975664	1	0.11780799	0.557081632	120096701
LOC120097436	2.99227948	1.003878996	4.980679964	4.96143458	2.310757331	0.411975664	1	0.021139378	0.099962312	120097436
Npffr1	2.99227948	1.003878996	4.980679964	4.96143458	2.310757331	0.411975664	1	0.013249258	0.062652105	64107	neuropeptide FF receptor 1	GO:0004930,GO:0005886,GO:0005887,GO:0005929,GO:0007186,GO:0007218,GO:0008188,GO:0016021,GO:0042277	G protein-coupled receptor activity|plasma membrane|integral component of plasma membrane|cilium|G protein-coupled receptor signaling pathway|neuropeptide signaling pathway|neuropeptide receptor activity|integral component of membrane|peptide binding	rno04080	Neuroactive ligand-receptor interaction
Oprk1	2.99227948	1.003878996	4.980679964	4.96143458	2.310757331	0.411975664	1	0.011364115	0.053737778	29335	opioid receptor, kappa 1	GO:0004930,GO:0004985,GO:0005515,GO:0005654,GO:0005829,GO:0005886,GO:0005887,GO:0006955,GO:0007200,GO:0007218,GO:0007626,GO:0009314,GO:0010996,GO:0016021,GO:0019233,GO:0030285,GO:0030425,GO:0031635,GO:0032868,GO:0033603,GO:0033612,GO:0033685,GO:0038003,GO:0038048,GO:0040017,GO:0042220,GO:0042277,GO:0042711,GO:0042755,GO:0042923,GO:0043005,GO:0043025,GO:0043204,GO:0043278,GO:0043627,GO:0043679,GO:…	G protein-coupled receptor activity|G protein-coupled opioid receptor activity|protein binding|nucleoplasm|cytosol|plasma membrane|integral component of plasma membrane|immune response|phospholipase C-activating G protein-coupled receptor signaling pathway|neuropeptide signaling pathway|locomotory behavior|response to radiation|response to auditory stimulus|integral component of membrane|sensory …	rno04080	Neuroactive ligand-receptor interaction
Pglyrp1	2.99227948	1.003878996	4.980679964	4.96143458	2.310757331	0.411975664	1	0.089758468	0.424443149	84387	peptidoglycan recognition protein 1	GO:0005576,GO:0006955,GO:0008270,GO:0008745,GO:0009253,GO:0009617,GO:0016019,GO:0016045,GO:0031640,GO:0032689,GO:0032827,GO:0042834,GO:0045087,GO:0045187,GO:0050728,GO:0050830,GO:0051701,GO:0061844	extracellular region|immune response|zinc ion binding|N-acetylmuramoyl-L-alanine amidase activity|peptidoglycan catabolic process|response to bacterium|peptidoglycan immune receptor activity|detection of bacterium|killing of cells of other organism|negative regulation of interferon-gamma production|negative regulation of natural killer cell differentiation involved in immune response|peptidoglyca…
RGD1309808	2.99227948	1.003878996	4.980679964	4.96143458	2.310757331	0.411975664	1	0.023213397	0.10976978	362951	similar to apolipoprotein L2; apolipoprotein L-II	GO:0005576,GO:0006869,GO:0042157	extracellular region|lipid transport|lipoprotein metabolic process
RGD1562758	8.976838439	3.011636987	14.94203989	4.96143458	2.310757331	0.146510049	1	0.137141071	0.648502466	498881
RT1-M6-1	17.95367688	6.023273975	29.88407978	4.96143458	2.310757331	0.064925359	1	0.316794594	1.498034642	414785	RT1 class I, locus M6, gene 1	GO:0001916,GO:0002476,GO:0002486,GO:0005102,GO:0005615,GO:0006955,GO:0009897,GO:0016021,GO:0042605	positive regulation of T cell mediated cytotoxicity|antigen processing and presentation of endogenous peptide antigen via MHC class Ib|antigen processing and presentation of endogenous peptide antigen via MHC class I via ER pathway, TAP-independent|signaling receptor binding|extracellular space|immune response|external side of plasma membrane|integral component of membrane|peptide antigen binding	rno04144,rno04145,rno04218,rno04514,rno04612,rno04650,rno04940,rno05163,rno05165,rno05166,rno05167,rno05168,rno05169,rno05170,rno05203,rno05320,rno05330,rno05332,rno05416	Endocytosis|Phagosome|Cellular senescence|Cell adhesion molecules|Antigen processing and presentation|Natural killer cell mediated cytotoxicity|Type I diabetes mellitus|Human cytomegalovirus infection|Human papillomavirus infection|Human T-cell leukemia virus 1 infection|Kaposi sarcoma-associated herpesvirus infection|Herpes simplex virus 1 infection|Epstein-Barr virus infection|Human immunodefic…
Slc24a1	2.99227948	1.003878996	4.980679964	4.96143458	2.310757331	0.411975664	1	0.015928968	0.075323714	56814	solute carrier family 24 member 1	GO:0005262,GO:0005886,GO:0005887,GO:0006874,GO:0007601,GO:0008273,GO:0015293,GO:0016021,GO:0031226,GO:0035725,GO:0060291,GO:0060292,GO:0070588,GO:0071805,GO:0098656	calcium channel activity|plasma membrane|integral component of plasma membrane|cellular calcium ion homeostasis|visual perception|calcium, potassium:sodium antiporter activity|symporter activity|integral component of membrane|intrinsic component of plasma membrane|sodium ion transmembrane transport|long-term synaptic potentiation|long-term synaptic depression|calcium ion transmembrane transport|p…	rno04744	Phototransduction
Slc38a5	5.984558959	2.007757992	9.961359927	4.96143458	2.310757331	0.224459404	1	0.055575268	0.26280018	192208	solute carrier family 38, member 5	GO:0003333,GO:0005290,GO:0005887,GO:0006867,GO:0006868,GO:0015171,GO:0015175,GO:0015182,GO:0015186,GO:0015187,GO:0015194,GO:0015804,GO:0015816,GO:0015825,GO:0016021,GO:0022858,GO:0022889,GO:0032329,GO:0089709,GO:1903713,GO:1904557	amino acid transmembrane transport|L-histidine transmembrane transporter activity|integral component of plasma membrane|asparagine transport|glutamine transport|amino acid transmembrane transporter activity|neutral amino acid transmembrane transporter activity|L-asparagine transmembrane transporter activity|L-glutamine transmembrane transporter activity|glycine transmembrane transporter activity|…	rno04727	GABAergic synapse
Tmprss11f	32.91507428	11.04266895	54.7874796	4.96143458	2.310757331	0.029830116	0.728229079	0.23859846	1.128266597	498345		GO:0004252,GO:0005576,GO:0005887,GO:0006508,GO:0009986,GO:0033561	serine-type endopeptidase activity|extracellular region|integral component of plasma membrane|proteolysis|cell surface|regulation of water loss via skin
Txk	2.99227948	1.003878996	4.980679964	4.96143458	2.310757331	0.411975664	1	0.019799662	0.093627165	305311	TXK tyrosine kinase	GO:0001819,GO:0001865,GO:0002250,GO:0004713,GO:0004714,GO:0004715,GO:0005524,GO:0005634,GO:0005737,GO:0006468,GO:0007202,GO:0007229,GO:0010468,GO:0010543,GO:0032729,GO:0038083,GO:0042246,GO:0045944,GO:0046777,GO:0050852,GO:0060335	positive regulation of cytokine production|NK T cell differentiation|adaptive immune response|protein tyrosine kinase activity|transmembrane receptor protein tyrosine kinase activity|non-membrane spanning protein tyrosine kinase activity|ATP binding|nucleus|cytoplasm|protein phosphorylation|activation of phospholipase C activity|integrin-mediated signaling pathway|regulation of gene expression|re…	rno04670	Leukocyte transendothelial migration
Slc6a12	53.36296264	18.06982192	88.65610335	4.906307529	2.294637665	0.013683667	0.464417776	0.407470388	1.905406512	50676	solute carrier family 6 member 12	GO:0005332,GO:0005887,GO:0006836,GO:0008028,GO:0009992,GO:0010033,GO:0015718,GO:0015812,GO:0016021,GO:0035725,GO:0043005,GO:0055085,GO:0071474	gamma-aminobutyric acid:sodium symporter activity|integral component of plasma membrane|neurotransmitter transport|monocarboxylic acid transmembrane transporter activity|cellular water homeostasis|response to organic substance|monocarboxylic acid transport|gamma-aminobutyric acid transport|integral component of membrane|sodium ion transmembrane transport|neuron projection|transmembrane transport|…	rno04721,rno04727	Synaptic vesicle cycle|GABAergic synapse
Angptl4	697.2204763	238.923201	1155.517752	4.836356397	2.273920563	2.98E-08	1.15E-05	6.574687212	30.30611167	362850	angiopoietin-like 4	GO:0001525,GO:0001666,GO:0004857,GO:0005102,GO:0005576,GO:0005615,GO:0006629,GO:0019216,GO:0042802,GO:0043066,GO:0043086,GO:0043335,GO:0051005,GO:0062023,GO:0070328,GO:2000352	angiogenesis|response to hypoxia|enzyme inhibitor activity|signaling receptor binding|extracellular region|extracellular space|lipid metabolic process|regulation of lipid metabolic process|identical protein binding|negative regulation of apoptotic process|negative regulation of catalytic activity|protein unfolding|negative regulation of lipoprotein lipase activity|collagen-containing extracellula…	rno03320,rno04979	PPAR signaling pathway|Cholesterol metabolism
Slco4a1	64.33594456	22.08533791	106.5865512	4.826122728	2.270864604	0.009847165	0.377640964	0.392198099	1.80401719	171144	solute carrier organic anion transporter family, member 4a1	GO:0005886,GO:0005887,GO:0006811,GO:0015347,GO:0015349,GO:0016021,GO:0022857,GO:0042403,GO:0043252,GO:0055085,GO:0070327	plasma membrane|integral component of plasma membrane|ion transport|sodium-independent organic anion transmembrane transporter activity|thyroid hormone transmembrane transporter activity|integral component of membrane|transmembrane transporter activity|thyroid hormone metabolic process|sodium-independent organic anion transport|transmembrane transport|thyroid hormone transport
Lif	729.6490971	252.9775069	1206.320687	4.768489902	2.253532462	2.63E-08	1.04E-05	2.483453192	11.28687387	60584	LIF, interleukin 6 family cytokine	GO:0001974,GO:0005102,GO:0005125,GO:0005146,GO:0005615,GO:0005829,GO:0006955,GO:0007260,GO:0007566,GO:0008083,GO:0008284,GO:0008285,GO:0010628,GO:0010976,GO:0016525,GO:0019827,GO:0030324,GO:0031100,GO:0033138,GO:0033141,GO:0033630,GO:0042531,GO:0043410,GO:0045595,GO:0045651,GO:0045835,GO:0045944,GO:0046697,GO:0046888,GO:0048286,GO:0048644,GO:0048666,GO:0048708,GO:0048711,GO:0048861,GO:0048863,GO:…	blood vessel remodeling|signaling receptor binding|cytokine activity|leukemia inhibitory factor receptor binding|extracellular space|cytosol|immune response|tyrosine phosphorylation of STAT protein|embryo implantation|growth factor activity|positive regulation of cell population proliferation|negative regulation of cell population proliferation|positive regulation of gene expression|positive regu…	rno04060,rno04550,rno04630,rno04668	Cytokine-cytokine receptor interaction|Signaling pathways regulating pluripotency of stem cells|JAK-STAT signaling pathway|TNF signaling pathway
Rtp3	14.4633294	5.019394979	23.90726383	4.762977197	2.251863642	0.090909229	1	0.109673846	0.497872801	316018	receptor (chemosensory) transporter protein 3	GO:0001580,GO:0005737,GO:0006612,GO:0016021,GO:0031849,GO:0051205	detection of chemical stimulus involved in sensory perception of bitter taste|cytoplasm|protein targeting to membrane|integral component of membrane|olfactory receptor binding|protein insertion into membrane
Tafa3	14.4633294	5.019394979	23.90726383	4.762977197	2.251863642	0.090909229	1	0.053742478	0.243968082	691123		GO:0005615,GO:0007165,GO:0014016,GO:0048018,GO:1902692,GO:1903979,GO:1903980	extracellular space|signal transduction|neuroblast differentiation|receptor ligand activity|regulation of neuroblast proliferation|negative regulation of microglial cell activation|positive regulation of microglial cell activation
Pstpip1	172.5638168	60.23273975	284.8948939	4.729900966	2.241809977	0.000495763	0.045192338	0.495671307	2.234511804	300732	proline-serine-threonine phosphatase-interacting protein 1	GO:0001725,GO:0003779,GO:0005737,GO:0005826,GO:0005884,GO:0005886,GO:0019903,GO:0030041,GO:0032154,GO:0042802,GO:0051015	stress fiber|actin binding|cytoplasm|actomyosin contractile ring|actin filament|plasma membrane|protein phosphatase binding|actin filament polymerization|cleavage furrow|identical protein binding|actin filament binding	rno04621	NOD-like receptor signaling pathway
RGD1560263	11.47104992	4.015515983	18.92658386	4.713362851	2.236756749	0.120365039	1	0.085194478	0.382718229	499670				rno04140,rno05010,rno05014,rno05016,rno05017,rno05022	Autophagy - animal|Alzheimer disease|Amyotrophic lateral sclerosis|Huntington disease|Spinocerebellar ataxia|Pathways of neurodegeneration - multiple diseases
Nostrin	31.42087029	11.04266895	51.79907162	4.690810876	2.229837335	0.037533593	0.827855668	0.162239485	0.725339465	311111	nitric oxide synthase trafficking	GO:0003677,GO:0005634,GO:0005856,GO:0005886,GO:0006897,GO:0007165,GO:0031410,GO:0045892	DNA binding|nucleus|cytoskeleton|plasma membrane|endocytosis|signal transduction|cytoplasmic vesicle|negative regulation of transcription, DNA-templated
Grm3	308.2241439	108.4189315	508.0293563	4.685799325	2.228295171	2.66E-05	0.004055787	1.185397162	5.294005575	24416	glutamate metabotropic receptor 3	GO:0001640,GO:0001641,GO:0005246,GO:0005886,GO:0005887,GO:0007196,GO:0007216,GO:0010467,GO:0014069,GO:0019233,GO:0030424,GO:0042734,GO:0043005,GO:0043197,GO:0045211,GO:0050804,GO:0051966,GO:0097110,GO:0097449,GO:0098978,GO:0099055,GO:0099056	adenylate cyclase inhibiting G protein-coupled glutamate receptor activity|group II metabotropic glutamate receptor activity|calcium channel regulator activity|plasma membrane|integral component of plasma membrane|adenylate cyclase-inhibiting G protein-coupled glutamate receptor signaling pathway|G protein-coupled glutamate receptor signaling pathway|gene expression|postsynaptic density|sensory p…	rno04072,rno04080,rno04724,rno05030	Phospholipase D signaling pathway|Neuroactive ligand-receptor interaction|Glutamatergic synapse|Cocaine addiction
Slc26a4	76.80700198	27.10473289	126.5092711	4.667423642	2.22262642	0.007541104	0.321809212	0.159506012	0.709563233	29440	solute carrier family 26 member 4	GO:0005887,GO:0006885,GO:0008271,GO:0015106,GO:0015108,GO:0015111,GO:0015116,GO:0015301,GO:0015698,GO:0015701,GO:0015705,GO:0016020,GO:0016324,GO:0019531,GO:0019532,GO:0031526,GO:0032880,GO:0070062,GO:1902358,GO:1902476	integral component of plasma membrane|regulation of pH|secondary active sulfate transmembrane transporter activity|bicarbonate transmembrane transporter activity|chloride transmembrane transporter activity|iodide transmembrane transporter activity|sulfate transmembrane transporter activity|anion:anion antiporter activity|inorganic anion transport|bicarbonate transport|iodide transport|membrane|ap…	rno04918	Thyroid hormone synthesis
Arhgap22	176.0580358	62.24049774	289.8755739	4.657346654	2.219508268	0.000511821	0.045699038	0.5410441	2.401640815	306279	Rho GTPase activating protein 22	GO:0005096,GO:0007165,GO:0090630,GO:0098978,GO:0099175	GTPase activator activity|signal transduction|activation of GTPase activity|glutamatergic synapse|regulation of postsynapse organization
Tasl	36.90736125	13.05042694	60.76429556	4.656115529	2.219126855	0.030720825	0.740831425	0.471836877	2.093883209	501570	TLR adaptor interacting with endolysosomal SLC15A4	GO:0034157,GO:0034161,GO:0035751,GO:0036020,GO:0045089	positive regulation of toll-like receptor 7 signaling pathway|positive regulation of toll-like receptor 8 signaling pathway|regulation of lysosomal lumen pH|endolysosome membrane|positive regulation of innate immune response
Fxyd5	645.8807576	228.884411	1062.877104	4.643728681	2.215283682	1.16E-07	3.80E-05	14.40548198	63.757526	60338	FXYD domain-containing ion transport regulator 5	GO:0003779,GO:0006811,GO:0016021,GO:0017080,GO:0045296,GO:0099106,GO:2000649	actin binding|ion transport|integral component of membrane|sodium channel regulator activity|cadherin binding|ion channel regulator activity|regulation of sodium ion transmembrane transporter activity
Exoc3l2	8.478770443	3.011636987	13.9459039	4.630672275	2.211221657	0.17247685	1	0.041970189	0.185234467	686809		GO:0000145,GO:0000149,GO:0001701,GO:0006887,GO:0051601	exocyst|SNARE binding|in utero embryonic development|exocytosis|exocyst localization
Tbx4	8.478770443	3.011636987	13.9459039	4.630672275	2.211221657	0.17247685	1	0.016427182	0.072500989	303399	T-box transcription factor 4	GO:0000978,GO:0000981,GO:0001525,GO:0001708,GO:0002009,GO:0005634,GO:0006357,GO:0030324,GO:0030326,GO:0035108,GO:0035116,GO:0048705,GO:1990401	RNA polymerase II cis-regulatory region sequence-specific DNA binding|DNA-binding transcription factor activity, RNA polymerase II-specific|angiogenesis|cell fate specification|morphogenesis of an epithelium|nucleus|regulation of transcription by RNA polymerase II|lung development|embryonic limb morphogenesis|limb morphogenesis|embryonic hindlimb morphogenesis|skeletal system morphogenesis|embryo…			T-box
Ccl7	2112.213848	750.9014888	3473.526207	4.625808123	2.209705425	5.72E-11	4.15E-08	52.41360664	231.0832597	287561	C-C motif chemokine ligand 7	GO:0002548,GO:0005615,GO:0006954,GO:0007010,GO:0007186,GO:0008009,GO:0008201,GO:0008360,GO:0010332,GO:0030335,GO:0030593,GO:0031726,GO:0031727,GO:0043547,GO:0048020,GO:0048245,GO:0048247,GO:0070098,GO:0070374,GO:0071346,GO:0071347,GO:0071356,GO:0071361,GO:2000503	monocyte chemotaxis|extracellular space|inflammatory response|cytoskeleton organization|G protein-coupled receptor signaling pathway|chemokine activity|heparin binding|regulation of cell shape|response to gamma radiation|positive regulation of cell migration|neutrophil chemotaxis|CCR1 chemokine receptor binding|CCR2 chemokine receptor binding|positive regulation of GTPase activity|CCR chemokine r…	rno04060,rno04061,rno04062,rno04657	Cytokine-cytokine receptor interaction|Viral protein interaction with cytokine and cytokine receptor|Chemokine signaling pathway|IL-17 signaling pathway
Areg	13.96526141	5.019394979	22.91112783	4.564519813	2.190463097	0.102766467	1	0.24607413	1.070527628	29183	amphiregulin	GO:0005125,GO:0005154,GO:0005615,GO:0005634,GO:0005737,GO:0007173,GO:0007186,GO:0007417,GO:0008083,GO:0008284,GO:0009986,GO:0014009,GO:0014070,GO:0016021,GO:0031175,GO:0032355,GO:0042327,GO:0042542,GO:0043434,GO:0045668,GO:0045741,GO:0050731,GO:0051384,GO:0051591,GO:0060598,GO:0060744,GO:0060749,GO:0060750	cytokine activity|epidermal growth factor receptor binding|extracellular space|nucleus|cytoplasm|epidermal growth factor receptor signaling pathway|G protein-coupled receptor signaling pathway|central nervous system development|growth factor activity|positive regulation of cell population proliferation|cell surface|glial cell proliferation|response to organic cyclic compound|integral component of…	rno04010,rno04012,rno04151,rno04390,rno05210	MAPK signaling pathway|ErbB signaling pathway|PI3K-Akt signaling pathway|Hippo signaling pathway|Colorectal cancer
Slc6a20	33.41701377	12.04654795	54.7874796	4.547981698	2.185226449	0.03787535	0.828476433	0.314883536	1.364914626	113918	solute carrier family 6 member 20	GO:0005298,GO:0005887,GO:0006865,GO:0015171,GO:0015175,GO:0015193,GO:0015199,GO:0015293,GO:0015816,GO:0015824,GO:0015838,GO:0016324,GO:0035524,GO:0035725,GO:0055085,GO:0089718,GO:1904271,GO:1905647	proline:sodium symporter activity|integral component of plasma membrane|amino acid transport|amino acid transmembrane transporter activity|neutral amino acid transmembrane transporter activity|L-proline transmembrane transporter activity|amino-acid betaine transmembrane transporter activity|symporter activity|glycine transport|proline transport|amino-acid betaine transport|apical plasma membrane|…
Ccdc68	5.486490963	2.007757992	8.965223934	4.465291122	2.158754237	0.273502621	1	0.069044976	0.293845257	291530	coiled-coil domain containing 68	GO:0005622,GO:0005814,GO:0008104,GO:0034454,GO:0035556,GO:0120103	intracellular anatomical structure|centriole|protein localization|microtubule anchoring at centrosome|intracellular signal transduction|centriolar subdistal appendage
Cox6a2	5.486490963	2.007757992	8.965223934	4.465291122	2.158754237	0.273502621	1	0.223068383	0.949346214	25278	cytochrome c oxidase subunit 6A2	GO:0004129,GO:0005751,GO:0006119,GO:0006123,GO:0016021,GO:0022900,GO:0030234,GO:0050790,GO:1902600	cytochrome-c oxidase activity|mitochondrial respiratory chain complex IV|oxidative phosphorylation|mitochondrial electron transport, cytochrome c to oxygen|integral component of membrane|electron transport chain|enzyme regulator activity|regulation of catalytic activity|proton transmembrane transport	rno00190,rno04260,rno04714,rno04932,rno05010,rno05012,rno05014,rno05016,rno05020,rno05022,rno05415	Oxidative phosphorylation|Cardiac muscle contraction|Thermogenesis|Non-alcoholic fatty liver disease|Alzheimer disease|Parkinson disease|Amyotrophic lateral sclerosis|Huntington disease|Prion disease|Pathways of neurodegeneration - multiple diseases|Diabetic cardiomyopathy
LOC100363017	5.486490963	2.007757992	8.965223934	4.465291122	2.158754237	0.273502621	1	0.308162588	1.311494633	100363017
Trem3	5.486490963	2.007757992	8.965223934	4.465291122	2.158754237	0.273502621	1	0.024612768	0.10474832	367215	triggering receptor expressed on myeloid cells 3	GO:0016021,GO:0030593,GO:0045089,GO:0070945,GO:0072672	integral component of membrane|neutrophil chemotaxis|positive regulation of innate immune response|neutrophil-mediated killing of gram-negative bacterium|neutrophil extravasation
Myof	2766.71275	1018.937181	4514.488319	4.43058552	2.14749737	8.86E-11	6.17E-08	8.386331458	35.41359146	309499	myoferlin	GO:0001778,GO:0005543,GO:0005886,GO:0005901,GO:0006071,GO:0007009,GO:0007520,GO:0016021,GO:0030659,GO:0030947,GO:0031410,GO:0033292,GO:0034605,GO:0043231,GO:0046872,GO:0055001,GO:0061025	plasma membrane repair|phospholipid binding|plasma membrane|caveola|glycerol metabolic process|plasma membrane organization|myoblast fusion|integral component of membrane|cytoplasmic vesicle membrane|regulation of vascular endothelial growth factor receptor signaling pathway|cytoplasmic vesicle|T-tubule organization|cellular response to heat|intracellular membrane-bounded organelle|metal ion bind…
Ahr	572.1008786	211.8184681	932.3832892	4.40180357	2.138094767	7.27E-07	0.000184607	2.306513276	9.676614568	25690	aryl hydrocarbon receptor	GO:0000122,GO:0000902,GO:0000976,GO:0000981,GO:0000987,GO:0001094,GO:0001223,GO:0001541,GO:0001568,GO:0001569,GO:0001782,GO:0001889,GO:0001974,GO:0002260,GO:0002376,GO:0002819,GO:0002841,GO:0003085,GO:0003214,GO:0003243,GO:0003677,GO:0003700,GO:0004879,GO:0005515,GO:0005634,GO:0005737,GO:0005829,GO:0006355,GO:0006357,GO:0006366,GO:0006805,GO:0006915,GO:0008015,GO:0009410,GO:0009636,GO:0010468,GO:…	negative regulation of transcription by RNA polymerase II|cell morphogenesis|transcription cis-regulatory region binding|DNA-binding transcription factor activity, RNA polymerase II-specific|cis-regulatory region sequence-specific DNA binding|TFIID-class transcription factor complex binding|transcription coactivator binding|ovarian follicle development|blood vessel development|branching involved …	rno04659,rno04934	Th17 cell differentiation|Cushing syndrome	bHLH
Slamf6	81.30122845	30.11636987	132.486087	4.399138661	2.137221076	0.008660087	0.348223497	1.037574954	4.350347573	498287	SLAM family member 6	GO:0001779,GO:0001787,GO:0005886,GO:0016021,GO:0032729,GO:0032740,GO:0045954,GO:0072540	natural killer cell differentiation|natural killer cell proliferation|plasma membrane|integral component of membrane|positive regulation of interferon-gamma production|positive regulation of interleukin-17 production|positive regulation of natural killer cell mediated cytotoxicity|T-helper 17 cell lineage commitment
Hebp2	32.42087778	12.04654795	52.79520761	4.382600546	2.13178719	0.043922306	0.893377646	0.266107459	1.111541704	308632	heme binding protein 2	GO:0005737,GO:0005739,GO:0010917,GO:0010940,GO:0020037,GO:0035794,GO:1901031	cytoplasm|mitochondrion|negative regulation of mitochondrial membrane potential|positive regulation of necrotic cell death|heme binding|positive regulation of mitochondrial membrane permeability|regulation of response to reactive oxygen species
Gp6	371.5949245	138.5353014	604.6545476	4.364624333	2.125857485	1.79E-05	0.002849826	1.962182858	8.162499594	684555		GO:0005518,GO:0005887,GO:0038063,GO:0038064,GO:0038065,GO:0097197	collagen binding|integral component of plasma membrane|collagen-activated tyrosine kinase receptor signaling pathway|collagen receptor activity|collagen-activated signaling pathway|tetraspanin-enriched microdomain	rno04512,rno04611	ECM-receptor interaction|Platelet activation
Cd53	739.205305	277.0706028	1201.340007	4.335862394	2.116318971	1.34E-07	4.23E-05	9.859256129	40.74332475	24251	Cd53 molecule	GO:0001772,GO:0005886,GO:0005887,GO:0005911,GO:0009986,GO:0040008,GO:0042802,GO:0045661,GO:0098609,GO:1901741	immunological synapse|plasma membrane|integral component of plasma membrane|cell-cell junction|cell surface|regulation of growth|identical protein binding|regulation of myoblast differentiation|cell-cell adhesion|positive regulation of myoblast fusion
LOC120095902	61.35140809	23.0892169	99.61359927	4.314290939	2.10912347	0.017209288	0.539187825	0.131853224	0.542171905	120095902
Arg1	7.980702446	3.011636987	12.94976791	4.299909969	2.104306453	0.203466538	1	0.091501351	0.374993461	29221	arginase 1	GO:0000050,GO:0001889,GO:0001938,GO:0002250,GO:0004053,GO:0005615,GO:0005737,GO:0005741,GO:0005829,GO:0006525,GO:0007565,GO:0007568,GO:0009611,GO:0009635,GO:0010042,GO:0010043,GO:0010269,GO:0010963,GO:0014075,GO:0019547,GO:0030145,GO:0030324,GO:0032496,GO:0032964,GO:0033189,GO:0033197,GO:0042130,GO:0042493,GO:0042802,GO:0042832,GO:0043005,GO:0043025,GO:0043200,GO:0043434,GO:0045087,GO:0046007,GO:…	urea cycle|liver development|positive regulation of endothelial cell proliferation|adaptive immune response|arginase activity|extracellular space|cytoplasm|mitochondrial outer membrane|cytosol|arginine metabolic process|female pregnancy|aging|response to wounding|response to herbicide|response to manganese ion|response to zinc ion|response to selenium ion|regulation of L-arginine import|response …	rno00220,rno00330,rno05146	Arginine biosynthesis|Arginine and proline metabolism|Amoebiasis
Asgr1	103.7491318	39.15128083	168.3469828	4.299909969	2.104306453	0.005213124	0.245312695	1.558562236	6.387344455	24210	asialoglycoprotein receptor 1	GO:0004873,GO:0006897,GO:0016021,GO:0030246,GO:0031668,GO:0042802,GO:0046872	asialoglycoprotein receptor activity|endocytosis|integral component of membrane|carbohydrate binding|cellular response to extracellular stimulus|identical protein binding|metal ion binding	rno04918	Thyroid hormone synthesis
Cela1	7.980702446	3.011636987	12.94976791	4.299909969	2.104306453	0.203466538	1	0.153246165	0.628037829	24331	chymotrypsin like elastase 1	GO:0000122,GO:0004252,GO:0005615,GO:0006508,GO:0006954,GO:0009791,GO:0016055,GO:0031017,GO:0035264,GO:0042127,GO:0045595,GO:0045766,GO:0045944,GO:0046872,GO:0048771,GO:0055123,GO:0060309,GO:0061113	negative regulation of transcription by RNA polymerase II|serine-type endopeptidase activity|extracellular space|proteolysis|inflammatory response|post-embryonic development|Wnt signaling pathway|exocrine pancreas development|multicellular organism growth|regulation of cell population proliferation|regulation of cell differentiation|positive regulation of angiogenesis|positive regulation of trans…
Eva1a	7.980702446	3.011636987	12.94976791	4.299909969	2.104306453	0.203466538	1	0.078466006	0.321571636	500221	eva-1 homolog A, regulator of programmed cell death	GO:0005886,GO:0016021,GO:0043231	plasma membrane|integral component of membrane|intracellular membrane-bounded organelle
Pax3	7.980702446	3.011636987	12.94976791	4.299909969	2.104306453	0.203466538	1	0.050249853	0.20593539	114502	paired box 3	GO:0000122,GO:0000978,GO:0000981,GO:0001221,GO:0001755,GO:0001843,GO:0003682,GO:0003700,GO:0005634,GO:0005654,GO:0006357,GO:0007507,GO:0007517,GO:0008283,GO:0008284,GO:0014807,GO:0016477,GO:0021527,GO:0021915,GO:0042063,GO:0043565,GO:0045893,GO:0045944,GO:0048066,GO:0048663,GO:0048856,GO:0060538,GO:0060594,GO:0071837,GO:1990837	negative regulation of transcription by RNA polymerase II|RNA polymerase II cis-regulatory region sequence-specific DNA binding|DNA-binding transcription factor activity, RNA polymerase II-specific|transcription coregulator binding|neural crest cell migration|neural tube closure|chromatin binding|DNA-binding transcription factor activity|nucleus|nucleoplasm|regulation of transcription by RNA poly…	rno05202	Transcriptional misregulation in cancer	PAX
Ptx3	2702.481336	1023.956576	4381.006096	4.278507702	2.097107688	2.30E-10	1.49E-07	29.97858195	122.2475685	689388	pentraxin 3	GO:0001550,GO:0001849,GO:0001872,GO:0001878,GO:0005615,GO:0008228,GO:0030198,GO:0031012,GO:0042802,GO:0044793,GO:0044869,GO:0044871,GO:0045087,GO:0045429,GO:0046597,GO:0046790,GO:0050766,GO:1903016,GO:1903019	ovarian cumulus expansion|complement component C1q complex binding|(1->3)-beta-D-glucan binding|response to yeast|extracellular space|opsonization|extracellular matrix organization|extracellular matrix|identical protein binding|negative regulation by host of viral process|negative regulation by host of viral exo-alpha-sialidase activity|negative regulation by host of viral glycoprotein metabolic …
Ntn3	26.43631882	10.03878996	42.83384769	4.266833739	2.093165896	0.060196337	1	0.232898826	0.947130551	114524	netrin 3	GO:0005102,GO:0005576,GO:0005604,GO:0005794,GO:0007411,GO:0008045,GO:0009887,GO:0009888,GO:0016358	signaling receptor binding|extracellular region|basement membrane|Golgi apparatus|axon guidance|motor neuron axon guidance|animal organ morphogenesis|tissue development|dendrite development	rno04360	Axon guidance
Osm	28.93053031	11.04266895	46.81839166	4.239771368	2.083986469	0.055301762	1	0.233493313	0.943525648	289747	oncostatin M	GO:0005125,GO:0005147,GO:0005615,GO:0006955,GO:0007260,GO:0007422,GO:0008083,GO:0008284,GO:0009408,GO:0014068,GO:0032740,GO:0033138,GO:0038165,GO:0040008,GO:0042531,GO:0043410,GO:0045835,GO:0045944,GO:0046888,GO:0048266,GO:0050729,GO:0050731,GO:0051897,GO:2001235	cytokine activity|oncostatin-M receptor binding|extracellular space|immune response|tyrosine phosphorylation of STAT protein|peripheral nervous system development|growth factor activity|positive regulation of cell population proliferation|response to heat|positive regulation of phosphatidylinositol 3-kinase signaling|positive regulation of interleukin-17 production|positive regulation of peptidyl…	rno04060,rno04151,rno04630	Cytokine-cytokine receptor interaction|PI3K-Akt signaling pathway|JAK-STAT signaling pathway
Ptger2	39.40544423	15.05818494	63.75270353	4.233757508	2.08193864	0.037814165	0.828476433	0.143279987	0.578160397	81752	prostaglandin E receptor 2	GO:0001501,GO:0004957,GO:0005886,GO:0006954,GO:0007189,GO:0007204,GO:0016021,GO:0032496,GO:0032570,GO:0033138,GO:0042127,GO:0043066,GO:0043154,GO:0071380,GO:1902219,GO:1904346	skeletal system development|prostaglandin E receptor activity|plasma membrane|inflammatory response|adenylate cyclase-activating G protein-coupled receptor signaling pathway|positive regulation of cytosolic calcium ion concentration|integral component of membrane|response to lipopolysaccharide|response to progesterone|positive regulation of peptidyl-serine phosphorylation|regulation of cell popul…	rno04024,rno04080,rno04750,rno04924,rno05163,rno05200	cAMP signaling pathway|Neuroactive ligand-receptor interaction|Inflammatory mediator regulation of TRP channels|Renin secretion|Human cytomegalovirus infection|Pathways in cancer
Ptgs1	257.3824933	98.38014158	416.384845	4.232407458	2.081478524	0.000203456	0.02186647	1.98840611	8.021016055	24693	prostaglandin-endoperoxide synthase 1	GO:0001516,GO:0001750,GO:0004601,GO:0004666,GO:0005634,GO:0005635,GO:0005737,GO:0005789,GO:0005794,GO:0006693,GO:0006954,GO:0006979,GO:0007568,GO:0007612,GO:0007613,GO:0008217,GO:0010243,GO:0010700,GO:0019233,GO:0019371,GO:0020037,GO:0032811,GO:0035633,GO:0042127,GO:0043231,GO:0045907,GO:0045987,GO:0046872,GO:0051213,GO:0051412,GO:0070542,GO:0098869	prostaglandin biosynthetic process|photoreceptor outer segment|peroxidase activity|prostaglandin-endoperoxide synthase activity|nucleus|nuclear envelope|cytoplasm|endoplasmic reticulum membrane|Golgi apparatus|prostaglandin metabolic process|inflammatory response|response to oxidative stress|aging|learning|memory|regulation of blood pressure|response to organonitrogen compound|negative regulation…	rno00590,rno04611,rno04726,rno04923	Arachidonic acid metabolism|Platelet activation|Serotonergic synapse|Regulation of lipolysis in adipocytes
LOC308990	94.27422537	36.13964385	152.4088069	4.217219393	2.076292077	0.007408929	0.318510759	0.846102269	3.400837497	308990	hypothetical protein LOC308990	GO:0016021	integral component of membrane
Pdgfb	253.3940778	97.37626259	409.411893	4.20443219	2.071910977	0.000233532	0.024059323	2.104811969	8.434463887	24628	platelet derived growth factor subunit B	GO:0001568,GO:0001666,GO:0001892,GO:0001938,GO:0002548,GO:0003104,GO:0005102,GO:0005161,GO:0005518,GO:0005576,GO:0005615,GO:0005737,GO:0006468,GO:0006929,GO:0007416,GO:0007507,GO:0008083,GO:0008284,GO:0008584,GO:0009611,GO:0009986,GO:0010033,GO:0010512,GO:0010544,GO:0010628,GO:0010629,GO:0010811,GO:0014068,GO:0014070,GO:0014911,GO:0016020,GO:0016176,GO:0016322,GO:0016323,GO:0018105,GO:0018108,GO:…	blood vessel development|response to hypoxia|embryonic placenta development|positive regulation of endothelial cell proliferation|monocyte chemotaxis|positive regulation of glomerular filtration|signaling receptor binding|platelet-derived growth factor receptor binding|collagen binding|extracellular region|extracellular space|cytoplasm|protein phosphorylation|substrate-dependent cell migration|sy…	rno01521,rno04010,rno04014,rno04015,rno04020,rno04072,rno04151,rno04510,rno04540,rno04630,rno04810,rno05167,rno05200,rno05206,rno05211,rno05214,rno05215,rno05218,rno05231,rno05418	EGFR tyrosine kinase inhibitor resistance|MAPK signaling pathway|Ras signaling pathway|Rap1 signaling pathway|Calcium signaling pathway|Phospholipase D signaling pathway|PI3K-Akt signaling pathway|Focal adhesion|Gap junction|JAK-STAT signaling pathway|Regulation of actin cytoskeleton|Kaposi sarcoma-associated herpesvirus infection|Pathways in cancer|MicroRNAs in cancer|Renal cell carcinoma|Glioma…
Cd33	451.9193745	173.6710663	730.1676827	4.204313927	2.071870396	7.78E-06	0.001396402	4.296344071	17.21595095	690492		GO:0002765,GO:0005654,GO:0005777,GO:0005794,GO:0005886,GO:0007155,GO:0009897,GO:0009986,GO:0016021,GO:0019903,GO:0032691,GO:0032717,GO:0032720,GO:0033691,GO:0050714,GO:0051926,GO:0098609,GO:0150102,GO:1903615	immune response-inhibiting signal transduction|nucleoplasm|peroxisome|Golgi apparatus|plasma membrane|cell adhesion|external side of plasma membrane|cell surface|integral component of membrane|protein phosphatase binding|negative regulation of interleukin-1 beta production|negative regulation of interleukin-8 production|negative regulation of tumor necrosis factor production|sialic acid binding|p…	rno04640	Hematopoietic cell lineage
Cidea	64.84562706	25.09697489	104.5942792	4.167605047	2.059218564	0.01779383	0.549305614	0.934984044	3.713877549	291541	cell death-inducing DFFA-like effector a	GO:0001659,GO:0001818,GO:0005634,GO:0005737,GO:0005739,GO:0005740,GO:0005811,GO:0006629,GO:0006915,GO:0008219,GO:0010890,GO:0019915,GO:0030512,GO:0032720,GO:0035634,GO:0042803,GO:0042981,GO:0050995,GO:0070417,GO:0120163,GO:1900118,GO:1902510	temperature homeostasis|negative regulation of cytokine production|nucleus|cytoplasm|mitochondrion|mitochondrial envelope|lipid droplet|lipid metabolic process|apoptotic process|cell death|positive regulation of sequestering of triglyceride|lipid storage|negative regulation of transforming growth factor beta receptor signaling pathway|negative regulation of tumor necrosis factor production|respon…
Cyp2d1	12.96912541	5.019394979	20.91885585	4.167605047	2.059218564	0.131939434	1	0.16740034	0.664935803	266684	cytochrome P450, family 2, subfamily d, polypeptide 1	GO:0004497,GO:0005506,GO:0005737,GO:0005739,GO:0005789,GO:0006082,GO:0006805,GO:0008395,GO:0010033,GO:0014070,GO:0016021,GO:0016712,GO:0019369,GO:0020037,GO:0042493,GO:0042738,GO:0043231,GO:0070330	monooxygenase activity|iron ion binding|cytoplasm|mitochondrion|endoplasmic reticulum membrane|organic acid metabolic process|xenobiotic metabolic process|steroid hydroxylase activity|response to organic substance|response to organic cyclic compound|integral component of membrane|oxidoreductase activity, acting on paired donors, with incorporation or reduction of molecular oxygen, reduced flavin …	rno00140,rno04726	Steroid hormone biosynthesis|Serotonergic synapse
Tbx3	38.90737624	15.05818494	62.75656754	4.167605047	2.059218564	0.040425243	0.858346236	0.192078244	0.762959627	353305	T-box transcription factor 3	GO:0000122,GO:0000978,GO:0000981,GO:0001216,GO:0001227,GO:0001501,GO:0001568,GO:0001701,GO:0001708,GO:0001947,GO:0003007,GO:0003151,GO:0003167,GO:0003205,GO:0003272,GO:0003677,GO:0003700,GO:0005634,GO:0005667,GO:0006355,GO:0006357,GO:0007417,GO:0007569,GO:0008284,GO:0008595,GO:0009887,GO:0010159,GO:0019827,GO:0021761,GO:0030539,GO:0030540,GO:0030857,GO:0030879,GO:0032275,GO:0035050,GO:0035108,GO:…	negative regulation of transcription by RNA polymerase II|RNA polymerase II cis-regulatory region sequence-specific DNA binding|DNA-binding transcription factor activity, RNA polymerase II-specific|DNA-binding transcription activator activity|DNA-binding transcription repressor activity, RNA polymerase II-specific|skeletal system development|blood vessel development|in utero embryonic development…	rno04550	Signaling pathways regulating pluripotency of stem cells	T-box
Il1b	587.6029306	227.880532	947.3253291	4.157113908	2.055582279	1.46E-06	0.00032505	9.768918218	38.70572657	24494	interleukin 1 beta	GO:0000122,GO:0000165,GO:0000187,GO:0001660,GO:0001666,GO:0001934,GO:0002439,GO:0002526,GO:0005125,GO:0005149,GO:0005178,GO:0005576,GO:0005615,GO:0005764,GO:0005829,GO:0006954,GO:0006955,GO:0007204,GO:0007584,GO:0007611,GO:0007613,GO:0008284,GO:0008285,GO:0009408,GO:0009743,GO:0010193,GO:0010243,GO:0010332,GO:0010573,GO:0010575,GO:0010628,GO:0010629,GO:0010718,GO:0010829,GO:0010942,GO:0014050,GO:…	negative regulation of transcription by RNA polymerase II|MAPK cascade|activation of MAPK activity|fever generation|response to hypoxia|positive regulation of protein phosphorylation|chronic inflammatory response to antigenic stimulus|acute inflammatory response|cytokine activity|interleukin-1 receptor binding|integrin binding|extracellular region|extracellular space|lysosome|cytosol|inflammatory…	rno01523,rno04010,rno04060,rno04064,rno04217,rno04380,rno04620,rno04621,rno04623,rno04625,rno04640,rno04657,rno04659,rno04668,rno04750,rno04932,rno04933,rno04940,rno05010,rno05020,rno05022,rno05132,rno05133,rno05134,rno05135,rno05140,rno05142,rno05143,rno05144,rno05146,rno05152,rno05162,rno05163,rno05164,rno05168,rno05171,rno05321,rno05323,rno05332,rno05417,rno05418	Antifolate resistance|MAPK signaling pathway|Cytokine-cytokine receptor interaction|NF-kappa B signaling pathway|Necroptosis|Osteoclast differentiation|Toll-like receptor signaling pathway|NOD-like receptor signaling pathway|Cytosolic DNA-sensing pathway|C-type lectin receptor signaling pathway|Hematopoietic cell lineage|IL-17 signaling pathway|Th17 cell differentiation|TNF signaling pathway|Infl…
Ass1	958.7230161	372.4391074	1545.006925	4.148347727	2.05253683	5.09E-08	1.84E-05	12.73012547	50.33205506	25698	argininosuccinate synthase 1	GO:0000050,GO:0000052,GO:0000053,GO:0001822,GO:0001889,GO:0004055,GO:0005524,GO:0005634,GO:0005737,GO:0005739,GO:0005741,GO:0005764,GO:0005783,GO:0005829,GO:0006526,GO:0006531,GO:0006953,GO:0007494,GO:0007568,GO:0007584,GO:0007623,GO:0009636,GO:0010043,GO:0010046,GO:0014075,GO:0015643,GO:0016597,GO:0032355,GO:0032496,GO:0042493,GO:0042802,GO:0043005,GO:0043025,GO:0043200,GO:0043204,GO:0043434,GO:…	urea cycle|citrulline metabolic process|argininosuccinate metabolic process|kidney development|liver development|argininosuccinate synthase activity|ATP binding|nucleus|cytoplasm|mitochondrion|mitochondrial outer membrane|lysosome|endoplasmic reticulum|cytosol|arginine biosynthetic process|aspartate metabolic process|acute-phase response|midgut development|aging|response to nutrient|circadian rhy…	rno00220,rno00250,rno05418	Arginine biosynthesis|Alanine, aspartate and glutamate metabolism|Fluid shear stress and atherosclerosis
Hmcn2	15.4633369	6.023273975	24.90339982	4.134528817	2.047722925	0.112635054	1	0.021238623	0.083693015	686132		GO:0005576,GO:0005604,GO:0005938,GO:0030054	extracellular region|basement membrane|cell cortex|cell junction
Prkch	77.31668448	30.11636987	124.5169991	4.134528817	2.047722925	0.012890781	0.449782342	0.261835939	1.03179188	81749	protein kinase C, eta	GO:0004674,GO:0004698,GO:0004699,GO:0005524,GO:0005737,GO:0005829,GO:0005886,GO:0005911,GO:0006468,GO:0010744,GO:0016020,GO:0018105,GO:0019899,GO:0031267,GO:0034351,GO:0035556,GO:0045618,GO:0046872,GO:0050861,GO:0051092,GO:0060252,GO:0070528,GO:0106310,GO:0106311,GO:2000810	protein serine/threonine kinase activity|calcium-dependent protein kinase C activity|calcium-independent protein kinase C activity|ATP binding|cytoplasm|cytosol|plasma membrane|cell-cell junction|protein phosphorylation|positive regulation of macrophage derived foam cell differentiation|membrane|peptidyl-serine phosphorylation|enzyme binding|small GTPase binding|negative regulation of glial cell …	rno04270,rno04750	Vascular smooth muscle contraction|Inflammatory mediator regulation of TRP channels
Klhl30	100.2626558	39.15128083	161.3740308	4.121807189	2.04327702	0.007130295	0.308819824	0.71509908	2.809252123	316624
Cspg4b	210.0040896	82.31807765	337.6901015	4.102259323	2.036418694	0.000665865	0.055470713	0.545263696	2.131898477	294747	chondroitin sulfate proteoglycan 4B	GO:0016021	integral component of membrane
Ugt1a7c	307.2744659	120.4654795	494.0834524	4.101452586	2.036134951	0.000110391	0.012986561	2.997235069	11.71643066	154516	UDP glucuronosyltransferase 1 family, polypeptide A7C	GO:0001889,GO:0005789,GO:0006711,GO:0014070,GO:0015020,GO:0016020,GO:0016021,GO:0019439,GO:0046226,GO:0052695,GO:0052696,GO:0052697	liver development|endoplasmic reticulum membrane|estrogen catabolic process|response to organic cyclic compound|glucuronosyltransferase activity|membrane|integral component of membrane|aromatic compound catabolic process|coumarin catabolic process|cellular glucuronidation|flavonoid glucuronidation|xenobiotic glucuronidation	rno00040,rno00053,rno00140,rno00830,rno00860,rno00980,rno00982,rno00983,rno04976,rno05204	Pentose and glucuronate interconversions|Ascorbate and aldarate metabolism|Steroid hormone biosynthesis|Retinol metabolism|Porphyrin and chlorophyll metabolism|Metabolism of xenobiotics by cytochrome P450|Drug metabolism - cytochrome P450|Drug metabolism - other enzymes|Bile secretion|Chemical carcinogenesis
Sgk1	1259.028402	493.9084659	2024.148337	4.098225637	2.034999417	1.29E-08	5.73E-06	7.350471547	28.71097178	29517	serum/glucocorticoid regulated kinase 1	GO:0004672,GO:0004674,GO:0004712,GO:0005524,GO:0005634,GO:0005737,GO:0005739,GO:0005789,GO:0005829,GO:0005886,GO:0006468,GO:0006883,GO:0006915,GO:0006974,GO:0007019,GO:0007616,GO:0008542,GO:0015459,GO:0016607,GO:0018105,GO:0030307,GO:0031115,GO:0035091,GO:0035556,GO:0043005,GO:0043066,GO:0043402,GO:0043423,GO:0048156,GO:0048471,GO:0048812,GO:0050775,GO:0051726,GO:0106310,GO:0106311,GO:1904045	protein kinase activity|protein serine/threonine kinase activity|protein serine/threonine/tyrosine kinase activity|ATP binding|nucleus|cytoplasm|mitochondrion|endoplasmic reticulum membrane|cytosol|plasma membrane|protein phosphorylation|cellular sodium ion homeostasis|apoptotic process|cellular response to DNA damage stimulus|microtubule depolymerization|long-term memory|visual learning|potassiu…	rno04068,rno04150,rno04151,rno04960	FoxO signaling pathway|mTOR signaling pathway|PI3K-Akt signaling pathway|Aldosterone-regulated sodium reabsorption
Dab2	1624.175543	639.4709203	2608.880165	4.079747932	2.028480018	3.90E-09	1.89E-06	6.855913757	26.65848731	79128	DAB adaptor protein 2	GO:0000122,GO:0000904,GO:0001650,GO:0001701,GO:0001921,GO:0002092,GO:0005178,GO:0005515,GO:0005546,GO:0005634,GO:0005737,GO:0005886,GO:0005905,GO:0006897,GO:0006898,GO:0006907,GO:0006915,GO:0007257,GO:0007492,GO:0007588,GO:0008022,GO:0010718,GO:0010862,GO:0010977,GO:0015031,GO:0016055,GO:0016324,GO:0030099,GO:0030132,GO:0030136,GO:0030276,GO:0030308,GO:0030335,GO:0030511,GO:0030665,GO:0032091,GO:…	negative regulation of transcription by RNA polymerase II|cell morphogenesis involved in differentiation|fibrillar center|in utero embryonic development|positive regulation of receptor recycling|positive regulation of receptor internalization|integrin binding|protein binding|phosphatidylinositol-4,5-bisphosphate binding|nucleus|cytoplasm|plasma membrane|clathrin-coated pit|endocytosis|receptor-me…	rno04144	Endocytosis
Gpr183	53.37457714	21.08145891	85.66769537	4.06365118	2.022776568	0.027656405	0.699940681	0.366400659	1.41908854	679975	G protein-coupled receptor 183	GO:0002250,GO:0002312,GO:0002313,GO:0002407,GO:0004930,GO:0005886,GO:0006959,GO:0007186,GO:0008142,GO:0010818,GO:0016021,GO:0030316,GO:0030595,GO:0030890,GO:0036145,GO:0060326,GO:0061470,GO:0070374,GO:2000458	adaptive immune response|B cell activation involved in immune response|mature B cell differentiation involved in immune response|dendritic cell chemotaxis|G protein-coupled receptor activity|plasma membrane|humoral immune response|G protein-coupled receptor signaling pathway|oxysterol binding|T cell chemotaxis|integral component of membrane|osteoclast differentiation|leukocyte chemotaxis|positive…
Eng	267.8728932	106.4111736	429.3346129	4.034676045	2.01245284	0.000261376	0.02661297	2.075509178	7.981236019	497010	endoglin	GO:0000122,GO:0001525,GO:0001569,GO:0001570,GO:0001666,GO:0001837,GO:0001934,GO:0001937,GO:0001947,GO:0002040,GO:0003084,GO:0003148,GO:0003198,GO:0003203,GO:0003208,GO:0003209,GO:0003222,GO:0003273,GO:0005024,GO:0005114,GO:0005534,GO:0005539,GO:0005615,GO:0005886,GO:0006355,GO:0007179,GO:0007507,GO:0009897,GO:0009986,GO:0010628,GO:0010629,GO:0010665,GO:0010862,GO:0015026,GO:0016021,GO:0016477,GO:…	negative regulation of transcription by RNA polymerase II|angiogenesis|branching involved in blood vessel morphogenesis|vasculogenesis|response to hypoxia|epithelial to mesenchymal transition|positive regulation of protein phosphorylation|negative regulation of endothelial cell proliferation|heart looping|sprouting angiogenesis|positive regulation of systemic arterial blood pressure|outflow tract…
Plscr1	207.0156816	82.31807765	331.7132856	4.029652964	2.010655598	0.000813462	0.064086828	2.75188277	10.56901224	117540	phospholipid scramblase 1	GO:0000287,GO:0001228,GO:0001618,GO:0003677,GO:0004518,GO:0005154,GO:0005509,GO:0005634,GO:0005654,GO:0005730,GO:0005737,GO:0005794,GO:0005829,GO:0005886,GO:0005887,GO:0006659,GO:0006915,GO:0006953,GO:0006955,GO:0008270,GO:0010288,GO:0010628,GO:0015914,GO:0017121,GO:0017124,GO:0017128,GO:0019899,GO:0030099,GO:0032091,GO:0032791,GO:0033003,GO:0035455,GO:0035456,GO:0042609,GO:0043065,GO:0045071,GO:…	magnesium ion binding|DNA-binding transcription activator activity, RNA polymerase II-specific|virus receptor activity|DNA binding|nuclease activity|epidermal growth factor receptor binding|calcium ion binding|nucleus|nucleoplasm|nucleolus|cytoplasm|Golgi apparatus|cytosol|plasma membrane|integral component of plasma membrane|phosphatidylserine biosynthetic process|apoptotic process|acute-phase r…
C5ar1	602.5914285	239.92708	965.2557769	4.023121429	2.008315283	2.03E-06	0.00042601	3.681539787	14.11657907	113959	complement C5a receptor 1	GO:0001774,GO:0001856,GO:0002430,GO:0004875,GO:0004878,GO:0004930,GO:0005886,GO:0006915,GO:0006954,GO:0007200,GO:0007204,GO:0009986,GO:0010575,GO:0010759,GO:0016021,GO:0016323,GO:0021534,GO:0030593,GO:0031100,GO:0031410,GO:0032494,GO:0032496,GO:0038178,GO:0042789,GO:0043524,GO:0045177,GO:0045766,GO:0048143,GO:0050679,GO:0050830,GO:0050890,GO:0070374,GO:0090023,GO:0097242,GO:0099172,GO:1902947	microglial cell activation|complement component C5a binding|complement receptor mediated signaling pathway|complement receptor activity|complement component C5a receptor activity|G protein-coupled receptor activity|plasma membrane|apoptotic process|inflammatory response|phospholipase C-activating G protein-coupled receptor signaling pathway|positive regulation of cytosolic calcium ion concentrati…	rno04080,rno04610,rno04613,rno05150,rno05171	Neuroactive ligand-receptor interaction|Complement and coagulation cascades|Neutrophil extracellular trap formation|Staphylococcus aureus infection|Coronavirus disease - COVID-19
Lyc2	133.1893446	53.20558678	213.1731024	4.006592453	2.002375768	0.003834162	0.196342936	1.915038501	7.312897799	688047	lysozyme C type 2	GO:0003796,GO:0005576,GO:0019835,GO:0050829,GO:0050830	lysozyme activity|extracellular region|cytolysis|defense response to Gram-negative bacterium|defense response to Gram-positive bacterium
Ppp1r17	67.84177805	27.10473289	108.5788232	4.005899031	2.002126058	0.019206907	0.573604545	0.520911479	1.988844149	266705	protein phosphatase 1, regulatory subunit 17	GO:0004864,GO:0004865,GO:0010921,GO:0019212,GO:0032515	protein phosphatase inhibitor activity|protein serine/threonine phosphatase inhibitor activity|regulation of phosphatase activity|phosphatase inhibitor activity|negative regulation of phosphoprotein phosphatase activity	rno04730	Long-term depression
Adh7	24.94211483	10.03878996	39.84543971	3.969147664	1.988829236	0.077190124	1	0.279386536	1.056913769	171178	alcohol dehydrogenase 7 (class IV), mu or sigma polypeptide	GO:0001523,GO:0004022,GO:0004024,GO:0004031,GO:0004745,GO:0005829,GO:0005886,GO:0006067,GO:0006068,GO:0006069,GO:0008270,GO:0009617,GO:0010430,GO:0019841,GO:0035276,GO:0042572,GO:0042573,GO:0042802,GO:0045471,GO:0048019,GO:0050153,GO:0051287,GO:2000272	retinoid metabolic process|alcohol dehydrogenase (NAD+) activity|alcohol dehydrogenase activity, zinc-dependent|aldehyde oxidase activity|NAD-retinol dehydrogenase activity|cytosol|plasma membrane|ethanol metabolic process|ethanol catabolic process|ethanol oxidation|zinc ion binding|response to bacterium|fatty acid omega-oxidation|retinol binding|ethanol binding|retinol metabolic process|retinoic…	rno00010,rno00071,rno00350,rno00620,rno00830,rno00980,rno00982,rno05204	Glycolysis / Gluconeogenesis|Fatty acid degradation|Tyrosine metabolism|Pyruvate metabolism|Retinol metabolism|Metabolism of xenobiotics by cytochrome P450|Drug metabolism - cytochrome P450|Chemical carcinogenesis
Adtrp	2.494211483	1.003878996	3.984543971	3.969147664	1.988829236	0.542777628	1	0.045166002	0.170862098	361228	androgen-dependent TFPI-regulating protein	GO:0001934,GO:0002042,GO:0002686,GO:0003332,GO:0005901,GO:0009986,GO:0010628,GO:0016020,GO:0016021,GO:0016787,GO:0030195,GO:0042758,GO:0043491,GO:0050709,GO:0071383,GO:0140052,GO:1903038,GO:2000402	positive regulation of protein phosphorylation|cell migration involved in sprouting angiogenesis|negative regulation of leukocyte migration|negative regulation of extracellular matrix constituent secretion|caveola|cell surface|positive regulation of gene expression|membrane|integral component of membrane|hydrolase activity|negative regulation of blood coagulation|long-chain fatty acid catabolic p…
Atoh7	2.494211483	1.003878996	3.984543971	3.969147664	1.988829236	0.542777628	1	0.125661855	0.475376326	365564	atonal bHLH transcription factor 7	GO:0000978,GO:0000981,GO:0003407,GO:0005634,GO:0006357,GO:0007623,GO:0009649,GO:0021554,GO:0030182,GO:0043153,GO:0046983,GO:1990837	RNA polymerase II cis-regulatory region sequence-specific DNA binding|DNA-binding transcription factor activity, RNA polymerase II-specific|neural retina development|nucleus|regulation of transcription by RNA polymerase II|circadian rhythm|entrainment of circadian clock|optic nerve development|neuron differentiation|entrainment of circadian clock by photoperiod|protein dimerization activity|seque…			bHLH
Avpr1a	4.988422967	2.007757992	7.969087942	3.969147664	1.988829236	0.334765301	1	0.070861949	0.268069357	25107	arginine vasopressin receptor 1A	GO:0001992,GO:0002125,GO:0003084,GO:0004930,GO:0005000,GO:0005768,GO:0005886,GO:0005887,GO:0007186,GO:0007204,GO:0007621,GO:0007625,GO:0008284,GO:0010033,GO:0010035,GO:0010460,GO:0014049,GO:0014902,GO:0016021,GO:0017046,GO:0019722,GO:0021537,GO:0030139,GO:0030307,GO:0030659,GO:0031394,GO:0031410,GO:0031894,GO:0032849,GO:0035176,GO:0035810,GO:0035815,GO:0042277,GO:0042631,GO:0042711,GO:0042713,GO:…	regulation of systemic arterial blood pressure by vasopressin|maternal aggressive behavior|positive regulation of systemic arterial blood pressure|G protein-coupled receptor activity|vasopressin receptor activity|endosome|plasma membrane|integral component of plasma membrane|G protein-coupled receptor signaling pathway|positive regulation of cytosolic calcium ion concentration|negative regulation…	rno04020,rno04072,rno04080,rno04270	Calcium signaling pathway|Phospholipase D signaling pathway|Neuroactive ligand-receptor interaction|Vascular smooth muscle contraction
Bglap	2.494211483	1.003878996	3.984543971	3.969147664	1.988829236	0.542777628	1	0.116114651	0.439259439	25295	bone gamma-carboxyglutamate protein	GO:0001503,GO:0001649,GO:0002076,GO:0005509,GO:0005576,GO:0005615,GO:0005737,GO:0005791,GO:0005794,GO:0007568,GO:0007569,GO:0008147,GO:0009612,GO:0009629,GO:0010035,GO:0010043,GO:0014070,GO:0014823,GO:0030425,GO:0030500,GO:0031214,GO:0031667,GO:0031982,GO:0032571,GO:0033280,GO:0033574,GO:0033594,GO:0042476,GO:0042493,GO:0042995,GO:0043204,GO:0043627,GO:0045471,GO:0046848,GO:0046914,GO:0048306,GO:…	ossification|osteoblast differentiation|osteoblast development|calcium ion binding|extracellular region|extracellular space|cytoplasm|rough endoplasmic reticulum|Golgi apparatus|aging|cell aging|structural constituent of bone|response to mechanical stimulus|response to gravity|response to inorganic substance|response to zinc ion|response to organic cyclic compound|response to activity|dendrite|re…	rno04928	Parathyroid hormone synthesis, secretion and action
C6	2.494211483	1.003878996	3.984543971	3.969147664	1.988829236	0.542777628	1	0.017654647	0.066787183	24237	complement C6	GO:0001701,GO:0001970,GO:0005576,GO:0005579,GO:0005615,GO:0006958,GO:0019835,GO:0043065,GO:0045087,GO:0045766,GO:0045917	in utero embryonic development|positive regulation of activation of membrane attack complex|extracellular region|membrane attack complex|extracellular space|complement activation, classical pathway|cytolysis|positive regulation of apoptotic process|innate immune response|positive regulation of angiogenesis|positive regulation of complement activation	rno04610,rno05020,rno05171,rno05322	Complement and coagulation cascades|Prion disease|Coronavirus disease - COVID-19|Systemic lupus erythematosus
Calhm6	2.494211483	1.003878996	3.984543971	3.969147664	1.988829236	0.542777628	1	0.04955989	0.18748409	294430	calcium homeostasis modulator family member 6	GO:0005261,GO:0005887,GO:0098655	cation channel activity|integral component of plasma membrane|cation transmembrane transport
Chrna3	2.494211483	1.003878996	3.984543971	3.969147664	1.988829236	0.542777628	1	0.037698557	0.142612898	25101	cholinergic receptor nicotinic alpha 3 subunit	GO:0005887,GO:0005892,GO:0006937,GO:0006940,GO:0007165,GO:0007171,GO:0007268,GO:0007271,GO:0007399,GO:0007507,GO:0007626,GO:0010035,GO:0014056,GO:0014069,GO:0015464,GO:0016020,GO:0022848,GO:0030425,GO:0030594,GO:0032991,GO:0034220,GO:0035094,GO:0035095,GO:0042166,GO:0042391,GO:0042493,GO:0043005,GO:0043025,GO:0044853,GO:0044877,GO:0045202,GO:0045211,GO:0048814,GO:0050877,GO:0060079,GO:0060084,GO:…	integral component of plasma membrane|acetylcholine-gated channel complex|regulation of muscle contraction|regulation of smooth muscle contraction|signal transduction|activation of transmembrane receptor protein tyrosine kinase activity|chemical synaptic transmission|synaptic transmission, cholinergic|nervous system development|heart development|locomotory behavior|response to inorganic substance…	rno04080,rno04725	Neuroactive ligand-receptor interaction|Cholinergic synapse
Cldn7	2.494211483	1.003878996	3.984543971	3.969147664	1.988829236	0.542777628	1	0.04157929	0.157293637	65132	claudin 7	GO:0005198,GO:0005886,GO:0005923,GO:0007155,GO:0007162,GO:0008284,GO:0016021,GO:0016323,GO:0016327,GO:0016328,GO:0016338,GO:0019904,GO:0031333,GO:0042802,GO:0043066,GO:0045471,GO:0050839,GO:0070830,GO:2000147	structural molecule activity|plasma membrane|bicellular tight junction|cell adhesion|negative regulation of cell adhesion|positive regulation of cell population proliferation|integral component of membrane|basolateral plasma membrane|apicolateral plasma membrane|lateral plasma membrane|calcium-independent cell-cell adhesion via plasma membrane cell-adhesion molecules|protein domain specific bindi…	rno04514,rno04530,rno04670,rno05160	Cell adhesion molecules|Tight junction|Leukocyte transendothelial migration|Hepatitis C
Erp27	2.494211483	1.003878996	3.984543971	3.969147664	1.988829236	0.542777628	1	0.023213397	0.087815824	297698	endoplasmic reticulum protein 27	GO:0003756,GO:0005783,GO:0006457,GO:0034976	protein disulfide isomerase activity|endoplasmic reticulum|protein folding|response to endoplasmic reticulum stress
Fcrla	4.988422967	2.007757992	7.969087942	3.969147664	1.988829236	0.334765301	1	0.078375378	0.296492511	304965	Fc receptor-like A	GO:0004888,GO:0005737,GO:0005887,GO:0007166,GO:0030154	transmembrane signaling receptor activity|cytoplasm|integral component of plasma membrane|cell surface receptor signaling pathway|cell differentiation
Gckr	4.988422967	2.007757992	7.969087942	3.969147664	1.988829236	0.334765301	1	0.040725844	0.154065068	25658	glucokinase regulator	GO:0001678,GO:0004857,GO:0005515,GO:0005634,GO:0005654,GO:0005737,GO:0005739,GO:0005829,GO:0006006,GO:0006606,GO:0009750,GO:0019899,GO:0019904,GO:0030246,GO:0033132,GO:0033133,GO:0034504,GO:0042593,GO:0046415,GO:0051594,GO:0070095,GO:0070328,GO:1901135,GO:1903300	cellular glucose homeostasis|enzyme inhibitor activity|protein binding|nucleus|nucleoplasm|cytoplasm|mitochondrion|cytosol|glucose metabolic process|protein import into nucleus|response to fructose|enzyme binding|protein domain specific binding|carbohydrate binding|negative regulation of glucokinase activity|positive regulation of glucokinase activity|protein localization to nucleus|glucose homeo…
[truncated: 16,600 more rows]
