# Supplementary material for: Comprehensive Bioinformatics Analysis Combined with Wet-Lab Experiments to Find Target Proteins of Chinese Medicine Monomer
Source: Molecules. 2022 Sep 19;27(18):6105. doi: 10.3390/molecules27186105 (PMC9504604; doi:10.3390/molecules27186105)
Supplement: Supplementary file 1 [file molecules-27-06105-s001.zip › Supplementary Table S3.xls]

## Sheet: sheet1
AccID	log2FC	FoldChange	FDR	Normalized_QTcell-DT	Normalized_QTcell-DMSO	QTcell-DT	QTcell-DMSO	Strand	KeggID	Description	E-Value	Blast_Symbol	Blast_Description
Emp3	4.07942	16.9055	0	752.407	44.4972	744	45	-	rno:81505	epithelial membrane protein 3	3e-82	Emp3	Epithelial membrane protein 3
C3	14.2526	19519.1	0	195.181	0	193	0	+	rno:24232	complement component 3	0	C3	Complement component 3d
Oas1b	3.79855	13.9148	0	179	12.8547	177	13	-	rno:246268	2-5 oligoadenylate synthetase 1B	3e-137	Oas1a	2'-5'-oligoadenylate synthase 1A
Oas1a	13.5428	11934.3	0	119.333	0	118	0	+	rno:192281	2'-5' oligoadenylate synthetase 1A	0	Oas1a	2'-5'-oligoadenylate synthase 1A
Lcn2	13.2601	9810.61	0	98.0961	0	97	0	-	rno:170496	lipocalin 2	2e-92	Lcn2	Neutrophil gelatinase-associated lipocalin
Hk3	2.70977	6.54217	0	1319.75	201.721	1305	204	+	rno:25060	hexokinase 3 (white cell)	0	Hk3	Hexokinase-3
Akr1b8	3.50458	11.3497	0	449.017	39.5531	444	40	+	rno:286921	aldo-keto reductase family 1, member B8	4e-171	Akr1b8	Aldose reductase-related protein 2
Lpl	2.50444	5.6743	0	1391.55	245.229	1376	248	-	rno:24539	lipoprotein lipase	0	Lpl	Lipoprotein lipase
Cxcl16	2.86392	7.27989	0	849.492	116.682	840	118	-	rno:497942	chemokine (C-X-C motif) ligand 16
Ch25h	4.8833	29.5134	0	262.938	8.89944	260	9	-	rno:309527	cholesterol 25-hydroxylase	1e-152	Ch25h	Cholesterol 25-hydroxylase
Atp2a3	5.58974	48.1591	0	286.198	5.93296	283	6	+	rno:25391	ATPase, Ca++ transporting, ubiquitous	0	Atp2a1	Sarcoplasmic/endoplasmic reticulum calcium ATPase 1
Mx1	13.1032	8799.31	0	87.9831	0	87	0	-	rno:24575	myxovirus (influenza virus) resistance 1	2e-63	Dnm2	Dynamin-2
Ctsk	3.59475	12.0817	0	262.938	21.7542	260	22	+	rno:29175	cathepsin K	0	Ctsk	Cathepsin K, isoform CRA_a
Slc6a12	3.84633	14.3834	0	640.153	44.4972	633	45	+	rno:50676	solute carrier family 6 (neurotransmitter transporter), member 12	0	Slc6a12	Sodium- and chloride-dependent betaine transporter
LOC103694876	3.01067	8.0594	0	271.028	33.6201	268	34	+		SWI/SNF-related matrix-associated actin-dependent regulator of chromatin subfamily B member 1	0	Smarcb1	SWI/SNF-related matrix-associated actin-dependent regulator of chromatin subfamily B member 1
Arhgap22	2.9696	7.83317	0	410.588	52.4078	406	53	+	rno:306279	Rho GTPase activating protein 22	0	Arhgap22	Rho GTPase activating protein 22
Alox12	3.30489	9.88262	0	234.622	23.7318	232	24	-	rno:287454	arachidonate 12-lipoxygenase	7e-154	Alox5	Arachidonate 5-lipoxygenase, isoform CRA_a
Lyz2	3.54387	11.663	0	2710.28	232.374	2680	235	-	rno:25211	lysozyme 2	1e-69	Lyz2	Lysozyme C-2
Spp1	3.35725	10.2478	0	25647.6	2502.72	25361	2531	-	rno:25353	secreted phosphoprotein 1	3e-117	Spp1	Osteopontin
Slamf9	3.87783	14.7009	0	189.113	12.8547	187	13	-	rno:289235	SLAM family member 9	6e-116	Slamf9	CD84-H1
Il1rn	5.26905	38.5605	0	305.413	7.91061	302	8	+	rno:60582	interleukin 1 receptor antagonist	3e-82	Il1rn	Interleukin-1 receptor antagonist protein
Dok2	2.43637	5.41277	0	529.921	97.8938	524	99	+	rno:290361	docking protein 2	0	Dok2	Docking protein 2
Bhlhe41	2.63936	6.23057	0	665.435	106.793	658	108	-	rno:117095	basic helix-loop-helix family, member e41	1e-179	Bhlhe41	Class E basic helix-loop-helix protein 41
Anpep	2.97141	7.843	0	1008.27	128.547	997	130	-	rno:81641	alanyl (membrane) aminopeptidase	0	Anpep	Aminopeptidase N
C5ar1	4.27459	19.3543	0	803.983	41.5307	795	42	-	rno:113959	complement component 5a receptor 1	4e-163	C5ar1	C5a anaphylatoxin chemotactic receptor 1
Usp18	13.0526	8495.92	0	84.9492	0	84	0	+	rno:312688	ubiquitin specific peptidase 18	0	Usp18	Ubiquitin carboxyl-terminal hydrolase
Alox5	12.964	7990.27	0	79.8927	0	79	0	-	rno:25290	arachidonate 5-lipoxygenase	0	Alox5	Arachidonate 5-lipoxygenase, isoform CRA_a
Msr1	13.3744	10619.6	0	106.186	0	105	0	-	rno:498638	macrophage scavenger receptor 1	0	Msr1	Macrophage scavenger receptor types I and II
Ptpn7	3.36701	10.3174	0	336.763	32.6313	333	33	+	rno:246781	protein tyrosine phosphatase, non-receptor type 7	0	Ptpn7	Protein-tyrosine-phosphatase
Anxa4	2.45819	5.49525	0	494.526	89.9832	489	91	-	rno:79124	annexin A4	1e-179	Anxa4	Annexin A4
Klhl30	2.50852	5.69035	0	568.35	99.8715	562	101	+	rno:316624	kelch-like family member 30	0	Klhl30	Kelch-like protein 30
Fxyd5	2.15404	4.45071	0	1500.77	337.19	1484	341	-	rno:60338	FXYD domain-containing ion transport regulator 5	3e-76	Fxyd5	FXYD domain-containing ion transport regulator 5, isoform CRA_c
P2ry2	13.0865	8698.18	0	86.9718	0	86	0	-	rno:29597	purinergic receptor P2Y, G-protein coupled, 2	0	P2ry2	P2Y purinoceptor 2
Myof	3.40241	10.5737	0	460.141	43.5084	455	44	-	rno:309499	myoferlin	0	Myof	Myof protein
S100a4	3.61181	12.2254	0	290.243	23.7318	287	24	+	rno:24615	S100 calcium-binding protein A4	2e-53	S100a4	Protein S100-A4
Irf7	13.8696	14968.2	0	149.672	0	148	0	-	rno:293624	interferon regulatory factor 7	0	Irf7	Interferon regulatory factor 7, isoform CRA_b
Cd14	4.08641	16.9876	0	2721.41	160.19	2691	162	-	rno:60350	CD14 molecule	1e-167	Cd14	Monocyte differentiation antigen CD14
Cd44	2.71895	6.58394	0	371.147	56.3631	367	57	-	rno:25406	Cd44 molecule	0	Cd44	CD44 antigen
Ccl4	3.81453	14.0698	0	236.644	16.81	234	17	+	rno:116637	chemokine (C-C motif) ligand 4	1e-35	Ccl4	C-C motif chemokine 4
Lgals9	3.55858	11.7825	0	221.475	18.7877	219	19	+	rno:25476	lectin, galactoside-binding, soluble, 9	5e-165	Lgals9	Galectin-9
Lgals3	2.28754	4.88224	0	12803.1	2622.37	12660	2652	+	rno:83781	lectin, galactoside-binding, soluble, 3	9e-129	Lgals3	Galectin-3
Itgax	3.60238	12.1458	0	204.283	16.81	202	17	+	rno:499271	integrin, alpha X	0	Itgax	Putative uncharacterized protein
Itgam	2.92184	7.5781	0	876.797	115.693	867	117	+	rno:25021	integrin, alpha M	0	Itgam	CD11b
Cass4	3.48381	11.1875	0	199.226	17.7989	197	18	+	rno:296409	Cas scaffolding protein family member 4	0	Cass4	Cas scaffolding protein family member 4
Plau	2.76019	6.77488	0	1802.14	265.994	1782	269	-	rno:25619	plasminogen activator, urokinase	0	Plau	Urokinase-type plasminogen activator
Plek	4.3196	19.9678	0	256.87	12.8547	254	13	-	rno:364206	pleckstrin	0	Plek	Pleckstrin
Fgr	2.64053	6.23559	1.11022e-16	314.514	50.4301	311	51	+	rno:79113	FGR proto-oncogene, Src family tyrosine kinase	0	Fgr	Tyrosine-protein kinase Fgr
Fcgr1a	2.62637	6.17469	1.11022e-16	317.548	51.419	314	52	-	rno:295279	Fc fragment of IgG, high affinity Ia, receptor (CD64)	4e-163	Fcgr1	High affinity immunoglobulin gamma Fc receptor I
Fermt3	2.08453	4.24137	2.22045e-16	1937.65	456.838	1916	462	-	rno:309186	fermitin family member 3	0	Fermt3	Putative uncharacterized protein
Sfrp5	12.9082	7686.88	2.22045e-16	76.8588	0	76	0	-	rno:309377	secreted frizzled-related protein 5	0	Sfrp5	Secreted frizzled-related protein 5
Siglec1	4.4626	22.0483	2.22045e-16	109.22	4.94413	108	5	-	rno:311426	sialic acid binding Ig-like lectin 1, sialoadhesin	0	Siglec1	Sialoadhesin
Ccl2	3.83827	14.3032	4.44089e-16	127.424	8.89944	126	9	+	rno:24770	chemokine (C-C motif) ligand 2	1e-58	Ccl2	C-C motif chemokine 2
Anxa1	2.72398	6.60694	8.88178e-16	254.848	38.5642	252	39	-	rno:25380	annexin A1	0	Anxa1	Annexin A1
Tagln2	2.02775	4.07768	8.88178e-16	2503.98	614.061	2476	621	-	rno:304983	transgelin 2	7e-112	Tagln2	Transgelin-2
LOC100911959	4.35158	20.4153	3.44169e-15	101.13	4.94413	100	5	+		ubiquitin carboxyl-terminal hydrolase 5-like	0	Usp5	Ubiquitin carboxyl-terminal hydrolase 5
Fcrl2	1.96267	3.89782	4.21885e-15	3981.49	1021.46	3937	1033	-	rno:310694	Fc receptor-like 2	0	Fcrls	Protein Fcrls
LOC102553440	-6.25735	0.0130723	4.55191e-15	1.0113	78.1173	1	79	-		SET-binding protein-like
Ifi27	2.49402	5.63345	5.21805e-15	306.424	54.3855	303	55	+	rno:170512	interferon, alpha-inducible protein 27	5e-56	Ifi27	Interferon alpha-inducible protein 27-like protein 2A
Hbb	1.93253	3.81724	9.4369e-15	5586.42	1463.46	5524	1480	-	rno:24440	hemoglobin, beta	1e-70	Hbb-bs	Protein Hbb-bs
Fabp4	2.01357	4.03781	9.65894e-15	1309.63	324.335	1295	328	+	rno:79451	fatty acid binding protein 4, adipocyte	3e-67	Fabp4	Fatty acid-binding protein, adipocyte
Lgals3bp	2.07631	4.21726	1.54321e-14	809.04	191.832	800	194	-	rno:245955	lectin, galactoside-binding, soluble, 3 binding protein	0	Lgals3bp	Galectin-3-binding protein
Kcnn4	2.80958	7.01082	2.14273e-14	194.17	27.6871	192	28	+	rno:65206	potassium intermediate/small conductance calcium-activated channel, subfamily N, member 4	9e-98	Kcnn3	Small conductance calcium-activated potassium channel protein 3
Lrrc25	2.19191	4.5691	2.80886e-14	492.503	107.782	487	109	-	rno:498605	leucine rich repeat containing 25	6e-119	Lrrc25	Leucine-rich repeat-containing protein 25
Prodh2	6.16785	71.8967	4.18554e-14	71.8023	0.988826	71	1	+	rno:361538	proline dehydrogenase (oxidase) 2	0	Prodh2	Probable proline dehydrogenase 2
Itgb2	1.95818	3.88571	4.70735e-14	1379.41	354.989	1364	359	-	rno:309684	integrin, beta 2	0	Itgb2	Integrin beta-2
Lilrb4	12.6376	6372.19	6.01741e-14	63.7119	0	63	0	-	rno:292594	leukocyte immunoglobulin-like receptor, subfamily B, member 4	1e-133	Lilrb4	Leukocyte immunoglobulin-like receptor subfamily B member 4
Gpr183	2.68309	6.42229	7.9714e-14	203.271	31.6424	201	32	-	rno:679975	G protein-coupled receptor 183	0	Gpr183	G-protein coupled receptor 183
Psd4	2.41922	5.3488	1.13243e-13	275.074	51.419	272	52	+	rno:311785	pleckstrin and Sec7 domain containing 4	0	Psd4	PH and SEC7 domain-containing protein 4
Tpbgl	2.01842	4.0514	1.59317e-13	729.147	179.966	721	182	-	rno:681316	trophoblast glycoprotein-like	1e-165	Gm4980	Trophoblast glycoprotein-like
Smagp	2.83064	7.1139	1.9218e-13	168.887	23.7318	167	24	-	rno:300236	small cell adhesion glycoprotein
Csf2ra	1.96302	3.89877	1.94511e-13	944.554	242.262	934	245	+	rno:652957	colony stimulating factor 2 receptor, alpha, low-affinity (granulocyte-macrophage)	1e-107	Csf2ra	Granulocyte-macrophage colony-stimulating factor receptor alpha-chain deletion isoform
LOC100910990	3.41728	10.6832	2.43916e-13	116.299	10.8771	115	11	-		copine-1-like	0	Rbm12	RNA-binding protein 12
Ccdc88b	2.62428	6.16577	2.56684e-13	201.249	32.6313	199	33	-	rno:293698	coiled-coil domain containing 88B	0	Ccdc88b	Coiled-coil domain-containing protein 88B
Fmnl1	1.94518	3.85085	2.66454e-13	990.062	257.095	979	260	+	rno:287746	formin-like 1	0	Fmnl1	Formin-like protein 1
LOC102546864	2.61701	6.13479	3.15192e-13	200.237	32.6313	198	33	-		uncharacterized LOC102546864	4e-160	C130050O18Rik	Protein C130050O18Rik
Hba1	1.82797	3.55038	3.68816e-13	16560	4664.29	16375	4717	-	rno:25632	hemoglobin, alpha 1	2e-66	Hba-a2	Alpha globin 1
Slc25a34	-3.07532	0.118642	5.32907e-13	16.1808	136.458	16	138	-	rno:298606	solute carrier family 25, member 34	1e-151	Slc25a34	Solute carrier family 25 member 34
Susd3	2.8212	7.06749	5.3435e-13	160.797	22.743	159	23	+	rno:306810	sushi domain containing 3	2e-115	Susd3	Sushi domain-containing protein 3
Lgals1	1.86131	3.63337	5.85199e-13	1670.67	459.804	1652	465	+	rno:56646	lectin, galactoside-binding, soluble, 1	1e-73	Lgals1	Galectin-1
Slc1a5	2.57396	5.95441	6.57585e-13	200.237	33.6201	198	34	+	rno:292657	solute carrier family 1 (neutral amino acid transporter), member 5	0	Slc1a5	Neutral amino acid transporter B(0)
Spta1	-3.77305	0.0731476	8.36664e-13	7.0791	96.905	7	98	+	rno:289257	spectrin, alpha, erythrocytic 1	0	Spta1	Spectrin alpha chain, erythrocytic 1
Hba2	1.79581	3.47211	1.20393e-12	19480.7	5610.6	19263	5674	-	rno:360504	hemoglobin, alpha 2	5e-66	Hba-a2	Alpha globin 1
Cela1	3.42342	10.7288	1.60971e-12	106.186	9.88826	105	10	-	rno:24331	chymotrypsin-like elastase family, member 1	2e-129	Cela1	Putative uncharacterized protein
Aldh1a3	-12.4859	0.000174332	1.74905e-12	0	57.3519	0	58	-	rno:266603	aldehyde dehydrogenase 1 family, member A3	0	Aldh1a3	Aldehyde dehydrogenase family 1 member A3
Neu3	-12.4859	0.000174332	1.74905e-12	0	57.3519	0	58	-	rno:117185	sialidase 3 (membrane sialidase)	0	Neu3	Neuraminidase 3
Ctsz	1.7782	3.42997	1.93245e-12	6807.06	1984.57	6731	2007	-	rno:252929	cathepsin Z	5e-163	Ctsz	Cathepsin Z, isoform CRA_b
Anxa2	1.78658	3.44995	2.56428e-12	2787.14	807.871	2756	817	+	rno:56611	annexin A2	0	Anxa2	Annexin A2
Lcp1	1.78356	3.44276	2.66931e-12	2927.71	850.391	2895	860	+	rno:306071	lymphocyte cytosolic protein 1	0	Lcp1	Plastin-2
Pamr1	-12.4608	0.00017739	2.79377e-12	0	56.3631	0	57	+	rno:311252	peptidase domain containing associated with muscle regeneration 1	0	Pamr1	Inactive serine protease PAMR1
LOC100134871	1.79576	3.47198	2.81364e-12	2138.9	616.039	2115	623	+	rno:100134871	beta globin minor gene	5e-69	Hbb-bs	Protein Hbb-bs
Arhgap9	2.04562	4.12849	3.057e-12	440.927	106.793	436	108	+	rno:362893	Rho GTPase activating protein 9	0	Arhgap9	ArhGAP9
Adcy7	2.0606	4.1716	3.45091e-12	416.656	99.8715	412	101	-	rno:84420	adenylate cyclase 7	0	Adcy7	Adenylate cyclase type 7
Ncf4	2.01077	4.02998	4.29301e-12	470.254	116.682	465	118	+	rno:500904	neutrophil cytosolic factor 4	0	Ncf4	Neutrophil cytosol factor 4
Gmfg	1.94988	3.86344	6.43674e-12	550.147	142.391	544	144	-	rno:113940	glia maturation factor, gamma	4e-78	Gmfg	Glia maturation factor gamma
LOC103689971	3.13834	8.80512	7.35301e-12	113.266	12.8547	112	13	+		exocyst complex component 2-like	0	Exoc2	Exoc2 protein
Nek1	-3.55091	0.0853236	7.45037e-12	8.0904	94.9273	8	96	-	rno:290705	NIMA-related kinase 1	0	Nek1	Nek1 protein
Sst	1.83017	3.5558	8.05456e-12	988.04	277.86	977	281	+	rno:24797	somatostatin	5e-63	Sst	Somatostatin
Ly86	2.20749	4.61871	9.10805e-12	274.062	59.3296	271	60	-	rno:291359	lymphocyte antigen 86	2e-85	Ly86	Lymphocyte antigen 86
Plk3	1.98492	3.9584	1.07093e-11	454.074	114.704	449	116	-	rno:58936	polo-like kinase 3	0	Plk3	Serine/threonine-protein kinase PLK3
P2ry6	2.87302	7.32599	1.11178e-11	130.458	17.7989	129	18	-	rno:117264	pyrimidinergic receptor P2Y, G-protein coupled, 6	3e-179	P2ry6	Pyrimidinergic receptor P2Y, G-protein coupled, 6
Dhrs9	12.3608	5259.76	1.208e-11	52.5876	0	52	0	+	rno:170635	dehydrogenase/reductase (SDR family) member 9	2e-165	Dhrs9	Dehydrogenase/reductase (SDR family) member 9
Cd97	1.87652	3.67188	1.21555e-11	682.627	185.899	675	188	-	rno:361383	CD97 molecule	0	Cd97	CD97 antigen
Snx20	2.01028	4.02862	1.83105e-11	394.407	97.8938	390	99	+	rno:307742	sorting nexin 20	5e-140	Snx20	Sorting nexin-20
Cfd	-2.62702	0.161878	1.84198e-11	25.2825	156.235	25	158	-	rno:54249	complement factor D (adipsin)	1e-129	Cfd	Cfd protein
Ripk3	2.14943	4.43653	1.92935e-11	285.187	64.2737	282	65	-	rno:246240	receptor-interacting serine-threonine kinase 3	1e-173	Ripk3	Receptor-interacting serine/threonine-protein kinase 3
LOC100912569	4.97957	31.5501	2.96572e-11	62.7006	1.97765	62	2	-		uncharacterized LOC100912569
Cdkn1a	1.71721	3.288	3.57726e-11	2041.81	620.983	2019	628	+	rno:114851	cyclin-dependent kinase inhibitor 1A	3e-12	Cdkn1b	Cyclin-dependent kinase inhibitor 1B
A3galt2	2.07606	4.21655	4.57283e-11	304.401	72.1843	301	73	+	rno:171553	alpha 1,3-galactosyltransferase 2	4e-78	Ggta1	N-acetyllactosaminide alpha-1,3-galactosyltransferase
Ptprc	2.94486	7.70003	5.01551e-11	114.277	14.8324	113	15	-	rno:24699	protein tyrosine phosphatase, receptor type, C	0	Ptprc	Receptor-type tyrosine-protein phosphatase C
Tm4sf19	12.2751	4956.37	5.42512e-11	49.5537	0	49	0	-	rno:288044	transmembrane 4 L six family member 19	5e-86	Tm4sf19	Tm4sf19 protein
RT1-S3	2.14959	4.43701	5.5154e-11	258.893	58.3408	256	59	+	rno:294228	RT1 class Ib, locus S3	1e-117	Gm10499	predicted gene 10499
Znf471	-3.45781	0.0910112	5.7548e-11	8.0904	88.9944	8	90	-		zinc finger protein 471	0	Zfp81	Protein Zfp81
Cmtm7	1.87043	3.65642	6.42776e-11	527.898	144.369	522	146	-	rno:501065	CKLF-like MARVEL transmembrane domain containing 7	1e-62	Cmtm7	Putative uncharacterized protein
Gal	-12.2718	0.000202219	7.95825e-11	0	49.4413	0	50	-	rno:29141	galanin/GMAP prepropeptide	7e-61	Gal	Galanin peptides
Clec4a1	2.37854	5.20009	8.0672e-11	180.011	34.6089	178	35	-	rno:362430	C-type lectin domain family 4, member A1	1e-114	Clec4a1	Protein Clec4a1
Stab1	1.70268	3.25506	9.43184e-11	1532.12	470.681	1515	476	-	rno:100363145	stabilin 1	0	Stab1	Soluble form FELE-1
Arhgap27	1.91135	3.76161	9.91118e-11	427.78	113.715	423	115	-	rno:303583	Rho GTPase activating protein 27	0	Arhgap27	Rho GTPase-activating protein 27
Tf	1.96153	3.89476	1.1498e-10	362.045	92.9497	358	94	-	rno:24825	transferrin	0	Trf	Serotransferrin
Isg15	3.23275	9.4006	1.24113e-10	93.0396	9.88826	92	10	-	rno:298693	ISG15 ubiquitin-like modifier	3e-63	Isg15	ISG15 ubiquitin-like modifier
Cd83	1.96075	3.89265	1.28491e-10	358	91.9609	354	93	+	rno:361226	CD83 molecule	2e-57	Cd83	CD83 antigen
RT1-A2	1.90108	3.73494	1.33069e-10	424.746	113.715	420	115	+	rno:24974	RT1 class Ia, locus A2	4e-136	Gm10499	predicted gene 10499
Capg	1.63241	3.10029	2.34815e-10	6637.16	2140.81	6563	2165	+	rno:297339	capping protein (actin filament), gelsolin-like	0	Capg	Macrophage-capping protein
Dbil5	12.1839	4652.98	2.49927e-10	46.5198	0	46	0	+	rno:59116	diazepam binding inhibitor-like 5	5e-44	Dbil5	Diazepam-binding inhibitor-like 5
Slc37a2	1.70898	3.2693	2.54572e-10	986.017	301.592	975	305	-	rno:500973	solute carrier family 37 (glucose-6-phosphate transporter), member 2	0	Slc37a2	Sugar phosphate exchanger 2
Pcdhb4	-3.18354	0.110067	2.98228e-10	10.113	91.9609	10	93	+	rno:291655	protocadherin beta 4	0	Pcdhb4	Putative uncharacterized protein
Ptpn6	1.66043	3.16111	3.20711e-10	1547.29	489.469	1530	495	-	rno:116689	protein tyrosine phosphatase, non-receptor type 6	0	Ptpn6	Tyrosine-protein phosphatase non-receptor type 6
Cd48	2.23229	4.69878	3.21338e-10	195.181	41.5307	193	42	+	rno:245962	Cd48 molecule	2e-41	Cd48	CD48 antigen
Ptgds	-12.1825	0.000215124	3.47972e-10	0	46.4748	0	47	-	rno:25526	prostaglandin D2 synthase (brain)	1e-92	Ptgds	Prostaglandin-H2 D-isomerase
Ube2l6	2.38163	5.21124	3.88821e-10	159.785	30.6536	158	31	+	rno:295704	ubiquitin-conjugating enzyme E2L 6	1e-76	Ube2l6	Ubiquitin/ISG15-conjugating enzyme E2 L6
Rtp4	2.75158	6.73456	5.06152e-10	113.266	16.81	112	17	-	rno:360733	receptor (chemosensory) transporter protein 4	8e-87	Rtp4	Rtp4 protein
Fank1	-5.6541	0.0198585	6.40557e-10	1.0113	51.419	1	52	+	rno:309071	fibronectin type 3 and ankyrin repeat domains 1	2e-178	Fank1	Fibronectin type 3 and ankyrin repeat domains 1 protein
Lat2	2.23858	4.71932	6.77685e-10	182.034	38.5642	180	39	+	rno:317676	linker for activation of T cells family, member 2	2e-93	Lat2	Linker for activation of T-cells family member 2
Vit	-2.36409	0.19424	8.29701e-10	30.339	156.235	30	158	+	rno:313831	vitrin	0	Vit	Vitrin
Ndst3	-2.67963	0.156082	8.89481e-10	18.2034	116.682	18	118	-	rno:295430	N-deacetylase/N-sulfotransferase (heparan glucosaminyl) 3	0	Ndst1	Bifunctional heparan sulfate N-deacetylase/N-sulfotransferase 1
Pcp4	1.80946	3.50511	1.04404e-09	429.802	122.614	425	124	+	rno:25510	Purkinje cell protein 4	2e-29	Pcp4	Purkinje cell protein 4
Nr4a1	1.96563	3.90584	1.04759e-09	278.107	71.1955	275	72	+	rno:79240	nuclear receptor subfamily 4, group A, member 1	0	Nr4a1	Nuclear receptor subfamily 4 group A member 1
Fam206a	-2.59925	0.165024	1.08945e-09	20.226	122.614	20	124	+	rno:298018	family with sequence similarity 206, member A	2e-101	Fam206a	Protein Simiate
Slc15a3	1.81544	3.51967	1.09722e-09	417.667	118.659	413	120	+	rno:246239	solute carrier family 15 (oligopeptide transporter), member 3	0	Slc15a3	Solute carrier family 15 member 3
LOC103693683	1.78885	3.45539	1.24364e-09	451.04	130.525	446	132	-		low affinity immunoglobulin gamma Fc region receptor III	8e-116	Fcgr3	Low affinity immunoglobulin gamma Fc region receptor III
Gsta1	-2.28916	0.204594	1.44095e-09	33.3729	163.156	33	165	-	rno:24421	glutathione S-transferase alpha 1	2e-112	Gsta3	Glutathione S-transferase A3
Pcdh17	-2.17961	0.220735	1.47176e-09	41.4633	187.877	41	190	+	rno:306055	protocadherin 17	0	Pcdh17	Protein Pcdh17
Plekhf1	2.58025	5.98044	1.90907e-09	118.322	19.7765	117	20	-	rno:308543	pleckstrin homology domain containing, family F (with FYVE domain) member 1	7e-151	Plekhf1	Pleckstrin homology domain-containing family F member 1
Dab2	1.6301	3.09535	1.93175e-09	1034.56	334.223	1023	338	+	rno:79128	disabled 2, mitogen-responsive phosphoprotein	7e-157	Dab2	Disabled homolog 2
LOC691414	12.0527	4248.46	1.99636e-09	42.4746	0	42	0	+	rno:691414	hypothetical protein LOC691414	8e-45	Gm8050	Protein Gm8050
Mmp9	12.0527	4248.46	1.99636e-09	42.4746	0	42	0	+	rno:81687	matrix metallopeptidase 9	0	Mmp9	Matrix metalloproteinase-9
Anxa11	1.6324	3.10028	2.14658e-09	974.893	314.447	964	318	-	rno:290527	annexin A11	0	Anxa11	Annexin A11
Dach1	-2.78871	0.144715	4.13721e-09	14.1582	97.8938	14	99	-		dachshund family transcription factor 1	4e-166	Dach1	Putative uncharacterized protein
Vof16	-3.05379	0.120426	4.23105e-09	10.113	84.0502	10	85	+		ischemia related factor vof-16
Hcls1	1.56855	2.96606	4.40081e-09	1557.4	525.067	1540	531	-	rno:288077	hematopoietic cell specific Lyn substrate 1	0	Hcls1	Hematopoietic lineage cell-specific protein
Itgal	1.5921	3.01489	4.74425e-09	1088.16	360.922	1076	365	+	rno:308995	integrin, alpha L	0	Itgal	Itgal protein
Smtnl2	-2.56452	0.169045	4.9211e-09	19.2147	113.715	19	115	-	rno:679629	smoothelin-like 2	0	Smtnl2	Smoothelin-like protein 2
Cklf	11.9824	4046.2	5.74638e-09	40.452	0	40	0	-	rno:245978	chemokine-like factor	1e-36	Cklf	Chemokine-like factor
Cd84	2.01165	4.03244	6.04009e-09	211.362	52.4078	209	53	+	rno:501872	CD84 molecule	3e-140	Cd84	CD84 antigen
Epha3	-1.74318	0.29871	6.15428e-09	126.412	423.218	125	428	-	rno:29210	Eph receptor A3	0	Epha3	Receptor protein-tyrosine kinase
Grin3a	-11.9856	0.000246598	7.17975e-09	0	40.5419	0	41	-	rno:191573	glutamate receptor, ionotropic, N-methyl-D-aspartate 3A	0	Grin3a	Protein Grin3a
Dlec1	-11.9856	0.000246598	7.17975e-09	0	40.5419	0	41	+	rno:501070	deleted in lung and esophageal cancer 1	0	Dlec1	Deleted in lung and esophageal cancer protein 1 homolog
LOC691422	-1.99385	0.251067	7.32677e-09	54.6102	217.542	54	220	-		similar to zinc finger protein 101	0	Zfp101	Protein Zfp101
Dync2h1	-1.91738	0.264735	7.56703e-09	66.7458	252.151	66	255	-	rno:65209	dynein cytoplasmic 2 heavy chain 1	0	Dync2h1	Cytoplasmic dynein 2 heavy chain 1
Rab11fip2	-2.65333	0.158953	9.09398e-09	16.1808	101.849	16	103	-	rno:308003	RAB11 family interacting protein 2 (class I)	4e-63	Rab11fip1	Rab11 family-interacting protein 1
Lpxn	1.76929	3.40886	9.20693e-09	353.955	103.827	350	105	+	rno:293783	leupaxin	4e-163	Lpxn	Lpxn protein
Anxa5	1.53266	2.89319	9.51616e-09	1839.55	635.815	1819	643	-	rno:25673	annexin A5	3e-180	Anxa5	Annexin A5
Rrad	2.53875	5.81084	9.79141e-09	109.22	18.7877	108	19	+	rno:83521	Ras-related associated with diabetes	1e-157	Rrad	GTP-binding protein RAD
Tgfb1	1.54068	2.90931	9.94676e-09	1518.97	522.1	1502	528	+	rno:59086	transforming growth factor, beta 1	0	Tgfb1	Transforming growth factor beta-1
Fcer1g	1.52664	2.88114	1.02676e-08	1994.28	692.179	1972	700	-	rno:25441	Fc fragment of IgE, high affinity I, receptor for; gamma polypeptide	1e-41	Fcer1g	High affinity immunoglobulin epsilon receptor subunit gamma
LOC103693189	-5.47726	0.0224481	1.10544e-08	1.0113	45.486	1	46	+		protein tyrosine phosphatase type IVA 1	1e-101	Ptp4a1	Protein tyrosine phosphatase 4a1, isoform CRA_a
RT1-T24-3	2.92939	7.61788	1.24062e-08	82.9266	10.8771	82	11	+	rno:414788	RT1 class I, locus T24, gene 3	6e-78	Gm10499	predicted gene 10499
Slc25a24	2.56226	5.90633	1.28038e-08	105.175	17.7989	104	18	+	rno:310791	solute carrier family 25 (mitochondrial carrier, phosphate carrier), member 24	1e-173	Slc25a25	Calcium-binding mitochondrial carrier protein SCaMC-2
LOC684327	-2.39771	0.189765	1.28755e-08	23.2599	122.614	23	124	-	rno:684327	similar to inter-alpha (globulin) inhibitor H5	0	Itih5	Inter-alpha-trypsin inhibitor heavy chain H5
S100a6	11.9084	3843.94	1.67501e-08	38.4294	0	38	0	+	rno:85247	S100 calcium binding protein A6	5e-46	S100a6	Protein S100-A6
Surf1	-5.44556	0.0229468	1.7918e-08	1.0113	44.4972	1	45	-	rno:64463	surfeit 1	4e-161	Surf1	Surfeit locus protein 1
Tmem81	-11.9134	0.00025924	2.01622e-08	0	38.5642	0	39	+	rno:498229	transmembrane protein 81	9e-106	Tmem81	Transmembrane protein 81
LOC100911585	-11.9134	0.00025924	2.01622e-08	0	38.5642	0	39	+		leucine-rich repeat-containing protein 23-like	1e-166	Lrrc23	Leucine-rich repeat-containing protein 23
Rfx8	-11.9134	0.00025924	2.01622e-08	0	38.5642	0	39	-	rno:501127	RFX family member 8, lacking RFX DNA binding domain	0	Rfx8	DNA-binding protein RFX8
Tbc1d4	-2.23849	0.211908	2.22204e-08	29.3277	138.436	29	140	-		TBC1 domain family, member 4	0	Tbc1d4	TBC1 domain family member 4
Scn3a	-1.6007	0.329716	2.42771e-08	208.328	631.86	206	639	-	rno:497770	sodium channel, voltage-gated, type III, alpha subunit	0	Scn3a	Sodium channel protein
LOC287167	2.82145	7.06875	2.63696e-08	83.9379	11.8659	83	12	-	rno:287167	globin, alpha	2e-63	Hba-a2	Alpha globin 1
Parvg	1.64209	3.12117	2.76755e-08	475.311	152.279	470	154	+	rno:689069	parvin, gamma	1e-148	Parvg	Gamma-parvin
Ehd4	1.52882	2.8855	2.83633e-08	1038.6	359.933	1027	364	-	rno:192204	EH-domain containing 4	0	Ehd4	EH-domain containing 4-KJR
Fosb	11.8699	3742.81	2.87355e-08	37.4181	0	37	0	-	rno:100360880	FBJ osteosarcoma oncogene B	0	Fosb	FBJ osteosarcoma oncogene B
Ccnd1	1.50008	2.82859	2.92463e-08	1552.35	548.799	1535	555	-	rno:58919	cyclin D1	1e-173	Ccnd1	Putative cyclin D1b
LOC102551963	2.55896	5.89281	3.04136e-08	99.1074	16.81	98	17	-		uncharacterized LOC102551963
Tnfsf13b	3.26759	9.63039	3.13967e-08	66.7458	6.92179	66	7	-	rno:498666	tumor necrosis factor (ligand) superfamily, member 13b	1e-78	Tnfsf13b	Tumor necrosis factor (Ligand) superfamily, member 13b, isoform CRA_a
S100a11	1.65913	3.15826	3.36679e-08	424.746	134.48	420	136	+	rno:445415	S100 calcium binding protein A11	4e-50	S100a11	Protein S100-A11
Rmrp	-2.08875	0.235085	3.82339e-08	37.4181	159.201	37	161	-		RNA component of mitochondrial RNA processing endoribonuclease
Synm	-1.61801	0.325785	3.88251e-08	166.864	512.212	165	518	-	rno:308709	synemin, intermediate filament protein	0	Synm	Synm protein
Uba7	2.54416	5.83269	4.08969e-08	98.0961	16.81	97	17	+	rno:301000	ubiquitin-like modifier activating enzyme 7	0	Uba7	Protein Uba7
Cd302	2.31734	4.98412	4.64628e-08	118.322	23.7318	117	24	-	rno:295629	CD302 molecule	1e-118	Cd302	CD302 antigen
Tmem119	1.67717	3.198	4.70187e-08	373.17	116.682	369	118	+	rno:304581	transmembrane protein 119	5e-116	Tmem119	Transmembrane protein 119
Ypel2	-1.99976	0.250042	4.72636e-08	44.4972	177.989	44	180	-	rno:360590	yippee-like 2 (Drosophila)	8e-67	Ypel1	Protein yippee-like 1
Sowahc	-1.60556	0.328608	4.82015e-08	170.91	520.123	169	526	+	rno:503306	sosondowah ankyrin repeat domain family member C	0	Sowahc	Ankyrin repeat domain-containing protein SOWAHC
Mfsd4	-2.61448	0.163291	4.94226e-08	15.1695	92.9497	15	94	-	rno:498228	major facilitator superfamily domain containing 4	0	Mfsd4	Mfsd4 transcript variant c
Ppip5k2	-1.85871	0.275724	5.32329e-08	62.7006	227.43	62	230	+	rno:501194	diphosphoinositol pentakisphosphate kinase 2	0	Ppip5k2	Inositol hexakisphosphate and diphosphoinositol-pentakisphosphate kinase 2
Oasl	3.376	10.3819	5.72399e-08	61.6893	5.93296	61	6	-	rno:304545	2'-5'-oligoadenylate synthetase-like	0	Oasl1	2'-5'-oligoadenylate synthase-like protein 1
Plcxd3	-11.8375	0.00027325	5.73182e-08	0	36.5866	0	37	+	rno:310358	phosphatidylinositol-specific phospholipase C, X domain containing 3	0	Plcxd3	Plcxd3 protein
Vkorc1l1	5.3758	41.522	6.10128e-08	41.4633	0.988826	41	1	-	rno:399684	vitamin K epoxide reductase complex, subunit 1-like 1	6e-33	Vkorc1l1	Vitamin K epoxide reductase complex, subunit 1-like 1
Adamtsl5	3.22321	9.3386	6.84421e-08	64.7232	6.92179	64	7	+	rno:314626	ADAMTS-like 5	8e-50	Adamts6	Protein Adamts6
Gpnmb	1.46728	2.765	7.10967e-08	37481.8	13555.8	37063	13709	+	rno:113955	glycoprotein (transmembrane) nmb	0	Gpnmb	Putative uncharacterized protein
Fam129a	2.76835	6.81328	7.2045e-08	80.904	11.8659	80	12	+	rno:63912	family with sequence similarity 129, member A	0	Fam129a	Protein Niban
Ptgs1	1.84624	3.59562	7.48837e-08	220.463	61.3072	218	62	+	rno:24693	prostaglandin-endoperoxide synthase 1	0	Ptgs1	Prostaglandin G/H synthase 1
Catsper2	-4.05058	0.0603468	7.7763e-08	3.0339	50.4301	3	51	-	rno:366174	cation channel, sperm associated 2	0	Catsper2	Cation channel sperm-associated protein 2
Sp140	2.81978	7.06054	9.76409e-08	76.8588	10.8771	76	11	+	rno:316580	SP140 nuclear body protein	0	Sp140	Protein Sp140
Fam78a	1.95818	3.88572	1.0421e-07	172.932	44.4972	171	45	-	rno:499776	family with sequence similarity 78, member A	2e-168	Fam78a	Family with sequence similarity 78, member A
LOC102553715	1.76164	3.39083	1.09824e-07	254.848	75.1508	252	76	+		microfibril-associated glycoprotein 4-like	7e-150	Mfap4	Microfibril-associated glycoprotein 4
Tfr2	-3.71917	0.0759306	1.19753e-07	4.0452	53.3966	4	54	-	rno:288562	transferrin receptor 2	0	Tfr2	Transferrin receptor protein 2
Lyn	1.50522	2.83868	1.25225e-07	738.249	260.061	730	263	+	rno:81515	LYN proto-oncogene, Src family tyrosine kinase	0	Lyn	Tyrosine-protein kinase Lyn
Tbxas1	1.68507	3.21556	1.27977e-07	308.446	95.9162	305	97	+	rno:24886	thromboxane A synthase 1, platelet	0	Tbxas1	Thromboxane-A synthase
Naaa	1.61731	3.06802	1.33958e-07	388.339	126.57	384	128	+	rno:497009	N-acylethanolamine acid amidase	0	Naaa	N-acylethanolamine-hydrolyzing acid amidase
Hck	1.52802	2.8839	1.41811e-07	601.723	208.642	595	211	+	rno:25734	hemopoietic cell kinase	0	Hck	Non-specific protein-tyrosine kinase
Crlf2	1.56189	2.9524	1.46228e-07	490.48	166.123	485	168	-	rno:171499	cytokine receptor-like factor 2	9e-86	Crlf2	Crlf2 protein
Tmem132b	-1.61047	0.327491	1.47921e-07	131.469	401.464	130	406	-	rno:304458	transmembrane protein 132B	0	Tmem132b	Protein Tmem132b
Clec12a	11.7479	3439.42	1.4798e-07	34.3842	0	34	0	+	rno:680338	C-type lectin domain family 12, member A	2e-95	Clec12a	C-type lectin domain family 12 member A
Nufip2	-2.25251	0.209859	1.54713e-07	24.2712	115.693	24	117	-		nuclear fragile X mental retardation protein interacting protein 2	0	Nufip2	Nuclear fragile X mental retardation-interacting protein 2
Mfsd12	1.41801	2.67217	1.66711e-07	2681.97	1003.66	2652	1015	-	rno:362824	major facilitator superfamily domain containing 12	0	Mfsd12	Major facilitator superfamily domain-containing protein 12
Mapk13	2.43169	5.39526	1.74205e-07	96.0735	17.7989	95	18	+	rno:29513	mitogen activated protein kinase 13	3e-129	Mapk11	Mitogen-activated protein kinase 11
Spi1	1.44584	2.72422	1.77243e-07	1217.6	446.95	1204	452	+	rno:366126	Spi-1 proto-oncogene	7e-148	Spi1	Transcription factor PU.1
Cyth4	1.44703	2.72646	1.77564e-07	1194.35	438.05	1181	443	+	rno:500906	cytohesin 4	0	Cyth4	Cyth4 protein
Ankrd63	2.20191	4.60087	1.92006e-07	118.322	25.7095	117	26	-	rno:691770	ankyrin repeat domain 63	0	Ankrd63	Ankyrin repeat domain-containing protein 63
Trpc6	2.1554	4.45492	2.14493e-07	123.379	27.6871	122	28	+	rno:89823	transient receptor potential cation channel, subfamily C, member 6	0	Trpc6	Putative uncharacterized protein
Fhl3	1.55513	2.9386	2.26458e-07	459.13	156.235	454	158	+	rno:313582	four and a half LIM domains 3	4e-158	Fhl3	Four and a half LIM domains protein 3
F8	-1.66329	0.315719	2.26733e-07	97.0848	307.525	96	311	-	rno:302470	coagulation factor VIII, procoagulant component	0	F8	Coagulation factor VIII
Ifi47	2.11384	4.32842	2.35861e-07	128.435	29.6648	127	30	+	rno:246208	interferon gamma inducible protein 47	5e-93	9930111J21Rik1	Protein 9930111J21Rik1
Dock8	1.5279	2.88365	2.42582e-07	521.831	180.955	516	183	+	rno:499337	dedicator of cytokinesis 8	0	Dock8	Dedicator of cytokinesis 8
Clec5a	11.7049	3338.29	2.57267e-07	33.3729	0	33	0	-	rno:679787	C-type lectin domain family 5, member A	2e-94	Clec5a	C-type lectin domain family 5 member A
Hvcn1	1.45173	2.73536	2.71267e-07	906.125	331.257	896	335	-	rno:304485	hydrogen voltage-gated channel 1	6e-118	Hvcn1	Voltage-gated hydrogen channel 1
Sntb1	-4.42023	0.0467067	2.75175e-07	2.0226	43.5084	2	44	-	rno:299940	syntrophin, beta 1	0	Sntb1	Beta-1-syntrophin
Zfp819	-11.7155	0.000297353	2.8132e-07	0	33.6201	0	34	+	rno:308561	zinc finger protein 819	0	Zfp819	Protein Zfp819
Emr1	1.63621	3.10847	3.21234e-07	310.469	99.8715	307	101	-	rno:316137	EGF-like module containing, mucin-like, hormone receptor-like 1	0	Emr1	Emr1
Wbp1	3.13011	8.75503	3.29083e-07	60.678	6.92179	60	7	-	rno:297381	WW domain binding protein 1	3e-151	Wbp1	WW domain-binding protein 1
Glipr1	1.93447	3.82237	3.35656e-07	158.774	41.5307	157	42	-	rno:299783	GLI pathogenesis-related 1	1e-97	Glipr1	Glioma pathogenesis-related protein 1
LOC103694855	2.51705	5.72409	3.59212e-07	84.9492	14.8324	84	15	-		hemoglobin subunit beta-2-like	1e-64	Hbb-bs	Protein Hbb-bs
Ciart	3.25264	9.53108	4.38017e-07	56.6328	5.93296	56	6	-	rno:365871	circadian associated repressor of transcription	0	Ciart	Gene model 129, (NCBI)
Lrrk1	1.86509	3.64291	4.41137e-07	172.932	47.4637	171	48	-	rno:308703	leucine-rich repeat kinase 1	0	Lrrk1	Leucine-rich repeat serine/threonine-protein kinase 1
LOC688459	11.6605	3237.16	4.48803e-07	32.3616	0	32	0	+	rno:688459	hypothetical protein LOC688459	3e-67	9130008F23Rik	9130008F23Rik protein
Vgll3	11.6605	3237.16	4.48803e-07	32.3616	0	32	0	+	rno:498038	vestigial-like family member 3	6e-162	Vgll3	Transcription cofactor vestigial-like protein 3
Rasal3	1.83163	3.55938	4.56842e-07	183.045	51.419	181	52	-	rno:314596	RAS protein activator like 3	0	Rasal3	RAS protein activator-like-3
Ikzf1	1.96412	3.90174	4.65373e-07	146.638	37.5754	145	38	+	rno:305501	IKAROS family zinc finger 1	0	Ikzf1	DNA-binding protein Ikaros
Cc2d2a	-1.85813	0.275833	4.75606e-07	48.5424	176.011	48	178	-		coiled-coil and C2 domain containing 2A	0	Cc2d2a	Coiled-coil and C2 domain-containing protein 2A
Oasl2	1.94641	3.85416	5.24708e-07	148.661	38.5642	147	39	-	rno:304549	2'-5' oligoadenylate synthetase-like 2	0	Oasl2	2'-5'-oligoadenylate synthase-like protein 2
Gpr84	1.83957	3.57902	5.36557e-07	176.977	49.4413	175	50	-	rno:688730	G protein-coupled receptor 84	0	Gpr84	G-protein coupled receptor 84
Fam126b	-3.08916	0.117508	5.40028e-07	7.0791	60.3184	7	61	-	rno:316415	family with sequence similarity 126, member B	0	Fam126b	Protein FAM126B
LOC100361018	-2.04646	0.242078	5.8853e-07	31.3503	129.536	31	131	+	rno:100361018	rCG22048-like	3e-62	Gm17455	predicted gene, 17455
Nfatc2	2.40369	5.29156	5.98322e-07	88.9944	16.81	88	17	-	rno:311658	nuclear factor of activated T-cells, cytoplasmic, calcineurin-dependent 2	0	Nfatc2	Nuclear factor of-activated T-cells, cytoplasmic 2
Pnp	1.36497	2.57571	6.2976e-07	4480.06	1739.35	4430	1759	+	rno:290029	purine nucleoside phosphorylase	8e-153	Pnp	Purine nucleoside phosphorylase
Ctdspl2	-1.92151	0.263978	6.35439e-07	40.452	153.268	40	155	+	rno:311368	CTD (carboxy-terminal domain, RNA polymerase II, polypeptide A) small phosphatase like 2	0	Ctdspl2	CTD small phosphatase-like protein 2
Alox5ap	2.08095	4.23085	6.55091e-07	121.356	28.676	120	29	-	rno:29624	arachidonate 5-lipoxygenase activating protein	8e-88	Alox5ap	Arachidonate 5-lipoxygenase-activating protein
Myo1g	1.66399	3.16892	6.74304e-07	253.836	80.0949	251	81	-	rno:289785	myosin IG	0	Myo1g	Unconventional myosin-Ig
Agt	-1.92983	0.262459	6.75828e-07	39.4407	150.302	39	152	-	rno:24179	angiotensinogen (serpin peptidase inhibitor, clade A, member 8)	0	Agt	Angiotensinogen
Kras	-1.53815	0.344326	7.08035e-07	136.525	396.519	135	401	-	rno:24525	Kirsten rat sarcoma viral oncogene	3e-88	Nras	GTPase NRas
Myo9a	-1.8474	0.277893	7.15125e-07	47.5311	171.067	47	173	+	rno:171296	myosin IXA	0	Myo9a	Unconventional myosin-IXa
Cytip	2.1563	4.45769	7.30606e-07	110.232	24.7207	109	25	-	rno:311047	cytohesin 1 interacting protein	0	Cytip	Putative uncharacterized protein
Shq1	1.92665	3.80172	7.88804e-07	146.638	38.5642	145	39	-	rno:297483	SHQ1, H/ACA ribonucleoprotein assembly factor	0	Shq1	Protein SHQ1 homolog
LOC103690502	-1.60597	0.328514	8.0947e-07	98.0961	298.626	97	302	-		Friend virus susceptibility protein 1-like	7e-23	2410002F23Rik	Protein 2410002F23Rik
Slco4a1	1.5129	2.85384	8.45853e-07	417.667	146.346	413	148	+	rno:171144	solute carrier organic anion transporter family, member 4a1	0	Slco4a1	Solute carrier organic anion transporter family member 4A1
LOC103693389	4.34743	20.3567	9.12592e-07	40.452	1.97765	40	2	+		breakpoint cluster region protein-like	4e-12	Bcr	Bcr protein
Arhgdib	1.40538	2.64888	9.71067e-07	843.424	318.402	834	322	-	rno:362456	Rho, GDP dissociation inhibitor (GDI) beta	7e-111	Arhgdib	Rho GDP-dissociation inhibitor 2
Stat6	1.47087	2.77188	9.91018e-07	501.605	180.955	496	183	+	rno:362896	signal transducer and activator of transcription 6, interleukin-4 induced	0	Stat6	Signal transducer and transcription activator 6
LOC100909505	2.23947	4.72223	1.04084e-06	98.0961	20.7654	97	21	+		N-acetylglucosamine-6-sulfatase-like	0	Gns	Putative uncharacterized protein
Snap25	-1.71562	0.304472	1.04813e-06	64.7232	212.598	64	215	+	rno:25012	synaptosomal-associated protein 25	2e-117	Snap25	Synaptosomal-associated protein 25
LOC100910973	1.92376	3.79411	1.06406e-06	142.593	37.5754	141	38	-		uncharacterized LOC100910973
Tmem173	1.90005	3.73226	1.07699e-06	147.65	39.5531	146	40	-	rno:498840	transmembrane protein 173	0	Tmem173	Stimulator of interferon genes protein
Zfp386	-2.08265	0.23608	1.18655e-06	27.3051	115.693	27	117	+	rno:25165	zinc finger protein 386 (Kruppel-like)	5e-144	D3Ertd254e	Protein D3Ertd254e
Gpr123	-1.48392	0.357516	1.29979e-06	159.785	446.95	158	452	+	rno:309097	G protein-coupled receptor 123	0	Gpr123	Gpr123 protein
Cdc73	-2.43495	0.18493	1.34304e-06	15.1695	82.0726	15	83	-	rno:304832	cell division cycle 73	0	Cdc73	Parafibromin
Atg9b	11.5674	3034.9	1.38021e-06	30.339	0	30	0	+	rno:499973	autophagy related 9B	0	Atg9b	Autophagy-related protein 9B
Alpk1	-2.6568	0.158571	1.4165e-06	11.1243	70.2067	11	71	-	rno:310879	alpha-kinase 1	0	Alpk1	Alpha-protein kinase 1
Prkaa2	-1.44614	0.367001	1.42998e-06	199.226	542.866	197	549	-	rno:78975	protein kinase, AMP-activated, alpha 2 catalytic subunit	0	Prkaa2	AMP-activated protein kinase alpha-2 variant B
Lmna	1.33904	2.52983	1.43452e-06	2371.5	937.407	2345	948	-	rno:60374	lamin A/C	0	Lmna	Prelamin-A/C
LOC100911299	-2.07027	0.238115	1.5019e-06	27.3051	114.704	27	116	-		uncharacterized LOC100911299
Suv39h2	-1.76303	0.294629	1.57393e-06	53.5989	181.944	53	184	+	rno:364785	suppressor of variegation 3-9 homolog 2 (Drosophila)	0	Suv39h2	Histone-lysine N-methyltransferase SUV39H2
Dusp27	3.03059	8.17146	1.6053e-06	56.6328	6.92179	56	7	-	rno:498267	dual specificity phosphatase 27 (putative)	0	Dusp27	Inactive dual specificity phosphatase 27
Wdfy4	1.45883	2.74885	1.62924e-06	470.254	171.067	465	173	-		WDFY family member 4	0	Wdfy4	Protein Wdfy4
Itga4	2.73162	6.64202	1.63411e-06	65.7345	9.88826	65	10	+	rno:311144	integrin, alpha 4	0	Itga4	Integrin alpha-4
LOC102551327	3.55265	11.7342	1.75639e-06	46.5198	3.95531	46	4	+		uncharacterized LOC102551327
Reck	-1.65834	0.316805	1.93254e-06	70.791	223.475	70	226	+	rno:313488	reversion-inducing-cysteine-rich protein with kazal motifs	0	Reck	Reck protein
Gpr135	-2.57145	0.168235	1.96931e-06	12.1356	72.1843	12	73	-	rno:314213	G protein-coupled receptor 135	0	Gpr135	G protein-coupled receptor 135
Skap2	1.47916	2.78786	1.98713e-06	402.497	144.369	398	146	-	rno:155183	src kinase associated phosphoprotein 2	0	Skap2	Src kinase-associated phosphoprotein 2
Cebpb	1.49374	2.81618	2.06092e-06	373.17	132.503	369	134	+	rno:24253	CCAAT/enhancer binding protein (C/EBP), beta	4e-96	Cebpb	NF-IL6
RGD1561157	3.32258	10.0045	2.06329e-06	49.5537	4.94413	49	5	+	rno:360487	RGD1561157
Lsp1	1.73268	3.32344	2.07484e-06	184.057	55.3743	182	56	+	rno:361680	lymphocyte-specific protein 1	7e-145	Lsp1	Lymphocyte-specific protein 1
Ythdc2	-3.1354	0.113802	2.24827e-06	6.0678	53.3966	6	54	-	rno:307446	YTH domain containing 2	3e-96	Dhx36	Dhx36 protein
Tgfbr2	1.34236	2.53566	2.34166e-06	1213.56	478.592	1200	484	-	rno:81810	transforming growth factor, beta receptor 2	0	Tgfbr2	TGF-beta receptor type-2
Tp53inp1	-1.65333	0.317906	2.36732e-06	69.7797	219.519	69	222	+	rno:297822	tumor protein p53 inducible nuclear protein 1	5e-129	Trp53inp1	Transformation related protein 53 inducible nuclear protein 1
Slc9a2	-11.535	0.000336986	2.45651e-06	0	29.6648	0	30	+	rno:24783	solute carrier family 9, subfamily A (NHE2, cation proton antiporter 2), member 2	0	Slc9a2	Sodium/hydrogen exchanger
LOC100912964	-11.535	0.000336986	2.45651e-06	0	29.6648	0	30	+		zinc finger protein 567-like	1e-104	Zfp74	Mszf77
Kif6	-11.535	0.000336986	2.45651e-06	0	29.6648	0	30	-	rno:171291	kinesin family member 6	0	Kif6	Kinesin-like protein KIF21B
Zc3h6	-1.88713	0.270345	2.55707e-06	37.4181	138.436	37	140	+	rno:311415	zinc finger CCCH type containing 6	0	Zc3h6	Zinc finger CCCH domain-containing protein 6
LOC102554909	-2.44479	0.183672	2.56606e-06	14.1582	77.1285	14	78	-		uncharacterized LOC102554909
Epb41l4b	-4.24624	0.0526932	2.94458e-06	2.0226	38.5642	2	39	-	rno:500464	erythrocyte membrane protein band 4.1 like 4B	0	Epb4.1l4b	Band 4.1-like protein 4B
Stard5	1.81537	3.51949	3.15233e-06	149.672	42.5195	148	43	+	rno:502348	StAR-related lipid transfer (START) domain containing 5	1e-121	Stard5	StAR-related lipid transfer (START) domain containing 5, isoform CRA_a
Tipinl1	1.68761	3.22122	3.19112e-06	191.136	59.3296	189	60	-	rno:100359731	TIMELESS interacting protein like 1	7e-134	Tipin	TIMELESS-interacting protein
Galnt6	1.43423	2.70237	3.46192e-06	440.927	163.156	436	165	-	rno:100361647	polypeptide N-acetylgalactosaminyltransferase 6	0	Galnt6	Polypeptide N-acetylgalactosaminyltransferase 6
Ppap2c	1.75735	3.38077	3.4984e-06	163.831	48.4525	162	49	+	rno:246115	phosphatidic acid phosphatase type 2c	2e-121	Ppap2c	Lipid phosphate phosphohydrolase 2
Mgp	1.35432	2.55677	3.52019e-06	803.983	314.447	795	318	-	rno:25333	matrix Gla protein	2e-41	Mgp	Matrix Gla protein
Pomc	-3.4879	0.0891331	3.68621e-06	4.0452	45.486	4	46	+	rno:24664	proopiomelanocortin	6e-124	Pomc	Pro-opiomelanocortin
Pter	4.23498	18.8303	4.03435e-06	37.4181	1.97765	37	2	+	rno:63852	phosphotriesterase related	0	Pter	Phosphotriesterase-related protein
Pstpip1	1.73484	3.32842	4.04088e-06	167.876	50.4301	166	51	+	rno:300732	proline-serine-threonine phosphatase-interacting protein 1	0	Pstpip1	Proline-serine-threonine phosphatase-interacting protein 1
Slc16a3	2.16313	4.47884	4.13259e-06	93.0396	20.7654	92	21	+	rno:80878	solute carrier family 16 (monocarboxylate transporter), member 3	0	Slc16a3	Monocarboxylate transporter 4
Pcdh10	-1.34195	0.394487	4.14414e-06	354.966	899.832	351	910	+	rno:361943	protocadherin 10	0	Pcdh10	Protein Pcdh10
Zfp867	-2.32442	0.199655	4.23432e-06	16.1808	81.0838	16	82	-	rno:100125361	zinc finger protein 867	0	Zfp867	Protein Zfp867
RGD1560314	-11.4861	0.000348603	4.25868e-06	0	28.676	0	29	-	rno:362846	RGD1560314	3e-147	Zfp101	Protein Zfp101
LOC100361640	-5.04127	0.0303686	4.2697e-06	1.0113	33.6201	1	34	-		hypothetical LOC100361640
Cfb	11.4679	2832.64	4.30557e-06	28.3164	0	28	0	-	rno:294257	complement factor B	3e-19	Svep1	Sushi, von Willebrand factor type A, EGF and pentraxin domain-containing protein 1
Upp1	11.4679	2832.64	4.30557e-06	28.3164	0	28	0	+	rno:289801	uridine phosphorylase 1	2e-180	Upp1	Uridine phosphorylase 1
Kif27	-3.25781	0.104545	4.43006e-06	5.0565	48.4525	5	49	+	rno:246209	kinesin family member 27	0	Kif27	Kinesin-like protein KIF27
Socs3	1.43123	2.69676	4.47663e-06	418.678	155.246	414	157	-	rno:89829	suppressor of cytokine signaling 3	1e-128	Socs3	Suppressor of cytokine signaling 3
Map2k4	1.57015	2.96937	4.56178e-06	243.723	82.0726	241	83	-	rno:287398	mitogen activated protein kinase kinase 4	6e-168	Map2k4	Dual-specificity mitogen-activated protein kinase kinase 4
Ms4a6b	2.18566	4.54934	4.64664e-06	90.0057	19.7765	89	20	+	rno:293749	membrane-spanning 4-domains, subfamily A, member 6B-like	1e-108	Ms4a6b	Membrane-spanning 4-domains subfamily A member 6B
Sdf2l1	1.35983	2.56655	4.82069e-06	662.401	258.084	655	261	+	rno:680945	stromal cell-derived factor 2-like 1	2e-116	Sdf2l1	Stromal cell-derived factor 2-like protein 1
Tlk1	-3.08096	0.118178	4.98833e-06	6.0678	51.419	6	52	-	rno:311118	tousled-like kinase 1	0	Tlk1	Tlk1 protein
Cryl1	1.62429	3.08291	5.04141e-06	207.316	67.2402	205	68	-	rno:290277	crystallin, lambda 1	7e-167	Cryl1	Crystallin, lamda 1, isoform CRA_a
Zc3h12a	1.85611	3.62029	5.09937e-06	132.48	36.5866	131	37	-	rno:313587	zinc finger CCCH type containing 12A	0	Zc3h12a	Ribonuclease ZC3H12A
Tmem159	-2.93981	0.130325	5.36076e-06	7.0791	54.3855	7	55	+	rno:378467	transmembrane protein 159	4e-81	Tmem159	Promethin
Eng	1.31632	2.49029	5.37264e-06	1041.64	418.274	1030	423	+	rno:497010	endoglin	0	Eng	S-endoglin
Ccnt2	-1.40723	0.377036	5.39993e-06	175.966	466.726	174	472	+	rno:304758	cyclin T2	0	Ccnt2	Protein Ccnt2
LOC103690188	-2.57316	0.168036	5.45534e-06	11.1243	66.2514	11	67	+		uncharacterized LOC103690188
LOC308990	1.6952	3.23822	5.85005e-06	172.932	53.3966	171	54	+	rno:308990	hypothetical protein LOC308990	6e-110	AI467606	Transmembrane protein C16orf54 homolog
Vav1	1.34306	2.53689	5.92869e-06	709.932	279.838	702	283	-	rno:25156	vav 1 guanine nucleotide exchange factor	0	Vav1	Proto-oncogene vav
Fes	1.65675	3.15305	6.01318e-06	187.09	59.3296	185	60	-	rno:361597	FES proto-oncogene, tyrosine kinase	0	Fes	Tyrosine-protein kinase Fes/Fps
Steap3	2.06171	4.1748	6.38867e-06	99.1074	23.7318	98	24	-	rno:170824	STEAP family member 3, metalloreductase	0	Steap3	Metalloreductase STEAP3
Selplg	1.63218	3.09981	6.39792e-06	196.192	63.2849	194	64	+	rno:363930	selectin P ligand	1e-174	Selplg	Selectin, platelet (P-selectin) ligand, isoform CRA_b
Tmem63a	1.71928	3.29272	6.40289e-06	162.819	49.4413	161	50	+	rno:289318	transmembrane protein 63a	0	Tmem63a	CSC1-like protein 1
Ranbp2	-1.64401	0.319965	6.55831e-06	61.6893	192.821	61	195	+	rno:294429	RAN binding protein 2	0	Ranbp2	Putative uncharacterized protein
Serping1	1.49301	2.81476	6.67428e-06	292.266	103.827	289	105	-	rno:295703	serpin peptidase inhibitor, clade G (C1 inhibitor), member 1	0	Serping1	Plasma protease C1 inhibitor
Zfp420	3.45538	10.9691	6.77833e-06	43.4859	3.95531	43	4	+	rno:100359464	zinc finger protein 420	0	Zfp420	Mszf70
Emp1	1.54688	2.92185	6.97306e-06	242.712	83.0614	240	84	+	rno:25314	epithelial membrane protein 1	2e-76	Emp1	Epithelial membrane protein 1
Pigzl1	-4.99822	0.0312886	7.12702e-06	1.0113	32.6313	1	33	-	rno:303872	phosphatidylinositol glycan, class Z-like 1	0	Pigz	GPI mannosyltransferase 4
LOC102552880	-4.99822	0.0312886	7.12702e-06	1.0113	32.6313	1	33	-		uncharacterized LOC102552880
RGD1566401	-1.28004	0.411785	7.16429e-06	928.373	2254.52	918	2280	+		similar to GTL2, imprinted maternally expressed untranslated
Dnajc22	1.87538	3.66899	7.37953e-06	123.379	33.6201	122	34	+	rno:362998	DnaJ (Hsp40) homolog, subfamily C, member 22	1e-177	Dnajc22	DnaJ homolog subfamily C member 22
Hipk4	-11.4355	0.000361048	7.40864e-06	0	27.6871	0	28	+	rno:308449	homeodomain interacting protein kinase 4	0	Hipk4	Homeodomain-interacting protein kinase 4
Henmt1	-11.4355	0.000361048	7.40864e-06	0	27.6871	0	28	+	rno:100363095	HEN1 methyltransferase homolog 1 (Arabidopsis)	0	Henmt1	Small RNA 2'-O-methyltransferase
Scube2	-11.4355	0.000361048	7.40864e-06	0	27.6871	0	28	-		signal peptide, CUB domain, EGF-like 2	0	Scube2	Signal peptide, CUB and EGF-like domain-containing protein 2
Ghrh	-11.4355	0.000361048	7.40864e-06	0	27.6871	0	28	-	rno:29446	growth hormone releasing hormone	2e-38	Ghrh	Somatoliberin
Mir124-1	-11.4355	0.000361048	7.40864e-06	0	27.6871	0	28	+	rno:100314291	microRNA 124-1
Atp8b3	-3.05295	0.120495	7.43926e-06	6.0678	50.4301	6	51	+	rno:299616	ATPase, aminophospholipid transporter, class I, type 8B, member 3	0	Atp8b3	Atp8b3 protein
Pld4	1.29045	2.44604	7.5676e-06	1284.35	525.067	1270	531	+	rno:362792	phospholipase D family, member 4	0	Pld4	Phospholipase D4
Mtif2	-2.2888	0.204646	7.65403e-06	16.1808	79.1061	16	80	+	rno:305606	mitochondrial translational initiation factor 2	0	Mtif2	Translation initiation factor IF-2, mitochondrial
Atf3	1.47498	2.7798	7.85397e-06	302.379	108.771	299	110	-	rno:25389	activating transcription factor 3	2e-102	Atf3	Activating transcription factor 3
Lamp5	3.06003	8.3399	7.88639e-06	49.5537	5.93296	49	6	+	rno:362220	lysosomal-associated membrane protein family, member 5	1e-145	Lamp5	Lysosome-associated membrane glycoprotein 5
Hmha1	1.34073	2.53279	7.92104e-06	641.164	253.14	634	256	-	rno:314618	histocompatibility (minor) HA-1	0	Hmha1	Minor histocompatibility protein HA-1
Fam175a	-2.79894	0.143693	8.07193e-06	8.0904	56.3631	8	57	+	rno:289468	family with sequence similarity 175, member A	2e-55	Fam175b	BRISC complex subunit Abro1
LOC102556194	-2.79894	0.143693	8.07193e-06	8.0904	56.3631	8	57	-		uncharacterized LOC102556194
Dgkb	-2.32671	0.199338	8.26991e-06	15.1695	76.1396	15	77	+	rno:54248	diacylglycerol kinase, beta	0	Dgkb	Putative uncharacterized protein
Enpp6	-1.82394	0.282449	8.54023e-06	37.4181	132.503	37	134	-	rno:306460	ectonucleotide pyrophosphatase/phosphodiesterase 6	0	Enpp6	Ectonucleotide pyrophosphatase/phosphodiesterase family member 6
Mx2	1.357	2.56152	8.72986e-06	542.057	211.609	536	214	+	rno:286918	myxovirus (influenza virus) resistance 2	8e-62	Dnm2	Dynamin-2
Cd22	-3.42378	0.0931836	8.79209e-06	4.0452	43.5084	4	44	-	rno:308501	CD22 molecule	2e-37	Siglec1	Sialoadhesin
Vamp8	1.33316	2.51953	9.0181e-06	650.266	258.084	643	261	-	rno:83730	vesicle-associated membrane protein 8	2e-52	Vamp8	Vesicle-associated membrane protein 8
Psmb8	1.46339	2.75755	9.26194e-06	305.413	110.749	302	112	+	rno:24968	proteasome (prosome, macropain) subunit, beta type, 8	2e-87	Psmb5	Proteasome subunit beta type-5
Mbd5	-1.35821	0.390066	9.3083e-06	211.362	541.877	209	548	+		methyl-CpG binding domain protein 5
Mdm4	-1.35496	0.390945	9.75615e-06	213.384	545.832	211	552	-	rno:304798	MDM4, p53 regulator	0	Mdm4	Protein Mdm4
Dnm1l	-1.29843	0.406569	1.00219e-05	390.362	960.15	386	971	+	rno:114114	dynamin 1-like	0	Dnm1l	Dynamin-1-like protein
Scg2	1.48264	2.7946	1.01236e-05	279.119	99.8715	276	101	-	rno:24765	secretogranin II	0	Scg2	Secretogranin-2
Pik3r6	2.27963	4.85552	1.01547e-05	76.8588	15.8212	76	16	+	rno:497932	phosphoinositide-3-kinase, regulatory subunit 6	0	Pik3r6	Phosphoinositide 3-kinase regulatory subunit 6
Grn	1.27358	2.41761	1.01848e-05	14735.6	6095.13	14571	6164	+	rno:29143	granulin	0	Grn	Granulins
LOC103691641	-3.1977	0.108992	1.01873e-05	5.0565	46.4748	5	47	+		uncharacterized LOC103691641
Zfp39	-1.52386	0.347754	1.01976e-05	85.9605	247.207	85	250	-	rno:303173	zinc finger protein 39	0	Zfp39	Zinc finger protein 39
Tgfb2	-1.30347	0.405151	1.04622e-05	352.944	871.156	349	881	-	rno:81809	transforming growth factor, beta 2	3e-161	Tgfb2	Transforming growth factor beta-2
Igf2bp1	-1.57259	0.336205	1.05739e-05	71.8023	213.587	71	216	-	rno:303477	insulin-like growth factor 2 mRNA binding protein 1	0	Igf2bp1	Insulin-like growth factor 2 mRNA-binding protein 1
RGD1310209	-1.70434	0.306862	1.07827e-05	48.5424	158.212	48	160	-		similar to KIAA1324 protein
Postn	-3.02439	0.122905	1.11027e-05	6.0678	49.4413	6	50	+	rno:361945	periostin, osteoblast specific factor	0	Postn	Periostin
Hace1	-1.41712	0.374458	1.14405e-05	135.514	361.91	134	366	+	rno:361866	HECT domain and ankyrin repeat containing, E3 ubiquitin protein ligase 1	1e-86	Huwe1	E3 ubiquitin-protein ligase HUWE1
Lmod1	-2.34923	0.196251	1.21569e-05	14.1582	72.1843	14	73	+	rno:304816	leiomodin 1 (smooth muscle)	0	Lmod1	Leiomodin-1
Dcun1d1	-1.74075	0.299213	1.22877e-05	43.4859	145.357	43	147	-	rno:310324	DCN1, defective in cullin neddylation 1, domain containing 1	2e-143	Dcun1d1	DCN1, defective in cullin neddylation 1, domain containing 1 (S. cerevisiae)
Slc4a5	-1.43013	0.371097	1.23028e-05	124.39	335.212	123	339	+	rno:297386	solute carrier family 4, sodium bicarbonate cotransporter, member 5	0	Slc4a5	Protein Slc4a5
Cldn10	-4.13079	0.0570831	1.24893e-05	2.0226	35.5978	2	36	+	rno:290485	claudin 10	3e-115	Cldn10	Cldn10 protein
Csmd3	-11.3831	0.000374415	1.29339e-05	0	26.6983	0	27	-	rno:314942	CUB and Sushi multiple domains 3	0	Csmd3	CUB and sushi domain-containing protein 3
Lhx3	-11.3831	0.000374415	1.29339e-05	0	26.6983	0	27	-	rno:170671	LIM homeobox 3	0	Lhx3	LIM homeobox protein 3
Dynlrb2	1.8164	3.52202	1.34887e-05	125.401	35.5978	124	36	+	rno:361415	dynein light chain roadblock-type 2	4e-52	Dynlrb2	Dynein light chain roadblock-type 2
F2rl1	11.3611	2630.38	1.36293e-05	26.2938	0	26	0	-	rno:116677	coagulation factor II (thrombin) receptor-like 1	0	F2rl1	Proteinase-activated receptor 2
Capsl	11.3611	2630.38	1.36293e-05	26.2938	0	26	0	+	rno:294795	calcyphosine-like	4e-54	Capsl	Calcyphosin-like protein
P2rx6	-2.25228	0.209893	1.38428e-05	16.1808	77.1285	16	78	+	rno:25041	purinergic receptor P2X, ligand-gated ion channel, 6	0	P2rx6	P2X purinoceptor 6
LOC100910839	-1.64714	0.319273	1.41038e-05	54.6102	171.067	54	173	+		leucine zipper protein 2-like	3e-140	Luzp2	Leucine zipper protein 2
Il1rl1	2.59192	6.02901	1.43484e-05	59.6667	9.88826	59	10	+	rno:25556	interleukin 1 receptor-like 1	0	Il1rl1	Interleukin-1 receptor-like 1
Ston2	-1.65927	0.3166	1.44801e-05	52.5876	166.123	52	168	-	rno:314349	stonin 2	0	Ston2	Stonin-2
Dhx58	1.60163	3.03486	1.45619e-05	186.079	61.3072	184	62	-	rno:303538	DEXH (Asp-Glu-X-His) box polypeptide 58	0	Dhx58	Putative uncharacterized protein
Pla2g4a	1.79997	3.48212	1.45665e-05	127.424	36.5866	126	37	-	rno:24653	phospholipase A2, group IVA (cytosolic, calcium-dependent)	0	Pla2g4a	Cytosolic phospholipase A2
Dhx36	-1.47528	0.359664	1.48372e-05	97.0848	269.95	96	273	-	rno:310461	DEAH (Asp-Glu-Ala-His) box polypeptide 36	0	Dhx36	Dhx36 protein
Igf1	1.26934	2.41052	1.51889e-05	1075.01	445.961	1063	451	+	rno:24482	insulin-like growth factor 1	6e-87	Igf1	Insulin-like growth factor I
Evi2b	1.65304	3.14496	1.53099e-05	164.842	52.4078	163	53	-		ecotropic viral integration site 2B	6e-162	Evi2a-evi2b	Protein Gm21975
Med13	-1.51636	0.349567	1.5496e-05	81.9153	234.352	81	237	-	rno:303403	mediator complex subunit 13	0	Med13	Mediator of RNA polymerase II transcription subunit 13
Vsnl1	2.44647	5.45079	1.65523e-05	64.7232	11.8659	64	12	-	rno:24877	visinin-like 1	1e-110	Vsnl1	Visinin-like protein 1
Parp9	1.6011	3.03375	1.81978e-05	180.011	59.3296	178	60	-	rno:303905	poly (ADP-ribose) polymerase family, member 9	0	Parp9	Poly [ADP-ribose] polymerase 9
RGD1311723	-1.75873	0.295507	1.86655e-05	39.4407	133.492	39	135	-	rno:363018	similar to KIAA1731 protein	0	Cep295	Centrosomal protein of 295 kDa
Fcgr3a	1.33616	2.52478	1.91756e-05	479.356	189.855	474	192	+	rno:304966	Fc fragment of IgG, low affinity IIIa, receptor	3e-121	Fcgr4	Fc gamma RIIIa receptor
Syne3	1.93535	3.8247	1.92651e-05	102.141	26.6983	101	27	-	rno:299356	spectrin repeat containing, nuclear envelope family member 3	0	Syne3	Nesprin-3
C2cd4d	4.92527	30.3847	1.9321e-05	30.339	0.988826	30	1	+	rno:100363111	C2 calcium-dependent domain containing 4D	0	C2cd4d	C2 calcium-dependent domain-containing protein 4D
Tiparp	-1.51495	0.349909	1.96315e-05	78.8814	225.452	78	228	+		TCDD-inducible poly(ADP-ribose) polymerase	0	Tiparp	TCDD-inducible poly [ADP-ribose] polymerase
LOC102547753	-4.90805	0.0333066	2.00041e-05	1.0113	30.6536	1	31	+		uncharacterized LOC102547753
Lppr4	-1.74343	0.298658	2.0313e-05	40.452	135.469	40	137	+	rno:295401	lipid phosphate phosphatase-related protein type 4	0	Lppr4	Lipid phosphate phosphatase-related protein type 4
Tmem192	1.39867	2.63659	2.06227e-05	333.729	126.57	330	128	-	rno:361137	transmembrane protein 192	9e-111	Tmem192	Putative uncharacterized protein
Myrip	-1.5388	0.344172	2.0809e-05	71.8023	208.642	71	211	+	rno:360034	myosin VIIA and Rab interacting protein	0	Myrip	Rab effector MyRIP
Spata24	1.85924	3.62817	2.18157e-05	111.243	30.6536	110	31	-	rno:291676	spermatogenesis associated 24	5e-110	Spata24	Spermatogenesis-associated protein 24
Tspo	1.38368	2.60934	2.22871e-05	350.921	134.48	347	136	+	rno:24230	translocator protein	1e-90	Tspo	Translocator protein
Krit1	-1.98208	0.253124	2.24703e-05	24.2712	95.9162	24	97	-	rno:362317	KRIT1, ankyrin repeat containing	0	Krit1	KRIT1, ankyrin repeat containing, isoform CRA_a
RGD1563941	1.54581	2.91968	2.25251e-05	199.226	68.229	197	69	+	rno:500993	similar to hypothetical protein FLJ20010	5e-60	Gm5617	Uncharacterized protein C11orf71 homolog
Arhgap20	-1.41878	0.374028	2.25281e-05	114.277	305.547	113	309	+	rno:367085	Rho GTPase activating protein 20	0	Arhgap20	Rho GTPase-activating protein 20
Blk	-11.3286	0.00038881	2.26603e-05	0	25.7095	0	26	-	rno:364403	BLK proto-oncogene, Src family tyrosine kinase	0	Blk	Tyrosine-protein kinase Blk
Npff	-11.3286	0.00038881	2.26603e-05	0	25.7095	0	26	-	rno:60337	neuropeptide FF-amide peptide precursor
RGD1563323	-11.3286	0.00038881	2.26603e-05	0	25.7095	0	26	-	rno:361702	similar to hypothetical protein FLJ22531
Zc3hav1	1.53963	2.90719	2.33618e-05	201.249	69.2179	199	70	-	rno:252832	zinc finger CCCH type, antiviral 1	0	Zc3hav1	Zinc finger CCCH-type antiviral protein 1
Arl5b	-1.31695	0.401384	2.37647e-05	210.35	524.078	208	530	+	rno:364788	ADP-ribosylation factor-like 5B	3e-104	Arl5b	ADP-ribosylation factor-like protein 5B
Plcb2	1.35073	2.55041	2.39534e-05	408.565	160.19	404	162	-	rno:85240	phospholipase C, beta 2	0	Plcb2	1-phosphatidylinositol 4,5-bisphosphate phosphodiesterase beta-2
Ntn3	1.57069	2.97046	2.41116e-05	185.068	62.2961	183	63	-	rno:114524	netrin 3	0	Ntn3	Netrin 2-like (Chicken), isoform CRA_a
Crhbp	11.3045	2529.25	2.43854e-05	25.2825	0	25	0	-	rno:29625	corticotropin releasing hormone binding protein	0	Crhbp	Putative uncharacterized protein
LOC103691626	11.3045	2529.25	2.43854e-05	25.2825	0	25	0	-		uncharacterized LOC103691626
Zfp382	-1.43856	0.368935	2.48102e-05	102.141	276.871	101	280	+	rno:246264	zinc finger protein 382	0	Zfp382	Zinc finger protein 382
Fut7	-2.8309	0.140545	2.50949e-05	7.0791	50.4301	7	51	+	rno:296564	fucosyltransferase 7 (alpha (1,3) fucosyltransferase)	7e-179	Fut7	Alpha-(1,3)-fucosyltransferase 7
Fcgr2b	2.83798	7.15021	2.64434e-05	49.5537	6.92179	49	7	-	rno:289211	Fc fragment of IgG, low affinity IIb, receptor (CD32)	1e-106	Fcgr2b	Low affinity immunoglobulin gamma Fc region receptor II
Cyba	1.22137	2.33168	2.72697e-05	2199.58	943.34	2175	954	-	rno:79129	cytochrome b-245, alpha polypeptide	7e-76	Cyba	Cytochrome b-245, alpha polypeptide, isoform CRA_a
Acsl6	-1.41496	0.375021	2.74268e-05	111.243	296.648	110	300	+	rno:117243	acyl-CoA synthetase long-chain family member 6	0	Acsl6	Long-chain acyl-CoA synthetase
LOC691135	-3.62618	0.0809862	2.74698e-05	3.0339	37.5754	3	38	+	rno:691135	similar to zinc finger protein 418	0	Zfp418	Zinc finger protein 418
Csrnp3	-1.88777	0.270224	2.85402e-05	28.3164	104.816	28	106	+	rno:311093	cysteine-serine-rich nuclear protein 3	0	Csrnp3	Cysteine/serine-rich nuclear protein 3
Mvp	1.22799	2.34241	2.95427e-05	1419.86	606.151	1404	613	-	rno:64681	major vault protein
Hdhd3	1.80789	3.5013	3.19425e-05	114.277	32.6313	113	33	-	rno:688746	haloacid dehalogenase-like hydrolase domain containing 3	4e-134	Hdhd3	Haloacid dehalogenase-like hydrolase domain-containing protein 3
Phospho1	4.87638	29.3722	3.31182e-05	29.3277	0.988826	29	1	+	rno:287644	phosphatase, orphan 1	1e-157	Phospho1	Phosphatase, orphan 1
Piezo1	1.26381	2.40129	3.35905e-05	702.853	292.693	695	296	-	rno:361430	piezo-type mechanosensitive ion channel component 1	0	Piezo1	Piezo-type mechanosensitive ion channel component 1
Orc2	-1.36756	0.387547	3.38764e-05	134.503	347.078	133	351	-	rno:301430	origin recognition complex, subunit 2	0	Orc2	Origin recognition complex subunit 2
Lin9	-2.60368	0.164518	3.41181e-05	9.1017	55.3743	9	56	+	rno:689523	lin-9 DREAM MuvB core complex component	0	Lin9	Protein lin-9 homolog
Ica1l	-1.74654	0.298016	3.48239e-05	37.4181	125.581	37	127	-	rno:316432	islet cell autoantigen 1-like	0	Ica1l	Islet cell autoantigen 1-like protein
Pcdhb6	-1.74654	0.298016	3.48239e-05	37.4181	125.581	37	127	+	rno:291653	protocadherin beta 6	0	Pcdhb6	Protocadherin beta 6
Cln5	1.58307	2.99606	3.57808e-05	168.887	56.3631	167	57	+	rno:306128	ceroid-lipofuscinosis, neuronal 5	0	Cln5	MCG114116
Egr1	1.34647	2.54289	3.58884e-05	372.158	146.346	368	148	+	rno:24330	early growth response 1	0	Egr1	Early growth response protein 1
Ngly1	-1.29635	0.407154	3.68168e-05	211.362	519.134	209	525	-	rno:361014	N-glycanase 1	0	Ngly1	Peptide-N(4)-(N-acetyl-beta-glucosaminyl)asparagine amidase
Fam111a	-2.93514	0.130748	3.7055e-05	6.0678	46.4748	6	47	+	rno:499322	family with sequence similarity 111, member A	0	Fam111a	Protein FAM111A
Lca5	-1.59622	0.330743	3.70999e-05	54.6102	165.134	54	167	-	rno:300866	Leber congenital amaurosis 5	0	Lca5	Lebercilin
Tuba4a	1.26861	2.40929	3.71539e-05	636.108	264.017	629	267	-	rno:316531	tubulin, alpha 4A	0	Tuba4a	Tubulin alpha-4A chain
Srgn	2.80824	7.00431	3.95463e-05	48.5424	6.92179	48	7	-	rno:56782	serglycin	1e-52	Srgn	Serglycin
Cd40	2.80824	7.00431	3.95463e-05	48.5424	6.92179	48	7	+	rno:171369	CD40 molecule, TNF receptor superfamily member 5	6e-74	Cd40	Tumor necrosis factor receptor superfamily member 5
LOC102548155	-11.2721	0.000404356	3.98446e-05	0	24.7207	0	25	+		uncharacterized LOC102548155
LOC102552843	-11.2721	0.000404356	3.98446e-05	0	24.7207	0	25	+		phosphoglycerate mutase 1-like
Pxdn	-1.27421	0.413453	3.99509e-05	249.791	604.173	247	611	+	rno:554172	peroxidasin homolog (Drosophila)	0	Pxdn	Peroxidasin homolog (Drosophila)
Dok3	1.41978	2.67545	4.09633e-05	261.927	97.8938	259	99	+	rno:306760	docking protein 3	0	Dok3	Docking protein 3, isoform CRA_b
Crip1	1.37812	2.5993	4.12727e-05	308.446	118.659	305	120	+	rno:691657	cysteine-rich protein 1 (intestinal)	4e-21	Crip3	Cysteine-rich protein 3, isoform CRA_b
Anxa3	1.26156	2.39755	4.14728e-05	647.232	269.95	640	273	-	rno:25291	annexin A3	2e-173	Anxa3	Annexin A3
Kcnk3	1.74155	3.34395	4.15326e-05	122.367	36.5866	121	37	-	rno:29553	potassium channel, subfamily K, member 3	0	Kcnk3	Potassium channel subfamily K member 3
Fmod	-1.96712	0.255764	4.20901e-05	23.2599	90.972	23	92	+	rno:64507	fibromodulin	0	Fmod	Fibromodulin
Ptprt	-1.27709	0.412628	4.2403e-05	236.644	573.519	234	580	-	rno:362263	protein tyrosine phosphatase, receptor type, T	0	Ptprt	Protein-tyrosine-phosphatase
Slfn5	2.51664	5.7225	4.26981e-05	56.6328	9.88826	56	10	+	rno:303377	schlafen family member 5	0	Slfn9	Protein Slfn9
Slc34a1	11.2456	2428.12	4.37961e-05	24.2712	0	24	0	-	rno:25548	solute carrier family 34 (type II sodium/phosphate contransporter), member 1	0	Slc34a1	Sodium-dependent phosphate transport protein 2A
LOC102548163	11.2456	2428.12	4.37961e-05	24.2712	0	24	0	-		uncharacterized LOC102548163
Il12a	11.2456	2428.12	4.37961e-05	24.2712	0	24	0	+	rno:84405	interleukin 12A	2e-104	Il12a	Interleukin-12 subunit alpha
Irs3	11.2456	2428.12	4.37961e-05	24.2712	0	24	0	+	rno:84021	insulin receptor substrate 3	0	Irs3	Protein Irs3
Ncr3	11.2456	2428.12	4.37961e-05	24.2712	0	24	0	+	rno:294251	natural cytotoxicity triggering receptor 3
Gpt	-1.33331	0.396855	4.61109e-05	150.684	379.709	149	384	+	rno:81670	glutamic-pyruvate transaminase (alanine aminotransferase)	2e-158	Gpt2	Alanine aminotransferase 2
Fam63b	-1.30058	0.405964	4.9886e-05	183.045	450.905	181	456	-	rno:363089	family with sequence similarity 63, member B	0	Fam63b	Putative uncharacterized protein
RGD1563400	4.02559	16.2863	4.99234e-05	32.3616	1.97765	32	2	-	rno:360777	similar to paired immunoglobin-like type 2 receptor beta	5e-83	Pilrb2	Paired immunoglobulin-like type 2 receptor beta-2
LOC303590	-1.52202	0.348198	5.25763e-05	64.7232	185.899	64	188	-		similar to cactin CG1676-PA
Tcirg1	1.19931	2.29629	5.32172e-05	1564.48	681.301	1547	689	-	rno:293650	T-cell, immune regulator 1, ATPase, H+ transporting, lysosomal V0 subunit A3	0	Tcirg1	Protein Tcirg1
Rps6ka5	-1.23545	0.424711	5.6607e-05	324.627	764.363	321	773	-	rno:314384	ribosomal protein S6 kinase, polypeptide 5	0	Rps6ka5	Putative uncharacterized protein
Angptl6	-4.81187	0.0356028	5.66942e-05	1.0113	28.676	1	29	-	rno:298698	angiopoietin-like 6	0	Angptl6	Angiopoietin-related protein 6
Tas2r137	-4.81187	0.0356028	5.66942e-05	1.0113	28.676	1	29	+	rno:500089	taste receptor, type 2, member 137	8e-146	Tas2r137	Taste receptor type 2 member 3
H19	1.20571	2.3065	5.67108e-05	14010.5	6074.36	13854	6143	-		H19, imprinted maternally expressed transcript (non-protein coding)
LOC103690122	-1.84636	0.278094	5.71734e-05	28.3164	101.849	28	103	-		arginyl-tRNA--protein transferase 1-like	0	Ate1	Arginyl-tRNA--protein transferase 1
Ap4e1	-1.72811	0.301846	5.90052e-05	36.4068	120.637	36	122	+	rno:311404	adaptor-related protein complex 4, epsilon 1 subunit	0	Ap4e1	AP-4 complex subunit epsilon-1
Sgcb	-1.25871	0.417918	6.13255e-05	239.678	573.519	237	580	+	rno:680229	sarcoglycan, beta (dystrophin-associated glycoprotein)	0	Sgcb	Beta-sarcoglycan
Plcg2	1.49362	2.81594	6.17292e-05	192.147	68.229	190	69	+	rno:29337	phospholipase C, gamma 2	0	Plcg2	1-phosphatidylinositol 4,5-bisphosphate phosphodiesterase gamma-2
Trpc7	-1.54406	0.342918	6.24381e-05	58.6554	171.067	58	173	+	rno:282822	transient receptor potential cation channel, subfamily C, member 7	0	Trpc7	Short transient receptor potential channel 7
Dpp10	-1.71205	0.305225	6.35187e-05	37.4181	122.614	37	124	-	rno:363972	dipeptidylpeptidase 10	0	Dpp10	Inactive dipeptidyl peptidase 10
Bspry	2.90479	7.48906	6.36258e-05	44.4972	5.93296	44	6	+	rno:64027	B-box and SPRY domain containing	5e-109	Bspry	B-box and SPRY domain containing, isoform CRA_a
Adamts18	-1.6006	0.32974	6.43142e-05	49.5537	150.302	49	152	-	rno:361412	ADAM metallopeptidase with thrombospondin type 1 motif, 18	0	Adamts18	Adamts18 protein
Atr	-2.47737	0.179571	6.43688e-05	10.113	56.3631	10	57	+		ATR serine/threonine kinase	0	Atr	Serine/threonine-protein kinase ATR
Ispd	-2.47737	0.179571	6.43688e-05	10.113	56.3631	10	57	+	rno:493574	isoprenoid synthase domain containing	8e-178	Ispd	Isoprenoid synthase domain-containing protein
Lpcat2	1.3567	2.56098	6.60708e-05	301.367	117.67	298	119	-	rno:100359680	lysophosphatidylcholine acyltransferase 2	0	Lpcat2	Lpcat2 protein
Trim16	-2.18923	0.219269	6.93604e-05	15.1695	69.2179	15	70	+	rno:303214	tripartite motif-containing 16	0	Trim16	Tripartite motif-containing protein 16
Agrp	-11.2132	0.000421197	7.03162e-05	0	23.7318	0	24	-	rno:25582	agouti related neuropeptide	1e-55	Agrp	Agouti-related protein
LOC685651	-11.2132	0.000421197	7.03162e-05	0	23.7318	0	24	+		similar to ribosomal protein L18a
Bst2	1.486	2.80112	7.12653e-05	191.136	68.229	189	69	-	rno:378947	bone marrow stromal cell antigen 2	8e-65	Bst2	Bone marrow stromal antigen 2
Rapgef6	-1.33974	0.395091	7.80003e-05	125.401	317.413	124	321	+	rno:303141	Rap guanine nucleotide exchange factor (GEF) 6	0	Rapgef6	Rapgef6 protein
Klhl6	1.46452	2.75972	7.86167e-05	199.226	72.1843	197	73	+	rno:287974	kelch-like family member 6	0	Klhl6	Kelch-like protein 6
Usp45	-1.80969	0.285253	7.88842e-05	29.3277	102.838	29	104	+	rno:313098	ubiquitin specific peptidase 45	0	Usp45	Ubiquitinyl hydrolase 1
LOC102555502	11.1842	2326.99	7.8961e-05	23.2599	0	23	0	-		uncharacterized LOC102555502
Oas2	11.1842	2326.99	7.8961e-05	23.2599	0	23	0	+	rno:363938	2'-5' oligoadenylate synthetase 2	0	Oas2	2'-5'-oligoadenylate synthase 2
Il1b	11.1842	2326.99	7.8961e-05	23.2599	0	23	0	-	rno:24494	interleukin 1 beta	2e-130	Il1b	Interleukin-1 beta
Spag1	-2.38974	0.190817	8.20236e-05	11.1243	58.3408	11	59	+	rno:315033	sperm associated antigen 1	0	Spag1	Sperm-associated antigen 1
Rfx3	-1.28602	0.410081	8.41285e-05	169.898	414.318	168	419	-	rno:361746	regulatory factor X, 3 (influences HLA class II expression)	0	Rfx3	Transcription factor RFX3
Camta1	-1.18105	0.441031	8.54979e-05	703.865	1595.97	696	1614	-	rno:362665	calmodulin binding transcription activator 1
Plekhd1	-1.8779	0.27208	8.66933e-05	25.2825	92.9497	25	94	+	rno:500685	pleckstrin homology domain containing, family D (with coiled-coil domains) member 1	0	Plekhd1	Pleckstrin homology domain-containing family D member 1
Arhgap5	-1.8779	0.27208	8.66933e-05	25.2825	92.9497	25	94	+	rno:299012	Rho GTPase activating protein 5	0	Arhgap5	Rho GTPase activating protein 5
Tbx19	-3.96092	0.0642162	8.79047e-05	2.0226	31.6424	2	32	-	rno:304935	T-box 19	0	Tbx19	T-box transcription factor TBX19
LOC102547443	-3.96092	0.0642162	8.79047e-05	2.0226	31.6424	2	32	-		uncharacterized LOC102547443
Poli	-1.81807	0.2836	9.07919e-05	28.3164	99.8715	28	101	-	rno:291526	polymerase (DNA directed), iota	0	Poli	DNA polymerase iota truncated form
Foxp2	-1.47878	0.358792	9.10399e-05	67.7571	188.866	67	191	+	rno:500037	forkhead box P2	0	Foxp2	Forkhead box protein P2
Hist1h2bk	-2.45184	0.182777	9.13366e-05	10.113	55.3743	10	56	-	rno:680312	histone cluster 1, H2bk	3e-68	Hist1h2bc	Histone H2B type 1-C/E/G
Edem3	-1.26613	0.415774	9.38572e-05	189.113	454.86	187	460	+	rno:289085	ER degradation enhancer, mannosidase alpha-like 3	0	Edem3	alpha-1,2-Mannosidase
Idnk	-1.65663	0.317178	9.43083e-05	40.452	127.559	40	129	-	rno:498695	idnK, gluconokinase homolog (E. coli)	3e-91	Idnk	Probable gluconokinase
Nckap1l	1.19475	2.28905	9.61361e-05	912.192	398.497	902	403	+	rno:315348	NCK associated protein 1 like	0	Nckap1l	Putative uncharacterized protein
Tal2	4.77332	27.3472	9.80381e-05	27.3051	0.988826	27	1	+	rno:685229	T-cell acute lymphocytic leukemia 2	3e-51	Tal2	T-cell acute lymphocytic leukemia 2
LOC100362023	3.53049	11.5553	9.83861e-05	34.3842	2.96648	34	3	+	rno:100362023	CDC42 small effector 2-like	5e-46	Cdc42se2	CDC42 small effector protein 2
Myo1e	1.24344	2.36762	0.000100008	512.729	216.553	507	219	+	rno:25484	myosin IE	0	Myo1e	Unconventional myosin-Ie
Trip11	-1.29936	0.406305	0.000101446	146.638	360.922	145	365	-	rno:314393	thyroid hormone receptor interactor 11	0	Trip11	Thyroid hormone receptor interactor 11
Grid2	-2.3124	0.201325	0.000101814	12.1356	60.3184	12	61	+	rno:79220	glutamate receptor, ionotropic, delta 2	0	Grid2	Glutamate receptor ionotropic, delta-2
LOC100363332	3.23862	9.43889	0.000104025	37.4181	3.95531	37	4	+	rno:100363332	caspase recruitment domain family, member 11	0	Card11	Putative uncharacterized protein
Tmem170b	-1.93393	0.261715	0.000104396	22.2486	85.0391	22	86	-	rno:361230	transmembrane protein 170B	7e-70	Tmem170b	Transmembrane protein 170B
Acvr2a	-1.43908	0.368803	0.000105102	75.8475	205.676	75	208	+	rno:29263	activin A receptor, type IIA	0	Acvr2a	Serine/threonine-protein kinase receptor
Syngr2	1.19823	2.29458	0.000106532	800.949	349.056	792	353	+	rno:89815	synaptogyrin 2	2e-117	Syngr2	Synaptogyrin-2
Tstd1	-1.98497	0.252619	0.000107793	20.226	80.0949	20	81	+	rno:100359478	thiosulfate sulfurtransferase (rhodanese)-like domain containing 1	7e-69	Tstd1	Protein Tstd1
Ptprr	-1.98497	0.252619	0.000107793	20.226	80.0949	20	81	+	rno:94202	protein tyrosine phosphatase, receptor type, R	0	Ptprr	Protein-tyrosine-phosphatase
Gabpb1l	2.37927	5.20275	0.000108217	56.6328	10.8771	56	11	+	rno:364738	GA binding protein transcription factor, beta subunit 1-like	0	Gabpb1	GA-binding protein subunit beta-1
Sass6	-2.60994	0.163805	0.000110145	8.0904	49.4413	8	50	+	rno:310807	spindle assembly 6 homolog (C. elegans)	0	Sass6	Putative uncharacterized protein
Ada	1.33901	2.52977	0.000111494	285.187	112.726	282	114	-	rno:24165	adenosine deaminase	0	Ada	Adenosine deaminase
Rhbdf2	1.31181	2.48254	0.000113075	321.593	129.536	318	131	-	rno:303690	rhomboid 5 homolog 2 (Drosophila)	0	Rhbdf2	Inactive rhomboid protein 2
Srm	1.40428	2.64686	0.000113865	222.486	84.0502	220	85	+	rno:84596	spermidine synthase
Dlx6	-1.90299	0.267388	0.000116222	23.2599	87.0167	23	88	+	rno:500023	distal-less homeobox 6	5e-133	Dlx6	Truncated transcription factor Dlx6
Athl1	1.30245	2.46647	0.000119449	331.706	134.48	328	136	+	rno:309103	ATH1, acid trehalase-like 1 (yeast)	0	Athl1	Acid trehalase-like protein 1
Itga5	1.22656	2.34008	0.00012031	546.102	233.363	540	236	-	rno:315346	integrin, alpha 5 (fibronectin receptor, alpha polypeptide)	0	Itga5	Integrin alpha-5
RGD1307443	-1.63216	0.322605	0.000120926	41.4633	128.547	41	130	-	rno:361244	similar to mKIAA0319 protein	0	AU040320	Protein AU040320
Tmem229a	-1.31709	0.401343	0.000122425	125.401	312.469	124	316	-	rno:685756	transmembrane protein 229A	0	Tmem229a	Transmembrane protein 229A
Gngt2	1.29712	2.45738	0.000123253	337.774	137.447	334	139	+	rno:690825	guanine nucleotide binding protein (G protein), gamma transducing activity polypeptide 2	2e-32	Gngt2	Guanine nucleotide-binding protein subunit gamma
Orc1	2.01274	4.03547	0.000124189	75.8475	18.7877	75	19	+	rno:313479	origin recognition complex, subunit 1	0	Orc1	Putative uncharacterized protein
Plg	-11.1518	0.000439502	0.00012455	0	22.743	0	23	-	rno:85253	plasminogen	0	Plg	Plasminogen
Samd5	-11.1518	0.000439502	0.00012455	0	22.743	0	23	-	rno:365038	sterile alpha motif domain containing 5	7e-94	Samd5	Sterile alpha motif domain-containing protein 5
Stxbp5l	-11.1518	0.000439502	0.00012455	0	22.743	0	23	+	rno:288080	syntaxin binding protein 5-like	0	Stxbp5l	Syntaxin binding protein 5-like
LOC102556590	-11.1518	0.000439502	0.00012455	0	22.743	0	23	+		uncharacterized LOC102556590
Col6a6	-11.1518	0.000439502	0.00012455	0	22.743	0	23	-	rno:315979	collagen, type VI, alpha 6	0	Col6a6	Uncharacterized protein
Rb1cc1	-1.42178	0.373253	0.000127162	77.8701	208.642	77	211	-	rno:312927	RB1-inducible coiled-coil 1	0	Rb1cc1	RB1-inducible coiled-coil 1
Ndufaf4	-2.0693	0.238275	0.000127495	17.1921	72.1843	17	73	+	rno:362495	NADH dehydrogenase (ubiquinone) complex I, assembly factor 4	1e-86	Ndufaf4	NADH dehydrogenase [ubiquinone] 1 alpha subcomplex assembly factor 4
Nov	-2.42585	0.1861	0.000129605	10.113	54.3855	10	55	+	rno:81526	nephroblastoma overexpressed	0	Nov	Putative uncharacterized protein
LOC103691171	2.71515	6.56663	0.000132536	45.5085	6.92179	45	7	+		uncharacterized LOC103691171
Hbb-b1	1.90071	3.73398	0.000134075	84.9492	22.743	84	23	+	rno:361619	hemoglobin, beta adult major chain	8e-65	Hbb-bs	Protein Hbb-bs
Junb	1.18793	2.27826	0.000136507	781.735	343.123	773	347	-	rno:24517	jun B proto-oncogene	0	Junb	Transcription factor jun-B
Ppap2b	-1.1531	0.449657	0.000139904	1105.35	2458.22	1093	2486	+	rno:192270	phosphatidic acid phosphatase type 2B	0	Ppap2b	Lipid phosphate phosphohydrolase 3
Mtap	1.4917	2.81219	0.000140777	166.864	59.3296	165	60	+	rno:298227	methylthioadenosine phosphorylase	8e-166	Mtap	S-methyl-5'-thioadenosine phosphorylase
Prp2l1	-1.66475	0.315399	0.000141262	37.4181	118.659	37	120	-	rno:287750	proline rich protein 2-like 1	0	Gm884	Protein Gm884
Mfap3l	-1.40241	0.378298	0.000142626	81.9153	216.553	81	219	-	rno:306424	microfibrillar-associated protein 3-like	5e-177	Mfap3l	Microfibrillar-associated protein 3-like
Fscn2	11.1201	2225.86	0.000142915	22.2486	0	22	0	+	rno:303741	fascin actin-bundling protein 2, retinal	0	Fscn2	Fascin-2
LOC681383	11.1201	2225.86	0.000142915	22.2486	0	22	0	-	rno:681383	similar to Protein C10orf11 homolog	1e-44	1700112E06Rik	Protein 1700112E06Rik
Plk4	-2.49679	0.177171	0.00014482	9.1017	51.419	9	52	+	rno:310344	polo-like kinase 4	2e-60	Plk3	Serine/threonine-protein kinase PLK3
Fhod1	1.27522	2.42036	0.000148673	359.011	148.324	355	150	-	rno:291964	formin homology 2 domain containing 1	0	Fhod1	FH1/FH2 domain-containing protein 1
Slc31a2	1.33527	2.52322	0.000154523	266.983	105.804	264	107	+	rno:298091	solute carrier family 31 (copper transporter), member 2	2e-68	Slc31a2	Putative uncharacterized protein
Cd68	1.14663	2.21397	0.000154819	2125.75	960.15	2102	971	-	rno:287435	Cd68 molecule	4e-127	Cd68	Macrosialin
Rsad2	2.99335	7.96319	0.000158929	39.4407	4.94413	39	5	-	rno:65190	radical S-adenosyl methionine domain containing 2	0	Rsad2	Radical S-adenosyl methionine domain-containing protein 2
Ssmem1	2.99335	7.96319	0.000158929	39.4407	4.94413	39	5	+	rno:500068	serine-rich single-pass membrane protein 1	1e-93	Ssmem1	Protein Ssmem1
LOC100362965	3.48743	11.2156	0.000159334	33.3729	2.96648	33	3	-	rno:100362965	SNRPN upstream reading frame protein-like	1e-34	Snurf	SNRPN upstream reading frame protein
Sp110	1.47657	2.78286	0.000168052	167.876	60.3184	166	61	-	rno:301570	SP110 nuclear body protein	5e-132	Sp110	MGC118608 protein
Pnpt1	-2.0494	0.241584	0.000170176	17.1921	71.1955	17	72	+	rno:360992	polyribonucleotide nucleotidyltransferase 1	0	Pnpt1	Putative uncharacterized protein
Gja1	-1.14576	0.451952	0.000170798	919.272	2034.02	909	2057	+	rno:24392	gap junction protein, alpha 1	0	Gja1	Gap junction alpha-1 protein
Ankrd45	-1.45287	0.365295	0.000171809	65.7345	179.966	65	182	+	rno:289152	ankyrin repeat domain 45	2e-65	Ankrd45	Ankyrin repeat domain-containing protein 45
Tnfaip3	1.37037	2.58537	0.0001743	227.542	88.0056	225	89	-	rno:683206	tumor necrosis factor, alpha-induced protein 3	0	Tnfaip3	Tumor necrosis factor alpha-induced protein 3
Plcl1	-1.28513	0.410334	0.000174976	135.514	330.268	134	334	+	rno:84587	phospholipase C-like 1	0	Plcl1	Inactive phospholipase C-like protein 1
Tcp11	-3.46576	0.0905112	0.000175159	3.0339	33.6201	3	34	-	rno:309641	t-complex protein 11	2e-145	1700008I05Rik	Protein 1700008I05Rik
LOC102556302	-1.57355	0.335981	0.000178029	45.5085	135.469	45	137	+		uncharacterized LOC102556302
Tyw3	-1.46445	0.362375	0.000180052	62.7006	173.045	62	175	-	rno:499731	tRNA-yW synthesizing protein 3 homolog (S. cerevisiae)
Inpp5d	1.15509	2.22698	0.000180084	1116.47	501.335	1104	507	+	rno:54259	inositol polyphosphate-5-phosphatase D	0	Inpp5d	Phosphatidylinositol 3,4,5-trisphosphate 5-phosphatase 1
Tmem68	-1.28093	0.411529	0.00018083	137.537	334.223	136	338	-	rno:312946	transmembrane protein 68	0	Tmem68	Transmembrane protein 68
Slc17a5	-1.38917	0.381784	0.000182235	81.9153	214.575	81	217	-	rno:363103	solute carrier family 17 (acidic sugar transporter), member 5	0	Slc17a5	Sialin
Trank1	-1.20157	0.434801	0.000187694	249.791	574.508	247	581	+	rno:316022	tetratricopeptide repeat and ankyrin repeat containing 1	0	Trank1	TPR and ankyrin repeat-containing protein 1
LOC102548499	-1.67091	0.314056	0.000187881	35.3955	112.726	35	114	+		SWI/SNF-related matrix-associated actin-dependent regulator of chromatin subfamily A member 5-like
Frrs1	1.70197	3.25344	0.000188382	106.186	32.6313	105	33	+	rno:310810	ferric-chelate reductase 1	0	Frrs1	Ferric-chelate reductase 1
Ceacam18	-2.96509	0.128061	0.000192503	5.0565	39.5531	5	40	+		carcinoembryonic antigen-related cell adhesion molecule 18	2e-173	Ceacam18	Carcinoembryonic antigen-related cell adhesion molecule 18
Siglec5	-1.52379	0.347771	0.000193445	51.5763	148.324	51	150	-	rno:292843	sialic acid binding Ig-like lectin 5	0	Siglecf	Siglec5 protein
Pwwp2b	1.36394	2.57388	0.00019652	226.531	88.0056	224	89	+	rno:361671	PWWP domain containing 2B	0	Pwwp2b	Protein Pwwp2b
Mcoln2	2.68274	6.42074	0.000198417	44.4972	6.92179	44	7	+	rno:292168	mucolipin 2	0	Mcoln2	Mucolipin-2
Mmp19	1.41696	2.67022	0.000203344	190.124	71.1955	188	72	+	rno:304608	matrix metallopeptidase 19	0	Mmp19	Matrix metallopeptidase 19, isoform CRA_a
Slc25a26	-1.34253	0.394329	0.000204359	97.0848	246.218	96	249	+	rno:362403	solute carrier family 25 (S-adenosylmethionine carrier), member 26	9e-52	Slc25a26	S-adenosylmethionine mitochondrial carrier protein
Gpr21	-2.46878	0.180644	0.000207895	9.1017	50.4301	9	51	+	rno:689917	G protein-coupled receptor 21	0	Gpr21	Probable G-protein coupled receptor 21
LOC102551812	-2.46878	0.180644	0.000207895	9.1017	50.4301	9	51	-		60S ribosomal protein L7a-like
Tmem25	1.40781	2.65334	0.000209293	194.17	73.1732	192	74	-	rno:689172	transmembrane protein 25	0	Tmem25	Putative uncharacterized protein
Tnrc6a	-1.1548	0.449129	0.000210847	456.096	1015.52	451	1027	+	rno:308971	trinucleotide repeat containing 6a	0	Tnrc6a	Trinucleotide repeat-containing gene 6A protein
Igtp	1.65664	3.1528	0.00021247	112.254	35.5978	111	36	+	rno:303163	interferon gamma induced GTPase	5e-43	Irgc1	MCG22844
Fmo1	-1.49792	0.354063	0.000216461	54.6102	154.257	54	156	-	rno:25256	flavin containing monooxygenase 1	0	Fmo1	Dimethylaniline monooxygenase [N-oxide-forming] 1
Ldlrad1	-11.0877	0.000459471	0.000221434	0	21.7542	0	22	+	rno:689088	low density lipoprotein receptor class A domain containing 1	2e-46	Ldlrad1	Protein Ldlrad1
Trappc8	-11.0877	0.000459471	0.000221434	0	21.7542	0	22	-	rno:291750	trafficking protein particle complex 8	0	Trappc8	Protein Trappc8
Noxo1	-11.0877	0.000459471	0.000221434	0	21.7542	0	22	+	rno:302976	NADPH oxidase organizer 1	0	Noxo1	Noxo1 protein
Rims2	-1.32926	0.397972	0.000221572	101.13	254.128	100	257	+	rno:116839	regulating synaptic membrane exocytosis 2	0	Rims2	Regulating synaptic membrane exocytosis protein 2
Casc4	-1.21701	0.430172	0.000227229	198.215	460.793	196	466	+	rno:362204	cancer susceptibility candidate 4	0	Casc4	Protein CASC4
S100a10	1.18126	2.26774	0.000227512	618.915	272.916	612	276	+	rno:81778	S100 calcium binding protein A10	6e-49	S100a10	Protein S100-A10
RGD1307325	-1.75978	0.295294	0.000228395	28.3164	95.9162	28	97	-	rno:306469	cilia and flagella associated protein 97	0	Cfap97	Cilia- and flagella-associated protein 97
LOC498675	-1.81517	0.284171	0.000229777	25.2825	88.9944	25	90	+	rno:498675	hypothetical LOC498675	1e-133	1700102P08Rik	Uncharacterized protein C3orf62 homolog
Iqub	-2.55106	0.170629	0.00023286	8.0904	47.4637	8	48	-	rno:296936	IQ motif and ubiquitin domain containing	0	Iqub	IQ and ubiquitin-like domain-containing protein
Sipa1	1.1641	2.24094	0.000233475	753.418	336.201	745	340	-	rno:361710	signal-induced proliferation-associated 1	0	Sipa1	Signal-induced proliferation-associated protein 1
Suv420h1	-1.15527	0.448981	0.000234755	407.554	907.743	403	918	+	rno:361688	suppressor of variegation 4-20 homolog 1 (Drosophila)	0	Suv420h1	Histone-lysine N-methyltransferase SUV420H1
Zfp566	-3.86784	0.0684958	0.000235482	2.0226	29.6648	2	30	-	rno:502316	zinc finger protein 566	0	Zfp566	Mszf4
Akap9	-1.13135	0.45649	0.000240638	845.447	1852.07	836	1873	-	rno:246150	A kinase (PRKA) anchor protein 9	0	Akap9	A-kinase anchor protein 9
Qprt	1.67258	3.18785	0.000244232	107.198	33.6201	106	34	-	rno:293504	quinolinate phosphoribosyltransferase	4e-156	Qprt	Nicotinate-nucleotide pyrophosphorylase [carboxylating]
Alpk3	1.24796	2.37506	0.000244923	356.989	150.302	353	152	+	rno:365298	alpha-kinase 3	0	Alpk3	Alpha-protein kinase 3
Trem1	2.95588	7.75906	0.000246282	38.4294	4.94413	38	5	-	rno:301229	triggering receptor expressed on myeloid cells 1	3e-91	Trem1	Trem1 protein
Pecam1	2.95588	7.75906	0.000246282	38.4294	4.94413	38	5	-	rno:29583	platelet/endothelial cell adhesion molecule 1	0	Pecam1	Platelet endothelial cell adhesion molecule
Pfkfb2	-1.15546	0.448922	0.000249484	385.305	858.301	381	868	-	rno:24640	6-phosphofructo-2-kinase/fructose-2,6-biphosphatase 2	0	Pfkfb2	6-phosphofructo-2-kinase/fructose-2,6-bisphosphatase 2
Depdc1	11.0531	2124.73	0.000259682	21.2373	0	21	0	+	rno:295538	DEP domain containing 1	0	Depdc1a	DEP domain containing 1a, isoform CRA_c
LOC100912045	11.0531	2124.73	0.000259682	21.2373	0	21	0	-		ADP-ribosylation factor 3-like
Vax2	11.0531	2124.73	0.000259682	21.2373	0	21	0	+	rno:64572	ventral anterior homeobox 2	1e-141	Vax2	Ventral anterior homeobox containing gene 2
LOC102546354	11.0531	2124.73	0.000259682	21.2373	0	21	0	+		zinc finger protein 14-like	0	Zfp14	Zinc finger protein 14
Ccl12	11.0531	2124.73	0.000259682	21.2373	0	21	0	+	rno:287562	chemokine (C-C motif) ligand 12	2e-44	Ccl12	C-C motif chemokine 12
Slc25a22	11.0531	2124.73	0.000259682	21.2373	0	21	0	-	rno:309111	solute carrier family 25 (mitochondrial carrier, glutamate), member 22	0	Slc25a22	Mitochondrial glutamate carrier 1
LOC103694402	-2.37242	0.193121	0.000260902	10.113	52.4078	10	53	+		uncharacterized LOC103694402
Adamts9	-2.05436	0.240755	0.000267585	16.1808	67.2402	16	68	-	rno:312566	ADAM metallopeptidase with thrombospondin type 1 motif, 9	0	Adamts9	Protein Adamts9
Itgb8	-1.33176	0.397283	0.000272458	95.0622	239.296	94	242	-	rno:362800	integrin, beta 8	0	Itgb8	Integrin beta
Nadk2	-1.25059	0.420275	0.000278079	144.616	344.112	143	348	+	rno:365699	NAD kinase 2, mitochondrial
Dok1	1.28413	2.43535	0.000282421	284.175	116.682	281	118	-	rno:312477	docking protein 1	2e-46	Dok2	Docking protein 2
Atxn3	-1.28943	0.409112	0.000283382	115.288	281.816	114	285	-	rno:60331	ataxin 3	8e-166	Atxn3	Ataxin-3
Slc2a6	1.21552	2.32225	0.000284449	415.644	178.978	411	181	-	rno:296600	solute carrier family 2 (facilitated glucose transporter), member 6	7e-34	Slc2a2	Solute carrier family 2, facilitated glucose transporter member 2
Tnr	-1.15329	0.449599	0.000287082	356.989	794.028	353	803	+	rno:25567	tenascin R	0	Tnr	Tenascin-R
Rsph6a	4.66233	25.3222	0.000293038	25.2825	0.988826	25	1	+	rno:292684	radial spoke head 6 homolog A (Chlamydomonas)	2e-127	Rsph6a	Radial spokehead-like 1
Cyp1b1	-2.92858	0.131344	0.000293579	5.0565	38.5642	5	39	-	rno:25426	cytochrome P450, family 1, subfamily b, polypeptide 1	0	Cyp1b1	Putative uncharacterized protein
Plekha1	-1.14963	0.450742	0.000294062	372.158	825.67	368	835	+	rno:361659	pleckstrin homology domain containing, family A (phosphoinositide binding specific) member 1	3e-180	Plekha1	Pleckstrin homology domain-containing family A member 1
LOC102554082	2.18909	4.56017	0.000294781	58.6554	12.8547	58	13	+		uncharacterized LOC102554082
LOC103690039	2.64958	6.27485	0.000297059	43.4859	6.92179	43	7	-		signal recognition particle subunit SRP68-like	2e-172	Srp68	Signal recognition particle subunit SRP68
Sp100	2.64958	6.27485	0.000297059	43.4859	6.92179	43	7	+	rno:363269	SP100 nuclear antigen	2e-88	Sp100	Nuclear autoantigen Sp-100
Il4r	1.1847	2.27317	0.000304189	514.752	226.441	509	229	+	rno:25084	interleukin 4 receptor	0	Il4ra	Il4ra protein
Adam15	1.11794	2.17037	0.000305209	1792.02	825.67	1772	835	-	rno:57025	ADAM metallopeptidase domain 15	0	Adam15	Disintegrin and metalloproteinase domain-containing protein 15
LOC103691928	2.29985	4.92408	0.000311624	53.5989	10.8771	53	11	+		ribonuclease T2 pseudogene
Ldlrad3	-2.08233	0.236133	0.00031611	15.1695	64.2737	15	65	-	rno:366138	low density lipoprotein receptor class A domain containing 3	3e-174	Ldlrad3	Low-density lipoprotein receptor class A domain-containing protein 3
Epha7	-1.18898	0.438612	0.000316404	219.452	500.346	217	506	+	rno:171287	Eph receptor A7	0	Epha7	Receptor protein-tyrosine kinase
Gpd2	-1.55232	0.340961	0.000336141	43.4859	127.559	43	129	+	rno:25062	glycerol-3-phosphate dehydrogenase 2, mitochondrial	0	Gpd2	Glycerol-3-phosphate dehydrogenase, mitochondrial
Xrn1	-1.1951	0.436756	0.000339497	201.249	460.793	199	466	+	rno:300944	5'-3' exoribonuclease 1	0	Xrn1	5'-3' exoribonuclease 1
B2m	1.11075	2.15958	0.00034074	3444.49	1594.98	3406	1613	+	rno:24223	beta-2 microglobulin	1e-58	B2m	Beta-2-microglobulin
Mrc1	1.1878	2.27805	0.000341174	475.311	208.642	470	211	+	rno:291327	mannose receptor, C type 1	0	Mrc1	Macrophage mannose receptor 1
Erbb4	-1.22303	0.428383	0.00034139	161.808	377.732	160	382	-	rno:59323	v-erb-b2 avian erythroblastic leukemia viral oncogene 4	0	Egfr	Truncated epidermal growth factor receptor
Mcph1	-1.35139	0.391915	0.00034239	82.9266	211.609	82	214	-	rno:306594	microcephalin 1	0	Mcph1	Microcephalin
Arpin	1.58062	2.99097	0.000360905	118.322	39.5531	117	40	-	rno:308765	actin-related protein 2/3 complex inhibitor	2e-128	2610034B18Rik	Arpin
Parg	-1.15434	0.449272	0.000366336	296.311	659.547	293	667	+	rno:83507	poly (ADP-ribose) glycohydrolase	0	Parg	Poly(ADP-ribose) glycohydrolase 63 kDa isoform
Smek2	-1.26519	0.416045	0.000372777	121.356	291.704	120	295	+	rno:360993	SMEK homolog 2, suppressor of mek1 (Dictyostelium)	0	Smek2	Serine/threonine-protein phosphatase 4 regulatory subunit 3B
Nans	1.10576	2.15212	0.000375739	2917.6	1355.68	2885	1371	+	rno:298071	N-acetylneuraminic acid synthase	0	Nans	Putative uncharacterized protein
Ash1l	-1.13094	0.45662	0.000377544	421.712	923.564	417	934	+	rno:310638	ash1 (absent, small, or homeotic)-like (Drosophila)	0	Ash1l	Histone-lysine N-methyltransferase ASH1L
LOC103694384	-2.21457	0.21545	0.000379697	12.1356	56.3631	12	57	+		uncharacterized LOC103694384
Icam2	2.91742	7.55492	0.000381757	37.4181	4.94413	37	5	-	rno:360647	intercellular adhesion molecule 2	2e-128	Icam2	Intercellular adhesion molecule 2
Cebpz	-1.13886	0.454119	0.000392752	352.944	777.218	349	786	-	rno:362686	CCAAT/enhancer binding protein zeta	0	Cebpz	CCAAT/enhancer-binding protein zeta
Bpifb4	-11.0207	0.00048134	0.000395155	0	20.7654	0	21	+	rno:499925	BPI fold containing family B, member 4	0	Bpifb4	BPI fold-containing family B member 4
Fignl1	-11.0207	0.00048134	0.000395155	0	20.7654	0	21	-	rno:289777	fidgetin-like 1	0	Fignl1	Fidgetin-like protein 1
RGD1311447	-11.0207	0.00048134	0.000395155	0	20.7654	0	21	+	rno:363276	LOC363276	1e-45	3110079O15Rik	Uncharacterized protein C2orf82 homolog
Tmc5	-11.0207	0.00048134	0.000395155	0	20.7654	0	21	+	rno:365360	transmembrane channel-like 5	0	Tmc5	Transmembrane channel-like protein 5
LOC102552208	-11.0207	0.00048134	0.000395155	0	20.7654	0	21	-		uncharacterized LOC102552208
Trabd2b	-11.0207	0.00048134	0.000395155	0	20.7654	0	21	+	rno:689914	TraB domain containing 2B	0	Trabd2b	Metalloprotease TIKI2
Nek4	-1.42686	0.371939	0.000411628	60.678	163.156	60	165	+	rno:306252	NIMA-related kinase 4	0	Nek4	Putative uncharacterized protein
Unc13d	1.59159	3.01382	0.000420342	113.266	37.5754	112	38	-	rno:192177	unc-13 homolog D (C. elegans)	0	Unc13d	Protein unc-13 homolog D
Zfp105	-1.26434	0.416289	0.000425707	117.311	281.816	116	285	+	rno:316096	zinc finger protein 105	5e-113	Zfp182	Zinc finger protein 182
Prr5l	1.78047	3.43538	0.000426556	84.9492	24.7207	84	25	-	rno:362171	proline rich 5 like	0	Prr5l	Proline-rich protein 5-like
Slc24a4	-1.73588	0.300225	0.000427709	27.3051	90.972	27	92	+	rno:314396	solute carrier family 24 (sodium/potassium/calcium exchanger), member 4	0	Slc24a4	Slc24a4 protein
Slc38a8	-2.41108	0.188015	0.000428271	9.1017	48.4525	9	49	-	rno:502208	solute carrier family 38, member 8	0	Slc38a8	Putative sodium-coupled neutral amino acid transporter 8
Cttn	1.28835	2.44249	0.000433093	248.78	101.849	246	103	-	rno:60465	cortactin	0	Cttn	Src substrate cortactin
Grm4	1.48641	2.80191	0.000435907	138.548	49.4413	137	50	-	rno:24417	glutamate receptor, metabotropic 4	0	Grm8	Glutamate receptor, metabotropic 8
Cep63	-1.5099	0.351134	0.000447731	46.5198	132.503	46	134	-	rno:300963	centrosomal protein 63	0	Cep63	Centrosomal protein of 63 kDa
Ngb	1.98871	3.96882	0.000447745	66.7458	16.81	66	17	-	rno:85382	neuroglobin	4e-83	Ngb	Neuroglobin
Pqlc3	1.55728	2.94298	0.000449193	119.333	40.5419	118	41	-	rno:298906	PQ loop repeat containing 3	1e-64	Pqlc3	PQ-loop repeat-containing protein 3
Rad17	-1.20221	0.434609	0.000454641	168.887	388.609	167	393	-	rno:310034	RAD17 homolog (S. pombe)	0	Rad17	RAD17 homolog (S. pombe)
Prox1	-1.18053	0.441189	0.000457311	200.237	453.871	198	459	+	rno:305066	prospero homeobox 1	0	Prox1	Prospero homeobox protein 1
LOC689959	2.41577	5.33604	0.00045915	47.5311	8.89944	47	9	-	rno:689959	hypothetical protein LOC689959	2e-59	2310030G06Rik	Uncharacterized protein C11orf52 homolog
LOC102550523	-3.09372	0.117138	0.000460919	4.0452	34.6089	4	35	+		fibrinogen silencer-binding protein-like	3e-158	Fsbp	Fibrinogen silencer-binding protein
Abcg2	-4.59782	0.0412969	0.000468279	1.0113	24.7207	1	25	+	rno:312382	ATP-binding cassette, subfamily G (WHITE), member 2	0	Abcg2	ATP-binding cassette sub-family G member 2
Ctsd	1.14268	2.2079	0.000469855	39365.9	17829.5	38926	18031	-	rno:171293	cathepsin D	0	Ctsd	Cathepsin D
Scimp	10.9827	2023.6	0.000473707	20.226	0	20	0	-	rno:691993	SLP adaptor and CSK interacting membrane protein
Ctse	10.9827	2023.6	0.000473707	20.226	0	20	0	+	rno:25424	cathepsin E	0	Ctse	Cathepsin E
Cidea	10.9827	2023.6	0.000473707	20.226	0	20	0	+	rno:291541	cell death-inducing DFFA-like effector a	8e-118	Cidea	Cell death activator CIDE-A
Podnl1	10.9827	2023.6	0.000473707	20.226	0	20	0	+	rno:288907	podocan-like 1	0	Podnl1	Podocan-like protein 1
LOC100910201	10.9827	2023.6	0.000473707	20.226	0	20	0	-		uncharacterized LOC100910201
RGD1559575	10.9827	2023.6	0.000473707	20.226	0	20	0	-	rno:287231	similar to novel protein	0	9930111J21Rik1	Protein 9930111J21Rik1
Slc22a4	10.9827	2023.6	0.000473707	20.226	0	20	0	-	rno:64037	solute carrier family 22 (organic cation/zwitterion transporter), member 4	0	Slc22a4	Solute carrier family 22 member 4
Ppil4	-1.2449	0.421936	0.000474775	126.412	299.614	125	303	+	rno:361449	peptidylprolyl isomerase (cyclophilin)-like 4	0	Ppil4	Peptidyl-prolyl cis-trans isomerase-like 4
Sgk494	-1.76626	0.293969	0.000475846	25.2825	86.0279	25	87	+	rno:685208	uncharacterized serine/threonine-protein kinase SgK494	0	BC030499	Uncharacterized serine/threonine-protein kinase SgK494
Ythdf3	-1.17739	0.442152	0.000486248	200.237	452.883	198	458	+	rno:361920	YTH domain family, member 3	0	Ythdf3	Ythdf3 protein
Fxyd2	1.09883	2.14181	0.000489183	1505.83	703.056	1489	711	+	rno:29639	FXYD domain-containing ion transport regulator 2	4e-32	Fxyd2	Sodium/potassium-transporting ATPase subunit gamma
Fstl5	-1.14256	0.452954	0.000490794	286.198	631.86	283	639	+		follistatin-like 5	0	Fstl5	Follistatin-related protein 5
Tuba1c	1.409	2.65552	0.000498537	162.819	61.3072	161	62	+	rno:300218	tubulin, alpha 1C	0	Tuba1c	Tubulin alpha-1C chain
Arl11	1.09467	2.13565	0.000504779	1771.8	829.625	1752	839	+	rno:364396	ADP-ribosylation factor-like 11	4e-90	Arl11	ADP-ribosylation factor-like protein 11
Nfam1	1.10292	2.14789	0.000510792	1187.27	552.754	1174	559	-	rno:362966	NFAT activating protein with ITAM motif 1	2e-79	Nfam1	Nfam1 protein
Spon2	-2.31694	0.200693	0.00052479	10.113	50.4301	10	51	+	rno:171569	spondin 2, extracellular matrix protein	0	Spon2	Putative uncharacterized protein
Zfp35	-1.38802	0.382089	0.000532596	65.7345	172.056	65	174	+	rno:307547	zinc finger protein 35	0	Zfp35	Mszf20-1
Hipk3	-1.18992	0.438326	0.000541395	172.932	394.542	171	399	-	rno:83617	homeodomain interacting protein kinase 3	0	Hipk3	Homeodomain-interacting protein kinase 3
Lipe	1.17463	2.25735	0.00054173	430.814	190.844	426	193	-	rno:25330	lipase, hormone sensitive	0	Lipe	Hormone-sensitive lipase
Slc7a11	-1.54054	0.343758	0.000542574	41.4633	120.637	41	122	-	rno:310392	solute carrier family 7 (anionic amino acid transporter light chain, xc- system), member 11	0	Slc7a11	Putative uncharacterized protein
Rbpms	-2.58479	0.166686	0.000559619	7.0791	42.5195	7	43	+	rno:498642	RNA binding protein with multiple splicing	2e-107	Rbpms	Putative uncharacterized protein
St6gal2	-1.52924	0.346461	0.000561425	42.4746	122.614	42	124	+	rno:301155	ST6 beta-galactosamide alpha-2,6-sialyltranferase 2	8e-84	St6gal1	Beta-galactoside alpha-2,6-sialyltransferase 1
LOC100365935	-1.6397	0.320923	0.000562354	32.3616	100.86	32	102	-
Tgfbr3	-1.77451	0.292293	0.000567825	24.2712	83.0614	24	84	+	rno:29610	transforming growth factor, beta receptor III	0	Tgfbr3	Transforming growth factor beta receptor type 3
RGD1310819	2.13847	4.40295	0.000572511	56.6328	12.8547	56	13	-	rno:301351	similar to putative protein (5S487)	0	2010300C02Rik	Protein 2010300C02Rik
Tnrc6b	-1.09504	0.468122	0.000593726	623.972	1332.94	617	1348	+	rno:192178	trinucleotide repeat containing 6B	0	Tnrc6b	Tnrc6b protein
Nphp3	-1.92635	0.263093	0.000594912	18.2034	69.2179	18	70	+	rno:363126	nephronophthisis 3 (adolescent)	0	Nphp3	Nephrocystin-3
Fbln2	-1.08647	0.470914	0.000608412	1312.67	2787.5	1298	2819	+	rno:282583	fibulin 2	0	Fbln2	Fibulin-2
Pycr1	1.17128	2.25211	0.000614594	418.678	185.899	414	188	-	rno:287877	pyrroline-5-carboxylate reductase 1	5e-175	Pycr1	Pyrroline-5-carboxylate reductase 1, mitochondrial
LOC102551806	-2.23505	0.212414	0.000626508	11.1243	52.4078	11	53	-		uncharacterized LOC102551806	1e-27	Rpl8	60S ribosomal protein L8
Hdac1l	-3.76834	0.0733866	0.000634322	2.0226	27.6871	2	28	-	rno:84576	histone deacetylase 1-like	0	Hdac2	Histone deacetylase 2
Slc4a7	-1.22307	0.428369	0.000642975	130.458	304.559	129	308	-	rno:117955	solute carrier family 4, sodium bicarbonate cotransporter, member 7	0	Slc4a7	Solute carrier family 4 sodium bicarbonate cotransporter member 7 variant NBCn1-I
Rev3l	-1.11576	0.461449	0.000644369	345.865	749.53	342	758	+	rno:309812	REV3-like, polymerase (DNA directed), zeta, catalytic subunit	0	Rev3l	DNA polymerase
Shisa6	-1.88903	0.269989	0.000651541	19.2147	71.1955	19	72	-	rno:497926	shisa family member 6	0	Shisa6	Protein shisa-6 homolog
Nktr	-1.10506	0.464882	0.000654076	414.633	891.921	410	902	+		natural killer cell triggering receptor	1e-74	Ppig	Peptidyl-prolyl cis-trans isomerase G
Napepld	-1.78343	0.290493	0.000680716	23.2599	80.0949	23	81	+	rno:296757	N-acyl phosphatidylethanolamine phospholipase D	0	Napepld	N-acyl-phosphatidylethanolamine-hydrolyzing phospholipase D
Ryr3	-2.85265	0.138442	0.00068326	5.0565	36.5866	5	37	-	rno:170546	ryanodine receptor 3	0	Ryr3	Ryanodine receptor 3
Psma2	1.08415	2.12012	0.000684403	1406.72	663.503	1391	671	-	rno:29669	proteasome (prosome, macropain) subunit, alpha type 2	8e-138	Psma2	Proteasome subunit alpha type-2
Birc6	-1.0882	0.470349	0.000693683	608.802	1294.37	602	1309	-	rno:313876	baculoviral IAP repeat-containing 6	0	Birc6	Baculoviral IAP repeat-containing protein 6
Adam1a	-1.41066	0.37614	0.000702147	57.6441	153.268	57	155	+	rno:56777	a disintegrin and metallopeptidase domain 1a	0	Adam1a	Putative uncharacterized protein
Hist2h4	-10.9503	0.000505394	0.000707795	0	19.7765	0	20	-	rno:295277	histone cluster 2, H4	1e-52	Hist1h4a	histone cluster 1, H4a
LOC103692056	-10.9503	0.000505394	0.000707795	0	19.7765	0	20	-		uncharacterized LOC103692056
Catsperd	-10.9503	0.000505394	0.000707795	0	19.7765	0	20	-	rno:680264	catsper channel auxiliary subunit delta	0	Catsperd	Cation channel sperm-associated protein subunit delta
Ptpn22	-10.9503	0.000505394	0.000707795	0	19.7765	0	20	+	rno:295338	protein tyrosine phosphatase, non-receptor type 22 (lymphoid)	2e-117	Ptpn12	Tyrosine-protein phosphatase non-receptor type 12
Frem3	-10.9503	0.000505394	0.000707795	0	19.7765	0	20	-	rno:307767	FRAS1 related extracellular matrix 3	0	Frem3	FRAS1-related extracellular matrix protein 3
Stbd1	-10.9503	0.000505394	0.000707795	0	19.7765	0	20	-	rno:305234	starch binding domain 1	5e-154	Stbd1	Stbd1 protein
LOC102549281	-10.9503	0.000505394	0.000707795	0	19.7765	0	20	+		uncharacterized LOC102549281
LOC102552055	-10.9503	0.000505394	0.000707795	0	19.7765	0	20	-		angiopoietin-related protein 7-like	1e-54	Angpt1	Angiopoietin-1
Taok1	-1.3311	0.397464	0.000723574	75.8475	190.844	75	193	+	rno:286993	TAO kinase 1	0	Taok1	MCG124812
LOC499602	-2.16305	0.223283	0.000731903	12.1356	54.3855	12	55	+	rno:499602	hypothetical protein LOC499602	4e-166	3110057O12Rik	3110057O12Rik protein
Sv2c	-2.16305	0.223283	0.000731903	12.1356	54.3855	12	55	-	rno:29643	synaptic vesicle glycoprotein 2c	0	Sv2c	Sv2c protein
Kif9	-2.28837	0.204706	0.000743893	10.113	49.4413	10	50	+	rno:501059	kinesin family member 9	0	Kif9	Kif9 protein
Tenm2	-1.08142	0.472565	0.000753146	689.706	1459.51	682	1476	-	rno:117242	teneurin transmembrane protein 2	0	Tenm2	Teneurin-2
P2rx4	1.10725	2.15435	0.000756156	720.045	334.223	712	338	-	rno:29659	purinergic receptor P2X, ligand-gated ion channel 4	4e-175	P2rx4	P2X purinoceptor
Parp8	-1.34597	0.39339	0.000765316	70.791	179.966	70	182	-	rno:294762	poly (ADP-ribose) polymerase family, member 8	0	Parp8	ASL1/PARP8 fusion
Alpl	1.82943	3.55396	0.00077174	73.8249	20.7654	73	21	-	rno:25586	alkaline phosphatase, liver/bone/kidney	0	Alpl	Alkaline phosphatase, tissue-nonspecific isozyme
Asxl3	-1.13408	0.455624	0.000783521	239.678	526.056	237	532	+		additional sex combs like transcriptional regulator 3
LOC103694355	-1.57949	0.3346	0.000784901	35.3955	105.804	35	107	-		uncharacterized LOC103694355
Adam8	-1.41488	0.375042	0.000786708	55.6215	148.324	55	150	-	rno:499285	ADAM metallopeptidase domain 8	0	Adam8	Disintegrin and metalloproteinase domain-containing protein 8
Tmem56	-1.40799	0.376836	0.000802416	56.6328	150.302	56	152	-	rno:365924	transmembrane protein 56	3e-133	Tmem56	Transmembrane protein 56
Gmppb	1.18824	2.27874	0.000810818	335.752	147.335	332	149	+	rno:363145	GDP-mannose pyrophosphorylase B	0	Gmppb	Mannose-1-phosphate guanyltransferase beta
Rbl2	-1.12227	0.45937	0.000814223	267.994	583.408	265	590	-	rno:81758	retinoblastoma-like 2	0	Rbl2	Putative uncharacterized protein
Hspb1	1.22652	2.34002	0.000819642	273.051	116.682	270	118	-	rno:24471	heat shock protein B1	3e-112	Hspb1	Heat shock protein beta-1
Npr1	1.25677	2.3896	0.000822612	238.667	99.8715	236	101	-	rno:24603	natriuretic peptide receptor 1	0	Npr1	Atrial natriuretic peptide receptor 1
Ipp	-1.18052	0.441192	0.000847106	155.74	353.011	154	357	+	rno:298439	intracisternal A particle-promoted polypeptide	0	Ipp	Actin-binding protein IPP
Mmp12	10.9087	1922.47	0.000867506	19.2147	0	19	0	+	rno:117033	matrix metallopeptidase 12	0	Mmp12	Macrophage metalloelastase
Slamf6	10.9087	1922.47	0.000867506	19.2147	0	19	0	+	rno:498287	SLAM family member 6	1e-114	Slamf6	SLAM family member 6
LOC102553274	10.9087	1922.47	0.000867506	19.2147	0	19	0	+		uncharacterized LOC102553274
LOC102550216	10.9087	1922.47	0.000867506	19.2147	0	19	0	-		uncharacterized LOC102550216
Il33	-1.96692	0.255799	0.000869062	16.1808	63.2849	16	64	+	rno:361749	interleukin 33	2e-132	Il33	Interleukin-33
RGD1565866	-2.35097	0.196014	0.000881252	9.1017	46.4748	9	47	-	rno:314740	similar to FLJ44112 protein	0	Cfap54	Protein Cfap54
Zfp638	-1.37079	0.386679	0.000891876	62.7006	162.168	62	164	+	rno:312491	zinc finger protein 638	0	Zfml	Zinc finger protein 638
Csf1	1.09396	2.1346	0.000893122	774.656	362.899	766	367	-	rno:78965	colony stimulating factor 1 (macrophage)	0	Csf1	Macrophage colony-stimulating factor 1
C1r	1.21396	2.31974	0.000898293	282.153	121.626	279	123	+	rno:312705	complement component 1, r subcomponent	0	C1ra	Putative uncharacterized protein
Rps25	1.07787	2.11091	0.000899866	7695.99	3645.8	7610	3687	+	rno:122799	ribosomal protein s25	4e-66	Rps25	40S ribosomal protein S25
LOC102548778	1.24866	2.3762	0.00091563	239.678	100.86	237	102	-		poly [ADP-ribose] polymerase 10-like	0	Parp10	Protein Parp10
Hlx	1.25064	2.37947	0.000916401	237.655	99.8715	235	101	-	rno:364069	H2.0-like homeobox	0	Hlx	H2.0-like homeobox protein
Exoc3l2	2.83727	7.14666	0.000917522	35.3955	4.94413	35	5	+	rno:686809	exocyst complex component 3-like 2	0	Exoc3l2	Protein Exoc3l2
Dhrs11	1.30284	2.46714	0.000927118	195.181	79.1061	193	80	-	rno:360583	dehydrogenase/reductase (SDR family) member 11	2e-75	Dhrs11	Dehydrogenase/reductase SDR family member 11
Npas4	1.70663	3.26398	0.000936649	83.9379	25.7095	83	26	-	rno:266734	neuronal PAS domain protein 4	0	Npas4	Neuronal PAS domain protein 4
Cd300lf	1.70663	3.26398	0.000936649	83.9379	25.7095	83	26	-	rno:287818	Cd300 molecule-like family member F	6e-96	Cd300lf	CMRF35-like molecule 1
Slc15a2	-1.11169	0.462751	0.000938697	279.119	603.184	276	610	+	rno:60577	solute carrier family 15 (oligopeptide transporter), member 2	0	Slc15a2	Solute carrier family 15 member 2
Nrxn1	-1.09164	0.469228	0.000944059	377.215	803.916	373	813	-	rno:60391	neurexin 1	0	Nrxn1	Neurexin-1-beta
Trem2	1.06279	2.08897	0.000951982	2524.2	1208.35	2496	1222	-	rno:301227	triggering receptor expressed on myeloid cells 2	4e-112	Trem2	Putative uncharacterized protein
Arl13b	-1.39192	0.381057	0.000952477	57.6441	151.29	57	153	-	rno:304037	ADP-ribosylation factor-like 13B	2e-126	Arl13b	ADP-ribosylation factor-like protein 13B
Lrrtm2	-1.2063	0.433378	0.000961402	126.412	291.704	125	295	-	rno:685472	leucine rich repeat transmembrane neuronal 2	0	Lrrtm2	Leucine-rich repeat transmembrane neuronal protein 2
Adamts6	-1.71564	0.304467	0.00098182	25.2825	83.0614	25	84	+		ADAM metallopeptidase with thrombospondin type 1 motif, 6	0	Adamts6	Protein Adamts6
Vwa2	-1.33466	0.396485	0.000986436	69.7797	176.011	69	178	+		von Willebrand factor A domain containing 2	0	Vwa2	von Willebrand factor A domain-containing protein 2
RGD1306353	-1.21609	0.430449	0.000993687	118.322	274.894	117	278	-	rno:305911	zinc finger, MYM-type 5	0	Zmym5	Putative uncharacterized protein
Adssl1	-2.13659	0.227417	0.0010154	12.1356	53.3966	12	54	+	rno:684425	adenylosuccinate synthase like 1	0	Adssl1	Adenylosuccinate synthetase isozyme 1
Pigw	-2.42556	0.186137	0.00103922	8.0904	43.5084	8	44	-	rno:378774	phosphatidylinositol glycan anchor biosynthesis, class W	0	Pigw	Phosphatidylinositol-glycan biosynthesis class W protein
Peg12	1.3892	2.61933	0.00105555	147.65	56.3631	146	57	-	rno:308692	paternally expressed 12	9e-99	Frat1	Proto-oncogene FRAT1
Atxn1	-1.19969	0.435369	0.0010564	127.424	292.693	126	296	+	rno:25049	ataxin 1	0	Atxn1	Ataxin-1
LOC102551789	-1.99071	0.251614	0.00105719	15.1695	60.3184	15	61	-		uncharacterized LOC102551789
Tead1	-1.07284	0.475384	0.00106103	507.672	1067.93	502	1080	+	rno:361630	TEA domain family member 1	0	Tead1	Transcriptional enhancer factor TEF-1
Mapkapk3	1.0815	2.11623	0.00107218	816.119	385.642	807	390	-	rno:315994	mitogen-activated protein kinase-activated protein kinase 3	0	Mapkapk3	MAP kinase-activated protein kinase 3
Fbn2	-1.39551	0.38011	0.00107416	55.6215	146.346	55	148	-	rno:689008	fibrillin 2	0	Fbn2	MKIAA4226 protein
Emcn	3.72613	13.2336	0.00107919	26.2938	1.97765	26	2	+	rno:295490	endomucin	9e-76	Emcn	Putative uncharacterized protein
Xpr1	-1.06239	0.478837	0.00108581	744.317	1554.44	736	1572	-	rno:289424	xenotropic and polytropic retrovirus receptor 1	0	Xpr1	Xenotropic and polytropic retrovirus receptor 1
Pwwp2a	-1.14174	0.453212	0.00108875	189.113	417.285	187	422	+	rno:303060	PWWP domain containing 2A	3e-83	Pwwp2b	Protein Pwwp2b
Nfkb2	1.13239	2.19222	0.00109787	437.893	199.743	433	202	+	rno:309452	nuclear factor of kappa light polypeptide gene enhancer in B-cells 2, p49/p100	0	Nfkb2	Putative uncharacterized protein
Rgs1	2.08601	4.24573	0.00110947	54.6102	12.8547	54	13	-	rno:54289	regulator of G-protein signaling 1	3e-116	Rgs1	Regulator of G-protein-signaling 1
Plk1	1.08031	2.11449	0.00111246	804.995	380.698	796	385	+	rno:25515	polo-like kinase 1	0	Plk1	Polo like kinase
Zscan12	-1.16791	0.445065	0.00112441	152.706	343.123	151	347	-	rno:266716	zinc finger and SCAN domain containing 12	0	Zscan12	MKIAA0426 protein
Sspn	-1.32199	0.399983	0.00114126	70.791	177	70	179	+	rno:500364	sarcospan
Slfn2	1.12145	2.17565	0.0012225	456.096	209.631	451	212	+	rno:303380	schlafen 2	0	Slfn2	Schlafen 2
Mboat1	1.32853	2.51147	0.00122432	168.887	67.2402	167	68	-	rno:498741	membrane bound O-acyltransferase domain containing 1	0	Mboat1	Membrane bound O-acyltransferase domain containing 1
Nwd2	-2.17956	0.220743	0.00123035	11.1243	50.4301	11	51	-	rno:289633	NACHT and WD repeat domain containing 2	0	Nwd2	NACHT and WD repeat domain-containing protein 2
Il23a	-2.17956	0.220743	0.00123035	11.1243	50.4301	11	51	-	rno:155140	Interleukin 23, alpha subunit p19	7e-92	Il23a	Interleukin-23 subunit alpha
Zfp704	-1.05227	0.482209	0.00125882	1304.58	2705.43	1290	2736	+	rno:310233	zinc finger protein 704	0	Zfp704	Zinc finger protein 704
LOC103691267	-2.31995	0.200275	0.00126323	9.1017	45.486	9	46	+		uncharacterized LOC103691267
Cml5	-10.8763	0.00053198	0.00127245	0	18.7877	0	19	-	rno:114020	camello-like 5	4e-88	Cml5	Probable N-acetyltransferase CML5
LOC102547954	-10.8763	0.00053198	0.00127245	0	18.7877	0	19	-		uncharacterized LOC102547954
LOC102551730	-10.8763	0.00053198	0.00127245	0	18.7877	0	19	-		uncharacterized LOC102551730
LOC102551403	-10.8763	0.00053198	0.00127245	0	18.7877	0	19	-		ankyrin repeat and fibronectin type-III domain-containing protein 1-like
Fmo5	-10.8763	0.00053198	0.00127245	0	18.7877	0	19	+	rno:246248	flavin containing monooxygenase 5	0	Fmo5	Dimethylaniline monooxygenase [N-oxide-forming] 5
Fzd6	-10.8763	0.00053198	0.00127245	0	18.7877	0	19	+	rno:282581	frizzled class receptor 6	0	Fzd6	Putative uncharacterized protein
LOC102547160	-10.8763	0.00053198	0.00127245	0	18.7877	0	19	+		uncharacterized LOC102547160
Zfp958	-10.8763	0.00053198	0.00127245	0	18.7877	0	19	-	rno:100302405	zinc finger protein 958	0	Zfp958	Protein Zfp958
Greb1	-10.8763	0.00053198	0.00127245	0	18.7877	0	19	-		growth regulation by estrogen in breast cancer 1	0	Greb1l	GREB1-like protein
LOC102550291	-10.8763	0.00053198	0.00127245	0	18.7877	0	19	-		zinc finger protein 658-like	0	Gm10324	Protein Gm10324
LOC691921	-1.51382	0.350182	0.0012797	38.4294	109.76	38	111	+	rno:691921	hypothetical protein LOC691921	5e-30	1190007I07Rik	Uncharacterized protein C12orf73 homolog
Pdzd7	-1.78423	0.29033	0.00128827	21.2373	73.1732	21	74	-	rno:293996	PDZ domain containing 7	0	Pdzd7	Pdzd7 protein
Ccrl2	1.98279	3.95255	0.00130415	58.6554	14.8324	58	15	-	rno:316019	chemokine (C-C motif) receptor-like 2	4e-174	Ccrl2	C-C chemokine receptor-like 2
Tgfbr3l	-4.47758	0.0448864	0.00136303	1.0113	22.743	1	23	-	rno:688681	transforming growth factor, beta receptor III-like	1e-111	Tgfbr3l	Protein Tgfbr3l
LOC103694585	-4.47758	0.0448864	0.00136303	1.0113	22.743	1	23	+		uncharacterized LOC103694585
LOC102552779	-4.47758	0.0448864	0.00136303	1.0113	22.743	1	23	-		uncharacterized LOC102552779
LOC102554723	-4.47758	0.0448864	0.00136303	1.0113	22.743	1	23	+		uncharacterized LOC102554723
Vipr2	-1.75562	0.296146	0.00136665	22.2486	75.1508	22	76	+	rno:29555	vasoactive intestinal peptide receptor 2	0	Vipr2	Vasoactive intestinal polypeptide receptor 2
Klf7	-1.09051	0.469594	0.00137478	284.175	605.162	281	612	-	rno:363243	Kruppel-like factor 7 (ubiquitous)
Iqgap2	-1.16017	0.44746	0.00138772	148.661	332.246	147	336	-	rno:100360623	IQ motif containing GTPase activating protein 2	0	Iqgap2	IQ motif containing GTPase activating protein 2
Btg3	-1.33377	0.396731	0.00140425	64.7232	163.156	64	165	-	rno:54230	BTG family, member 3	2e-144	Btg3	B cell translocation gene 3
Dscc1	-2.62855	0.161706	0.0014046	6.0678	37.5754	6	38	-	rno:299933	DNA replication and sister chromatid cohesion 1	1e-130	Dscc1	Protein Dscc1
Ccl7	2.79546	6.94253	0.00142212	34.3842	4.94413	34	5	+	rno:287561	chemokine (C-C motif) ligand 7	9e-42	Ccl7	C-C motif chemokine 7
Inpp5b	-1.38924	0.381766	0.00142602	53.5989	140.413	53	142	+	rno:362590	inositol polyphosphate-5-phosphatase B	0	Ocrl	Inositol polyphosphate 5-phosphatase OCRL-1
Slc30a10	-1.45046	0.365906	0.00145874	44.4972	121.626	44	123	+	rno:289353	solute carrier family 30, member 10	0	Slc30a10	Zinc transporter 10
LOC103694118	-1.82764	0.281726	0.00147724	19.2147	68.229	19	69	-		uracil-DNA glycosylase pseudogene
Hey2	-2.22949	0.213234	0.00149232	10.113	47.4637	10	48	+	rno:155430	hes-related family bHLH transcription factor with YRPW motif 2	4e-164	Hey2	Hairy/enhancer-of-split related with YRPW motif 2
LOC690437	-1.42403	0.372671	0.0015363	47.5311	127.559	47	129	+	rno:690437	hypothetical protein LOC690437	1e-180	Catip	Ciliogenesis-associated TTC17-interacting protein
RGD1307830	-1.28554	0.410217	0.00154974	75.8475	184.911	75	187	-	rno:304863	similar to cDNA sequence BC003331	0	BC003331	Protein odr-4 homolog
Tmem106a	1.65221	3.14314	0.00156048	83.9379	26.6983	83	27	+	rno:287722	transmembrane protein 106A	2e-137	Tmem106a	Transmembrane protein 106A
Cd180	1.13773	2.20034	0.00156943	359.011	163.156	355	165	+	rno:294706	CD180 molecule	0	Cd180	CD180 antigen
Dcaf10	-1.27811	0.412335	0.00157265	77.8701	188.866	77	191	+	rno:313242	DDB1 and CUL4 associated factor 10	0	Dcaf10	DDB1- and CUL4-associated factor 10
Morn3	-1.79489	0.288194	0.00157575	20.226	70.2067	20	71	+	rno:687615	MORN repeat containing 3	7e-133	Morn3	MORN repeat-containing protein 3
Fam3b	10.8308	1821.34	0.00159473	18.2034	0	18	0	-	rno:304050	family with sequence similarity 3, member B	2e-127	Fam3b	Protein FAM3B
LOC103694218	10.8308	1821.34	0.00159473	18.2034	0	18	0	-		glyceraldehyde-3-phosphate dehydrogenase pseudogene
MGC105567	10.8308	1821.34	0.00159473	18.2034	0	18	0	+	rno:498873	similar to cDNA sequence BC023105	1e-127	F830016B08Rik	Protein F830016B08Rik
Ptges	10.8308	1821.34	0.00159473	18.2034	0	18	0	-	rno:59103	prostaglandin E synthase	4e-82	Ptges	Putative uncharacterized protein
LOC103691169	10.8308	1821.34	0.00159473	18.2034	0	18	0	+		uncharacterized LOC103691169
Sox6	-1.08863	0.470208	0.00162789	259.904	552.754	257	559	+	rno:293165	SRY (sex determining region Y)-box 6	0	Sox6	Transcription factor SOX-6
Emb	1.1669	2.24529	0.00164228	295.3	131.514	292	133	+	rno:114511	embigin	5e-151	Emb	Embigin
Zfp347	-1.76461	0.294307	0.00167096	21.2373	72.1843	21	73	-	rno:170902	zinc finger protein 347	0	Zfp808	Protein Zfp808
N4bp3	-3.66146	0.0790296	0.0017161	2.0226	25.7095	2	26	-	rno:303112	Nedd4 binding protein 3	0	N4bp3	NEDD4-binding protein 3
Dctn3l1	-2.96447	0.128116	0.00174242	4.0452	31.6424	4	32	-	rno:498977	dynactin 3-like 1
LOC100911949	3.25047	9.51674	0.0017963	28.3164	2.96648	28	3	-		uncharacterized LOC100911949	8e-43	Gm1045	Protein Gm1045
Apol9a	3.25047	9.51674	0.0017963	28.3164	2.96648	28	3	-	rno:503164	apolipoprotein L 9a	3e-128	Apol9a	Apol9b protein
RT1-CE4	3.25047	9.51674	0.0017963	28.3164	2.96648	28	3	-	rno:414783	RT1 class I, locus CE4	6e-129	Gm10499	predicted gene 10499
LOC102551271	-3.23635	0.106111	0.00181065	3.0339	28.676	3	29	-		uncharacterized LOC102551271
Abca1	-1.04036	0.486205	0.00183534	605.769	1245.92	599	1260	-	rno:313210	ATP-binding cassette, subfamily A (ABC1), member 1	0	Abca1	ATP-binding cassette sub-family A member 1
RGD1305807	-1.71037	0.305581	0.00185081	23.2599	76.1396	23	77	+	rno:298077	hypothetical LOC298077	0	Stra6l	Protein Stra6l
Rasa1	-1.14517	0.452137	0.00187811	146.638	324.335	145	328	-	rno:25676	RAS p21 protein activator (GTPase activating protein) 1	0	Rasa1	Protein Rasa1
LOC103694406	-2.08215	0.236163	0.00195034	12.1356	51.419	12	52	-		uncharacterized LOC103694406
Haus4	1.11417	2.16471	0.00196679	385.305	177.989	381	180	-	rno:305882	HAUS augmin-like complex, subunit 4	0	Haus4	HAUS augmin-like complex subunit 4
Hectd1	-1.034	0.488354	0.00204201	633.074	1296.35	626	1311	-	rno:362736	HECT domain containing E3 ubiquitin protein ligase 1	0	Hectd1	E3 ubiquitin-protein ligase HECTD1
Cyb561a3	1.22109	2.33123	0.00204616	214.396	91.9609	212	93	+	rno:361729	cytochrome b561 family, member A3	4e-125	Cyb561a3	Cytochrome b ascorbate-dependent protein 3
Golga4	-1.03189	0.489071	0.00207585	676.56	1383.37	669	1399	+	rno:501069	golgin A4
Apip	-1.64181	0.320455	0.00209298	26.2938	82.0726	26	83	+	rno:295961	APAF1 interacting protein
Nlrp3	1.42301	2.68144	0.00209342	119.333	44.4972	118	45	+	rno:287362	NLR family, pyrin domain containing 3	0	Nlrp3	NACHT, LRR and PYD domains-containing protein 3
LOC100910827	-1.03404	0.488341	0.00214452	568.35	1163.85	562	1177	+		uncharacterized LOC100910827
Inf2	1.07015	2.09965	0.00218259	548.124	261.05	542	264	+	rno:362790	inverted formin, FH2 and WH2 domain containing	0	Inf2	Inverted formin-2
Nid1	-1.07189	0.475697	0.00218632	262.938	552.754	260	559	-	rno:25494	nidogen 1	0	Nid1	Nidogen-1
LOC102547086	-2.35846	0.194999	0.00218948	8.0904	41.5307	8	42	-		serine/threonine-protein phosphatase 2A 56 kDa regulatory subunit alpha isoform-like
Cyp7b1	-1.71715	0.304149	0.00227186	22.2486	73.1732	22	74	-	rno:25429	cytochrome P450, family 7, subfamily b, polypeptide 1	0	Cyp7b1	Putative uncharacterized protein
LOC100911923	-10.7984	0.000561518	0.0022956	0	17.7989	0	18	-		uncharacterized LOC100911923
LOC102551340	-10.7984	0.000561518	0.0022956	0	17.7989	0	18	-		zinc finger protein 728-like	0	A530054K11Rik	Uncharacterized protein
LOC102551479	-10.7984	0.000561518	0.0022956	0	17.7989	0	18	+		ras-related protein Rab-12-like
Frzb	-10.7984	0.000561518	0.0022956	0	17.7989	0	18	-	rno:295691	frizzled-related protein	0	Frzb	Secreted frizzled-related protein 3
3082ex4-5	-10.7984	0.000561518	0.0022956	0	17.7989	0	18	-		RT1 class pseudogene 3082ex4-5
Vsig8	-10.7984	0.000561518	0.0022956	0	17.7989	0	18	+	rno:289236	V-set and immunoglobulin domain containing 8	0	Vsig8	V-set and immunoglobulin domain-containing protein 8
Il34	-10.7984	0.000561518	0.0022956	0	17.7989	0	18	+	rno:498951	interleukin 34	4e-75	Il34	Interleukin-34
LOC682225	-10.7984	0.000561518	0.0022956	0	17.7989	0	18	-	rno:682225	similar to zinc finger protein 665
Laptm5	1.02364	2.03304	0.00230207	3809.57	1873.83	3767	1895	+	rno:89783	lysosomal protein transmembrane 5
LOC103694909	-4.41348	0.0469257	0.00233147	1.0113	21.7542	1	22	-		low affinity immunoglobulin gamma Fc region receptor III-like
Tpd52l1	-4.41348	0.0469257	0.00233147	1.0113	21.7542	1	22	+	rno:689256	tumor protein D52-like 1	7e-106	Tpd52l1	Tpd52l1 protein
Lcp2	1.13256	2.19248	0.00233232	316.537	144.369	313	146	+	rno:155918	lymphocyte cytosolic protein 2	0	Lcp2	Lymphocyte cytosolic protein 2
Kctd4	-1.22772	0.426992	0.0023471	86.9718	203.698	86	206	+	rno:691835	potassium channel tetramerization domain containing 4	3e-149	Kctd4	BTB/POZ domain-containing protein KCTD4
Tor4a	1.12091	2.17484	0.00235248	339.797	156.235	336	158	-	rno:311795	torsin family 4, member A	0	Tor4a	Torsin-4A
Lypd6b	-1.96682	0.255816	0.00238939	14.1582	55.3743	14	56	+	rno:362133	LY6/PLAUR domain containing 6B	1e-91	Lypd6b	Ly6/PLAUR domain-containing protein 6B
Unc5d	-1.11639	0.461245	0.00241479	162.819	353.011	161	357	+	rno:306534	unc-5 homolog D (C. elegans)	0	Unc5d	Unc5d protein
LOC102555457	1.67586	3.1951	0.00242685	75.8475	23.7318	75	24	-		engulfment and cell motility protein 2-like	0	Elmo2	Engulfment and cell motility protein 2
Pcp4l1	1.65495	3.14913	0.00246304	77.8701	24.7207	77	25	-	rno:685448	Purkinje cell protein 4-like 1	2e-25	Pcp4l1	Purkinje cell protein 4-like protein 1
Ralgapa1	-1.0993	0.466744	0.00247106	185.068	396.519	183	401	-	rno:56785	Ral GTPase activating protein, alpha subunit 1 (catalytic)	0	Ralgapa1	Garnl1 protein
Tbc1d12	-1.78521	0.290134	0.00254063	19.2147	66.2514	19	67	+		TBC1 domain family, member 12	0	Tbc1d12	Tbc1d12 protein
Ier3	1.15889	2.23285	0.00254143	264.961	118.659	262	120	-	rno:294235	immediate early response 3
Nfe2l3	2.12656	4.36674	0.00255254	47.5311	10.8771	47	11	+	rno:312331	nuclear factor, erythroid 2-like 3	0	Nfe2l3	Nuclear factor erythroid 2-related factor 3
Aqp1	1.88974	3.70568	0.00255402	58.6554	15.8212	58	16	+	rno:25240	aquaporin 1	1e-152	Aqp1	Aquaporin-1
Myo1f	1.01521	2.02119	0.00256557	1938.66	959.162	1917	970	+	rno:314654	myosin IF	0	Myo1f	Unconventional myosin-If
Ubxn10	1.45173	2.73536	0.00256716	108.209	39.5531	107	40	-	rno:298577	UBX domain protein 10	5e-133	Ubxn10	Putative uncharacterized protein
Elk3	1.07242	2.10296	0.00258927	480.367	228.419	475	231	-	rno:362871	ELK3, member of ETS oncogene family	1e-46	Elk1	Elk-1
Trem3	2.93614	7.65363	0.00259269	30.339	3.95531	30	4	-	rno:367215	triggering receptor expressed on myeloid cells 3	3e-66	Trem3	Protein Trem3
LOC103689965	-1.91797	0.264627	0.00259704	15.1695	57.3519	15	58	-		complement C4-like	9e-176	C3	Complement component 3d
Nrros	1.07819	2.11139	0.00259971	453.062	214.575	448	217	+	rno:303875	negative regulator of reactive oxygen species	0	Nrros	Negative regulator of reactive oxygen species
Nfs1	4.4109	21.2723	0.00268574	21.2373	0.988826	21	1	-	rno:84594	NFS1 nitrogen fixation 1 homolog (S. cerevisiae)	0	Nfs1	Cysteine desulfurase, mitochondrial
Gabrb1	-2.91868	0.132248	0.00271362	4.0452	30.6536	4	31	-	rno:25450	gamma-aminobutyric acid (GABA) A receptor, beta 1	0	Gabrb1	Gamma-aminobutyric acid receptor subunit beta-1
Afap1l1	1.19088	2.28293	0.00272023	223.497	97.8938	221	99	-	rno:291565	actin filament associated protein 1-like 1	0	Afap1l1	Actin filament associated protein 1-like 1
Zfhx4	-1.13744	0.454564	0.00274782	133.492	293.681	132	297	-	rno:310250	zinc finger homeobox 4	0	Zfhx4	Zinc finger homeobox protein 4
Fam169b	2.06124	4.17346	0.00277416	49.5537	11.8659	49	12	+	rno:680906	family with sequence similarity 169, member B	4e-165	Fam169b	Protein FAM169B
Ptafr	1.11431	2.16492	0.00280836	329.684	152.279	326	154	+	rno:58949	platelet-activating factor receptor	0	Ptafr	Platelet activating factor receptor
Rassf4	1.11536	2.16649	0.00284628	325.639	150.302	322	152	-	rno:362423	Ras association (RalGDS/AF-6) domain family member 4	2e-166	Rassf4	Ras association domain-containing protein 4
Pdcl	-1.06667	0.477421	0.00287067	234.622	491.447	232	497	-	rno:64013	phosducin-like	1e-172	Pdcl	Phosducin-like protein
Sesn3	-1.06544	0.477825	0.00287483	237.655	497.38	235	503	+	rno:315427	sestrin 3	0	Sesn3	Sestrin 3
Zbtb38	-1.06158	0.479108	0.00288899	247.768	517.156	245	523	-	rno:315936	zinc finger and BTB domain containing 38	0	Zbtb38	Protein Zbtb38
Hfm1	-3.18574	0.109899	0.00289167	3.0339	27.6871	3	28	+	rno:690161	HFM1, ATP-dependent DNA helicase homolog (S. cerevisiae)	0	Hfm1	Hfm1 protein
Zc3h11a	-1.01187	0.495905	0.00289417	891.966	1798.68	882	1819	+	rno:360845	zinc finger CCCH-type containing 11A	0	Zc3h11a	Zinc finger CCCH domain-containing protein 11A
Ifi27l2b	10.7484	1720.21	0.00294206	17.1921	0	17	0	-	rno:299269	interferon, alpha-inducible protein 27 like 2B	2e-20	Ifi27l2a	Interferon alpha-inducible protein 27-like protein 2A
LOC685158	10.7484	1720.21	0.00294206	17.1921	0	17	0	-		similar to CG8138-PA	3e-40	1700007G11Rik	Uncharacterized protein C4orf22 homolog
Galnt3	10.7484	1720.21	0.00294206	17.1921	0	17	0	-	rno:366061	polypeptide N-acetylgalactosaminyltransferase 3	0	Galnt3	Polypeptide N-acetylgalactosaminyltransferase 3
Rbp2	10.7484	1720.21	0.00294206	17.1921	0	17	0	+	rno:24710	retinol binding protein 2, cellular	2e-73	Rbp2	Retinol binding protein 2, cellular
Stap1	10.7484	1720.21	0.00294206	17.1921	0	17	0	-	rno:305269	signal transducing adaptor family member 1	1e-130	Stap1	Stap1 protein
Pax8	10.7484	1720.21	0.00294206	17.1921	0	17	0	-	rno:81819	paired box 8	0	Pax8	Paired box protein Pax-8
LOC102552794	10.7484	1720.21	0.00294206	17.1921	0	17	0	+		proline-rich nuclear receptor coactivator 1-like
Pifo	10.7484	1720.21	0.00294206	17.1921	0	17	0	-	rno:691223	primary cilia formation	1e-122	Pifo	Protein pitchfork
LOC102554945	10.7484	1720.21	0.00294206	17.1921	0	17	0	+		uncharacterized LOC102554945
Smim24	2.00356	4.0099	0.0029748	51.5763	12.8547	51	13	-	rno:100366121	small integral membrane protein 24	7e-39	Smim24	Small integral membrane protein 24
LOC100910366	3.6107	12.216	0.00303284	24.2712	1.97765	24	2	+		uncharacterized LOC100910366	3e-74	Hist1h3b	histone cluster 1, H3b
Chd9	-1.05954	0.479784	0.00303535	245.746	512.212	243	518	-		chromodomain helicase DNA binding protein 9	0	Chd9	Chd9 protein
Naa16	-1.67241	0.313729	0.00303936	23.2599	74.162	23	75	-	rno:686240	N(alpha)-acetyltransferase 16, NatA auxiliary subunit	0	Naa16	N-alpha-acetyltransferase 16, NatA auxiliary subunit
Tm6sf1	1.3053	2.47134	0.00308334	146.638	59.3296	145	60	+	rno:361600	transmembrane 6 superfamily member 1	0	Tm6sf1	Transmembrane 6 superfamily member 1, isoform CRA_d
Smpdl3a	1.03689	2.05179	0.00312672	651.277	317.413	644	321	+	rno:294422	sphingomyelin phosphodiesterase, acid-like 3A	0	Smpdl3a	Acid sphingomyelinase-like phosphodiesterase 3a
Eva1b	1.2547	2.38617	0.00313292	169.898	71.1955	168	72	+	rno:362597	eva-1 homolog B	2e-108	Eva1b	Protein eva-1 homolog B
Tyrobp	1.00679	2.00944	0.00314416	3216.94	1600.91	3181	1619	+	rno:361537	Tyro protein tyrosine kinase binding protein	1e-56	Tyrobp	TYRO protein tyrosine kinase-binding protein
Cdc14a	-1.649	0.318862	0.00314586	24.2712	76.1396	24	77	-	rno:310806	cell division cycle 14A	0	Cdc14a	Dual specificity protein phosphatase CDC14A
Slc27a5	-1.79709	0.287755	0.0031607	18.2034	63.2849	18	64	+	rno:79111	solute carrier family 27 (fatty acid transporter), member 5	0	Slc27a5	Bile acyl-CoA synthetase
Setx	-1.05301	0.481963	0.00319784	256.87	532.977	254	539	+	rno:362096	senataxin	0	Setx	Probable helicase senataxin
Cdk18	1.5991	3.02954	0.00319811	80.904	26.6983	80	27	-	rno:289019	cyclin-dependent kinase 18	5e-179	Cdk16	Cyclin-dependent kinase 16
Sfrp2	-1.04867	0.483415	0.003207	271.028	560.665	268	567	+	rno:310552	secreted frizzled-related protein 2	6e-173	Sfrp2	Secreted frizzled-related protein 2
LOC102548320	-1.48189	0.358019	0.00321453	35.3955	98.8826	35	100	+		zinc finger protein 845-like	0	Zfp619	Protein Zfp619
RT1-CE5	1.5113	2.85067	0.0032159	93.0396	32.6313	92	33	-	rno:309607	RT1 class I, locus CE5	3e-128	Gm10499	predicted gene 10499
Tmtc2	-1.28937	0.409129	0.00323342	62.7006	153.268	62	155	-	rno:299762	transmembrane and tetratricopeptide repeat containing 2	2e-107	Tmtc4	Transmembrane and TPR repeat-containing protein 4
Prkdc	-1.20402	0.434063	0.00330225	87.9831	202.709	87	205	-		protein kinase, DNA activated, catalytic polypeptide	0	Prkdc	DNA-dependent protein kinase catalytic subunit
Gucy1b2	2.16879	4.49646	0.00330926	44.4972	9.88826	44	10	-	rno:25206	guanylate cyclase 1, soluble, beta 2	0	Gucy1b2	Gucy1b2 protein
Zfp266	-1.00453	0.498431	0.00331708	1169.06	2345.5	1156	2372	-	rno:367034	zinc finger protein 266	0	Zfp266	Protein Zfp266
LOC690120	-2.09212	0.234536	0.0033667	11.1243	47.4637	11	48	-		hypothetical protein LOC690120
RGD1564149	2.70802	6.53426	0.00341063	32.3616	4.94413	32	5	-	rno:499419	similar to Protein C21orf58	3e-112	2610028H24Rik	Protein 2610028H24Rik
Arhgap12	-1.08816	0.470359	0.00341951	173.944	369.821	172	374	+	rno:307016	Rho GTPase activating protein 12	0	Arhgap12	Rho GTPase-activating protein 12
RGD1305089	-1.10503	0.464892	0.00346848	151.695	326.313	150	330	+	rno:299050	similar to 1110008L16Rik protein	0	1110008L16Rik	Mitochondrial ribonuclease P protein 3
Sh3tc1	1.16359	2.24014	0.00352331	232.599	103.827	230	105	+	rno:305441	SH3 domain and tetratricopeptide repeats 1	0	Sh3tc1	Sh3tc1 protein
Irgm	1.37246	2.58912	0.00352902	120.345	46.4748	119	47	-	rno:303090	immunity-related GTPase family, M	2e-47	9930111J21Rik1	Protein 9930111J21Rik1
Stxbp2	1.04328	2.06091	0.00357436	538.011	261.05	532	264	+	rno:81804	syntaxin binding protein 2	0	Stxbp2	Syntaxin-binding protein 2
Htr1b	-1.70407	0.306918	0.0036291	21.2373	69.2179	21	70	-	rno:25075	5-hydroxytryptamine (serotonin) receptor 1B, G protein-coupled	0	Htr1b	5-hydroxytryptamine receptor 1B
RGD1560436	-1.20195	0.434688	0.00370213	85.9605	197.765	85	200	+	rno:500546	similar to hypothetical protein FLJ20508	8e-99	9930104L06Rik	Uncharacterized protein C1orf109 homolog
Sost	-2.22267	0.214244	0.00370301	9.1017	42.5195	9	43	-	rno:80722	sclerostin	7e-115	Sost	Sclerostin
Syne2	-0.998907	0.500379	0.00374473	1312.67	2623.36	1298	2653	+		spectrin repeat containing, nuclear envelope 2	0	Syne2	Nesprin-2
Cd86	1.31237	2.4835	0.00376241	137.537	55.3743	136	56	+	rno:56822	CD86 molecule	5e-13	Cd80	T-lymphocyte activation antigen CD80
Hectd2	-1.67763	0.312597	0.00376442	22.2486	71.1955	22	72	+		HECT domain containing E3 ubiquitin protein ligase 2	0	Hectd2	Probable E3 ubiquitin-protein ligase HECTD2
Pik3cg	1.15507	2.22694	0.00382079	235.633	105.804	233	107	-		phosphatidylinositol-4,5-bisphosphate 3-kinase, catalytic subunit gamma	0	Pik3cg	Phosphoinositide-3-kinase gamma polypeptide
Stox2	-0.997962	0.500707	0.00383835	831.288	1660.24	822	1679	+	rno:306459	storkhead box 2	0	Stox2	Storkhead-box protein 2
Bcl2a1	1.73235	3.32269	0.00384136	65.7345	19.7765	65	20	+	rno:170929	BCL2-related protein A1	5e-90	Bcl2a1d	Protein Bcl2a1d
LOC100361830	2.0315	4.08831	0.00388409	48.5424	11.8659	48	12	-	rno:100361830	translocating chain-associating membrane protein 2	0	Tram2	Translocating chain-associated membrane protein 2
Tnfsf9	1.47273	2.77546	0.00393357	96.0735	34.6089	95	35	-	rno:353218	tumor necrosis factor (ligand) superfamily, member 9	3e-138	Tnfsf9	Tumor necrosis factor ligand superfamily member 9
Cd33	1.06013	2.08512	0.00393985	424.746	203.698	420	206	+	rno:690492	CD33 molecule	3e-159	Cd33	Myeloid cell surface antigen CD33
Uba6	-1.45561	0.3646	0.0039649	36.4068	99.8715	36	101	+	rno:305268	ubiquitin-like modifier activating enzyme 6	0	Uba6	Ubiquitin-like modifier-activating enzyme 6
Plat	-1.01014	0.496497	0.0039701	438.904	884.011	434	894	-	rno:25692	plasminogen activator, tissue	0	Plat	Tissue-type plasminogen activator
Tap1	1.10765	2.15495	0.00397714	298.333	138.436	295	140	+	rno:24811	transporter 1, ATP-binding cassette, sub-family B (MDR/TAP)	1e-135	Abcb9	ATP-binding cassette sub-family B member 9
Prmt6	-4.34639	0.0491592	0.00399292	1.0113	20.7654	1	21	-	rno:295384	protein arginine methyltransferase 6	3e-56	Prmt8	Protein arginine N-methyltransferase 8
Pnpla1	-1.96676	0.255827	0.00407852	13.1469	51.419	13	52	+	rno:361812	patatin-like phospholipase domain containing 1	4e-52	Pnpla3	Patatin-like phospholipase domain-containing protein 3
Zmym2	-1.10318	0.465489	0.00407916	143.605	308.514	142	312	+	rno:305913	zinc finger, MYM-type 2	0	Zmym2	Putative uncharacterized protein
Ttc37	-1.10503	0.464894	0.00409319	141.582	304.559	140	308	+	rno:294595	tetratricopeptide repeat domain 37	0	Ttc37	ASL1/AK129128 fusion
Fbln7	2.88725	7.3986	0.00410241	29.3277	3.95531	29	4	+	rno:296145	fibulin 7	0	Fbln7	Fibulin-7
Cyp2d5	-10.716	0.000594529	0.00415466	0	16.81	0	17	-	rno:286963	cytochrome P450, family 2, subfamily d, polypeptide 5	0	Cyp2d34	Cyp2d34 protein
Rnase10	-10.716	0.000594529	0.00415466	0	16.81	0	17	+	rno:305840	ribonuclease, RNase A family, 10 (non-active)	4e-86	Rnase10	Ribonuclease, RNase A family, 10 (Non-active)
Sh3tc2	-10.716	0.000594529	0.00415466	0	16.81	0	17	+	rno:307393	SH3 domain and tetratricopeptide repeats 2	0	Sh3tc2	Putative uncharacterized protein
LOC102547830	-10.716	0.000594529	0.00415466	0	16.81	0	17	+		uncharacterized LOC102547830
Cracr2a	-10.716	0.000594529	0.00415466	0	16.81	0	17	+	rno:500324	calcium release activated channel regulator 2A	0	Cracr2a	EF-hand calcium-binding domain-containing protein 4B
Mir1249	-10.716	0.000594529	0.00415466	0	16.81	0	17	-	rno:100526607	microRNA mir-1249
LOC103691060	-10.716	0.000594529	0.00415466	0	16.81	0	17	+		zinc finger protein 416-like	9e-47	Zfp418	Zinc finger protein 418
Drc1	-1.5887	0.332471	0.00421096	26.2938	79.1061	26	80	-	rno:362712	dynein regulatory complex subunit 1
Rps27	0.994717	1.99269	0.00423256	3972.39	1993.47	3928	2016	-	rno:94266	ribosomal protein S27	5e-45	Rps27rt	ribosomal protein S27, retrogene
Ccdc88a	-1.08301	0.472043	0.00424529	163.831	347.078	162	351	+	rno:305605	coiled coil domain containing 88A	0	Ccdc88a	Girdin
Cep95	-1.03712	0.487298	0.00427735	255.859	525.067	253	531	+	rno:287766	centrosomal protein 95kDa	0	Cep95	Centrosomal protein of 95 kDa
Rps11	1.01498	2.02088	0.00429184	11478.3	5679.82	11350	5744	-	rno:81774	ribosomal protein S11	6e-90	Rps11	40S ribosomal protein S11
Pllp	1.08614	2.12306	0.00429496	331.706	156.235	328	158	+	rno:64364	plasmolipin	1e-89	Pllp	Plasmolipin
Dst	-0.997567	0.500844	0.00430481	2190.48	4373.58	2166	4423	-		dystonin	0	Dst	Dystonin
RGD1306058	1.06724	2.09542	0.00430628	381.26	181.944	377	184	+	rno:361224	similar to RIKEN cDNA 1110007C09	6e-80	1110007C09Rik	RIKEN cDNA 1110007C09, isoform CRA_a
Rbm26	-1.04455	0.484796	0.00437924	230.576	475.626	228	481	-		RNA binding motif protein 26	0	Rbm26	RNA-binding protein 26
Snap23	-1.55221	0.340988	0.00438362	28.3164	83.0614	28	84	+	rno:64630	synaptosomal-associated protein 23	7e-117	Snap23	Synaptosomal-associated protein 23
Map7	-1.1449	0.45222	0.00438571	108.209	239.296	107	242	+	rno:293016	microtubule-associated protein 7	0	Map7	Ensconsin
Arpc1b	0.989376	1.98533	0.00444615	3105.7	1564.32	3071	1582	-	rno:54227	actin related protein 2/3 complex, subunit 1B	0	Arpc1b	Actin-related protein 2/3 complex subunit 1B
Zbtb44	-1.05019	0.482903	0.00446432	214.396	443.983	212	449	+	rno:363035	zinc finger and BTB domain containing 44	0	Zbtb44	Putative uncharacterized protein
Ghdc	1.11451	2.16521	0.00446667	274.062	126.57	271	128	-	rno:303542	GH3 domain containing	2e-118	Ghdc	GH3 domain-containing protein
Celf4	-0.988232	0.504095	0.00457372	1156.93	2295.07	1144	2321	-	rno:307540	CUGBP, Elav-like family member 4	2e-139	Celf4	CUGBP Elav-like family member 4
Smg1	-1.00019	0.499933	0.00459933	464.187	928.508	459	939	-	rno:691397	SMG1 phosphatidylinositol 3-kinase-related kinase	0	Smg1	Serine/threonine-protein kinase SMG1
Pcmtd2	-1.00197	0.499317	0.00461344	439.915	881.044	435	891	+	rno:311726	protein-L-isoaspartate (D-aspartate) O-methyltransferase domain containing 2	8e-132	Pcmtd1	Protein-L-isoaspartate O-methyltransferase domain-containing protein 1
Zmynd15	-3.1333	0.113968	0.0046162	3.0339	26.6983	3	27	+	rno:287457	zinc finger, MYND-type containing 15
LOC679894	-1.49085	0.355802	0.00464604	32.3616	90.972	32	92	-	rno:679894	similar to THO complex subunit 2 (Tho2)	0	BC005561	Protein BC005561
Zfp281	-1.12254	0.459283	0.00466185	120.345	262.039	119	265	+	rno:305083	zinc finger protein 281	0	Zfp281	Putative uncharacterized protein
Scx	3.14359	8.83722	0.00474029	26.2938	2.96648	26	3	+	rno:680712	scleraxis	5e-82	Scx	Basic helix-loop-helix transcription factor scleraxis
LOC100910720	3.14359	8.83722	0.00474029	26.2938	2.96648	26	3	+		probable ATP-dependent RNA helicase DDX41-like	0	Ddx41	Putative uncharacterized protein
Mynn	-1.03591	0.487709	0.00480513	239.678	491.447	237	497	-	rno:361924	myoneurin	0	Mynn	Mszf2
Tmem144	1.45746	2.74625	0.00483696	95.0622	34.6089	94	35	-	rno:361968	transmembrane protein 144	0	Tmem144	Transmembrane protein 144
Cacnb4	-1.40987	0.376346	0.00490613	39.4407	104.816	39	106	-	rno:58942	calcium channel, voltage-dependent, beta 4 subunit	0	Cacnb4	Calcium channel, voltage-dependent, beta 4 subunit
Mastl	2.3933	5.2536	0.00495303	36.4068	6.92179	36	7	+	rno:307169	microtubule associated serine/threonine kinase-like	0	Mastl	Serine/threonine-protein kinase greatwall
LOC102547986	-1.63342	0.322323	0.00497339	23.2599	72.1843	23	73	-		40S ribosomal protein S2-like
St8sia4	-1.36593	0.387984	0.00498716	44.4972	114.704	44	116	-	rno:116696	ST8 alpha-N-acetyl-neuraminide alpha-2,8-sialyltransferase 4	9e-147	St8sia4	CMP-N-acetylneuraminate-poly-alpha-2,8-sialyltransferase
LOC683573	3.54933	11.7072	0.00508543	23.2599	1.97765	23	2	-	rno:683573	similar to response gene to complement 32
Gmpr	0.996314	1.9949	0.00508545	838.368	420.251	829	425	-	rno:117533	guanosine monophosphate reductase	0	Gmpr	GMP reductase 1
Gpatch2	-1.06483	0.478028	0.00510301	173.944	363.888	172	368	+	rno:289362	G patch domain containing 2	0	Gpatch2	G patch domain-containing protein 2
Ercc6	-0.993978	0.502091	0.00515321	465.198	926.53	460	937	+	rno:306274	excision repair cross-complementation group 6	0	Ercc6	Ercc6 protein
Glce	-1.06941	0.476513	0.00520697	165.853	348.067	164	352	-	rno:363073	glucuronic acid epimerase	0	Glce	D-glucuronyl C5-epimerase
Plxnd1	0.980757	1.9735	0.00523698	2968.16	1504.01	2935	1521	-	rno:312652	plexin D1	0	Plxnd1	Plexin-D1
LOC102551114	1.21752	2.32547	0.00526152	167.876	72.1843	166	73	+		uncharacterized LOC102551114
Sema3g	2.66223	6.33013	0.00527351	31.3503	4.94413	31	5	+	rno:290562	sema domain, immunoglobulin domain (Ig), short basic domain, secreted, (semaphorin) 3G	0	Sema3g	Semaphorin-3G
Gpr68	2.66223	6.33013	0.00527351	31.3503	4.94413	31	5	-	rno:314386	G protein-coupled receptor 68	0	Gpr68	Putative uncharacterized protein
Cdc6	1.11349	2.16369	0.00527887	258.893	119.648	256	121	+	rno:360621	cell division cycle 6	0	Cdc6	Cell division control protein 6 homolog
RGD1307752	0.992141	1.98913	0.00539081	857.582	431.128	848	436	+	rno:296315	similar to RIKEN cDNA 1110008F13	4e-71	1110008F13Rik	Uncharacterized protein C20orf24 homolog
Aff4	-0.980455	0.50682	0.00540778	1353.12	2669.83	1338	2700	+	rno:303132	AF4/FMR2 family, member 4	0	Aff4	AF4/FMR2 family member 4
Csrp3	10.661	1619.08	0.00544452	16.1808	0	16	0	-	rno:117505	cysteine and glycine-rich protein 3 (cardiac LIM protein)	3e-110	Csrp3	Cysteine and glycine-rich protein 3
LOC100911555	10.661	1619.08	0.00544452	16.1808	0	16	0	+		uncharacterized LOC100911555
Aqp5	10.661	1619.08	0.00544452	16.1808	0	16	0	+	rno:25241	aquaporin 5	3e-149	Aqp5	Aqp5 protein
Syt15	10.661	1619.08	0.00544452	16.1808	0	16	0	+	rno:306285	synaptotagmin XV	0	Syt15	Synaptotagmin-15
Apoa5	10.661	1619.08	0.00544452	16.1808	0	16	0	+	rno:140638	apolipoprotein A-V	0	Apoa5	Apolipoprotein A-V
Anxa2-ps1	10.661	1619.08	0.00544452	16.1808	0	16	0	+		annexin 2 pseudogene1
LOC103691845	10.661	1619.08	0.00544452	16.1808	0	16	0	+		uncharacterized LOC103691845
Procr	10.661	1619.08	0.00544452	16.1808	0	16	0	+	rno:362248	protein C receptor, endothelial	1e-85	Procr	Endothelial protein C receptor
Tbc1d10c	10.661	1619.08	0.00544452	16.1808	0	16	0	-	rno:361697	TBC1 domain family, member 10C	4e-111	Tbc1d10b	TBC1 domain family member 10B
Oma1	-1.53493	0.345096	0.00547693	28.3164	82.0726	28	83	+	rno:298282	OMA1 zinc metallopeptidase	7e-158	Oma1	Metalloendopeptidase OMA1, mitochondrial
Mettl1	1.22495	2.33747	0.00551314	161.808	69.2179	160	70	+	rno:679091	methyltransferase like 1	8e-154	Mettl1	tRNA (guanine-N(7)-)-methyltransferase
Nagpa	1.05175	2.07304	0.00555871	379.237	182.933	375	185	+	rno:360476	N-acetylglucosamine-1-phosphodiester alpha-N-acetylglucosaminidase	0	Nagpa	N-acetylglucosamine-1-phosphodiester alpha-N-acetylglucosaminidase
Zfp612	-1.93875	0.260842	0.00557662	13.1469	50.4301	13	51	-	rno:307839	zinc finger protein 612	0	Zfp612	Protein Zfp612
Serinc4	-2.64326	0.160067	0.00561989	5.0565	31.6424	5	32	-	rno:311358	serine incorporator 4	0	Serinc4	Serine incorporator 4
Gulp1	-2.64326	0.160067	0.00561989	5.0565	31.6424	5	32	+	rno:314543	GULP, engulfment adaptor PTB domain containing 1	1e-172	Gulp1	PTB domain-containing engulfment adapter protein 1
Zfp53	2.2789	4.85308	0.0056314	38.4294	7.91061	38	8	+	rno:308236	zinc finger protein 53	0	Zfp53	Zinc finger protein 118
Itgb3	2.2789	4.85308	0.0056314	38.4294	7.91061	38	8	+	rno:29302	integrin, beta 3	0	Itgb5	Integrin beta-5
Fst	-1.25165	0.419967	0.0056808	62.7006	149.313	62	151	-	rno:24373	follistatin	0	Fst	Follistatin
Fam46b	-2.36803	0.193709	0.00569157	7.0791	36.5866	7	37	+	rno:313019	family with sequence similarity 46, member B	0	Fam46b	Protein FAM46B
Tmem194	-2.36803	0.193709	0.00569157	7.0791	36.5866	7	37	+	rno:679504	transmembrane protein 194A	0	Tmem194	Putative uncharacterized protein
Flvcr2	-2.36803	0.193709	0.00569157	7.0791	36.5866	7	37	+	rno:314323	feline leukemia virus subgroup C cellular receptor family, member 2	0	Mfsd7c	Putative uncharacterized protein
LOC103693257	-2.36803	0.193709	0.00569157	7.0791	36.5866	7	37	+		DNA repair endonuclease XPF-like	0	Ercc4	DNA repair endonuclease XPF
Apbb1ip	1.09896	2.142	0.00588242	269.006	125.581	266	127	-	rno:307171	amyloid beta (A4) precursor protein-binding, family B, member 1 interacting protein	0	Apbb1ip	Amyloid beta (A4) protein-binding, family B, member 1 interacting protein, isoform CRA_a
Cxadr	-0.974929	0.508765	0.00593011	889.944	1749.23	880	1769	+	rno:89843	coxsackie virus and adenovirus receptor	0	Cxadr	Coxsackievirus and adenovirus receptor homolog
Rhobtb3	-1.35344	0.391358	0.0059313	44.4972	113.715	44	115	-	rno:309922	Rho-related BTB domain containing 3	3e-24	Rhobtb1	Rhobtb1 protein
Nrip2	-2.10399	0.232614	0.00594034	10.113	43.5084	10	44	+	rno:689619	nuclear receptor interacting protein 2	2e-107	Nrip2	Nuclear receptor-interacting protein 2
Sepsecs	-1.20096	0.434986	0.00615003	74.8362	172.056	74	174	+	rno:679383	Sep (O-phosphoserine) tRNA:Sec (selenocysteine) tRNA synthase	0	Sepsecs	O-phosphoseryl-tRNA(Sec) selenium transferase
Tmem109	0.974088	1.9644	0.00622747	1225.7	623.949	1212	631	-	rno:361732	transmembrane protein 109	2e-109	Tmem109	Transmembrane protein 109
Vrk2	1.35415	2.55646	0.00626601	111.243	43.5084	110	44	-	rno:360991	vaccinia related kinase 2	0	Vrk2	Serine/threonine-protein kinase VRK2
Tagap	2.48986	5.61722	0.00637441	33.3729	5.93296	33	6	-		T-cell activation RhoGTPase activating protein	0	Tagap	T-cell activation Rho GTPase-activating protein
Lin54	-1.07373	0.47509	0.00643485	145.627	306.536	144	310	+	rno:305171	lin-54 DREAM MuvB core complex component	0	Lin54	Lin54 protein
Tmem67	-1.23049	0.426174	0.00643539	65.7345	154.257	65	156	-	rno:313067	transmembrane protein 67	0	Tmem67	Meckelin
RGD1310166	2.83664	7.14356	0.00648322	28.3164	3.95531	28	4	+	rno:303395	similar to Chromodomain-helicase-DNA-binding protein 1 (CHD-1)	6e-103	1700125H20Rik	Uncharacterized protein C17orf64 homolog
Plin3	1.17298	2.25478	0.00654127	185.068	82.0726	183	83	+	rno:316130	perilipin 3	0	Plin3	Putative uncharacterized protein
LOC100909406	-2.03073	0.244731	0.00654768	11.1243	45.486	11	46	-		uncharacterized LOC100909406
LOC102556346	-2.8225	0.141365	0.00656573	4.0452	28.676	4	29	+		angiotensin-converting enzyme-like	2e-56	Ace	Angiotensin-converting enzyme
Samsn1	1.68727	3.22047	0.00661854	63.7119	19.7765	63	20	-	rno:170637	SAM domain, SH3 domain and nuclear localization signals, 1	7e-156	Samsn1	SAM domain-containing protein SAMSN-1
Nt5e	1.61696	3.06727	0.00664338	69.7797	22.743	69	23	+	rno:58813	5' nucleotidase, ecto	0	Nt5e	5' nucleotidase, ecto, isoform CRA_a
Zfp868	-1.06329	0.47854	0.00667895	154.729	323.346	153	327	+	rno:494340	zinc finger protein 868	0	Zfp868	Mszf62
Tmbim1	1.04012	2.05639	0.00669958	378.226	183.922	374	186	-	rno:316516	transmembrane BAX inhibitor motif containing 1	2e-149	Tmbim1	Protein lifeguard 3
Ttyh1	-0.980855	0.506679	0.00674886	3007.61	5935.93	2974	6003	-	rno:292597	tweety family member 1	0	Ttyh1	Protein tweety homolog 1
Nfat5	-1.08216	0.47232	0.00675392	134.503	284.782	133	288	-	rno:307820	nuclear factor of activated T-cells 5, tonicity-responsive	0	Nfat5	Nuclear factor of-activated T-cells 5
Rps27a	0.967918	1.95602	0.00680668	3096.6	1583.11	3062	1601	-	rno:81777	ribosomal protein S27a	1e-88	Rps27a	Ubiquitin-40S ribosomal protein S27a
Dpy19l3	-0.976264	0.508294	0.00682968	501.605	986.849	496	998	-	rno:308519	dpy-19-like 3 (C. elegans)	0	Dpy19l3	Probable C-mannosyltransferase DPY19L3
LOC102554253	1.01956	2.02731	0.00683123	453.062	223.475	448	226	-		uncharacterized LOC102554253
Bmp6	-1.13742	0.454571	0.00683128	97.0848	213.587	96	216	-	rno:25644	bone morphogenetic protein 6	0	Bmp6	Bone morphogenetic protein 6
LOC103691668	-4.27604	0.0516159	0.00684256	1.0113	19.7765	1	20	+		uncharacterized LOC103691668
Rell1	-1.18715	0.439169	0.00687845	76.8588	175.022	76	177	+	rno:289635	RELT-like 1	6e-134	Rell1	RELT-like protein 1
Mtr	-1.29499	0.40754	0.00687878	51.5763	126.57	51	128	-	rno:81522	5-methyltetrahydrofolate-homocysteine methyltransferase	0	Mtr	Methionine synthase
Ccser2	-0.9814	0.506488	0.00694087	419.689	828.637	415	838	-	rno:306306	coiled-coil serine-rich protein 2	0	Ccser2	Serine-rich coiled-coil domain-containing protein 2
Kat6b	-0.966627	0.511701	0.00705454	774.656	1513.89	766	1531	-		K(lysine) acetyltransferase 6B	0	Kat6b	Myst4 protein
Aif1	1.02543	2.03557	0.00705637	418.678	205.676	414	208	-	rno:29427	allograft inflammatory factor 1	1e-48	Aif1l	Allograft inflammatory factor 1-like
LOC103694256	-1.3647	0.388315	0.00709476	41.4633	106.793	41	108	-		zinc finger protein 407-like	0	Zfp407	Protein Zfp407
LOC100911238	1.13091	2.18996	0.00710294	214.396	97.8938	212	99	+		proteasome maturation protein-like	7e-75	Pomp	Proteasome maturation protein
Kansl1	-0.964	0.512634	0.00726292	1022.42	1994.46	1011	2017	-		KAT8 regulatory NSL complex subunit 1
Gls	-1.01325	0.495427	0.00729434	235.633	475.626	233	481	+	rno:24398	glutaminase	0	Gls	Glutaminase kidney isoform, mitochondrial
LOC688390	-3.07887	0.11835	0.00736195	3.0339	25.7095	3	26	+	rno:688390	hypothetical protein LOC688390
Esyt3	-3.07887	0.11835	0.00736195	3.0339	25.7095	3	26	-	rno:363120	extended synaptotagmin-like protein 3	0	Esyt3	Extended synaptotagmin-3
LOC100910258	-3.07887	0.11835	0.00736195	3.0339	25.7095	3	26	+		zinc finger protein 599-like	1e-101	Zfp647	KRAB zinc-finger protein
Igsf6	2.35267	5.1077	0.00737115	35.3955	6.92179	35	7	-	rno:171064	immunoglobulin superfamily, member 6	8e-111	Igsf6	Immunoglobulin superfamily member 6
Golga1	-1.04975	0.483053	0.00740574	163.831	339.167	162	343	-	rno:311919	golgin A1
LOC360998	-1.69641	0.308553	0.00742498	19.2147	62.2961	19	63	+		hypothetical LOC360998	1e-42	Gm9602	Protein Gm9602
ND4L	-1.69641	0.308553	0.00742498	19.2147	62.2961	19	63	+	rno:26200	NADH dehydrogenase subunit 4L	2e-33	ND4L	NADH-ubiquinone oxidoreductase chain 4
Ccp110	-1.03989	0.486365	0.00749338	176.977	363.888	175	368	+	rno:361634	centriolar coiled coil protein 110kDa	0	Ccp110	Putative uncharacterized protein
Hist1h1b	-10.6286	0.000631663	0.00753842	0	15.8212	0	16	+	rno:680522	histone cluster 1, H1b	4e-41	Hist1h1b	Histone H1.5
Tnni3	-10.6286	0.000631663	0.00753842	0	15.8212	0	16	+	rno:29248	troponin I type 3 (cardiac)	4e-119	Tnni3	Troponin I, cardiac muscle
Lca5l	-10.6286	0.000631663	0.00753842	0	15.8212	0	16	-	rno:498065	Leber congenital amaurosis 5-like	3e-44	Lca5	Lebercilin
Megf6	-10.6286	0.000631663	0.00753842	0	15.8212	0	16	+	rno:65049	multiple EGF-like-domains 6	0	Megf6	Multiple epidermal growth factor-like domains protein 6
LOC103693105	-10.6286	0.000631663	0.00753842	0	15.8212	0	16	+		uncharacterized LOC103693105
Psmb11	-10.6286	0.000631663	0.00753842	0	15.8212	0	16	+	rno:290206	proteasome (prosome, macropain) subunit, beta type, 11	1e-150	Psmb11	Proteasome subunit beta type-11
LOC100363196	-10.6286	0.000631663	0.00753842	0	15.8212	0	16	-
LOC102554987	-10.6286	0.000631663	0.00753842	0	15.8212	0	16	+		uncharacterized LOC102554987
Clock	-1.17149	0.443962	0.00760565	79.8927	179.966	79	182	+	rno:60447	clock circadian regulator	0	Clock	Circadian locomoter output cycles protein kaput
Dct	-1.91019	0.266058	0.00761302	13.1469	49.4413	13	50	-	rno:290484	dopachrome tautomerase	0	Dct	L-dopachrome tautomerase
Csf1r	0.969349	1.95796	0.00763403	5024.14	2566	4968	2595	+	rno:307403	colony stimulating factor 1 receptor	0	Csf1r	Macrophage colony-stimulating factor 1 receptor
Enpp3	3.08703	8.49745	0.00768956	25.2825	2.96648	25	3	+	rno:54410	ectonucleotide pyrophosphatase/phosphodiesterase 3	0	Enpp3	Enpp3 protein
Ppm1n	3.08703	8.49745	0.00768956	25.2825	2.96648	25	3	-	rno:292690	protein phosphatase, Mg2+/Mn2+ dependent, 1N	0	Ppm1n	Probable protein phosphatase 1N
Rassf5	1.35414	2.55644	0.00779687	106.186	41.5307	105	42	-	rno:54355	Ras association (RalGDS/AF-6) domain family member 5	0	Rassf5	Ras association domain-containing protein 5
Slc17a9	1.91612	3.77407	0.00788546	48.5424	12.8547	48	13	+	rno:362287	solute carrier family 17 (vesicular nucleotide transporter), member 9	1e-40	Slc17a6	Vesicular glutamate transporter 2
Acsl5	1.01845	2.02574	0.00794046	416.656	205.676	412	208	+	rno:94340	acyl-CoA synthetase long-chain family member 5	0	Acsl5	Acyl-CoA synthetase long-chain family member 5, isoform CRA_b
Map3k2	-1.61623	0.326186	0.00796623	22.2486	68.229	22	69	+	rno:171492	mitogen activated protein kinase kinase kinase 2	0	Map3k2	Mitogen activated protein kinase kinase kinase 2
LOC500881	-1.2782	0.412308	0.00800272	52.5876	127.559	52	129	-		similar to nucleolar protein 1	0	Nop2	Probable 28S rRNA (cytosine-C(5))-methyltransferase
Cacna2d1	-0.992645	0.502556	0.0080251	288.22	573.519	285	580	-	rno:25399	calcium channel, voltage-dependent, alpha2/delta subunit 1	0	Cacna2d1	Voltage-dependent calcium channel subunit alpha-2/delta-1
Prr29	2.61494	6.126	0.00813968	30.339	4.94413	30	5	+	rno:287761	proline rich 29	5e-33	2310007L24Rik	Protein 2310007L24Rik
Prr14l	-0.985993	0.504878	0.00819777	314.514	622.961	311	630	+	rno:305466	proline rich 14-like	0	Prr14l	Protein Prr14l
Serhl2	1.52511	2.87808	0.00821598	76.8588	26.6983	76	27	+	rno:500911	serine hydrolase-like 2	7e-140	Serhl	Serine hydrolase-like protein
Bhlhe22	-0.957621	0.514905	0.00822206	882.865	1714.63	873	1734	+	rno:365748	basic helix-loop-helix family, member e22	1e-142	Bhlhe22	Class E basic helix-loop-helix protein 22
Tfdp2	-1.00274	0.499052	0.00822945	245.746	492.436	243	498	+	rno:300947	transcription factor Dp-2 (E2F dimerization partner 2)	0	Tfdp2	Transcription factor Dp-2
Kcnn3	-1.55217	0.340998	0.00831726	25.2825	74.162	25	75	+	rno:54263	potassium intermediate/small conductance calcium-activated channel, subfamily N, member 3	0	Kcnn3	Small conductance calcium-activated potassium channel protein 3
Zscan29	-1.09904	0.466827	0.00838757	111.243	238.307	110	241	-		zinc finger and SCAN domain containing 29	0	Zscan29	Protein Zscan29
Slitrk5	-0.975295	0.508636	0.00840182	376.204	739.642	372	748	+	rno:306152	SLIT and NTRK-like family, member 5	0	Slitrk5	MKIAA0918 protein
Rpp40	1.1999	2.29724	0.00841588	156.751	68.229	155	69	+	rno:291071	ribonuclease P/MRP 40 subunit	0	Rpp40	Ribonuclease P protein subunit p40
Pou3f2	-0.957077	0.515099	0.0084374	767.577	1490.16	759	1507	-	rno:29588	POU class 3 homeobox 2	0	Pou3f2	POU domain, class 3, transcription factor 2
Wdr38	-1.49974	0.353616	0.00852306	28.3164	80.0949	28	81	+	rno:366035	WD repeat domain 38	1e-155	Wdr38	WD repeat-containing protein 38
Nod2	-2.59747	0.165228	0.00853778	5.0565	30.6536	5	31	-	rno:291912	nucleotide-binding oligomerization domain containing 2	0	Nod2	CARD15 short isoform
Zfp192	-1.48432	0.357417	0.00856602	29.3277	82.0726	29	83	+	rno:306974	zinc finger protein 192	0	Zkscan8	Zfp192 protein
Lmbrd2	-1.46978	0.361039	0.00859816	30.339	84.0502	30	85	+	rno:499539	LMBR1 domain containing 2	0	Lmbrd2	LMBR1 domain-containing protein 2
Pbrm1	-0.958924	0.51444	0.00870705	592.622	1151.98	586	1165	+	rno:306254	polybromo 1	0	Pbrm1	Protein polybromo-1
Rasa4	1.0146	2.02034	0.00874332	407.554	201.721	403	204	-	rno:288589	RAS p21 protein activator 4	0	Rasal1	RasGAP-activating-like protein 1
LOC688682	-1.13561	0.455141	0.00885032	90.0057	197.765	89	200	-	rno:688682	similar to small nuclear ribonucleoparticle-associated protein
Vsig10l	1.07098	2.10087	0.00885507	267.994	127.559	265	129	-	rno:308556	V-set and immunoglobulin domain containing 10 like	3e-18	Ceacam1	Carcinoembryonic antigen-related cell adhesion molecule 1
LOC100363520	-1.99903	0.250169	0.00910784	11.1243	44.4972	11	45	+	rno:100363520	mCG16729-like	2e-76	Setdb1	Histone-lysine N-methyltransferase SETDB1
LOC103694111	-1.73751	0.299887	0.00915822	17.1921	57.3519	17	58	-		uncharacterized LOC103694111
Asphd1	-1.00224	0.499226	0.00918345	228.554	457.827	226	463	-	rno:293498	aspartate beta-hydroxylase domain containing 1	2e-79	Asphd2	Aspartate beta-hydroxylase domain-containing protein 2
Ppp6r3	-0.951337	0.517153	0.00926141	1129.62	2184.32	1117	2209	-		protein phosphatase 6, regulatory subunit 3	0	Ppp6r3	SAPS domain family, member 3, isoform CRA_c
LOC102551716	-1.09414	0.468414	0.00927116	110.232	235.341	109	238	+		sodium/potassium-transporting ATPase subunit beta-1-interacting protein 2-like
Irf5	0.996019	1.99449	0.00928767	475.311	238.307	470	241	+	rno:296953	interferon regulatory factor 5	0	Irf5	Interferon regulatory factor 5 bone marrow variant
Cdk8	-1.06268	0.478742	0.00938177	133.492	278.849	132	282	-	rno:498140	cyclin-dependent kinase 8	0	Cdk8	Cyclin-dependent kinase 8
Pde1c	-1.15119	0.450253	0.00945758	81.9153	181.944	81	184	-	rno:81742	phosphodiesterase 1C	0	Pde1c	Calcium/calmodulin-dependent 3',5'-cyclic nucleotide phosphodiesterase 1C
Mlh3	-1.19599	0.436487	0.00946675	67.7571	155.246	67	157	-	rno:314320	mutL homolog 3	0	Mlh3	Putative uncharacterized protein
Sgsh	1.2879	2.44172	0.00954753	118.322	48.4525	117	49	-	rno:688293	N-sulfoglucosamine sulfohydrolase	5e-161	Sgsh	cDNA fis, clone TRACH3001759, highly similar to Mus musculus N-sulfoglucosamine sulfohydrolase (sulfamidase)
LOC685894	2.44548	5.44705	0.00963814	32.3616	5.93296	32	6	-		similar to heterogeneous nuclear ribonucleoprotein A3
Faxc	-0.999396	0.50021	0.00975402	226.531	452.883	224	458	+	rno:366333	failed axon connections homolog (Drosophila)	1e-171	Faxc	Failed axon connections homolog
Mtf2	-1.04298	0.485323	0.00981442	150.684	310.492	149	314	-	rno:360905	metal response element binding transcription factor 2	0	Mtf2	Metal-response element-binding transcription factor 2
Tcerg1l	-1.13011	0.456881	0.00994712	88.9944	194.799	88	197	-	rno:361669	transcription elongation regulator 1-like	0	Tcerg1l	Transcription elongation regulator 1-like protein
Rgs18	10.5679	1517.95	0.0100971	15.1695	0	15	0	-	rno:289076	regulator of G-protein signaling 18	3e-129	Rgs18	Regulator of G-protein signaling 18
Gda	10.5679	1517.95	0.0100971	15.1695	0	15	0	-	rno:83585	guanine deaminase	0	Gda	Guanine deaminase
LOC103692457	10.5679	1517.95	0.0100971	15.1695	0	15	0	+		uncharacterized LOC103692457
RGD1561730	10.5679	1517.95	0.0100971	15.1695	0	15	0	-	rno:498169	similar to cell surface receptor FDFACT	3e-80	Pilrb2	Paired immunoglobulin-like type 2 receptor beta-2
S1pr4	10.5679	1517.95	0.0100971	15.1695	0	15	0	+	rno:314649	sphingosine-1-phosphate receptor 4	0	S1pr4	Sphingosine 1-phosphate receptor 4
LOC102556356	10.5679	1517.95	0.0100971	15.1695	0	15	0	-		uncharacterized LOC102556356
LOC103693804	10.5679	1517.95	0.0100971	15.1695	0	15	0	-		uncharacterized LOC103693804
LOC102546345	10.5679	1517.95	0.0100971	15.1695	0	15	0	-		uncharacterized LOC102546345
Hrasls	10.5679	1517.95	0.0100971	15.1695	0	15	0	-	rno:288025	HRAS-like suppressor	5e-93	Hrasls	HRAS-like suppressor, isoform CRA_a
Itgb7	10.5679	1517.95	0.0100971	15.1695	0	15	0	-	rno:25713	integrin, beta 7	0	Itgb7	Integrin beta-7
Rhog	0.944357	1.92433	0.0101826	1590.77	826.659	1573	836	-	rno:308875	ras homolog family member G	6e-112	Rhog	Ras homolog gene family member G
Tfcp2l1	-2.77189	0.146412	0.0101888	4.0452	27.6871	4	28	+	rno:304741	transcription factor CP2-like 1	0	Tfcp2l1	Transcription factor CP2-like protein 1
Hpdl	1.25854	2.39253	0.0102551	125.401	52.4078	124	53	-	rno:313521	4-hydroxyphenylpyruvate dioxygenase-like	0	Hpdl	4-hydroxyphenylpyruvate dioxygenase-like protein
Hmgcs2	-0.950662	0.517395	0.0102878	564.305	1090.68	558	1103	+	rno:24450	3-hydroxy-3-methylglutaryl-CoA synthase 2 (mitochondrial)	0	Hmgcs2	cDNA fis, clone TRACH2006528,highly similar to HYDROXYMETHYLGLUTARYL-COA SYNTHASE, MITOCHONDRIAL (EC 4.1.3.5)
Themis2	1.17527	2.25835	0.0103153	160.797	71.1955	159	72	-	rno:500561	thymocyte selection associated family member 2	0	Themis2	Protein THEMIS2
Usp37	-1.00687	0.497623	0.0103194	201.249	404.43	199	409	-	rno:100361658	ubiquitin specific peptidase 37	0	Usp37	Ubiquitin carboxyl-terminal hydrolase 37
Gpr75	-1.88105	0.271486	0.0103736	13.1469	48.4525	13	49	+	rno:498434	G protein-coupled receptor 75	0	Gpr75	G protein-coupled receptor 75
Macf1	-0.957336	0.515007	0.0103957	2788.15	5413.82	2757	5475	-		microtubule-actin crosslinking factor 1	0	Macf1	Microtubule-actin cross-linking factor 1
LOC100911902	-1.55215	0.341002	0.0104165	24.2712	71.1955	24	72	+		cellular retinoic acid-binding protein 2-like	2e-75	Crabp2	Cellular retinoic acid-binding protein 2
Iqca1	-2.42508	0.1862	0.0104363	6.0678	32.6313	6	33	-	rno:316616	IQ motif containing with AAA domain 1	0	Iqca	IQ and AAA domain-containing protein 1
Cntn6	-2.42508	0.1862	0.0104363	6.0678	32.6313	6	33	+	rno:27256	contactin 6	0	Cntn6	Contactin-6
LOC102547413	-1.17803	0.441954	0.0104728	70.791	160.19	70	162	+		zinc finger protein 420-like	0	Zfp790	Protein Zfp790
Fcna	-1.17803	0.441954	0.0104728	70.791	160.19	70	162	-	rno:83517	ficolin A	2e-165	Fcna	Ficolin-1
Folr2	0.991571	1.98835	0.0104888	458.119	230.397	453	233	-	rno:293154	folate receptor 2 (fetal)	1e-98	Folr1	Folr1 protein
Tbc1d7	1.10273	2.14761	0.0106079	212.373	98.8826	210	100	-	rno:361227	TBC1 domain family, member 7	9e-169	Tbc1d7	Putative uncharacterized protein
Klhl3	-1.48182	0.358036	0.0106133	28.3164	79.1061	28	80	+	rno:498697	kelch-like family member 3	0	Klhl3	Kelch-like protein 3
Grin2b	-1.0617	0.479067	0.0106228	127.424	265.994	126	269	-	rno:24410	glutamate receptor, ionotropic, N-methyl D-aspartate 2B	0	Grin2b	Glutamate receptor ionotropic, NMDA 2B
Lrrc16a	-0.948916	0.518022	0.0107108	551.158	1063.98	545	1076	+	rno:306941	leucine rich repeat containing 16A	0	Lrrc16a	Leucine-rich repeat-containing protein 16A
Siae	1.31426	2.48675	0.0107198	108.209	43.5084	107	44	+	rno:363045	sialic acid acetylesterase	0	Siae	Sialic acid acetylesterase
Myo7a	1.0539	2.07613	0.0107754	273.051	131.514	270	133	-	rno:266714	myosin VIIA	0	Myo7a	Unconventional myosin-VIIa
Cspp1	-1.05058	0.482774	0.010778	136.525	282.804	135	286	-	rno:362472	centrosome and spindle pole associated protein 1	0	Cspp1	Centrosome and spindle pole-associated protein 1
RGD1560175	-1.04028	0.486232	0.0108461	146.638	301.592	145	305	-	rno:303946	similar to hypothetical protein KIAA2018	0	Gm608	Gene model 608, (NCBI)
LOC100364016	0.988764	1.98448	0.0108614	461.153	232.374	456	235	-		cyclin B2-like	0	Ccnb2	G2/mitotic-specific cyclin-B2
Nop10	0.940501	1.9192	0.0108637	1983.16	1033.32	1961	1045	+	rno:691534	NOP10 ribonucleoprotein	4e-33	Nop10	H/ACA ribonucleoprotein complex subunit 3
Gabra4	-1.83192	0.280891	0.0108962	14.1582	50.4301	14	51	+	rno:140675	gamma-aminobutyric acid (GABA) A receptor, alpha 4	0	Gabra4	GABA-A receptor alpha-4 subunit
Csde1	-1.25566	0.418801	0.0109018	52.5876	125.581	52	127	+	rno:117180	cold shock domain containing E1, RNA binding	0	Csde1	Csde1 protein
Klhl9	-0.946882	0.518752	0.0109771	568.35	1095.62	562	1108	+	rno:313348	kelch-like family member 9	0	Klhl9	Kelch-like protein 9
Ak7	1.27104	2.41335	0.0110091	119.333	49.4413	118	50	+	rno:314416	adenylate kinase 7	0	Ak7	Adenylate kinase 7
Sec61g	0.957798	1.94234	0.0110978	724.091	372.788	716	377	-	rno:689134	SEC61, gamma subunit	4e-34	Gm10177	predicted gene 10177
Rnft1	-1.1589	0.447854	0.011388	74.8362	167.112	74	169	+		ring finger protein, transmembrane 1	0	Rnft1	RING finger and transmembrane domain-containing protein 1
LOC100365564	1.72572	3.30745	0.0114254	55.6215	16.81	55	17	+		hypothetical LOC100365564
Llgl2	1.69483	3.23738	0.0114306	57.6441	17.7989	57	18	+	rno:360661	lethal giant larvae homolog 2 (Drosophila)	0	Llgl2	Lethal(2) giant larvae protein homolog 2
Myd88	0.971891	1.96141	0.0115666	543.068	276.871	537	280	-	rno:301059	myeloid differentiation primary response 88	4e-158	Myd88	Myeloid differentiation primary response protein MyD88
Cyb5r2	-3.02231	0.123082	0.0117197	3.0339	24.7207	3	25	-	rno:365345	cytochrome b5 reductase 2	3e-163	Cyb5r2	NADH-cytochrome b5 reductase 2
LOC102555382	-4.20208	0.0543311	0.0117213	1.0113	18.7877	1	19	-		uncharacterized LOC102555382
Tnfrsf10b	-4.20208	0.0543311	0.0117213	1.0113	18.7877	1	19	+	rno:364420	tumor necrosis factor receptor superfamily, member 10b	5e-53	Tnfrsf10b	Tumor necrosis factor receptor superfamily member 10B
Chst5	1.07714	2.10985	0.0117523	231.588	109.76	229	111	-	rno:307859	carbohydrate (N-acetylglucosamine 6-O) sulfotransferase 5	0	Chst5	Carbohydrate sulfotransferase 5
Clcn3	-0.946459	0.518905	0.0118137	487.447	939.385	482	950	+	rno:84360	chloride channel, voltage-sensitive 3	0	Clcn3	Chloride channel protein
Slc35b3	-1.08949	0.469926	0.0118972	103.153	219.519	102	222	+	rno:306866	solute carrier family 35 (adenosine 3'-phospho 5'-phosphosulfate transporter), member B3	0	Slc35b3	Adenosine 3'-phospho 5'-phosphosulfate transporter 2
RGD1309903	-1.17182	0.44386	0.0120219	69.7797	157.223	69	159	-	rno:292947	similar to mKIAA1244 protein	0	D10Bwg1379e	Brefeldin A-inhibited guanine nucleotide-exchange protein 3
Kcnab1	2.20092	4.59772	0.0120485	36.4068	7.91061	36	8	+	rno:29737	potassium voltage-gated channel, shaker-related subfamily, beta member 1	0	Kcnab1	Voltage-gated potassium channel subunit beta-1
Slc12a5	-1.01321	0.495443	0.012065	172.932	349.056	171	353	+	rno:171373	solute carrier family 12 (potassium-chloride transporter), member 5	0	Slc12a5	KCC2a-S25 variant 1
Iqcb1	-1.09183	0.469166	0.0121277	101.13	215.564	100	218	-	rno:303915	IQ motif containing B1	0	Iqcb1	IQ calmodulin-binding motif-containing protein 1
Herc1	-0.936961	0.522332	0.0123073	1300.53	2489.87	1286	2518	+	rno:315771	HECT and RLD domain containing E3 ubiquitin protein ligase family member 1	0	Herc1	Protein Herc1
Nog	-1.06215	0.478917	0.0123484	119.333	249.184	118	252	-	rno:25495	noggin
Rad50	-1.09426	0.468377	0.0123688	99.1074	211.609	98	214	-	rno:64012	RAD50 homolog (S. cerevisiae)	0	Rad50	DNA repair protein RAD50
LOC102553451	2.56605	5.92186	0.0125322	29.3277	4.94413	29	5	+		uncharacterized LOC102553451
Dph1	0.985739	1.98033	0.0125359	430.814	217.542	426	220	-	rno:287523	diphthamide biosynthesis 1	0	Dph1	Diphthamide biosynthesis protein 1
Eno3	-1.36727	0.387625	0.0126341	36.4068	93.9385	36	95	+	rno:25438	enolase 3, beta, muscle	0	Eno1b	MCG17183
Ogfod3	1.00758	2.01053	0.0126341	349.91	174.033	346	176	-	rno:303749	2-oxoglutarate and iron-dependent oxygenase domain containing 3	7e-172	Ogfod3	2-oxoglutarate and iron-dependent oxygenase domain-containing protein 3
Cyp2d4	-1.62245	0.324784	0.0127749	20.226	62.2961	20	63	-	rno:171522	cytochrome P450, family 2, subfamily d, polypeptide 4	0	Cyp2d22	Cytochrome P450, family 2, subfamily d, polypeptide 22
Etv5	0.932663	1.9088	0.0128434	1370.31	717.888	1355	726	+	rno:303828	ets variant 5	0	Etv5	ETS translocation variant 5
Map2	-0.937201	0.522245	0.0128574	1650.44	3160.29	1632	3196	+	rno:25595	microtubule-associated protein 2	7e-44	Map4	Microtubule-associated protein 4
Vamp5	2.10918	4.31446	0.0129565	38.4294	8.89944	38	9	-	rno:89818	vesicle-associated membrane protein 5	1e-42	Vamp5	Putative uncharacterized protein
Lgi4	-1.15269	0.449787	0.0130145	73.8249	164.145	73	166	+	rno:361549	leucine-rich repeat LGI family, member 4	0	Lgi4	Leucine-rich repeat LGI family member 4
Swt1	-1.46368	0.362567	0.013198	28.3164	78.1173	28	79	-	rno:289088	Swt1 RNA endoribonuclease homolog (S. cerevisiae)	0	Swt1	Transcriptional protein SWT1
Kdelr3	1.26303	2.39999	0.0133142	116.299	48.4525	115	49	+	rno:315131	KDEL (Lys-Asp-Glu-Leu) endoplasmic reticulum protein retention receptor 3	2e-120	Kdelr3	ER lumen protein-retaining receptor 3
Fam171b	-0.933298	0.52366	0.0134371	646.221	1234.06	639	1248	+	rno:499821	family with sequence similarity 171, member B	0	Fam171b	Protein FAM171B
RGD1562037	-1.16011	0.447478	0.0134901	70.791	158.212	70	160	-	rno:498764	similar to OTTHUMP00000046255	0	9430020K01Rik	Uncharacterized protein
LOC103690963	-10.5355	0.000673746	0.0136962	0	14.8324	0	15	-		nesprin-1-like	6e-21	Syne3	Nesprin-3
Rsl1	-10.5355	0.000673746	0.0136962	0	14.8324	0	15	+	rno:685925	regulator of sex limited protein 1	2e-162	Zfp87	Protein Zfp87
Pde11a	-10.5355	0.000673746	0.0136962	0	14.8324	0	15	-	rno:140928	phosphodiesterase 11A	0	Pde11a	Dual 3',5'-cyclic-AMP and -GMP phosphodiesterase 11A
Msrb3	-10.5355	0.000673746	0.0136962	0	14.8324	0	15	-	rno:680036	methionine sulfoxide reductase B3	6e-112	Msrb3	Methionine-R-sulfoxide reductase B3, mitochondrial
LOC365803	-10.5355	0.000673746	0.0136962	0	14.8324	0	15	+		hypothetical LOC365803
LOC103692954	-10.5355	0.000673746	0.0136962	0	14.8324	0	15	+		uncharacterized LOC103692954
Faah	-10.5355	0.000673746	0.0136962	0	14.8324	0	15	-	rno:29347	fatty acid amide hydrolase	0	Faah	Fatty-acid amide hydrolase 1
Vip	-10.5355	0.000673746	0.0136962	0	14.8324	0	15	+	rno:117064	vasoactive intestinal peptide	5e-89	Vip	VIP peptides
Sytl3	-10.5355	0.000673746	0.0136962	0	14.8324	0	15	+	rno:499017	synaptotagmin-like 3	0	Sytl3	Sytl3 protein
Dcp2	-10.5355	0.000673746	0.0136962	0	14.8324	0	15	+	rno:291604	decapping mRNA 2	0	Dcp2	Putative uncharacterized protein
LOC100912353	-10.5355	0.000673746	0.0136962	0	14.8324	0	15	+		uncharacterized LOC100912353
LOC102556249	-10.5355	0.000673746	0.0136962	0	14.8324	0	15	-		uncharacterized LOC102556249
LOC100909507	-10.5355	0.000673746	0.0136962	0	14.8324	0	15	+		transcription factor AP-2-delta-like
LOC103693182	-10.5355	0.000673746	0.0136962	0	14.8324	0	15	+		uncharacterized LOC103693182
LOC103693426	-10.5355	0.000673746	0.0136962	0	14.8324	0	15	+		uncharacterized LOC103693426
Grem1	-10.5355	0.000673746	0.0136962	0	14.8324	0	15	-	rno:50566	gremlin 1	6e-107	Grem1	Gremlin-1
Zfp697	-10.5355	0.000673746	0.0136962	0	14.8324	0	15	+	rno:295310	zinc finger protein 697	0	Zfp697	Zinc finger protein 697, isoform CRA_a
LOC102549146	-10.5355	0.000673746	0.0136962	0	14.8324	0	15	-		uncharacterized LOC102549146
Zbtb7b	0.973624	1.96377	0.0137115	462.164	235.341	457	238	-	rno:295248	zinc finger and BTB domain containing 7B	0	Zbtb7b	Zinc finger and BTB domain-containing protein 7B
Fam213a	0.937608	1.91535	0.0138861	863.65	450.905	854	456	+	rno:290529	family with sequence similarity 213, member A	3e-62	Tmem254b	transmembrane protein 254b
Rpl36a-ps2	0.929528	1.90465	0.0140089	1190.3	624.938	1177	632	+		ribosomal protein L36a, pseudogene 2
Gna15	0.98567	1.98023	0.0140469	399.463	201.721	395	204	+	rno:89788	guanine nucleotide binding protein, alpha 15	0	Gna15	Guanine nucleotide-binding protein subunit alpha-15
Csmd1	-0.973727	0.509189	0.0141064	235.633	462.771	233	468	+	rno:364634	CUB and Sushi multiple domains 1	0	Csmd1	MKIAA1890 protein
Cep120	-0.931225	0.524413	0.0141552	609.814	1162.86	603	1176	-	rno:307302	centrosomal protein 120	0	Cep120	Centrosomal protein of 120 kDa
Rpgrip1l	-1.01363	0.495299	0.0145741	155.74	314.447	154	318	+	rno:307724	Rpgrip1-like	0	Rpgrip1l	Protein fantom
Slmap	-0.97767	0.507799	0.0149589	215.407	424.207	213	429	-	rno:290533	sarcolemma associated protein	0	Slmap	Sarcolemmal membrane-associated protein
Osbpl6	-0.954932	0.515866	0.0150708	290.243	562.642	287	569	+	rno:311129	oxysterol binding protein-like 6	0	Osbpl6	Oxysterol-binding protein
LOC103691908	-1.34285	0.39424	0.0151083	37.4181	94.9273	37	96	+		uncharacterized LOC103691908
LOC102553386	0.939043	1.91726	0.0151325	726.113	378.721	718	383	+		SUMO-conjugating enzyme UBC9-like
Klhdc8a	1.2136	2.31916	0.0151479	128.435	55.3743	127	56	+	rno:305096	kelch domain containing 8A	0	Klhdc8a	Putative uncharacterized protein
Fam213b	0.992193	1.98921	0.0152165	358	179.966	354	182	-	rno:362676	family with sequence similarity 213, member B	7e-110	Fam213b	Prostamide/prostaglandin F synthase
Prkch	1.04423	2.06227	0.0155788	246.757	119.648	244	121	+	rno:81749	protein kinase C, eta	0	Prkch	Protein kinase C eta type
LOC100359498	1.29246	2.44945	0.0157	104.164	42.5195	103	43	-	rno:100359498	ribosomal protein L35a-like	6e-61	Rpl35a	60S ribosomal protein L35a
Polr2d	0.936316	1.91364	0.0157036	734.204	383.665	726	388	+	rno:364834	polymerase (RNA) II (DNA directed) polypeptide D	7e-55	Polr2d	DNA-directed RNA polymerase II subunit RPB4
Mss51	-2.71944	0.151833	0.0157683	4.0452	26.6983	4	27	+	rno:289904	MSS51 mitochondrial translational activator	0	Mss51	Putative protein MSS51 homolog, mitochondrial
Clmn	-2.71944	0.151833	0.0157683	4.0452	26.6983	4	27	-	rno:299285	calmin	1e-59	Syne2	Nesprin-2
LOC102548352	-2.71944	0.151833	0.0157683	4.0452	26.6983	4	27	+		uncharacterized LOC102548352
LOC102556382	-2.71944	0.151833	0.0157683	4.0452	26.6983	4	27	-		transmembrane emp24 domain-containing protein 2-like
Slc25a52	-2.71944	0.151833	0.0157683	4.0452	26.6983	4	27	-	rno:305365	solute carrier family 25, member 52	2e-157	Slc25a51	Solute carrier family 25 member 51
Atp6v1e2	2.72977	6.63348	0.0160803	26.2938	3.95531	26	4	-	rno:366545	ATPase, H transporting, lysosomal V1 subunit E2	1e-112	Atp6v1e2	V-type proton ATPase subunit E 2
Mrpl53	2.72977	6.63348	0.0160803	26.2938	3.95531	26	4	+	rno:362388	mitochondrial ribosomal protein L53	7e-57	Mrpl53	39S ribosomal protein L53, mitochondrial
Prelid2	2.26781	4.81592	0.0161994	33.3729	6.92179	33	7	-	rno:681037	PRELI domain containing 2	2e-102	Prelid2	Prelid2 protein
Shank2	-1.08779	0.470481	0.0162031	93.0396	197.765	92	200	+	rno:171093	SH3 and multiple ankyrin repeat domains 2	0	Shank2	SH3 and multiple ankyrin repeat domains protein 2
Zfp563	-1.08779	0.470481	0.0162031	93.0396	197.765	92	200	+	rno:314584	zinc finger protein 563	0	Zfp563	Protein Zfp563
Rpl22l1	1.02693	2.03769	0.0163098	267.994	131.514	265	133	+	rno:361923	ribosomal protein L22 like 1	2e-57	Rpl22l1	60S ribosomal protein L22-like 1
LOC102551341	-1.10815	0.46389	0.016312	83.9379	180.955	83	183	+		tRNA (adenine(58)-N(1))-methyltransferase, mitochondrial-like
Gtf2a1	-1.00383	0.498675	0.0163487	158.774	318.402	157	322	-	rno:83830	general transcription factor IIA, 1	2e-117	Gtf2a1	Gtf2a1 protein
Acer3	-1.4453	0.367215	0.016387	28.3164	77.1285	28	78	-	rno:499210	alkaline ceramidase 3	7e-152	Acer3	Alkaline ceramidase 3
Zic1	-0.964436	0.512479	0.0164853	234.622	457.827	232	463	-	rno:64618	Zic family member 1	0	Zic1	Zinc finger protein ZIC 1
Ece2	-1.04684	0.484028	0.0165303	116.299	240.285	115	243	-	rno:408243	endothelin-converting enzyme 2	0	Ece2	Endothelin converting enzyme 2
Rnf6	-0.949727	0.51773	0.0165356	288.22	556.709	285	563	+	rno:304271	ring finger protein (C3H2C3 type) 6	0	Rnf6	E3 ubiquitin-protein ligase RNF6
Phlda3	0.944936	1.9251	0.0165381	582.509	302.581	576	306	+	rno:363989	pleckstrin homology-like domain, family A, member 3	8e-68	Phlda3	Pleckstrin homology-like domain family A member 3
Tnfaip8l2	0.930867	1.90642	0.0165499	776.678	407.397	768	412	-	rno:310663	tumor necrosis factor, alpha-induced protein 8-like 2	3e-100	Tnfaip8l2	Tumor necrosis factor alpha-induced protein 8-like protein 2
Ttc14	-1.55211	0.34101	0.0166394	22.2486	65.2625	22	66	+	rno:310314	tetratricopeptide repeat domain 14	0	Ttc14	Tetratricopeptide repeat domain 14
Myt1l	-0.920548	0.528308	0.016824	1387.5	2626.32	1372	2656	+	rno:116668	myelin transcription factor 1-like	0	Myt1l	Myelin transcription factor 1-like protein
Daglb	0.920969	1.89339	0.0168434	1057.82	558.687	1046	565	-	rno:304289	diacylglycerol lipase, beta	0	Daglb	Sn1-specific diacylglycerol lipase beta
Tfeb	0.94728	1.92823	0.0168982	549.136	284.782	543	288	-	rno:316214	transcription factor EB	0	Tfeb	Transcription factor EB
Rbfox1	-0.917881	0.529286	0.0169972	1030.51	1947	1019	1969	-	rno:302920	RNA binding protein, fox-1 homolog (C. elegans) 1	1e-173	Rbfox1	RNA binding protein fox-1 homolog 1
Micu3	-1.17313	0.44346	0.0171187	62.7006	141.402	62	143	-	rno:364601	mitochondrial calcium uptake family, member 3	0	Micu3	Efha2 protein
Adcy2	-0.958542	0.514577	0.0172804	243.723	473.648	241	479	+	rno:81636	adenylate cyclase 2 (brain)	0	Adcy2	Adenylate cyclase type 2
Trim2	-0.91781	0.529312	0.0173424	1237.83	2338.57	1224	2365	-	rno:361970	tripartite motif-containing 2	0	Trim2	Tripartite motif-containing protein 2
LOC682914	-1.11671	0.461146	0.0174493	78.8814	171.067	78	173	-		Protein LOC682914
Cx3cr1	0.919093	1.89093	0.0174961	1039.62	549.788	1028	556	-	rno:171056	chemokine (C-X3-C motif) receptor 1	0	Cx3cr1	C-X3-C chemokine receptor 1
Arpc5l-ps1	2.16029	4.47005	0.0175454	35.3955	7.91061	35	8	-	rno:501132	actin related protein 2/3 complex, subunit 5-like, pseudogene 1
Bin2	0.921668	1.8943	0.0175517	925.339	488.48	915	494	-	rno:366988	bridging integrator 2	0	Bin2	Bridging integrator 2
Cnr1	-0.915752	0.530068	0.017596	917.249	1730.45	907	1750	+	rno:25248	cannabinoid receptor 1 (brain)	0	Cnr1	Cannabinoid receptor 1
Rc3h1	-0.967545	0.511375	0.017931	212.373	415.307	210	420	+	rno:680586	ring finger and CCCH-type domains 1	0	Rc3h1	Roquin-1
Mphosph8	-1.00652	0.497744	0.0180222	147.65	296.648	146	300	+	rno:290270	M-phase phosphoprotein 8	1e-14	Cttnbp2	Cortactin-binding protein 2
Phip	-1.23534	0.424741	0.0180398	49.5537	116.682	49	118	-	rno:315843	pleckstrin homology domain interacting protein	0	Phip	PH-interacting protein
RGD1562101	-1.00016	0.499944	0.018147	154.729	309.503	153	313	-	rno:100362255	similar to very large G-protein coupled receptor 1	0	Gpr98	G-protein-coupled receptor 98
LOC688280	1.15968	2.23407	0.0182414	143.605	64.2737	142	65	-	rno:688280	similar to transmembrane channel-like protein 6 isoform 1
Arhgap25	1.03851	2.0541	0.0183587	237.655	115.693	235	117	-	rno:500246	Rho GTPase activating protein 25	0	Arhgap25	Rho GTPase activating protein 25
Hunk	-1.00059	0.499796	0.018482	152.706	305.547	151	309	+	rno:288275	hormonally upregulated Neu-associated kinase	4e-62	Mark4	Putative uncharacterized protein
Card9	1.23772	2.35825	0.0184949	114.277	48.4525	113	49	-	rno:64171	caspase recruitment domain family, member 9	0	Card9	Caspase recruitment domain-containing protein 9
RGD1302996	0.934789	1.91161	0.0187075	606.78	317.413	600	321	+	rno:294231	hypothetical protein MGC:15854
Abcg3	10.4684	1416.82	0.0187314	14.1582	0	14	0	+	rno:498327	ATP-binding cassette, subfamily G (WHITE), member 3	0	Abcg3	ATP-binding cassette sub-family G member 3
LOC691962	10.4684	1416.82	0.0187314	14.1582	0	14	0	+	rno:691962	hypothetical protein LOC691962
Lepr	10.4684	1416.82	0.0187314	14.1582	0	14	0	+	rno:24536	leptin receptor	0	Lepr	Leptin receptor
Fbxl22	10.4684	1416.82	0.0187314	14.1582	0	14	0	-	rno:363083	F-box and leucine-rich repeat protein 22	2e-122	Fbxl22	F-box and leucine-rich protein 22
Mogat1	10.4684	1416.82	0.0187314	14.1582	0	14	0	+	rno:363261	monoacylglycerol O-acyltransferase 1	7e-35	Mogat2	2-acylglycerol O-acyltransferase 2
Cxcr5	10.4684	1416.82	0.0187314	14.1582	0	14	0	-	rno:29363	chemokine (C-X-C motif) receptor 5	0	Cxcr5	C-X-C chemokine receptor type 5
Sntb2	10.4684	1416.82	0.0187314	14.1582	0	14	0	+	rno:689421	syntrophin, beta 2	0	Sntb2	Syntrophin, basic 2
Ushbp1	10.4684	1416.82	0.0187314	14.1582	0	14	0	-	rno:290629	Usher syndrome 1C binding protein 1	0	Ushbp1	Usher syndrome type-1C protein-binding protein 1
Krtcap3	10.4684	1416.82	0.0187314	14.1582	0	14	0	-	rno:683980	keratinocyte associated protein 3	2e-119	Krtcap3	Krtcap3 protein
Trim43a	10.4684	1416.82	0.0187314	14.1582	0	14	0	+	rno:300884	tripartite motif-containing 43A	9e-135	Trim43c	Tripartite motif-containing protein 43C
Tlr3	10.4684	1416.82	0.0187314	14.1582	0	14	0	+	rno:364594	toll-like receptor 3	0	Tlr3	Putative uncharacterized protein
Ggt6	10.4684	1416.82	0.0187314	14.1582	0	14	0	+	rno:408206	gamma-glutamyl transferase 6	2e-123	Ggt6	Gamma-glutamyltransferase 6
Tsnaxip1	10.4684	1416.82	0.0187314	14.1582	0	14	0	+	rno:498944	translin-associated factor X interacting protein 1	0	Tsnaxip1	Translin-associated factor X-interacting protein 1
RGD1307182	10.4684	1416.82	0.0187314	14.1582	0	14	0	-		similar to RIKEN cDNA B430306N03 gene	4e-78	B430306N03Rik	Triggering receptor expressed on myeloid cells-like 6b
Irg1	10.4684	1416.82	0.0187314	14.1582	0	14	0	+	rno:306127	immunoresponsive gene 1	0	Irg1	Cis-aconitate decarboxylase
RT1-T24-2	10.4684	1416.82	0.0187314	14.1582	0	14	0	-		RT1 class I, locus T24, gene 2
Nfkbiz	10.4684	1416.82	0.0187314	14.1582	0	14	0	+	rno:304005	nuclear factor of kappa light polypeptide gene enhancer in B-cells inhibitor, zeta	2e-134	Nfkbiz	NF-kappa-B inhibitor zeta
Fgfbp1	10.4684	1416.82	0.0187314	14.1582	0	14	0	+	rno:64535	fibroblast growth factor binding protein 1	2e-106	Fgfbp1	Fibroblast growth factor-binding protein 1
Mgat4a	-1.12638	0.458065	0.0187558	73.8249	161.179	73	163	-	rno:367252	mannosyl (alpha-1,3-)-glycoprotein beta-1,4-N-acetylglucosaminyltransferase, isozyme A	0	Mgat4a	Alpha-1,3-mannosyl-glycoprotein 4-beta-N-acetylglucosaminyltransferase A
Coprs	0.948273	1.92956	0.0189081	488.458	253.14	483	256	+	rno:290925	coordinator of PRMT5, differentiation stimulator	1e-29	Coprs	Coordinator of PRMT5 and differentiation stimulator
Sirpa	0.921211	1.8937	0.0192964	4896.71	2585.78	4842	2615	+	rno:25528	signal-regulatory protein alpha	4e-115	Sirpb1b	Protein Sirpb1b
Plekhh1	-1.00875	0.496977	0.0194935	139.559	280.827	138	284	+	rno:314262	pleckstrin homology domain containing, family H (with MyTH4 domain) member 1	0	Plekhh1	Pleckstrin homology domain-containing family H member 1
LOC690276	-1.26285	0.416721	0.0195173	44.4972	106.793	44	108	-	rno:690276	hypothetical protein LOC690276	7e-26	2410004P03Rik	Protein 2410004P03Rik
Mrgpre	0.966297	1.95382	0.0195309	388.339	198.754	384	201	-	rno:404660	MAS-related GPR, member E	7e-142	Mrgpre	MAS-related GPR, member E
LOC100362027	0.908838	1.87753	0.019536	1368.29	728.765	1353	737	-	rno:100362027	ribosomal protein L30-like	2e-63	Rpl30	60S ribosomal protein L30
Ndc80	-1.13281	0.456028	0.0196347	70.791	155.246	70	157	-	rno:301701	NDC80 kinetochore complex component	0	Ndc80	Kinetochore protein NDC80 homolog
Lrrk2	-2.13613	0.22749	0.0197935	8.0904	35.5978	8	36	+	rno:300160	leucine-rich repeat kinase 2	0	Lrrk2	Leucine-rich repeat serine/threonine-protein kinase 2
Adat1	1.16556	2.2432	0.01984	137.537	61.3072	136	62	-	rno:690810	adenosine deaminase, tRNA-specific 1	0	Adat1	tRNA-specific adenosine deaminase 1
Impact	-0.937393	0.522176	0.0198671	293.277	561.653	290	568	+	rno:497198	impact RWD domain protein	3e-155	Impact	Protein IMPACT
Ahr	-4.12412	0.0573478	0.0200375	1.0113	17.7989	1	18	-	rno:25690	aryl hydrocarbon receptor	0	Ahr	Aryl hydrocarbon receptor
Ppl	-4.12412	0.0573478	0.0200375	1.0113	17.7989	1	18	+	rno:302934	periplakin	0	Ppl	Periplakin
LOC290595	-4.12412	0.0573478	0.0200375	1.0113	17.7989	1	18	-	rno:290595	hypothetical gene supported by AF152002	3e-19	2610528A11Rik	RIKEN cDNA 2610528A11 gene
LOC102549842	-4.12412	0.0573478	0.0200375	1.0113	17.7989	1	18	-		zinc finger protein 91-like	0	Zfp748	Mszf54
Scml4	-1.41307	0.375511	0.0200998	29.3277	78.1173	29	79	+	rno:309859	sex comb on midleg-like 4 (Drosophila)	0	Scml4	Sex comb on midleg-like protein 4
Ccnl1	-0.99629	0.501288	0.0202237	150.684	300.603	149	304	-	rno:114121	cyclin L1	0	Ccnl1	Ccnl1 protein
LOC100362709	1.25014	2.37865	0.0202836	108.209	45.486	107	46	+	rno:100362709	proteasome activator complex subunit 2-like
Pik3r5	1.21781	2.32594	0.0204383	117.311	50.4301	116	51	+	rno:497931	phosphoinositide-3-kinase, regulatory subunit 5	0	Pik3r5	Phosphoinositide-3-kinase, regulatory subunit 5, p101
Tex9	-1.44118	0.368267	0.02051	27.3051	74.162	27	75	-	rno:300822	testis expressed 9	0	Tex9	Testis expressed gene 9
Exo1	1.11638	2.16802	0.0205574	160.797	74.162	159	75	+	rno:305000	exonuclease 1	0	Exo1	Exonuclease 1
Gria1	-0.907083	0.533262	0.0206725	763.531	1431.82	755	1448	+	rno:50592	glutamate receptor, ionotropic, AMPA 1	0	Gria1	AMPA-selective glutamate receptor 1 flip type
Fbxw7	-0.914299	0.530602	0.0207809	474.3	893.899	469	904	-	rno:100360914	F-box and WD repeat domain containing 7, E3 ubiquitin protein ligase	0	Fbxw7	F-box/WD repeat-containing protein 7
Snhg11	-1.6609	0.316241	0.0208484	17.1921	54.3855	17	55	+	rno:362256	small nucleolar RNA host gene 11 (non-protein coding)	1e-28	Snhg11	Protein Snhg11
Pdk4	-1.55209	0.341015	0.0212272	21.2373	62.2961	21	63	-	rno:89813	pyruvate dehydrogenase kinase, isozyme 4	0	Pdk4	[Pyruvate dehydrogenase (acetyl-transferring)] kinase isozyme 4, mitochondrial
Ung	0.922614	1.89555	0.021369	652.288	344.112	645	348	-	rno:304577	uracil-DNA glycosylase	4e-163	Ung	Uracil-DNA glycosylase
Abhd17b	-0.948607	0.518132	0.0214285	232.599	448.927	230	454	+	rno:309399	abhydrolase domain containing 17B	5e-173	Abhd17b	Alpha/beta hydrolase domain-containing protein 17B
B4galt1	1.10447	2.1502	0.021448	165.853	77.1285	164	78	-	rno:24390	UDP-Gal:betaGlcNAc beta 1,4- galactosyltransferase, polypeptide 1	0	B4galt1	Beta-1,4-galactosyltransferase 1
Asns	0.915591	1.88634	0.0216046	755.441	400.475	747	405	-	rno:25612	asparagine synthetase (glutamine-hydrolyzing)	0	Asns	Asparagine synthetase [glutamine-hydrolyzing]
Fam184a	-1.14737	0.451449	0.0216469	64.7232	143.38	64	145	-		family with sequence similarity 184, member A	0	Fam184a	Protein Fam184a
Stk38l	0.996872	1.99567	0.0217178	284.175	142.391	281	144	+	rno:691337	serine/threonine kinase 38 like	7e-109	Lats1	Serine/threonine-protein kinase LATS1
Synpr	-1.06496	0.477985	0.0217408	94.0509	196.776	93	199	-	rno:66030	synaptoporin	4e-148	Synpr	Synaptoporin
Col4a3bp	-1.02944	0.489899	0.0217465	115.288	235.341	114	238	+	rno:365652	collagen, type IV, alpha 3 (Goodpasture antigen) binding protein	0	Col4a3bp	Putative uncharacterized protein
LOC103690244	2.3524	5.10671	0.0218228	30.339	5.93296	30	6	+		uncharacterized LOC103690244
Hyls1	-1.23299	0.425434	0.0218385	47.5311	111.737	47	113	-	rno:680262	hydrolethalus syndrome 1	1e-170	Hyls1	Hydrolethalus syndrome protein 1 homolog
Tbck	-0.960239	0.513972	0.0218468	200.237	389.598	198	394	+	rno:295446	TBC1 domain containing kinase	1e-17	Smok3c	Protein Smok3c
Otud6b	-0.986029	0.504865	0.0219327	156.751	310.492	155	314	-	rno:297911	OTU domain containing 6B	2e-165	Otud6b	OTU domain-containing protein 6B
Ccdc163	1.13467	2.19568	0.0219331	147.65	67.2402	146	68	+	rno:298442	coiled-coil domain containing 163	3e-66	Ccdc163	Protein Ccdc163
Fam183b	1.37199	2.58828	0.021964	81.9153	31.6424	81	32	-	rno:287346	family with sequence similarity 183, member B	2e-73	Fam183b	Protein FAM183B
Micall2	1.30783	2.47568	0.0219788	93.0396	37.5754	92	38	+	rno:288515	MICAL-like 2	0	Micall2	MICAL-like protein 2
Wsb1	-0.913115	0.531037	0.0220659	436.882	822.704	432	832	-	rno:303336	WD repeat and SOCS box-containing 1	0	Wsb1	WD repeat and SOCS box-containing protein 1
Pik3ca	-0.922167	0.527716	0.0222251	342.831	649.659	339	657	+	rno:170911	phosphatidylinositol-4,5-bisphosphate 3-kinase, catalytic subunit alpha	0	Pik3ca	Phosphatidylinositol 4,5-bisphosphate 3-kinase catalytic subunit alpha isoform
Ncf2	0.94878	1.93024	0.0223557	423.735	219.519	419	222	+	rno:364018	neutrophil cytosolic factor 2	0	Ncf2	Neutrophil cytosol factor 2
Prokr2	-0.929753	0.524948	0.0224624	293.277	558.687	290	565	-	rno:192649	prokineticin receptor 2	0	Prokr2	Prokineticin receptor 2
LOC102553495	-0.905592	0.533813	0.022662	553.181	1036.29	547	1048	-		uncharacterized LOC102553495
Orai1	0.981588	1.97464	0.0226645	310.469	157.223	307	159	-	rno:304496	ORAI calcium release-activated calcium modulator 1	7e-152	Orai1	Calcium release-activated calcium channel 1
LOC102549320	-1.10325	0.465465	0.0226926	76.8588	165.134	76	167	+		uncharacterized LOC102549320
Col6a1	1.00043	2.00059	0.0227542	271.028	135.469	268	137	+	rno:294337	collagen, type VI, alpha 1	0	Col6a1	Procollagen type VI alpha 1
LOC689980	-1.96652	0.25587	0.0229508	10.113	39.5531	10	40	+		similar to HBxAg transactivated protein 2
Jmjd1c	-0.900386	0.535744	0.0230731	966.803	1804.61	956	1825	-	rno:171120	jumonji domain containing 1C	0	Jmjd1c	Probable JmjC domain-containing histone demethylation protein 2C
Otx1	-1.15859	0.447951	0.0232108	60.678	135.469	60	137	-	rno:25646	orthodenticle homeobox 1	0	Otx1	Homeobox protein OTX1
Siah3	-1.15859	0.447951	0.0232108	60.678	135.469	60	137	+	rno:692004	siah E3 ubiquitin protein ligase family member 3	9e-141	Siah3	E3 ubiquitin-protein ligase
Aebp1	-0.947463	0.518544	0.0234808	219.452	423.218	217	428	+	rno:305494	AE binding protein 1	0	Aebp1	Adipocyte enhancer-binding protein 1
RGD1309676	-0.963571	0.512786	0.0235358	184.057	358.944	182	363	+	rno:361118	similar to RIKEN cDNA 5730469M10	6e-108	Fam213a	Redox-regulatory protein FAM213A
Itpr1	-0.89915	0.536202	0.023548	851.514	1588.06	842	1606	+	rno:25262	inositol 1,4,5-trisphosphate receptor, type 1	0	Itpr1	Inositol 1,4,5-trisphosphate receptor type 1
LOC103694857	1.17912	2.26438	0.0237613	125.401	55.3743	124	56	-		hemoglobin subunit beta-2	5e-69	Hbb-bs	Protein Hbb-bs
Dyrk2	-0.923908	0.527079	0.0237669	305.413	579.452	302	586	-	rno:314862	dual-specificity tyrosine-(Y)-phosphorylation regulated kinase 2	0	Dyrk2	Dual specificity tyrosine-phosphorylation-regulated kinase 2
Uqcrb	1.05471	2.0773	0.0237893	197.203	94.9273	195	96	-	rno:362897	ubiquinol-cytochrome c reductase binding protein	7e-59	Uqcrb	Cytochrome b-c1 complex subunit 7
Nfatc2ip	-1.0885	0.47025	0.0238371	80.904	172.056	80	174	-	rno:308983	nuclear factor of activated T-cells, cytoplasmic, calcineurin-dependent 2 interacting protein	4e-112	Nfatc2ip	NFATC2-interacting protein
Aspa	2.22343	4.67002	0.0238797	32.3616	6.92179	32	7	-	rno:79251	aspartoacylase	3e-77	Acy3	N-acyl-aromatic-L-amino acid amidohydrolase (carboxylate-forming)
Relb	1.02596	2.03631	0.0238854	227.542	111.737	225	113	-	rno:100360982	v-rel avian reticuloendotheliosis viral oncogene homolog B	0	Relb	Transcription factor RelB
Nrg2	-1.89952	0.268033	0.0241367	11.1243	41.5307	11	42	-	rno:432361	neuregulin 2	0	Nrg2	Pro-neuregulin-2, membrane-bound isoform
Mmp16	-0.967538	0.511378	0.0242341	173.944	340.156	172	344	+	rno:65205	matrix metallopeptidase 16	0	Mmp16	Matrix metalloproteinase-16
LOC100362397	-2.66502	0.15767	0.0243049	4.0452	25.7095	4	26	+		ubiquitin-conjugating enzyme E2L 3-like
Klf12	-0.921905	0.527811	0.0243273	308.446	584.396	305	591	-	rno:306110	Kruppel-like factor 12	0	Klf12	Krueppel-like factor 12
LOC690068	1.54654	2.92115	0.0243751	60.678	20.7654	60	21	-		similar to TatD DNase domain containing 1	2e-149	Tatdn1	Putative deoxyribonuclease TATDN1
Azin1	-0.906738	0.53339	0.0243975	440.927	826.659	436	836	-	rno:58961	antizyme inhibitor 1	0	Azin1	Antizyme inhibitor 1
Mbd4	-1.21068	0.432064	0.0246262	49.5537	114.704	49	116	-	rno:680915	methyl-CpG binding domain protein 4	1e-15	Mecp2	Methyl-CpG-binding protein 2
Trpv2	0.894911	1.8595	0.0246608	1881.02	1011.57	1860	1023	+	rno:29465	transient receptor potential cation channel, subfamily V, member 2	0	Trpv2	Transient receptor potential cation channel subfamily V member 2
Angptl4	-0.896814	0.537071	0.024764	1088.16	2026.11	1076	2049	-	rno:362850	angiopoietin-like 4	8e-54	Angptl3	Angiopoietin-like 3
Oscar	-10.436	0.000721836	0.02486	0	13.8436	0	14	+	rno:292537	osteoclast associated, immunoglobulin-like receptor	9e-127	Oscar	Oscar protein
Adra2b	-10.436	0.000721836	0.02486	0	13.8436	0	14	+	rno:24174	adrenoceptor alpha 2B	0	Adra2b	Alpha-2B adrenergic receptor
Rad54b	-10.436	0.000721836	0.02486	0	13.8436	0	14	+	rno:313063	RAD54 homolog B (S. cerevisiae)	0	Rad54b	DNA repair and recombination protein RAD54B
Cacng6	-10.436	0.000721836	0.02486	0	13.8436	0	14	-	rno:140727	calcium channel, voltage-dependent, gamma subunit 6	2e-31	Cacng1	Voltage-dependent calcium channel gamma-1 subunit
LOC102548467	-10.436	0.000721836	0.02486	0	13.8436	0	14	+		uncharacterized LOC102548467
LOC102548282	-10.436	0.000721836	0.02486	0	13.8436	0	14	-		uncharacterized LOC102548282
Uevld	-10.436	0.000721836	0.02486	0	13.8436	0	14	-	rno:691172	UEV and lactate/malate dehyrogenase domains	6e-59	Ldha	L-lactate dehydrogenase A chain
Aldh3a1	-10.436	0.000721836	0.02486	0	13.8436	0	14	+	rno:25375	aldehyde dehydrogenase 3 family, member A1	0	Aldh3a1	Aldehyde dehydrogenase, dimeric NADP-preferring
Dkk2	-10.436	0.000721836	0.02486	0	13.8436	0	14	+	rno:295445	dickkopf WNT signaling pathway inhibitor 2	6e-141	Dkk2	Dickkopf-related protein 2
Kcnt2	-10.436	0.000721836	0.02486	0	13.8436	0	14	+	rno:304827	potassium channel, subfamily T, member 2	0	Kcnt2	Protein Kcnt2
Cyp39a1	-10.436	0.000721836	0.02486	0	13.8436	0	14	-	rno:301264	cytochrome P450, family 39, subfamily a, polypeptide 1	0	Cyp39a1	Cyp39a1 protein
Lrrc34	-10.436	0.000721836	0.02486	0	13.8436	0	14	+	rno:499589	leucine rich repeat containing 34	0	Lrrc34	Lrrc34 protein
LOC100910483	-10.436	0.000721836	0.02486	0	13.8436	0	14	-		ankyrin repeat domain-containing protein 12-like	0	Ankrd12	Protein Ankrd12
LOC102546373	-10.436	0.000721836	0.02486	0	13.8436	0	14	+		uncharacterized LOC102546373
Katnal2	-10.436	0.000721836	0.02486	0	13.8436	0	14	-	rno:307253	katanin p60 subunit A-like 2	0	Katnal2	Katanin p60 ATPase-containing subunit A-like 2
LOC102550895	-10.436	0.000721836	0.02486	0	13.8436	0	14	-		uncharacterized LOC102550895
Leprel1	-10.436	0.000721836	0.02486	0	13.8436	0	14	+	rno:288016	leprecan-like 1	0	Leprel1	Prolyl 3-hydroxylase 2
LOC102549576	-10.436	0.000721836	0.02486	0	13.8436	0	14	-		uncharacterized LOC102549576
Mir124-2	-10.436	0.000721836	0.02486	0	13.8436	0	14	+	rno:100314024	microRNA 124-2
Cxcl10	4.10621	17.2223	0.0248861	17.1921	0.988826	17	1	+	rno:245920	chemokine (C-X-C motif) ligand 10	2e-39	Cxcl10	C-X-C motif chemokine 10
Rpl38-ps2	4.10621	17.2223	0.0248861	17.1921	0.988826	17	1	+		ribosomal protein L38, pseudogene 2
Mybl2	0.903891	1.87111	0.0250105	814.096	435.084	805	440	+	rno:296344	myeloblastosis oncogene-like 2	1e-168	Mybl2	Myb-related protein B
Nxt1	0.917111	1.88833	0.025051	595.656	315.436	589	319	+	rno:296219	nuclear transport factor 2-like export factor 1	4e-79	Nxt1	NTF2-related export protein 1
LOC103689936	1.01406	2.01958	0.0251715	237.655	117.67	235	119	-		WW domain-binding protein 11	0	Wbp11	Phka1 protein
LOC102553244	2.67321	6.37845	0.0251742	25.2825	3.95531	25	4	-		uncharacterized LOC102553244
LOC103693110	2.67321	6.37845	0.0251742	25.2825	3.95531	25	4	-		thrombospondin type-1 domain-containing protein 4-like	2e-169	Thsd4	Thrombospondin, type I, domain containing 4
Pkib	2.67321	6.37845	0.0251742	25.2825	3.95531	25	4	+	rno:24678	protein kinase (cAMP-dependent, catalytic) inhibitor beta	1e-46	Pkib	cAMP-dependent protein kinase inhibitor beta
Skiv2l2	-0.982079	0.50625	0.0252892	149.672	295.659	148	299	-	rno:365668	superkiller viralicidic activity 2-like 2 (S. cerevisiae)	0	Skiv2l2	MKIAA0052 protein
Ogdh	0.895019	1.85964	0.0253388	1184.23	636.804	1171	644	+	rno:360975	oxoglutarate (alpha-ketoglutarate) dehydrogenase (lipoamide)	0	Ogdh	2-oxoglutarate dehydrogenase, mitochondrial
Acvr2b	-1.04788	0.48368	0.0253966	97.0848	200.732	96	203	+	rno:25366	activin A receptor, type IIB	0	Acvr2a	Serine/threonine-protein kinase receptor
Rfx2	-1.04788	0.48368	0.0253966	97.0848	200.732	96	203	+	rno:301121	regulatory factor X, 2 (influences HLA class II expression)	0	Rfx2	DNA-binding protein RFX2
Steap2	1.24522	2.37055	0.0256854	103.153	43.5084	102	44	+	rno:312052	STEAP family member 2, metalloreductase	0	Steap2	Steap2 protein
Chodl	-2.20302	0.217182	0.0258289	7.0791	32.6313	7	33	+	rno:288289	chondrolectin	1e-161	Chodl	Chodl protein
Tekt3	-2.20302	0.217182	0.0258289	7.0791	32.6313	7	33	+	rno:287392	tektin 3	0	Tekt3	Tektin 3
Gpr158	-2.20302	0.217182	0.0258289	7.0791	32.6313	7	33	+	rno:291352	G protein-coupled receptor 158	0	Gpr158	Putative uncharacterized protein
Calml4	-1.78992	0.289188	0.0258441	13.1469	45.486	13	46	+	rno:691455	calmodulin-like 4	6e-32	Calm2	calmodulin 2
Shisa9	1.11138	2.16053	0.0260387	151.695	70.2067	150	71	-	rno:100361134	shisa family member 9	0	Shisa9	Protein shisa-9
Gabrr2	1.61684	3.06702	0.0261621	54.6102	17.7989	54	18	+	rno:29695	gamma-aminobutyric acid (GABA) A receptor, rho 2	0	Gabrr2	Gamma-aminobutyric acid receptor subunit rho-2
Ccdc151	1.61684	3.06702	0.0261621	54.6102	17.7989	54	18	-		coiled-coil domain containing 151	0	Ccdc151	Coiled-coil domain-containing protein 151
Golgb1	-0.902013	0.535139	0.0262703	443.961	829.625	439	839	-	rno:192243	golgin B1	0	Golgb1	Golgb1 protein
Mylip	-1.00174	0.499398	0.026454	126.412	253.14	125	256	-	rno:306825	myosin regulatory light chain interacting protein	0	Mylip	Putative uncharacterized protein
Dusp14	1.29206	2.44878	0.0265037	92.0283	37.5754	91	38	-	rno:360580	dual specificity phosphatase 14	2e-115	Dusp14	Dual-specificity protein phosphatase 14
Syt12	2.0312	4.08744	0.0265758	36.4068	8.89944	36	9	-	rno:191595	synaptotagmin XII	0	Syt12	Synaptotagmin XII
Xkr4	-1.48801	0.356504	0.026678	23.2599	65.2625	23	66	-	rno:297801	XK, Kell blood group complex subunit-related family, member 4	0	Xkr4	MKIAA1889 protein
B3galt5	1.95734	3.88345	0.0273404	38.4294	9.88826	38	10	+	rno:288161	UDP-Gal:betaGlcNAc beta 1,3-galactosyltransferase, polypeptide 5	4e-179	B3galt5	Beta-1,3-galactosyltransferase 5
Ms4a6c	1.70982	3.2712	0.0275522	48.5424	14.8324	48	15	+	rno:690930	membrane-spanning 4-domains, subfamily A, member 6C	4e-91	Ms4a6c	Ms4a6c protein
Alox15	1.70982	3.2712	0.0275522	48.5424	14.8324	48	15	-	rno:81639	arachidonate 15-lipoxygenase	5e-143	Alox5	Arachidonate 5-lipoxygenase, isoform CRA_a
Taf5	-1.125	0.458502	0.0275562	65.7345	143.38	65	145	+	rno:294018	TAF5 RNA polymerase II, TATA box binding protein (TBP)-associated factor	0	Taf5	Transcription initiation factor TFIID subunit 5
Cox7a2l2	1.45428	2.74021	0.0276097	67.7571	24.7207	67	25	+	rno:688386	cytochrome c oxidase subunit VIIa polypeptide 2-like 2	6e-42	Cox7a2	Cytochrome c oxidase subunit 7A2, mitochondrial
Frat2	1.11361	2.16386	0.0276281	147.65	68.229	146	69	-	rno:679110	frequently rearranged in advanced T-cell lymphomas 2	2e-81	Frat2	GSK-3-binding protein FRAT2
Pi4k2b	-1.24156	0.422915	0.0277244	43.4859	102.838	43	104	-	rno:305419	phosphatidylinositol 4-kinase type 2 beta	0	Pi4k2b	Phosphatidylinositol 4-kinase type 2-beta
Pcdh7	-0.959076	0.514386	0.0277505	172.932	336.201	171	340	-	rno:360942	protocadherin 7	0	Pcdh7	Protein Pcdh7
Lbp	1.79062	3.45963	0.0280058	44.4972	12.8547	44	13	+	rno:29469	lipopolysaccharide binding protein	0	Lbp	Lipopolysaccharide-binding protein
Pld2	-0.896325	0.537253	0.028022	472.277	879.067	467	889	+	rno:25097	phospholipase D2	2e-162	Pld1	Phospholipase D1
LOC102548228	-0.983013	0.505922	0.0280359	140.571	277.86	139	281	+		basic immunoglobulin-like variable motif-containing protein-like	0	Bivm	Basic immunoglobulin-like variable motif-containing protein
Tfap2d	-2.0955	0.233988	0.0282774	8.0904	34.6089	8	35	+	rno:301284	transcription factor AP-2 delta	2e-160	Tfap2d	Transcription factor AP-2-delta
Acot1	-0.888373	0.540223	0.0283473	814.096	1506.97	805	1524	+	rno:50559	acyl-CoA thioesterase 1	0	Acot1	Acyl-coenzyme A thioesterase 1
Hmbox1	-0.888225	0.540278	0.0284123	935.452	1731.44	925	1751	-	rno:305968	homeobox containing 1	0	Hmbox1	Homeobox-containing protein 1
Hsf2	-0.907298	0.533183	0.0287796	333.729	625.927	330	633	+	rno:64441	heat shock transcription factor 2	0	Hsf2	Heat shock factor protein 2
Serpinf1	0.984185	1.9782	0.0288118	267.994	135.469	265	137	-	rno:287526	serpin peptidase inhibitor, clade F (alpha-2 antiplasmin, pigment epithelium derived factor), member 1	0	Serpinf1	Pigment epithelium-derived factor
Nfib	-0.88786	0.540415	0.0289185	1091.19	2019.18	1079	2042	-	rno:29227	nuclear factor I/B	0	Nfib	Nuclear factor I/B
Txndc16	-0.90063	0.535653	0.0293089	379.237	708	375	716	-	rno:361025	thioredoxin domain containing 16	0	Txndc16	Thioredoxin domain-containing protein 16
LOC102555191	2.46299	5.5136	0.0293477	27.3051	4.94413	27	5	-		zinc finger protein 761-like
Mpp5	-1.05593	0.480987	0.0293488	87.9831	182.933	87	185	+	rno:314259	membrane protein, palmitoylated 5 (MAGUK p55 subfamily member 5)	0	Mpp5	Membrane protein, palmitoylated 5 (MAGUK p55 subfamily member 5)
LOC102548459	-2.90206	0.13378	0.0293834	3.0339	22.743	3	23	+		wiskott-Aldrich syndrome protein family member 1-like
Cyp27b1	-2.45068	0.182925	0.0293859	5.0565	27.6871	5	28	+	rno:114700	cytochrome P450, family 27, subfamily b, polypeptide 1	0	Cyp27b1	25-hydroxyvitamin D-1 alpha hydroxylase, mitochondrial
Mamdc2	-1.26015	0.4175	0.0294997	40.452	96.905	40	98	-	rno:309410	MAM domain containing 2	0	Mamdc2	Putative uncharacterized protein
Gpr88	-0.989891	0.503516	0.029833	129.446	257.095	128	260	-	rno:64443	G-protein coupled receptor 88	0	Gpr88	Probable G-protein coupled receptor 88
Cdc42bpg	1.00705	2.00979	0.0299756	228.554	113.715	226	115	+	rno:293693	CDC42 binding protein kinase gamma (DMPK-like)	0	Cdc42bpg	Putative uncharacterized protein
Srek1ip1	-2.00592	0.248977	0.0302879	9.1017	36.5866	9	37	+	rno:361888	SREK1-interacting protein 1	3e-31	Srek1ip1	Protein SREK1IP1
Nsrp1	-1.13737	0.454586	0.0304283	60.678	133.492	60	135	+	rno:303346	nuclear speckle splicing regulatory protein 1	0	Ccdc55	Ccdc55 protein
Msi2	-0.884728	0.54159	0.030633	679.593	1254.82	672	1269	-	rno:360596	musashi RNA-binding protein 2	3e-101	Msi1	RNA-binding protein Musashi homolog 1
LOC103692946	-1.38873	0.381902	0.0310148	28.3164	74.162	28	75	+		ubiquitin-conjugating enzyme E2 S-like
Ifitm10	0.897473	1.8628	0.0310181	670.492	359.933	663	364	-	rno:293632	interferon induced transmembrane protein 10	9e-44	Ifitm10	Interferon-induced transmembrane protein 10
Bend4	-0.914681	0.530461	0.0311352	266.983	503.313	264	509	+	rno:681008	BEN domain containing 4	0	Bend4	BEN domain-containing protein 4
Tubb6	0.881265	1.84199	0.031227	1364.24	740.631	1349	749	+	rno:307351	tubulin, beta 6 class V	0	Tubb6	Putative uncharacterized protein
Slk	-0.916124	0.529931	0.0312854	259.904	490.458	257	496	+	rno:54308	STE20-like kinase	0	Slk	Slk protein
Heg1	-0.889737	0.539712	0.0314663	462.164	856.324	457	866	-	rno:689710	heart development protein with EGF-like domains 1	0	Heg1	Protein HEG homolog 1
LOC498453	-0.958375	0.514636	0.0318727	159.785	310.492	158	314	+	rno:498453	similar to transcription elongation factor A 1 isoform 2	1e-170	Tcea1	Transcription elongation factor A protein 1
Naf1	-1.11721	0.460986	0.0319571	64.7232	140.413	64	142	-	rno:306387	nuclear assembly factor 1 ribonucleoprotein	1e-170	Naf1	H/ACA ribonucleoprotein complex non-core subunit NAF1
LOC100360527	2.90268	7.47816	0.0322122	22.2486	2.96648	22	3	-		growth factor receptor-bound protein 2-like
LOC102548161	2.90268	7.47816	0.0322122	22.2486	2.96648	22	3	-		uncharacterized LOC102548161
Arl5c	2.90268	7.47816	0.0322122	22.2486	2.96648	22	3	-	rno:497990	ADP-ribosylation factor-like 5C	2e-97	Arl5c	ADP-ribosylation factor-like protein 5C
Rpl12-ps1	2.90268	7.47816	0.0322122	22.2486	2.96648	22	3	+	rno:296644	ribosomal protein L12, pseudogene 1
Nrip1	-0.902182	0.535077	0.0322336	319.571	597.251	316	604	-	rno:304157	nuclear receptor interacting protein 1	0	Nrip1	Nuclear receptor-interacting protein 1
Ppfibp2	1.20558	2.3063	0.0322449	107.198	46.4748	106	47	+	rno:308918	PTPRF interacting protein, binding protein 2 (liprin beta 2)	0	Ppfibp2	Protein tyrosine phosphatase, receptor-type, F interacting protein, binding protein 2, isoform CRA_a
Chdh	1.02512	2.03512	0.0322675	201.249	98.8826	199	100	+	rno:290551	choline dehydrogenase	0	Chdh	Putative uncharacterized protein
Csrnp1	1.02512	2.03512	0.0322675	201.249	98.8826	199	100	-	rno:363165	cysteine-serine-rich nuclear protein 1	0	Csrnp1	Cysteine/serine-rich nuclear protein 1
Actg2	1.5429	2.91381	0.0323443	57.6441	19.7765	57	20	-	rno:25365	actin, gamma 2, smooth muscle, enteric	0	Actg2	Actin, gamma-enteric smooth muscle
LOC691853	0.93085	1.9064	0.0324228	388.339	203.698	384	206	-	rno:691853	similar to COX10 homolog, cytochrome c oxidase assembly protein, heme A: farnesyltransferase	0	Cox10	Putative uncharacterized protein
Hcst	2.3035	4.93655	0.0325981	29.3277	5.93296	29	6	-	rno:474146	hematopoietic cell signal transducer	1e-30	Hcst	Hcst protein
Impad1	2.3035	4.93655	0.0325981	29.3277	5.93296	29	6	-	rno:312952	inositol monophosphatase domain containing 1	0	Impad1	Inositol monophosphatase 3
LOC102549059	2.3035	4.93655	0.0325981	29.3277	5.93296	29	6	-		N-acetyllactosaminide beta-1,6-N-acetylglucosaminyl-transferase-like	9e-109	Gcnt2	Beta-1,6-N-acetylglucosaminyltransferase B
Reep4	0.954623	1.93807	0.0326556	310.469	160.19	307	162	+	rno:306014	receptor accessory protein 4	2e-133	Reep4	Receptor expression-enhancing protein 4
RGD1304728	-0.907488	0.533112	0.0326722	285.187	534.955	282	541	-	rno:360560	similar to 4933427D14Rik protein
Osgin2	1.15781	2.23118	0.033026	121.356	54.3855	120	55	-	rno:313085	oxidative stress induced growth inhibitor family member 2	0	Osgin2	Protein Osgin2
Zic4	-3.28312	0.102726	0.0336051	2.0226	19.7765	2	20	+	rno:315882	Zic family member 4
Gabrb3	-0.967529	0.511381	0.0336276	143.605	280.827	142	284	+	rno:24922	gamma-aminobutyric acid (GABA) A receptor, beta 3	0	Gabrb3	Gamma-aminobutyric acid receptor subunit beta-3
Eno4	-2.28762	0.204814	0.033723	6.0678	29.6648	6	30	+	rno:292138	enolase family member 4	0	Eno4	Enolase-like protein ENO4
LOC102551435	-2.28762	0.204814	0.033723	6.0678	29.6648	6	30	-		endothelin-converting enzyme 2-like	2e-91	Ece2	Endothelin converting enzyme 2
Kdm4c	-1.0264	0.490935	0.0340218	97.0848	197.765	96	200	+	rno:298144	lysine (K)-specific demethylase 4C	0	Kdm4c	Jumonji domain containing 2C
RGD1565641	-1.48501	0.357246	0.034086	22.2486	62.2961	22	63	+	rno:499567	RGD1565641	6e-48	1810022K09Rik	RIKEN cDNA 1810022K09 gene
Ikzf2	-1.50556	0.352194	0.0345074	21.2373	60.3184	21	61	-	rno:301476	IKAROS family zinc finger 2	0	Ikzf2	Zinc finger protein Helios
LOC103690947	10.3616	1315.69	0.0346399	13.1469	0	13	0	+		uncharacterized LOC103690947
Ankrd2	10.3616	1315.69	0.0346399	13.1469	0	13	0	+	rno:309374	ankyrin repeat domain 2 (stretch responsive muscle)	3e-173	Ankrd2	Ankyrin repeat domain-containing protein 2
LOC102553129	10.3616	1315.69	0.0346399	13.1469	0	13	0	+		uncharacterized LOC102553129
Lax1	10.3616	1315.69	0.0346399	13.1469	0	13	0	+	rno:498232	lymphocyte transmembrane adaptor 1	0	Lax1	Lymphocyte transmembrane adapter 1
Pou2f3	10.3616	1315.69	0.0346399	13.1469	0	13	0	-	rno:116544	POU class 2 homeobox 3	0	Pou2f3	POU domain protein
Atp4a	10.3616	1315.69	0.0346399	13.1469	0	13	0	+	rno:24216	ATPase, H+/K+ exchanging, alpha polypeptide	0	Atp4a	Potassium-transporting ATPase alpha chain 1
LOC102553514	10.3616	1315.69	0.0346399	13.1469	0	13	0	+		uncharacterized LOC102553514
RGD1560925	10.3616	1315.69	0.0346399	13.1469	0	13	0	-	rno:501196	similar to 2610034M16Rik protein
LOC103691415	10.3616	1315.69	0.0346399	13.1469	0	13	0	+		uncharacterized LOC103691415
LOC102547294	10.3616	1315.69	0.0346399	13.1469	0	13	0	-		mucin-17-like	0	Gm16486	predicted gene 16486
Spidr	-1.10298	0.465555	0.0347967	66.7458	143.38	66	145	-	rno:498119	scaffolding protein involved in DNA repair
RGD1306462	-1.52783	0.346799	0.0348802	20.226	58.3408	20	59	-		similar to RIKEN cDNA 1700019P01
Vwa5b1	2.17764	4.52413	0.0350093	31.3503	6.92179	31	7	-	rno:313653	von Willebrand factor A domain containing 5B1	0	Vwa5b1	von Willebrand factor A domain-containing protein 5B1
Satb1	-0.88841	0.540209	0.035056	388.339	718.877	384	727	+	rno:316164	SATB homeobox 1	0	Satb1	DNA-binding protein SATB1
Bptf	-0.875989	0.54488	0.0351343	1019.39	1870.86	1008	1892	-		bromodomain PHD finger transcription factor	0	Bptf	Protein Bptf
LOC100910774	-1.7141	0.304792	0.0352431	14.1582	46.4748	14	47	+		uncharacterized LOC100910774
Dgkg	-1.6394	0.32099	0.0356075	16.1808	50.4301	16	51	+	rno:25666	diacylglycerol kinase, gamma	0	Dgkg	Diacylglycerol kinase gamma
Bcl3	1.64651	3.13076	0.0360457	49.5537	15.8212	49	16	-	rno:680611	B-cell CLL/lymphoma 3	0	Bcl3	B-cell lymphoma 3 protein homolog
Vcam1	-0.932209	0.524055	0.0363147	188.102	358.944	186	363	-	rno:25361	vascular cell adhesion molecule 1	0	Vcam1	Vascular cell adhesion protein 1
C1ql3	-1.25859	0.417952	0.0367103	38.4294	91.9609	38	93	-	rno:680404	complement component 1, q subcomponent-like 3	3e-148	C1ql3	Complement C1q-like protein 3
Zbtb25	-0.938052	0.521937	0.0370415	174.955	335.212	173	339	-	rno:314245	zinc finger and BTB domain containing 25	0	Zbtb25	Protein Zbtb25
LOC102556093	-0.90044	0.535723	0.0372083	278.107	519.134	275	525	+		uncharacterized LOC102556093
LOC103692385	-2.15864	0.223967	0.037305	7.0791	31.6424	7	32	-		receptor-type tyrosine-protein phosphatase delta-like	2e-67	Ptprd	Protein-tyrosine-phosphatase
Dzip3	-1.01917	0.493402	0.0374605	97.0848	196.776	96	199	+	rno:303963	DAZ interacting zinc finger protein 3	0	Dzip3	E3 ubiquitin-protein ligase DZIP3
LOC103694902	1.71619	3.28569	0.0375315	45.5085	13.8436	45	14	-		ubiquitin-conjugating enzyme E2 B	2e-87	Ube2b	Ubiquitin-conjugating enzyme E2B, RAD6 homology (S. cerevisiae), isoform CRA_b
Gnpnat1	-1.26569	0.415899	0.0375945	37.4181	89.9832	37	91	-	rno:498486	glucosamine-phosphate N-acetyltransferase 1	3e-106	Gnpnat1	Putative uncharacterized protein
Efhc1	-1.08946	0.469938	0.0377331	68.7684	146.346	68	148	+	rno:301295	EF-hand domain (C-terminal) containing 1	0	Efhc1	EF-hand domain containing 1
Tmtc1	-0.957406	0.514982	0.0382949	144.616	280.827	143	284	-	rno:362465	transmembrane and tetratricopeptide repeat containing 1	4e-68	Tmtc4	Transmembrane and TPR repeat-containing protein 4
Mtdh	-0.957406	0.514982	0.0382949	144.616	280.827	143	284	+	rno:170910	metadherin	0	Mtdh	Protein LYRIC
Mcm5	0.868638	1.82594	0.0382974	1505.83	824.681	1489	834	+	rno:291885	minichromosome maintenance complex component 5	0	Mcm5	DNA replication licensing factor MCM5
Slc2a5	1.91887	3.78128	0.0383692	37.4181	9.88826	37	10	+	rno:65197	solute carrier family 2 (facilitated glucose/fructose transporter), member 5	2e-123	Slc2a9	Solute carrier family 2 (Facilitated glucose transporter), member 9
Galnt13	1.80414	3.49222	0.0384442	41.4633	11.8659	41	12	+	rno:311039	polypeptide N-acetylgalactosaminyltransferase 13	0	Galnt13	Polypeptide N-acetylgalactosaminyltransferase 13
Cap2	-1.03092	0.489397	0.0385539	90.0057	183.922	89	186	-	rno:116653	CAP, adenylate cyclase-associated protein, 2 (yeast)	0	Cap2	Adenylyl cyclase-associated protein 2
LOC100909664	-1.11353	0.462162	0.0388193	61.6893	133.492	61	135	+		centrosomal protein of 170 kDa-like	0	Cep170	Centrosomal protein of 170 kDa
LOC103691884	2.61434	6.12341	0.0391524	24.2712	3.95531	24	4	-		uncharacterized LOC103691884
Rgr	3.27382	9.67206	0.0392801	19.2147	1.97765	19	2	-	rno:306307	retinal G protein coupled receptor	3e-164	Rgr	Putative uncharacterized protein
Pvalb	3.27382	9.67206	0.0392801	19.2147	1.97765	19	2	-	rno:25269	parvalbumin	8e-53	Pvalb	Parvalbumin alpha
Mirlet7c-2	-1.281	0.41151	0.0394513	35.3955	86.0279	35	87	+	rno:100314224	microRNA let-7c-2
Akap11	-0.870633	0.546907	0.0400189	560.26	1024.42	554	1036	-	rno:498549	A kinase (PRKA) anchor protein 11	0	Akap11	Protein Akap11
Rgl3	-2.05369	0.240868	0.0401786	8.0904	33.6201	8	34	-	rno:300444	ral guanine nucleotide dissociation stimulator-like 3	2e-168	Rgl3	Ral guanine nucleotide dissociation stimulator-like 3
Arid4a	-0.919389	0.528733	0.0402207	200.237	378.721	198	383	+	rno:314205	AT rich interactive domain 4A (Rbp1 like)	0	Arid4a	Arid4a protein
LOC687565	-0.944075	0.519763	0.0403129	156.751	301.592	155	305	-	rno:687565	similar to density-regulated protein	5e-103	Denr	Density-regulated protein
RGD1561672	-1.41083	0.376095	0.0406388	25.2825	67.2402	25	68	-	rno:305610	similar to novel protein	0	Eml6	Echinoderm microtubule-associated protein-like 6
Sync	-1.181	0.441044	0.0408672	47.5311	107.782	47	109	+	rno:362606	syncoilin, intermediate filament protein	2e-12	Ina	Alpha-internexin
Asf1b	0.954087	1.93735	0.0412158	272.04	140.413	269	142	+	rno:304648	anti-silencing function 1B histone chaperone	6e-113	Asf1b	Histone chaperone ASF1B
Smurf2	-0.871453	0.546596	0.0412335	486.435	889.944	481	900	-	rno:303614	SMAD specific E3 ubiquitin protein ligase 2	0	Smurf2	E3 ubiquitin-protein ligase SMURF2
Lats1	-0.869386	0.54738	0.0412593	538.011	982.894	532	994	+		large tumor suppressor kinase 1	0	Lats1	Serine/threonine-protein kinase LATS1
Ggct	-1.29797	0.406699	0.0414282	33.3729	82.0726	33	83	-	rno:362368	gamma-glutamyl cyclotransferase	2e-103	Ggct	Gamma-glutamylcyclotransferase
Tssk4	-1.42664	0.371997	0.0414515	24.2712	65.2625	24	66	+	rno:290229	testis-specific serine kinase 4	3e-150	Tssk4	Testis-specific serine kinase 4, isoform CRA_b
Elmod2	-1.42664	0.371997	0.0414515	24.2712	65.2625	24	66	-	rno:688581	ELMO/CED-12 domain containing 2	5e-171	Elmod2	ELMO domain-containing protein 2
Pcdha3	-1.03384	0.48841	0.041639	85.9605	176.011	85	178	+	rno:116780	protocadherin alpha 3	0	Pcdha3	Protocadherin alpha 3
Il1rap	1.51737	2.86269	0.0417018	56.6328	19.7765	56	20	-	rno:25466	interleukin 1 receptor accessory protein	4e-87	Il1rapl2	Interleukin 1 receptor accessory protein-like 2
Foxn3	-0.864175	0.549361	0.042367	891.966	1623.65	882	1642	-	rno:314374	forkhead box N3	0	Foxn3	Forkhead box protein N3
Evi2a	0.952937	1.93581	0.0429386	267.994	138.436	265	140	-	rno:685433	ecotropic viral integration site 2A	9e-106	Evi2a	Protein EVI2A
Srp72	-0.898192	0.536559	0.042955	247.768	461.782	245	467	-	rno:498351	signal recognition particle 72	0	Srp72	Srp72 protein
LOC100911522	4.0188	16.2098	0.0430047	16.1808	0.988826	16	1	-		uncharacterized LOC100911522
Trim14	4.0188	16.2098	0.0430047	16.1808	0.988826	16	1	-	rno:313236	tripartite motif-containing 14	4e-153	Trim14	Tripartite motif-containing 14
Entpd1	4.0188	16.2098	0.0430047	16.1808	0.988826	16	1	+	rno:64519	ectonucleoside triphosphate diphosphohydrolase 1	0	Entpd1	Ectonucleoside triphosphate diphosphohydrolase 1
Aven	1.27793	2.42491	0.0433384	83.9379	34.6089	83	35	+	rno:311299	apoptosis, caspase activation inhibitor	8e-142	Aven	Cell death regulator Aven
Cd4	0.861943	1.81748	0.0434367	1193.33	656.581	1180	664	-	rno:24932	Cd4 molecule	3e-168	Cd4	T4 surface glycoprotein
B3gnt2	1.09941	2.14267	0.0436176	133.492	62.2961	132	63	-	rno:305571	UDP-GlcNAc:betaGal beta-1,3-N-acetylglucosaminyltransferase 2	0	B3gnt2	Protein B3gnt2
Thrb	-1.00385	0.498668	0.0436717	99.1074	198.754	98	201	-	rno:24831	thyroid hormone receptor beta	0	Thrb	Thyroid hormone receptor beta
Dpm3	-2.39823	0.189697	0.0438893	5.0565	26.6983	5	27	+	rno:502017	dolichyl-phosphate mannosyltransferase polypeptide 3	1e-46	Dpm3	Dolichol-phosphate mannosyltransferase subunit 3
LOC102549151	-2.39823	0.189697	0.0438893	5.0565	26.6983	5	27	-		uncharacterized LOC102549151
LOC103693254	-1.89254	0.269333	0.0441013	10.113	37.5754	10	38	+		DNA repair endonuclease XPF-like	1e-158	Ercc4	DNA repair endonuclease XPF
Ticam1	1.20588	2.30678	0.0443888	98.0961	42.5195	97	43	+		toll-like receptor adaptor molecule 1	0	Ticam1	TIR domain-containing adapter molecule 1
Ppp2r5e	-0.861097	0.550534	0.0445721	760.497	1381.39	752	1397	-	rno:299147	protein phosphatase 2, regulatory subunit B', epsilon isoform	0	Ppp2r5e	Ppp2r5e protein
LOC102552166	-1.32719	0.398544	0.0446177	30.339	76.1396	30	77	-		helicase ARIP4-like	0	Rad54l2	Helicase ARIP4
LOC102552327	-1.32719	0.398544	0.0446177	30.339	76.1396	30	77	+		PIH1 domain-containing protein 1-like
Acr	-10.3292	0.000777318	0.0448935	0	12.8547	0	13	+	rno:24163	acrosin	0	Acr	Acrosin
LOC102555329	-10.3292	0.000777318	0.0448935	0	12.8547	0	13	-		uncharacterized LOC102555329
Mdh1b	-10.3292	0.000777318	0.0448935	0	12.8547	0	13	-	rno:316444	malate dehydrogenase 1B, NAD (soluble)	0	Mdh1b	Putative malate dehydrogenase 1B
Mcc	-10.3292	0.000777318	0.0448935	0	12.8547	0	13	-	rno:307449	mutated in colorectal cancers	0	Mcc	Protein Mcc
LOC100909688	-10.3292	0.000777318	0.0448935	0	12.8547	0	13	-		zinc finger protein 43-like	0	Zfp708	Protein Zfp708
Fstl3	-10.3292	0.000777318	0.0448935	0	12.8547	0	13	-	rno:114031	follistatin-like 3 (secreted glycoprotein)	6e-143	Fstl3	Follistatin-like 3
Nkpd1	-10.3292	0.000777318	0.0448935	0	12.8547	0	13	+	rno:680440	NTPase, KAP family P-loop domain containing 1	0	Nkpd1	NTPase KAP family P-loop domain-containing protein 1
Lrrc6	-10.3292	0.000777318	0.0448935	0	12.8547	0	13	-	rno:299920	leucine rich repeat containing 6	0	Lrrc6	Protein tilB homolog
Mir101a	-10.3292	0.000777318	0.0448935	0	12.8547	0	13	-	rno:100314279	microRNA 101a
LOC102554278	-10.3292	0.000777318	0.0448935	0	12.8547	0	13	-		uncharacterized LOC102554278
LOC103691863	-10.3292	0.000777318	0.0448935	0	12.8547	0	13	-		uncharacterized LOC103691863
LOC102546557	-10.3292	0.000777318	0.0448935	0	12.8547	0	13	-		uncharacterized LOC102546557
Mrvi1	-10.3292	0.000777318	0.0448935	0	12.8547	0	13	-	rno:308899	murine retrovirus integration site 1 homolog	0	Mrvi1	Protein MRVI1
Zpbp2	-10.3292	0.000777318	0.0448935	0	12.8547	0	13	+	rno:363676	zona pellucida binding protein 2	1e-133	Zpbp2	Zona pellucida-binding protein 2
LOC103691622	-10.3292	0.000777318	0.0448935	0	12.8547	0	13	+		uncharacterized LOC103691622
Cpne9	-10.3292	0.000777318	0.0448935	0	12.8547	0	13	+	rno:297516	copine family member IX	0	Cpne9	Copine-9
Klhl33	-10.3292	0.000777318	0.0448935	0	12.8547	0	13	-	rno:100362676	kelch-like family member 33	0	Klhl33	MCG16528
Gckr	-10.3292	0.000777318	0.0448935	0	12.8547	0	13	-	rno:25658	glucokinase (hexokinase 4) regulator	0	Gckr	Glucokinase regulatory protein
Mcmdc2	-10.3292	0.000777318	0.0448935	0	12.8547	0	13	-	rno:500392	minichromosome maintenance domain containing 2	0	Mcmdc2	MCM domain-containing protein 2
LOC102549750	-10.3292	0.000777318	0.0448935	0	12.8547	0	13	-		uncharacterized LOC102549750
Myl2	-10.3292	0.000777318	0.0448935	0	12.8547	0	13	-	rno:363925	myosin, light chain 2, regulatory, cardiac, slow	3e-93	Myl2	Myosin regulatory light chain 2, ventricular/cardiac muscle isoform
LOC102549538	-10.3292	0.000777318	0.0448935	0	12.8547	0	13	-		uncharacterized LOC102549538
Mgat4c	-10.3292	0.000777318	0.0448935	0	12.8547	0	13	+	rno:299756	mannosyl (alpha-1,3-)-glycoprotein beta-1,4-N-acetylglucosaminyltransferase, isozyme C	0	Mgat4c	Alpha-1,3-mannosyl-glycoprotein 4-beta-N-acetylglucosaminyltransferase C
LOC102552421	-10.3292	0.000777318	0.0448935	0	12.8547	0	13	-		uncharacterized LOC102552421
Spata25	-10.3292	0.000777318	0.0448935	0	12.8547	0	13	-	rno:499943	spermatogenesis associated 25	8e-110	Spata25	Spermatogenesis-associated protein 25
Vpreb1	-10.3292	0.000777318	0.0448935	0	12.8547	0	13	+	rno:303782	pre-B lymphocyte 1	5e-64	Vpreb1	Immunoglobulin iota chain
Prkcd	0.881983	1.84291	0.044984	552.17	299.614	546	303	-	rno:170538	protein kinase C, delta	0	Prkcd	Protein kinase C delta variant IX
Pcdhb20	-1.10495	0.464917	0.0452946	60.678	130.525	60	132	+	rno:680203	protocadherin beta 20	0	Pcdhb20	Protein Pcdhb20
Kmt2a	-0.864333	0.5493	0.0454131	1464.36	2665.88	1448	2696	-		lysine (K)-specific methyltransferase 2A	0	Kmt2a	Histone-lysine N-methyltransferase 2A
Lrrc48	-1.33812	0.395536	0.0457379	29.3277	74.162	29	75	+	rno:287371	leucine rich repeat containing 48	0	Lrrc48	Leucine-rich repeat-containing protein 48
Setd2	-0.860134	0.550901	0.045942	648.243	1176.7	641	1190	+	rno:316013	SET domain containing 2	0	Setd2	Histone-lysine N-methyltransferase SETD2
LOC102557195	-1.25685	0.418455	0.0460631	36.4068	87.0167	36	88	+		uncharacterized LOC102557195
Zfp483	-1.25685	0.418455	0.0460631	36.4068	87.0167	36	88	+	rno:170955	zinc finger protein 483	0	Zkscan16	Protein Zkscan16
Fam180a	-2.83796	0.139858	0.0460778	3.0339	21.7542	3	22	-	rno:362336	family with sequence similarity 180, member A	4e-77	Fam180a	Protein FAM180A
Gper1	1.58824	3.00683	0.0461574	50.565	16.81	50	17	-	rno:171104	G protein-coupled estrogen receptor 1	0	Gper1	G-protein coupled estrogen receptor 1
Tgm2	1.15659	2.2293	0.0461807	110.232	49.4413	109	50	-	rno:56083	transglutaminase 2	0	Tgm2	Protein-glutamine gamma-glutamyltransferase 2
Dbx2	1.03233	2.04533	0.0465504	167.876	82.0726	166	83	-	rno:541457	developing brain homeobox 2	0	Dbx2	Protein Dbx2
Zfp322a	-1.68308	0.311416	0.0467988	14.1582	45.486	14	46	+	rno:680201	zinc finger protein 322a	0	Zfp322a	Zinc finger protein 322
Daam1	-0.860912	0.550604	0.0470022	1326.83	2409.77	1312	2437	+	rno:314212	dishevelled associated activator of morphogenesis 1	0	Daam2	Disheveled-associated activator of morphogenesis 2
Pxdc1	0.927493	1.90197	0.047042	308.446	162.168	305	164	+	rno:361238	PX domain containing 1
Cacng3	1.29155	2.4479	0.0471937	79.8927	32.6313	79	33	+	rno:140724	calcium channel, voltage-dependent, gamma subunit 3	0	Cacng3	Voltage-dependent calcium channel gamma-3 subunit
Gpcpd1	-0.934148	0.523351	0.0472328	154.729	295.659	153	299	-	rno:362219	glycerophosphocholine phosphodiesterase GDE1 homolog (S. cerevisiae)	0	Gpcpd1	Glycerophosphocholine phosphodiesterase GPCPD1
Col14a1	-1.10947	0.463466	0.047582	58.6554	126.57	58	128	+	rno:314981	collagen, type XIV, alpha 1	0	Col14a1	Procollagen, type XIV, alpha 1, isoform CRA_a
Scarf1	1.61677	3.06688	0.0476135	48.5424	15.8212	48	16	+	rno:303313	scavenger receptor class F, member 1	0	Scarf1	Scavenger receptor class F member 1
LOC100912604	1.61677	3.06688	0.0476135	48.5424	15.8212	48	16	+		spermidine synthase-like
Mir6315	0.916242	1.88719	0.0476997	337.774	178.978	334	181	-		microRNA mir-6315
Tmem104	0.858312	1.81292	0.0479477	969.837	534.955	959	541	+	rno:303670	transmembrane protein 104	0	Tmem104	Transmembrane protein 104
Tbc1d2	1.15901	2.23305	0.048046	108.209	48.4525	107	49	-	rno:313234	TBC1 domain family, member 2	0	Tbc1d2	TBC1 domain family member 2A
Galk1	0.855878	1.80986	0.0480785	1981.14	1094.63	1959	1107	-	rno:287835	galactokinase 1	0	Galk1	Galactokinase 1
Pdik1l	-1.02708	0.490702	0.0481367	83.9379	171.067	83	173	-	rno:313609	PDLIM1 interacting kinase 1 like	4e-52	Pdik1l	Serine/threonine-protein kinase PDIK1L
Lck	0.969351	1.95796	0.0482465	226.531	115.693	224	117	-	rno:313050	LCK proto-oncogene, Src family tyrosine kinase	0	Hck	Non-specific protein-tyrosine kinase
Rsg1	-1.37533	0.385466	0.0492459	26.2938	68.229	26	69	+	rno:500576	REM2 and RAB-like small GTPase 1
Adam22	-0.886089	0.541079	0.0493008	257.881	476.614	255	482	+	rno:57033	ADAM metallopeptidase domain 22	0	Adam22	Adam22 protein
Lamb1	-0.904568	0.534193	0.0493792	201.249	376.743	199	381	+		laminin, beta 1	0	Lamb1	Laminin B1 subunit 1
Sec63	-0.854224	0.553163	0.0497119	769.599	1391.28	761	1407	+	rno:309858	SEC63 homolog (S. cerevisiae)	0	Sec63	Sec63 protein
Tmem74	-0.974058	0.509072	0.0502263	111.243	218.531	110	221	-	rno:500864	transmembrane protein 74	7e-35	Tmem74b	Protein Tmem74b
Zfp618	-0.88509	0.541454	0.0505707	254.848	470.681	252	476	+	rno:313253	zinc finger protein 618	0	Zfp618	Zinc finger protein 618
Fam64a	0.898677	1.86436	0.0508037	385.305	206.665	381	209	+	rno:360559	family with sequence similarity 64, member A	6e-120	Fam64a	Protein FAM64A
Mafa	2.8356	7.1384	0.0512328	21.2373	2.96648	21	3	-	rno:366949	v-maf avian musculoaponeurotic fibrosarcoma oncogene A	8e-121	Mafa	Transcription factor MafA
Glt8d1	-0.932767	0.523853	0.051291	148.661	283.793	147	287	+	rno:306253	glycosyltransferase 8 domain containing 1	0	Glt8d1	Glycosyltransferase 8 domain-containing protein 1
Mrpl35	0.898003	1.86349	0.0515803	383.283	205.676	379	208	-	rno:297334	mitochondrial ribosomal protein L35	2e-98	Mrpl35	39S ribosomal protein L35, mitochondrial
RGD1310712	-0.855019	0.552858	0.0515914	539.023	974.983	533	986	-		similar to EMSY protein	0	2210018M11Rik	Putative uncharacterized protein
Pi16	0.860475	1.81564	0.0517025	727.125	400.475	719	405	+	rno:294312	peptidase inhibitor 16	2e-109	Pi16	Peptidase inhibitor 16
Abce1	-0.851996	0.554018	0.0523209	637.119	1150.01	630	1163	+	rno:361390	ATP-binding cassette, subfamily E (OABP), member 1	0	Abce1	ATP-binding cassette sub-family E member 1
Pik3ap1	0.910511	1.87971	0.0524513	332.718	177	329	179	-	rno:294048	phosphoinositide-3-kinase adaptor protein 1	0	Pik3ap1	Phosphoinositide 3-kinase adapter protein 1
Grip1	-0.85352	0.553433	0.0524846	552.17	997.726	546	1009	+	rno:84016	glutamate receptor interacting protein 1	0	Grip1	Glutamate receptor-interacting protein 1
Cdca5	1.00098	2.00136	0.0524955	184.057	91.9609	182	93	+	rno:684771	cell division cycle associated 5	2e-102	Cdca5	Sororin
Prkcq	0.962896	1.94922	0.0525104	225.52	115.693	223	117	-	rno:85420	protein kinase C, theta	0	Prkcq	Protein kinase C theta type
Lfng	0.848998	1.80125	0.0526654	1387.5	770.296	1372	779	-	rno:170905	LFNG O-fucosylpeptide 3-beta-N-acetylglucosaminyltransferase	0	Lfng	Beta-1,3-N-acetylglucosaminyltransferase lunatic fringe
Creb1	-0.918325	0.529123	0.0528023	165.853	313.458	164	317	+	rno:81646	cAMP responsive element binding protein 1	0	Creb1	Cyclic AMP-responsive element-binding protein 1
Slc7a14	-1.42091	0.373477	0.0528973	23.2599	62.2961	23	63	+	rno:499587	solute carrier family 7, member 14	0	Slc7a14	Probable cationic amino acid transporter
Cldn19	-1.07599	0.474347	0.0529328	64.7232	136.458	64	138	+	rno:298487	claudin 19	5e-119	Cldn19	Claudin-19
LOC680656	0.886542	1.84874	0.0532472	427.78	231.385	423	234	+	rno:680656	hypothetical protein LOC680656	3e-112	B930041F14Rik	Putative uncharacterized protein
Rhpn2	-0.981585	0.506423	0.0533047	103.153	203.698	102	206	+	rno:308516	rhophilin, Rho GTPase binding protein 2	1e-148	Rhpn1	Rhophilin-1
Angpt2	1.94876	3.86042	0.0533369	34.3842	8.89944	34	9	+	rno:89805	angiopoietin 2	0	Angpt2	Angiopoietin 2
Vcan	-0.849778	0.55487	0.0537113	683.639	1232.08	676	1246	-	rno:114122	versican	0	Vcan	Versican core protein
Crebrf	-0.955448	0.515681	0.0540117	121.356	235.341	120	238	-	rno:303016	CREB3 regulatory factor	0	Crebrf	CREB3 regulatory factor
Ccdc18	-3.20916	0.10813	0.0542994	2.0226	18.7877	2	19	-	rno:305628	coiled-coil domain containing 18	0	Ccdc18	Coiled-coil domain-containing protein 18
LOC103692220	-0.967515	0.511386	0.0546571	111.243	217.542	110	220	-		uncharacterized LOC103692220
Rps6	0.860729	1.81596	0.0547626	648.243	356.966	641	361	-	rno:29304	ribosomal protein S6	1e-142	Rps6	40S ribosomal protein S6
Marveld1	0.987493	1.98274	0.0553189	192.147	96.905	190	98	+	rno:309375	MARVEL domain containing 1
Rac2	0.846964	1.79871	0.0553995	1931.58	1073.87	1910	1086	-	rno:366957	ras-related C3 botulinum toxin substrate 2 (rho family, small GTP binding protein Rac2)	2e-111	Rac2	Ras-related C3 botulinum toxin substrate 2
Zdhhc2	-1.06125	0.479217	0.0554828	67.7571	141.402	67	143	-	rno:246326	zinc finger, DHHC-type containing 2	0	Zdhhc2	Palmitoyltransferase ZDHHC2
Mapk12	1.51192	2.85189	0.0557207	53.5989	18.7877	53	19	-	rno:60352	mitogen-activated protein kinase 12	0	Mapk12	Mitogen-activated protein kinase 12
St14	0.887656	1.85017	0.0559691	402.497	217.542	398	220	-	rno:114093	suppression of tumorigenicity 14 (colon carcinoma)	0	St14	Suppressor of tumorigenicity 14 protein homolog
Dgkz	0.865046	1.8214	0.0560194	5532.82	3037.67	5471	3072	-	rno:81821	diacylglycerol kinase zeta	0	Dgkz	Diacylglycerol kinase zeta
Plcl2	-0.866835	0.548349	0.0564164	307.435	560.665	304	567	-	rno:301173	phospholipase C-like 2	0	Plcl2	Inactive phospholipase C-like protein 2
Ccpg1	-0.849154	0.55511	0.0564291	539.023	971.028	533	982	+	rno:363098	cell cycle progression 1	0	Ccpg1	Cell cycle progression protein 1
LOC100359616	-2.54959	0.170804	0.0565831	4.0452	23.7318	4	24	-	rno:100359616	ribosomal protein L36-like
Khdrbs2	-0.910612	0.531959	0.0566632	169.898	319.391	168	323	-	rno:170843	KH domain containing, RNA binding, signal transduction associated 2	2e-16	Sf1	Splicing factor 1
Ptpn18	1.07739	2.11021	0.0566879	131.469	62.2961	130	63	+	rno:301333	protein tyrosine phosphatase, non-receptor type 18	0	Ptpn18	Tyrosine-protein phosphatase non-receptor type 18
Jazf1	-0.905077	0.534004	0.0569071	179	335.212	177	339	-	rno:685879	JAZF zinc finger 1	6e-145	Jazf1	Juxtaposed with another zinc finger protein 1
Slc4a4	-0.949525	0.517803	0.0574377	122.367	236.33	121	239	-	rno:84484	solute carrier family 4, sodium bicarbonate cotransporter, member 4	0	Slc4a4	Slc4a4 protein
Rab43	1.04217	2.05932	0.0574418	148.661	72.1843	147	73	-	rno:500249	RAB43, member RAS oncogene family	3e-63	Rab19	Ras-related protein Rab-19
Ggn	1.04217	2.05932	0.0574418	148.661	72.1843	147	73	+	rno:292765	gametogenetin	0	Ggn	MCG51479, isoform CRA_b
LOC685935	-3.95429	0.0645117	0.0574833	1.0113	15.8212	1	16	-		similar to splicing factor, arginine/serine-rich 10 (transformer 2 homolog, Drosophila)
LOC684529	-3.95429	0.0645117	0.0574833	1.0113	15.8212	1	16	+	rno:684529	similar to cathepsin O	4e-143	Ctso	Cathepsin O
Rhbdl3	0.860586	1.81578	0.0575476	599.701	330.268	593	334	+	rno:287556	rhomboid, veinlet-like 3 (Drosophila)	3e-106	Rhbdl1	Putative uncharacterized protein
Nanp	-1.20004	0.435264	0.057932	40.452	92.9497	40	94	-	rno:311530	N-acetylneuraminic acid phosphatase	3e-144	Nanp	N-acylneuraminate-9-phosphatase
Fbxo4	1.53439	2.89666	0.0579635	51.5763	17.7989	51	18	-	rno:310363	F-box protein 4	0	Fbxo4	F-box only protein 4
Psd3	-0.949374	0.517857	0.0584329	121.356	234.352	120	237	+	rno:306380	pleckstrin and Sec7 domain containing 3	0	Psd3	PH and SEC7 domain-containing protein 3
LOC102546421	-1.08293	0.472069	0.058659	60.678	128.547	60	130	+		uncharacterized LOC102546421
Epha8	1.0781	2.11126	0.0588427	129.446	61.3072	128	62	-	rno:60589	Eph receptor A8	0	Epha8	Ephrin type-A receptor 8
LOC102547955	-0.944064	0.519767	0.0589653	125.401	241.274	124	244	+		uncharacterized LOC102547955
Erf	0.841685	1.79214	0.0590898	1524.03	850.391	1507	860	-	rno:292721	Ets2 repressor factor	0	Erf	ETS domain-containing transcription factor ERF
Zfp663	-0.892388	0.538722	0.0591989	199.226	369.821	197	374	-	rno:100362089	zinc finger protein 663	0	Zfp663	Protein Zfp663
Metrn	0.842356	1.79298	0.0593912	1127.6	628.894	1115	636	-	rno:287151	meteorin, glial cell differentiation regulator	3e-54	Metrnl	Meteorin-like protein
Gins3	-1.04877	0.483379	0.0594018	69.7797	144.369	69	146	-	rno:307639	GINS complex subunit 3 (Psf3 homolog)	9e-122	Gins3	DNA replication complex GINS protein PSF3
P2rx7	1.0423	2.05951	0.0594584	146.638	71.1955	145	72	-	rno:29665	purinergic receptor P2X, ligand-gated ion channel, 7	0	P2rx7	P2X purinoceptor 7
Luc7l2	-0.847945	0.555576	0.0597744	470.254	846.435	465	856	+	rno:312251	LUC7-like 2 (S. cerevisiae)	0	Luc7l2	Putative RNA-binding protein Luc7-like 2
Xkr5	1.28008	2.42853	0.0599079	76.8588	31.6424	76	32	+	rno:497083	XK, Kell blood group complex subunit-related family, member 5	1e-69	Xkr5	XK-related protein 5
RGD1566369	-0.967512	0.511387	0.0600002	106.186	207.654	105	210	-	rno:291353	similar to ribosomal protein S8
Ulk3	-1.08481	0.471455	0.0602451	59.6667	126.57	59	128	+	rno:691171	unc-51 like kinase 3	1e-49	Ulk1	Serine/threonine-protein kinase ULK1
Zfp418	2.55296	5.86837	0.0603094	23.2599	3.95531	23	4	+	rno:292548	zinc finger protein 418	0	Zfp418	Zinc finger protein 418
Trps1	-1.16618	0.4456	0.0603673	44.4972	99.8715	44	101	-	rno:299897	trichorhinophalangeal syndrome I	0	Trps1	Trichorhinophalangeal syndrome I (Human), isoform CRA_b
Fhdc1	-0.938842	0.521651	0.0604735	128.435	246.218	127	249	-	rno:295161	FH2 domain containing 1	0	Fhdc1	Fhdc1 protein
Duox1	-1.85407	0.27661	0.0605601	10.113	36.5866	10	37	+	rno:266807	dual oxidase 1	0	Duox1	Protein Duox1
Popdc2	-1.58169	0.334089	0.0605652	16.1808	48.4525	16	49	-	rno:360718	popeye domain containing 2	0	Popdc2	Popdc2 protein
Macrod2	-1.58169	0.334089	0.0605652	16.1808	48.4525	16	49	+	rno:685695	MACRO domain containing 2	3e-79	Macrod2	O-acetyl-ADP-ribose deacetylase MACROD2
Zfpm1	0.861288	1.81666	0.0607477	546.102	300.603	540	304	+		zinc finger protein, multitype 1	0	Zfpm1	Zinc finger protein ZFPM1
Tle4	-0.848439	0.555385	0.0611073	433.848	781.173	429	790	-	rno:25565	transducin-like enhancer of split 4	0	Tle4	Transducin-like enhancer protein 4
Plcb4	-1.02263	0.49222	0.0611918	77.8701	158.212	77	160	+	rno:25031	phospholipase C, beta 4	0	Plcb4	Phosphoinositide phospholipase C
Vegfa	-0.846589	0.556098	0.0612156	465.198	836.547	460	846	+	rno:83785	vascular endothelial growth factor A	0	Vegfa	Vascular endothelial growth factor A isoform 5
Cd63	0.865122	1.82149	0.0612201	6793.91	3729.85	6718	3772	+	rno:29186	Cd63 molecule	3e-132	Cd63	CD63 antigen
Dqx1	-1.65138	0.318335	0.0617896	14.1582	44.4972	14	45	+	rno:680434	DEAQ box RNA-dependent ATPase 1	0	Dqx1	ATP-dependent RNA helicase DQX1
Prkg2	-1.65138	0.318335	0.0617896	14.1582	44.4972	14	45	+	rno:25523	protein kinase, cGMP-dependent, type II	0	Prkg2	cGMP-dependent protein kinase
Ccdc13	-1.69265	0.309359	0.0620472	13.1469	42.5195	13	43	-	rno:686091	coiled-coil domain containing 13	0	Ccdc13	Coiled-coil domain-containing protein 13
Flrt3	-0.921402	0.527996	0.0623164	144.616	273.905	143	277	-	rno:366205	fibronectin leucine rich transmembrane protein 3	0	Flrt3	Fibronectin leucine rich transmembrane protein 3, isoform CRA_b
Ebf1	-1.13734	0.454597	0.0623751	48.5424	106.793	48	108	+	rno:116543	early B-cell factor 1	0	Ebf3	Transcription factor COE3
Casq1	-1.36777	0.387491	0.0624029	25.2825	65.2625	25	66	-	rno:686019	calsequestrin 1 (fast-twitch, skeletal muscle)	0	Casq1	Calsequestrin-1
Chordc1	-1.02334	0.491977	0.0626654	76.8588	156.235	76	158	+	rno:315447	cysteine and histidine-rich domain (CHORD)-containing 1	0	Chordc1	Cysteine and histidine-rich domain-containing protein 1
Itih4	10.2462	1214.56	0.0634569	12.1356	0	12	0	+	rno:54404	inter-alpha-trypsin inhibitor heavy chain family, member 4	0	Itih4	Inter alpha-trypsin inhibitor, heavy chain 4
Cyp2j4	10.2462	1214.56	0.0634569	12.1356	0	12	0	-	rno:65210	cytochrome P450, family 2, subfamily j, polypeptide 4	0	Cyp2j6	Cytochrome P450 2J6
LOC102555260	10.2462	1214.56	0.0634569	12.1356	0	12	0	+		HAUS augmin-like complex subunit 6-like
Ttc30a	10.2462	1214.56	0.0634569	12.1356	0	12	0	-	rno:100362431	tetratricopeptide repeat domain 30A	0	Ttc30a1	Tetratricopeptide repeat protein 30A1
Tmem116	10.2462	1214.56	0.0634569	12.1356	0	12	0	-	rno:690442	transmembrane protein 116	1e-134	Tmem116	Protein Tmem116
LOC100359776	10.2462	1214.56	0.0634569	12.1356	0	12	0	-		hypothetical LOC100359776
LOC500028	10.2462	1214.56	0.0634569	12.1356	0	12	0	-	rno:500028	hypothetical protein LOC500028	2e-102	Yae1d1	1600012F09Rik protein
LOC102551208	10.2462	1214.56	0.0634569	12.1356	0	12	0	+		tctex1 domain-containing protein 4-like	3e-114	Tctex1d4	Tctex1 domain-containing protein 4
Dio2	10.2462	1214.56	0.0634569	12.1356	0	12	0	-	rno:65162	deiodinase, iodothyronine, type II	2e-38	Dio3	Type III iodothyronine deiodinase
LOC103691054	10.2462	1214.56	0.0634569	12.1356	0	12	0	+		uncharacterized LOC103691054
LOC102548902	10.2462	1214.56	0.0634569	12.1356	0	12	0	+		uncharacterized LOC102548902
LOC103691493	10.2462	1214.56	0.0634569	12.1356	0	12	0	-		legumain pseudogene
LOC103693132	10.2462	1214.56	0.0634569	12.1356	0	12	0	+		transcription initiation factor IIA subunit 2 pseudogene
Ptplad2	10.2462	1214.56	0.0634569	12.1356	0	12	0	-	rno:362540	protein tyrosine phosphatase-like A domain containing 2	4e-110	Ptplad2	Very-long-chain (3R)-3-hydroxyacyl-CoA dehydratase 4
Clic2	10.2462	1214.56	0.0634569	12.1356	0	12	0	+	rno:294141	chloride intracellular channel 2	1e-94	Clic6	Chloride intracellular channel protein 6
RGD1560281	10.2462	1214.56	0.0634569	12.1356	0	12	0	+	rno:288549	similar to cell surface receptor FDFACT	9e-87	Pilrb2	Paired immunoglobulin-like type 2 receptor beta-2
RGD1564956	10.2462	1214.56	0.0634569	12.1356	0	12	0	-	rno:500462	similar to calcium binding protein P22
LOC102550100	10.2462	1214.56	0.0634569	12.1356	0	12	0	-		uncharacterized LOC102550100
LOC102552331	10.2462	1214.56	0.0634569	12.1356	0	12	0	+		uncharacterized LOC102552331
Atl1	-0.849684	0.554906	0.0636311	380.249	685.257	376	693	+	rno:362750	atlastin GTPase 1	0	Atl1	Atl1 protein
Pax6	-0.847581	0.555716	0.0636538	405.531	729.754	401	738	+	rno:25509	paired box 6	0	Pax6	Paired box protein Pax-6
Wnt3	-1.38225	0.38362	0.0641594	24.2712	63.2849	24	64	+	rno:24882	wingless-type MMTV integration site family, member 3	0	Wnt3	Protein Wnt
Slc12a8	3.19586	9.16327	0.0642982	18.2034	1.97765	18	2	-	rno:266733	solute carrier family 12, member 8	0	Slc12a8	Solute carrier family 12 member 8
Otos	3.19586	9.16327	0.0642982	18.2034	1.97765	18	2	-	rno:246044	otospiralin	4e-45	Otos	Otospiralin
Esyt1	0.860574	1.81576	0.0644078	511.718	281.816	506	285	-	rno:29579	extended synaptotagmin-like protein 1	0	Esyt1	Extended synaptotagmin-1
Trim25	1.0228	2.03186	0.0652289	152.706	75.1508	151	76	+	rno:494338	tripartite motif-containing 25	3e-38	4933422H20Rik	Protein 4933422H20Rik
Fbxl5	-0.862686	0.549928	0.0652821	274.062	498.369	271	504	+	rno:305424	F-box and leucine-rich repeat protein 5	0	Fbxl5	F-box/LRR-repeat protein 5
Invs	-1.09083	0.469493	0.0654302	56.6328	120.637	56	122	+	rno:313228	inversin	0	Invs	Invs protein
Arpp21	-0.836423	0.56003	0.0657622	709.932	1267.68	702	1282	-	rno:363153	cAMP-regulated phosphoprotein 21	0	Arpp21	cAMP-regulated phosphoprotein 21
Gls2	-1.11518	0.461633	0.065924	51.5763	111.737	51	113	+	rno:192268	glutaminase 2 (liver, mitochondrial)	0	Gls	Glutaminase kidney isoform, mitochondrial
Grm5	-0.983268	0.505832	0.0666759	92.0283	181.944	91	184	+	rno:24418	glutamate receptor, metabotropic 5	0	Grm5	Metabotropic glutamate receptor subtype 5b
RGD1304963	2.35201	5.10533	0.0667417	25.2825	4.94413	25	5	+	rno:313891	similar to hypothetical protein MGC38716	0	BC027072	Uncharacterized protein C2orf71 homolog
LOC362473	2.35201	5.10533	0.0667417	25.2825	4.94413	25	5	+		similar to Elongation factor 1-gamma (EF-1-gamma) (eEF-1B gamma)
Rpp30	-0.866965	0.548299	0.0670053	247.768	451.894	245	457	+	rno:685332	ribonuclease P/MRP 30 subunit	2e-151	Rpp30	Ribonuclease P protein subunit p30
Nr1d2	-0.932477	0.523958	0.0674291	126.412	241.274	125	244	+	rno:259241	nuclear receptor subfamily 1, group D, member 2	0	Nr1d2	Nuclear receptor subfamily 1, group D, member 2, isoform CRA_b
Vat1	0.8689	1.82627	0.0676422	9614.43	5264.51	9507	5324	-	rno:287721	vesicle amine transport 1	0	Vat1	Putative uncharacterized protein
Nt5dc1	-1.41463	0.375105	0.0677596	22.2486	59.3296	22	60	-	rno:294456	5'-nucleotidase domain containing 1	0	Nt5dc1	5'-nucleotidase domain-containing protein 1
Fyttd1	-0.89715	0.536946	0.0678183	169.898	316.424	168	320	-	rno:360726	forty-two-three domain containing 1	3e-119	Fyttd1	UAP56-interacting factor
Fhit	1.36549	2.57663	0.0679988	63.7119	24.7207	63	25	+	rno:60398	fragile histidine triad	2e-75	Fhit	Bis(5'-adenosyl)-triphosphatase
RGD1564574	1.46492	2.76047	0.0683599	54.6102	19.7765	54	20	+		similar to 40S ribosomal protein S16
Alg6	1.68876	3.22379	0.0691397	41.4633	12.8547	41	13	+	rno:362547	ALG6, alpha-1,3-glucosyltransferase	3e-143	Alg6	Dolichyl pyrophosphate Man9GlcNAc2 alpha-1,3-glucosyltransferase
Pygo1	-1.09519	0.468073	0.0692831	54.6102	116.682	54	118	+	rno:691857	pygopus family PHD finger 1	0	Pygo1	Pygopus 1
Slc35c2	0.834039	1.78267	0.0693262	953.656	534.955	943	541	-	rno:311637	solute carrier family 35 (GDP-fucose transporter), member C2	2e-154	Slc35c2	Solute carrier family 35 member C2
Ankib1	-0.847924	0.555583	0.0696925	336.763	606.151	333	613	+	rno:368062	ankyrin repeat and IBR domain containing 1	0	Ankib1	Ankib1 protein
Clic1	0.834267	1.78295	0.0700418	2314.87	1298.33	2289	1313	+	rno:406864	chloride intracellular channel 1	1e-87	Clic5	Chloride intracellular channel protein 5
Phc3	-0.834565	0.560752	0.0703344	533.966	952.24	528	963	+	rno:310258	polyhomeotic homolog 3 (Drosophila)	0	Phc3	Phc3 protein
Dzank1	-1.07525	0.474588	0.070424	58.6554	123.603	58	125	-		double zinc ribbon and ankyrin repeat domains 1	0	Dzank1	6330439K17Rik protein
Tmtc3	-1.07525	0.474588	0.070424	58.6554	123.603	58	125	-	rno:314785	transmembrane and tetratricopeptide repeat containing 3	0	Tmtc3	Transmembrane and TPR repeat-containing protein 3
Csnk1g1	-0.967507	0.511389	0.0705059	98.0961	191.832	97	194	+	rno:64086	casein kinase 1, gamma 1	0	Csnk1g1	Casein kinase I isoform gamma-1
Taf7	-0.871333	0.546641	0.0708964	219.452	401.464	217	406	-	rno:307485	TAF7 RNA polymerase II, TATA box binding protein (TBP)-associated factor	0	Taf7	Putative uncharacterized protein
LOC102555997	2.20045	4.59621	0.0709671	27.3051	5.93296	27	6	-		uncharacterized LOC102555997
Ager	-1.45255	0.365374	0.071411	20.226	55.3743	20	56	+	rno:81722	advanced glycosylation end product-specific receptor	1e-15	Alcam	CD166 antigen
Trim23	-0.907412	0.533141	0.071609	148.661	278.849	147	282	+	rno:81002	tripartite motif-containing 23	0	Trim23	E3 ubiquitin-protein ligase TRIM23
Tspan31	0.829616	1.77721	0.0717973	1145.8	644.715	1133	652	-	rno:362890	tetraspanin 31	2e-111	Tspan31	Tetraspanin-31
Plxna4a	-0.829775	0.562617	0.0725511	749.373	1331.95	741	1347	-		plexin A4, A	0	Plxna4	Plexin A4
Col22a1	-1.19517	0.436734	0.0726619	38.4294	88.0056	38	89	-	rno:315071	collagen, type XXII, alpha 1	0	Col22a1	Protein Col22a1
LOC100911093	1.7815	3.43784	0.0727081	37.4181	10.8771	37	11	+		CCA tRNA nucleotidyltransferase 1, mitochondrial-like
Bace2	1.7815	3.43784	0.0727081	37.4181	10.8771	37	11	+	rno:288227	beta-site APP-cleaving enzyme 2	0	Bace2	Beta-secretase 2
Chst14	1.05502	2.07775	0.0732028	129.446	62.2961	128	63	+	rno:691394	carbohydrate (N-acetylgalactosamine 4-0) sulfotransferase 14	0	Chst14	Carbohydrate sulfotransferase 14
Dpep2	3.92575	15.1973	0.0733813	15.1695	0.988826	15	1	-	rno:291984	dipeptidase 2	0	Dpep2	Dipeptidase 2
LOC102550397	3.92575	15.1973	0.0733813	15.1695	0.988826	15	1	+		zinc finger protein 709-like	0	Gm10324	Protein Gm10324
Usp34	-0.829407	0.562761	0.0734084	664.424	1180.66	657	1194	+	rno:360990	ubiquitin specific peptidase 34	0	Usp34	Ubiquitin carboxyl-terminal hydrolase 34
Papolg	-0.897376	0.536862	0.0734832	159.785	297.637	158	301	-	rno:305586	poly(A) polymerase gamma	0	Papola	Poly(A) polymerase alpha
Cep170	-0.828631	0.563063	0.0742559	914.215	1623.65	904	1642	-	rno:171457	centrosomal protein 170	0	Cep170	Centrosomal protein of 170 kDa
Smarcal1	0.872545	1.83089	0.074324	371.147	202.709	367	205	+	rno:316477	Swi/SNF related matrix associated, actin dependent regulator of chromatin, subfamily a-like 1	0	Smarcal1	SWI/SNF-related matrix-associated actin-dependent regulator of chromatin subfamily A-like protein 1
Usp38	-0.846252	0.556228	0.0745443	313.503	563.631	310	570	+		ubiquitin specific peptidase 38	0	Usp38	Ubiquitin carboxyl-terminal hydrolase 38
Ccl6	-1.13035	0.456805	0.0767441	46.5198	101.849	46	103	-	rno:287910	chemokine (C-C motif) ligand 6	1e-49	Ccl6	C-C motif chemokine 6
Zfp36	0.887992	1.8506	0.0771491	307.435	166.123	304	168	+	rno:79426	zinc finger protein 36	2e-136	Zfp36	Tristetraprolin
Parp12	0.931079	1.9067	0.0773257	222.486	116.682	220	118	-		poly (ADP-ribose) polymerase family, member 12	0	Parp12	Putative uncharacterized protein
Zfp536	-0.831539	0.56193	0.0774251	443.961	790.072	439	799	-	rno:292820	zinc finger protein 536	0	Zfp536	Zinc finger protein 536
Vps13c	-0.878108	0.544081	0.0781445	185.068	340.156	183	344	+		vacuolar protein sorting 13 homolog C (S. cerevisiae)
Six3	-1.04546	0.484489	0.0783481	63.7119	131.514	63	133	+	rno:78974	SIX homeobox 3	1e-163	Six3	Homeobox protein SIX3
Aldh6a1	-0.842879	0.55753	0.0784242	311.48	558.687	308	565	-	rno:81708	aldehyde dehydrogenase 6 family, member A1	0	Aldh6a1	Aldh6a1 protein
Trove2	-0.967503	0.51139	0.0786341	93.0396	181.944	92	184	-	rno:304833	TROVE domain family, member 2	0	Trove2	60 kDa SS-A/Ro ribonucleoprotein
Rasd2	1.00394	2.00548	0.0786659	152.706	76.1396	151	77	+	rno:171099	RASD family, member 2	3e-159	Rasd2	GTP-binding protein Rhes
Tcaim	-0.959973	0.514067	0.0788024	97.0848	188.866	96	191	+	rno:363169	T cell activation inhibitor, mitochondrial	0	Tcaim	Protein Tcaim
Efhd1	-1.13376	0.455725	0.0792276	45.5085	99.8715	45	101	+	rno:501181	EF-hand domain family, member D1	4e-71	Efhd2	Efhd2 protein
Tmem161b	-1.26986	0.414699	0.0793983	30.339	73.1732	30	74	+	rno:309953	transmembrane protein 161B	0	Tmem161b	Transmembrane protein 161B
Igsf11	-0.843351	0.557348	0.0797798	300.356	538.91	297	545	-	rno:303926	immunoglobulin superfamily, member 11	0	Igsf11	Immunoglobulin superfamily member 11
Amh	-10.2138	0.00084204	0.0800685	0	11.8659	0	12	-	rno:25378	anti-Mullerian hormone	0	Amh	Amh protein
Tmem52	-10.2138	0.00084204	0.0800685	0	11.8659	0	12	+	rno:100362283	transmembrane protein 52	1e-84	Tmem52	Transmembrane protein 52
LOC102557111	-10.2138	0.00084204	0.0800685	0	11.8659	0	12	+		WAS/WASL-interacting protein family member 3-like
Trpm1	-10.2138	0.00084204	0.0800685	0	11.8659	0	12	+	rno:361586	transient receptor potential cation channel, subfamily M, member 1	0	Trpm1	Transient receptor potential cation channel subfamily M member 1
Trpm8	-10.2138	0.00084204	0.0800685	0	11.8659	0	12	+	rno:171384	transient receptor potential cation channel, subfamily M, member 8	0	Trpm8	Transient receptor potential cation channel subfamily M member 8
Trpv1	-10.2138	0.00084204	0.0800685	0	11.8659	0	12	+	rno:83810	transient receptor potential cation channel, subfamily V, member 1	0	Trpv4	Transient receptor potential cation channel subfamily V member 4
Tdh	-10.2138	0.00084204	0.0800685	0	11.8659	0	12	-	rno:290315	L-threonine dehydrogenase	0	Tdh	L-threonine 3-dehydrogenase, mitochondrial
Bbox1	-10.2138	0.00084204	0.0800685	0	11.8659	0	12	-	rno:64564	butyrobetaine (gamma), 2-oxoglutarate dioxygenase (gamma-butyrobetaine hydroxylase) 1	0	Bbox1	Gamma-butyrobetaine dioxygenase
LOC102553465	-10.2138	0.00084204	0.0800685	0	11.8659	0	12	-		uncharacterized LOC102553465
Ankrd35	-10.2138	0.00084204	0.0800685	0	11.8659	0	12	+	rno:365881	ankyrin repeat domain 35	0	Ankrd35	Ankyrin repeat domain 35
Clec14a	-10.2138	0.00084204	0.0800685	0	11.8659	0	12	-	rno:314148	C-type lectin domain family 14, member A	0	Clec14a	C-type lectin domain family 14 member A
Mir138-2	-10.2138	0.00084204	0.0800685	0	11.8659	0	12	-	rno:100314032	microRNA 138-2
LOC100912066	-10.2138	0.00084204	0.0800685	0	11.8659	0	12	-		uncharacterized LOC100912066
Kcnk7	-10.2138	0.00084204	0.0800685	0	11.8659	0	12	+	rno:499303	potassium channel, subfamily K, member 7	2e-52	Kcnk1	Potassium channel subfamily K member 1
Gpr133	-10.2138	0.00084204	0.0800685	0	11.8659	0	12	-	rno:689257	G protein-coupled receptor 133	0	Gpr133	Gpr133 protein
Sycp2l	-10.2138	0.00084204	0.0800685	0	11.8659	0	12	-	rno:364688	synaptonemal complex protein 2-like	1e-149	Sycp2l	Protein Sycp2l
LOC102556495	-10.2138	0.00084204	0.0800685	0	11.8659	0	12	-		uncharacterized LOC102556495
Tfap2b	-10.2138	0.00084204	0.0800685	0	11.8659	0	12	+	rno:301285	transcription factor AP-2 beta	0	Tfap2b	Transcription factor AP-2-beta
Atp6ap1l	-10.2138	0.00084204	0.0800685	0	11.8659	0	12	-	rno:361875	ATPase, H+ transporting, lysosomal accessory protein 1-like	6e-108	Atp6ap1l	Protein Atp6ap1l
LOC103693972	-10.2138	0.00084204	0.0800685	0	11.8659	0	12	-		low-density lipoprotein receptor-related protein 1-like	0	Gm19410	predicted gene, 19410
Adamts19	-10.2138	0.00084204	0.0800685	0	11.8659	0	12	+	rno:361332	ADAM metallopeptidase with thrombospondin type 1 motif, 19	0	Adamts19	A disintegrin-like and metallopeptidase (Reprolysin type) with thrombospondin type 1 motif, 19
Smad9	-10.2138	0.00084204	0.0800685	0	11.8659	0	12	+	rno:85435	SMAD family member 9	0	Smad9	Mothers against decapentaplegic homolog 9
LOC100912659	-10.2138	0.00084204	0.0800685	0	11.8659	0	12	+		zinc finger protein 709-like
Cers3	-10.2138	0.00084204	0.0800685	0	11.8659	0	12	+	rno:499174	ceramide synthase 3	0	Cers3	Ceramide synthase 3
RGD1564854	-10.2138	0.00084204	0.0800685	0	11.8659	0	12	+	rno:502617	similar to divalent cation tolerant protein CUTA	3e-50	Cutal	D730039F16Rik protein
Rmt1	-10.2138	0.00084204	0.0800685	0	11.8659	0	12	-	rno:246306	mammary cancer associated protein RMT-1
Eppk1	-10.2138	0.00084204	0.0800685	0	11.8659	0	12	-		epiplakin 1	0	Eppk1	Epiplakin
Ccr5	-10.2138	0.00084204	0.0800685	0	11.8659	0	12	+	rno:117029	chemokine (C-C motif) receptor 5	0	Ccr5	C-C chemokine receptor type 5
Spata6l	-10.2138	0.00084204	0.0800685	0	11.8659	0	12	-	rno:361747	spermatogenesis associated 6-like
Pex7	-1.2131	0.43134	0.0802189	35.3955	82.0726	35	83	-	rno:308718	peroxisomal biogenesis factor 7	0	Pex7	Peroxisomal targeting signal 2 receptor
Fam204a	-0.975766	0.50847	0.0802903	87.9831	173.045	87	175	-	rno:308004	family with sequence similarity 204, member A	4e-113	Fam204a	Protein FAM204A
Crebbp	-0.823419	0.565101	0.0804669	638.13	1129.24	631	1142	+	rno:54244	CREB binding protein	0	Crebbp	CREB-binding protein
Tmc7	-1.61897	0.325568	0.0810192	14.1582	43.5084	14	44	-	rno:499254	transmembrane channel-like 7	0	Tmc7	Transmembrane channel-like protein 7
LOC102552179	-0.915479	0.530168	0.0811778	128.435	242.262	127	245	-		uncharacterized LOC102552179
Rasgef1a	1.14266	2.20788	0.0812606	96.0735	43.5084	95	44	+	rno:312664	RasGEF domain family, member 1A	0	Rasgef1a	MCG133012
Abl2	-0.832557	0.561533	0.0812818	379.237	675.368	375	683	+	rno:304883	ABL proto-oncogene 2, non-receptor tyrosine kinase	0	Abl2	Abelson tyrosine-protein kinase 2
Sh3yl1	-0.84293	0.55751	0.0815362	293.277	526.056	290	532	+	rno:362724	SH3 and SYLF domain containing 1	0	Sh3yl1	SH3 domain-containing YSC84-like protein 1
RGD1308117	1.19779	2.29387	0.0815854	83.9379	36.5866	83	37	-	rno:361066	similar to 9930012K11Rik protein	6e-171	9930012K11Rik	Protein 9930012K11Rik
Cdhr1	-1.65871	0.316723	0.0820149	13.1469	41.5307	13	42	-	rno:93662	cadherin-related family member 1	0	Cdhr1	Pcdh21 protein
Metrnl	0.987664	1.98297	0.0820282	160.797	81.0838	159	82	+	rno:316842	meteorin, glial cell differentiation regulator-like	4e-164	Metrnl	Meteorin-like protein
LOC103694188	-1.81455	0.284292	0.0824575	10.113	35.5978	10	36	-		uncharacterized LOC103694188
Sox15	-1.81455	0.284292	0.0824575	10.113	35.5978	10	36	+	rno:363632	SRY (sex determining region Y)-box 15
Exoc4	-0.837498	0.559613	0.0826344	322.605	576.486	319	583	+	rno:116654	exocyst complex component 4	0	Exoc4	Exocyst complex component 4
Zfp187	-0.899934	0.535911	0.0828172	143.605	267.972	142	271	+	rno:266792	zinc finger protein 187	9e-180	Zscan26	Zinc finger and SCAN domain-containing protein 26
Kif17	-1.75516	0.29624	0.082851	11.1243	37.5754	11	38	+		kinesin family member 17	0	Kif17	Kinesin-like protein KIF17
Esrrg	-1.75516	0.29624	0.082851	11.1243	37.5754	11	38	+	rno:360896	estrogen-related receptor gamma	0	Esrrg	Estrogen-related receptor gamma
LOC103692359	0.950737	1.93286	0.0831011	191.136	98.8826	189	100	-		glyceraldehyde-3-phosphate dehydrogenase pseudogene
Zfp780b	-1.39039	0.381462	0.0844048	22.2486	58.3408	22	59	+		zinc finger protein 780B	0	Zfp780b	Protein Zfp780b
Jam2	-0.825545	0.564269	0.0847317	436.882	774.251	432	783	+	rno:619374	junctional adhesion molecule 2	4e-158	Jam2	Junctional adhesion molecule B
Zfp236	-0.82383	0.56494	0.0848642	469.243	830.614	464	840	-	rno:291409	zinc finger protein 236	0	Zfp236	Protein Zfp236
LOC102553981	-2.48821	0.178227	0.0849285	4.0452	22.743	4	23	+		uncharacterized LOC102553981
Atp7b	-1.28921	0.409176	0.0849399	28.3164	69.2179	28	70	+	rno:24218	ATPase, Cu++ transporting, beta polypeptide	0	Atp7b	Copper-transporting ATPase 2
Abhd15	1.58431	2.99865	0.085076	44.4972	14.8324	44	15	-	rno:303343	abhydrolase domain containing 15	0	Abhd15	Alpha/beta hydrolase
Mxd1	-0.824539	0.564663	0.085098	450.028	796.994	445	806	-	rno:362391	max dimerization protein 1	3e-114	Mxd1	Max dimerization protein 1
Stx17	-1.17887	0.441696	0.0855782	38.4294	87.0167	38	88	+	rno:252853	syntaxin 17	4e-142	Stx17	Syntaxin-17
Pml	0.831296	1.77928	0.0858852	601.723	338.179	595	342	-	rno:315713	promyelocytic leukemia	0	Pml	Promyelocytic leukemia
LOC102547029	-1.11327	0.462246	0.0858938	47.5311	102.838	47	104	+		cAMP-dependent protein kinase catalytic subunit beta-like
LOC102547455	-1.01956	0.493267	0.0859897	68.7684	139.425	68	141	-		uncharacterized LOC102547455
Cacna2d3	-0.868283	0.547799	0.0859979	190.124	347.078	188	351	-	rno:306243	calcium channel, voltage-dependent, alpha2/delta subunit 3	0	Cacna2d3	Voltage-dependent calcium channel subunit alpha-2/delta-3
Thnsl1	-0.959641	0.514185	0.0861885	93.0396	180.955	92	183	+	rno:498805	threonine synthase-like 1 (S. cerevisiae)	0	Thnsl1	Threonine synthase-like 1 (Bacterial)
Luc7l3	-0.821345	0.565914	0.0862649	503.627	889.944	498	900	-	rno:360602	LUC7-like 3 (S. cerevisiae)	0	Luc7l3	Luc7-like protein 3
Rspry1	-0.824051	0.564854	0.0864529	437.893	775.24	433	784	-	rno:689249	ring finger and SPRY domain containing 1	0	Rspry1	Putative uncharacterized protein
Pias3	0.827131	1.77415	0.0866008	661.39	372.788	654	377	+	rno:83614	protein inhibitor of activated STAT, 3	0	Pias3	E3 SUMO-protein ligase PIAS3
RGD1303130	0.820078	1.7655	0.08663	2225.87	1260.75	2201	1275	+	rno:295231	glycosylated lysosomal membrane protein	0	Glmp	Protein Glmp
Fam216b	1.43795	2.70936	0.0867672	53.5989	19.7765	53	20	-		family with sequence similarity 216, member B	2e-61	Fam216b	Protein FAM216B
Abca8a	-1.06873	0.47674	0.0875056	55.6215	116.682	55	118	-	rno:303638	ATP-binding cassette, subfamily A (ABC1), member 8a	0	Abca8a	ATP-binding cassette sub-family A member 8-A
Tcea1	-0.846247	0.55623	0.0876847	250.802	450.905	248	456	-	rno:362479	transcription elongation factor A (SII) 1	1e-170	Tcea1	Transcription elongation factor A protein 1
Nipbl	-0.845142	0.556656	0.0878298	254.848	457.827	252	463	-		Nipped-B homolog (Drosophila)	0	Nipbl	Nipbl protein
Plekhn1	-0.939223	0.521514	0.0878446	104.164	199.743	103	202	-	rno:298694	pleckstrin homology domain containing, family N member 1	0	Plekhn1	Probable pleckstrin homology domain-containing family N member 1
Ino80d	-0.863488	0.549622	0.0883491	196.192	356.966	194	361	-	rno:316440	INO80 complex subunit D	0	Ino80d	INO80 complex subunit D
Nim1k	-0.854001	0.553248	0.0887506	220.463	398.497	218	403	-	rno:310376	NIM1 serine/threonine protein kinase	0	Nim1k	Serine/threonine-protein kinase NIM1
Hsdl2	-0.816889	0.567665	0.0888169	611.836	1077.82	605	1090	+	rno:313200	hydroxysteroid dehydrogenase like 2	0	Hsdl2	Hydroxysteroid dehydrogenase-like protein 2
Otud4	-0.820391	0.566289	0.0890587	469.243	828.637	464	838	-	rno:307774	OTU deubiquitinase 4	0	Otud4	OTU domain-containing protein 4
Ep300	-0.815963	0.568029	0.0890875	821.175	1445.66	812	1462	+	rno:170915	E1A binding protein p300	0	Ep300	Histone acetyltransferase p300
Col12a1	-0.827057	0.563678	0.0892499	365.079	647.681	361	655	-	rno:25683	collagen, type XII, alpha 1	0	Col12a1	Collagen alpha-1(XII) chain
Pkd2	-0.861194	0.550497	0.0895075	199.226	361.91	197	366	-	rno:498328	polycystic kidney disease 2 (autosomal dominant)	0	Pkd2	Polycystin-2
Pcdhga10	0.893854	1.85813	0.090524	260.915	140.413	258	142	+	rno:498849	protocadherin gamma subfamily A, 10	0	Pcdhga10	Protocadherin gamma A10
Tsen34	0.901901	1.86853	0.0905509	245.746	131.514	243	133	-	rno:292534	tRNA splicing endonuclease 34 homolog (S. cerevisiae)	2e-169	Tsen34	tRNA-splicing endonuclease subunit Sen34
Rabif	-0.976263	0.508295	0.0906226	82.9266	163.156	82	165	+	rno:304807	RAB interacting factor	9e-68	Rabif	Putative uncharacterized protein
Gcfc2	-0.996434	0.501237	0.0908744	74.8362	149.313	74	151	+	rno:312474	GC-rich sequence DNA-binding factor 2	0	Gcfc2	GC-rich sequence DNA-binding factor 2
Coro7	1.10551	2.15175	0.0914517	102.141	47.4637	101	48	+	rno:192276	coronin 7	0	Coro7	Coronin-7
Cdc40	-0.830285	0.562418	0.091957	317.548	564.62	314	571	+	rno:361859	cell division cycle 40	0	Cdc40	Putative uncharacterized protein
Zfp583	-1.07241	0.475525	0.0931325	53.5989	112.726	53	114	+	rno:499068	zinc finger protein 583	0	Zfp583	Zinc finger protein 583
Fam49b	-0.812832	0.569263	0.0932779	830.277	1458.52	821	1475	-	rno:299909	family with sequence similarity 49, member B	0	Fam49b	Protein FAM49B
Rad18	-1.02191	0.492462	0.0935731	65.7345	133.492	65	135	-	rno:362412	RAD18 E3 ubiquitin protein ligase	0	Rad18	E3 ubiquitin-protein ligase RAD18
Pcdh15	-1.02191	0.492462	0.0935731	65.7345	133.492	65	135	+	rno:690865	protocadherin 15	0	Pcdh15	Protocadherin-15
Rps4y2	0.947232	1.92817	0.0937416	183.045	94.9273	181	96	+	rno:690845	ribosomal protein S4, Y-linked 2	2e-145	Rps4x	40S ribosomal protein S4, X isoform
Acvrl1	0.977885	1.96958	0.0941203	157.763	80.0949	156	81	+	rno:25237	activin A receptor type II-like 1	0	Acvrl1	Serine/threonine-protein kinase receptor R3
LOC501033	-1.32338	0.399598	0.0941675	25.2825	63.2849	25	64	-	rno:501033	similar to UPF0258 protein KIAA1024	0	AF529169	Protein AF529169
Fam227a	-1.32338	0.399598	0.0941675	25.2825	63.2849	25	64	-	rno:300074	family with sequence similarity 227, member A	0	Fam227a	Protein Fam227a
Mtcp1	-2.28724	0.204867	0.0949254	5.0565	24.7207	5	25	-	rno:498814	mature T-cell proliferation 1	1e-13	Tcl1	T-cell leukemia/lymphoma protein 1A
LOC500124	1.69455	3.23675	0.0953781	38.4294	11.8659	38	12	-	rno:500124	similar to RIKEN cDNA 4921507P07	0	4921507P07Rik	Putative uncharacterized protein
Crb1	-3.86125	0.0688096	0.0953974	1.0113	14.8324	1	15	-	rno:304825	crumbs family member 1, photoreceptor morphogenesis associated	0	Crb1	Crb1 protein
Zfp30	-3.86125	0.0688096	0.0953974	1.0113	14.8324	1	15	+		ZFP30 zinc finger protein	0	Zfp30	Zinc finger protein 30
Cntnap5c	-3.86125	0.0688096	0.0953974	1.0113	14.8324	1	15	+	rno:297846	contactin associated protein-like 5C	0	Cntnap5a	Contactin-associated protein like 5-1
LOC103691212	-1.0967	0.467584	0.0956841	48.5424	103.827	48	105	+		pleckstrin homology domain-containing family A member 6-like	3e-54	Plekha7	Pleckstrin homology domain-containing family A member 7
Calcrl	1.47669	2.78309	0.0957498	49.5537	17.7989	49	18	-	rno:25029	calcitonin receptor-like	3e-153	Calcr	Calcitonin receptor CR-1a
Hsd11b1	1.47669	2.78309	0.0957498	49.5537	17.7989	49	18	-	rno:25116	hydroxysteroid 11-beta dehydrogenase 1	8e-149	Hsd11b1	Corticosteroid 11-beta-dehydrogenase isozyme 1
Clasp2	-0.829257	0.562819	0.0962166	2593.98	4608.92	2565	4661	+	rno:114514	cytoplasmic linker associated protein 2	0	Clasp2	Clasp2 protein
Rab23	-0.812792	0.569279	0.0963014	526.887	925.542	521	936	-	rno:367242	RAB23, member RAS oncogene family	2e-136	Rab23	Ras-related protein Rab-23
Ift80	-1.02275	0.492178	0.0963241	64.7232	131.514	64	133	-	rno:295106	intraflagellar transport 80	0	Ift80	Intraflagellar transport protein 80 homolog
Twsg1	-0.810342	0.570246	0.0964852	714.989	1253.83	707	1268	+	rno:363294	twisted gastrulation BMP signaling modulator 1	2e-124	Twsg1	Twisted gastrulation protein homolog 1
RGD1307100	-0.829307	0.562799	0.0977981	293.277	521.112	290	527	+	rno:294978	similar to RIKEN cDNA D630029K19
Adhfe1	-1.1261	0.458154	0.0981831	43.4859	94.9273	43	96	-	rno:362474	alcohol dehydrogenase, iron containing, 1	0	Adhfe1	Hydroxyacid-oxoacid transhydrogenase, mitochondrial
Fam98b	1.74199	3.34495	0.0984643	36.4068	10.8771	36	11	+	rno:499866	family with sequence similarity 98, member B	5e-160	Fam98b	Protein FAM98B
Gpr4	1.74199	3.34495	0.0984643	36.4068	10.8771	36	11	+	rno:308408	G protein-coupled receptor 4	0	Gpr4	G protein-coupled receptor GPR4
LOC103690999	2.29314	4.9012	0.0987678	24.2712	4.94413	24	5	-		uncharacterized LOC103690999
Ice2	-1.02361	0.491885	0.0991967	63.7119	129.536	63	131	+	rno:691379	interactor of little elongator complex ELL subunit 2
Vav3	-1.07637	0.474222	0.099311	51.5763	108.771	51	110	+	rno:295378	vav 3 guanine nucleotide exchange factor	0	Vav1	Proto-oncogene vav
Wwc2	-0.830575	0.562305	0.0993866	279.119	496.391	276	502	+	rno:498630	WW and C2 domain containing 2	0	Wwc2	Protein WWC2
Lhfp	-0.807935	0.571199	0.0998149	724.091	1267.68	716	1282	+	rno:499615	lipoma HMGIC fusion partner	4e-112	Lhfp	Putative uncharacterized protein
Zcchc7	-0.967494	0.511394	0.0999082	82.9266	162.168	82	164	+	rno:298086	zinc finger, CCHC domain containing 7	0	Zcchc7	Zinc finger CCHC domain-containing protein 7
Ndufa10l1	0.962797	1.94908	0.10046	163.831	84.0502	162	85	-	rno:316632	NADH dehydrogenase (ubiquinone) 1 alpha subcomplex 10-like 1	0	Ndufa10	NADH dehydrogenase [ubiquinone] 1 alpha subcomplex subunit 10, mitochondrial
Tia1	-0.807999	0.571173	0.100512	622.961	1090.68	616	1103	+	rno:312510	TIA1 cytotoxic granule-associated RNA binding protein	5e-143	Tial1	Nucleolysin TIAR
Foxo1	-0.944046	0.519773	0.10078	94.0509	180.955	93	183	+	rno:84482	forkhead box O1	0	Foxo1	Putative uncharacterized protein
Fbxo38	-0.810308	0.57026	0.101015	494.526	867.201	489	877	-		F-box protein 38	0	Fbxo38	Putative uncharacterized protein
Frg1l1	1.79692	3.47477	0.101157	34.3842	9.88826	34	10	-	rno:689484	FSHD region gene 1-like 1
Cpped1	1.0733	2.10424	0.101289	108.209	51.419	107	52	+	rno:302890	calcineurin-like phosphoesterase domain containing 1	5e-170	Cpped1	Serine/threonine-protein phosphatase CPPED1
Entpd2	-0.808258	0.571071	0.101949	1044.67	1829.33	1033	1850	+	rno:64467	ectonucleoside triphosphate diphosphohydrolase 2	0	Entpd2	Ectonucleoside triphosphate diphosphohydrolase 2
Mboat4	-2.13567	0.227562	0.101988	6.0678	26.6983	6	27	-	rno:306515	membrane bound O-acyltransferase domain containing 4	0	Mboat4	Ghrelin O-acyltransferase
Vwf	1.26161	2.39763	0.10221	68.7684	28.676	68	29	+	rno:116669	von Willebrand factor	0	Vwf	Vwf protein
LOC100362738	0.833193	1.78162	0.102534	443.961	249.184	439	252	-	rno:100362738	M2 pyruvate kinase-like	0	Pkm	Pyruvate kinase PKM
Kcna2	-1.07846	0.473534	0.102628	50.565	106.793	50	108	+	rno:25468	potassium voltage-gated channel, shaker-related subfamily, member 2	0	Kcna2	Potassium voltage-gated channel subfamily A member 2
Rnf151	-1.26845	0.415105	0.102642	28.3164	68.229	28	69	-	rno:302977	ring finger protein 151	3e-112	Rnf151	RING finger protein 151
Bmpr2	-0.815559	0.568188	0.103061	374.181	658.558	370	666	+	rno:140590	bone morphogenetic protein receptor, type II (serine/threonine kinase)	0	Bmpr2	Bone morphogenetic protein receptor type-2
Cd109	1.86132	3.6334	0.103254	32.3616	8.89944	32	9	+		CD109 molecule	0	Cd109	CD109 antigen
Stard6	3.11345	8.65448	0.103436	17.1921	1.97765	17	2	+	rno:291527	StAR-related lipid transfer (START) domain containing 6	2e-109	Stard6	StAR-related lipid transfer protein 6
Bcl2l1-ps1	3.11345	8.65448	0.103436	17.1921	1.97765	17	2	-	rno:293190	Bcl2-like 1, pseudogene 1
Golga5	-0.839676	0.558769	0.103978	226.531	405.419	224	410	+	rno:299258	golgin A5	0	Golga5	Golgin subfamily A member 5
Zhx1	-0.810345	0.570246	0.104474	435.87	764.363	431	773	-	rno:171159	zinc fingers and homeoboxes 1	0	Zhx1	Zinc fingers and homeoboxes protein 1
Gpr18	1.93796	3.83165	0.104486	30.339	7.91061	30	8	-	rno:679957	G protein-coupled receptor 18	2e-178	Gpr18	N-arachidonyl glycine receptor
Nfe2	2.03085	4.08645	0.104492	28.3164	6.92179	28	7	-	rno:366998	nuclear factor, erythroid 2	0	Nfe2	Transcription factor NF-E2 45 kDa subunit
Shc4	2.03085	4.08645	0.104492	28.3164	6.92179	28	7	-	rno:679845	SHC (Src homology 2 domain containing) family, member 4	0	Shc4	SHC-transforming protein 4
Tnfaip8l3	2.03085	4.08645	0.104492	28.3164	6.92179	28	7	-	rno:315673	tumor necrosis factor, alpha-induced protein 8-like 3	4e-116	Tnfaip8l3	Tumor necrosis factor alpha-induced protein 8-like protein 3
Sarnp	-0.958883	0.514455	0.104502	84.9492	165.134	84	167	+	rno:362819	SAP domain containing ribonucleoprotein	2e-107	Sarnp	SAP domain-containing ribonucleoprotein
Itga7	-0.816014	0.568009	0.10487	354.966	624.938	351	632	+	rno:81008	integrin, alpha 7	0	Itga7	Integrin alpha-7
Il17rd	-0.855715	0.552592	0.104958	183.045	331.257	181	335	+	rno:498576	interleukin 17 receptor D	0	Il17rd	RIKEN cDNA 2810004A10
Rccd1	-0.967491	0.511395	0.105193	80.904	158.212	80	160	-	rno:308760	RCC1 domain containing 1	7e-21	Herc2	E3 ubiquitin-protein ligase HERC2
Zcchc11	-0.840221	0.558558	0.105336	221.475	396.519	219	401	+	rno:313481	zinc finger, CCHC domain containing 11	0	Zcchc11	Terminal uridylyltransferase 4
Dnajc28	-1.58581	0.333138	0.105349	14.1582	42.5195	14	43	-	rno:360699	DnaJ (Hsp40) homolog, subfamily C, member 28	0	Dnajc28	DnaJ homolog subfamily C member 28
Rps24	0.811328	1.75483	0.105538	2882.2	1642.44	2850	1661	+	rno:81776	ribosomal protein S24	3e-72	Rps24	40S ribosomal protein S24
Dtna	-0.808717	0.570889	0.105703	451.04	790.072	446	799	+		dystrobrevin, alpha	0	Dtna	Dystrobrevin
Fbxl3-ps1	-1.04145	0.485839	0.105746	57.6441	118.659	57	120	-		F-box and leucine-rich repeat protein 3, pseudogene 1	0	Fbxl21	F-box/LRR-repeat protein 21
Rsf1	-0.817	0.567621	0.10619	336.763	593.296	333	600	+	rno:308839	remodeling and spacing factor 1	0	Rsf1	Protein Rsf1
Tmem26	-1.27847	0.412233	0.106491	27.3051	66.2514	27	67	-	rno:309724	transmembrane protein 26	0	Tmem26	Tmem26 protein
RGD1310587	-2.01667	0.247128	0.106678	7.0791	28.676	7	29	-	rno:360894	similar to hypothetical protein FLJ14146	5e-61	C130074G19Rik	Uncharacterized protein C1orf115 homolog
Cdkn1b	-0.818566	0.567005	0.107692	2272.39	4007.71	2247	4053	+	rno:83571	cyclin-dependent kinase inhibitor 1B	7e-111	Cdkn1b	Cyclin-dependent kinase inhibitor 1B
Abcb4	0.875974	1.83525	0.10795	264.961	144.369	262	146	-	rno:24891	ATP-binding cassette, subfamily B (MDR/TAP), member 4	0	Abcb4	Multidrug resistance protein 3
Tnfrsf1b	0.875974	1.83525	0.10795	264.961	144.369	262	146	-	rno:156767	tumor necrosis factor receptor superfamily, member 1b	0	Tnfrsf1b	Tumor necrosis factor receptor superfamily member 1B
Arsa	-0.82427	0.564768	0.108063	278.107	492.436	275	498	-	rno:315222	arylsulfatase A	0	Arsa	Arylsulfatase A
LOC103691357	-2.70053	0.153837	0.109072	3.0339	19.7765	3	20	-		uncharacterized LOC103691357
Fan1	-0.846764	0.556031	0.109488	195.181	351.033	193	355	-	rno:309256	FANCD2/FANCI-associated nuclease 1	0	Fan1	Fanconi-associated nuclease 1
Ggt5	-1.92046	0.26417	0.109493	8.0904	30.6536	8	31	-	rno:29566	gamma-glutamyltransferase 5	0	Ggt5	Gamma-glutamyltransferase 5
Pltp	-0.801559	0.573729	0.109531	651.277	1135.17	644	1148	-	rno:296371	phospholipid transfer protein	0	Pltp	Phospholipid transfer protein
Tmem163	-0.999415	0.500203	0.11047	67.7571	135.469	67	137	-	rno:360839	transmembrane protein 163	4e-141	Tmem163	Transmembrane protein 163
Caap1	-0.874424	0.545472	0.110548	145.627	266.983	144	270	-	rno:500501	caspase activity and apoptosis inhibitor 1
LOC102548251	-1.84091	0.279147	0.11085	9.1017	32.6313	9	33	-		uncharacterized LOC102548251
Rspo2	-1.40009	0.378904	0.111992	20.226	53.3966	20	54	-	rno:500863	R-spondin 2	2e-141	Rspo2	R-spondin-2
Aurkc	-0.95856	0.51457	0.112885	81.9153	159.201	81	161	-	rno:292554	aurora kinase C	3e-146	Aurkc	Aurora kinase C
Myl12a	0.79822	1.73895	0.113649	1618.08	930.486	1600	941	-	rno:501203	myosin, light chain 12A, regulatory, non-sarcomeric	1e-98	Myl12a	Protein Myl12a
LOC100911553	-0.838815	0.559103	0.113814	207.316	370.81	205	375	+		uncharacterized LOC100911553
LOC103689948	10.1208	1113.43	0.113891	11.1243	0	11	0	-		calcineurin-binding protein cabin-1-like	0	Cabin1	Calcineurin binding protein 1, isoform CRA_a
Ankrd1	10.1208	1113.43	0.113891	11.1243	0	11	0	-	rno:27064	ankyrin repeat domain 1	3e-175	Ankrd1	Ankyrin repeat domain-containing protein 1
Pcdhac1	10.1208	1113.43	0.113891	11.1243	0	11	0	+	rno:393091	protocadherin alpha subfamily C, 1	0	Pcdhac1	Protocadherin alpha C1
Rnf207	10.1208	1113.43	0.113891	11.1243	0	11	0	-	rno:691246	ring finger protein 207	0	Rnf207	Ring finger protein 207
RT1-CE10	10.1208	1113.43	0.113891	11.1243	0	11	0	-	rno:414792	RT1 class I, locus CE10	6e-127	Gm10499	predicted gene 10499
Espn	10.1208	1113.43	0.113891	11.1243	0	11	0	-	rno:56227	espin	0	Espn	Espin
LOC100360362	10.1208	1113.43	0.113891	11.1243	0	11	0	-	rno:100360362	hypothetical protein LOC100360362
LOC103690006	10.1208	1113.43	0.113891	11.1243	0	11	0	-		RNA/RNP complex-1-interacting phosphatase	1e-157	Dusp11	RNA/RNP complex-1-interacting phosphatase
Cpn1	10.1208	1113.43	0.113891	11.1243	0	11	0	-	rno:365466	carboxypeptidase N, polypeptide 1	0	Cpn1	Carboxypeptidase N catalytic chain
Cps1	10.1208	1113.43	0.113891	11.1243	0	11	0	+	rno:497840	carbamoyl-phosphate synthetase 1	0	Cad	CAD protein
LOC100911951	10.1208	1113.43	0.113891	11.1243	0	11	0	+		Kv channel-interacting protein 2-like	1e-160	Kcnip2	Kv channel-interacting protein 2
LOC103690158	10.1208	1113.43	0.113891	11.1243	0	11	0	+		lethal(3)malignant brain tumor-like protein 4	4e-67	L3mbtl4	Lethal(3)malignant brain tumor-like protein 4
LOC102548621	10.1208	1113.43	0.113891	11.1243	0	11	0	-		uncharacterized LOC102548621
LOC102551936	10.1208	1113.43	0.113891	11.1243	0	11	0	-		late cornified envelope protein 1C-like
LOC103692139	10.1208	1113.43	0.113891	11.1243	0	11	0	+		contactin-associated protein-like 2	4e-180	Cntnap2	Cntnap2 protein
LOC102551157	10.1208	1113.43	0.113891	11.1243	0	11	0	-		uncharacterized LOC102551157
Mall	10.1208	1113.43	0.113891	11.1243	0	11	0	-	rno:362211	mal, T-cell differentiation protein-like	4e-78	Mall	MAL-like protein
Kcne3	10.1208	1113.43	0.113891	11.1243	0	11	0	+	rno:63883	potassium voltage-gated channel, Isk-related family, member 3	2e-54	Kcne3	MinK-related peptide 2
LOC690283	10.1208	1113.43	0.113891	11.1243	0	11	0	+		similar to TAF5-like RNA polymerase II, p300/CBP-associated factor (PCAF)-associated factor	0	Taf5l	Putative uncharacterized protein
LOC102556439	10.1208	1113.43	0.113891	11.1243	0	11	0	+		uncharacterized LOC102556439
LOC103693985	10.1208	1113.43	0.113891	11.1243	0	11	0	-		uncharacterized LOC103693985
Niacr1	10.1208	1113.43	0.113891	11.1243	0	11	0	+	rno:353250	niacin receptor 1	0	Hcar2	G protein-coupled receptor 109A
LOC103691630	10.1208	1113.43	0.113891	11.1243	0	11	0	-		uncharacterized LOC103691630
LOC103691660	10.1208	1113.43	0.113891	11.1243	0	11	0	+		uncharacterized LOC103691660
LOC102550621	10.1208	1113.43	0.113891	11.1243	0	11	0	-		uncharacterized LOC102550621
LOC102547011	10.1208	1113.43	0.113891	11.1243	0	11	0	+		uncharacterized LOC102547011	1e-53	Gm13547	Protein Gm13547
Il19	10.1208	1113.43	0.113891	11.1243	0	11	0	-	rno:681145	interleukin 19	1e-82	Il19	Interleukin-19
LOC102549402	10.1208	1113.43	0.113891	11.1243	0	11	0	+		uncharacterized LOC102549402
LOC102550564	10.1208	1113.43	0.113891	11.1243	0	11	0	-		zinc finger protein 665-like
LOC102549158	10.1208	1113.43	0.113891	11.1243	0	11	0	+		sorting nexin-1-like
Irx5	10.1208	1113.43	0.113891	11.1243	0	11	0	+	rno:498918	iroquois homeobox 5	0	Irx5	Iroquois homeobox protein 5
Mir9-3	10.1208	1113.43	0.113891	11.1243	0	11	0	+	rno:100314149	microRNA mir-9-3
Capn9	10.1208	1113.43	0.113891	11.1243	0	11	0	+	rno:116694	calpain 9	0	Capn9	Calpain-9
Gpr3	10.1208	1113.43	0.113891	11.1243	0	11	0	-	rno:266769	G protein-coupled receptor 3	0	Gpr3	G-protein-coupled receptor 3
Hgfac	10.1208	1113.43	0.113891	11.1243	0	11	0	-	rno:58947	HGF activator	0	Hgfac	Putative uncharacterized protein
Mib1	-0.820906	0.566086	0.114438	272.04	480.57	269	486	+	rno:307594	mindbomb E3 ubiquitin protein ligase 1	0	Mib1	Mib1 protein
Zfp445	-0.831987	0.561755	0.114856	225.52	401.464	223	406	-	rno:301076	zinc finger protein 445	0	Zfp445	Mszf29
Slc14a1	-0.823017	0.565259	0.115004	259.904	459.804	257	465	-	rno:54301	solute carrier family 14 (urea transporter), member 1	0	Slc14a1	Putative uncharacterized protein
Zfp2	-0.958447	0.514611	0.115899	80.904	157.223	80	159	-	rno:497897	zinc finger protein 2	2e-161	Zfp2	Mszf87
Msl3l2	-0.857216	0.552017	0.116004	164.842	298.626	163	302	+	rno:309790	male-specific lethal 3-like 2 (Drosophila)	0	Msl3l2	Protein Msl3l2
Sox11	-0.810827	0.570055	0.116538	2052.94	3601.31	2030	3642	-	rno:84046	SRY (sex determining region Y)-box 11	0	Sox11	SRY-box containing gene 11
Ccdc30	-0.967487	0.511396	0.117069	76.8588	150.302	76	152	-	rno:362580	coiled-coil domain containing 30	0	Ccdc30	Coiled-coil domain-containing protein 30
Fam71e1	-1.06504	0.477959	0.117151	50.565	105.804	50	107	+	rno:361564	family with sequence similarity 71, member E1	1e-93	Fam71e1	Protein FAM71E1
Svip	-0.916631	0.529745	0.117582	102.141	192.821	101	195	-	rno:499157	small VCP/p97-interacting protein	7e-28	Svip	Putative uncharacterized protein
Olfml1	-1.08771	0.470508	0.117628	46.5198	98.8826	46	100	+	rno:361621	olfactomedin-like 1	2e-122	Olfml1	Protein Olfml1
Astn2	0.90328	1.87031	0.11877	205.294	109.76	203	111	-	rno:100361323	astrotactin 2	0	Astn2	Astrotactin-2
LOC100360205	-0.81444	0.568629	0.118876	291.254	512.212	288	518	+	rno:100360205	palladin	0	Palld	Palladin isoform
Sos2	-0.806728	0.571677	0.119089	349.91	612.084	346	619	-	rno:85384	son of sevenless homolog 2 (Drosophila)	0	Sos2	Son of sevenless homolog 2
Ccdc108	-1.313	0.402484	0.119143	24.2712	60.3184	24	61	-	rno:301521	coiled-coil domain containing 108	0	Ccdc108	Coiled-coil domain containing 108
Aftph	-0.79634	0.575808	0.119289	560.26	973.005	554	984	-	rno:305544	aftiphilin	0	Aftph	Aftiphilin
Gba	0.794487	1.73446	0.11997	1641.34	946.307	1623	957	+	rno:684536	glucosidase, beta, acid	0	Gba	Glucosylceramidase
Tgfbr1	-0.822078	0.565627	0.120446	247.768	438.05	245	443	+	rno:29591	transforming growth factor, beta receptor 1	0	Tgfbr1	Receptor protein serine/threonine kinase
Pcdh18	-0.853162	0.55357	0.120807	165.853	299.614	164	303	-	rno:295027	protocadherin 18	0	Pcdh18	Protocadherin 18
Cbll1	-0.865173	0.548981	0.120909	147.65	268.961	146	272	-	rno:314028	Cbl proto-oncogene-like 1, E3 ubiquitin protein ligase	0	Cbll1	E3 ubiquitin-protein ligase Hakai
RGD1310016	-0.826852	0.563758	0.120957	228.554	405.419	226	410	+	rno:309306	RAB6A GEF complex partner 1
Spint1	1.44695	2.7263	0.121613	48.5424	17.7989	48	18	+	rno:311331	serine peptidase inhibitor, Kunitz type 1	0	Spint1	Putative uncharacterized protein
Apobr	1.44695	2.7263	0.121613	48.5424	17.7989	48	18	+	rno:499264	apolipoprotein B receptor	0	Apobr	Apolipoprotein B receptor
Mc4r	-0.91037	0.532049	0.12179	104.164	195.788	103	198	-	rno:25635	melanocortin 4 receptor	0	Mc4r	Melanocortin receptor 4
Nmi	1.35395	2.5561	0.122252	55.6215	21.7542	55	22	-	rno:311021	N-myc (and STAT) interactor	2e-141	Nmi	N-myc-interactor
Ryr2	-1.03046	0.489555	0.123317	56.6328	115.693	56	117	-	rno:689560	ryanodine receptor 2, cardiac	0	Ryr2	Ryanodine receptor 2
Adarb2	-0.879709	0.543477	0.123636	128.435	236.33	127	239	-	rno:117088	adenosine deaminase, RNA-specific, B2	0	Adarb1	Double-stranded RNA-specific editase 1
Mcm10	0.834557	1.78331	0.12379	350.921	196.776	347	199	+	rno:307126	minichromosome maintenance complex component 10	0	Mcm10	Protein MCM10 homolog
LOC314407	2.69128	6.45887	0.123863	19.2147	2.96648	19	3	+		similar to importin 11
Sp4	-0.8669	0.548324	0.123967	142.593	260.061	141	263	-	rno:25162	Sp4 transcription factor	0	Sp4	Transcription factor Sp4
Rab39a	-1.04836	0.483519	0.124486	52.5876	108.771	52	110	-	rno:315668	RAB39A, member RAS oncogene family	5e-124	Rab39	Rab39A
Kif16b	-1.00141	0.499511	0.124556	63.7119	127.559	63	129	-	rno:311478	kinesin family member 16B	0	Kif16b	Kinesin-like protein KIF16B
Dnal1	-0.899773	0.535971	0.124638	110.232	205.676	109	208	+	rno:685664	dynein, axonemal, light chain 1	6e-103	Dnal1	Dynein light chain 1, axonemal
Chd7	-0.792986	0.577148	0.124717	940.509	1629.59	930	1648	+		chromodomain helicase DNA binding protein 7	0	Chd7	Chromodomain-helicase-DNA-binding protein 7
Fbxo11	-0.812102	0.569551	0.12477	282.153	495.402	279	501	-	rno:301674	F-box protein 11	0	Fbxo11	F-box protein 11
Chd2	-0.791677	0.577672	0.125322	643.187	1113.42	636	1126	-	rno:308738	chromodomain helicase DNA binding protein 2	0	Chd2	Chromodomain-helicase-DNA-binding protein 2
Zim1	-2.42411	0.186324	0.125325	4.0452	21.7542	4	22	+	rno:308322	zinc finger, imprinted 1	0	Zim1	Zinc finger, imprinted 1, isoform CRA_b
Muc1	-2.42411	0.186324	0.125325	4.0452	21.7542	4	22	+	rno:24571	mucin 1, cell surface associated	0	Muc1	Mucin-1
Atp10d	0.971782	1.96126	0.12557	141.582	72.1843	140	73	-	rno:360932	ATPase, class V, type 10D	0	Atp10b	Phospholipid-translocating ATPase
Kdelc1	-0.87899	0.543748	0.12604	127.424	234.352	126	237	-	rno:316370	KDEL (Lys-Asp-Glu-Leu) containing 1	0	Kdelc1	KDEL motif-containing protein 1
Kcng2	1.06084	2.08614	0.126977	103.153	49.4413	102	50	-	rno:307234	potassium voltage-gated channel, subfamily G, member 2	0	Kcng2	Protein Kcng2
Fancm	-0.89913	0.53621	0.127373	109.22	203.698	108	206	+		Fanconi anemia, complementation group M
Sidt1	0.908097	1.87657	0.127519	191.136	101.849	189	103	+	rno:288109	SID1 transmembrane family, member 1	0	Sidt2	SID1 transmembrane family member 2
Map3k11	0.78846	1.72723	0.128242	1180.19	683.279	1167	691	+	rno:309168	mitogen-activated protein kinase kinase kinase 11	0	Map3k9	Mitogen-activated protein kinase kinase kinase 9
Chrd	-1.00195	0.499324	0.128478	62.7006	125.581	62	127	-	rno:117275	chordin	0	Chrd	Chordin
Glis3	-0.977893	0.507721	0.128991	69.7797	137.447	69	139	-		GLIS family zinc finger 3	0	Glis3	Glis3 protein
Churc1	0.840904	1.79117	0.129258	313.503	175.022	310	177	+	rno:299154	churchill domain containing 1	3e-61	Churc1	Protein Churchill
Pdgfb	0.916254	1.88721	0.129494	181.023	95.9162	179	97	-	rno:24628	platelet-derived growth factor beta polypeptide	1e-137	Pdgfb	Platelet-derived growth factor subunit B
Cstb	0.797953	1.73863	0.130142	3008.62	1730.45	2975	1750	-	rno:25308	cystatin B (stefin B)	4e-48	Cstb	Cystatin-B
Kcp	-1.20295	0.434387	0.130664	31.3503	72.1843	31	73	-	rno:296952	kielin/chordin-like protein	0	Kcp	Kielin/chordin-like protein
Igsf10	-0.841253	0.558159	0.130838	174.955	313.458	173	317	-	rno:310448	immunoglobulin superfamily, member 10	0	Igsf10	Immunoglobulin superfamily member 10
Rbm45	-0.803132	0.573104	0.131153	314.514	548.799	311	555	+	rno:266631	RNA binding motif protein 45	0	Rbm45	Putative uncharacterized protein
Scn5a	0.92543	1.89925	0.131654	170.91	89.9832	169	91	-	rno:25665	sodium channel, voltage-gated, type V, alpha subunit	0	Scn5a	Sodium channel voltage-gated type V alpha polypeptide
Ninl	-0.82553	0.564275	0.131756	210.35	372.788	208	377	-	rno:311529	ninein-like	0	Ninl	Ninein-like protein
Alg9	0.803247	1.74502	0.132246	522.842	299.614	517	303	+	rno:367083	alpha-1,2-mannosyltransferase	0	Alg9	Alpha-1,2-mannosyltransferase ALG9
Ppp1r9a	-0.796158	0.575881	0.132987	370.136	642.737	366	650	+	rno:84685	protein phosphatase 1, regulatory subunit 9A	0	Ppp1r9a	Protein Ppp1r9a
Bbs5	-1.35621	0.390608	0.13352	21.2373	54.3855	21	55	+	rno:362142	Bardet-Biedl syndrome 5	0	Bbs5	Bardet-Biedl syndrome 5 protein homolog
Tgfa	-0.798175	0.575076	0.134741	337.774	587.363	334	594	+	rno:24827	transforming growth factor alpha	4e-86	Tgfa	Protransforming growth factor alpha
LOC100362980	-1.07321	0.47526	0.134754	46.5198	97.8938	46	99	+	rno:100362980	CG3918-like	1e-30	Srek1ip1	Protein SREK1IP1
Ccdc17	-1.07321	0.47526	0.134754	46.5198	97.8938	46	99	+	rno:500528	coiled-coil domain containing 17	0	Ccdc17	Ccdc17 protein
Tspyl4	-0.795201	0.576263	0.134912	1602.91	2781.57	1585	2813	+	rno:309828	TSPY-like 4	0	Tspyl4	Putative uncharacterized protein
Rmdn2	-3.04878	0.120844	0.13503	2.0226	16.81	2	17	+	rno:313840	regulator of microtubule dynamics 2	0	Rmdn2	Protein 4921513D11Rik
Ccdc125	-3.04878	0.120844	0.13503	2.0226	16.81	2	17	+	rno:499518	coiled-coil domain containing 125	0	Ccdc125	RIKEN cDNA 5830436D01, isoform CRA_b
Pdzrn3	-0.786304	0.579828	0.135083	839.379	1447.64	830	1464	-	rno:312607	PDZ domain containing RING finger 3	0	Pdzrn3	E3 ubiquitin-protein ligase PDZRN3
Utrn	-0.857511	0.551904	0.135352	144.616	262.039	143	265	-	rno:25600	utrophin	0	Utrn	Protein Utrn
Ccdc47	-0.788476	0.578955	0.135434	1087.15	1877.78	1075	1899	-	rno:303606	coiled-coil domain containing 47	0	Ccdc47	Coiled-coil domain-containing protein 47
Pde5a	-0.792958	0.577159	0.135766	390.362	676.357	386	684	+	rno:171115	phosphodiesterase 5A, cGMP-specific	0	Pde5a	cGMP-specific 3',5'-cyclic phosphodiesterase
Pnn	-0.799643	0.574491	0.136247	317.548	552.754	314	559	+	rno:368070	pinin, desmosome associated protein	0	Pnn	Pinin
LOC100910088	-2.22837	0.2134	0.13639	5.0565	23.7318	5	24	-		prolow-density lipoprotein receptor-related protein 1-like	0	Gm19410	predicted gene, 19410
LOC103693761	2.42178	5.3583	0.136514	21.2373	3.95531	21	4	-		uncharacterized LOC103693761
Aqp4	-0.79488	0.576391	0.137381	1680.78	2916.05	1662	2949	-	rno:25293	aquaporin 4	0	Aqp4	Aquaporin-4
RGD1308601	-0.856705	0.552212	0.137763	143.605	260.061	142	263	-	rno:307249	similar to hypothetical protein	0	8030462N17Rik	RIKEN cDNA 8030462N17 gene
RGD1311188	0.858608	1.81329	0.137859	252.825	139.425	250	141	+	rno:315088	similar to 1500031N24Rik protein	6e-165	Zfp707	Protein Zfp707
Glb1l	0.987222	1.98236	0.138145	127.424	64.2737	126	65	-	rno:301525	galactosidase, beta 1-like	0	Glb1l	Beta-galactosidase-1-like protein
LOC679963	0.808584	1.75149	0.138246	439.915	251.162	435	254	+		similar to eukaryotic translation elongation factor 1 alpha 1
Pycard	1.04635	2.0653	0.138419	104.164	50.4301	103	51	-	rno:282817	PYD and CARD domain containing	5e-86	Pycard	PYD and CARD domain containing
Plcb1	-0.887349	0.540607	0.138568	112.254	207.654	111	210	+	rno:24654	phospholipase C, beta 1 (phosphoinositide-specific)	0	Plcb1	1-phosphatidylinositol 4,5-bisphosphate phosphodiesterase beta-1
Sox5	-0.810925	0.570016	0.138631	245.746	431.128	243	436	-		SRY (sex determining region Y)-box 5	0	Sox6	Transcription factor SOX-6
Slc17a6	-0.967479	0.511399	0.138834	70.791	138.436	70	140	+	rno:84487	solute carrier family 17 (vesicular glutamate transporter), member 6	0	Slc17a6	Vesicular glutamate transporter 2
Rasl10a	-1.58833	0.332555	0.139267	13.1469	39.5531	13	40	+	rno:364190	RAS-like, family 10, member A
Slco2a1	-10.0884	0.000918519	0.139324	0	10.8771	0	11	+	rno:24546	solute carrier organic anion transporter family, member 2a1	0	Slco2a1	Solute carrier organic anion transporter family, member 2a1, isoform CRA_a
Uap1l2	-10.0884	0.000918519	0.139324	0	10.8771	0	11	+	rno:304954	UDP-N-acteylglucosamine pyrophosphorylase 1-like 2	0	Uap1	Putative uncharacterized protein
LOC102555032	-10.0884	0.000918519	0.139324	0	10.8771	0	11	-		uncharacterized LOC102555032
LOC365839	-10.0884	0.000918519	0.139324	0	10.8771	0	11	+		similar to elongation protein 4 homolog	0	Elp4	Elongator complex protein 4
Fcrlb	-10.0884	0.000918519	0.139324	0	10.8771	0	11	-	rno:498275	Fc receptor-like B	0	Fcrlb	Fc receptor-like B
LOC100360758	-10.0884	0.000918519	0.139324	0	10.8771	0	11	-		peroxiredoxin-1-like
Cdkl3	-10.0884	0.000918519	0.139324	0	10.8771	0	11	+	rno:60396	cyclin-dependent kinase-like 3	0	Cdkl3	Cyclin-dependent kinase-like 3
LOC103690234	-10.0884	0.000918519	0.139324	0	10.8771	0	11	+		zinc finger protein 844-like	8e-55	D130040H23Rik	Protein D130040H23Rik
Apoh	-10.0884	0.000918519	0.139324	0	10.8771	0	11	+	rno:287774	apolipoprotein H (beta-2-glycoprotein I)	4e-179	Apoh	Beta-2-glycoprotein 1
LOC103692708	-10.0884	0.000918519	0.139324	0	10.8771	0	11	-		uncharacterized LOC103692708	3e-12	Snap23	Synaptosomal-associated protein 23
LOC102548532	-10.0884	0.000918519	0.139324	0	10.8771	0	11	-		uncharacterized LOC102548532
LOC103694344	-10.0884	0.000918519	0.139324	0	10.8771	0	11	-		uncharacterized LOC103694344
LOC102548360	-10.0884	0.000918519	0.139324	0	10.8771	0	11	+		MLV-related proviral Env polyprotein-like	1e-134	LOC101056102	MLV-related proviral Env polyprotein-like
LOC102551320	-10.0884	0.000918519	0.139324	0	10.8771	0	11	-		uncharacterized LOC102551320
Krt19	-10.0884	0.000918519	0.139324	0	10.8771	0	11	-	rno:360626	keratin 19	0	Krt19	Keratin 19
RGD1563015	-10.0884	0.000918519	0.139324	0	10.8771	0	11	-	rno:500537	RGD1563015	5e-96	4930538K18Rik	Uncharacterized protein
Myh15	-10.0884	0.000918519	0.139324	0	10.8771	0	11	-	rno:303965	myosin, heavy chain 15	0	Myh15	Protein Myh15
Ap1m2	-10.0884	0.000918519	0.139324	0	10.8771	0	11	-	rno:367038	adaptor-related protein complex 1, mu 2 subunit	0	Ap1m2	Putative uncharacterized protein
LOC102556226	-10.0884	0.000918519	0.139324	0	10.8771	0	11	-		zinc finger protein 120-like
LOC102546646	-10.0884	0.000918519	0.139324	0	10.8771	0	11	-		uncharacterized LOC102546646
Myom3	-10.0884	0.000918519	0.139324	0	10.8771	0	11	+		myomesin 3	0	Myom3	Myomesin-3
LOC102552820	-10.0884	0.000918519	0.139324	0	10.8771	0	11	-		uncharacterized LOC102552820
LOC299934	-10.0884	0.000918519	0.139324	0	10.8771	0	11	-		similar to 60S ribosomal protein L7
LOC102549382	-10.0884	0.000918519	0.139324	0	10.8771	0	11	+		PCNA-associated factor-like
Stk32a	-10.0884	0.000918519	0.139324	0	10.8771	0	11	+	rno:364858	serine/threonine kinase 32A	0	Stk32a	Serine/threonine-protein kinase 32A
Itga2	-10.0884	0.000918519	0.139324	0	10.8771	0	11	-	rno:170921	integrin, alpha 2	0	Itga2	Integrin alpha-2
LOC102554679	-10.0884	0.000918519	0.139324	0	10.8771	0	11	+		uncharacterized LOC102554679
Vps13b	-0.846231	0.556236	0.139474	156.751	281.816	155	285	+	rno:315036	vacuolar protein sorting 13 homolog B (yeast)	0	Vps13b	Vacuolar protein sorting-associated protein 13B
Klhl29	-0.783247	0.581058	0.139973	649.254	1117.37	642	1130	-	rno:298867	kelch-like family member 29	0	Klhl29	Klhl29 protein
Mthfd2	0.826804	1.77375	0.140241	336.763	189.855	333	192	-	rno:680308	methylenetetrahydrofolate dehydrogenase (NADP+ dependent) 2, methenyltetrahydrofolate cyclohydrolase	0	Mthfd2	Bifunctional methylenetetrahydrofolate dehydrogenase/cyclohydrolase, mitochondrial
Pex2	0.843619	1.79455	0.140959	282.153	157.223	279	159	+	rno:29534	peroxisomal biogenesis factor 2	8e-172	Pex2	Peroxisome biogenesis factor 2
Tmem91	1.09935	2.14258	0.140982	88.9944	41.5307	88	42	-	rno:100359879	transmembrane protein 91	2e-81	Tmem91	RIKEN cDNA A830041P22, isoform CRA_d
Zfp560	-1.03518	0.487954	0.141021	52.5876	107.782	52	109	-		zinc finger protein 560	0	Zfp560	Zinc finger protein 560
Eri1	-0.841194	0.558182	0.14143	162.819	291.704	161	295	+	rno:361159	exoribonuclease 1	0	Eri1	3'-5' exoribonuclease 1
Kif24	-1.21784	0.429925	0.141521	29.3277	68.229	29	69	-	rno:313170	kinesin family member 24	0	Kif24	Kinesin-like protein KIF24
Ripk1	-0.806091	0.571929	0.142072	257.881	450.905	255	456	-	rno:306886	receptor (TNFRSF)-interacting serine-threonine kinase 1	0	Ripk1	Receptor-interacting serine/threonine-protein kinase 1
Uqcrh	0.784715	1.72275	0.142208	2040.8	1184.61	2018	1198	-	rno:366448	ubiquinol-cytochrome c reductase hinge protein	1e-40	Uqcrh	Cytochrome b-c1 complex subunit 6, mitochondrial
Odf3b	1.51722	2.86238	0.142485	42.4746	14.8324	42	15	-	rno:500917	outer dense fiber of sperm tails 3B	6e-125	Odf3b	Outer dense fiber protein 3B
LOC689100	-1.62974	0.323147	0.142604	12.1356	37.5754	12	38	-		similar to ubiquitin specific protease 12
[truncated: 12,766 more rows]
