# Supplementary material for: Comprehensive Bioinformatics Analysis Combined with Wet-Lab Experiments to Find Target Proteins of Chinese Medicine Monomer
Source: Molecules. 2022 Sep 19;27(18):6105. doi: 10.3390/molecules27186105 (PMC9504604; doi:10.3390/molecules27186105)
Supplement: Supplementary file 1 [file molecules-27-06105-s001.zip › Supplementary Table S4.xlsx]

## Sheet: Sheet1
Index	Pharmacophore	Normalized Fit Score	Name	Pharmacophore	Class	Annotation
1	4phl_2_ligand_01	0.914008	Molecule	4phl	Hydrolase	TbrPDEB1-inhibitor complex
2	3p2h_2_ligand_01-s	0.871524	Molecule	3p2h	Transferase	Crystal structure of TofI in a ternary complex with an inhibitor and MTA
3	2vrx_1_ligand_01	0.866597	Molecule	2vrx	Kinase//Serine/threonine-protein kinase//Transferase	Structure of Aurora B kinase in complex with ZM447439
4	2wmd_1_ligand_01-s	0.865911	Molecule	2wmd	No Keywords	Crystal structure of NmrA-like family domain containing protein 1 in complex with NADP and 2-(4-chloro-phenylamino)-nicotinic acid
5	4c02_1_ligand_01	0.860123	Molecule	4c02	Kinase//Receptor//Serine/threonine-protein kinase//Transferase	Crystal structure of human ACVR1 (ALK2) in complex with FKBP12.6 and dorsomorphin
6	4c02_1_ligand_01-s	0.860123	Molecule	4c02	Kinase//Receptor//Serine/threonine-protein kinase//Transferase	Crystal structure of human ACVR1 (ALK2) in complex with FKBP12.6 and dorsomorphin
7	1q9m_1_ligand_01	0.85951	Molecule	1q9m	Hydrolase	Three dimensional structures of PDE4D in complex with roliprams and implication on inhibitor selectivity
8	1eqa_1_ligand_01	0.83028	Molecule	1eqa	Elongation factor//Methyltransferase//RNA-binding//Transferase	VACCINIA METHYLTRANSFERASE VP39 MUTANT E233Q COMPLEXED WITH M7G AND S-ADENOSYLHOMOCYSTEINE
9	3r02_1_ligand_01	0.82042	Molecule	3r02	Kinase//Serine/threonine-protein kinase//Transferase	The discovery of novel benzofuran-2-carboxylic acids as potent Pim-1 inhibitors
10	2aq7_1_ligand_01	0.810248	Molecule	2aq7	Acyltransferase//Transferase	Structure-activity relationships at the 5-posiiton of thiolactomycin: an intact 5(R)-isoprene unit is required for activity against the condensing enzymes from Mycobacterium tuberculosis and Escherichia coli
11	2vb8_2_ligand_01	0.804016	Molecule	2vb8	Acyltransferase//Transferase	beta-ketoacyl-ACP synthase I (KAS) from E. coli with bound inhibitor thiolactomycin
12	2r2g_1_ligand_01-s	0.801661	Molecule	2r2g	Oxidoreductase	Structure of Eugenol Synthase from Ocimum basilicum complexed with EMDF
13	1me7_2_ligand_01	0.796369	Molecule	1me7	Oxidoreductase	Inosine Monophosphate Dehydrogenase (IMPDH) From Tritrichomonas Foetus with RVP and MOA bound
14	4i8v_3_ligand_01-s	0.794199	Molecule	4i8v	Monooxygenase//Oxidoreductase	Human Cytochrome P450 1A1 in complex with alpha-naphthoflavone
15	1bzs_1_ligand_01-s	0.786777	Molecule	1bzs	Hydrolase//Metalloprotease//Protease	CRYSTAL STRUCTURE OF MMP8 COMPLEXED WITH HMR2909
16	1bzs_1_ligand_01	0.786777	Molecule	1bzs	Hydrolase//Metalloprotease//Protease	CRYSTAL STRUCTURE OF MMP8 COMPLEXED WITH HMR2909
17	1hwl_6_ligand_01	0.784574	Molecule	1hwl	Oxidoreductase	COMPLEX OF THE CATALYTIC PORTION OF HUMAN HMG-COA REDUCTASE WITH ROSUVASTATIN (FORMALLY KNOWN AS ZD4522)
18	4h0d_2_ligand_01	0.781408	Molecule	4h0d	Hydrolase	New Delhi Metallo-beta-Lactamase-1 Complexed with Mn from Klebsiella pneumoniae
19	3w9r_1_ligand_01	0.777112	Molecule	3w9r	Protein phosphatase inhibitor//Receptor	Crystal structure of the high-affinity abscisic acid receptor PYL9/RCAR9 bound to ABA
20	1pmu_1_ligand_01-s	0.776971	Molecule	1pmu	Kinase//Serine/threonine-protein kinase//Transferase	The crystal structure of JNK3 in complex with a phenantroline inhibitor
21	4a7c_1_ligand_01	0.774289	Molecule	4a7c	Kinase//Serine/threonine-protein kinase//Transferase	Crystal structure of PIM1 kinase with ETP46546
22	1mei_2_ligand_01-s	0.770065	Molecule	1mei	Oxidoreductase	Inosine Monophosphate Dehydrogenase (IMPDH) From Tritrichomonas Foetus with XMP and mycophenolic acid bound
23	1xon_2_ligand_01	0.762623	Molecule	1xon	Hydrolase	Catalytic Domain Of Human Phosphodiesterase 4D In Complex With Piclamilast
24	2br1_1_ligand_01	0.762337	Molecule	2br1	Kinase//Serine/threonine-protein kinase//Transferase	Structure-based Design of Novel Chk1 Inhibitors: Insights into Hydrogen Bonding and Protein-Ligand Affinity
25	1tw2_2_ligand_01	0.75993	Molecule	1tw2	Methyltransferase//Transferase	Crystal structure of Carminomycin-4-O-methyltransferase (DnrK) in complex with S-adenosyl-L-homocystein (SAH) and 4-methoxy-e-rhodomycin T (M-ET)
26	2fm5_2_ligand_01	0.758796	Molecule	2fm5	Hydrolase	Crystal structure of PDE4D2 in complex with inhibitor L-869299
27	3vey_2_ligand_01-s	0.754909	Molecule	3vey	Allosteric enzyme//Kinase//Transferase	glucokinase in complex with glucose and ATPgS
28	4b7t_1_ligand_01	0.752282	Molecule	4b7t	Developmental protein//Kinase//Serine/threonine-protein kinase//Signal transduction inhibitor//Transferase	Glycogen Synthase Kinase 3 Beta complexed with Axin Peptide and Leucettine L4
29	4a7c_1_ligand_01-s	0.752043	Molecule	4a7c	Kinase//Serine/threonine-protein kinase//Transferase	Crystal structure of PIM1 kinase with ETP46546
30	1u4o_1_ligand_01	0.750984	Molecule	1u4o	Oxidoreductase	Plasmodium falciparum lactate dehydrogenase complexed with 2,6-naphthalenedicarboxylic acid
31	3qsa_2_ligand_01-s	0.750186	Molecule	3qsa	Glycosyltransferase//Transferase	Anthranilate phosphoribosyltransferase (trpD) from Mycobacterium tuberculosis (complex with inhibitor TAMU-A7)
32	1m2q_1_ligand_01	0.748525	Molecule	1m2q	Kinase//Serine/threonine-protein kinase//Transferase	Crystal structure of 1,8-di-hydroxy-4-nitro-xanten-9-one/CK2 kinase complex
33	2fm0_1_ligand_01	0.74624	Molecule	2fm0	Hydrolase	Crystal structure of PDE4D in complex with L-869298
34	3lbo_1_ligand_01-s	0.742074	Molecule	3lbo	Oxidoreductase	Human aldose reductase mutant T113C complexed with IDD594
35	3ld5_1_ligand_01-s	0.741806	Molecule	3ld5	Oxidoreductase	Human aldose reductase mutant T113S complexed with IDD594
36	3lz5_1_ligand_01-s	0.740324	Molecule	3lz5	Oxidoreductase	Human aldose reductase mutant T113V complexed with IDD594
37	2brb_1_ligand_01	0.738884	Molecule	2brb	Kinase//Serine/threonine-protein kinase//Transferase	Structure-based Design of Novel Chk1 Inhibitors: Insights into Hydrogen Bonding and Protein-Ligand Affinity
38	3ghs_1_ligand_01-s	0.738049	Molecule	3ghs	Oxidoreductase	Human aldose reductase in complex with NADP+ and the inhibitor IDD594. Investigation of global effects of radiation damage on protein structure. Second stage of radiation damage.
39	3odk_1_ligand_01	0.737775	Molecule	3odk	Isomerase//Rotamase	Discovery of cell-active phenyl-imidazole Pin1 inhibitors by structure-guided fragment evolution
40	2qxw_1_ligand_01-s	0.737443	Molecule	2qxw	Oxidoreductase	Perdeuterated alr2 in complex with idd594
41	1us0_1_ligand_01-s	0.736096	Molecule	1us0	Oxidoreductase	Human Aldose Reductase in complex with NADP+ and the inhibitor IDD594 at 0.66 Angstrom
42	5bt4_3_ligand_01	0.735399	Molecule	5bt4	Chromatin regulator	Crystal structure of BRD4 first bromodomain in complex with SGC-CBP30 chemical probe
43	3ghr_1_ligand_01-s	0.734933	Molecule	3ghr	Oxidoreductase	Human aldose reductase in complex with NADP+ and the inhibitor IDD594. Investigation of global effects of radiation damage on protein structure. First stage of radiation damage
44	2i17_1_ligand_01-s	0.733979	Molecule	2i17	Oxidoreductase	Human aldose reductase in complex with NADP+ and the inhibitor IDD594 at temperature of 60K
45	3fhx_1_ligand_01	0.733474	Molecule	3fhx	Kinase//Transferase	Crystal structure of D235A mutant of human pyridoxal kinase
46	3lql_1_ligand_01-s	0.731562	Molecule	3lql	Oxidoreductase	Human Aldose Reductase mutant T113A complexed with IDD 594
47	2i16_1_ligand_01-s	0.730229	Molecule	2i16	Oxidoreductase	Human aldose reductase in complex with NADP+ and the inhibitor IDD594 at temperature of 15K
48	3ght_1_ligand_01-s	0.730161	Molecule	3ght	Oxidoreductase	Human aldose reductase in complex with NADP+ and the inhibitor IDD594. Investigation of global effects of radiation damage on protein structure. Third stage of radiation damage.
49	4jvf_1_ligand_01	0.728564	Molecule	4jvf	No Keywords	The Crystal structure of PDE6D in complex with the inhibitor (s)-5
50	3ghu_1_ligand_01-s	0.717404	Molecule	3ghu	Oxidoreductase	Human aldose reductase in complex with NADP+ and the inhibitor IDD594. Investigation of global effects of radiation damage on protein structure. Forth stage of radiation damage.
51	1zyj_1_ligand_01	0.714983	Molecule	1zyj	Kinase//Serine/threonine-protein kinase//Transferase	Human P38 MAP Kinase in Complex with Inhibitor 1a
52	4a80_1_ligand_01-s	0.712905	Molecule	4a80	Pathogenesis-related protein	Crystal Structure of Major Birch Pollen Allergen Bet v 1 a in complex with 8-Anilinonaphthalene-1-sulfonate (ANS)
53	3sl6_4_ligand_01	0.711254	Molecule	3sl6	Hydrolase	Crystal structure of the catalytic domain of PDE4D2 with compound 12c
54	3zrl_2_ligand_01	0.710746	Molecule	3zrl	Developmental protein//Kinase//Serine/threonine-protein kinase//Signal transduction inhibitor//Transferase	Identification of 2-(4-pyridyl)thienopyridinones as GSK-3beta inhibitors
55	3ma3_1_ligand_01	0.710082	Molecule	3ma3	Kinase//Serine/threonine-protein kinase//Transferase	Crystal structure of human proto-oncogene serine threonine kinase (PIM1) in complex with a consensus peptide and a naphtho-difuran ligand
56	3rfm_1_ligand_01	0.708758	Molecule	3rfm	G-protein coupled receptor//Receptor//Transducer	Thermostabilised adenosine A2A receptor in complex with caffeine
57	2bxe_2_ligand_01	0.707401	Molecule	2bxe	DNA-binding//Antioxidant	Human serum albumin complexed with diflunisal
58	2wm3_1_ligand_01-s	0.706834	Molecule	2wm3	No Keywords	Crystal structure of NmrA-like family domain containing protein 1 in complex with niflumic acid
59	4i5x_1_ligand_01	0.703956	Molecule	4i5x	Oxidoreductase	Crystal Structure Of AKR1B10 Complexed With NADP+ And Flufenamic acid
60	3p2h_2_ligand_01	0.703331	Molecule	3p2h	Transferase	Crystal structure of TofI in a ternary complex with an inhibitor and MTA
61	3lpb_2_ligand_01	0.700059	Molecule	3lpb	Chromatin regulator//Kinase//Transferase//Tyrosine-protein kinase	Crystal structure of Jak2 complexed with a potent 2,8-diaryl-quinoxaline inhibitor
62	2ft9_2_ligand_01	0.697721	Molecule	2ft9	No Keywords	Crystal structure of axolotl (Ambystoma mexicanum) liver bile acid-binding protein bound to cholic acid
63	3pm0_1_ligand_01-s	0.688223	Molecule	3pm0	Monooxygenase//Oxidoreductase	Structural Characterization of the Complex between Alpha-Naphthoflavone and Human Cytochrome P450 1B1 (CYP1B1)
64	1n4s_4_ligand_01	0.686366	Molecule	1n4s	Prenyltransferase//Transferase	Protein Geranylgeranyltransferase type-I Complexed with GGPP and a Geranylgeranylated KKKSKTKCVIL Peptide Product
65	1yvf_1_ligand_01	0.685606	Molecule	1yvf	Helicase//Hydrolase//Nucleotidyltransferase//Protease//RNA-directed RNA polymerase//Thiol protease//Transferase	Hepatitis C virus NS5B RNA-dependent RNA polymerase complex with inhibitor PHA-00729145
66	4h9t_1_ligand_01	0.683401	Molecule	4h9t	Hydrolase	Structure of Geobacillus kaustophilus lactonase, mutant E101N with bound N-butyryl-DL-homoserine lactone
67	3m50_1_ligand_01	0.68313	Molecule	3m50	No Keywords//Hydrolase	Structure of the 14-3-3/PMA2 complex stabilized by Epibestatin
68	1n5v_1_ligand_01-s	0.680352	Molecule	1n5v	No Keywords	Crystal structure of a Monooxygenase from the gene ActVA-Orf6 of Streptomyces coelicolor in complex with the ligand Nanaomycin D
69	4do3_1_ligand_01	0.678927	Molecule	4do3	Hydrolase	Structure of FAAH with a non-steroidal anti-inflammatory drug
70	2hu4_4_ligand_01	0.678453	Molecule	2hu4	Glycosidase//Hydrolase	N1 neuraminidase in complex with oseltamivir 2
71	3gnq_4_ligand_01	0.678049	Molecule	3gnq	Oxidoreductase	Crystal structure of glyceraldehyde-3-phosphate dehydrogenase, type I from Burkholderia pseudomallei
72	4cgd_2_ligand_01	0.677923	Molecule	4cgd	DNA-binding//Endonuclease//Hydrolase//Multifunctional enzyme//Nuclease//Nucleotidyltransferase//RNA-directed DNA polymerase//Transferase	Interrogating HIV integrase for compounds that bind- a SAMPL challenge
73	1n5v_1_ligand_01	0.677733	Molecule	1n5v	No Keywords	Crystal structure of a Monooxygenase from the gene ActVA-Orf6 of Streptomyces coelicolor in complex with the ligand Nanaomycin D
74	1nfy_1_ligand_01	0.675976	Molecule	1nfy	Hydrolase//Protease//Serine protease	CRYSTAL STRUCTURE OF HUMAN COAGULATION FACTOR XA COMPLEXED WITH RPR200095
75	3g4k_2_ligand_01	0.674653	Molecule	3g4k	Hydrolase	Crystal structure of human phosphodiesterase 4d with rolipram
76	2wo9_3_ligand_01	0.668285	Molecule	2wo9	Hydrolase//Metalloprotease//Protease	MMP12 complex with a beta hydroxy carboxylic acid
77	1mei_2_ligand_01	0.663376	Molecule	1mei	Oxidoreductase	Inosine Monophosphate Dehydrogenase (IMPDH) From Tritrichomonas Foetus with XMP and mycophenolic acid bound
78	3p3z_1_ligand_01	0.662458	Molecule	3p3z	Monooxygenase//Oxidoreductase	Crystal Structure of the Cytochrome P450 Monooxygenase AurH from Streptomyces Thioluteus in Complex with Ancymidol
79	4a86_1_ligand_01-s	0.661632	Molecule	4a86	Pathogenesis-related protein	Crystal Structure of Major Birch Pollen Allergen Bet v 1 a in ternary complex with kinetin and 8-Anilinonaphthalene-1-sulfonate (ANS)
80	3kdj_1_ligand_01	0.656188	Molecule	3kdj	Protein phosphatase inhibitor//Receptor	Complex structure of (+)-ABA-bound PYL1 and ABI1
81	4c71_2_ligand_01-s	0.654905	Molecule	4c71	Acyltransferase//Transferase	Crystal structure of M. tuberculosis C171Q KasA in complex with TLM18
82	3ufy_1_ligand_01	0.652893	Molecule	3ufy	Oxidoreductase	AKR1C3 complex with R-naproxen
83	1pmu_1_ligand_01	0.650396	Molecule	1pmu	Kinase//Serine/threonine-protein kinase//Transferase	The crystal structure of JNK3 in complex with a phenantroline inhibitor
84	3r6p_1_ligand_01	0.649683	Molecule	3r6p	Protein phosphatase inhibitor//Receptor	Crystal structure of abscisic acid-bound PYL10
85	2gfk_2_ligand_01	0.649469	Molecule	2gfk	Hydrolase	Crystal structure of the zinc-beta-lactamase l1 from stenotrophomonas maltophilia (inhibitor 2)
86	4hxs_1_ligand_01	0.649364	Molecule	4hxs	Chromatin regulator	Brd4 Bromodomain 1 complex with N-[3-(2-OXO-2,3-DIHYDRO-1,3-THIAZOL-4-YL)PHENYL]-1-PHENYLMETHANESULFONAMIDE inhibitor
87	4hxs_1_ligand_01-s	0.649364	Molecule	4hxs	Chromatin regulator	Brd4 Bromodomain 1 complex with N-[3-(2-OXO-2,3-DIHYDRO-1,3-THIAZOL-4-YL)PHENYL]-1-PHENYLMETHANESULFONAMIDE inhibitor
88	2f7e_1_ligand_01-s	0.649325	Molecule	2f7e	Kinase//Serine/threonine-protein kinase//Transferase	PKA complexed with (S)-2-(1H-Indol-3-yl)-1-(5-isoquinolin-6-yl-pyridin-3-yloxymethyl-etylamine
89	1yci_1_ligand_01	0.64888	Molecule	1yci	Dioxygenase//Oxidoreductase	Factor inhibiting HIF-1 alpha in complex with N-(carboxycarbonyl)-D-phenylalanine
90	2pdn_1_ligand_01-s	0.637263	Molecule	2pdn	Oxidoreductase	Human aldose reductase mutant S302R complexed with uracil-type inhibitor.
91	2brb_1_ligand_01-s	0.635182	Molecule	2brb	Kinase//Serine/threonine-protein kinase//Transferase	Structure-based Design of Novel Chk1 Inhibitors: Insights into Hydrogen Bonding and Protein-Ligand Affinity
92	2qe5_1_ligand_01-s	0.633288	Molecule	2qe5	Helicase//Hydrolase//Nucleotidyltransferase//Protease//RNA-directed RNA polymerase//Thiol protease//Transferase	Structure of HCV NS5B Bound to an Anthranilic Acid Inhibitor
93	4i0z_1_ligand_01	0.631845	Molecule	4i0z	Aspartyl protease//Hydrolase//Protease	Structure-based design of novel dihydroisoquinoline BACE-1 inhibitors that do not engage the catalytic aspartates
94	2chw_1_ligand_01	0.631763	Molecule	2chw	Kinase//Serine/threonine-protein kinase//Transferase	A pharmacological map of the PI3-K family defines a role for p110 alpha in signaling: The structure of complex of phosphoinositide 3- kinase gamma with inhibitor PIK-39
95	3q7f_1_ligand_01	0.631746	Molecule	3q7f	No Keywords	Cryptococcus neoformans protein farnesyltransferase in complex with FPP and ethylenediamine inhibitor 1
96	2b52_1_ligand_01	0.630815	Molecule	2b52	Kinase//Serine/threonine-protein kinase//Transferase	Human cyclin dependent kinase 2 (CDK2) complexed with DPH-042562
97	1mkd_5_ligand_01	0.630134	Molecule	1mkd	Hydrolase	crystal structure of PDE4D catalytic domain and zardaverine complex
98	2nsd_1_ligand_01-s	0.629946	Molecule	2nsd	Oxidoreductase	Enoyl acyl carrier protein reductase InhA in complex with N-(4-methylbenzoyl)-4-benzylpiperidine
99	1me7_2_ligand_01-s	0.628299	Molecule	1me7	Oxidoreductase	Inosine Monophosphate Dehydrogenase (IMPDH) From Tritrichomonas Foetus with RVP and MOA bound
100	4b7t_1_ligand_01-s	0.628178	Molecule	4b7t	Developmental protein//Kinase//Serine/threonine-protein kinase//Signal transduction inhibitor//Transferase	Glycogen Synthase Kinase 3 Beta complexed with Axin Peptide and Leucettine L4
101	2pdg_1_ligand_01-s	0.626967	Molecule	2pdg	Oxidoreductase	Human aldose reductase with uracil-type inhibitor at 1.42A.
102	4g8b_1_ligand_01	0.626947	Molecule	4g8b	Hydrolase	Crystal structures of N-acyl homoserine lactonase AidH S102G mutant complexed with N-hexanoyl homoserine lactone
103	3fl5_1_ligand_01	0.626302	Molecule	3fl5	Kinase//Serine/threonine-protein kinase//Transferase	Protein kinase CK2 in complex with the inhibitor Quinalizarin
104	1zzl_1_ligand_01	0.625131	Molecule	1zzl	Kinase//Serine/threonine-protein kinase//Transferase	Crystal structure of P38 with triazolopyridine
105	4mr4_1_ligand_01	0.624852	Molecule	4mr4	Chromatin regulator	Crystal Structure of the first bromodomain of human BRD4 in complex with a quinazolinone ligand (RVX-208)
106	3dol_1_ligand_01	0.623629	Molecule	3dol	Aspartyl protease//DNA-binding//Endonuclease//Hydrolase//Multifunctional enzyme//Nuclease//Nucleotidyltransferase//Protease//RNA-directed DNA polymerase//Transferase	Crystal structure of L100I mutant HIV-1 reverse transcriptase in complex with GW695634.
107	4de1_1_ligand_01-s	0.622019	Molecule	4de1	Hydrolase	CTX-M-9 class A beta-lactamase complexed with compound 18
108	4de1_1_ligand_01	0.622019	Molecule	4de1	Hydrolase	CTX-M-9 class A beta-lactamase complexed with compound 18
109	3t40_1_ligand_01	0.620978	Molecule	3t40	Decarboxylase//Lyase	Crystal Structure of Mycobacterium tuberculosis Indole Glycerol Phosphate Synthase (IGPS) complex with N-2-Carboxyphenyl Glycine (CPG)
110	1xor_1_ligand_01	0.62045	Molecule	1xor	Hydrolase	Catalytic Domain Of Human Phosphodiesterase 4D In Complex With Zardaverine
111	1m2q_1_ligand_01-s	0.620377	Molecule	1m2q	Kinase//Serine/threonine-protein kinase//Transferase	Crystal structure of 1,8-di-hydroxy-4-nitro-xanten-9-one/CK2 kinase complex
112	3g1o_1_ligand_01-s	0.620275	Molecule	3g1o	DNA-binding//Repressor	EthR from Mycobacterium tuberculosis in complex with compound BDM14500
113	1oky_1_ligand_01	0.618567	Molecule	1oky	Activator//Kinase//Serine/threonine-protein kinase//Transferase	Structure of human PDK1 kinase domain in complex with staurosporine
114	2is7_1_ligand_01	0.617236	Molecule	2is7	Oxidoreductase	Crystal Structure of Aldose Reductase complexed with Dichlorophenylacetic acid
115	2f7e_1_ligand_01	0.616858	Molecule	2f7e	Kinase//Serine/threonine-protein kinase//Transferase	PKA complexed with (S)-2-(1H-Indol-3-yl)-1-(5-isoquinolin-6-yl-pyridin-3-yloxymethyl-etylamine
116	2gfk_2_ligand_01-s	0.616282	Molecule	2gfk	Hydrolase	Crystal structure of the zinc-beta-lactamase l1 from stenotrophomonas maltophilia (inhibitor 2)
117	1tv5_1_ligand_01-s	0.613106	Molecule	1tv5	Oxidoreductase	Plasmodium falciparum dihydroorotate dehydrogenase with a bound inhibitor
118	5c1m_1_ligand_01	0.61209	Molecule	5c1m	G-protein coupled receptor//Receptor//Transducer	Crystal structure of active mu-opioid receptor bound to the agonist BU72
119	4zs2_1_ligand_01	0.609819	Molecule	4zs2	Dioxygenase//Oxidoreductase	Structural complex of FTO/fluorescein
120	4i5x_1_ligand_01-s	0.609416	Molecule	4i5x	Oxidoreductase	Crystal Structure Of AKR1B10 Complexed With NADP+ And Flufenamic acid
121	2gz8_1_ligand_01	0.608246	Molecule	2gz8	Hydrolase//Protease//RNA-binding//Thiol protease	Structure-Based Drug Design and Structural Biology Study of Novel Nonpeptide Inhibitors of SARS-CoV Main Protease
122	4e4q_1_ligand_01	0.604991	Molecule	4e4q	Activator//DNA-binding//Receptor	Crystal structure of PPARgamma with the ligand FS214
123	5ccy_1_ligand_01	0.604909	Molecule	5ccy	Endonuclease//Hydrolase//Nuclease	2009 H1N1 PA endonuclease in complex with dTMP
124	4v26_1_ligand_01	0.604772	Molecule	4v26	Kinase//Transferase	VER-246608, a novel pan-isoform ATP competitive inhibitor of pyruvate dehydrogenase kinase, disrupts Warburg metabolism and induces context- dependent cytostasis in cancer cells
125	2wmd_1_ligand_01	0.60288	Molecule	2wmd	No Keywords	Crystal structure of NmrA-like family domain containing protein 1 in complex with NADP and 2-(4-chloro-phenylamino)-nicotinic acid
126	2c9z_1_ligand_01-s	0.602645	Molecule	2c9z	Glycosyltransferase//Transferase	Structure and activity of a flavonoid 3-0 glucosyltransferase reveals the basis for plant natural product modification
127	3oqu_2_ligand_01	0.59856	Molecule	3oqu	Protein phosphatase inhibitor//Receptor	Crystal structure of native abscisic acid receptor PYL9 with ABA
128	2obj_1_ligand_01	0.5979	Molecule	2obj	Kinase//Serine/threonine-protein kinase//Transferase	Crystal structure of human PIM-1 Kinase in complex with inhibitor
129	4i23_1_ligand_01	0.596602	Molecule	4i23	Developmental protein//Host cell receptor for virus entry//Kinase//Receptor//Transferase//Tyrosine-protein kinase	Crystal structure of the wild-type EGFR kinase domain in complex with dacomitinib (soaked)
130	4oic_1_ligand_01	0.596322	Molecule	4oic	Protein phosphatase inhibitor//Receptor	Crystal structrual of a soluble protein
131	3ugr_1_ligand_01	0.595431	Molecule	3ugr	Oxidoreductase	AKR1C3 complex with indomethacin at pH 6.8
132	3fz1_1_ligand_01	0.591249	Molecule	3fz1	Kinase//Serine/threonine-protein kinase//Transferase	Crystal structure of a benzthiophene inhibitor bound to human Cyclin-dependent Kinase-2 (CDK-2)
133	2ipw_1_ligand_01	0.588098	Molecule	2ipw	Oxidoreductase	Crystal Structure of C298A W219Y Aldose Reductase complexed with Dichlorophenylacetic acid
134	4meo_1_ligand_01	0.588079	Molecule	4meo	Chromatin regulator	Crystal Structure of the first bromodomain of human BRD4 in complex with a 2-methyl-quinoline ligand
135	1zoy_1_ligand_01	0.586672	Molecule	1zoy	Oxidoreductase//No Keywords	Crystal Structure of Mitochondrial Respiratory Complex II from porcine heart at 2.4 Angstroms
136	2rht_1_ligand_01	0.586512	Molecule	2rht	Hydrolase	Crystal Structure of the S112A mutant of a C-C hydrolase, BphD from Burkholderia xenovorans LB400, in complex with 3-Cl HOPDA
137	1gg5_2_ligand_01-s	0.586474	Molecule	1gg5	Oxidoreductase	CRYSTAL STRUCTURE OF A COMPLEX OF HUMAN NAD[P]H-QUINONE OXIDOREDUCTASE AND A CHEMOTHERAPEUTIC DRUG (E09) AT 2.5 A RESOLUTION
138	2oyf_1_ligand_01	0.581765	Molecule	2oyf	Blood coagulation cascade inhibiting toxin//Hemostasis impairing toxin//Hydrolase//Myotoxin//Neurotoxin//Presynaptic neurotoxin//Toxin	Crystal Structure of the complex of phospholipase A2 with indole acetic acid at 1.2 A resolution
139	3zrl_2_ligand_01-s	0.579169	Molecule	3zrl	Developmental protein//Kinase//Serine/threonine-protein kinase//Signal transduction inhibitor//Transferase	Identification of 2-(4-pyridyl)thienopyridinones as GSK-3beta inhibitors
140	2qd9_1_ligand_01	0.577108	Molecule	2qd9	Kinase//Serine/threonine-protein kinase//Transferase	P38 Alpha Map Kinase inhibitor based on heterobicyclic scaffolds
141	3tl1_1_ligand_01	0.574011	Molecule	3tl1	No Keywords	Crystal structure of the Streptomyces coelicolor WhiE ORFVI polyketide aromatase/cyclase
142	4bw4_1_ligand_01	0.573315	Molecule	4bw4	Chromatin regulator	The first bromodomain of human BRD4 in complex with 3,5 dimethylisoxaxole ligand
143	2c9z_1_ligand_01	0.572026	Molecule	2c9z	Glycosyltransferase//Transferase	Structure and activity of a flavonoid 3-0 glucosyltransferase reveals the basis for plant natural product modification
144	1jjt_1_ligand_01	0.569408	Molecule	1jjt	Hydrolase	IMP-1 METALLO BETA-LACTAMASE FROM PSEUDOMONAS AERUGINOSA IN COMPLEX WITH A BIARYL SUCCINIC ACID INHIBITOR (1)
145	3pm0_1_ligand_01	0.567975	Molecule	3pm0	Monooxygenase//Oxidoreductase	Structural Characterization of the Complex between Alpha-Naphthoflavone and Human Cytochrome P450 1B1 (CYP1B1)
146	2r9w_1_ligand_01	0.567356	Molecule	2r9w	Hydrolase	AmpC beta-lactamase with bound Phthalamide inhibitor
147	4n16_1_ligand_01	0.565867	Molecule	4n16	Lyase	Structure of cholate bound to human carbonic anhydrase II
148	2pdx_1_ligand_01	0.56372	Molecule	2pdx	Oxidoreductase	Human aldose reductase double mutant S302R-C303D complexed with zopolrestat.
149	4fal_1_ligand_01	0.561752	Molecule	4fal	Oxidoreductase	Crystal structure of human 17beta-hydroxysteroid dehydrogenase type 5 in complex with 3-((3,4-dihydroisoquinolin-2(1H)-yl)sulfonyl)-N-methylbenzamide (80)
150	4fal_1_ligand_01-s	0.561752	Molecule	4fal	Oxidoreductase	Crystal structure of human 17beta-hydroxysteroid dehydrogenase type 5 in complex with 3-((3,4-dihydroisoquinolin-2(1H)-yl)sulfonyl)-N-methylbenzamide (80)
151	2ovv_1_ligand_01	0.561211	Molecule	2ovv	Allosteric enzyme//Hydrolase	Crystal structure of the catalytic domain of rat phosphodiesterase 10A
152	3f7z_2_ligand_01	0.556903	Molecule	3f7z	Developmental protein//Kinase//Serine/threonine-protein kinase//Signal transduction inhibitor//Transferase	X-ray Co-Crystal Structure of Glycogen Synthase Kinase 3beta in Complex with an Inhibitor
153	4avl_4_ligand_01	0.555965	Molecule	4avl	Endonuclease//Hydrolase//Nuclease	Influenza strain pH1N1 2009 polymerase subunit PA endonuclease in complex with dTMP
154	4raw_1_ligand_01	0.553784	Molecule	4raw	Hydrolase	Crystal Structure of New Delhi Metallo-beta-Lactamase-1 Mutant M67V Complexed with Hydrolyzed Ampicillin
155	4e5j_4_ligand_01-s	0.551918	Molecule	4e5j	Endonuclease//Hydrolase//Nuclease	Crystal structure of avian influenza virus PAn bound to compound 5
156	4fa3_1_ligand_01-s	0.55107	Molecule	4fa3	Oxidoreductase	Crystal structure of human 17beta-hydroxysteroid dehydrogenase type 5 in complex with (R)-1-(naphthalen-2-ylsulfonyl)piperidine-3-carboxylic acid (86)
157	2ovy_1_ligand_01	0.547748	Molecule	2ovy	Allosteric enzyme//Hydrolase	Crystal structure of the catalytic domain of rat phosphodiesterase 10A
158	4hby_1_ligand_01	0.547002	Molecule	4hby	Chromatin regulator	Crystal Structure of the first bromodomain of human BRD4 in complex with a quinazolin ligand
159	4hby_1_ligand_01-s	0.546774	Molecule	4hby	Chromatin regulator	Crystal Structure of the first bromodomain of human BRD4 in complex with a quinazolin ligand
160	3qsa_2_ligand_01	0.54481	Molecule	3qsa	Glycosyltransferase//Transferase	Anthranilate phosphoribosyltransferase (trpD) from Mycobacterium tuberculosis (complex with inhibitor TAMU-A7)
161	4i8v_3_ligand_01	0.542772	Molecule	4i8v	Monooxygenase//Oxidoreductase	Human Cytochrome P450 1A1 in complex with alpha-naphthoflavone
162	3cv7_1_ligand_01	0.541153	Molecule	3cv7	Oxidoreductase	Crystal structure of porcine aldehyde reductase ternary complex
163	4cgd_2_ligand_01-s	0.540804	Molecule	4cgd	DNA-binding//Endonuclease//Hydrolase//Multifunctional enzyme//Nuclease//Nucleotidyltransferase//RNA-directed DNA polymerase//Transferase	Interrogating HIV integrase for compounds that bind- a SAMPL challenge
164	2q5o_5_ligand_01	0.53846	Molecule	2q5o	Decarboxylase//Lyase	X-ray structure of phenylpyruvate decarboxylase in complex with 3-deaza-ThDP and phenylpyruvate
165	4b11_5_ligand_01	0.537364	Molecule	4b11	Acyltransferase//Transferase	Plasmodium vivax N-myristoyltransferase with a bound benzofuran inhibitor (compound 13)
166	3ime_2_ligand_01	0.532609	Molecule	3ime	Ligase	Crystal Structure of Mycobacterium Tuberculosis Pantothenate Synthetase at 2.40 Ang resolution in complex with fragment compound 1-Benzofuran-2-carboxylic acid
167	3nju_1_ligand_01	0.532449	Molecule	3nju	Hydrolase	Crystal structure of the complex of group I phospholipase A2 with 4-Methoxy-benzoicacid at 1.4A resolution
168	4btu_2_ligand_01	0.528523	Molecule	4btu	Hydrolase//Protease//Serine protease	Factor Xa in complex with the dual thrombin-FXa inhibitor 57.
169	4jey_1_ligand_01	0.526353	Molecule	4jey	Aminotransferase//Transferase	E198A mutant of N-acetylornithine aminotransferase from Salmonella typhimurium
170	2iqd_1_ligand_01	0.526148	Molecule	2iqd	Oxidoreductase	Crystal Structure of Aldose Reductase complexed with Lipoic Acid
171	3myt_1_ligand_01	0.526078	Molecule	3myt	Isomerase	Crystal structure of Ketosteroid Isomerase D38HD99N from Pseudomonas testosteroni (tKSI)
172	2qo4_1_ligand_01	0.516375	Molecule	2qo4	No Keywords	Crystal structure of zebrafish liver bile acid-binding protein complexed with cholic acid
173	2pdg_1_ligand_01	0.514958	Molecule	2pdg	Oxidoreductase	Human aldose reductase with uracil-type inhibitor at 1.42A.
174	3r04_1_ligand_01	0.514507	Molecule	3r04	Kinase//Serine/threonine-protein kinase//Transferase	The discovery of novel benzofuran-2-carboxylic acids as potent Pim-1 inhibitors
175	2qs4_1_ligand_01	0.512158	Molecule	2qs4	Ion channel//Ligand-gated ion channel//Receptor	Crystal structure of the GluR5 ligand binding core dimer in complex with LY466195 at 1.58 Angstroms resolution
176	1t9c_3_ligand_01	0.510609	Molecule	1t9c	Transferase	Crystal Structure Of Yeast Acetohydroxyacid Synthase In Complex With A Sulfonylurea Herbicide, Sulfometuron methyl
177	4c73_1_ligand_01-s	0.508109	Molecule	4c73	Acyltransferase//Transferase	Crystal structure of M. tuberculosis C171Q KasA in complex with TLM6
178	4ajw_1_ligand_01	0.507769	Molecule	4ajw	Kinase//Transferase	Discovery and Optimization of New Benzimidazole- and Benzoxazole-Pyrimidone Selective PI3KBeta Inhibitors for the Treatment of Phosphatase and TENsin homologue (PTEN)-Deficient Cancers
179	2o3z_2_ligand_01	0.506821	Molecule	2o3z	Hydrolase	X-ray crystal structure of LpxC complexed with 3-heptyloxybenzoate
180	1yi3_1_ligand_01	0.505332	Molecule	1yi3	Kinase//Serine/threonine-protein kinase//Transferase	Crystal Structure of Pim-1 bound to LY294002
181	4dbw_3_ligand_01	0.505154	Molecule	4dbw	Oxidoreductase	Crystal structure of human 17beta-hydroxysteroid dehydrogenase type 5 (AKR1C3) in complex with NADP+ and 2'-desmethyl-indomethacin
183	3rox_1_ligand_01	0.503701	Molecule	3rox	Isomerase	Crystal Structure of Mouse Apolipoprotein A-I Binding Protein in Complex with Theophylline
184	4a9n_2_ligand_01	0.502935	Molecule	4a9n	Chromatin regulator	N-TERMINAL BROMODOMAIN OF HUMAN BRD2 WITH N-cyclopropyl-5-(3,5- dimethyl-1,2-oxazol-4-yl)-2-methylbenzene-1-sulfonamide
185	4zm3_4_ligand_01	0.502406	Molecule	4zm3	Aminotransferase//Transferase	Crystal structure of PLP-Dependent 3-Aminobenzoate Synthase PctV wild-type
186	3vax_1_ligand_01	0.502377	Molecule	3vax	No Keywords	Crystal structure of DndA from streptomyces lividans
187	4ajd_1_ligand_01	0.501912	Molecule	4ajd	Allosteric enzyme//Hydrolase	Identification and structural characterization of PDE10 fragment inhibitors
188	4jin_1_ligand_01-s	0.50128	Molecule	4jin	Hydrolase//Kinase//Serine/threonine-protein kinase//Transferase	X-ray crystal structure of Archaeoglobus fulgidus Rio1 bound to (2E)-N-benzyl-2-cyano-3-(pyridine-4-yl)acrylamide (WP1086)
189	4jin_1_ligand_01	0.50128	Molecule	4jin	Hydrolase//Kinase//Serine/threonine-protein kinase//Transferase	X-ray crystal structure of Archaeoglobus fulgidus Rio1 bound to (2E)-N-benzyl-2-cyano-3-(pyridine-4-yl)acrylamide (WP1086)
190	3vvp_1_ligand_01-s	0.50057	Molecule	3vvp	No Keywords	Crystal structure of MATE in complex with Br-NRF
191	4z0u_1_ligand_01	0.500324	Molecule	4z0u	Endonuclease//Hydrolase//Nuclease	RNase HI/SSB-Ct complex
192	3oom_1_ligand_01	0.499956	Molecule	3oom	Kinase//Receptor//Serine/threonine-protein kinase//Transferase	Crystal structure of the ACVR1 kinase domain in complex with the imidazo[1,2-b]pyridazine inhibitor K00507
193	2r2g_1_ligand_01	0.498186	Molecule	2r2g	Oxidoreductase	Structure of Eugenol Synthase from Ocimum basilicum complexed with EMDF
194	4cje_1_ligand_01	0.496811	Molecule	4cje	DNA-binding//Endonuclease//Hydrolase//Multifunctional enzyme//Nuclease//Nucleotidyltransferase//RNA-directed DNA polymerase//Transferase	Interrogating HIV integrase for compounds that bind- a SAMPL challenge
195	4i22_1_ligand_01	0.496056	Molecule	4i22	Developmental protein//Host cell receptor for virus entry//Kinase//Receptor//Transferase//Tyrosine-protein kinase	Structure of the monomeric (V948R)gefitinib/erlotinib resistant double mutant (L858R+T790M) EGFR kinase domain co-crystallized with gefitinib
196	1fki_2_ligand_01	0.494575	Molecule	1fki	Isomerase//Rotamase	DESIGN, SYNTHESIS, AND KINETIC EVALUATION OF HIGH-AFFINITY FKBP LIGANDS, AND THE X-RAY CRYSTAL STRUCTURES OF THEIR COMPLEXES WITH FKBP12
197	3m50_1_ligand_01-s	0.49287	Molecule	3m50	No Keywords//Hydrolase	Structure of the 14-3-3/PMA2 complex stabilized by Epibestatin
198	3v49_1_ligand_01-s	0.492048	Molecule	3v49	Activator//DNA-binding//Receptor	Structure of ar lbd with activator peptide and sarm inhibitor 1
199	2qe5_1_ligand_01	0.49127	Molecule	2qe5	Helicase//Hydrolase//Nucleotidyltransferase//Protease//RNA-directed RNA polymerase//Thiol protease//Transferase	Structure of HCV NS5B Bound to an Anthranilic Acid Inhibitor
200	4dbs_4_ligand_01-s	0.491224	Molecule	4dbs	Oxidoreductase	Crystal structure of human 17beta-hydroxysteroid dehydrogenase type 5 (AKR1C3) in complex with NADP+ and 3'-[(4-nitronaphthalen-1-yl)amino]benzoic acid
201	3iis_3_ligand_01	0.491074	Molecule	3iis	Light-harvesting polypeptide	Structure of the reconstituted Peridinin-Chlorophyll a-Protein (RFPCP)
202	3ufy_1_ligand_01-s	0.491063	Molecule	3ufy	Oxidoreductase	AKR1C3 complex with R-naproxen
203	3uyk_1_ligand_01	0.490087	Molecule	3uyk	Transferase	Spinosyn Rhamnosyltransferase SpnG complexed with spinosyn aglycone
204	3g5e_1_ligand_01-s	0.487282	Molecule	3g5e	Oxidoreductase	Human aldose reductase complexed with IDD 740 inhibitor
205	2aq7_1_ligand_01-s	0.486323	Molecule	2aq7	Acyltransferase//Transferase	Structure-activity relationships at the 5-posiiton of thiolactomycin: an intact 5(R)-isoprene unit is required for activity against the condensing enzymes from Mycobacterium tuberculosis and Escherichia coli
206	3lql_1_ligand_01	0.486192	Molecule	3lql	Oxidoreductase	Human Aldose Reductase mutant T113A complexed with IDD 594
207	2pdn_1_ligand_01	0.485551	Molecule	2pdn	Oxidoreductase	Human aldose reductase mutant S302R complexed with uracil-type inhibitor.
208	4h7c_1_ligand_01	0.485225	Molecule	4h7c	Oxidoreductase	Crystal structure of human 17beta-hydroxysteroid dehydrogenase type 5 in complex with 1-{4-[(2-methyl-1-piperidinyl)sulfonyl]phenyl}-2-pyrrolidinone
209	1nhv_1_ligand_01	0.484333	Molecule	1nhv	Helicase//Hydrolase//Ion channel//Multifunctional enzyme//Nucleotidyltransferase//Protease//Ribonucleoprotein//RNA-binding//RNA-directed RNA polymerase//Serine protease//Thiol protease//Transferase//Viral ion channel//Viral nucleoprotein	Hepatitis C virus RNA polymerase in complex with non-nucleoside analogue inhibitor
210	2ayl_2_ligand_01	0.483062	Molecule	2ayl	Dioxygenase//Oxidoreductase//Peroxidase	2.0 Angstrom Crystal Structure of Manganese Protoporphyrin IX-reconstituted Ovine Prostaglandin H2 Synthase-1 Complexed With Flurbiprofen
211	2b96_1_ligand_01	0.481503	Molecule	2b96	Hydrolase	Third Calcium ion found in an inhibitor bound phospholipase A2
212	2oli_1_ligand_01	0.480767	Molecule	2oli	Blood coagulation cascade inhibiting toxin//Hemostasis impairing toxin//Hydrolase//Myotoxin//Neurotoxin//Presynaptic neurotoxin//Toxin	Crystal structure of the complex formed between a group II phospholipase A2 and an indole derivative at 2.2 A resolution
213	2jh6_1_ligand_01	0.480714	Molecule	2jh6	Hydrolase//Protease//Serine protease	Human Thrombin Hirugen Inhibitor complex
214	2bu7_1_ligand_01	0.478891	Molecule	2bu7	Kinase//Transferase	crystal structures of human pyruvate dehydrogenase kinase 2 containing physiological and synthetic ligands
215	2l1r_1_ligand_01	0.47826	Molecule	2l1r	Muscle protein	The structure of the calcium-sensitizer, dfbp-o, in complex with the N-domain of troponin C and the switch region of troponin I
216	2pdq_1_ligand_01-s	0.478256	Molecule	2pdq	Oxidoreductase	Human aldose reductase mutant C303D complexed with uracil-type inhibitor.
217	1o2e_1_ligand_01	0.478214	Molecule	1o2e	Hydrolase	Structure of the triple mutant (K53,56,120M) + Anisic acid complex of phospholipase A2
218	3zvu_1_ligand_01	0.478165	Molecule	3zvu	Protein phosphatase inhibitor//Receptor	Structure of the PYR1 His60Pro mutant in complex with the HAB1 phosphatase and Abscisic acid
219	3g49_2_ligand_01	0.477532	Molecule	3g49	Oxidoreductase	N-(Pyridin-2-yl) Arylsulfonamide Inhibitors of 11b-Hydroxysteroid Dehydrogenase Type 1: Discovery of PF-915275
220	2ilt_1_ligand_01	0.475345	Molecule	2ilt	Oxidoreductase	Human 11-beta-Hydroxysteroid Dehydrogenase (HSD1) with NADP and Adamantane Sulfone Inhibitor
221	4ehv_1_ligand_01	0.475087	Molecule	4ehv	Kinase//Serine/threonine-protein kinase//Transferase	Human p38 MAP kinase in complex with NP-F10 and RL87
222	4a80_1_ligand_01	0.474784	Molecule	4a80	Pathogenesis-related protein	Crystal Structure of Major Birch Pollen Allergen Bet v 1 a in complex with 8-Anilinonaphthalene-1-sulfonate (ANS)
223	2x1z_3_ligand_01	0.474196	Molecule	2x1z	Light-harvesting polypeptide	Structure of Peridinin-Chlorophyll-Protein reconstituted with Chl-d
224	1hwl_6_ligand_01-s	0.474145	Molecule	1hwl	Oxidoreductase	COMPLEX OF THE CATALYTIC PORTION OF HUMAN HMG-COA REDUCTASE WITH ROSUVASTATIN (FORMALLY KNOWN AS ZD4522)
225	2q93_1_ligand_01	0.472427	Molecule	2q93	Aminopeptidase//Hydrolase//Protease	E. coli methionine aminopeptidase Mn-form with inhibitor B21
226	1odn_1_ligand_01	0.471952	Molecule	1odn	Oxidoreductase	ISOPENICILLIN N SYNTHASE FROM ASPERGILLUS NIDULANS (OXYGEN-EXPOSED PRODUCT FROM ANAEROBIC AC-VINYLGLYCINE FE COMPLEX)
227	4em9_1_ligand_01	0.470946	Molecule	4em9	Activator//DNA-binding//Receptor	Human PPAR gamma in complex with nonanoic acids
228	4i8x_3_ligand_01	0.470097	Molecule	4i8x	Oxidoreductase	Crystal structure of rabbit LDHA in complex with AP27460
229	2zdu_1_ligand_01	0.468896	Molecule	2zdu	Kinase//Serine/threonine-protein kinase//Transferase	Crystal Structure of human JNK3 complexed with an isoquinolone inhibitor
230	4lxl_1_ligand_01	0.46792	Molecule	4lxl	Chromatin regulator//Dioxygenase//Oxidoreductase	Crystal structure of JMJD2B complexed with pyridine-2,4-dicarboxylic acid and H3K9me3
231	2j50_2_ligand_01	0.466958	Molecule	2j50	Kinase//Serine/threonine-protein kinase//Transferase	Structure of Aurora-2 in complex with PHA-739358
232	1yi3_1_ligand_01-s	0.465839	Molecule	1yi3	Kinase//Serine/threonine-protein kinase//Transferase	Crystal Structure of Pim-1 bound to LY294002
233	3dh8_1_ligand_01-s	0.465597	Molecule	3dh8	Hydrolase	Structure of Pseudomonas Quinolone Signal Response Protein PqsE
234	1t41_1_ligand_01-s	0.464157	Molecule	1t41	Oxidoreductase	Crystal structure of human aldose reductase complexed with NADP and IDD552
235	2nsd_1_ligand_01	0.464152	Molecule	2nsd	Oxidoreductase	Enoyl acyl carrier protein reductase InhA in complex with N-(4-methylbenzoyl)-4-benzylpiperidine
236	2pdf_1_ligand_01-s	0.463364	Molecule	2pdf	Oxidoreductase	Human aldose reductase mutant L300P complexed with zopolrestat.
237	1n5q_1_ligand_01	0.463118	Molecule	1n5q	No Keywords	Crystal structure of a Monooxygenase from the gene ActVA-Orf6 of Streptomyces coelicolor in complex with dehydrated Sancycline
238	2nvd_1_ligand_01-s	0.462454	Molecule	2nvd	Oxidoreductase	Human Aldose Reductase complexed with novel naphtho[1,2-d]isothiazole acetic acid derivative (2)
239	3ld5_1_ligand_01	0.461975	Molecule	3ld5	Oxidoreductase	Human aldose reductase mutant T113S complexed with IDD594
240	4asy_4_ligand_01	0.461337	Molecule	4asy	Nucleotidyltransferase//Transferase	Pseudomonas aeruginosa RmlA in complex with allosteric inhibitor
241	3len_1_ligand_01	0.461162	Molecule	3len	Oxidoreductase	Human Aldose Reductase mutant T113S complexed with Zopolrestat
242	4bcd_1_ligand_01	0.45387	Molecule	4bcd	Hydrolase//Protease//Serine protease	PROLYL OLIGOPEPTIDASE FROM PORCINE BRAIN WITH A NON-COVALENTLY BOUND P2-substituted N-acyl-prolylpyrrolidine inhibitor
243	3ox1_1_ligand_01	0.453332	Molecule	3ox1	Oxidoreductase	X-ray Structural study of quinone reductase II inhibition by compounds with micromolar to nanomolar range IC50 values
244	4erw_1_ligand_01	0.449242	Molecule	4erw	Kinase//Serine/threonine-protein kinase//Transferase	CDK2 in complex with staurosporine
245	1z3n_1_ligand_01-s	0.449198	Molecule	1z3n	Oxidoreductase	Human aldose reductase in complex with NADP+ and the inhibitor lidorestat at 1.04 angstrom
246	4wkq_1_ligand_01	0.448111	Molecule	4wkq	Developmental protein//Host cell receptor for virus entry//Kinase//Receptor//Transferase//Tyrosine-protein kinase	1.85 angstrom structure of EGFR kinase domain with gefitinib
247	2ow2_2_ligand_01-s	0.447169	Molecule	2ow2	Hydrolase//Metalloprotease//Protease	MMP-9 active site mutant with difluoro butanoic acid inhibitor
248	4h4b_1_ligand_01	0.446682	Molecule	4h4b	Allosteric enzyme//Hydrolase	Human cytosolic 5'-nucleotidase II in complex with Anthraquinone-2,6- disulfonic acid
249	1zzl_1_ligand_01-s	0.446136	Molecule	1zzl	Kinase//Serine/threonine-protein kinase//Transferase	Crystal structure of P38 with triazolopyridine
250	3w1w_1_ligand_01	0.445069	Molecule	3w1w	Lyase	Protein-drug complex
251	2jh5_1_ligand_01	0.444947	Molecule	2jh5	Hydrolase//Protease//Serine protease	Human Thrombin Hirugen Inhibitor complex
252	1j36_2_ligand_01	0.444674	Molecule	1j36	Carboxypeptidase//Hydrolase//Metalloprotease//Protease	Crystal Structure of Drosophila AnCE
253	2vb8_2_ligand_01-s	0.440941	Molecule	2vb8	Acyltransferase//Transferase	beta-ketoacyl-ACP synthase I (KAS) from E. coli with bound inhibitor thiolactomycin
254	3dh8_1_ligand_01	0.439497	Molecule	3dh8	Hydrolase	Structure of Pseudomonas Quinolone Signal Response Protein PqsE
255	1uog_1_ligand_01	0.438918	Molecule	1uog	Oxidoreductase	Deacetoxycephalosporin C synthase complexed with deacetoxycephalosporin C
256	2i19_2_ligand_01	0.438491	Molecule	2i19	Transferase	T. Brucei farnesyl diphosphate synthase complexed with bisphosphonate
257	3iu7_1_ligand_01	0.437163	Molecule	3iu7	Aminopeptidase//Hydrolase//Protease	M. tuberculosis methionine aminopeptidase with Mn inhibitor A02
258	2oc2_1_ligand_01	0.43615	Molecule	2oc2	Carboxypeptidase//Hydrolase//Metalloprotease//Protease	Structure of testis ACE with RXPA380
259	2x20_3_ligand_01	0.434586	Molecule	2x20	Light-harvesting polypeptide	Structure of Peridinin-Chlorophyll-Protein reconstituted with Chl-b
260	3blr_1_ligand_01	0.433617	Molecule	3blr	Kinase//Serine/threonine-protein kinase//Transferase	Crystal Structure of Human CDK9/cyclinT1 in complex with Flavopiridol
261	3em0_6_ligand_01	0.432799	Molecule	3em0	No Keywords	Crystal structure of Zebrafish Ileal Bile Acid-Bindin Protein complexed with cholic acid (crystal form B).
262	3rm8_2_ligand_01	0.431758	Molecule	3rm8	Glycosidase//Hydrolase	AMCase in complex with Compound 2
263	4l42_1_ligand_01-s	0.43175	Molecule	4l42	Kinase//Serine/threonine-protein kinase//Transferase	Crystal structures of human p70S6K1-PIF
264	4g2y_1_ligand_01	0.430103	Molecule	4g2y	Allosteric enzyme//Hydrolase	Crystal structure of PDE5A complexed with its inhibitor
265	1s2c_1_ligand_01-s	0.428945	Molecule	1s2c	Oxidoreductase	Crystal structures of prostaglandin D2 11-ketoreductase in complex with the non-steroidal anti-inflammatory drugs flufenamic acid and indomethacin
266	4o74_2_ligand_01	0.425768	Molecule	4o74	Chromatin regulator	Crystal structure of the first bromodomain of human BRD4 in complex with BI 2536
267	2x21_3_ligand_01	0.424164	Molecule	2x21	Light-harvesting polypeptide	Structure of Peridinin-Chlorophyll-Protein reconstituted with BChl-a
268	3lbo_1_ligand_01	0.422769	Molecule	3lbo	Oxidoreductase	Human aldose reductase mutant T113C complexed with IDD594
269	2viv_1_ligand_01	0.422648	Molecule	2viv	Hydrolase//Protease//Serine protease	Fragment-Based Discovery of Mexiletine Derivatives as Orally Bioavailable Inhibitors of Urokinase-Type Plasminogen Activator
270	4eyw_1_ligand_01	0.419916	Molecule	4eyw	Acyltransferase//Transferase	Crystal structure of rat carnitine palmitoyltransferase 2 in complex with 1-[(R)-2-(3,4-Dihydro-1H-isoquinoline-2-carbonyl)-piperidin-1-yl]-2-phenoxy-ethanone
271	4obu_2_ligand_01	0.419055	Molecule	4obu	Lyase	Ruminococcus gnavus tryptophan decarboxylase RUMGNA_01526 (apo)
272	3ov4_2_ligand_01	0.418882	Molecule	3ov4	Isomerase	Crystal Structure of Ketosteroid Isomerase P39GV40GS42G from Pseudomonas Testosteroni (tKSI) bound to Equilenin
273	2wgg_5_ligand_01	0.418057	Molecule	2wgg	Acyltransferase//Transferase	Crystal Structure of Mycobacterium tuberculosis C171Q KasA variant with bound TLM
274	3kb3_1_ligand_01	0.417975	Molecule	3kb3	Protein phosphatase inhibitor//Receptor	Crystal structure of abscisic acid-bound PYL2 in complex with HAB1
275	3p2v_1_ligand_01	0.417971	Molecule	3p2v	Oxidoreductase	Novel Benzothiazepine Inhibitor in Complex with human Aldose Reductase
276	1hnc_2_ligand_01	0.417879	Molecule	1hnc	Transferase	CRYSTAL STRUCTURE OF HUMAN CLASS MU GLUTATHIONE TRANSFERASE GSTM2-2: EFFECTS OF LATTICE PACKING ON CONFORMATIONAL HETEROGENEITY
277	3d4s_2_ligand_01	0.417436	Molecule	3d4s	G-protein coupled receptor//Receptor//Transducer	Cholesterol bound form of human beta2 adrenergic receptor.
278	2pdh_1_ligand_01-s	0.415272	Molecule	2pdh	Oxidoreductase	Human aldose reductase mutant L300P complexed with uracil-type inhibitor at 1.45 A.
279	4bqy_1_ligand_01	0.414157	Molecule	4bqy	Dioxygenase//Oxidoreductase	HIF prolyl hydroxylase 2 (PHD2/ EGLN1) in complex with Fe(II) and N-[(1-chloro-4-hydroxyisoquinolin-3-yl)carbonyl]alanine
280	2o3z_2_ligand_01-s	0.411859	Molecule	2o3z	Hydrolase	X-ray crystal structure of LpxC complexed with 3-heptyloxybenzoate
281	1kqg_3_ligand_01-s	0.410713	Molecule	1kqg	No Keywords	FORMATE DEHYDROGENASE N FROM E. COLI
282	2qd4_6_ligand_01	0.409815	Molecule	2qd4	Lyase	Wild type human ferrochelatase crystallized with MnCl2
283	4hl2_1_ligand_01	0.409639	Molecule	4hl2	Hydrolase	New Delhi Metallo-beta-Lactamase-1 1.05 A structure Complexed with Hydrolyzed Ampicillin
284	1h9z_1_ligand_01	0.407949	Molecule	1h9z	DNA-binding//Antioxidant	Human Serum Albumin Complexed With Myristic Acid and the R-(+) enantiomer of warfarin
285	2wwj_2_ligand_01-s	0.406447	Molecule	2wwj	Chromatin regulator//Dioxygenase//Oxidoreductase	STRUCTURE OF JMJD2A COMPLEXED WITH INHIBITOR 10A
286	2ow2_2_ligand_01	0.406288	Molecule	2ow2	Hydrolase//Metalloprotease//Protease	MMP-9 active site mutant with difluoro butanoic acid inhibitor
287	2rki_1_ligand_01	0.403976	Molecule	2rki	Aspartyl protease//DNA-binding//DNA-directed DNA polymerase//Endonuclease//Hydrolase//Multifunctional enzyme//Nuclease//Nucleotidyltransferase//Protease//RNA-binding//RNA-directed DNA polymerase//Transferase//Viral nucleoprotein	Crystal Structure of HIV-1 Reverse Transcriptase (RT) in Complex with a triazole derived NNRTI
288	4h4b_1_ligand_01-s	0.40293	Molecule	4h4b	Allosteric enzyme//Hydrolase	Human cytosolic 5'-nucleotidase II in complex with Anthraquinone-2,6- disulfonic acid
289	4cfa_1_ligand_01	0.402393	Molecule	4cfa	DNA-binding//Endonuclease//Hydrolase//Multifunctional enzyme//Nuclease//Nucleotidyltransferase//RNA-directed DNA polymerase//Transferase	Interrogating HIV integrase for compounds that bind- a SAMPL challenge
290	2jb4_1_ligand_01-s	0.401877	Molecule	2jb4	Oxidoreductase	Isopenicillin N synthase with a 2-thiabicycloheptan-6-one product analogue
291	4l98_2_ligand_01-s	0.400982	Molecule	4l98	Activator//DNA-binding//Receptor	Crystal structure of the complex of F360L PPARgamma mutant with the ligand LT175
292	2r2l_1_ligand_01	0.400081	Molecule	2r2l	Prenyltransferase//Transferase	Structure of Farnesyl Protein Transferase bound to PB-93
293	6std_3_ligand_01	0.399924	Molecule	6std	Lyase	SCYTALONE DEHYDRATASE PLUS INHIBITOR 3
294	1s4e_9_ligand_01	0.399485	Molecule	1s4e	Kinase//Transferase	Pyrococcus furiosus galactokinase in complex with galactose, ADP and magnesium
295	1s4e_9_ligand_01-s	0.399485	Molecule	1s4e	Kinase//Transferase	Pyrococcus furiosus galactokinase in complex with galactose, ADP and magnesium
296	2q92_1_ligand_01	0.397667	Molecule	2q92	Aminopeptidase//Hydrolase//Protease	E. coli methionine aminopeptidase Mn-form with inhibitor B23
297	4c6z_1_ligand_01	0.394713	Molecule	4c6z	Acyltransferase//Transferase	Crystal structure of M. tuberculosis C171Q KasA in complex with TLM3
298	4chq_2_ligand_01	0.392757	Molecule	4chq	DNA-binding//Endonuclease//Hydrolase//Multifunctional enzyme//Nuclease//Nucleotidyltransferase//RNA-directed DNA polymerase//Transferase	Interrogating HIV integrase for compounds that bind- a SAMPL challenge
299	3ghu_1_ligand_01	0.392352	Molecule	3ghu	Oxidoreductase	Human aldose reductase in complex with NADP+ and the inhibitor IDD594. Investigation of global effects of radiation damage on protein structure. Forth stage of radiation damage.
300	2rht_1_ligand_01-s	0.391625	Molecule	2rht	Hydrolase	Crystal Structure of the S112A mutant of a C-C hydrolase, BphD from Burkholderia xenovorans LB400, in complex with 3-Cl HOPDA
301	3kdi_1_ligand_01	0.38818	Molecule	3kdi	Protein phosphatase inhibitor//Receptor	Structure of (+)-ABA bound PYL2
302	2gyu_2_ligand_01	0.386544	Molecule	2gyu	Hydrolase//Serine esterase	Crystal structure of Mus musculus Acetylcholinesterase in complex with HI-6
303	3s3g_1_ligand_01	0.386526	Molecule	3s3g	Oxidoreductase	Crystal Structure of Human Aldose Reductase Complexed with Tolmetin
304	2wm3_1_ligand_01	0.38645	Molecule	2wm3	No Keywords	Crystal structure of NmrA-like family domain containing protein 1 in complex with niflumic acid
305	4ds8_1_ligand_01	0.386007	Molecule	4ds8	Protein phosphatase inhibitor//Receptor	Complex structure of abscisic acid receptor PYL3-(+)-ABA-HAB1 in the presence of Mn2+
306	1o6q_3_ligand_01	0.385528	Molecule	1o6q	Isomerase//Lyase	Structures of human oxidosqualene cyclase inhibitors bound to an homologous enzyme
307	4jf1_2_ligand_01	0.379405	Molecule	4jf1	Aminotransferase//Transferase	R144Q mutant of N-acetylornithine aminotransferase
308	1gg5_2_ligand_01	0.379015	Molecule	1gg5	Oxidoreductase	CRYSTAL STRUCTURE OF A COMPLEX OF HUMAN NAD[P]H-QUINONE OXIDOREDUCTASE AND A CHEMOTHERAPEUTIC DRUG (E09) AT 2.5 A RESOLUTION
309	4dbs_4_ligand_01	0.378923	Molecule	4dbs	Oxidoreductase	Crystal structure of human 17beta-hydroxysteroid dehydrogenase type 5 (AKR1C3) in complex with NADP+ and 3'-[(4-nitronaphthalen-1-yl)amino]benzoic acid
310	2jb4_1_ligand_01	0.377951	Molecule	2jb4	Oxidoreductase	Isopenicillin N synthase with a 2-thiabicycloheptan-6-one product analogue
311	3cyz_3_ligand_01	0.377795	Molecule	3cyz	No Keywords	Dimeric crystal structure of a pheromone binding protein from Apis mellifera in complex with 9-keto-2(E)-decenoic acid at pH 7.0
312	2d3u_2_ligand_01	0.377136	Molecule	2d3u	Helicase//Hydrolase//Nucleotidyltransferase//Protease//RNA-directed RNA polymerase//Thiol protease//Transferase	X-ray crystal structure of hepatitis C virus RNA dependent RNA polymerase in complex with non-nucleoside analogue inhibitor
313	2jh0_1_ligand_01	0.376857	Molecule	2jh0	Hydrolase//Protease//Serine protease	Human Thrombin Hirugen Inhibitor complex
314	1s2c_1_ligand_01	0.37588	Molecule	1s2c	Oxidoreductase	Crystal structures of prostaglandin D2 11-ketoreductase in complex with the non-steroidal anti-inflammatory drugs flufenamic acid and indomethacin
315	1tv5_1_ligand_01	0.375647	Molecule	1tv5	Oxidoreductase	Plasmodium falciparum dihydroorotate dehydrogenase with a bound inhibitor
316	4x86_1_ligand_01	0.373883	Molecule	4x86	Chaperone//Chromatin regulator//No Keywords	Crystal structure of BAG6-Ubl4a complex
317	3cl2_8_ligand_01	0.373438	Molecule	3cl2	Glycosidase//Hydrolase	N1 Neuraminidase N294S + Oseltamivir
318	1u3w_2_ligand_01	0.373206	Molecule	1u3w	Oxidoreductase	Crystal Structure of Human Alcohol Dehydrogenase Gamma-2-Gamma-2 Isoform Complexed with N-1-Methylheptylformamide Determined to 1.45 Angstrom Resolution
319	3g49_2_ligand_01-s	0.373108	Molecule	3g49	Oxidoreductase	N-(Pyridin-2-yl) Arylsulfonamide Inhibitors of 11b-Hydroxysteroid Dehydrogenase Type 1: Discovery of PF-915275
320	4ju4_1_ligand_01	0.372915	Molecule	4ju4	Helicase//Hydrolase//Ion channel//Multifunctional enzyme//Nucleotidyltransferase//Protease//Ribonucleoprotein//RNA-binding//RNA-directed RNA polymerase//Serine protease//Thiol protease//Transferase//Viral ion channel//Viral nucleoprotein	Crystal structure of hcv ns5b polymerase in complex with compound 22
321	3sao_1_ligand_01	0.37273	Molecule	3sao	Antibiotic//Antimicrobial	The Siderocalin Ex-FABP functions through dual ligand specificities
322	3r43_1_ligand_01	0.370335	Molecule	3r43	Oxidoreductase	AKR1C3 complexed with mefenamic acid
323	4ajm_1_ligand_01	0.369318	Molecule	4ajm	Allosteric enzyme//Hydrolase	Development of a plate-based optical biosensor methodology to identify PDE10 fragment inhibitors
324	3jxw_1_ligand_01	0.367732	Molecule	3jxw	Kinase//Serine/threonine-protein kinase//Transferase	Discovery of 3H-benzo[4,5]thieno[3,2-d]pyrimidin-4-ones as Potent, Highly Selective and Orally Bioavailable Pim Kinases Inhibitors
325	2bx8_3_ligand_01	0.367019	Molecule	2bx8	DNA-binding//Antioxidant	Human serum albumin complexed with azapropazone
326	3gus_2_ligand_01	0.36689	Molecule	3gus	Transferase	Crystal strcture of human Pi class glutathione S-transferase GSTP1-1 in complex with 6-(7-Nitro-2,1,3-benzoxadiazol-4-ylthio)hexanol (NBDHEX)
327	4b11_5_ligand_01-s	0.366654	Molecule	4b11	Acyltransferase//Transferase	Plasmodium vivax N-myristoyltransferase with a bound benzofuran inhibitor (compound 13)
328	4gpj_1_ligand_01	0.365672	Molecule	4gpj	Chromatin regulator	Crystal Structure of the first bromodomain of human BRD4 in complex with a isoxazolylbenzimidazole ligand
329	1vso_1_ligand_01	0.365062	Molecule	1vso	Ion channel//Ligand-gated ion channel//Receptor	Crystal Structure of the Ligand-Binding Core of iGluR5 in Complex With the Antagonist (S)-ATPO at 1.85 A resolution
330	3ow3_1_ligand_01	0.363958	Molecule	3ow3	Kinase//Serine/threonine-protein kinase//Transferase	Discovery of dihydrothieno- and dihydrofuropyrimidines as potent pan Akt inhibitors
331	2pu2_1_ligand_01-s	0.362574	Molecule	2pu2	Hydrolase	AmpC beta-lactamase with bound Phthalamide inhibitor
332	3lu6_1_ligand_01-s	0.362468	Molecule	3lu6	DNA-binding//Antioxidant	Human serum albumin in complex with compound 1
333	1kqg_3_ligand_01	0.362426	Molecule	1kqg	No Keywords	FORMATE DEHYDROGENASE N FROM E. COLI
334	3mb7_1_ligand_01	0.360281	Molecule	3mb7	Kinase//Serine/threonine-protein kinase//Transferase	Human CK2 catalytic domain in complex with a difurane derivative inhibitor (AMR)
335	4g1w_1_ligand_01	0.358554	Molecule	4g1w	Kinase//Serine/threonine-protein kinase//Transferase	Crystal structure of JNK1 in complex with JIP1 peptide and 7-Fluoro-3-[4-(2-hydroxy-ethanesulfonyl)-benzyl]-4-oxo-1-phenyl-1,4-dihydro-quinoline-2-carboxylic acid methyl ester
336	4ca5_1_ligand_01	0.356812	Molecule	4ca5	Carboxypeptidase//Hydrolase//Metalloprotease//Protease	Human Angiotensin converting enzyme in complex with a phosphinic tripeptide FI
337	3std_1_ligand_01	0.354362	Molecule	3std	Lyase	SCYTALONE DEHYDRATASE AND CYANOCINNOLINE INHIBITOR
338	2vd7_2_ligand_01	0.35434	Molecule	2vd7	Chromatin regulator//Dioxygenase//Oxidoreductase	Crystal Structure of JMJD2A complexed with inhibitor Pyridine-2,4- dicarboxylic acid
339	4bfu_1_ligand_01	0.353814	Molecule	4bfu	Kinase//Transferase	Crystal structure of Mycobacterium tuberculosis PanK in complex with a triazole inhibitory compound (1c) and phosphate
340	4v3i_1_ligand_01	0.350792	Molecule	4v3i	No Keywords	Crystal Structure of TssL from Vibrio cholerae.
341	3lu6_1_ligand_01	0.349316	Molecule	3lu6	DNA-binding//Antioxidant	Human serum albumin in complex with compound 1
342	2evm_1_ligand_01	0.348716	Molecule	2evm	Aminopeptidase//Hydrolase//Protease	crystal structure of methionine aminopeptidase in complex with 5-(2,5-dichlorophenyl)furan-2-carboxylic acid
343	4mr6_1_ligand_01	0.348706	Molecule	4mr6	Chromatin regulator	Crystal Structure of the second bromodomain of human BRD2 in complex with a quinazolinone ligand (RVX-208)
344	3ght_1_ligand_01	0.346722	Molecule	3ght	Oxidoreductase	Human aldose reductase in complex with NADP+ and the inhibitor IDD594. Investigation of global effects of radiation damage on protein structure. Third stage of radiation damage.
345	4bqy_1_ligand_01-s	0.343914	Molecule	4bqy	Dioxygenase//Oxidoreductase	HIF prolyl hydroxylase 2 (PHD2/ EGLN1) in complex with Fe(II) and N-[(1-chloro-4-hydroxyisoquinolin-3-yl)carbonyl]alanine
346	4k5o_1_ligand_01	0.343687	Molecule	4k5o	Aminopeptidase//Hydrolase//Metalloprotease//Protease	Phosphonic Arginine Mimetics as Inhibitors of the M1 Aminopeptidases from Plasmodium falciparum
347	4n3e_7_ligand_01	0.343551	Molecule	4n3e	Pathogenesis-related protein	Crystal structure of Hyp-1, a St John's wort PR-10 protein, in complex with 8-anilino-1-naphthalene sulfonate (ANS)
348	4jib_3_ligand_01	0.343436	Molecule	4jib	Hydrolase	Crystal structure of of PDE2-inhibitor complex
349	4eb5_2_ligand_01	0.343014	Molecule	4eb5	Transferase	A. fulgidus IscS-IscU complex structure
350	1h5t_1_ligand_01	0.341767	Molecule	1h5t	Nucleotidyltransferase//Transferase	Thymidylyltransferase complexed with Thymidylyldiphosphate-glucose
351	2pb2_1_ligand_01	0.341667	Molecule	2pb2	Aminotransferase//Transferase	Structure of biosynthetic N-acetylornithine aminotransferase from Salmonella typhimurium: studies on substrate specificity and inhibitor binding
352	3t7p_1_ligand_01	0.339463	Molecule	3t7p	Aspartyl protease//Hydrolase//Protease	Endothiapepsin in complex with a hydrazide derivative
353	3we4_1_ligand_01	0.338897	Molecule	3we4	Kinase//Serine/threonine-protein kinase//Transferase	Crystal structure of S6K1 kinase domain in complex with a pyrimidine derivative PF-4708671 2-{[4-(5-ethylpyrimidin-4-yl)piperazin-1-yl]methyl}-5-(trifluoromethyl)-1H-benzimidazole
354	4h7c_1_ligand_01-s	0.337367	Molecule	4h7c	Oxidoreductase	Crystal structure of human 17beta-hydroxysteroid dehydrogenase type 5 in complex with 1-{4-[(2-methyl-1-piperidinyl)sulfonyl]phenyl}-2-pyrrolidinone
355	3bgp_1_ligand_01	0.33677	Molecule	3bgp	Kinase//Serine/threonine-protein kinase//Transferase	Human Pim-1 complexed with a benzoisoxazole inhibitor VX1
356	4c66_1_ligand_01	0.335671	Molecule	4c66	Chromatin regulator	Discovery of Epigenetic Regulator I-BET762: Lead Optimization to Afford a Clinical Candidate Inhibitor of the BET Bromodomains
357	3ivm_1_ligand_01	0.334189	Molecule	3ivm	No Keywords	apPEP_WT+PP closed state
358	4e5j_4_ligand_01	0.333932	Molecule	4e5j	Endonuclease//Hydrolase//Nuclease	Crystal structure of avian influenza virus PAn bound to compound 5
359	4i03_1_ligand_01	0.330539	Molecule	4i03	Hydrolase//Metalloprotease//Protease	Human MMP12 in complex with a PEG-linked bifunctional L-glutamate motif inhibitor
360	3lz5_1_ligand_01	0.330483	Molecule	3lz5	Oxidoreductase	Human aldose reductase mutant T113V complexed with IDD594
361	4de5_2_ligand_01	0.329501	Molecule	4de5	Ligase	Pantothenate synthetase in complex with fragment 6
362	3vvp_1_ligand_01	0.326613	Molecule	3vvp	No Keywords	Crystal structure of MATE in complex with Br-NRF
363	4aa4_1_ligand_01	0.326169	Molecule	4aa4	Kinase//Serine/threonine-protein kinase//Transferase	P38ALPHA MAP KINASE BOUND TO CMPD 22
364	4l3l_1_ligand_01	0.32552	Molecule	4l3l	Kinase//Serine/threonine-protein kinase//Transferase	Crystal structures of human p70S6K1 kinase domain (Zinc anomalous)
365	2hai_1_ligand_01	0.325317	Molecule	2hai	Helicase//Hydrolase//Nucleotidyltransferase//Protease//RNA-directed RNA polymerase//Thiol protease//Transferase	Crystal structure of HCV NS5B RNA polymerase in complex with novel class of dihydropyrone-containing inhibitor.
366	4bdo_3_ligand_01	0.321578	Molecule	4bdo	Ion channel//Ligand-gated ion channel//Receptor	Crystal structure of the GluK2 K531A-T779G LBD dimer in complex with kainate
367	1wkg_1_ligand_01	0.320496	Molecule	1wkg	Aminotransferase//Transferase	Acetylornithine aminotransferase from thermus thermophilus HB8
368	3s2a_1_ligand_01	0.320457	Molecule	3s2a	Kinase//Serine/threonine-protein kinase//Transferase	Crystal structure of PI3K-gamma in complex with a quinoline inhibitor
369	4asj_4_ligand_01	0.319474	Molecule	4asj	Nucleotidyltransferase//Transferase	Pseudomonas aeruginosa RmlA in complex with allosteric inhibitor
370	3mel_2_ligand_01	0.319255	Molecule	3mel	Kinase//Transferase	Crystal Structure of Thiamin pyrophosphokinase family protein from Enterococcus faecalis, Northeast Structural Genomics Consortium Target EfR150
371	2dv0_1_ligand_01	0.314607	Molecule	2dv0	Oxidoreductase	Human Aldose Reductase complexed with zopolrestat after 6 days soaking(6days_soaked_2)
372	2dv0_1_ligand_01-s	0.314607	Molecule	2dv0	Oxidoreductase	Human Aldose Reductase complexed with zopolrestat after 6 days soaking(6days_soaked_2)
373	1n5q_1_ligand_01-s	0.313999	Molecule	1n5q	No Keywords	Crystal structure of a Monooxygenase from the gene ActVA-Orf6 of Streptomyces coelicolor in complex with dehydrated Sancycline
374	1z4u_1_ligand_01	0.313836	Molecule	1z4u	Helicase//Hydrolase//Nucleotidyltransferase//Protease//RNA-directed RNA polymerase//Thiol protease//Transferase	hepatitis C virus NS5B RNA-dependent RNA polymerase complex with inhibitor PHA-00799585
375	1mlz_2_ligand_01	0.310533	Molecule	1mlz	Aminotransferase//Transferase	Crystal Structure of 7,8-Diaminopelargonic Acid Synthase in complex with the trans-isomer of amiclenomycin.
376	4jfi_1_ligand_01	0.309834	Molecule	4jfi	Chaperone//Isomerase//Rotamase	Increasing the Efficiency Efficiency of Ligands for the FK506-Binding Protein 51 by Conformational Control: Complex of FKBP51 with compound 1-[(9S,13R,13aR)-1,3-dimethoxy-8-oxo-5,8,9,10,11,12,13,13a-octahydro-6H-9,13-epiminoazocino[2,1-a]isoquinolin-14-yl]-2-(3,4,5-trimethoxyphenyl)ethane-1,2-dione
377	2oem_2_ligand_01	0.309201	Molecule	2oem	Isomerase	Crystal structure of a rubisco-like protein from Geobacillus kaustophilus liganded with Mg2+ and 2,3-diketohexane 1-phosphate
378	4mr6_1_ligand_01-s	0.308313	Molecule	4mr6	Chromatin regulator	Crystal Structure of the second bromodomain of human BRD2 in complex with a quinazolinone ligand (RVX-208)
379	1r9o_1_ligand_01	0.308278	Molecule	1r9o	Monooxygenase//Oxidoreductase	Crystal Structure of P4502C9 with Flurbiprofen bound
380	2hv5_1_ligand_01-s	0.305907	Molecule	2hv5	Oxidoreductase	Human Aldose Reductase complexed with inhibitor zopolrestat after three days soaking (3days_soaked_3)
381	2hv5_1_ligand_01	0.305907	Molecule	2hv5	Oxidoreductase	Human Aldose Reductase complexed with inhibitor zopolrestat after three days soaking (3days_soaked_3)
382	3fmz_2_ligand_01	0.302604	Molecule	3fmz	No Keywords	Crystal Structure of Retinol-Binding Protein 4 (RBP4) in complex with non-retinoid ligand
383	3pdq_1_ligand_01	0.301368	Molecule	3pdq	Chromatin regulator//Dioxygenase//Oxidoreductase	Crystal structure of JMJD2A complexed with bipyridyl inhibitor
384	1dpm_1_ligand_01	0.29955	Molecule	1dpm	Hydrolase	THREE-DIMENSIONAL STRUCTURE OF THE ZINC-CONTAINING PHOSPHOTRIESTERASE WITH BOUND SUBSTRATE ANALOG DIETHYL 4-METHYLBENZYLPHOSPHONATE
385	4chq_2_ligand_01-s	0.299008	Molecule	4chq	DNA-binding//Endonuclease//Hydrolase//Multifunctional enzyme//Nuclease//Nucleotidyltransferase//RNA-directed DNA polymerase//Transferase	Interrogating HIV integrase for compounds that bind- a SAMPL challenge
386	3n6u_1_ligand_01	0.298134	Molecule	3n6u	DNA-binding	Effector binding domain of TsaR in complex with its inducer p-toluenesulfonate
387	3jpv_1_ligand_01	0.298111	Molecule	3jpv	Kinase//Serine/threonine-protein kinase//Transferase	Crystal structure of human proto-oncogene serine threonine kinase (PIM1) in complex with a consensus peptide and a pyrrolo[2,3-a]carbazole ligand
388	4l96_1_ligand_01-s	0.296914	Molecule	4l96	Activator//DNA-binding//Receptor	Structure of the complex between the F360L PPARgamma mutant and the ligand LT175 (space group I222)
389	3qpn_1_ligand_01	0.296289	Molecule	3qpn	Allosteric enzyme//Hydrolase	Structure of PDE10-inhibitor complex
390	3ie3_2_ligand_01	0.294031	Molecule	3ie3	Transferase	Structural basis for the binding of the anti-cancer compound 6-(7-Nitro-2,1,3-benzoxadiazol-4-ylthio)hexanol (NBDHEX) to human glutathione S-transferases
391	2fbw_2_ligand_01	0.292847	Molecule	2fbw	Oxidoreductase//No Keywords	Avian respiratory complex II with carboxin bound
392	2gtn_1_ligand_01-s	0.284262	Molecule	2gtn	Kinase//Serine/threonine-protein kinase//Transferase	Mutated MAP kinase P38 (Mus Musculus) in complex with Inhbitor PG-951717
393	3ivc_2_ligand_01	0.282133	Molecule	3ivc	Ligase	Crystal structure of pantothenate synthetase in complex with 2-(2-((benzofuran-2-ylmethoxy)carbonyl)-5-methoxy-1H-indol-1-yl)acetic acid
394	4e4q_1_ligand_01-s	0.282013	Molecule	4e4q	Activator//DNA-binding//Receptor	Crystal structure of PPARgamma with the ligand FS214
395	3r58_1_ligand_01	0.281813	Molecule	3r58	Oxidoreductase	AKR1C3 complex with naproxen
396	2bxg_4_ligand_01	0.280508	Molecule	2bxg	DNA-binding//Antioxidant	Human serum albumin complexed with ibuprofen
397	2ojt_2_ligand_01	0.279746	Molecule	2ojt	Ion channel//Ligand-gated ion channel//Receptor	Structure and mechanism of kainate receptor modulation by anions
398	3iqh_1_ligand_01	0.279725	Molecule	3iqh	Allosteric enzyme//Transferase	Structure of O-Acetylserine Sulfhydrylase in Complex with Peptide MNYDI
399	4b42_2_ligand_01-s	0.279635	Molecule	4b42	Nucleotidyltransferase//Transferase	Pseudomonas aeruginosa RmlA in complex with allosteric inhibitor
400	4i9n_16_ligand_01	0.276269	Molecule	4i9n	Oxidoreductase	Crystal structure of rabbit LDHA in complex with AP28161 and AP28122
401	1xnz_1_ligand_01	0.27616	Molecule	1xnz	Aminopeptidase//Hydrolase//Protease	Crystal Structure of Mn(II) form of E. coli. Methionine Aminopeptidase in complex with 5-(2-chlorophenyl)furan-2-carboxylic acid
402	4hyh_1_ligand_01	0.276077	Molecule	4hyh	Kinase//Serine/threonine-protein kinase//Transferase	X-RAY Crystal structure of compound 39 bound to human chk1 kinase domain
403	3mqe_4_ligand_01	0.273894	Molecule	3mqe	Dioxygenase//Oxidoreductase//Peroxidase	Structure of SC-75416 bound at the COX-2 active site
404	2pd5_1_ligand_01-s	0.273219	Molecule	2pd5	Oxidoreductase	Human aldose reductase mutant V47I complexed with zopolrestat
405	4l96_1_ligand_01	0.272457	Molecule	4l96	Activator//DNA-binding//Receptor	Structure of the complex between the F360L PPARgamma mutant and the ligand LT175 (space group I222)
406	3r0y_1_ligand_01	0.272247	Molecule	3r0y	Aspartyl protease//Hydrolase//Multifunctional enzyme//Nucleotidyltransferase//Protease//RNA-directed DNA polymerase//Transferase	Crystal Structures of Multidrug-resistant HIV-1 Protease in Complex with Mechanism-Based Aspartyl Protease Inhibitors
407	3rv9_1_ligand_01	0.271416	Molecule	3rv9	Isomerase//Lyase	Structure of a M. tuberculosis Salicylate Synthase, MbtI, in Complex with an Inhibitor with Ethyl R-Group
408	4deg_1_ligand_01	0.271402	Molecule	4deg	Kinase//Receptor//Transferase//Tyrosine-protein kinase	Crystal structure of c-Met in complex with triazolopyridazine inhibitor 2
409	2gtn_1_ligand_01	0.267029	Molecule	2gtn	Kinase//Serine/threonine-protein kinase//Transferase	Mutated MAP kinase P38 (Mus Musculus) in complex with Inhbitor PG-951717
410	1uoq_1_ligand_01	0.266704	Molecule	1uoq	Hydrolase//Protease//Serine protease	PROLYL OLIGOPEPTIDASE FROM PORCINE BRAIN, S554A MUTANT WITH BOUND PEPTIDE LIGAND GLU-PHE-SER-PRO
411	2xzg_1_ligand_01	0.266286	Molecule	2xzg	RNA-binding	Clathrin Terminal Domain Complexed with Pitstop 1
412	1jjt_1_ligand_01-s	0.265814	Molecule	1jjt	Hydrolase	IMP-1 METALLO BETA-LACTAMASE FROM PSEUDOMONAS AERUGINOSA IN COMPLEX WITH A BIARYL SUCCINIC ACID INHIBITOR (1)
413	4pu2_1_ligand_01	0.262897	Molecule	4pu2	Aminopeptidase//Hydrolase//Protease	Crystal structure of Aminopeptidase N in complex with the phosphonic acid analogue of leucine L-(R)-LeuP
414	3uwe_1_ligand_01	0.262593	Molecule	3uwe	Oxidoreductase	AKR1C3 complexed with 3-phenoxybenzoic acid
415	4a83_2_ligand_01	0.261669	Molecule	4a83	Pathogenesis-related protein	Crystal Structure of Major Birch Pollen Allergen Bet v 1 a in complex with deoxycholate.
416	4c72_1_ligand_01	0.26147	Molecule	4c72	Acyltransferase//Transferase	Crystal structure of M. tuberculosis C171Q KasA in complex with TLM5
417	3kro_1_ligand_01	0.259719	Molecule	3kro	Transferase	Mint heterotetrameric geranyl pyrophosphate synthase in complex with magnesium, IPP, and DMASPP (II)
418	4l3l_1_ligand_01-s	0.259193	Molecule	4l3l	Kinase//Serine/threonine-protein kinase//Transferase	Crystal structures of human p70S6K1 kinase domain (Zinc anomalous)
419	2ph8_1_ligand_01	0.25862	Molecule	2ph8	Aspartyl protease//Hydrolase//Protease	Crystal Structure of Human Beta Secretase Complexed with inhibitor
420	1k8y_1_ligand_01	0.258613	Molecule	1k8y	Allosteric enzyme//Lyase	CRYSTAL STRUCTURE OF THE TRYPTOPHAN SYNTHASE BETA-SER178PRO MUTANT COMPLEXED WITH D,L-ALPHA-GLYCEROL-3-PHOSPHATE
421	3anl_1_ligand_01	0.258253	Molecule	3anl	Oxidoreductase	Crystal structure of 1-deoxy-D-xylulose 5-phosphate reductoisomerase (DXR) complexed with pyridin-2-ylmethylphosphonic acid
422	4bfx_2_ligand_01	0.25436	Molecule	4bfx	Kinase//Transferase	Crystal structure of Mycobacterium tuberculosis PanK in complex with a triazole inhibitory compound (1f) and phosphate
423	3fpb_1_ligand_01	0.254093	Molecule	3fpb	Hydrolase	The Structure of Sarcoplasmic Reticulum Ca2+-ATPase Bound To Cyclopiazonic acid with ATP
424	4ddh_2_ligand_01	0.252921	Molecule	4ddh	Ligase	Pantothenate synthetase in complex with 6-methoxy-1-benzofuran-3-yl acetic acid
425	4fm5_1_ligand_01	0.252413	Molecule	4fm5	Dioxygenase//Oxidoreductase//Peroxidase	X-ray structure of des-methylflurbiprofen bound to murine COX-2
426	3csj_1_ligand_01	0.252343	Molecule	3csj	Transferase	Human glutathione s-transferase p1-1 in complex with chlorambucil
427	3fxu_4_ligand_01	0.25227	Molecule	3fxu	DNA-binding	Crystal structure of TsaR in complex with its effector p-toluenesulfonate
428	3ghr_1_ligand_01	0.251019	Molecule	3ghr	Oxidoreductase	Human aldose reductase in complex with NADP+ and the inhibitor IDD594. Investigation of global effects of radiation damage on protein structure. First stage of radiation damage
429	2wwj_2_ligand_01	0.250986	Molecule	2wwj	Chromatin regulator//Dioxygenase//Oxidoreductase	STRUCTURE OF JMJD2A COMPLEXED WITH INHIBITOR 10A
430	3new_1_ligand_01	0.24828	Molecule	3new	Kinase//Serine/threonine-protein kinase//Transferase	p38-alpha complexed with Compound 10
431	3ghs_1_ligand_01	0.246226	Molecule	3ghs	Oxidoreductase	Human aldose reductase in complex with NADP+ and the inhibitor IDD594. Investigation of global effects of radiation damage on protein structure. Second stage of radiation damage.
432	1eko_1_ligand_01	0.24386	Molecule	1eko	Oxidoreductase	PIG ALDOSE REDUCTASE COMPLEXED WITH IDD384 INHIBITOR
433	3bgp_1_ligand_01-s	0.242066	Molecule	3bgp	Kinase//Serine/threonine-protein kinase//Transferase	Human Pim-1 complexed with a benzoisoxazole inhibitor VX1
434	2evc_1_ligand_01	0.237067	Molecule	2evc	Aminopeptidase//Hydrolase//Protease	Crystal structure of E. Coli. methionine amino peptidase in complex with 5-(2-(trifluoromethyl)phenyl)furan-2-carboxylic acid
435	4fa3_1_ligand_01	0.236851	Molecule	4fa3	Oxidoreductase	Crystal structure of human 17beta-hydroxysteroid dehydrogenase type 5 in complex with (R)-1-(naphthalen-2-ylsulfonyl)piperidine-3-carboxylic acid (86)
436	2oaz_1_ligand_01	0.236593	Molecule	2oaz	Aminopeptidase//Hydrolase//Protease	Human Methionine Aminopeptidase-2 Complexed with SB-587094
437	2xae_3_ligand_01	0.235257	Molecule	2xae	Motor protein	Crystal structure of human kinesin Eg5 in complex with (R)-2-amino-3-((S)-2-methyl-1,1-diphenylbutylthio)propanoic acid
438	4ot2_2_ligand_01	0.235248	Molecule	4ot2	DNA-binding	Crystal Structure of Equine Serum Albumin in complex with Naproxen
439	4i6f_1_ligand_01	0.234771	Molecule	4i6f	Kinase//Serine/threonine-protein kinase//Transferase	Selective & Brain-Permeable Polo-like Kinase-2 (Plk-2) Inhibitors that Reduce -Synuclein Phosphorylation in Rat Brain
440	3jsx_5_ligand_01-s	0.234149	Molecule	3jsx	Oxidoreductase	X-ray Crystal structure of NAD(P)H: Quinone Oxidoreductase-1 (NQO1) bound to the coumarin-based inhibitor AS1
441	1uoo_1_ligand_01	0.23303	Molecule	1uoo	Hydrolase//Protease//Serine protease	Prolyl oligopeptidase from porcine brain, S554A mutant with bound peptide ligand GLY-PHE-ARG-PRO
442	2qs3_2_ligand_01	0.233006	Molecule	2qs3	Ion channel//Ligand-gated ion channel//Receptor	Crystal structure of the GluR5 ligand binding core dimer in complex with UBP316 at 1.76 Angstroms resolution
443	4l3j_1_ligand_01	0.231364	Molecule	4l3j	Kinase//Serine/threonine-protein kinase//Transferase	Crystal structures of human p70S6K1 kinase domain
444	3mb9_1_ligand_01-s	0.229908	Molecule	3mb9	Oxidoreductase	Human Aldose Reductase mutant T113A complexed with Zopolrestat
445	3b99_4_ligand_01	0.229735	Molecule	3b99	Isomerase	Crystal structure of zebrafish prostacyclin synthase (cytochrome P450 8A1) in complex with substrate analog U51605
446	3lp2_1_ligand_01	0.227924	Molecule	3lp2	Aspartyl protease//DNA-binding//DNA-directed DNA polymerase//Endonuclease//Hydrolase//Multifunctional enzyme//Nuclease//Nucleotidyltransferase//Protease//RNA-binding//RNA-directed DNA polymerase//Transferase//Viral nucleoprotein	HIV-1 reverse transcriptase with inhibitor
447	1m2p_1_ligand_01-s	0.22349	Molecule	1m2p	Kinase//Serine/threonine-protein kinase//Transferase	Crystal structure of 1,8-di-hydroxy-4-nitro-anthraquinone/CK2 kinase complex
448	2bxm_2_ligand_01	0.223052	Molecule	2bxm	DNA-binding//Antioxidant	Human serum albumin complexed with myristate and indomethacin
449	1s64_4_ligand_01	0.221958	Molecule	1s64	Prenyltransferase//Transferase	Rat protein geranylgeranyltransferase type-I complexed with L-778,123 and a sulfate anion
450	3hcr_2_ligand_01	0.220694	Molecule	3hcr	Lyase	Human Ferrochelatase with deuteroporphyrin and Ni Bound
451	5cvc_1_ligand_01	0.220476	Molecule	5cvc	No Keywords	Structure of maize serine racemase
452	2q2z_1_ligand_01	0.220257	Molecule	2q2z	Motor protein	Crystal Structure of KSP in Complex with Inhibitor 22
453	2ft9_2_ligand_01-s	0.220238	Molecule	2ft9	No Keywords	Crystal structure of axolotl (Ambystoma mexicanum) liver bile acid-binding protein bound to cholic acid
454	4f9w_3_ligand_01	0.219771	Molecule	4f9w	Kinase//Serine/threonine-protein kinase//Transferase	Human P38alpha MAPK in Complex with a Novel and Selective Small Molecule Inhibitor
455	2oaz_1_ligand_01-s	0.216506	Molecule	2oaz	Aminopeptidase//Hydrolase//Protease	Human Methionine Aminopeptidase-2 Complexed with SB-587094
456	4bb3_1_ligand_01	0.214643	Molecule	4bb3	Oxidoreductase	Isopenicillin N synthase with the dipeptide substrate analogue AhC
457	2hu4_4_ligand_01-s	0.21431	Molecule	2hu4	Glycosidase//Hydrolase	N1 neuraminidase in complex with oseltamivir 2
458	4ez7_3_ligand_01	0.21245	Molecule	4ez7	Kinase//Serine/threonine-protein kinase//Transferase	CDK2 in complex with staurosporine and 2 molecules of 8-anilino-1-naphthalene sulfonic acid
459	5a2y_2_ligand_01	0.212157	Molecule	5a2y	No Keywords	Crystal structure of mtPAP in complex with UTP
460	3at4_1_ligand_01	0.211946	Molecule	3at4	Kinase//Serine/threonine-protein kinase//Transferase	Crystal structure of CK2alpha with pyradine derivertive
461	4wfr_1_ligand_01	0.211943	Molecule	4wfr	Hydrolase//RNA-binding	Catalytic domain of mouse 2',3'-cyclic nucleotide 3'- phosphodiesterase, with mutation T232A, complexed with 2'-AMP
462	4c67_1_ligand_01	0.211299	Molecule	4c67	Chromatin regulator	Discovery of Epigenetic Regulator I-BET762: Lead Optimization to Afford a Clinical Candidate Inhibitor of the BET Bromodomains
463	4az0_1_ligand_01	0.210662	Molecule	4az0	Carboxypeptidase//Hydrolase//Protease	crystal structure of cathepsin a, complexed with 8a.
464	2gir_2_ligand_01	0.210408	Molecule	2gir	Helicase//Hydrolase//Ion channel//Multifunctional enzyme//Nucleotidyltransferase//Protease//Ribonucleoprotein//RNA-binding//RNA-directed RNA polymerase//Serine protease//Thiol protease//Transferase//Viral ion channel//Viral nucleoprotein	Hepatitis C virus RNA-dependent RNA polymerase NS5B with NNI-1 inhibitor
465	2d81_1_ligand_01	0.208823	Molecule	2d81	Hydrolase	PHB depolymerase (S39A) complexed with R3HB trimer
466	1lco_1_ligand_01	0.207397	Molecule	1lco	Oxidoreductase	X-RAY STRUCTURE OF TWO COMPLEXES OF THE Y143F FLAVOCYTOCHROME B2 MUTANT CRYSTALLIZED IN THE PRESENCE OF LACTATE OR PHENYL-LACTATE
467	4qkn_1_ligand_01	0.207324	Molecule	4qkn	Dioxygenase//Oxidoreductase	Crystal structure of FTO bound to a selective inhibitor
468	1phq_1_ligand_01	0.207186	Molecule	1phq	Transferase	Crystal structure of KDO8P synthase in its binary complex with substrate analog E-FPEP
469	4dsc_1_ligand_01	0.206288	Molecule	4dsc	Protein phosphatase inhibitor//Receptor	Complex structure of abscisic acid receptor PYL3 with (+)-ABA in spacegroup of H32 at 1.95A
470	4yu1_1_ligand_01-s	0.204862	Molecule	4yu1	Oxidoreductase	Human Aldose Reductase complexed with Schl12134 (3-[5-(3-nitrophenyl)-2-thienyl]propanoic acid) at 1.02 A
471	3gob_1_ligand_01	0.203833	Molecule	3gob	Oxidoreductase	Crystal Structure of Dicamba Monooxygenase with Non-heme Cobalt and DCSA
472	2vpr_1_ligand_01	0.203789	Molecule	2vpr	DNA-binding//Repressor	Tet repressor class H in complex with 5a,6- anhydrotetracycline-Mg
473	4l42_1_ligand_01	0.203768	Molecule	4l42	Kinase//Serine/threonine-protein kinase//Transferase	Crystal structures of human p70S6K1-PIF
474	4jtw_2_ligand_01	0.202964	Molecule	4jtw	Helicase//Hydrolase//Ion channel//Multifunctional enzyme//Nucleotidyltransferase//Protease//Ribonucleoprotein//RNA-binding//RNA-directed RNA polymerase//Serine protease//Thiol protease//Transferase//Viral ion channel//Viral nucleoprotein	Crystal structure of HCV NS5B polymerase in complex with coupound 1
475	2pdb_1_ligand_01-s	0.2017	Molecule	2pdb	Oxidoreductase	Human aldose reductase mutant F121P complexed with zopolrestat.
476	3zsz_2_ligand_01	0.199417	Molecule	3zsz	DNA-binding//Endonuclease//Hydrolase//Multifunctional enzyme//Nuclease//Nucleotidyltransferase//RNA-directed DNA polymerase//Transferase	Small molecule inhibitors of the LEDGF site of HIV type 1 integrase identified by fragment screening and structure based drug design
477	4zbr_3_ligand_01	0.197443	Molecule	4zbr	DNA-binding	Crystal Structure of Equine Serum Albumin in complex with Diclofenac and Naproxen
478	3zku_1_ligand_01	0.196881	Molecule	3zku	Oxidoreductase	Isopenicillin N synthase with substrate analogue AhCV
479	4b42_2_ligand_01	0.196014	Molecule	4b42	Nucleotidyltransferase//Transferase	Pseudomonas aeruginosa RmlA in complex with allosteric inhibitor
480	4hfr_2_ligand_01	0.194583	Molecule	4hfr	Oxidoreductase	Human 11beta-Hydroxysteroid Dehydrogenase Type 1 in complex with an orally bioavailable acidic inhibitor AZD4017.
481	3v3m_1_ligand_01	0.1908	Molecule	3v3m	Endonuclease//Hydrolase//Nuclease//Protease//RNA-binding//Thiol protease	Severe Acute Respiratory Syndrome Coronavirus (SARS-CoV) 3CL Protease in Complex with N-[(1R)-2-(tert-butylamino)-2-oxo-1-(pyridin-3-yl)ethyl]-N-(4-tert-butylphenyl)furan-2-carboxamide inhibitor.
482	3gl2_2_ligand_01	0.190668	Molecule	3gl2	Oxidoreductase	Crystal structure of dicamba monooxygenase bound to dicamba
484	4e9a_1_ligand_01	0.189646	Molecule	4e9a	Hydrolase	Structure of Peptide Deformylase form Helicobacter Pylori in complex with inhibitor
485	3f88_3_ligand_01	0.188429	Molecule	3f88	Developmental protein//Kinase//Serine/threonine-protein kinase//Signal transduction inhibitor//Transferase	glycogen synthase Kinase 3beta inhibitor complex
486	2csn_1_ligand_01	0.188053	Molecule	2csn	Kinase//Serine/threonine-protein kinase//Transferase	BINARY COMPLEX OF CASEIN KINASE-1 WITH CKI7
487	3qn8_1_ligand_01-s	0.187722	Molecule	3qn8	Aspartyl protease//DNA-binding//DNA-directed DNA polymerase//Endonuclease//Hydrolase//Multifunctional enzyme//Nuclease//Nucleotidyltransferase//Protease//RNA-binding//RNA-directed DNA polymerase//Transferase//Viral nucleoprotein	HIV-1 protease (mutant Q7K L33I L63I) in complex with a novel inhibitor
488	2hvn_1_ligand_01-s	0.182432	Molecule	2hvn	Oxidoreductase	Human Aldose Reductase-zopolrestat complex obtained by cocrystallisation after one day (1day_cocryst)
489	4ly9_1_ligand_01	0.18148	Molecule	4ly9	No Keywords	Human GKRP complexed to AMG-1694 [(2R)-1,1,1-trifluoro-2-{4-[(2S)-2-{[(3S)-3-methylmorpholin-4-yl]methyl}-4-(thiophen-2-ylsulfonyl)piperazin-1-yl]phenyl}propan-2-ol] and sorbitol-6-phosphate
490	4b4g_2_ligand_01	0.178857	Molecule	4b4g	Nucleotidyltransferase//Transferase	Pseudomonas aeruginosa RmlA in complex with allosteric inhibitor
491	3fpa_1_ligand_01	0.172771	Molecule	3fpa	Ligase	Crystal structure of Mycobacterium tuberculosis dethiobiotin synthetase complexed with dethiobiotin and phosphate
492	2d81_1_ligand_01-s	0.16934	Molecule	2d81	Hydrolase	PHB depolymerase (S39A) complexed with R3HB trimer
493	1uog_1_ligand_01-s	0.16921	Molecule	1uog	Oxidoreductase	Deacetoxycephalosporin C synthase complexed with deacetoxycephalosporin C
494	3nr4_1_ligand_01	0.168041	Molecule	3nr4	Protein phosphatase inhibitor//Receptor	Pyrabactin-bound PYL2
495	4jbs_1_ligand_01	0.167975	Molecule	4jbs	Aminopeptidase//Hydrolase//Metalloprotease//Protease	Crystal structure of the human Endoplasmic Reticulum Aminopeptidase 2 in complex with PHOSPHINIC PSEUDOTRIPEPTIDE inhibitor.
496	4ju6_1_ligand_01	0.167689	Molecule	4ju6	Helicase//Hydrolase//Ion channel//Multifunctional enzyme//Nucleotidyltransferase//Protease//Ribonucleoprotein//RNA-binding//RNA-directed RNA polymerase//Serine protease//Thiol protease//Transferase//Viral ion channel//Viral nucleoprotein	Crystal structure of hcv ns5b polymerase in complex with compound 24
497	4ju7_1_ligand_01	0.167689	Molecule	4ju7	Helicase//Hydrolase//Ion channel//Multifunctional enzyme//Nucleotidyltransferase//Protease//Ribonucleoprotein//RNA-binding//RNA-directed RNA polymerase//Serine protease//Thiol protease//Transferase//Viral ion channel//Viral nucleoprotein	Crystal structure of hcv ns5b polymerase in complex with compound 24
498	4zk6_1_ligand_01	0.167505	Molecule	4zk6	Transferase	Crystallographic Capture of Quinolinate Synthase (NadA) from Pyrococcus horikoshii in its Substrates and Product-Bound States
499	2qxw_1_ligand_01	0.167278	Molecule	2qxw	Oxidoreductase	Perdeuterated alr2 in complex with idd594
500	4fam_1_ligand_01	0.166673	Molecule	4fam	Oxidoreductase	Crystal structure of human 17beta-hydroxysteroid dehydrogenase type 5 in complex with 3-((3,4-dihydroisoquinolin-2(1H)-yl)sulfonyl)benzoic acid (17)
501	2fz9_1_ligand_01-s	0.16667	Molecule	2fz9	Oxidoreductase	Human Aldose Reductase complexed with inhibitor zopolrestat after six days soaking.
502	3s79_1_ligand_01	0.164814	Molecule	3s79	Monooxygenase//Oxidoreductase	Human placental aromatase cytochrome P450 (CYP19A1) refined at 2.75 angstrom
503	4klv_1_ligand_01	0.163973	Molecule	4klv	No Keywords	Crystal structure of a GNAT superfamily acetyltransferase PA4794 in complex with 4-methylumbelliferyl phosphate
504	3veh_1_ligand_01	0.161615	Molecule	3veh	Isomerase//Lyase	Structure of a M. tuberculosis salicylate synthase, MbtI, in complex with an inhibitor methylAMT
505	4l3j_1_ligand_01-s	0.160973	Molecule	4l3j	Kinase//Serine/threonine-protein kinase//Transferase	Crystal structures of human p70S6K1 kinase domain
506	4cjq_2_ligand_01	0.160172	Molecule	4cjq	DNA-binding//Endonuclease//Hydrolase//Multifunctional enzyme//Nuclease//Nucleotidyltransferase//RNA-directed DNA polymerase//Transferase	Interrogating HIV integrase for compounds that bind- a SAMPL challenge
507	2bjs_1_ligand_01	0.158975	Molecule	2bjs	Oxidoreductase	Isopenicillin N synthase C-terminal truncation mutant
508	4jbt_2_ligand_01	0.157872	Molecule	4jbt	Monooxygenase//Oxidoreductase	The 2.2 A crystal structure of CYP154C5 from Nocardia farcinica in complex with androstenedione
509	3dzl_3_ligand_01	0.15545	Molecule	3dzl	No Keywords	Crystal structure of PhzA/B from Burkholderia cepacia R18194 in complex with (R)-3-oxocyclohexanecarboxylic acid
510	1t40_1_ligand_01	0.154625	Molecule	1t40	Oxidoreductase	Crystal structure of human aldose reductase complexed with NADP and IDD552 at ph 5
511	2pdc_1_ligand_01	0.152651	Molecule	2pdc	Oxidoreductase	Human aldose reductase mutant F121P complexed with IDD393.
512	4cf2_1_ligand_01	0.152035	Molecule	4cf2	DNA-binding//Endonuclease//Hydrolase//Multifunctional enzyme//Nuclease//Nucleotidyltransferase//RNA-directed DNA polymerase//Transferase	Interrogating HIV integrase for compounds that bind- a SAMPL challenge
513	1zyj_1_ligand_01-s	0.149701	Molecule	1zyj	Kinase//Serine/threonine-protein kinase//Transferase	Human P38 MAP Kinase in Complex with Inhibitor 1a
514	1w06_1_ligand_01	0.149412	Molecule	1w06	Oxidoreductase	Isopenicillin N Synthase Aminoadipoyl-Cysteinyl-Alanine-Fe NO Complex
515	4c73_1_ligand_01	0.148878	Molecule	4c73	Acyltransferase//Transferase	Crystal structure of M. tuberculosis C171Q KasA in complex with TLM6
516	1xom_1_ligand_01	0.148279	Molecule	1xom	Hydrolase	Catalytic Domain Of Human Phosphodiesterase 4D In Complex With Cilomilast
517	2q94_1_ligand_01	0.145018	Molecule	2q94	Aminopeptidase//Hydrolase//Protease	E. coli methionine aminopeptidase Mn-form with inhibitor A04
518	4f3g_1_ligand_01	0.1414	Molecule	4f3g	Ion channel//Ligand-gated ion channel//Receptor	Kainate bound to the ligand binding domain of GluA3i
519	4hxo_1_ligand_01	0.138645	Molecule	4hxo	Chromatin regulator	Brd4 Bromodomain 1 complex with 3-{[(3-METHYL-1,2-OXAZOL-5-YL)METHYL]SULFANYL}[1,2,4]TRIAZOLO[4,3-A]PYRIDINE inhibitor
520	3gb4_2_ligand_01	0.137989	Molecule	3gb4	Oxidoreductase	Crystal Structure of Dicamba Monooxygenase with Non-heme Cobalt and Dicamba
521	3qch_1_ligand_01-s	0.135488	Molecule	3qch	Hydrolase//Protein phosphatase	Human receptor protein tyrosine phosphatase gamma, domain 1, in complex with 3-[(3,4-dichlorobenzyl)sulfanyl]-N-(methylsulfonyl)thiophene-2-carboxamide
522	3fvu_1_ligand_01	0.134536	Molecule	3fvu	Aminotransferase//Lyase//Transferase	Crystal Structure of Human Kynurenine Aminotransferase I in Complex with Indole-3-acetic Acid
523	4j6c_1_ligand_01	0.132963	Molecule	4j6c	Monooxygenase//Oxidoreductase	The 1.9 A crystal structure of CYP154C5 from Nocardia farcinica in complex with progesterone
524	3zt2_1_ligand_01	0.132885	Molecule	3zt2	DNA-binding//Endonuclease//Hydrolase//Multifunctional enzyme//Nuclease//Nucleotidyltransferase//RNA-directed DNA polymerase//Transferase	Small molecule inhibitors of the LEDGF site of HIV type 1 integrase identified by fragment screening and structure based drug design
525	3k4y_1_ligand_01	0.130633	Molecule	3k4y	Kinase//Transferase	Crystal Structure of Isopentenyl Phosphate Kinase from M. jannaschii in complex with IPP
526	1e8m_1_ligand_01	0.130564	Molecule	1e8m	Hydrolase//Protease//Serine protease	PROLYL OLIGOPEPTIDASE FROM PORCINE BRAIN, MUTANT, COMPLEXED WITH INHIBITOR
527	1us0_1_ligand_01	0.128547	Molecule	1us0	Oxidoreductase	Human Aldose Reductase in complex with NADP+ and the inhibitor IDD594 at 0.66 Angstrom
528	2iuz_2_ligand_01-s	0.127141	Molecule	2iuz	Glycosidase//Hydrolase	Crystal structure of Aspergillus fumigatus chitinase B1 in complex with C2-dicaffeine
529	3m0i_1_ligand_01-s	0.124254	Molecule	3m0i	Oxidoreductase	Human Aldose Reductase mutant T113V in complex with Zopolrestat
530	4dbw_3_ligand_01-s	0.123625	Molecule	4dbw	Oxidoreductase	Crystal structure of human 17beta-hydroxysteroid dehydrogenase type 5 (AKR1C3) in complex with NADP+ and 2'-desmethyl-indomethacin
531	2i17_1_ligand_01	0.122891	Molecule	2i17	Oxidoreductase	Human aldose reductase in complex with NADP+ and the inhibitor IDD594 at temperature of 60K
532	3vey_2_ligand_01	0.120705	Molecule	3vey	Allosteric enzyme//Kinase//Transferase	glucokinase in complex with glucose and ATPgS
533	1tfz_1_ligand_01	0.119148	Molecule	1tfz	Dioxygenase//Oxidoreductase	Structural basis for herbicidal inhibitor selectivity revealed by comparison of crystal structures of plant and mammalian 4-hydroxyphenylpyruvate dioxygenases
534	4jju_2_ligand_01	0.117921	Molecule	4jju	Helicase//Hydrolase//Ion channel//Multifunctional enzyme//Nucleotidyltransferase//Protease//Ribonucleoprotein//RNA-binding//RNA-directed RNA polymerase//Serine protease//Thiol protease//Transferase//Viral ion channel//Viral nucleoprotein	Crystal structure of HCV NS5B polymerase in complex with COMPOUND 29
535	1om1_1_ligand_01	0.117571	Molecule	1om1	Kinase//Serine/threonine-protein kinase//Transferase	Crystal structure of maize CK2 alpha in complex with IQA
536	3dy7_1_ligand_01	0.117172	Molecule	3dy7	Kinase//Serine/threonine-protein kinase//Transferase//Tyrosine-protein kinase	X-ray structure of the human mitogen-activated protein kinase kinase 1 (MEK1) in a complex with ligand and MgATP
537	4eji_2_ligand_01	0.115589	Molecule	4eji	Monooxygenase//Oxidoreductase	Human Cytochrome P450 2A13 in complex with two molecules of 4-(methylnitrosamino)-1-(3-puridyl)-1-butanone
538	4klr_2_ligand_01	0.115116	Molecule	4klr	Lyase	E343Q variant of human ferrochelatase
539	2gz7_1_ligand_01-s	0.114086	Molecule	2gz7	Hydrolase//Protease//RNA-binding//Thiol protease	Structure-Based Drug Design and Structural Biology Study of Novel Nonpeptide Inhibitors of SARS-CoV Main Protease
540	2gz7_1_ligand_01	0.114086	Molecule	2gz7	Hydrolase//Protease//RNA-binding//Thiol protease	Structure-Based Drug Design and Structural Biology Study of Novel Nonpeptide Inhibitors of SARS-CoV Main Protease
541	2pdm_1_ligand_01	0.113263	Molecule	2pdm	Oxidoreductase	Human aldose reductase mutant S302R complexed with zopolrestat.
542	3pe1_1_ligand_01	0.111888	Molecule	3pe1	Kinase//Serine/threonine-protein kinase//Transferase	Crystal structure of human protein kinase CK2 alpha subunit in complex with the inhibitor CX-4945
543	2woa_3_ligand_01	0.111642	Molecule	2woa	Hydrolase//Metalloprotease//Protease	MMP12 complex with a beta hydroxy carboxylic acid
544	1oyn_2_ligand_01	0.111021	Molecule	1oyn	Hydrolase	Crystal structure of PDE4D2 in complex with (R,S)-rolipram
545	3mf5_1_ligand_01	0.109402	Molecule	3mf5	Helicase//Hydrolase//Ion channel//Multifunctional enzyme//Nucleotidyltransferase//Protease//Ribonucleoprotein//RNA-binding//RNA-directed RNA polymerase//Serine protease//Thiol protease//Transferase//Viral ion channel//Viral nucleoprotein	Hepatitis C virus polymerase NS5B (BK) with amide bioisostere thumb site inhibitor
546	3qn8_1_ligand_01	0.108732	Molecule	3qn8	Aspartyl protease//DNA-binding//DNA-directed DNA polymerase//Endonuclease//Hydrolase//Multifunctional enzyme//Nuclease//Nucleotidyltransferase//Protease//RNA-binding//RNA-directed DNA polymerase//Transferase//Viral nucleoprotein	HIV-1 protease (mutant Q7K L33I L63I) in complex with a novel inhibitor
547	3lu8_1_ligand_01	0.10858	Molecule	3lu8	DNA-binding//Antioxidant	Human serum albumin in complex with compound 3
548	2vro_1_ligand_01	0.106853	Molecule	2vro	Oxidoreductase	Crystal structure of aldehyde dehydrogenase from Burkholderia xenovorans LB400
549	4cjf_1_ligand_01-s	0.106408	Molecule	4cjf	DNA-binding//Endonuclease//Hydrolase//Multifunctional enzyme//Nuclease//Nucleotidyltransferase//RNA-directed DNA polymerase//Transferase	Interrogating HIV integrase for compounds that bind- a SAMPL challenge
550	4cjf_1_ligand_01	0.106408	Molecule	4cjf	DNA-binding//Endonuclease//Hydrolase//Multifunctional enzyme//Nuclease//Nucleotidyltransferase//RNA-directed DNA polymerase//Transferase	Interrogating HIV integrase for compounds that bind- a SAMPL challenge
551	4std_3_ligand_01-s	0.104869	Molecule	4std	Lyase	HIGH RESOLUTION STRUCTURES OF SCYTALONE DEHYDRATASE-INHIBITOR COMPLEXES CRYSTALLIZED AT PHYSIOLOGICAL PH
552	2rlc_1_ligand_01	0.100912	Molecule	2rlc	Hydrolase	Crystal Structure of the Conjugated Bile Acid Hydrolase from Clostridium perfringens in Complex with Reaction Products Glycine and Cholate
553	2i16_1_ligand_01	0.100907	Molecule	2i16	Oxidoreductase	Human aldose reductase in complex with NADP+ and the inhibitor IDD594 at temperature of 15K
554	3gts_2_ligand_01	0.100841	Molecule	3gts	Oxidoreductase	Crystal Structure of Dicamba Monooxygenase with Non-heme Iron and Dicamba
555	3mb9_1_ligand_01	0.0997673	Molecule	3mb9	Oxidoreductase	Human Aldose Reductase mutant T113A complexed with Zopolrestat
556	2q93_1_ligand_01-s	0.0987505	Molecule	2q93	Aminopeptidase//Hydrolase//Protease	E. coli methionine aminopeptidase Mn-form with inhibitor B21
557	4u0k_1_ligand_01-s	0.0980807	Molecule	4u0k	Oxidoreductase	Crystal structure of Mycobacterium tuberculosis enoyl reductase complexed with N-(5-chloro-2-methylphenyl)-1-cyclohexyl-5-oxopyrrolidine-3-carboxamide
558	3qpn_1_ligand_01-s	0.0947453	Molecule	3qpn	Allosteric enzyme//Hydrolase	Structure of PDE10-inhibitor complex
559	4ck3_2_ligand_01	0.0943464	Molecule	4ck3	DNA-binding//Endonuclease//Hydrolase//Multifunctional enzyme//Nuclease//Nucleotidyltransferase//RNA-directed DNA polymerase//Transferase	Interrogating HIV integrase for compounds that bind- a SAMPL challenge
560	1re0_1_ligand_01	0.0938854	Molecule	1re0	RNA-binding//Guanine-nucleotide releasing factor	Structure of ARF1-GDP bound to Sec7 domain complexed with Brefeldin A
561	4py6_2_ligand_01	0.0920522	Molecule	4py6	No Keywords	Crystal Structure of bromodomain of PFA0510w from Plasmodium Falciparum
562	2fz8_1_ligand_01-s	0.0892812	Molecule	2fz8	Oxidoreductase	Human Aldose reductase complexed with inhibitor zopolrestat at 1.48 A(1 day soaking).
563	3tlk_3_ligand_01	0.0844768	Molecule	3tlk	No Keywords	Crystal structure of holo FepB
564	2dux_1_ligand_01-s	0.0841489	Molecule	2dux	Oxidoreductase	Crystal structure of human Aldose Reductase complexed with zopolrestat after 3 days soaking (3days_soaked_1)
565	1fw0_1_ligand_01	0.0825632	Molecule	1fw0	Ion channel//Ligand-gated ion channel//Receptor	CRYSTAL STRUCTURE OF THE GLUR2 LIGAND BINDING CORE (S1S2J) IN COMPLEX WITH KAINATE AT 2.0 A RESOLUTION
566	4iqk_1_ligand_01	0.0819752	Molecule	4iqk	No Keywords	Crystal structure of cpd 16 bound to Keap1 Kelch domain
567	1sze_2_ligand_01	0.0807885	Molecule	1sze	Oxidoreductase	L230A mutant flavocytochrome b2 with benzoylformate
568	2r9w_1_ligand_01-s	0.0792463	Molecule	2r9w	Hydrolase	AmpC beta-lactamase with bound Phthalamide inhibitor
569	2wug_1_ligand_01	0.0790238	Molecule	2wug	Hydrolase	Crystal structure of S114A mutant of HsaD from Mycobacterium tuberculosis in complex with HOPDA
570	3c35_2_ligand_01	0.0761953	Molecule	3c35	Ion channel//Ligand-gated ion channel//Receptor	Crystal structure of GluR5 ligand-binding core in complex with cesium at 1.97 Angstrom resolution
571	4hxx_1_ligand_01	0.0750498	Molecule	4hxx	Aminopeptidase//Hydrolase//Protease	Pyridinylpyrimidines selectively inhibit human methionine aminopeptidase-1
572	4anv_1_ligand_01	0.0724246	Molecule	4anv	Kinase//Serine/threonine-protein kinase//Transferase	Complexes of PI3Kgamma with isoform selective inhibitors.
573	4cjk_2_ligand_01	0.0723265	Molecule	4cjk	DNA-binding//Endonuclease//Hydrolase//Multifunctional enzyme//Nuclease//Nucleotidyltransferase//RNA-directed DNA polymerase//Transferase	Interrogating HIV integrase for compounds that bind- a SAMPL challenge
574	3gph_2_ligand_01	0.0707031	Molecule	3gph	Monooxygenase//Oxidoreductase	Human cytochrome P450 2E1 in complex with omega-imidazolyl-decanoic acid
575	2ab2_1_ligand_01	0.0669908	Molecule	2ab2	DNA-binding//Receptor	Mineralocorticoid Receptor Double Mutant with Bound Spironolactone
576	3c36_1_ligand_01	0.0660893	Molecule	3c36	Ion channel//Ligand-gated ion channel//Receptor	Crystal structure of GluR5 ligand-binding core in complex with ammonium ions at 1.68 Angstrom resolution
577	1tbb_1_ligand_01	0.0648629	Molecule	1tbb	Hydrolase	Catalytic Domain Of Human Phosphodiesterase 4D In Complex With Rolipram
578	5cwa_1_ligand_01	0.0639911	Molecule	5cwa	Lyase	Structure of Anthranilate Synthase Component I (TrpE) from Mycobacterium tuberculosis with inhibitor bound
579	3pgh_2_ligand_01	0.0629136	Molecule	3pgh	Dioxygenase//Oxidoreductase//Peroxidase	CYCLOOXYGENASE-2 (PROSTAGLANDIN SYNTHASE-2) COMPLEXED WITH A NON-SELECTIVE INHIBITOR, FLURBIPROFEN
580	2xy3_4_ligand_01	0.0625074	Molecule	2xy3	Hydrolase	Structure of the Bacillus subtilis prophage dUTPase with dUpNHpp
581	3qch_1_ligand_01	0.0622777	Molecule	3qch	Hydrolase//Protein phosphatase	Human receptor protein tyrosine phosphatase gamma, domain 1, in complex with 3-[(3,4-dichlorobenzyl)sulfanyl]-N-(methylsulfonyl)thiophene-2-carboxamide
582	4tzk_1_ligand_01	0.0618933	Molecule	4tzk	Oxidoreductase	Crystal structure of Mycobacterium tuberculosis enoyl reductase (INHA) complexed WITH 1-CYCLOHEXYL-N-(3,5-DICHLOROPHENYL)-5-OXOPYRROLIDINE-3-CARBOXAMIDE
583	3pe2_1_ligand_01	0.0613325	Molecule	3pe2	Kinase//Serine/threonine-protein kinase//Transferase	Crystal structure of human protein kinase CK2 in complex with the inhibitor CX-5011
584	3c34_1_ligand_01	0.0592892	Molecule	3c34	Ion channel//Ligand-gated ion channel//Receptor	Crystal structure of GluR5 ligand-binding core in complex with rubidium at 1.82 Angstrom resolution
585	3l05_1_ligand_01	0.0591635	Molecule	3l05	Transferase	Crystal structure of N-acetyl-L-ornithine transcarbamylase E92S mutant complexed with carbamyl phosphate and N-succinyl-L-norvaline
586	1obn_1_ligand_01	0.0569101	Molecule	1obn	Oxidoreductase	ISOPENICILLIN N SYNTHASE aminoadipoyl-cysteinyl-aminobutyrate-FE-NO COMPLEX
587	2b07_1_ligand_01	0.0565536	Molecule	2b07	Hydrolase//Protein phosphatase	Crystal structure of PTP1B with Tricyclic Thiophene inhibitor.
588	2itz_1_ligand_01	0.0551821	Molecule	2itz	Developmental protein//Host cell receptor for virus entry//Kinase//Receptor//Transferase//Tyrosine-protein kinase	Crystal structure of EGFR kinase domain L858R mutation in complex with Iressa
589	2zf4_9_ligand_01	0.0535916	Molecule	2zf4	No Keywords	Crystal Structure of VioE complexed with phenylpyruvic acid
590	4cgg_1_ligand_01	0.0529733	Molecule	4cgg	DNA-binding//Endonuclease//Hydrolase//Multifunctional enzyme//Nuclease//Nucleotidyltransferase//RNA-directed DNA polymerase//Transferase	Interrogating HIV integrase for compounds that bind- a SAMPL challenge
591	2iuz_2_ligand_01	0.0518436	Molecule	2iuz	Glycosidase//Hydrolase	Crystal structure of Aspergillus fumigatus chitinase B1 in complex with C2-dicaffeine
592	2wo9_3_ligand_01-s	0.0518159	Molecule	2wo9	Hydrolase//Metalloprotease//Protease	MMP12 complex with a beta hydroxy carboxylic acid
593	2pzn_1_ligand_01	0.0502307	Molecule	2pzn	Oxidoreductase	The crystallographic structure of Aldose Reductase IDD393 complex confirms Leu300 as a specificity determinant
594	2woa_3_ligand_01-s	0.0489781	Molecule	2woa	Hydrolase//Metalloprotease//Protease	MMP12 complex with a beta hydroxy carboxylic acid
595	4a86_1_ligand_01	0.0488047	Molecule	4a86	Pathogenesis-related protein	Crystal Structure of Major Birch Pollen Allergen Bet v 1 a in ternary complex with kinetin and 8-Anilinonaphthalene-1-sulfonate (ANS)
596	3iog_1_ligand_01	0.0482363	Molecule	3iog	Hydrolase	Crystal structure of CphA N220G mutant with inhibitor 18
597	1z89_1_ligand_01	0.0437436	Molecule	1z89	Oxidoreductase	Human Aldose Reductase complexed with novel Sulfonyl-pyridazinone Inhibitor
598	4eb7_2_ligand_01	0.0437062	Molecule	4eb7	Transferase	A. fulgidus IscS-IscU complex structure
599	3qh2_2_ligand_01	0.0429658	Molecule	3qh2	Isomerase	Crystal structure of TenI from Bacillus subtilis complexed with product cThz-P
600	1om1_1_ligand_01-s	0.0429184	Molecule	1om1	Kinase//Serine/threonine-protein kinase//Transferase	Crystal structure of maize CK2 alpha in complex with IQA
601	1og5_1_ligand_01	0.0427085	Molecule	1og5	Monooxygenase//Oxidoreductase	Structure of human cytochrome P450 CYP2C9
602	4fr8_1_ligand_01	0.0417099	Molecule	4fr8	Oxidoreductase	Crystal structure of human aldehyde dehydrogenase-2 in complex with nitroglycerin
603	3zt3_2_ligand_01	0.0415124	Molecule	3zt3	DNA-binding//Endonuclease//Hydrolase//Multifunctional enzyme//Nuclease//Nucleotidyltransferase//RNA-directed DNA polymerase//Transferase	Small molecule inhibitors of the LEDGF site of HIV type 1 integrase identified by fragment screening and structure based drug design
604	1nb6_1_ligand_01	0.0404152	Molecule	1nb6	Helicase//Hydrolase//Ion channel//Multifunctional enzyme//Nucleotidyltransferase//Protease//Ribonucleoprotein//RNA-binding//RNA-directed RNA polymerase//Serine protease//Thiol protease//Transferase//Viral ion channel//Viral nucleoprotein	HC-J4 RNA polymerase complexed with UTP
605	3eqm_1_ligand_01	0.0386646	Molecule	3eqm	Monooxygenase//Oxidoreductase	Crystal structure of human placental aromatase cytochrome P450 in complex with androstenedione
606	2pdb_1_ligand_01	0.0376557	Molecule	2pdb	Oxidoreductase	Human aldose reductase mutant F121P complexed with zopolrestat.
607	2g97_1_ligand_01	0.037521	Molecule	2g97	Cytokine//Glycosyltransferase//Transferase	Crystal Structure of Visfatin/Pre-B Cell Colony Enhancing Factor 1/Nicotinamide Phosphoribosyltransferase In Complex with the Specific Inhibitor FK-866
608	4j06_2_ligand_01	0.0375159	Molecule	4j06	Helicase//Hydrolase//Ion channel//Multifunctional enzyme//Nucleotidyltransferase//Protease//Ribonucleoprotein//RNA-binding//RNA-directed RNA polymerase//Serine protease//Thiol protease//Transferase//Viral ion channel//Viral nucleoprotein	Crystal structure of hcv ns5b polymerase in complex with 2-{[(5-BROMOTHIOPHEN-2-YL)SULFONYL]AMINO}-4-CHLOROBENZOIC ACID
609	3vhu_1_ligand_01	0.0365787	Molecule	3vhu	DNA-binding//Receptor	Mineralocorticoid receptor ligand-binding domain with spironolactone
610	2qe2_1_ligand_01	0.0352868	Molecule	2qe2	Helicase//Hydrolase//Nucleotidyltransferase//Protease//RNA-directed RNA polymerase//Thiol protease//Transferase	Structure of HCV NS5B Bound to an Anthranilic Acid Inhibitor
611	2pd5_1_ligand_01	0.0324647	Molecule	2pd5	Oxidoreductase	Human aldose reductase mutant V47I complexed with zopolrestat
612	3ig6_1_ligand_01	0.0322542	Molecule	3ig6	Hydrolase//Protease//Serine protease	Low molecular weigth human Urokinase type Plasminogen activator 2-[6-(3'-Aminomethyl-biphenyl-3-yloxy)-4-(3-dimethylamino-pyrrolidin-1-yl)-3,5-difluoro-pyridin-2-yloxy]-4-dimethylamino-benzoic acid complex
613	4l98_2_ligand_01	0.0321575	Molecule	4l98	Activator//DNA-binding//Receptor	Crystal structure of the complex of F360L PPARgamma mutant with the ligand LT175
614	3g5e_1_ligand_01	0.03215	Molecule	3g5e	Oxidoreductase	Human aldose reductase complexed with IDD 740 inhibitor
615	1yw9_1_ligand_01	0.0319555	Molecule	1yw9	Aminopeptidase//Hydrolase//Protease	h-MetAP2 complexed with A849519
616	2zxg_1_ligand_01	0.0313597	Molecule	2zxg	Aminopeptidase//Hydrolase//Metalloprotease//Protease	Aminopeptidase N complexed with the aminophosphinic inhibitor of PL250, a transition state analogue
617	3m0i_1_ligand_01	0.0312148	Molecule	3m0i	Oxidoreductase	Human Aldose Reductase mutant T113V in complex with Zopolrestat
618	1h69_4_ligand_01	0.03046	Molecule	1h69	Oxidoreductase	CRYSTAL STRUCTURE OF HUMAN NAD[P]H-QUINONE OXIDOREDUCTASE CO WITH 2,3,5,6,TETRAMETHYL-P-BENZOQUINONE (DUROQUINONE) AT 2.5 ANGSTROM RESOLUTION
619	4jvn_1_ligand_01	0.0303274	Molecule	4jvn	Transferase	Crystal structure of human estrogen sulfotransferase (SULT1E1) in complex with inactive cofactor PAP and metabolite of brominated flame retardant 3OH BDE47 (3-hydroxyl bromodiphenyl ether)
620	5dby_2_ligand_01	0.0294585	Molecule	5dby	DNA-binding	Crystal Structure of Equine Serum Albumin in Complex with Diclofenac and Naproxen Obtained in Displacement Experiment
621	4bxk_1_ligand_01	0.029364	Molecule	4bxk	Carboxypeptidase//Hydrolase//Metalloprotease//Protease	Crystal structure of the Angiotensin-1 converting enzyme N-domain in complex with a domain-specific inhibitor
622	1qyx_1_ligand_01	0.028786	Molecule	1qyx	Oxidoreductase	Crystal structure of human estrogenic 17beta-hydroxysteroid dehydrogenase complex with androstenedione and NADP
623	3sl8_1_ligand_01	0.0261381	Molecule	3sl8	Hydrolase	Crystal structure of the catalytic domain of PDE4D2 with compound 10o
624	4b4g_2_ligand_01-s	0.0241126	Molecule	4b4g	Nucleotidyltransferase//Transferase	Pseudomonas aeruginosa RmlA in complex with allosteric inhibitor
625	3fu8_2_ligand_01	0.0232745	Molecule	3fu8	Oxidoreductase	Melanocarpus albomyces laccase crystal soaked (10 sec) with 2,6-dimethoxyphenol
626	2pdp_1_ligand_01	0.0228325	Molecule	2pdp	Oxidoreductase	Human aldose reductase mutant S302R complexed with IDD 393.
627	4fl0_1_ligand_01	0.0227179	Molecule	4fl0	Aminotransferase//Transferase	Crystal structure of ALD1 from Arabidopsis thaliana
628	4hai_1_ligand_01	0.0226123	Molecule	4hai	Hydrolase//Multifunctional enzyme	Crystal structure of human soluble epoxide hydrolase complexed with N-cycloheptyl-1-(mesitylsulfonyl)piperidine-4-carboxamide.
629	3ty3_1_ligand_01	0.0221545	Molecule	3ty3	Oxidoreductase	Crystal structure of homoisocitrate dehydrogenase from Schizosaccharomyces pombe bound to glycyl-glycyl-glycine
630	3t2v_1_ligand_01	0.0209568	Molecule	3t2v	Antibiotic//Antimicrobial	Crystal structure of the complex of peptidoglycan recognition protein-short (CPGRP-S) with mycolic acid at 2.5 A resolution
631	1fa0_3_ligand_01	0.0207993	Molecule	1fa0	RNA-binding//Transferase	STRUCTURE OF YEAST POLY(A) POLYMERASE BOUND TO MANGANATE AND 3'-DATP
632	4j0a_1_ligand_01	0.0204076	Molecule	4j0a	Helicase//Hydrolase//Ion channel//Multifunctional enzyme//Nucleotidyltransferase//Protease//Ribonucleoprotein//RNA-binding//RNA-directed RNA polymerase//Serine protease//Thiol protease//Transferase//Viral ion channel//Viral nucleoprotein	Crystal structure of hcv ns5b polymerase in complex with 2-{[(4-METHYLPHENYL)SULFONYL]AMINO}-4-PHENOXYBENZOIC ACID
633	2nru_2_ligand_01	0.0202401	Molecule	2nru	Kinase//Serine/threonine-protein kinase//Transferase	Crystal structure of IRAK-4
634	1q8u_1_ligand_01	0.0199535	Molecule	1q8u	Kinase//Serine/threonine-protein kinase//Transferase	The Catalytic Subunit of cAMP-dependent Protein Kinase in Complex with Rho-kinase Inhibitor H-1152P
635	4ba5_1_ligand_01	0.019762	Molecule	4ba5	Aminotransferase//Transferase	Crystal structure of omega-transaminase from Chromobacterium violaceum
636	2pdl_1_ligand_01	0.019579	Molecule	2pdl	Oxidoreductase	Human aldose reductase mutant L301M complexed with tolrestat.
637	1n0u_1_ligand_01	0.0166036	Molecule	1n0u	Elongation factor//RNA-binding//rRNA-binding	Crystal structure of yeast elongation factor 2 in complex with sordarin
638	2ikj_1_ligand_01	0.0165509	Molecule	2ikj	Oxidoreductase	Human aldose reductase complexed with nitro-substituted IDD-type inhibitor
639	2pdj_1_ligand_01	0.0165095	Molecule	2pdj	Oxidoreductase	Human aldose reductase mutant L300A complexed with IDD393.
640	4meo_1_ligand_01-s	0.0164067	Molecule	4meo	Chromatin regulator	Crystal Structure of the first bromodomain of human BRD4 in complex with a 2-methyl-quinoline ligand
641	2qw0_1_ligand_01	0.0158337	Molecule	2qw0	Ligase	4-Chlorobenzoyl-CoA Ligase/Synthetase, I303A mutation, bound to 3,4 Dichlorobenzoate
642	4cfd_2_ligand_01	0.0151699	Molecule	4cfd	DNA-binding//Endonuclease//Hydrolase//Multifunctional enzyme//Nuclease//Nucleotidyltransferase//RNA-directed DNA polymerase//Transferase	Interrogating HIV integrase for compounds that bind- a SAMPL challenge
643	2pdq_1_ligand_01	0.0150948	Molecule	2pdq	Oxidoreductase	Human aldose reductase mutant C303D complexed with uracil-type inhibitor.
644	2pdi_1_ligand_01	0.0138032	Molecule	2pdi	Oxidoreductase	Human aldose reductase mutant L300A complexed with zopolrestat at 1.55 A.
645	4jq1_1_ligand_01	0.0137202	Molecule	4jq1	Oxidoreductase	AKR1C2 complex with naproxen
646	2aa6_1_ligand_01	0.0133204	Molecule	2aa6	DNA-binding//Receptor	Mineralocorticoid Receptor S810L Mutant with Bound Progesterone
647	3m64_1_ligand_01	0.0131657	Molecule	3m64	Oxidoreductase	Human aldose reductase mutant T113V complexed with IDD393
648	4ie5_1_ligand_01	0.0127554	Molecule	4ie5	Dioxygenase//Oxidoreductase	Crystal structure of the human fat mass and obesity associated protein (FTO) in complex with N-[(3-hydroxypyridin-2-yl)carbonyl]glycine (MD6)
649	3fgo_1_ligand_01	0.0124536	Molecule	3fgo	Hydrolase	Crystal Structure of the E2 magnesium fluoride complex of the (SR) Ca2+-ATPase with bound CPA and AMPPCP
650	1kt8_2_ligand_01	0.0121591	Molecule	1kt8	Aminotransferase//Transferase	HUMAN BRANCHED CHAIN AMINO ACID AMINOTRANSFERASE (MITOCHONDRIAL): THREE DIMENSIONAL STRUCTURE OF ENZYME IN ITS KETIMINE FORM WITH THE SUBSTRATE L-ISOLEUCINE
651	2daa_2_ligand_01	0.0118107	Molecule	2daa	Aminotransferase//Transferase	CRYSTALLOGRAPHIC STRUCTURE OF D-AMINO ACID AMINOTRANSFERASE INACTIVATED BY D-CYCLOSERINE
652	3stu_1_ligand_01	0.0115432	Molecule	3stu	No Keywords	Crystal Structure of tomato Methylketone Synthase I complexed with methyl-3-hydroxydodecanoate
653	3g1o_1_ligand_01	0.01098	Molecule	3g1o	DNA-binding//Repressor	EthR from Mycobacterium tuberculosis in complex with compound BDM14500
654	3mc5_1_ligand_01	0.00997108	Molecule	3mc5	Oxidoreductase	Human Aldose Reductase mutant T113V in complex with IDD393 crystallized in spacegroup P1
655	4adc_1_ligand_01	0.00991791	Molecule	4adc	Aminotransferase//Transferase	Structural and functional study of succinyl-ornithine transaminase from E. coli
656	1fdw_1_ligand_01	0.00974677	Molecule	1fdw	Oxidoreductase	HUMAN 17-BETA-HYDROXYSTEROID-DEHYDROGENASE TYPE 1 MUTANT H221Q COMPLEXED WITH ESTRADIOL
657	2duz_1_ligand_01-s	0.0096899	Molecule	2duz	Oxidoreductase	Human Aldose Reductase complexed with inhibitor zopolrestat after 3 days soaking (3days_soaked_2)
658	1lbb_1_ligand_01	0.00935046	Molecule	1lbb	Ion channel//Ligand-gated ion channel//Receptor	Crystal structure of the GluR2 ligand binding domain mutant (S1S2J-N754D) in complex with kainate at 2.1 A resolution
659	4c71_2_ligand_01	0.00926053	Molecule	4c71	Acyltransferase//Transferase	Crystal structure of M. tuberculosis C171Q KasA in complex with TLM18
660	3zs5_1_ligand_01	0.00876689	Molecule	3zs5	Kinase//Serine/threonine-protein kinase//Transferase	Structural basis for kinase selectivity of three clinical p38alpha inhibitors
661	4ie6_1_ligand_01	0.0086206	Molecule	4ie6	Dioxygenase//Oxidoreductase	Crystal structure of the human fat mass and obesity associated protein (FTO) in complex with N-[(1-chloro-4-hydroxyisoquinolin-3-yl)carbonyl]glycine (IOX3/UN9)
662	4koy_1_ligand_01	0.00775384	Molecule	4koy	No Keywords	Crystal structure of a GNAT superfamily acetyltransferase PA4794 in complex with Cephalosporin C
663	3efl_1_ligand_01	0.00711029	Molecule	3efl	Developmental protein//Kinase//Receptor//Transferase//Tyrosine-protein kinase	Crystal structure of the VEGFR2 kinase domain in complex with motesanib
664	4h8i_1_ligand_01	0.00702112	Molecule	4h8i	Ion channel//Ligand-gated ion channel//Receptor	Structure of GluK2-LBD in complex with GluAzo
665	4std_3_ligand_01	0.00691058	Molecule	4std	Lyase	HIGH RESOLUTION STRUCTURES OF SCYTALONE DEHYDRATASE-INHIBITOR COMPLEXES CRYSTALLIZED AT PHYSIOLOGICAL PH
666	4dyp_1_ligand_01	0.00615186	Molecule	4dyp	Ribonucleoprotein//RNA-binding//Viral nucleoprotein	Crystal Structure of WSN/A Influenza Nucleoprotein with BMS-831780 Ligand Bound
667	4lht_2_ligand_01	0.00543431	Molecule	4lht	Monooxygenase//Oxidoreductase	Crystal Structure of P450cin Y81F mutant, crystallized in 3 mM 1,8-cineole
668	4rw6_1_ligand_01	0.00533027	Molecule	4rw6	Aspartyl protease//DNA-binding//DNA-directed DNA polymerase//Endonuclease//Hydrolase//Multifunctional enzyme//Nuclease//Nucleotidyltransferase//Protease//RNA-binding//RNA-directed DNA polymerase//Transferase//Viral nucleoprotein	Crystal Structure of HIV-1 Reverse Transcriptase (Y181C) variant in complex with (E)-3-(3-chloro-5-(4-chloro-2-(2-(2,4-dioxo-3,4- dihydropyrimidin-1(2H)-yl)ethoxy)phenoxy)phenyl)acrylonitrile (JLJ494), a Non-nucleoside Inhibitor
669	4a31_1_ligand_01	0.00515275	Molecule	4a31	Acyltransferase//Transferase	CRYSTAL STRUCTURE OF LEISHMANIA MAJOR N-MYRISTOYLTRANSFERASE (NMT) WITH BOUND MYRISTOYL-COA AND A PYRAZOLE SULPHONAMIDE LIGAND
670	3rv6_1_ligand_01	0.00465471	Molecule	3rv6	Isomerase//Lyase	Structure of a M. tuberculosis Salicylate Synthase, MbtI, in Complex with an Inhibitor with Phenyl R-Group
671	4or0_6_ligand_01	0.00458038	Molecule	4or0	DNA-binding	Crystal Structure of Bovine Serum Albumin in complex with naproxen
672	3m4h_1_ligand_01	0.00453756	Molecule	3m4h	Oxidoreductase	Human Aldose Reductase mutant T113V complexed with IDD388
673	2c3i_1_ligand_01	0.0043	Molecule	2c3i	Kinase//Serine/threonine-protein kinase//Transferase	CRYSTAL STRUCTURE OF HUMAN PIM1 IN COMPLEX WITH IMIDAZOPYRIDAZIN I
674	1z3n_1_ligand_01	0.00411168	Molecule	1z3n	Oxidoreductase	Human aldose reductase in complex with NADP+ and the inhibitor lidorestat at 1.04 angstrom
675	3t7p_1_ligand_01-s	0.00403242	Molecule	3t7p	Aspartyl protease//Hydrolase//Protease	Endothiapepsin in complex with a hydrazide derivative
676	2fz9_1_ligand_01	0.00378703	Molecule	2fz9	Oxidoreductase	Human Aldose Reductase complexed with inhibitor zopolrestat after six days soaking.
677	3v49_1_ligand_01	0.00320735	Molecule	3v49	Activator//DNA-binding//Receptor	Structure of ar lbd with activator peptide and sarm inhibitor 1
678	2pbw_1_ligand_01	0.00246099	Molecule	2pbw	Ion channel//Ligand-gated ion channel//Receptor	Crystal Structure of the Ligand-Binding Core of iGluR5 in Complex with the Partial agonist Domoic Acid at 2.5 A Resolution
679	4hge_2_ligand_01	0.00202001	Molecule	4hge	Chromatin regulator//Kinase//Transferase//Tyrosine-protein kinase	JAK2 kinase (JH1 domain) in complex with compound 8
680	3ogk_3_ligand_01	0.00201971	Molecule	3ogk	No Keywords	Structure of COI1-ASK1 in complex with coronatine and an incomplete JAZ1 degron
681	4kox_1_ligand_01	0.00200237	Molecule	4kox	No Keywords	Crystal structure of a GNAT superfamily acetyltransferase PA4794 in complex with Cefalotin
682	3rga_2_ligand_01	0.00180723	Molecule	3rga	Isomerase	Crystal structure of epoxide hydrolase for polyether lasalocid A biosynthesis
683	4gg7_1_ligand_01	0.00175592	Molecule	4gg7	Kinase//Receptor//Transferase//Tyrosine-protein kinase	Crystal structure of cMET in complex with novel inhibitor
684	4eo8_2_ligand_01	0.00175486	Molecule	4eo8	Helicase//Hydrolase//Ion channel//Multifunctional enzyme//Nucleotidyltransferase//Protease//Ribonucleoprotein//RNA-binding//RNA-directed RNA polymerase//Serine protease//Thiol protease//Transferase//Viral ion channel//Viral nucleoprotein	HCV NS5B polymerase inhibitors: Tri-substituted acylhydrazines as tertiary amide bioisosteres
685	3v94_7_ligand_01	0.00169929	Molecule	3v94	Hydrolase	TcrPDEC1 catalytic domain in complex with inhibitor wyq16
686	3zbx_1_ligand_01	0.00165066	Molecule	3zbx	Kinase//Receptor//Transferase//Tyrosine-protein kinase	X-ray Structure of c-Met kinase in complex with inhibitor 6-((6-(4- fluorophenyl)-(1,2,4)triazolo(4,3-b)(1,2,4)triazin-3-yl)methyl) quinoline.
687	3dv3_1_ligand_01	0.00147368	Molecule	3dv3	Kinase//Serine/threonine-protein kinase//Transferase//Tyrosine-protein kinase	MEK1 with PF-04622664 Bound
688	2r9x_2_ligand_01	0.00145686	Molecule	2r9x	Hydrolase	AmpC beta-lactamase with bound Phthalamide inhibitor
689	4cf1_2_ligand_01	0.00129566	Molecule	4cf1	DNA-binding//Endonuclease//Hydrolase//Multifunctional enzyme//Nuclease//Nucleotidyltransferase//RNA-directed DNA polymerase//Transferase	Interrogating HIV integrase for compounds that bind- a SAMPL challenge
690	3i58_2_ligand_01	0.0012748	Molecule	3i58	Methyltransferase//Transferase	Crystal structure of an O-methyltransferase (NcsB1) from neocarzinostatin biosynthesis in complex with S-adenosyl-L-homocysteine (SAH) and 2-hydroxy-7-methoxy-5-methyl naphthoic acid (NA)
691	3vhh_2_ligand_01	0.00125461	Molecule	3vhh	No Keywords	Crystal structure of DiMe-biotin-avidin complex
692	4ej4_1_ligand_01	0.00105325	Molecule	4ej4	G-protein coupled receptor//Receptor//Transducer	Structure of the delta opioid receptor bound to naltrindole
693	4bfv_1_ligand_01	0.000855206	Molecule	4bfv	Kinase//Transferase	Crystal structure of Mycobacterium tuberculosis PanK in complex with a triazole inhibitory compound (1d) and phosphate
694	3qci_1_ligand_01	0.00079909	Molecule	3qci	Hydrolase//Protein phosphatase	Human receptor protein tyrosine phosphatase gamma, domain 1, in complex with N-[(3-aminophenyl)sulfonyl]-3-[(3,4-dichlorobenzyl)sulfanyl]thiophene-2-carboxamide
695	4rw4_1_ligand_01	0.000712179	Molecule	4rw4	Aspartyl protease//DNA-binding//DNA-directed DNA polymerase//Endonuclease//Hydrolase//Multifunctional enzyme//Nuclease//Nucleotidyltransferase//Protease//RNA-binding//RNA-directed DNA polymerase//Transferase//Viral nucleoprotein	Crystal Structure of HIV-1 Reverse Transcriptase (K103N,Y181C) variant in complex with (E)-3-(3-chloro-5-(4-chloro-2-(2-(2,4-dioxo-3,4- dihydropyrimidin-1(2H)-yl)ethoxy)phenoxy)phenyl)acrylonitrile (JLJ494), a Non-nucleoside Inhibitor
696	3ebi_1_ligand_01	0.00061621	Molecule	3ebi	Aminopeptidase//Hydrolase//Metalloprotease//Protease	Structure of the M1 Alanylaminopeptidase from malaria complexed with the phosphinate dipeptide analog
697	2ikh_1_ligand_01	0.000590878	Molecule	2ikh	Oxidoreductase	Human aldose reductase complexed with nitrofuryl-oxadiazol inhibitor at 1.55 A
698	2gnh_1_ligand_01	0.00058591	Molecule	2gnh	Kinase//Serine/threonine-protein kinase//Transferase	PKA five fold mutant model of Rho-kinase with H1152P
699	2dux_1_ligand_01	0.000578839	Molecule	2dux	Oxidoreductase	Crystal structure of human Aldose Reductase complexed with zopolrestat after 3 days soaking (3days_soaked_1)
700	2qvy_1_ligand_01	0.00049704	Molecule	2qvy	Ligase	4-Chlorobenzoyl-CoA Ligase/Synthetase, I303G mutation, bound to 3,4-Dichlorobenzoate
701	3l06_1_ligand_01	0.000440009	Molecule	3l06	Transferase	Crystal structure of N-acetyl-L-ornithine transcarbamylase E92V mutant complexed with carbamyl phosphate and N-succinyl-L-norvaline
702	2pu2_1_ligand_01	0.000407538	Molecule	2pu2	Hydrolase	AmpC beta-lactamase with bound Phthalamide inhibitor
703	1eqh_2_ligand_01	0.000398559	Molecule	1eqh	Dioxygenase//Oxidoreductase//Peroxidase	THE 2.7 ANGSTROM MODEL OF OVINE COX-1 COMPLEXED WITH FLURBIPROFEN
704	1t41_1_ligand_01	0.000312952	Molecule	1t41	Oxidoreductase	Crystal structure of human aldose reductase complexed with NADP and IDD552
705	2hvo_1_ligand_01	0.000258658	Molecule	2hvo	Oxidoreductase	Human Aldose Reductase-zopolrestat complex obtained by cocrystallisation (10days_cocryst)
706	3at3_1_ligand_01	0.000232787	Molecule	3at3	Kinase//Serine/threonine-protein kinase//Transferase	Crystal structure of CK2alpha with pyradine derivative
707	4c6u_1_ligand_01	0.000225694	Molecule	4c6u	Acyltransferase//Transferase	Crystal structure of M. tuberculosis KasA in complex with TLM5
708	4cj4_2_ligand_01	0.000217094	Molecule	4cj4	DNA-binding//Endonuclease//Hydrolase//Multifunctional enzyme//Nuclease//Nucleotidyltransferase//RNA-directed DNA polymerase//Transferase	Interrogating HIV integrase for compounds that bind- a SAMPL challenge
709	1jcq_1_ligand_01	0.000148872	Molecule	1jcq	Prenyltransferase//Transferase	CRYSTAL STRUCTURE OF HUMAN PROTEIN FARNESYLTRANSFERASE COMPLEXED WITH FARNESYL DIPHOSPHATE AND THE PEPTIDOMIMETIC INHIBITOR L-739,750
710	5dq8_2_ligand_01	0.000117995	Molecule	5dq8	Activator//DNA-binding	Crystal structure of human transcription factor TEAD2 in complex with flufenamic acid
711	2nvd_1_ligand_01	9.93159e-05	Molecule	2nvd	Oxidoreductase	Human Aldose Reductase complexed with novel naphtho[1,2-d]isothiazole acetic acid derivative (2)
712	4c9o_1_ligand_01	9.79429e-05	Molecule	4c9o	Monooxygenase//Oxidoreductase	Structure of Cyanide and Camphor bound D259N mutant of CYP101D1
713	2zce_1_ligand_01	9.68123e-05	Molecule	2zce	Aminoacyl-tRNA synthetase//Ligase	Crystal structure of the catalytic domain of pyrrolysyl-tRNA synthetase in complex with pyrrolysine and an ATP analogue
714	1wxj_1_ligand_01	9.599e-05	Molecule	1wxj	Lyase	Crystal Structure Of Tryptophan Synthase A-Subunit with Indole-3-propanol phosphate From Thermus Thermophilus Hb8
715	2aqb_3_ligand_01	8.61378e-05	Molecule	2aqb	Acyltransferase//Transferase	Structure-activity relationships at the 5-position of thiolactomycin: an intact 5(R)-isoprene unit is required for activity against the condensing enzymes from Mycobacterium tuberculosis and Escherchia coli
716	2kaw_1_ligand_01	7.4855e-05	Molecule	2kaw	Developmental protein	NMR structure of the mDvl1 PDZ domain in complex with its inhibitor
717	3rv7_3_ligand_01	7.19708e-05	Molecule	3rv7	Isomerase//Lyase	Structure of a M. tuberculosis Salicylate Synthase, MbtI, in Complex with an Inhibitor with Isopropyl R-Group
718	4dk7_1_ligand_01	5.57707e-05	Molecule	4dk7	Activator//DNA-binding//Receptor	Crystal structure of LXR ligand binding domain in complex with full agonist 1
719	4ph9_1_ligand_01	4.04477e-05	Molecule	4ph9	Dioxygenase//Oxidoreductase//Peroxidase	The structure of Ibuprofen bound to cyclooxygenase-2
720	1r8c_1_ligand_01	3.46699e-05	Molecule	1r8c	Nucleotidyltransferase//RNA-binding//Transferase	Crystal Structures of an Archaeal Class I CCA-Adding Enzyme and Its Nucleotide
721	1g3m_1_ligand_01	3.12265e-05	Molecule	1g3m	Transferase	CRYSTAL STRUCTURE OF HUMAN ESTROGEN SULFOTRANSFERASE IN COMPLEX WITH IN-ACTIVE COFACTOR PAP AND 3,5,3',5'-TETRACHLORO-BIPHENYL-4,4'-DIOL
722	2duz_1_ligand_01	2.50896e-05	Molecule	2duz	Oxidoreductase	Human Aldose Reductase complexed with inhibitor zopolrestat after 3 days soaking (3days_soaked_2)
723	4u0k_1_ligand_01	2.42981e-05	Molecule	4u0k	Oxidoreductase	Crystal structure of Mycobacterium tuberculosis enoyl reductase complexed with N-(5-chloro-2-methylphenyl)-1-cyclohexyl-5-oxopyrrolidine-3-carboxamide
724	2pdh_1_ligand_01	2.09036e-05	Molecule	2pdh	Oxidoreductase	Human aldose reductase mutant L300P complexed with uracil-type inhibitor at 1.45 A.
725	1gsf_1_ligand_01	1.95477e-05	Molecule	1gsf	Transferase	GLUTATHIONE TRANSFERASE A1-1 COMPLEXED WITH ETHACRYNIC ACID
726	2ntr_1_ligand_01	1.77535e-05	Molecule	2ntr	Aspartyl protease//Hydrolase//Protease	Crystal structure of Human Bace-1 bound to inhibitor
727	3o15_1_ligand_01	1.72199e-05	Molecule	3o15	Transferase	Crystal Structure of Bacillus subtilis Thiamin Phosphate Synthase Complexed with a Carboxylated Thiazole Phosphate
728	4yu1_1_ligand_01	1.09607e-05	Molecule	4yu1	Oxidoreductase	Human Aldose Reductase complexed with Schl12134 (3-[5-(3-nitrophenyl)-2-thienyl]propanoic acid) at 1.02 A
729	2fz8_1_ligand_01	5.70886e-06	Molecule	2fz8	Oxidoreductase	Human Aldose reductase complexed with inhibitor zopolrestat at 1.48 A(1 day soaking).
730	3jsx_5_ligand_01	2.01233e-06	Molecule	3jsx	Oxidoreductase	X-ray Crystal structure of NAD(P)H: Quinone Oxidoreductase-1 (NQO1) bound to the coumarin-based inhibitor AS1
731	4bfw_1_ligand_01	7.34442e-07	Molecule	4bfw	Kinase//Transferase	Crystal structure of Mycobacterium tuberculosis PanK in complex with a triazole inhibitory compound (1e) and phosphate
732	2gnl_1_ligand_01	5.22546e-08	Molecule	2gnl	Kinase//Serine/threonine-protein kinase//Transferase	PKA threefold mutant model of Rho-kinase with inhibitor H-1152P
733	2pdu_1_ligand_01	2.64917e-08	Molecule	2pdu	Oxidoreductase	Human aldose reductase mutant C303D complexed with IDD393.
734	1jg0_1_ligand_01	2.12723e-08	Molecule	1jg0	Methyltransferase//Repressor//RNA-binding//Transferase	Crystal structure of Escherichia coli thymidylate synthase complexed with 2'-deoxyuridine-5'-monophosphate and N,O-didansyl-L-tyrosine
735	3tza_1_ligand_01	1.89676e-08	Molecule	3tza	Ion channel//Ligand-gated ion channel//Receptor	Crystal structure of the GluA2 ligand-binding domain (S1S2J) in complex with the antagonist (S)-2-amino-3-(2-(2-carboxyethyl)-5-chloro-4-nitrophenyl)propionic acid at 1.9A resolution
736	1q4g_2_ligand_01	2.18998e-09	Molecule	1q4g	Dioxygenase//Oxidoreductase//Peroxidase	2.0 Angstrom Crystal Structure of Ovine Prostaglandin H2 Synthase-1, in complex with alpha-methyl-4-biphenylacetic acid
