# Supplementary material for: Comprehensive Bioinformatics Analysis Combined with Wet-Lab Experiments to Find Target Proteins of Chinese Medicine Monomer
Source: Molecules. 2022 Sep 19;27(18):6105. doi: 10.3390/molecules27186105 (PMC9504604; doi:10.3390/molecules27186105)
Supplement: Supplementary file 1 [file molecules-27-06105-s001.zip › Supplementary Table S5.csv]

Name	ID	Visible	Visibility Locked	Color	Parent	XYZ:X	XYZ:Y	XYZ:Z	Distance	Category	Types	From	From Chemistry	To	To Chemistry	Angle DHA	Angle HAY	Theta
A:LYS943:HZ3 - 5281406:O5	0	TRUE	FALSE	255 150 0 255	Ligand Non-bond Monitor	107.12	67.0614	17.2451	1.67232	Hydrogen Bond;Electrostatic	Salt Bridge;Attractive Charge	A:LYS943:HZ3	H-Donor;Positive	5281406:O5	H-Acceptor;Negative	130.528	141.434
A:LYS943:HZ2 - 5281406:O4	0	TRUE	FALSE	0 255 0 255	Ligand Non-bond Monitor	108.421	68.7268	16.6238	2.54463	Hydrogen Bond	Conventional Hydrogen Bond	A:LYS943:HZ2	H-Donor	5281406:O4	H-Acceptor	137.09	91.04
A:GLY856:HA1 - 5281406:O1	0	TRUE	FALSE	220 255 220 255	Ligand Non-bond Monitor	110.551	63.0897	10.4043	2.47217	Hydrogen Bond	Carbon Hydrogen Bond	A:GLY856:HA1	H-Donor	5281406:O1	H-Acceptor	162.409	95.519
A:GLY856:HA1 - 5281406:O6	0	TRUE	FALSE	220 255 220 255	Ligand Non-bond Monitor	109.611	62.3322	10.9347	2.64936	Hydrogen Bond	Carbon Hydrogen Bond	A:GLY856:HA1	H-Donor	5281406:O6	H-Acceptor	104.97	93.722
A:GLY856:HA2 - 5281406:O6	0	TRUE	FALSE	220 255 220 255	Ligand Non-bond Monitor	109.218	61.7897	11.5164	2.63068	Hydrogen Bond	Carbon Hydrogen Bond	A:GLY856:HA2	H-Donor	5281406:O6	H-Acceptor	106.096	101.614
5281406:H36 - 5281406:O5	0	TRUE	FALSE	220 255 220 255	Ligand Non-bond Monitor	108.578	67.1308	17.4419	2.42755	Hydrogen Bond	Carbon Hydrogen Bond	5281406:H36	H-Donor	5281406:O5	H-Acceptor	111.737	95.738
A:ASP939:OD2 - 5281406	0	TRUE	FALSE	255 150 0 255	Ligand Non-bond Monitor	106.831	66.8836	13.8055	4.77069	Electrostatic	Pi-Anion	A:ASP939:OD2	Negative	5281406	Pi-Orbitals			14.52
A:LEU855:O - 5281406	0	TRUE	FALSE	170 255 0 255	Ligand Non-bond Monitor	110.2	63.7508	12.9818	2.94746	Other	Pi-Lone Pair	A:LEU855:O	Lone Pair	5281406	Pi-Orbitals			12.386
A:ASP939:OD1 - 5281406	0	TRUE	FALSE	170 255 0 255	Ligand Non-bond Monitor	107.891	66.6091	13.7435	2.91579	Other	Pi-Lone Pair	A:ASP939:OD1	Lone Pair	5281406	Pi-Orbitals			10.828
5281406 - A:LEU855	0	TRUE	FALSE	255 200 255 255	Ligand Non-bond Monitor	115.29	64.4132	11.5035	5.32277	Hydrophobic	Pi-Alkyl	5281406	Pi-Orbitals	A:LEU855	Alkyl
5281406 - A:VAL863	0	TRUE	FALSE	255 200 255 255	Ligand Non-bond Monitor	115.438	63.3604	8.98336	4.05583	Hydrophobic	Pi-Alkyl	5281406	Pi-Orbitals	A:VAL863	Alkyl
5281406 - A:ALA880	0	TRUE	FALSE	255 200 255 255	Ligand Non-bond Monitor	117.4	64.842	9.65852	4.95822	Hydrophobic	Pi-Alkyl	5281406	Pi-Orbitals	A:ALA880	Alkyl
5281406 - A:LEU983	0	TRUE	FALSE	255 200 255 255	Ligand Non-bond Monitor	114.691	67.4203	8.33365	4.42246	Hydrophobic	Pi-Alkyl	5281406	Pi-Orbitals	A:LEU983	Alkyl
5281406 - A:VAL863	0	TRUE	FALSE	255 200 255 255	Ligand Non-bond Monitor	114.264	63.0814	8.92587	4.6249	Hydrophobic	Pi-Alkyl	5281406	Pi-Orbitals	A:VAL863	Alkyl
5281406 - A:LEU983	0	TRUE	FALSE	255 200 255 255	Ligand Non-bond Monitor	113.516	67.1413	8.27616	5.12252	Hydrophobic	Pi-Alkyl	5281406	Pi-Orbitals	A:LEU983	Alkyl
